# Supplementary material
Source: MDPI journal article supplement (https://www.mdpi.com/2073-4344/10/9/1072)
Supplement: s1 [file s1]

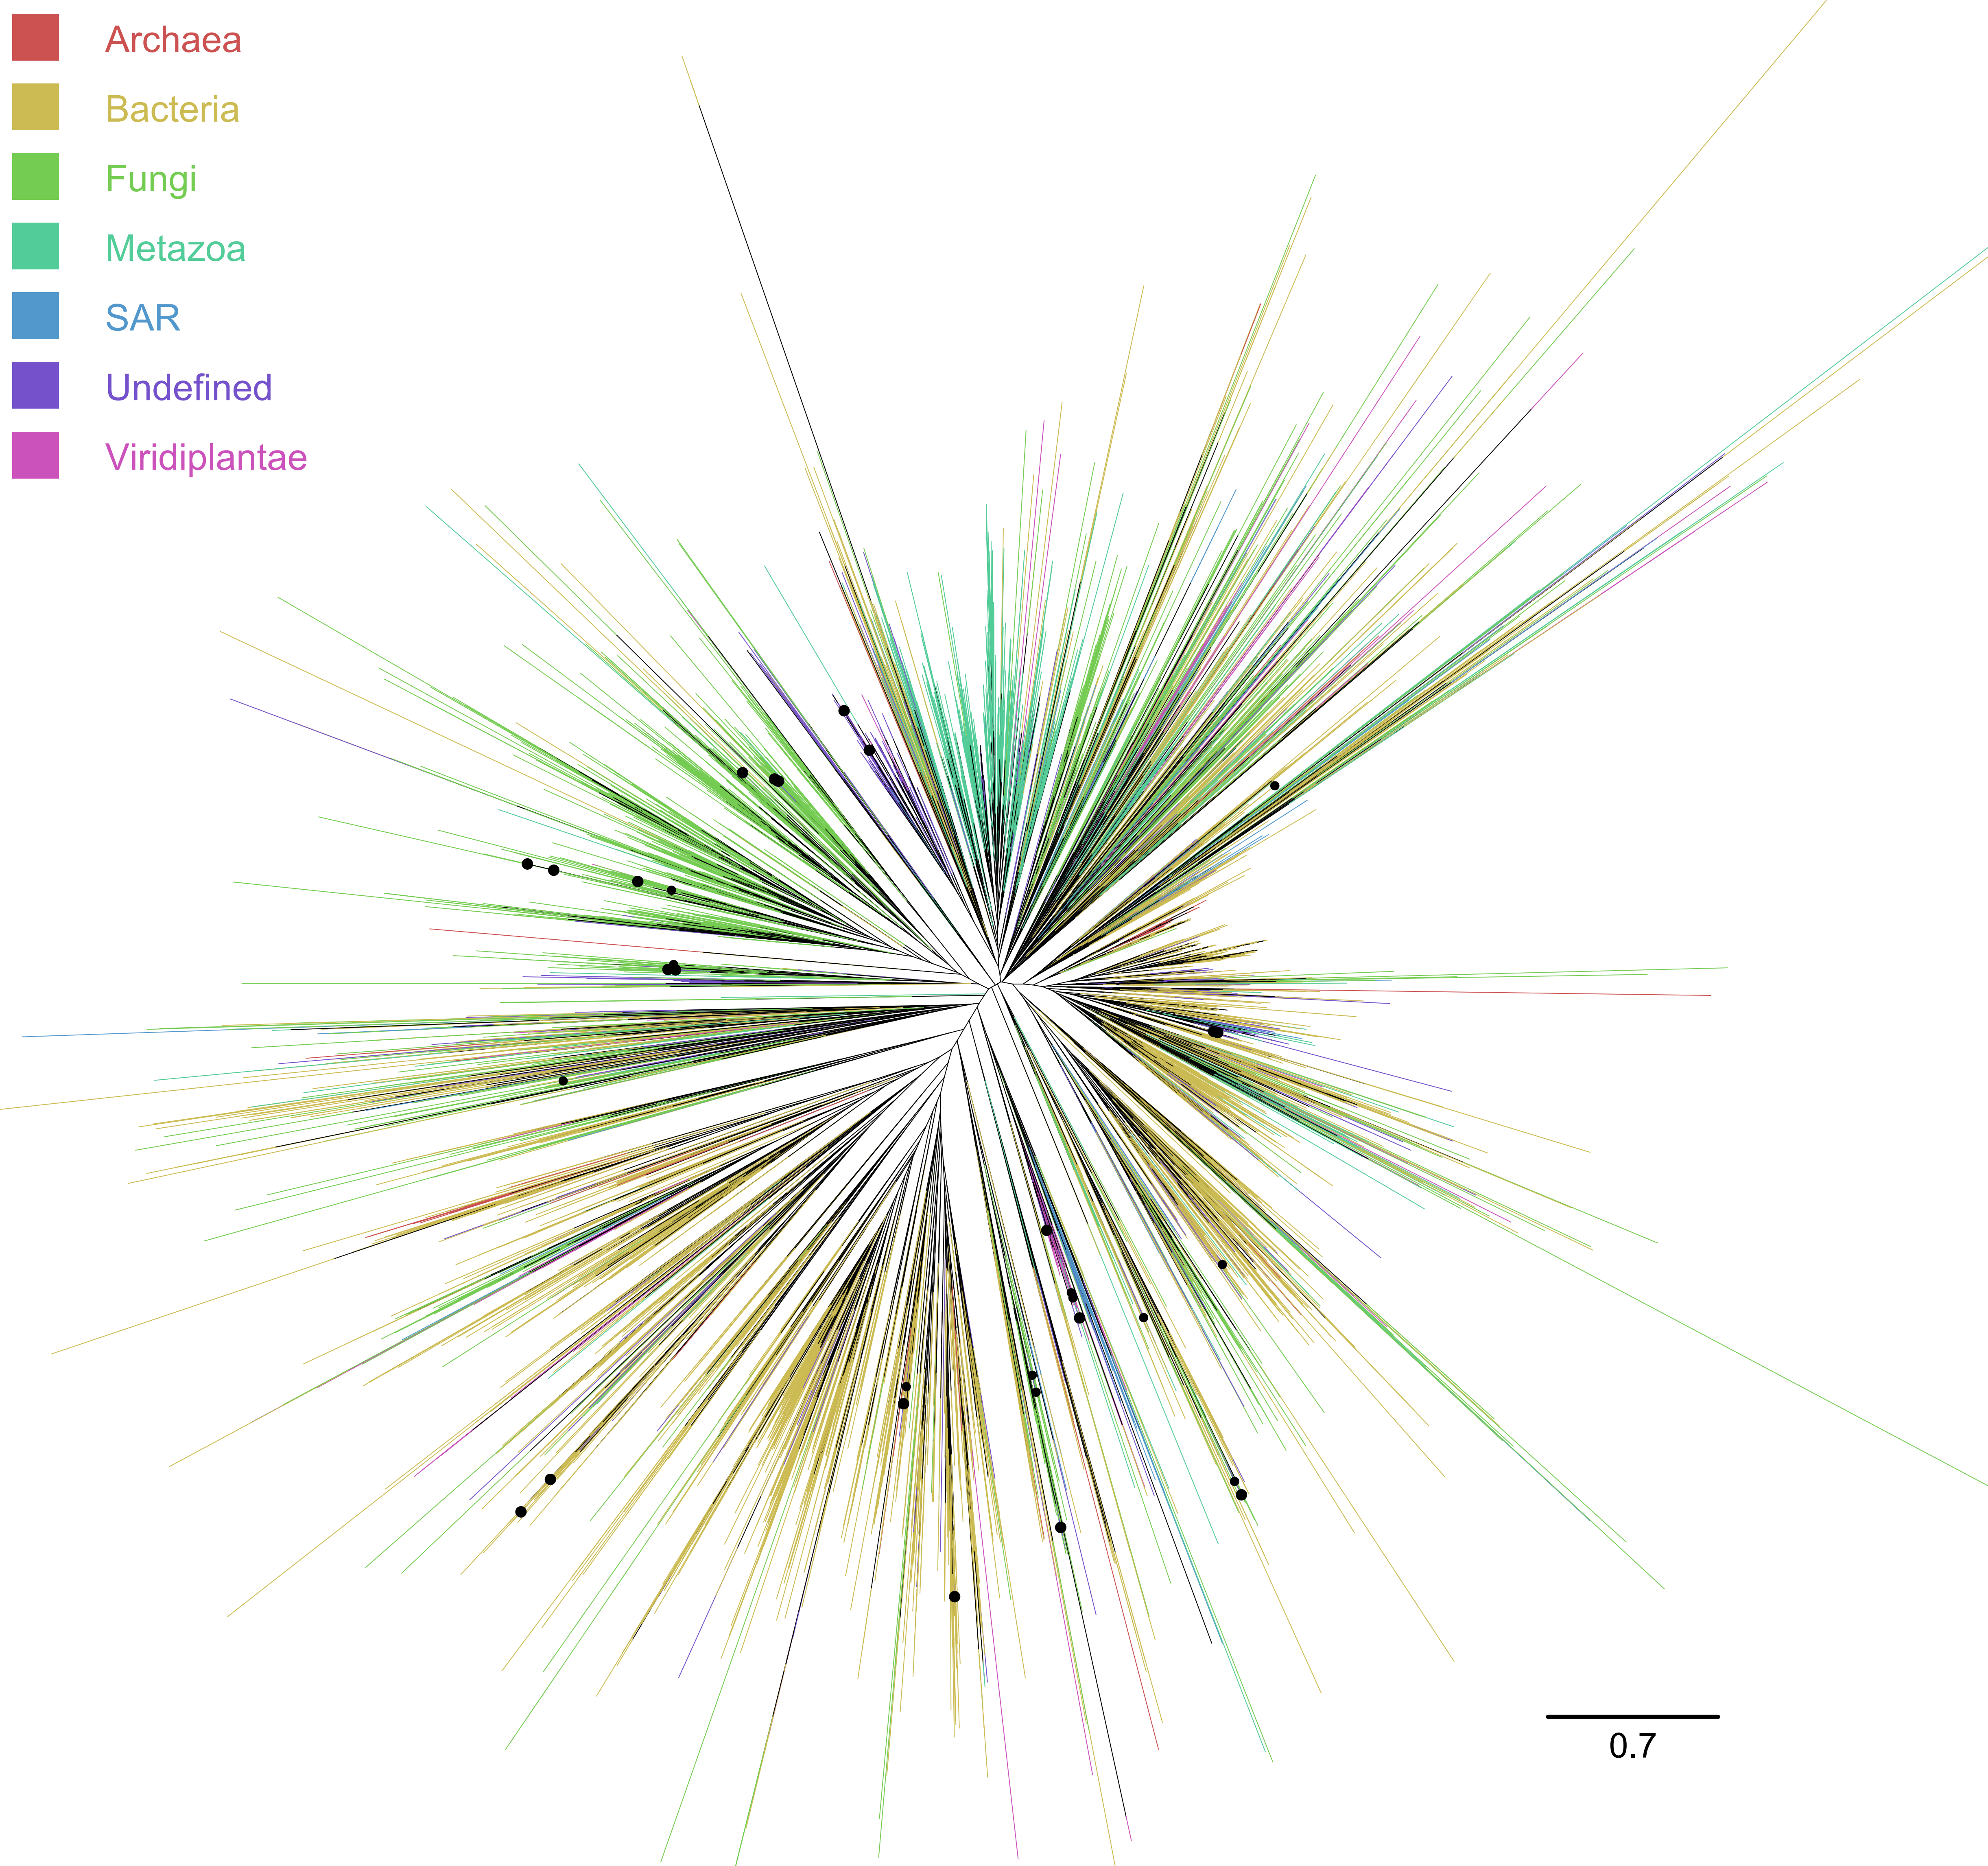

Supplementary Figure 1. Phylogenetic tree of GMC proteins colored according to taxonomic classification.
