# Supplementary material
Source: MDPI journal article supplement (https://www.mdpi.com/2073-4344/10/9/1072)
Supplement: s1 [file s1]

Archive with 12 entries (11 files):
- catalysts-923799-sm-r1/
- catalysts-923799-sm-r1/Supplementary Dataset 1.txt
- catalysts-923799-sm-r1/Supplementary Dataset 2.fasta
- catalysts-923799-sm-r1/Supplementary Dataset 3.xlsx
- catalysts-923799-sm-r1/Supplementary Dataset 4.tre
- catalysts-923799-sm-r1/Supplementary Dataset 5.xlsx
- catalysts-923799-sm-r1/Supplementary Dataset 6.tre
- catalysts-923799-sm-r1/Supplementary Dataset 7.xlsx
- catalysts-923799-sm-r1/Supplementary Dataset 8.fasta
- catalysts-923799-sm-r1/Supplementary Dataset 9.txt
- catalysts-923799-sm-r1/Supplementary Figure S1.pdf
- catalysts-923799-sm-r1/Supplementary Figure S2.pdf
