# Supplementary material
Source: MDPI journal article supplement (https://www.mdpi.com/2073-4344/10/9/1072)
Supplement: s1 [file s1 › catalysts-923799-sm-r1/Supplementary Dataset 1.txt]

Supplementary Dataset 1.
First column shows the Genbank ID of the centroid sequence of the corresponding cluster. Second column shows the Genbank ID.
Cluster_Name	Name
BAA92378.1	BAA92378.1
BAB07804.1	BAB07804.1
BAB11041.1	BAB11041.1
BAB52905.1	BAB52905.1
BAB53014.1	BAB53014.1
BAB69314.1	BAB69314.1
BAC31266.1	BAC31266.1
BAC69641.1	BAC69641.1
BAC89945.1	BAC89945.1
BAD03765.1	BAD03765.1
BAD36748.1	BAD36748.1
BAD55823.1	BAD55823.1
BAF52627.1	BAF52627.1
BAF63433.1	BAF63433.1
BAF98892.1	BAF98892.1
BAG22751.1	BAG22751.1
BAH06716.1	BAH06716.1
BAH23314.1	BAH23314.1
BAI66412.1	BAI66412.1
BAI76668.1	BAI76668.1
BAJ83509.1	BAJ83509.1
BAK00483.1	BAK00483.1
BAJ97253.1	BAJ97253.1
BAK33438.1	BAK33438.1
GAA14188.1	GAA14188.1
GAA14189.1	GAA14189.1
BAK65625.1	BAK65625.1
GAA96987.1	GAA96987.1
GAB07213.1	GAB07213.1
GAA51105.1	GAA51105.1
GAA83592.1	GAA83592.1
GAA84602.1	GAA84602.1
GAA85300.1	GAA85300.1
GAA85321.1	GAA85321.1
GAA87012.1	GAA87012.1
GAA87821.1	GAA87821.1
GAA89018.1	GAA89018.1
GAA89388.1	GAA89388.1
GAA89731.1	GAA89731.1
GAA90501.1	GAA90501.1
GAA92092.1	GAA92092.1
GAA92093.1	GAA92093.1
GAA92455.1	GAA92455.1
BAL26903.1	BAL26903.1
GAB13574.1	GAB13574.1
GAB19035.1	GAB19035.1
GAB17174.1	GAB17174.1
BAL56211.1	BAL56211.1
GAB40083.1	GAB40083.1
BAM18216.1	BAM18216.1
BAM19325.1	BAM19325.1
BAM19497.1	BAM19497.1
BAM19652.1	BAM19652.1
BAM20010.1	BAM20010.1
GAB85400.1	GAB85400.1
GAB84833.1	GAB84833.1
GAC52761.1	GAC52761.1
GAC52547.1	GAC52547.1
GAC71446.1	GAC71446.1
GAC73024.1	GAC73024.1
GAC73048.1	GAC73048.1
GAC76841.1	GAC76841.1
GAC77008.1	GAC77008.1
BAM98987.1	BAM98987.1
BAN09723.1	BAN09723.1
BAN23911.1	BAN23911.1
BAN26129.1	BAN26129.1
BAN27017.1	BAN27017.1
GAD10895.1	GAD10895.1
GAD83826.1	GAD83826.1
BAO02619.1	BAO02619.1
GAD99212.1	GAD99212.1
GAD97845.1	GAD97845.1
GAD96272.1	GAD96272.1
GAD94319.1	GAD94319.1
GAD92606.1	GAD92606.1
GAF06906.1	GAF06906.1
GAF49769.1	GAF49769.1
GAF45536.1	GAF45536.1
GAF59691.1	GAF59691.1
GAJ35755.1	GAJ35755.1
BAO74119.1	BAO74119.1
BAO75974.1	BAO75974.1
GAJ66270.1	GAJ66270.1
GAJ84823.1	GAJ84823.1
GAJ97900.1	GAJ97900.1
GAK20829.1	GAK20829.1
GAL70480.1	GAL70480.1
BAP77888.1	BAP77888.1
BAP81144.1	BAP81144.1
GAM43182.1	GAM43182.1
GAM43309.1	GAM43309.1
GAM42413.1	GAM42413.1
GAM42042.1	GAM42042.1
GAM41580.1	GAM41580.1
GAM41186.1	GAM41186.1
GAM40013.1	GAM40013.1
GAM35263.1	GAM35263.1
GAM33961.1	GAM33961.1
GAM60642.1	GAM60642.1
BAQ21463.1	BAQ21463.1
GAM89669.1	GAM89669.1
GAM89539.1	GAM89539.1
GAM82355.1	GAM82355.1
BAQ25461.1	BAQ25461.1
GAN06663.1	GAN06663.1
GAN00881.1	GAN00881.1
GAN46156.1	GAN46156.1
GAO24173.1	GAO24173.1
GAO25080.1	GAO25080.1
BAR54752.1	BAR54752.1
BAR57361.1	BAR57361.1
GAO56878.1	GAO56878.1
GAO49765.1	GAO49765.1
GAO48841.1	GAO48841.1
GAO90556.1	GAO90556.1
GAO90620.1	GAO90620.1
GAO87642.1	GAO87642.1
GAO87362.1	GAO87362.1
GAP54430.1	GAP54430.1
BAS11459.1	BAS11459.1
GAP60944.1	GAP60944.1
GAP74491.1	GAP74491.1
BAS56733.1	BAS56733.1
BAT01866.1	BAT01866.1
BAT28809.1	BAT28809.1
GAP82378.1	GAP82378.1
GAP93273.1	GAP93273.1
GAP88561.1	GAP88561.1
GAP84499.1	GAP84499.1
GAQ05002.1	GAQ05002.1
BAT62473.1	BAT62473.1
BAU01723.1	BAU01723.1
GAQ37865.1	GAQ37865.1
GAQ33408.1	GAQ33408.1
GAQ46286.1	GAQ46286.1
GAQ44988.1	GAQ44988.1
GAQ43345.1	GAQ43345.1
GAQ88026.1	GAQ88026.1
GAQ86564.1	GAQ86564.1
BAU41472.1	BAU41472.1
GAT17132.1	GAT17132.1
GAT11592.1	GAT11592.1
GAS98308.1	GAS98308.1
GAS92759.1	GAS92759.1
GAT23119.1	GAT23119.1
GAT59067.1	GAT59067.1
GAT55587.1	GAT55587.1
GAT54989.1	GAT54989.1
GAT54545.1	GAT54545.1
GAT52077.1	GAT52077.1
GAT51838.1	GAT51838.1
GAT51545.1	GAT51545.1
GAT51506.1	GAT51506.1
GAT50369.1	GAT50369.1
GAT44749.1	GAT44749.1
GAT72408.1	GAT72408.1
GAU07295.1	GAU07295.1
GAU46199.1	GAU46199.1
GAU24155.1	GAU24155.1
GAU16175.1	GAU16175.1
GAU85268.1	GAU85268.1
GAV14850.1	GAV14850.1
BAW03607.1	BAW03607.1
BAW24125.1	BAW24125.1
BAW31625.1	BAW31625.1
BAW31958.1	BAW31958.1
GAW10651.1	GAW10651.1
GAW09956.1	GAW09956.1
GAW09733.1	GAW09733.1
GAW09041.1	GAW09041.1
GAW08847.1	GAW08847.1
GAW04455.1	GAW04455.1
GAW03273.1	GAW03273.1
GAW02283.1	GAW02283.1
GAW00795.1	GAW00795.1
GAW00054.1	GAW00054.1
GAV99472.1	GAV99472.1
GAW21260.1	GAW21260.1
GAW19858.1	GAW19858.1
GAW16197.1	GAW16197.1
GAW15582.1	GAW15582.1
GAW13627.1	GAW13627.1
GAW13676.1	GAW13676.1
GAW12920.1	GAW12920.1
GAW25109.1	GAW25109.1
GAW25110.1	GAW25110.1
GAP84975.2	GAP84975.2
GAW26035.1	GAW26035.1
GAP88172.2	GAP88172.2
GAW25729.1	GAW25729.1
GAW48717.1	GAW48717.1
BAY21227.1	BAY21227.1
BAZ47615.1	BAZ47615.1
GAX26792.1	GAX26792.1
GAX18337.1	GAX18337.1
GAX56515.1	GAX56515.1
GAY02026.1	GAY02026.1
GAY14190.1	GAY14190.1
GBC46867.1	GBC46867.1
GBD04272.1	GBD04272.1
GBD03300.1	GBD03300.1
GBD40076.1	GBD40076.1
GBD44909.1	GBD44909.1
GBD00867.1	GBD00867.1
GBD08441.1	GBD08441.1
GBE25502.1	GBE25502.1
GBE24793.1	GBE24793.1
GBD95767.1	GBD95767.1
GBD94522.1	GBD94522.1
GBD90413.1	GBD90413.1
GAY33060.1	GAY33060.1
GBG07368.1	GBG07368.1
GBG33482.1	GBG33482.1
GBG26093.1	GBG26093.1
GBG25358.1	GBG25358.1
GBF98468.1	GBF98468.1
GBF88787.1	GBF88787.1
GBC07649.1	GBC07649.1
GBB96603.1	GBB96603.1
GBB91303.1	GBB91303.1
BBD72049.1	BBD72049.1
GBL27247.1	GBL27247.1
BBD96771.1	BBD96771.1
GCB19910.1	GCB19910.1
GCB18120.1	GCB18120.1
GCD41027.1	GCD41027.1
GCD91168.1	GCD91168.1
BBI50542.1	BBI50542.1
BBI52733.1	BBI52733.1
BBH93757.1	BBH93757.1
GBP02863.1	GBP02863.1
GBP17327.1	GBP17327.1
GBP08482.1	GBP08482.1
GBP95983.1	GBP95983.1
GBP87847.1	GBP87847.1
GBP87855.1	GBP87855.1
GBP83031.1	GBP83031.1
GBP82187.1	GBP82187.1
GBP65442.1	GBP65442.1
GBP64870.1	GBP64870.1
GBP61829.1	GBP61829.1
GBP60114.1	GBP60114.1
GBP60115.1	GBP60115.1
GBP55491.1	GBP55491.1
GBP43948.1	GBP43948.1
GBP43975.1	GBP43975.1
GBP43981.1	GBP43981.1
GBP30542.1	GBP30542.1
GBP25901.1	GBP25901.1
GBP02689.1	GBP02689.1
GDY58940.1	GDY58940.1
GDY60394.1	GDY60394.1
GDX26763.1	GDX26763.1
GDX59091.1	GDX59091.1
GDX56631.1	GDX56631.1
GDX56186.1	GDX56186.1
GDX68291.1	GDX68291.1
GDX76219.1	GDX76219.1
GDX81761.1	GDX81761.1
GDX80800.1	GDX80800.1
GDX79056.1	GDX79056.1
GDX78969.1	GDX78969.1
GDX93772.1	GDX93772.1
GEB03458.1	GEB03458.1
GEC22109.1	GEC22109.1
BBG94253.1	BBG94253.1
BBH01192.1	BBH01192.1
BBM03134.1	BBM03134.1
GEM11781.1	GEM11781.1
GEM11269.1	GEM11269.1
GEM09762.1	GEM09762.1
GEO02400.1	GEO02400.1
GEP53673.1	GEP53673.1
GEN13440.1	GEN13440.1
GEK09070.1	GEK09070.1
GBM67012.1	GBM67012.1
GBL80370.1	GBL80370.1
GBN28112.1	GBN28112.1
GBN11690.1	GBN11690.1
GBM93050.1	GBM93050.1
GBM55349.1	GBM55349.1
GBM38470.1	GBM38470.1
GBO44009.1	GBO44009.1
GBO34091.1	GBO34091.1
GBO20211.1	GBO20211.1
GBO16464.1	GBO16464.1
GBN92093.1	GBN92093.1
GBN76146.1	GBN76146.1
GBN33898.1	GBN33898.1
GBN25703.1	GBN25703.1
GBM90079.1	GBM90079.1
GBM86013.1	GBM86013.1
GBM73727.1	GBM73727.1
GBM61520.1	GBM61520.1
GBM15347.1	GBM15347.1
GBM08915.1	GBM08915.1
GBM08922.1	GBM08922.1
GEQ98665.1	GEQ98665.1
GBF29975.1	GBF29975.1
GBF31418.1	GBF31418.1
GES64628.1	GES64628.1
GES63952.1	GES63952.1
BBO82059.1	BBO82059.1
BBH45955.1	BBH45955.1
GET93405.1	GET93405.1
GET91426.1	GET91426.1
BBH15516.1	BBH15516.1
GFE13239.1	GFE13239.1
GFE77016.1	GFE77016.1
BBU31861.1	BBU31861.1
GFF56401.1	GFF56401.1
GFF32858.1	GFF32858.1
GFF80748.1	GFF80748.1
GFF57849.1	GFF57849.1
GFF46167.1	GFF46167.1
GFF35816.1	GFF35816.1
GFF23448.1	GFF23448.1
GFF62150.1	GFF62150.1
GFG62522.1	GFG62522.1
GFG88556.1	GFG88556.1
GFG56870.1	GFG56870.1
GFG81813.1	GFG81813.1
GFG54402.1	GFG54402.1
BBX05172.1	BBX05172.1
BBX10221.1	BBX10221.1
BBX28190.1	BBX28190.1
BBX43973.1	BBX43973.1
BBX57219.1	BBX57219.1
BBY19801.1	BBY19801.1
BBY21772.1	BBY21772.1
BBY46703.1	BBY46703.1
BBY93404.1	BBY93404.1
BCA54089.1	BCA54089.1
BCA54130.1	BCA54130.1
BCA27130.1	BCA27130.1
BCB20217.1	BCB20217.1
BCB21478.1	BCB21478.1
GFH39255.1	GFH39255.1
BCB75589.1	BCB75589.1
BCB83104.1	BCB83104.1
GEW99939.1	GEW99939.1
GEY33356.1	GEY33356.1
GEX93099.1	GEX93099.1
GEV41489.1	GEV41489.1
GEU62230.1	GEU62230.1
GEU28265.1	GEU28265.1
CAB75352.1	CAB75352.1
CAD62204.1	CAD62204.1
CAF31536.1	CAF31536.1
CAE22474.1	CAE22474.1
CAL76048.1	CAL76048.1
CAQ19344.1	CAQ19344.1
CBH25669.1	CBH25669.1
CBJ28002.1	CBJ28002.1
CBJ33402.1	CBJ33402.1
CCC93276.1	CCC93276.1
CCC86184.1	CCC86184.1
CBY15274.1	CBY15274.1
CBQ68668.1	CBQ68668.1
CCD52384.1	CCD52384.1
CCD52385.1	CCD52385.1
CCA67046.1	CCA67046.1
CCA77514.1	CCA77514.1
CCA74023.1	CCA74023.1
CCE83821.1	CCE83821.1
WP_009030739.1	WP_009030739.1
CCF42370.1	CCF42370.1
CCF35772.1	CCF35772.1
CCO37202.1	CCO37202.1
CCO36093.1	CCO36093.1
CCO35838.1	CCO35838.1
CCO34942.1	CCO34942.1
CCO35169.1	CCO35169.1
CCO33756.1	CCO33756.1
CCO28849.1	CCO28849.1
SEK78352.1	SEK78352.1
CDE85699.1	CDE85699.1
CCN36180.1	CCN36180.1
CCX34430.1	CCX34430.1
CDI74588.1	CDI74588.1
CCX06811.1	CCX06811.1
CDL84518.1	CDL84518.1
CCX04743.1	CCX04743.1
CCI11671.1	CCI11671.1
CCI45779.1	CCI45779.1
CDQ15784.1	CDQ15784.1
CCI11672.1	CCI11672.1
CDW52027.1	CDW52027.1
CDP28838.1	CDP28838.1
CDY31926.1	CDY31926.1
CEA14369.1	CEA14369.1
CDX13037.1	CDX13037.1
CDX17575.1	CDX17575.1
CDO73776.1	CDO73776.1
CDO69332.1	CDO69332.1
CDO78110.1	CDO78110.1
CDO69452.1	CDO69452.1
CEG79416.1	CEG79416.1
CKT64670.1	CKT64670.1
CEQ40723.1	CEQ40723.1
CRG92423.1	CRG92423.1
CDZ28070.1	CDZ28070.1
CDZ58493.1	CDZ58493.1
CRG87782.1	CRG87782.1
CEP01371.1	CEP01371.1
CEJ61458.1	CEJ61458.1
CDS82146.1	CDS82146.1
CEJ59488.1	CEJ59488.1
CEJ54782.1	CEJ54782.1
CEM39660.1	CEM39660.1
CEM21190.1	CEM21190.1
CEM01741.1	CEM01741.1
CPZ81533.1	CPZ81533.1
CPZ71924.1	CPZ71924.1
CRL23018.1	CRL23018.1
CRK22688.1	CRK22688.1
CRK33504.1	CRK33504.1
CRK16689.1	CRK16689.1
CRK20329.1	CRK20329.1
CRK38885.1	CRK38885.1
CRK12782.1	CRK12782.1
CEH16806.1	CEH16806.1
CEH16428.1	CEH16428.1
CEH15493.1	CEH15493.1
CEH11699.1	CEH11699.1
CUG79282.1	CUG79282.1
CUU73383.1	CUU73383.1
CUV64266.1	CUV64266.1
CUU00934.1	CUU00934.1
CEL11891.1	CEL11891.1
CEL01764.1	CEL01764.1
CUA89878.1	CUA89878.1
CDR88463.1	CDR88463.1
CVI11322.1	CVI11322.1
CZT37477.1	CZT37477.1
SAM00580.1	SAM00580.1
SAL99573.1	SAL99573.1
SAM09323.1	SAM09323.1
SBT06542.1	SBT06542.1
WP_065942841.1	WP_065942841.1
SCF37177.1	SCF37177.1
SDM19090.1	SDM19090.1
WP_092864050.1	WP_092864050.1
SDD82120.1	SDD82120.1
SDI31775.1	SDI31775.1
SDH67312.1	SDH67312.1
SDG59987.1	SDG59987.1
SDJ16694.1	SDJ16694.1
SDG56061.1	SDG56061.1
SDO18603.1	SDO18603.1
WP_176945916.1	WP_176945916.1
SDY70817.1	SDY70817.1
SDZ77129.1	SDZ77129.1
SDZ95279.1	SDZ95279.1
SEF27695.1	SEF27695.1
CZT07593.1	CZT07593.1
CZT12468.1	CZT12468.1
CZS90871.1	CZS90871.1
SEH25244.1	SEH25244.1
SEN00305.1	SEN00305.1
WP_175485678.1	WP_175485678.1
WP_170861189.1	WP_170861189.1
WP_169922349.1	WP_169922349.1
SFJ02390.1	SFJ02390.1
SFK83598.1	SFK83598.1
SFU19489.1	SFU19489.1
SFA82845.1	SFA82845.1
SFY09327.1	SFY09327.1
SHK24877.1	SHK24877.1
CRK97304.1	CRK97304.1
WP_073140792.1	WP_073140792.1
SHN29304.1	SHN29304.1
CZR58715.1	CZR58715.1
CZR52831.1	CZR52831.1
CVL11667.1	CVL11667.1
CVL04243.1	CVL04243.1
CVK87318.1	CVK87318.1
SIN85413.1	SIN85413.1
SIK88854.1	SIK88854.1
CED92030.1	CED92030.1
WP_076491458.1	WP_076491458.1
SJM60866.1	SJM60866.1
SKQ86952.1	SKQ86952.1
SLJ99178.1	SLJ99178.1
SMF11991.1	SMF11991.1
SMH42402.1	SMH42402.1
SLN56522.1	SLN56522.1
SMQ50867.1	SMQ50867.1
SBS72370.1	SBS72370.1
SMY20971.1	SMY20971.1
SMY22899.1	SMY22899.1
SMY23191.1	SMY23191.1
WP_179220736.1	WP_179220736.1
SCV74144.1	SCV74144.1
SJL14171.1	SJL14171.1
SJL12973.1	SJL12973.1
SJL12898.1	SJL12898.1
SJK98715.1	SJK98715.1
SMR53044.1	SMR53044.1
CUS14674.1	CUS14674.1
SOO30999.1	SOO30999.1
SPB50274.1	SPB50274.1
SPF56013.1	SPF56013.1
SPM30194.1	SPM30194.1
SPM40245.1	SPM40245.1
SQI40309.1	SQI40309.1
SQB21332.1	SQB21332.1
SPZ49552.1	SPZ49552.1
STV87585.1	STV87585.1
SOY75974.1	SOY75974.1
SUX53597.1	SUX53597.1
SYX84249.1	SYX84249.1
XP_034123752.1	XP_034123752.1
XP_034123755.1	XP_034123755.1
SPP78670.1	SPP78670.1
VBB78491.1	VBB78491.1
VDK56271.1	VDK56271.1
VDK67112.1	VDK67112.1
VDP27714.1	VDP27714.1
VDP23746.1	VDP23746.1
VEA71507.1	VEA71507.1
SPQ24852.1	SPQ24852.1
VFK00514.1	VFK00514.1
VFT14324.1	VFT14324.1
VFS03941.1	VFS03941.1
VPI01831.1	VPI01831.1
VVC97211.1	VVC97211.1
VVC96697.1	VVC96697.1
VVD01281.1	VVD01281.1
VVC98778.1	VVC98778.1
VVD04516.1	VVD04516.1
VVD04517.1	VVD04517.1
VDC05328.1	VDC05328.1
VDC04863.1	VDC04863.1
VDB94040.1	VDB94040.1
VVO03536.1	VVO03536.1
VVC43306.1	VVC43306.1
VVC41272.1	VVC41272.1
VVC33618.1	VVC33618.1
VVS91500.1	VVS91500.1
VVS98131.1	VVS98131.1
VVC31731.1	VVC31731.1
VWO94946.1	VWO94946.1
VWO94919.1	VWO94919.1
VWO94910.1	VWO94910.1
VWO96848.1	VWO96848.1
VWO98322.1	VWO98322.1
VWO99079.1	VWO99079.1
VWP01079.1	VWP01079.1
VVD33611.1	VVD33611.1
VEN57084.1	VEN57084.1
VEN57080.1	VEN57080.1
VEN58386.1	VEN58386.1
VEN57081.1	VEN57081.1
VEN54764.1	VEN54764.1
VEN47588.1	VEN47588.1
VEN50338.1	VEN50338.1
VEN35629.1	VEN35629.1
VEN34428.1	VEN34428.1
VXC32723.1	VXC32723.1
CAA7261241.1	CAA7261241.1
WP_173979331.1	WP_173979331.1
CAA7055523.1	CAA7055523.1
CAA7055524.1	CAA7055524.1
CAA7257392.1	CAA7257392.1
CAB0004706.1	CAB0004706.1
CAB0043381.1	CAB0043381.1
CAB1255797.1	CAB1255797.1
CAB1062311.1	CAB1062311.1
CAB0029222.1	CAB0029222.1
CAA9982781.1	CAA9982781.1
CAA9960527.1	CAA9960527.1
CAB1103127.1	CAB1103127.1
CAN93646.1	CAN93646.1
CBA28004.1	CBA28004.1
CCD42534.1	CCD42534.1
CCD44795.1	CCD44795.1
CCD52080.1	CCD52080.1
CCD52110.1	CCD52110.1
CCA73704.1	CCA73704.1
CCA75674.1	CCA75674.1
CCE97812.1	CCE97812.1
CCF34249.1	CCF34249.1
CCQ17350.1	CCQ17350.1
CCO36661.1	CCO36661.1
CCO35361.1	CCO35361.1
CCO31464.1	CCO31464.1
CCO29038.1	CCO29038.1
CCO29701.1	CCO29701.1
CCM15513.1	CCM15513.1
CCX16668.1	CCX16668.1
CCX33384.1	CCX33384.1
CCX31835.1	CCX31835.1
CCX04314.1	CCX04314.1
CDO87508.1	CDO87508.1
CCI45091.1	CCI45091.1
CDP07225.1	CDP07225.1
CDP31201.1	CDP31201.1
CDX20155.1	CDX20155.1
CDX43307.1	CDX43307.1
CDO71815.1	CDO71815.1
CDO68225.1	CDO68225.1
CDO72925.1	CDO72925.1
CEL58423.1	CEL58423.1
CKI41944.1	CKI41944.1
CQD23609.1	CQD23609.1
CDZ30145.1	CDZ30145.1
CDZ68243.1	CDZ68243.1
CDZ36015.1	CDZ36015.1
CDZ98695.1	CDZ98695.1
CEO96958.1	CEO96958.1
CRG92675.1	CRG92675.1
CEJ61424.1	CEJ61424.1
CEM30248.1	CEM30248.1
CEL98273.1	CEL98273.1
CPZ81518.1	CPZ81518.1
CRL23111.1	CRL23111.1
CRL20273.1	CRL20273.1
CRK13669.1	CRK13669.1
CRK04339.1	CRK04339.1
CRK24002.1	CRK24002.1
CUA68006.1	CUA68006.1
CUV64112.1	CUV64112.1
CEL10586.1	CEL10586.1
CEL03992.1	CEL03992.1
CEL06019.1	CEL06019.1
CEN60319.1	CEN60319.1
SAL53826.1	SAL53826.1
SAQ17509.1	SAQ17509.1
SBS40442.1	SBS40442.1
SCB58606.1	SCB58606.1
SCF66629.1	SCF66629.1
WP_069462698.1	WP_069462698.1
WP_175469464.1	WP_175469464.1
SDF35085.1	SDF35085.1
SDF65359.1	SDF65359.1
WP_175478389.1	WP_175478389.1
SDB32876.1	SDB32876.1
SEB86450.1	SEB86450.1
SEF26120.1	SEF26120.1
SED10438.1	SED10438.1
SEG71952.1	SEG71952.1
CZT11534.1	CZT11534.1
SEH19315.1	SEH19315.1
WP_177201027.1	WP_177201027.1
SFU56521.1	SFU56521.1
SFT80166.1	SFT80166.1
SFF24619.1	SFF24619.1
SCU76853.1	SCU76853.1
CRK94781.1	CRK94781.1
WP_172842128.1	WP_172842128.1
SHJ00768.1	SHJ00768.1
SHM91749.1	SHM91749.1
CZR68056.1	CZR68056.1
CZR66954.1	CZR66954.1
CZR61929.1	CZR61929.1
CZR51441.1	CZR51441.1
CZR56343.1	CZR56343.1
SIO70561.1	SIO70561.1
SIO64333.1	SIO64333.1
SIP97141.1	SIP97141.1
SKZ77141.1	SKZ77141.1
SMQ45631.1	SMQ45631.1
SBV34976.1	SBV34976.1
SMY23609.1	SMY23609.1
SNT10525.1	SNT10525.1
SNS59343.1	SNS59343.1
SJL13090.1	SJL13090.1
SJL10286.1	SJL10286.1
SJL08487.1	SJL08487.1
SCO58562.1	SCO58562.1
SCO88110.1	SCO88110.1
SCO81488.1	SCO81488.1
CUS14907.1	CUS14907.1
CUS09764.1	CUS09764.1
SMR55808.1	SMR55808.1
SMR62725.1	SMR62725.1
SPF48607.1	SPF48607.1
SPE38952.1	SPE38952.1
SPF57019.1	SPF57019.1
SQH33087.1	SQH33087.1
SPP98949.1	SPP98949.1
WP_181816125.1	WP_181816125.1
STW80275.1	STW80275.1
SUX55294.1	SUX55294.1
SUS04930.1	SUS04930.1
XP_034140099.1	XP_034140099.1
VBB73951.1	VBB73951.1
XP_034123761.1	XP_034123761.1
VDC82248.1	VDC82248.1
VDM84180.1	VDM84180.1
VDP25485.1	VDP25485.1
VEB35700.1	VEB35700.1
SPQ23341.1	SPQ23341.1
VAH04254.1	VAH04254.1
VTL97132.1	VTL97132.1
SVE92447.1	SVE92447.1
VVC97603.1	VVC97603.1
VVC97805.1	VVC97805.1
VVC95460.1	VVC95460.1
VVA89887.1	VVA89887.1
VDC04855.1	VDC04855.1
VDC00532.1	VDC00532.1
VDC03216.1	VDC03216.1
VDB95583.1	VDB95583.1
VVC33339.1	VVC33339.1
VVT14608.1	VVT14608.1
VEN41511.1	VEN41511.1
WP_173919664.1	WP_173919664.1
VWX32478.1	VWX32478.1
VTU26846.1	VTU26846.1
CAA7269422.1	CAA7269422.1
CAA7262085.1	CAA7262085.1
WP_173979997.1	WP_173979997.1
CAB0008978.1	CAB0008978.1
CAB0002790.1	CAB0002790.1
CAA9996000.1	CAA9996000.1
CAB0039516.1	CAB0039516.1
CAB0031109.1	CAB0031109.1
CAA9960811.1	CAA9960811.1
CAB1112527.1	CAB1112527.1
CAB1103128.1	CAB1103128.1
sp|Q5UPL2|YR135_MIMIV	sp|Q5UPL2|YR135_MIMIV
tr|A0A0H3KLY3|A0A0H3KLY3_BURM1	tr|A0A0H3KLY3|A0A0H3KLY3_BURM1
sp|P46371.1|YTH2_RHOER	sp|P46371.1|YTH2_RHOER
sp|Q5UQH8.1|YR833_MIMIV	sp|Q5UQH8.1|YR833_MIMIV
sp|Q3L1D1.1|PDH1_AGABI	sp|Q3L1D1.1|PDH1_AGABI
CEL64900.1	CEL64900.1
CEL73157.1	CEL73157.1
CEL77634.1	CEL77634.1
HAA11430.1	HAA11430.1
WP_052377038.1	WP_052377038.1
HAA78129.1	HAA78129.1
HAB37688.1	HAB37688.1
HAB47776.1	HAB47776.1
HAC18332.1	HAC18332.1
HAC62724.1	HAC62724.1
HAC59627.1	HAC59627.1
HAC35298.1	HAC35298.1
HAE03205.1	HAE03205.1
HAE33682.1	HAE33682.1
HAE09913.1	HAE09913.1
HAF01028.1	HAF01028.1
HAF38861.1	HAF38861.1
HAG46948.1	HAG46948.1
HAH66107.1	HAH66107.1
HAH66890.1	HAH66890.1
HAG95651.1	HAG95651.1
HAI25423.1	HAI25423.1
HAJ21488.1	HAJ21488.1
HAK53072.1	HAK53072.1
HAK29057.1	HAK29057.1
HAN36327.1	HAN36327.1
HAN35154.1	HAN35154.1
HAQ47160.1	HAQ47160.1
HAR55592.1	HAR55592.1
HAR09206.1	HAR09206.1
HAT50894.1	HAT50894.1
HAU42417.1	HAU42417.1
HAV35351.1	HAV35351.1
HAW16916.1	HAW16916.1
HAW37192.1	HAW37192.1
HBA39199.1	HBA39199.1
HBB34257.1	HBB34257.1
HBD12469.1	HBD12469.1
HBF29476.1	HBF29476.1
HBG08890.1	HBG08890.1
HBI03999.1	HBI03999.1
HBJ32069.1	HBJ32069.1
HBI48658.1	HBI48658.1
HBJ37903.1	HBJ37903.1
HBK11205.1	HBK11205.1
HBJ89292.1	HBJ89292.1
HBK55082.1	HBK55082.1
HBM54088.1	HBM54088.1
HBK89086.1	HBK89086.1
HBN30615.1	HBN30615.1
HBO91014.1	HBO91014.1
HBP20658.1	HBP20658.1
HBP68808.1	HBP68808.1
HBP68700.1	HBP68700.1
HBP72092.1	HBP72092.1
HBS27512.1	HBS27512.1
HBR51782.1	HBR51782.1
HBR61083.1	HBR61083.1
HBR65813.1	HBR65813.1
HBR65621.1	HBR65621.1
HBQ09839.1	HBQ09839.1
HBQ31873.1	HBQ31873.1
HBY61832.1	HBY61832.1
HBX70948.1	HBX70948.1
HCC57157.1	HCC57157.1
HCC55812.1	HCC55812.1
HCB76135.1	HCB76135.1
HCC96564.1	HCC96564.1
HBZ71632.1	HBZ71632.1
HCB41335.1	HCB41335.1
HCG28744.1	HCG28744.1
HCF29448.1	HCF29448.1
HCH57365.1	HCH57365.1
HCK61160.1	HCK61160.1
HCK60794.1	HCK60794.1
HCL64671.1	HCL64671.1
HCN65164.1	HCN65164.1
HCO03879.1	HCO03879.1
HCP39599.1	HCP39599.1
HCP96346.1	HCP96346.1
HCP47908.1	HCP47908.1
HCR12003.1	HCR12003.1
HCQ48038.1	HCQ48038.1
HCR66065.1	HCR66065.1
HCT39751.1	HCT39751.1
HCU85045.1	HCU85045.1
HCV25304.1	HCV25304.1
HCU88533.1	HCU88533.1
HCX00476.1	HCX00476.1
HCX82830.1	HCX82830.1
HDH08359.1	HDH08359.1
HDL48482.1	HDL48482.1
HEB51588.1	HEB51588.1
HEB86588.1	HEB86588.1
HDS05920.1	HDS05920.1
HDV37176.1	HDV37176.1
HEQ94145.1	HEQ94145.1
HEO69682.1	HEO69682.1
HEG69300.1	HEG69300.1
HEL18443.1	HEL18443.1
HET87612.1	HET87612.1
HES96682.1	HES96682.1
HEW89681.1	HEW89681.1
HET50019.1	HET50019.1
HEY44901.1	HEY44901.1
HGB06323.1	HGB06323.1
HGB06143.1	HGB06143.1
HFM67375.1	HFM67375.1
HFL76119.1	HFL76119.1
HFM40907.1	HFM40907.1
HGM99474.1	HGM99474.1
HFL67052.1	HFL67052.1
HFD80515.1	HFD80515.1
HFS85840.1	HFS85840.1
HHK74032.1	HHK74032.1
HHC08627.1	HHC08627.1
HHE64503.1	HHE64503.1
HGL90479.1	HGL90479.1
HGF01770.1	HGF01770.1
HHH46786.1	HHH46786.1
HGT55043.1	HGT55043.1
HHO52760.1	HHO52760.1
HHR99930.1	HHR99930.1
HHR99074.1	HHR99074.1
HAA35564.1	HAA35564.1
HAB38383.1	HAB38383.1
HAB68335.1	HAB68335.1
HAB78787.1	HAB78787.1
HAB75188.1	HAB75188.1
HAC91482.1	HAC91482.1
HAC35585.1	HAC35585.1
HAF41409.1	HAF41409.1
HAF37581.1	HAF37581.1
HAG46947.1	HAG46947.1
HAJ43015.1	HAJ43015.1
HAK61616.1	HAK61616.1
HAM03165.1	HAM03165.1
HAN31933.1	HAN31933.1
HAP46569.1	HAP46569.1
HAR03201.1	HAR03201.1
HAQ77661.1	HAQ77661.1
HAS10165.1	HAS10165.1
HAT56916.1	HAT56916.1
HAU93890.1	HAU93890.1
HAV14612.1	HAV14612.1
HAX74319.1	HAX74319.1
HAZ32950.1	HAZ32950.1
HBE67280.1	HBE67280.1
HBF00525.1	HBF00525.1
HBE99539.1	HBE99539.1
HBF13835.1	HBF13835.1
HBJ38459.1	HBJ38459.1
HBK21852.1	HBK21852.1
HBM59553.1	HBM59553.1
HBP21248.1	HBP21248.1
HBO91027.1	HBO91027.1
HBS36371.1	HBS36371.1
HBS27895.1	HBS27895.1
HBP86634.1	HBP86634.1
HBQ12622.1	HBQ12622.1
HBT33347.1	HBT33347.1
HBX47587.1	HBX47587.1
HCC59052.1	HCC59052.1
HCB75796.1	HCB75796.1
HCD49352.1	HCD49352.1
HCD49931.1	HCD49931.1
HCD17361.1	HCD17361.1
HCE28529.1	HCE28529.1
HBZ69738.1	HBZ69738.1
HBZ70620.1	HBZ70620.1
HCH55860.1	HCH55860.1
HCG70445.1	HCG70445.1
HCH23242.1	HCH23242.1
HCI88008.1	HCI88008.1
HCK13454.1	HCK13454.1
HCK19178.1	HCK19178.1
HCL10737.1	HCL10737.1
HCK81393.1	HCK81393.1
HCK94353.1	HCK94353.1
HCO46450.1	HCO46450.1
HCP38319.1	HCP38319.1
HCQ65604.1	HCQ65604.1
HCP45664.1	HCP45664.1
HCR00688.1	HCR00688.1
HCS90516.1	HCS90516.1
HCV39612.1	HCV39612.1
HCU94521.1	HCU94521.1
HCV56783.1	HCV56783.1
HDD42554.1	HDD42554.1
HDL16919.1	HDL16919.1
HEC01483.1	HEC01483.1
HDY04497.1	HDY04497.1
HEO48028.1	HEO48028.1
HEL44152.1	HEL44152.1
HEG70628.1	HEG70628.1
HEV44176.1	HEV44176.1
HET69252.1	HET69252.1
HEW03508.1	HEW03508.1
HEY50046.1	HEY50046.1
HGG59042.1	HGG59042.1
HGG60812.1	HGG60812.1
HGZ22550.1	HGZ22550.1
HFX65878.1	HFX65878.1
HFW33199.1	HFW33199.1
HGZ21954.1	HGZ21954.1
HGB08177.1	HGB08177.1
HGP77366.1	HGP77366.1
HFK20878.1	HFK20878.1
HFL02845.1	HFL02845.1
HGZ55351.1	HGZ55351.1
HFC05152.1	HFC05152.1
HHJ34569.1	HHJ34569.1
HFD40393.1	HFD40393.1
HGV09666.1	HGV09666.1
HHA38067.1	HHA38067.1
HGD63874.1	HGD63874.1
HGD63875.1	HGD63875.1
HHH73095.1	HHH73095.1
HGS84359.1	HGS84359.1
HGO42773.1	HGO42773.1
HHN81491.1	HHN81491.1
HHS89502.1	HHS89502.1
WP_136426656.1	WP_136426656.1
WP_048441515.1	WP_048441515.1
XP_020056195.1	XP_020056195.1
WP_002105509.1	WP_002105509.1
WP_075221448.1	WP_075221448.1
WP_092629951.1	WP_092629951.1
WP_006541708.1	WP_006541708.1
WP_078844133.1	WP_078844133.1
WP_072766314.1	WP_072766314.1
XP_025835780.1	XP_025835780.1
WP_060573548.1	WP_060573548.1
WP_013473840.1	WP_013473840.1
XP_011504679.1	XP_011504679.1
WP_113452061.1	WP_113452061.1
WP_127753351.1	WP_127753351.1
XP_021710657.1	XP_021710657.1
WP_050421358.1	WP_050421358.1
WP_083445307.1	WP_083445307.1
WP_116849265.1	WP_116849265.1
WP_076401143.1	WP_076401143.1
WP_135770135.1	WP_135770135.1
WP_014724532.1	WP_014724532.1
WP_090564063.1	WP_090564063.1
WP_014370804.1	WP_014370804.1
WP_135746465.1	WP_135746465.1
WP_012485471.1	WP_012485471.1
WP_092852580.1	WP_092852580.1
WP_051113306.1	WP_051113306.1
WP_088210235.1	WP_088210235.1
XP_007725768.1	XP_007725768.1
WP_138423240.1	WP_138423240.1
WP_050605798.1	WP_050605798.1
WP_114238547.1	WP_114238547.1
WP_056381471.1	WP_056381471.1
XP_019758561.1	XP_019758561.1
WP_025600852.1	WP_025600852.1
WP_110751189.1	WP_110751189.1
XP_031623371.1	XP_031623371.1
WP_021474676.1	WP_021474676.1
WP_012978654.1	WP_012978654.1
WP_121968889.1	WP_121968889.1
XP_026694760.1	XP_026694760.1
WP_033287647.1	WP_033287647.1
XP_018017812.1	XP_018017812.1
WP_113480335.1	WP_113480335.1
XP_007381022.1	XP_007381022.1
WP_127883229.1	WP_127883229.1
WP_055890090.1	WP_055890090.1
WP_037126208.1	WP_037126208.1
XP_001840660.1	XP_001840660.1
WP_119082136.1	WP_119082136.1
WP_133595183.1	WP_133595183.1
XP_004933796.2	XP_004933796.2
WP_066013852.1	WP_066013852.1
WP_133436569.1	WP_133436569.1
WP_127413102.1	WP_127413102.1
WP_062115722.1	WP_062115722.1
WP_158932294.1	WP_158932294.1
WP_033036327.1	WP_033036327.1
XP_011051127.1	XP_011051127.1
WP_125806635.1	WP_125806635.1
XP_024337698.1	XP_024337698.1
WP_126211260.1	WP_126211260.1
XP_031338848.1	XP_031338848.1
WP_162579278.1	WP_162579278.1
WP_152201749.1	WP_152201749.1
WP_089743961.1	WP_089743961.1
WP_135155072.1	WP_135155072.1
XP_017491935.1	XP_017491935.1
WP_158645046.1	WP_158645046.1
WP_038901234.1	WP_038901234.1
XP_008727723.1	XP_008727723.1
WP_160121046.1	WP_160121046.1
WP_053233662.1	WP_053233662.1
WP_022718628.1	WP_022718628.1
XP_018017483.1	XP_018017483.1
WP_160097291.1	WP_160097291.1
XP_018566941.1	XP_018566941.1
WP_120311404.1	WP_120311404.1
WP_075214091.1	WP_075214091.1
XP_019874293.1	XP_019874293.1
XP_023090880.1	XP_023090880.1
WP_084952494.1	WP_084952494.1
XP_014280954.1	XP_014280954.1
XP_024534777.1	XP_024534777.1
WP_000031206.1	WP_000031206.1
WP_149499401.1	WP_149499401.1
WP_081620559.1	WP_081620559.1
WP_090962691.1	WP_090962691.1
WP_165703698.1	WP_165703698.1
XP_031369714.1	XP_031369714.1
WP_056609778.1	WP_056609778.1
WP_052230673.1	WP_052230673.1
WP_034419749.1	WP_034419749.1
WP_109924638.1	WP_109924638.1
XP_011644944.1	XP_011644944.1
WP_029475308.1	WP_029475308.1
XP_028510520.1	XP_028510520.1
XP_023011601.1	XP_023011601.1
XP_007770301.1	XP_007770301.1
WP_008649218.1	WP_008649218.1
WP_114941432.1	WP_114941432.1
WP_127384266.1	WP_127384266.1
XP_012252169.1	XP_012252169.1
WP_128795260.1	WP_128795260.1
XP_024085431.1	XP_024085431.1
WP_028720139.1	WP_028720139.1
WP_138744933.1	WP_138744933.1
WP_114559755.1	WP_114559755.1
WP_149104255.1	WP_149104255.1
WP_006945622.1	WP_006945622.1
WP_079300062.1	WP_079300062.1
WP_051415460.1	WP_051415460.1
XP_018896597.1	XP_018896597.1
WP_161657595.1	WP_161657595.1
XP_001791201.1	XP_001791201.1
WP_065706043.1	WP_065706043.1
WP_055814730.1	WP_055814730.1
XP_014252418.1	XP_014252418.1
WP_033166460.1	WP_033166460.1
WP_033078637.1	WP_033078637.1
WP_047315267.1	WP_047315267.1
WP_108783587.1	WP_108783587.1
XP_016766315.1	XP_016766315.1
WP_069316915.1	WP_069316915.1
WP_051476407.1	WP_051476407.1
WP_138168151.1	WP_138168151.1
WP_166012017.1	WP_166012017.1
WP_165867646.1	WP_165867646.1
WP_121023413.1	WP_121023413.1
WP_155773069.1	WP_155773069.1
WP_071098365.1	WP_071098365.1
WP_145244691.1	WP_145244691.1
WP_003449841.1	WP_003449841.1
WP_090660046.1	WP_090660046.1
WP_166603178.1	WP_166603178.1
WP_157248147.1	WP_157248147.1
XP_021000174.1	XP_021000174.1
XP_030033985.1	XP_030033985.1
XP_018019983.1	XP_018019983.1
XP_018689830.1	XP_018689830.1
WP_163916260.1	WP_163916260.1
XP_031878501.1	XP_031878501.1
XP_015432413.1	XP_015432413.1
XP_011560392.1	XP_011560392.1
WP_046090972.1	WP_046090972.1
WP_080615881.1	WP_080615881.1
XP_019618648.1	XP_019618648.1
XP_003043379.1	XP_003043379.1
WP_144834027.1	WP_144834027.1
WP_120201705.1	WP_120201705.1
WP_137775132.1	WP_137775132.1
WP_032125772.1	WP_032125772.1
WP_123509449.1	WP_123509449.1
WP_084396596.1	WP_084396596.1
XP_007697678.1	XP_007697678.1
WP_006228587.1	WP_006228587.1
XP_023214262.1	XP_023214262.1
XP_031765752.1	XP_031765752.1
WP_107867052.1	WP_107867052.1
XP_013270384.1	XP_013270384.1
WP_058478821.1	WP_058478821.1
WP_096648035.1	WP_096648035.1
WP_037448973.1	WP_037448973.1
WP_039160659.1	WP_039160659.1
WP_157034272.1	WP_157034272.1
WP_114834088.1	WP_114834088.1
WP_050407795.1	WP_050407795.1
WP_066744244.1	WP_066744244.1
XP_627167.1	XP_627167.1
XP_021195903.1	XP_021195903.1
WP_078201573.1	WP_078201573.1
WP_120525456.1	WP_120525456.1
WP_069159770.1	WP_069159770.1
WP_006974483.1	WP_006974483.1
WP_099790868.1	WP_099790868.1
WP_092774852.1	WP_092774852.1
WP_008545086.1	WP_008545086.1
WP_109461212.1	WP_109461212.1
XP_016626992.1	XP_016626992.1
XP_001933147.1	XP_001933147.1
WP_056038893.1	WP_056038893.1
XP_029753350.1	XP_029753350.1
XP_021944254.1	XP_021944254.1
WP_153457349.1	WP_153457349.1
XP_014248523.1	XP_014248523.1
WP_133707736.1	WP_133707736.1
WP_143015327.1	WP_143015327.1
WP_069574450.1	WP_069574450.1
WP_167313543.1	WP_167313543.1
XP_007917530.1	XP_007917530.1
WP_109657218.1	WP_109657218.1
WP_119254751.1	WP_119254751.1
WP_107676337.1	WP_107676337.1
WP_060575637.1	WP_060575637.1
WP_054265431.1	WP_054265431.1
XP_009551942.1	XP_009551942.1
WP_139345722.1	WP_139345722.1
WP_132283778.1	WP_132283778.1
XP_559704.2	XP_559704.2
WP_075740171.1	WP_075740171.1
WP_144908014.1	WP_144908014.1
WP_162738858.1	WP_162738858.1
XP_026677969.1	XP_026677969.1
WP_158928121.1	WP_158928121.1
XP_031636377.1	XP_031636377.1
WP_006132857.1	WP_006132857.1
XP_022125326.1	XP_022125326.1
XP_027854504.1	XP_027854504.1
WP_051478972.1	WP_051478972.1
WP_084269794.1	WP_084269794.1
WP_121047831.1	WP_121047831.1
WP_090030597.1	WP_090030597.1
WP_066390392.1	WP_066390392.1
XP_006455306.1	XP_006455306.1
WP_046089588.1	WP_046089588.1
WP_070391782.1	WP_070391782.1
WP_026936863.1	WP_026936863.1
XP_027205929.1	XP_027205929.1
WP_154449137.1	WP_154449137.1
XP_004933918.1	XP_004933918.1
WP_106922568.1	WP_106922568.1
WP_044506156.1	WP_044506156.1
WP_108440386.1	WP_108440386.1
WP_162719604.1	WP_162719604.1
XP_018161831.1	XP_018161831.1
WP_143161331.1	WP_143161331.1
WP_112106651.1	WP_112106651.1
WP_059153397.1	WP_059153397.1
WP_057820648.1	WP_057820648.1
WP_099513365.1	WP_099513365.1
WP_099622606.1	WP_099622606.1
WP_159394980.1	WP_159394980.1
WP_051313366.1	WP_051313366.1
WP_009451190.1	WP_009451190.1
WP_090229251.1	WP_090229251.1
XP_629786.1	XP_629786.1
XP_013947610.1	XP_013947610.1
WP_139651716.1	WP_139651716.1
WP_162727280.1	WP_162727280.1
XP_003286141.1	XP_003286141.1
XP_014082213.1	XP_014082213.1
WP_156218259.1	WP_156218259.1
XP_013314697.1	XP_013314697.1
WP_107446936.1	WP_107446936.1
WP_160765649.1	WP_160765649.1
WP_100716201.1	WP_100716201.1
XP_026762381.1	XP_026762381.1
WP_145198900.1	WP_145198900.1
XP_016758099.1	XP_016758099.1
WP_023807599.1	WP_023807599.1
WP_093160346.1	WP_093160346.1
WP_084280363.1	WP_084280363.1
WP_060985161.1	WP_060985161.1
WP_083543466.1	WP_083543466.1
WP_158764723.1	WP_158764723.1
WP_114463936.1	WP_114463936.1
WP_097600913.1	WP_097600913.1
WP_159792595.1	WP_159792595.1
YP_008318875.1	YP_008318875.1
XP_031637431.1	XP_031637431.1
WP_138007430.1	WP_138007430.1
WP_107815284.1	WP_107815284.1
WP_104200349.1	WP_104200349.1
WP_137127319.1	WP_137127319.1
WP_140855202.1	WP_140855202.1
WP_074654361.1	WP_074654361.1
WP_136934784.1	WP_136934784.1
WP_154011388.1	WP_154011388.1
WP_149480741.1	WP_149480741.1
WP_155564503.1	WP_155564503.1
XP_007381270.1	XP_007381270.1
WP_139315194.1	WP_139315194.1
XP_004335834.1	XP_004335834.1
XP_018580307.1	XP_018580307.1
WP_148846913.1	WP_148846913.1
WP_144208332.1	WP_144208332.1
XP_032528003.1	XP_032528003.1
XP_008871240.1	XP_008871240.1
WP_166995580.1	WP_166995580.1
WP_106747437.1	WP_106747437.1
XP_026813131.1	XP_026813131.1
WP_155493406.1	WP_155493406.1
WP_155614582.1	WP_155614582.1
WP_055527473.1	WP_055527473.1
XP_021961775.1	XP_021961775.1
WP_083215821.1	WP_083215821.1
WP_159008092.1	WP_159008092.1
XP_019868173.1	XP_019868173.1
WP_068277827.1	WP_068277827.1
XP_031634957.1	XP_031634957.1
WP_094920500.1	WP_094920500.1
WP_101518750.1	WP_101518750.1
WP_163959181.1	WP_163959181.1
WP_166999687.1	WP_166999687.1
WP_081912186.1	WP_081912186.1
WP_081493010.1	WP_081493010.1
WP_114287924.1	WP_114287924.1
WP_145709013.1	WP_145709013.1
WP_106285819.1	WP_106285819.1
XP_007830438.1	XP_007830438.1
WP_055720424.1	WP_055720424.1
WP_105167291.1	WP_105167291.1
WP_091352078.1	WP_091352078.1
WP_161048061.1	WP_161048061.1
WP_116929431.1	WP_116929431.1
WP_109365620.1	WP_109365620.1
WP_166986933.1	WP_166986933.1
WP_106255288.1	WP_106255288.1
XP_021198748.1	XP_021198748.1
WP_163993074.1	WP_163993074.1
WP_102219215.1	WP_102219215.1
WP_140694793.1	WP_140694793.1
XP_011390799.1	XP_011390799.1
XP_014179288.1	XP_014179288.1
WP_081606560.1	WP_081606560.1
WP_061044729.1	WP_061044729.1
XP_007317230.1	XP_007317230.1
WP_143948861.1	WP_143948861.1
WP_052180067.1	WP_052180067.1
WP_055925555.1	WP_055925555.1
WP_125004601.1	WP_125004601.1
WP_012496722.1	WP_012496722.1
XP_024940757.1	XP_024940757.1
WP_051371786.1	WP_051371786.1
WP_061561781.1	WP_061561781.1
WP_124542212.1	WP_124542212.1
WP_163916262.1	WP_163916262.1
WP_077024426.1	WP_077024426.1
WP_106546348.1	WP_106546348.1
WP_135508586.1	WP_135508586.1
XP_014160647.1	XP_014160647.1
WP_066144613.1	WP_066144613.1
XP_020128959.1	XP_020128959.1
WP_165440553.1	WP_165440553.1
WP_010079256.1	WP_010079256.1
WP_017749551.1	WP_017749551.1
WP_088311003.1	WP_088311003.1
XP_019004656.1	XP_019004656.1
WP_115422272.1	WP_115422272.1
WP_090879720.1	WP_090879720.1
WP_060148042.1	WP_060148042.1
WP_132324827.1	WP_132324827.1
XP_007827251.1	XP_007827251.1
WP_157043444.1	WP_157043444.1
XP_009269975.1	XP_009269975.1
WP_090578087.1	WP_090578087.1
WP_142898529.1	WP_142898529.1
WP_160356594.1	WP_160356594.1
WP_073204248.1	WP_073204248.1
WP_163848983.1	WP_163848983.1
WP_111495169.1	WP_111495169.1
XP_007764427.1	XP_007764427.1
XP_020126408.1	XP_020126408.1
XP_015783817.1	XP_015783817.1
WP_112848890.1	WP_112848890.1
WP_008928298.1	WP_008928298.1
WP_051942456.1	WP_051942456.1
WP_113105851.1	WP_113105851.1
WP_133328923.1	WP_133328923.1
WP_140455468.1	WP_140455468.1
XP_028138197.1	XP_028138197.1
WP_076862214.1	WP_076862214.1
XP_026685541.1	XP_026685541.1
XP_014487347.1	XP_014487347.1
XP_016628892.1	XP_016628892.1
WP_045877953.1	WP_045877953.1
WP_139148542.1	WP_139148542.1
XP_022499740.1	XP_022499740.1
XP_015523497.1	XP_015523497.1
WP_159510543.1	WP_159510543.1
XP_021962176.1	XP_021962176.1
WP_145206908.1	WP_145206908.1
WP_167090441.1	WP_167090441.1
XP_011131209.1	XP_011131209.1
XP_021380040.1	XP_021380040.1
XP_009532273.1	XP_009532273.1
WP_126888740.1	WP_126888740.1
XP_029680079.1	XP_029680079.1
WP_140801351.1	WP_140801351.1
XP_001883897.1	XP_001883897.1
WP_148307949.1	WP_148307949.1
XP_030021022.1	XP_030021022.1
XP_006430150.1	XP_006430150.1
WP_089159096.1	WP_089159096.1
XP_002109314.1	XP_002109314.1
WP_166576774.1	WP_166576774.1
XP_026291832.1	XP_026291832.1
WP_152043069.1	WP_152043069.1
XP_008095599.1	XP_008095599.1
WP_166814619.1	WP_166814619.1
WP_097794379.1	WP_097794379.1
WP_094446065.1	WP_094446065.1
WP_064241942.1	WP_064241942.1
WP_088899185.1	WP_088899185.1
XP_004923716.2	XP_004923716.2
XP_007824242.2	XP_007824242.2
XP_023223162.1	XP_023223162.1
WP_100812317.1	WP_100812317.1
WP_096907527.1	WP_096907527.1
XP_021947080.1	XP_021947080.1
WP_020927603.1	WP_020927603.1
WP_121552784.1	WP_121552784.1
WP_062603509.1	WP_062603509.1
XP_019769852.1	XP_019769852.1
WP_033455226.1	WP_033455226.1
WP_087910600.1	WP_087910600.1
WP_081651975.1	WP_081651975.1
XP_007809819.1	XP_007809819.1
XP_007333550.1	XP_007333550.1
WP_080058430.1	WP_080058430.1
WP_046576939.1	WP_046576939.1
XP_030566709.1	XP_030566709.1
WP_130036370.1	WP_130036370.1
WP_069748021.1	WP_069748021.1
WP_075011158.1	WP_075011158.1
WP_039319846.1	WP_039319846.1
XP_024216875.1	XP_024216875.1
WP_116208126.1	WP_116208126.1
XP_014679844.1	XP_014679844.1
WP_166553704.1	WP_166553704.1
WP_063894615.1	WP_063894615.1
XP_018572219.1	XP_018572219.1
WP_073974158.1	WP_073974158.1
XP_015511625.1	XP_015511625.1
WP_143172892.1	WP_143172892.1
WP_084102886.1	WP_084102886.1
XP_025581367.1	XP_025581367.1
WP_030662896.1	WP_030662896.1
WP_146428985.1	WP_146428985.1
WP_127748960.1	WP_127748960.1
WP_127298006.1	WP_127298006.1
WP_002766881.1	WP_002766881.1
XP_022165757.1	XP_022165757.1
WP_012166320.1	WP_012166320.1
WP_126845054.1	WP_126845054.1
WP_142701418.1	WP_142701418.1
WP_050485578.1	WP_050485578.1
WP_157982009.1	WP_157982009.1
WP_015225904.1	WP_015225904.1
WP_052453523.1	WP_052453523.1
WP_112990436.1	WP_112990436.1
XP_022830931.1	XP_022830931.1
WP_042226716.1	WP_042226716.1
WP_127611862.1	WP_127611862.1
XP_030997133.1	XP_030997133.1
XP_500864.1	XP_500864.1
XP_011439691.1	XP_011439691.1
WP_160003387.1	WP_160003387.1
WP_113526684.1	WP_113526684.1
WP_167365044.1	WP_167365044.1
WP_137681669.1	WP_137681669.1
WP_132669162.1	WP_132669162.1
WP_131264469.1	WP_131264469.1
XP_024743770.1	XP_024743770.1
WP_056628491.1	WP_056628491.1
WP_131243327.1	WP_131243327.1
WP_110320307.1	WP_110320307.1
WP_130978014.1	WP_130978014.1
WP_140941359.1	WP_140941359.1
WP_146981840.1	WP_146981840.1
WP_131494106.1	WP_131494106.1
WP_161006183.1	WP_161006183.1
XP_013338896.1	XP_013338896.1
XP_022648744.1	XP_022648744.1
WP_103413654.1	WP_103413654.1
WP_158485150.1	WP_158485150.1
WP_159618203.1	WP_159618203.1
WP_120561831.1	WP_120561831.1
XP_014359176.1	XP_014359176.1
XP_013096412.1	XP_013096412.1
WP_137858199.1	WP_137858199.1
WP_119254915.1	WP_119254915.1
WP_127871926.1	WP_127871926.1
XP_002141916.1	XP_002141916.1
WP_068140435.1	WP_068140435.1
WP_111467354.1	WP_111467354.1
XP_013760091.1	XP_013760091.1
WP_037078996.1	WP_037078996.1
XP_007301607.1	XP_007301607.1
WP_022897329.1	WP_022897329.1
WP_164658457.1	WP_164658457.1
WP_161121996.1	WP_161121996.1
WP_114197743.1	WP_114197743.1
WP_045216664.1	WP_045216664.1
XP_007308788.1	XP_007308788.1
WP_080939394.1	WP_080939394.1
WP_159471399.1	WP_159471399.1
WP_086934337.1	WP_086934337.1
XP_023706970.1	XP_023706970.1
XP_023234377.1	XP_023234377.1
WP_152351323.1	WP_152351323.1
WP_160774355.1	WP_160774355.1
WP_083507799.1	WP_083507799.1
WP_067962174.1	WP_067962174.1
XP_006461320.1	XP_006461320.1
WP_105459951.1	WP_105459951.1
WP_005859391.1	WP_005859391.1
XP_018139346.1	XP_018139346.1
WP_106457489.1	WP_106457489.1
WP_140960140.1	WP_140960140.1
WP_133199010.1	WP_133199010.1
XP_014208795.2	XP_014208795.2
WP_146879220.1	WP_146879220.1
WP_135255700.1	WP_135255700.1
WP_133985392.1	WP_133985392.1
WP_071044296.1	WP_071044296.1
WP_150045252.1	WP_150045252.1
XP_031636920.1	XP_031636920.1
WP_099938339.1	WP_099938339.1
WP_117291365.1	WP_117291365.1
WP_054774560.1	WP_054774560.1
WP_138487591.1	WP_138487591.1
WP_072596225.1	WP_072596225.1
WP_051701275.1	WP_051701275.1
XP_031330235.1	XP_031330235.1
XP_024336379.1	XP_024336379.1
XP_014288634.1	XP_014288634.1
XP_028499558.1	XP_028499558.1
XP_014183565.1	XP_014183565.1
XP_007311168.1	XP_007311168.1
WP_156103324.1	WP_156103324.1
WP_078952473.1	WP_078952473.1
XP_001397016.2	XP_001397016.2
XP_008088461.1	XP_008088461.1
XP_022197321.1	XP_022197321.1
WP_063693775.1	WP_063693775.1
WP_106744514.1	WP_106744514.1
WP_084504810.1	WP_084504810.1
WP_058731181.1	WP_058731181.1
WP_128302969.1	WP_128302969.1
XP_015597063.1	XP_015597063.1
XP_025832466.1	XP_025832466.1
WP_142443834.1	WP_142443834.1
XP_028169255.1	XP_028169255.1
WP_068113013.1	WP_068113013.1
WP_132458466.1	WP_132458466.1
WP_153651604.1	WP_153651604.1
XP_660308.1	XP_660308.1
XP_021955361.1	XP_021955361.1
XP_001276380.1	XP_001276380.1
WP_046592344.1	WP_046592344.1
WP_079365186.1	WP_079365186.1
WP_146454055.1	WP_146454055.1
XP_014681678.1	XP_014681678.1
WP_156600563.1	WP_156600563.1
WP_118074384.1	WP_118074384.1
YP_007354600.1	YP_007354600.1
WP_015067663.1	WP_015067663.1
WP_166987080.1	WP_166987080.1
XP_029718589.1	XP_029718589.1
WP_006997060.1	WP_006997060.1
XP_018571566.1	XP_018571566.1
WP_083611207.1	WP_083611207.1
WP_115713012.1	WP_115713012.1
WP_020694256.1	WP_020694256.1
WP_137860159.1	WP_137860159.1
WP_018416516.1	WP_018416516.1
WP_091057183.1	WP_091057183.1
XP_025099044.1	XP_025099044.1
WP_164921822.1	WP_164921822.1
WP_005936787.1	WP_005936787.1
XP_009843984.1	XP_009843984.1
WP_013998825.1	WP_013998825.1
WP_090746201.1	WP_090746201.1
WP_111575957.1	WP_111575957.1
WP_113953438.1	WP_113953438.1
WP_155535545.1	WP_155535545.1
WP_160148791.1	WP_160148791.1
WP_062094981.1	WP_062094981.1
WP_052041643.1	WP_052041643.1
WP_167326414.1	WP_167326414.1
WP_093004989.1	WP_093004989.1
XP_020119813.1	XP_020119813.1
XP_030036531.1	XP_030036531.1
WP_133061151.1	WP_133061151.1
XP_030758496.1	XP_030758496.1
XP_025394716.1	XP_025394716.1
WP_031278423.1	WP_031278423.1
WP_167368688.1	WP_167368688.1
XP_027211315.1	XP_027211315.1
WP_060359350.1	WP_060359350.1
XP_023243826.1	XP_023243826.1
WP_096684185.1	WP_096684185.1
XP_020433897.1	XP_020433897.1
WP_135921823.1	WP_135921823.1
WP_112502716.1	WP_112502716.1
WP_134332634.1	WP_134332634.1
WP_153610798.1	WP_153610798.1
WP_157121269.1	WP_157121269.1
WP_151662515.1	WP_151662515.1
WP_120006562.1	WP_120006562.1
WP_059511040.1	WP_059511040.1
WP_123602013.1	WP_123602013.1
WP_091728304.1	WP_091728304.1
WP_150969445.1	WP_150969445.1
WP_127875732.1	WP_127875732.1
WP_091149131.1	WP_091149131.1
XP_030761733.1	XP_030761733.1
WP_112444747.1	WP_112444747.1
XP_026314146.1	XP_026314146.1
WP_153822750.1	WP_153822750.1
WP_157811972.1	WP_157811972.1
WP_060252711.1	WP_060252711.1
WP_159170599.1	WP_159170599.1
XP_001800211.1	XP_001800211.1
XP_005175833.2	XP_005175833.2
WP_128235190.1	WP_128235190.1
XP_020267026.1	XP_020267026.1
WP_066847660.1	WP_066847660.1
WP_166462768.1	WP_166462768.1
XP_022652666.1	XP_022652666.1
WP_162910248.1	WP_162910248.1
WP_107568917.1	WP_107568917.1
XP_023014616.1	XP_023014616.1
WP_083844744.1	WP_083844744.1
WP_020769816.1	WP_020769816.1
WP_110582380.1	WP_110582380.1
XP_029760748.1	XP_029760748.1
XP_021370229.1	XP_021370229.1
XP_022901080.1	XP_022901080.1
WP_114685871.1	WP_114685871.1
WP_037266387.1	WP_037266387.1
XP_027177652.1	XP_027177652.1
WP_005144084.1	WP_005144084.1
WP_119744645.1	WP_119744645.1
XP_008487392.2	XP_008487392.2
WP_143615603.1	WP_143615603.1
XP_022711601.1	XP_022711601.1
WP_130612054.1	WP_130612054.1
WP_101715224.1	WP_101715224.1
WP_095866069.1	WP_095866069.1
XP_011565122.1	XP_011565122.1
XP_002607312.1	XP_002607312.1
WP_081987799.1	WP_081987799.1
WP_012286964.1	WP_012286964.1
WP_119696169.1	WP_119696169.1
WP_088954043.1	WP_088954043.1
XP_016227357.1	XP_016227357.1
XP_018987755.1	XP_018987755.1
WP_037752107.1	WP_037752107.1
WP_161810927.1	WP_161810927.1
WP_103514751.1	WP_103514751.1
WP_095677773.1	WP_095677773.1
WP_068740862.1	WP_068740862.1
WP_164435736.1	WP_164435736.1
WP_119956675.1	WP_119956675.1
WP_143652006.1	WP_143652006.1
WP_165403902.1	WP_165403902.1
WP_008968129.1	WP_008968129.1
WP_088146449.1	WP_088146449.1
XP_013255147.1	XP_013255147.1
WP_037454320.1	WP_037454320.1
WP_100931252.1	WP_100931252.1
XP_028490337.1	XP_028490337.1
XP_019868106.1	XP_019868106.1
WP_081924144.1	WP_081924144.1
XP_001797048.1	XP_001797048.1
XP_031890794.1	XP_031890794.1
WP_068327286.1	WP_068327286.1
WP_144748497.1	WP_144748497.1
XP_009266708.1	XP_009266708.1
XP_026286611.1	XP_026286611.1
WP_130282702.1	WP_130282702.1
XP_021947812.1	XP_021947812.1
WP_083930378.1	WP_083930378.1
WP_100784609.1	WP_100784609.1
XP_015766210.1	XP_015766210.1
WP_157081275.1	WP_157081275.1
XP_026730746.1	XP_026730746.1
XP_003334851.1	XP_003334851.1
WP_133719972.1	WP_133719972.1
WP_151120504.1	WP_151120504.1
WP_152708584.1	WP_152708584.1
WP_082621168.1	WP_082621168.1
WP_055900862.1	WP_055900862.1
XP_013435736.1	XP_013435736.1
XP_007401636.1	XP_007401636.1
XP_026692202.1	XP_026692202.1
XP_002910135.1	XP_002910135.1
XP_001867688.1	XP_001867688.1
XP_008486944.1	XP_008486944.1
XP_007400105.1	XP_007400105.1
XP_021964220.1	XP_021964220.1
WP_137949765.1	WP_137949765.1
WP_022697275.1	WP_022697275.1
WP_089325778.1	WP_089325778.1
XP_017462119.1	XP_017462119.1
XP_005108386.1	XP_005108386.1
XP_001848852.1	XP_001848852.1
WP_076514419.1	WP_076514419.1
XP_007382608.1	XP_007382608.1
XP_011547852.1	XP_011547852.1
WP_066815540.1	WP_066815540.1
WP_116610391.1	WP_116610391.1
WP_032125678.1	WP_032125678.1
WP_165638013.1	WP_165638013.1
WP_167080999.1	WP_167080999.1
WP_114583301.1	WP_114583301.1
WP_136587634.1	WP_136587634.1
WP_121704489.1	WP_121704489.1
WP_124586422.1	WP_124586422.1
WP_047983402.1	WP_047983402.1
XP_004338136.1	XP_004338136.1
WP_101460056.1	WP_101460056.1
WP_133531160.1	WP_133531160.1
NP_001155085.1	NP_001155085.1
XP_015182812.1	XP_015182812.1
WP_108283378.1	WP_108283378.1
XP_014677341.1	XP_014677341.1
WP_142592177.1	WP_142592177.1
XP_031865251.1	XP_031865251.1
WP_054261974.1	WP_054261974.1
WP_115745409.1	WP_115745409.1
XP_023454649.1	XP_023454649.1
WP_137855068.1	WP_137855068.1
WP_020406400.1	WP_020406400.1
XP_008095566.1	XP_008095566.1
XP_003436606.1	XP_003436606.1
XP_025262777.1	XP_025262777.1
WP_093197437.1	WP_093197437.1
XP_002372840.1	XP_002372840.1
WP_146144273.1	WP_146144273.1
XP_013105627.1	XP_013105627.1
WP_087068340.1	WP_087068340.1
WP_034330061.1	WP_034330061.1
WP_165396492.1	WP_165396492.1
WP_023800498.1	WP_023800498.1
XP_021803979.1	XP_021803979.1
WP_142942404.1	WP_142942404.1
WP_166016819.1	WP_166016819.1
WP_114630495.1	WP_114630495.1
WP_154160819.1	WP_154160819.1
WP_068336471.1	WP_068336471.1
WP_162804051.1	WP_162804051.1
WP_144904071.1	WP_144904071.1
WP_058938536.1	WP_058938536.1
WP_022979977.1	WP_022979977.1
WP_057439818.1	WP_057439818.1
WP_159935964.1	WP_159935964.1
XP_023946547.1	XP_023946547.1
WP_140469546.1	WP_140469546.1
WP_039857767.1	WP_039857767.1
WP_142640259.1	WP_142640259.1
WP_162827125.1	WP_162827125.1
XP_031022773.1	XP_031022773.1
WP_020378462.1	WP_020378462.1
XP_021198749.1	XP_021198749.1
WP_102331350.1	WP_102331350.1
XP_012558802.1	XP_012558802.1
XP_031024806.1	XP_031024806.1
WP_106091526.1	WP_106091526.1
WP_044317981.1	WP_044317981.1
XP_026497969.1	XP_026497969.1
WP_080807201.1	WP_080807201.1
XP_019769934.1	XP_019769934.1
WP_156352074.1	WP_156352074.1
WP_086606510.1	WP_086606510.1
XP_013105606.1	XP_013105606.1
WP_030150942.1	WP_030150942.1
WP_128726959.1	WP_128726959.1
XP_018638193.1	XP_018638193.1
WP_091162400.1	WP_091162400.1
WP_133543184.1	WP_133543184.1
WP_111729439.1	WP_111729439.1
XP_007676724.1	XP_007676724.1
XP_018388856.1	XP_018388856.1
WP_137178948.1	WP_137178948.1
XP_028967846.1	XP_028967846.1
XP_021953452.1	XP_021953452.1
XP_015514722.1	XP_015514722.1
WP_132490271.1	WP_132490271.1
XP_011183091.1	XP_011183091.1
WP_135076069.1	WP_135076069.1
XP_031764420.1	XP_031764420.1
WP_087573852.1	WP_087573852.1
XP_007769936.1	XP_007769936.1
XP_002429704.1	XP_002429704.1
WP_103683531.1	WP_103683531.1
WP_028967647.1	WP_028967647.1
WP_063897552.1	WP_063897552.1
WP_167464677.1	WP_167464677.1
WP_045476369.1	WP_045476369.1
WP_082013366.1	WP_082013366.1
WP_132401972.1	WP_132401972.1
WP_140643017.1	WP_140643017.1
XP_003711760.1	XP_003711760.1
XP_006958304.1	XP_006958304.1
WP_133042554.1	WP_133042554.1
WP_142102097.1	WP_142102097.1
WP_076463464.1	WP_076463464.1
WP_164738251.1	WP_164738251.1
WP_108799785.1	WP_108799785.1
WP_067747520.1	WP_067747520.1
WP_140197388.1	WP_140197388.1
WP_117317946.1	WP_117317946.1
WP_052173431.1	WP_052173431.1
WP_108580350.1	WP_108580350.1
WP_055855398.1	WP_055855398.1
WP_089232908.1	WP_089232908.1
XP_024530422.1	XP_024530422.1
WP_160484175.1	WP_160484175.1
WP_042393303.1	WP_042393303.1
WP_106745781.1	WP_106745781.1
XP_007871258.1	XP_007871258.1
WP_130506712.1	WP_130506712.1
WP_052230284.1	WP_052230284.1
XP_015795596.1	XP_015795596.1
WP_132882796.1	WP_132882796.1
XP_009227106.1	XP_009227106.1
WP_146292164.1	WP_146292164.1
XP_019768586.1	XP_019768586.1
WP_071279140.1	WP_071279140.1
WP_158069989.1	WP_158069989.1
WP_103955610.1	WP_103955610.1
WP_104318107.1	WP_104318107.1
XP_005775293.1	XP_005775293.1
WP_146819359.1	WP_146819359.1
WP_100161138.1	WP_100161138.1
XP_007399962.1	XP_007399962.1
WP_155355358.1	WP_155355358.1
XP_007822756.1	XP_007822756.1
WP_037457809.1	WP_037457809.1
WP_165403777.1	WP_165403777.1
XP_030994356.1	XP_030994356.1
XP_001833981.2	XP_001833981.2
WP_134462112.1	WP_134462112.1
WP_152476114.1	WP_152476114.1
WP_152972897.1	WP_152972897.1
WP_147849915.1	WP_147849915.1
XP_022174784.1	XP_022174784.1
WP_115518374.1	WP_115518374.1
WP_155425015.1	WP_155425015.1
WP_145978702.1	WP_145978702.1
WP_166159639.1	WP_166159639.1
WP_132316033.1	WP_132316033.1
XP_003660961.1	XP_003660961.1
XP_024745735.1	XP_024745735.1
XP_017303840.1	XP_017303840.1
WP_120088702.1	WP_120088702.1
WP_134157268.1	WP_134157268.1
WP_093701062.1	WP_093701062.1
XP_004363644.1	XP_004363644.1
WP_082542368.1	WP_082542368.1
WP_106471586.1	WP_106471586.1
WP_084645375.1	WP_084645375.1
XP_028154700.1	XP_028154700.1
WP_148296513.1	WP_148296513.1
WP_135860105.1	WP_135860105.1
WP_160970329.1	WP_160970329.1
WP_130278316.1	WP_130278316.1
XP_019760007.1	XP_019760007.1
WP_085360331.1	WP_085360331.1
WP_056320635.1	WP_056320635.1
WP_159981769.1	WP_159981769.1
XP_018024915.1	XP_018024915.1
WP_118069647.1	WP_118069647.1
XP_009552825.1	XP_009552825.1
XP_003743919.1	XP_003743919.1
XP_680677.1	XP_680677.1
WP_033536310.1	WP_033536310.1
WP_162402829.1	WP_162402829.1
XP_030762857.1	XP_030762857.1
WP_156179073.1	WP_156179073.1
WP_165396514.1	WP_165396514.1
WP_096453478.1	WP_096453478.1
WP_015603188.1	WP_015603188.1
WP_103069474.1	WP_103069474.1
WP_144341228.1	WP_144341228.1
WP_121939394.1	WP_121939394.1
WP_027183124.1	WP_027183124.1
XP_001389920.2	XP_001389920.2
WP_012164830.1	WP_012164830.1
WP_079550114.1	WP_079550114.1
WP_009515978.1	WP_009515978.1
WP_099647973.1	WP_099647973.1
XP_013068640.1	XP_013068640.1
WP_003299454.1	WP_003299454.1
WP_159646387.1	WP_159646387.1
XP_028134087.1	XP_028134087.1
WP_099512331.1	WP_099512331.1
WP_129346705.1	WP_129346705.1
XP_019930657.1	XP_019930657.1
WP_092464361.1	WP_092464361.1
XP_026289490.1	XP_026289490.1
WP_155411745.1	WP_155411745.1
XP_014556294.1	XP_014556294.1
WP_151571441.1	WP_151571441.1
WP_127746156.1	WP_127746156.1
WP_145206889.1	WP_145206889.1
WP_049330058.1	WP_049330058.1
WP_167537965.1	WP_167537965.1
WP_148620689.1	WP_148620689.1
XP_028397112.1	XP_028397112.1
XP_028500205.1	XP_028500205.1
WP_032830218.1	WP_032830218.1
WP_010144100.1	WP_010144100.1
WP_113505901.1	WP_113505901.1
WP_127972861.1	WP_127972861.1
XP_007922937.1	XP_007922937.1
WP_080630149.1	WP_080630149.1
XP_026290004.1	XP_026290004.1
XP_031337892.1	XP_031337892.1
XP_016628032.1	XP_016628032.1
WP_110763397.1	WP_110763397.1
WP_142458512.1	WP_142458512.1
XP_007389296.1	XP_007389296.1
XP_023450359.1	XP_023450359.1
WP_150082753.1	WP_150082753.1
XP_003742566.1	XP_003742566.1
WP_062829986.1	WP_062829986.1
XP_008075845.1	XP_008075845.1
XP_021209068.1	XP_021209068.1
XP_021953045.1	XP_021953045.1
WP_110854589.1	WP_110854589.1
WP_135099654.1	WP_135099654.1
WP_157608104.1	WP_157608104.1
WP_107407360.1	WP_107407360.1
WP_084582345.1	WP_084582345.1
WP_158195446.1	WP_158195446.1
WP_124733927.1	WP_124733927.1
WP_068734674.1	WP_068734674.1
XP_007765290.1	XP_007765290.1
XP_007298413.1	XP_007298413.1
WP_054686334.1	WP_054686334.1
WP_146825198.1	WP_146825198.1
XP_024734772.1	XP_024734772.1
WP_143596145.1	WP_143596145.1
XP_017777357.1	XP_017777357.1
WP_028028756.1	WP_028028756.1
WP_146651433.1	WP_146651433.1
WP_147990070.1	WP_147990070.1
WP_113358279.1	WP_113358279.1
XP_021945730.1	XP_021945730.1
WP_091833617.1	WP_091833617.1
WP_158047505.1	WP_158047505.1
XP_007869833.1	XP_007869833.1
WP_078612885.1	WP_078612885.1
WP_132429654.1	WP_132429654.1
XP_014679711.1	XP_014679711.1
WP_163010626.1	WP_163010626.1
WP_141141744.1	WP_141141744.1
XP_016244461.1	XP_016244461.1
XP_028495219.1	XP_028495219.1
WP_056349953.1	WP_056349953.1
XP_012182723.1	XP_012182723.1
WP_043873945.1	WP_043873945.1
XP_031341071.1	XP_031341071.1
WP_043161569.1	WP_043161569.1
XP_001226009.1	XP_001226009.1
XP_007326304.1	XP_007326304.1
XP_027196321.1	XP_027196321.1
WP_136347611.1	WP_136347611.1
WP_133695003.1	WP_133695003.1
XP_018077577.1	XP_018077577.1
XP_002566769.1	XP_002566769.1
WP_133298629.1	WP_133298629.1
XP_026605453.1	XP_026605453.1
XP_017304313.2	XP_017304313.2
XP_024339379.1	XP_024339379.1
XP_001598895.1	XP_001598895.1
XP_013239864.1	XP_013239864.1
XP_031575621.1	XP_031575621.1
XP_001833869.2	XP_001833869.2
XP_022817584.1	XP_022817584.1
XP_027201587.1	XP_027201587.1
XP_013658960.1	XP_013658960.1
WP_020923704.1	WP_020923704.1
WP_072090666.1	WP_072090666.1
WP_166676661.1	WP_166676661.1
WP_066964061.1	WP_066964061.1
XP_005792948.1	XP_005792948.1
WP_024512536.1	WP_024512536.1
XP_028140178.1	XP_028140178.1
WP_158604489.1	WP_158604489.1
WP_038378256.1	WP_038378256.1
XP_024338197.1	XP_024338197.1
XP_017772412.1	XP_017772412.1
XP_008478083.2	XP_008478083.2
XP_014178177.1	XP_014178177.1
XP_028501986.1	XP_028501986.1
XP_661816.1	XP_661816.1
WP_142114335.1	WP_142114335.1
WP_086492764.1	WP_086492764.1
WP_159168884.1	WP_159168884.1
WP_134738859.1	WP_134738859.1
XP_031026606.1	XP_031026606.1
WP_142116011.1	WP_142116011.1
WP_104663483.1	WP_104663483.1
WP_136829927.1	WP_136829927.1
XP_018026203.1	XP_018026203.1
WP_159111468.1	WP_159111468.1
WP_142788270.1	WP_142788270.1
XP_021957001.1	XP_021957001.1
XP_031330249.1	XP_031330249.1
XP_007270287.1	XP_007270287.1
XP_022207366.1	XP_022207366.1
WP_050525191.1	WP_050525191.1
WP_027136119.1	WP_027136119.1
WP_116038723.1	WP_116038723.1
WP_034264728.1	WP_034264728.1
WP_118931306.1	WP_118931306.1
XP_009066031.1	XP_009066031.1
XP_025398137.1	XP_025398137.1
WP_106729465.1	WP_106729465.1
XP_030983592.1	XP_030983592.1
WP_035085671.1	WP_035085671.1
WP_112322097.1	WP_112322097.1
WP_021691532.1	WP_021691532.1
XP_018332923.1	XP_018332923.1
WP_052509753.1	WP_052509753.1
WP_088284770.1	WP_088284770.1
XP_001586521.1	XP_001586521.1
WP_148278828.1	WP_148278828.1
WP_099554633.1	WP_099554633.1
WP_072846157.1	WP_072846157.1
WP_165384258.1	WP_165384258.1
XP_006958999.1	XP_006958999.1
WP_165281150.1	WP_165281150.1
XP_013351054.1	XP_013351054.1
WP_063457477.1	WP_063457477.1
XP_014290965.1	XP_014290965.1
WP_104464135.1	WP_104464135.1
XP_007861677.1	XP_007861677.1
WP_015895867.1	WP_015895867.1
WP_137947673.1	WP_137947673.1
WP_135706621.1	WP_135706621.1
WP_111109817.1	WP_111109817.1
XP_005854000.1	XP_005854000.1
WP_162319556.1	WP_162319556.1
XP_007701632.1	XP_007701632.1
XP_003343854.1	XP_003343854.1
WP_150787229.1	WP_150787229.1
XP_002429705.1	XP_002429705.1
XP_031341061.1	XP_031341061.1
XP_015512042.1	XP_015512042.1
XP_023945873.1	XP_023945873.1
WP_051561269.1	WP_051561269.1
XP_024548995.1	XP_024548995.1
XP_023906926.1	XP_023906926.1
XP_012752555.1	XP_012752555.1
XP_007742550.1	XP_007742550.1
XP_025505510.1	XP_025505510.1
WP_149754410.1	WP_149754410.1
WP_068013862.1	WP_068013862.1
WP_128943090.1	WP_128943090.1
WP_158756567.1	WP_158756567.1
[truncated: 160,369 more rows]
