# Supplementary material
Source: MDPI journal article supplement (https://www.mdpi.com/2073-4344/10/9/1072)
Supplement: s1 [file s1 › catalysts-923799-sm-r1/Supplementary Dataset 2.fasta]

>c0
AAAAAAAEAWDYIIVGGGTAGCVLANRLTAGTGKRVLVLEAGSGDYADTRIRIPAGVLDLFQGPNDWHFTTQNEPATSGHGVYVCRGKVLGGSSSMSVMLYNRGSAHDYDRWESAFGLGEWSAASVLPFFKLSQDDQTGLWSSDPRHHSTGGPWGVDHVRYQNPLSKCFLKACAEAGLPANSDFNNWGQPQEGAGRFTVSHRGGSRVSSALALLDPAVRDASRHLAVLCGALAHRVIFEEGRVAAGVEFSVGGAVHTARLAPGGEVLLAGGAVQSPQLLMLSGVGPEEHLAEHGITTISHLAGVGGNYQDHPAANVSFECAESKRGVSPTSHCIFAFGRKIPHPWWILRWFLFGSGPLTSPGCDHGGFFRTEAAGGELPLPDLQMRFLPARAVTADGMNSFAKFRETTRLPDGFSFQSIAVRPHSRGCVRLASASALDKPIIEGNYLQDERDVASIREGLRLSRRLAQQPAFAEFLGPEVFPGPAVQTDGQLNAYIAETVPVHTANAVVGTCRMGSPEDPLTVCDGELRVVGTRGLRVCDASVMPTLPGCQTGAPTVMIAERAASMI
>c1
AAGIGLSPSGFSSGSLLGGAWVTSTIDPDDATRSTSESSYLQDAIQETQMTVYTHTQASKILFNANKKATGVTVLTQGLEYTLSANKEVIVSAGVFHSPQLLMVSGIGPPAALSGQGIPVVSALSGVGQNLQD
>c2
AAKAAQEEWDYIIVGGGTAGCVLANRLTAGTRKSVLVLEAGGSDFDDKRIRIPTGVLHLFQHPQYDWYFNTSNEKKTAGRGIYLCRGKVLGGSSCLNVLLYGRGNAHDYDLWGSEFGLTDWVASKVLPYFKRTEGDRSGLAEKDPKHHSKDGEWGVDHVRYQNVMSKCFLQACDELGLPANEDFNNWDRNQEGAGRFHVSERNGMRCSSASALLAPAQADKSRSLTVLCGASVSKILFDTRNSATGVNFTCGGTIQNARLKHGGEVIVTLGAIQSPQLLMISGIGPKAHLESHNIATISDRAGVGENLRDHPAANVSYQCPDSKRGISPTSKAFFIMGKKLPNPAWLWEWVTRKSGPLTSPGCDHGGFFRTSEATQEKNSPDLQMRFLAVRAVTADGMNSVAKFRDVQNHPDGFSFQNIAARPHSVGRVRLGSSSMADHPVVEGNYLSDPRDVATLREGLKLSRRLAKQDAFKDFVGHEVFPGPEVKTDEQLDAYISESVHTANALVGTCRMGRSDDPLAVCDSEMRVLGVHNLRVCDASVMPKLPGCQTGAPTVMIAERAA
>c3
AAKVAQEEWDYIIVGGGTAGCVLANRLTAGTGKRVLVLEAGGSDWNDKRIRIPTGVLHLFQHPQYDWYFNTSKEKNTAGRGIYLCRGKVLGGSSCLNVLLYGRGDAHDYDVWGSEFGLKDWVASKVLPYFKRTEGDRSGLAEKDPKHHNKDGEWGVDHVRYQNVMSKCFLEACDEMGLPANDDFNNWDRNQEGAGRFHVSERNGTRASAASALLAPAQADKSRSLAVLCGASVSKIQFDSVTSKKATGVSFTCGGESHSARLKLGGEVIVTLGSIQSPQLLMISGIGPKAHLASHNIAVVADRAGVGENLRDHPAANVSYQCPDSKKGISPTSKAFFVMGKKLPDPAWLWEWLTRKSGPLTSPGCDHGGFFRTPAASQENNSPDLQMRFLAVRAVTADGMNSVAKFRDVRNHPDGFSFQNIAARPHSVGRVSLASSNMSDHPIVEGNYLTDPRDVATLREGLKLSRKIAQQKAFKDFVGHEVFPGPEVQTDEQLDAYIEESIHTANALVGTCRMGRSDDPLAVCDSEMRVLGVHNLRVCDASVMPKLPGCQTGAPTVMIAERAA
>c4
AALVLLIASVAINGVHAGWWSVAPKSANGSVYGKHCGRCRPSGRVWPFKGGVIGIDGLRVIDASVMPRLPNGNTQAATVMIAEKGSDLILGTIVNNPRLTLSSLRAVSE
>c5
AAVLHVEKARRAGCLVVPEARVVRLIEGAEGRIAALEFRRPDGVLHKVRARIFVLAANALETPRLLMHSGLCRNSRALGRFLMDHLLVHCSFRAPEPVYAGRGPQTTSLVDYGRDGAFRRRYAAAKIFLSNALDVQGEAVRLLANPAQWPVLKEKLREYAKFHAMFGAEIEVLPDPDNRLMLVADERDAFGMPKLRARFQPGDYSERGVRHWLDQMQSWVEAMGGKIKGTRVQMSSHHPAGTCRMGTKPEDSVVTRDLRCHEHPNLYIVGSAVFPTIGTANPTLTIAALALRLAEKLARE
>c6
ACVAQLKFQTRTLLIMKFSVAEKLCHFLVFTVVKCQNFNLTVNYYENVIQGGEAEAFVHPLPENANEYRPIDNNITDFGTYDYIVVGAGSAGAVLAARLSEDKNLKVLLLEAGGHPDSFSDTPGEMIYLQGLRFNWNYKSVPQTTCCL
>c7
ADDEFDYVIVGGGTAGCVLANRLSADERTRVLLLEPGPSARGALKVAVPVALVKLFNSNWDWSFKSHPQAESNLRPFHLARGRALGGSSATNALLYHRGTAADFDAWSCDGWGSAEMLAAFKRVEGQRRAALGSSPFHSTTGPVSVEDARYTNSLSTRFVAAAVAQGHARRDDFNDWSQGQEGVGKFQLQTRRGRRVHAAASHLRPALRRPNLEVRTSARVTRVLLGDPRDSGAAAARALGVAYVDEAGGGGERRVALRAGGEVILCAGAVGTPQLLMLSGVGPRTHLESHRIPTRVDLPGVGAHLADQPAVVNSHAISRPISITDHMLLRGTGVLHPARLAQWALRGSGPLASTGCDYGGFFR
>c8
ADDEFDYVIVGGGTAGCVLANRLSADERTRVLLLEPGPSARGALKVTVPVALVKLFNSEWDWSFKAHPRAETNLRPNIHLARGRALGGSGATNALLYHRGTAADFDAWGCDGWGSAEMLHAFKRVEGQRRRTLRSSPFHSVSGPVSVEDARYTNSLSTRFVEAAVAQGHARRNDFNDWSEEQDGVGKFQLQTRRGRRVHAAASHLRPALRRPNLEVRTSARVTRVLLDDPRDSGKAAARAVGVAYADEAGGGGEERRASGEVVLCAGAVGTPQLLLLSGIGPRAHLTSHGLATRVDLPGVGAHLADQPAVVNSHKISRPISITDHMLLRGTGVLHPARLAQWALRGSGPLSSTGCDYGGFFKVGPGSIAAETGAEPATADAADAASGLQPNLQLRFVSGLGTQPDGVSSYEDIGKAGMPDSGMTFQSIAVRPVSRGRVELDSTDPLAPPRLWPGFCEAAQDVATLREGIRLARRLAASEAFDDVRGEEVWPGTAVTSDAELDEYIRANVHSANALAGSCRMGSANDEXXXXEAVVDTRLRVRGVESLRVADASIMPAMPGAQLGATVFAIAEKAADILLG
>c9
ADPAHRVLLIEAGGDASRDKRAQVPWAFTKLLRSEYDWDFHVEAEAAVNQQEVYLCRGKALGGSSVTNVMLYHRGSPADYDAWEEAGARGWGAKDVLPYYLRVEDYGDGASQYHAVGGHVSVQEVPYQNQLSATFLRAMGQLGFRPNGDFNDWSSPQEGYGRYKVTQRAGRRCTAADGYLAAARERANLVVVTGAQATRLALDSAYDGAGRLQVSGVEFARGDEPGIGPAEHLREVGVPVRADLPGVGSGLQDHPAVVVSYESKKAVAATDDALLKGYASLVNPLKGYASLVNPLATLRWLLFGRGPLACAACDHGGFVRSSPDLDQPDVQIRFVPARASSASGMNTLIELGRRARFLPGFSTQVVACRPRSEGRVRLRSADPFAKPIIEGIHLGAAEDVASLRHGIRLGRQVCAAAAFDEYRGEEVFPGAAVQSDEQIDEYIRSSVHSANALTSSCRMGDPSDPAAVLDSHLRVRGVGGLRVADASAMPRIIGGQTQAPTYMLAERAADIL
>c10
ADREGGLRAGVERAREILEPVCFSSLSGSSSRGQAIDRLARDSGARAEAPALAITQSERLNAFGIPQAACLRCGDCLAGCRYGAANTVAQTWLQDAWQHCADIFTGIVVRRVERTFDGRRWRVYYATVSDVADSLDAADERFVTADCVVLSAGALGTTEILLRSAEHGLSLSRRLGQRFSGNGNQLGAVWNSEWRAGMTGVADADSEHPVGAATERVIDLREGQPLNQQLMIQDVALPGALARDCLAALSRAEAGRERTLSDSGGWLRRRWRKWRDRFGVSDRGALAHSLLFLAIGHDSAAGSVALTDDRLEIHWPGVAAEAAFDQARQLFRGWAKRMGGIPLSDIHWVASQPSPVMTWHPLGGCAMGDDVDAGVVDHAGRVFRRDEGGVHEGLYVADGSMLPMSLGVGPALTIAALAERNVRLIARDMGWTISEAAPIYSERLESESVSARIERRMQGYWLPDSGGHADFRIAAETGRDHGHFLEASLVMEAKDLEQALTDETLTMTLSGDVFSAPLGGERLRIRDGKMSLALNASDASRQIEYQALLEDSGGRQWRFRGLGQINPVSPRLMDESTQLYITIEPISGDDQAGNGVIGMEASELTGEMARIAISGAESREASGQWLARLGSLFHGPLWAVYGPALLSGTRARFLRPLRCGHPEWHGFEASDGTPLQLLRYPGAGRPVLLIHRPGASSRVYSLDALNTCLVEDLCETGRDVWLLDDRSSVFHGHRETPTDFASIDTLAETDYSEAIARVLEISGERGIDLIADGAAADLVMASMVGASGIDPATIGAAILIQPAAPGDGGGVDNSRISPAIRSLIPALYSGAESSDFRRSGELLDKALRNFAGEALPAITMIHGEKTLNPANERVLRLLRFLRENAGARGFGHHVVHDYDDIDCLIGSDASVDVYPLITRALDAVP
>c11
ADSANRVLLIEAGEDAKGDMRVKVPAAAVKLFKSERDWDFETPTDARLNGNSVYLCRGKALGGSSCTNVMLYHRGTAADYDSWEATGARGWGPNDVLPYYLKCEDYQEGASKYHGVGGPIAVQEVPYQNPLSRAFLKAAGALGYRKTEDFNDWSAPQDGFGXXXXXXXXXXGFGRYKVTQRNGVRCSAASAYLEGIKGRANLHIRTGAHITRLALDGVGDSLSISGVEYVCGPDDSARSVQLASGGEAIVCAGAVQTPQLLMLSGIGPREHLEEIGITVRKDLPGVGEGLQDHPAVLVSFEGTKRISVTDKIGIFGTRIPNPAALAQWVFRGRGPLTSVACDHGGFFRTSDEKPQADLQMRFVAARAMSNSGMSTLTKMGAGTRMQPGFTAQLLACRPKSHGRVRLQSDDPFAKPLLQDLYLSAPGDDDIVTLREGIKLARNLLRSREFDEYRGHEAFPGEEVRSDEQIEQYIRDSVHSANALTSSCRMGAADDPLAVLDSQLRVRGVGALRVVDASAMPQIIGGQTCAPTMMIAEKAADLILG
>c12
ADTDITHAMRQSNPQRFGPVYQKDLEKAENVHVILHANLTAIRTNEAFDRVTEIKATALGGNSISIDAKNVVLACGGVENARLLLAFGFSAKLPAIGRYFNFHPHMLTGQLLLEKPTLHSRFPYRWHSNNGTRILNQFVLSEQAQKREKLPNHAATIEEIRLPMTKGYSAGKRLFNRLRGRQNFDHVMDDLYDLLTDLDGAYTQWNSRHAEHQISLLNVETYLDQPPHPDSRITLSEDKDALGMPRAKINWAYFPHEPASVQRFNEILASSFGAAGVGRMKIADNMTAPVNFEELVREQSTGEHQIGATRISEDQESGVVDLNCKVHGFDNLFCAGSSVFSTAGWMNPTTTIVALSVRLAEHLQSQSEEWA
>c13
AEAKIGKNEFDYIIAGGGLAGCLLAERLTADGTKKVLMIEAGRPDYTDYKIRIPAGVLSLFRSVYDWQHETKGEKNCNGRNVFLQRGKVLGGSSCTNVCLNHRGSAQDYNDWGVPGWTADQVLPYFKLSGNDKTGRSTEYHGKNGEWVMEEVRYQNPLSKKFLQVGEAFGLGTNDDFNNWSKPQNGVGRFQVSQDNGERCSGATAFLSKAIKRKNLVVKTGAMVRRINFEEQTATGITYDLMGDDSNKVFEANLKEGGEVLVTAGAIASPQLLMCSGIGPADHLKDNGIKVVSDCAGVGSNLQDHPSAVVSFETPKSA*PLKLRLFGKTNPFPIMEWFMFGSGLATSVGCDHGAFVKTSASNDGQPDLQIRFLAARSLTPDGMTAFTQFRNTKVFPDGYSFQSVATRAKSKGRVTLASSNMHSKPVIEGGYLSDPTDLATLREGVKLNRLLGRSPEWGPYLGKEVYPGPNVQTDEQIDEYIKNTLHTANALTGTCKMGTGKDAVVGSDLRVRGVNGVRVCDSSVIPNIPGGQTATPTVMIAERAAAMI
>c14
AETKVTSQTYDYIICGGGCAGCVLAERLSADGTKRVLMLEAGRPDYDNTLIRIPAGVLRLFRSVYDWQYESSGEKECNGRNIFLQRGKVLGGSSCTNVLLHHRGSAKDYDDWNIPGWTGVDVLPFFKMSEGDKTGRSTKFHGKDGPWTMDEVRYQNPLSKTFLKVGAAVGLGSNEDFNDWSKPQDGFGRFQVSEDGGVRCSAAAAFLKPCKQRKNLTVRSITMCRRINFDQSKTATGVTYDILGDDTCKEFKATLKEGGEVLVTSGALASPQLLMCSGIGPEKDLQEHGIEVISDLPGVGRNLRDHPAAVVSYQTSKRGVSVTSKLRIFGRTNPLPVLQWLFFKTGILTSTGCDHGAFVRTTASTDGQADLQFRFLAALALGPDGMTTYTQFLNQRSRHEDGYSIQSVAIRAKSQGSVRLASSNTHVKPVVDTSYLSHPADLATLREGIKLARKLSQRPEWGEYLGNEIYPGTNVKTDEEIDEYIRNTLHTANALTGTCKMGTGKDCVVGPDLKVFGVNNVRVCDSSIFPTIPGGQTATPTVMIADRAAAFI
>c15
AETKVTSQTYDYIICGGGCAGCVLAERLSADGTKRVLMLEAGRPDYDNTLIRIPAGVLRLFRSVYDWQYESSGEKECNGRNIFLQRGKVLGGSSCTNVLLHHRGSAKDYDDWNIPGWTGVDVLPFFKMSEGDKTGRSTKFHGKDGPWTMDEVRYQNPLSKTFLKVGAAVGLGSNEDFNDWSKPQDGFGRFQVSEDGGVRCSAAAAFLKPCKQRKNLTVRSITMCRRINFDQSKTATGVTYDILGDDTCKEFKATLKEGGEVLVTSGALASPQLLMCSGIGPEKDLQEHGIEVISDLPGVGRNLRDHPAAVVSYQTSKRGVSVTSKLRIFGRTNPLPVLQWLFFKTGILTSTGCDHGAFVRTTASTDGQADLQFRFLAALALGPDGMTTYTQFLNQRSRHVSWGYSIQSVAIRAKSQGSVRLASSNTHVKPVVDTSYLSHPADLATLREGIKLARKLSQRPEWGEYLGNEIYPGTNVKTDEEIDEYIRNTLHTANALTGTCKMGTGKDCVVGPDLKVFGVNNVRVCDSSIFPTIPGGQTATPTVMIADRAAAFI
>c16
AFHNYRASISAEYDGYFDFKTEGSRPTSGYIPRFRNLYKQETNFLRGYAAGMSARRANTTDRDSVGESLKNSLLNPKWTNWSAGSHMMGETIPKETNKITLDPIKKDAHGLPIMHMDVSYDDNDDKMVKDFIEQFTEMYTKAGFKNIRSHDTKQAPGLDIHEMGGCRMGSDPKTSMLNKWNQMHAVKNVFVSDGASMTSTSTQNPSLTYMALTARAVDYAVKEMKKGNL
>c17
AGCIVKTQCEVKCVVKNPYSQMRGLNLSDALGCGFSCNGNTVAFLAGSPAPLNSYGLVRKKILETPFQLRPGPAISSSYTSSLGFTIQNAVLPTAYPYLLFKGITTYGWPTGYWFFHGIIDKLKHFAGFKSSQAMVLNAMGYDEGDGKIMFEKSTNKICFSPPRDPLLPRKVEAFQKLTKKLGGILFLSRYRSTSVHLLGGCNASSDPSQGVCNSVGQVFDPKAAAGVHPGLYVCDGSLIPCSVGVNPCLTIAAVAEHVSRHLVKDVIEYKNKKGIEDVAKTVDKNLKSTQRSMVVIKETMKGYIGGMPCAAYLKMKMNSQNLQGFDYTNSVMEDSHSLLRGKVGGCVVFTAIDKDTLHVIDGDVDLCQVDSRTPYTQYMRYRILLAASSGLRYILEGKKIMNPFLFALYAWRETTTLHVTFKNVSGNGLRDEVTNLTGELKISVIELLKSLMTLEGNRRINFACLLTQSVLRTYILQIPRGGHNDCNLPDSYHKHYPSSSVHEIKAEDGRIICCRQWKYGQTPRRLKGEKQLNPVLLLNGYSIESYWLPMEPNDLVRTLLEEGHETWLLQSRLHPLNPADNFTIEDIGRYDIPAAIGKILELHGHNIKVHIVAHCAGGLAIHIALMGGHISATHIASLSCTNSSMFFKLNALATFKMWLPLVPVSMAILGKNNILPLLEMSETSFRHHLLRCIARFIPRYERCTCNECEVLSGVFGNVFWHQNISRTMHHWIYRENTTRLPMAGFPHLRKICNSGFIVDSHGNNSYLIHPERMKLSTLYISGGRSLLVTPETSFLANKYMKMHQPGFRHERVVVDGFGHSDLLIGEESDKKVFPHILSHIRLAEQGKNGVISSGEKYSKESLAWEDDFYSASRGFGSSWYSQRIVVLLMLLWRGKEPLWGIAQFTFTAVNKIFSGISALDALVSAGKSSQDLLAMIKKEVG
>c18
AGCVLANRLSANPNVSVLLLEAGGEHGDHKNIVVPAGFTKIFRSPMDWNLFAKRQSEVAGRMLYLPRGAVLGGSSATNATLYMRGAAADYDGWNIPGWGSGDVLEWFKKAEGNVDETDPAVHGTAGPYHVETPRYTNELHQKFFDAVDEMGMRSNPDFNDWRRPQEGHGVFQVTQDKGRRADGYRQYLKPALDRPNLRVMTGAKVHRVAFDGKKAVGVEYISEELSPMRVSMTASLKPEGEVIMSSGSIHTPQILQMSGVGDAGALAGFGIECVAHVPGVGQNL
>c19
AGCVLANRLTAANKRVLVLEAGRADYDATLLRMPLGVLRLFKSKYDWDFTTCNEANTSGRGIFLPRGKVLGGSSCLNVLLYNRGDANDYDLWEEKFGCQGWAAKDVLPYFKRTEDNQTGLAKSDPVHHSTGGEWSVDHVRYQNPMSKRFLDACKEMGLPLNNDFNSWKQKQEGAGRFFVSERRGVRCSAASAMLEPALKDGKRCLRVLSGSPVQKILFAEDGGKTTGVIFQTGDVDHLAKLAPGGEVLLTGGAIHSPQLLMLSGLGPANHLEEHGIKVVRDLPGVGENLQDHPAATVSYQCPISGWGASTVSKIRLFGTKVPHPKAMLEWLLFGSGPLTSPLCDHGGFFYTPAASEGAKSPDLQMRFVAARATMADGMKSYCTAREQTNHPDGMTFQSIAVRPHSRGRVCLASANPREKPIIEGNYLTDERDMATIREGLRLSRKIAKQPAFAGYLGHEVFPGPEFQTDAQLDAYIASTVHTANALVGTCRMGQASDPQAVCDPALRVHRVTGLRVCDSSVMPQMPGGQTGA
>c20
AGDSAFDYIVVGSGPGGVTVADKLSESGASVLLVERGQATTGQWNGNNRPQWLDNTGMTFYDVPALDDQIWTKGGDFTNDIFCPDIVGGISGCVLGGSGAINSGLWWKPTTWDWDTMFPEKWNSTNMANVTERVFSRLPGTEVPSQDGKLYYQQGADVIEGALHAANWTLVSANEVPNQKDRVYSNTTFMFQDGERSGPMSVYLGSAYPRPNFSLYTNAIVDRVIREGSKITGVEISNTAADGFRGTVKANKAVVLAAGAFGTPKVLMRSGIGPKDQLETVRNAEGSKMINEDQWIDLPVGYNLMDNINTDIVISQPDVVYYDFAGLWNSPNQGDVDAYLNGRTGMLAQSASNLNPMIWEMLNGTNGLQGLQWTARVDTSLDIPNDNKHNMVLAQYITLGQAARGRTTITSDLKMNVSTGVSIMEHESDQIAIAQGIETMVNILKSVPGLEVLSPPSGMSALDYVKSTTHLYVNHWLGSCKMGNDDGRKENGTAVVDADSKVYGTDNLFIADGSIFPGQTTSNPQAAITIVGERVAELILALNQ
>c21
AGGKYDYILAGGGTAACVLANRLSKWAPDKRILVLEAGKDNFDHPYVKIPSAIARLFKSDLDWNFTSAKQEEPGLGSNHGGVYLCRGKVLGGSSCTNVLLYNRGTANDYDGWECPGWGAKDVLKYFMRSENNHDASSSAKFHSRDGPFDVNPIQYKSVLTESFLDAGVSFGFEKNDDFNNWDRSQQGVGPFHVAQHRGVRTSAASAYLSEVMGKSNVTILTEALVKKVKLEGKHARGVHFSKAGVDATALLKDGGEVILTAGAVGSPHILMLSGIGPREHLGEHGIACVADLPVGSNLQDHPAALVTYTIDKPLALTDEFKFGGLGIPMLPNPMPILRWFFGGSGPLTSVGCDHGGFFKTDDSKAEPDLVSHMPP
>c22
AGGYFPDRRLHSRRGRGLARMITEFCGPPTLEEARTWAGVPGGGVVEISGLGLFGPISEGQTYPRGESHSRFMGANLFDDHIAGLLMQGEDLPQAGTIVDLDPGVRDFRGLPVARLTYRPHEFELAASDHYGPRLADILAAAGADVVAFAPKNAPASTGPGSGTVPDVTAAVLAQVPGFSGAAAGPFSPASPVPNTQHILSGLRMGRDPNSSVCNPSGRLHAWRNLHCVDGGLFCSSTPVNPTLTIWALAHRVATLLAGHRTPRHDRAYGQRVSPRRHKRP
>c23
AGLDGRVLYWPRGRVWGGSSSLNAMVYVRGHAEDYERWQRQGARGWDYAHCLPYFRKAQGHELGASRYRGADGPLRVSRGKTNHPLHCAFLEATQQAGYPLTEDMNGFQQEGFGWMDMTIHEGKRWSAACAYLHPALSRTNLKAEAETLVSRVLFEGTRAVGVEYVKNGQSHRAYASKEVILSGGAINSPQLLMLSGIGNADDLKKLGIPVVCHLPGVGQNLQDHLEIYIQQACTRPITLHSAQKPLRKVCIGLEWLWKFTGEGATAHLETGGFIRSQPGVPHPDIQFHFLPSQVIDHGRVPTQQEAYQVHVGPMRGTSVGWLKLRSANPQDHPVIQPNYLSTETDIEDFRLCVKLTREIFAQEALAPFRGKELQPGSHIQSDKEIDAFVRAKADSAYHPSCTCKMGQPSDPTAVVDPQTRVLGVENLRVVDASIMPSMVSGNLNAPTIMIAEKAADIIKGQPALWDKDVPVYKPRTLATQR
>c24
AGRQAGYPVTVDSNARMMEGFGPNEQTIAGGRRQSAARAYLDGAMGRKNLTVRSDVLVDTITVQNGRASGIVYFDRSARLTARARREIVVCCGAFGSPALLLRSGIGPADELRQLGISPAVDSPDVGKNLQDHPDVTIQFWCKTPHGLYATTRNPRRTLVGLQWFLLKSGPAASNQFEAAAYIRSRAGVEYPNIKLELLPLAFEESGFTPRKGPSFQIHMTLLRAKSRGQVTLKNRDPREGPAILFNYLEDGTDIQVMREAIRLTREIVAQPAFEDIAGDEIAPGREMTADDDIDQWLRHHVATAYHPAGTCRMGGDETSVVDPALRVRGIRGLRIADASIMPLEVSANLNASTIMIGEKASDLILGNRPPEKADAEWWVNPSWRIQQR
>c25
AGTDGSRDLRIRVPAGLVKVFKSEYDWDFETEPVEGTGRGVYLCRGKCTGGSSSTNVMLYHRGTPADYDNWVAKGAVGWGAGDVLEYYRRSEDNLVDGPSQYHGVGGPVGVGHVPYVNRLSEAFLDATGSLGYRRQHDFNDWGAQQDGFGRFRVTQRNGERCSAWNAYMTDTGARKRSNLQVVTGAHVTKVRLEGSEEEGSLCASGVEYMGSGDDGAPVCAQLAAGGEVLMAAGAVMSPQLLMLSGIGPVRKELPGVGCGLADHPAVLVSYGSKKAVSVTDEIKLAGTSLNNPLTLLKWLAYGQGALTSVACEFGGFFRTTKQAAQPDLQVRFVAAKALSADGISTLEKMGAGAKMSPGYTTQIIAIRPRSEGTVRLRNADPLAKPLLDGVHLTHDADVKTLVEGIKLGRKLCLAESFDEYRTEEVHPGTAVQSDAEIEEYVRQTV
>c26
AGWGWKGVLPFFRHLETDQDFNGSAHGCDGPVPIRREPRTAWSPLAHAVHAAATHRGFPHIEDANADFRDGHCTLPNSRFERSRASGSFCYLDARVRRRSNLRILSNHTVRRIAFEGRRAVGAVVSRADGSGAIFRAREVILTAGALRTPVLLMRSGVGPGEHLRAASIEVTVERRGVGQNLQNHAVVYAVALLKKGARETDWTVKPAASIYLRWSSGEAGCPAGDLGLYVRSYLSWHALGRRMASLAPVLLKPASRGRIRLDSSDPMSEPRIEFNFLEDARDLPRLMAGVRLAADLFHSDELHTVCGRGLALRNVAAAMRFNARSVRNAVSVGMAAALIDLTPSIGSSLLAAFAEMQPLSEVAANADALAEFIAASITGTGHVCGSCRMGSKEDALAVVDPAGRVYGCEGLRVADASVMPTVPSGNTYIPTVMLAEKIAQAIAGSSLSQAEFATHEARFDDGPQRAAVMAARELEP
>c27
AKFAGAEIYTGVEVRFLRKVEDWYEVHYDLHVPQVDGSLATLACVTTARMVVLGAGSLGSTEILLRSRCQGLSVSEQLGCHWTGNGDALGFVRKTECPTSGAGYSAYETCRTPVGPTIQTNLFYPNRPPSERILIQEGAAPRSYAKALSLLMRDVNLDSTQVLLGMGHDGAQGRISLNERGMGHVYWPGSLDSSYRRYIRQEFERVASAMGGKYDYLRAFGDRLISVHPLGGCGMADDITCGVVNDRCQVFDASSGGVFQNLYVIDGASLPTSLACNPLLTITALAERCSDWIVNDPERADWFTPAAPSALAGR
>c28
ALVECFPHMDAGVAGVAAPVGTGHDVDLVIVGSGYGAALTAREFAGSRVETADGIGRPLSICILERGAEYLQGAFPSRFADLAGHVRFSTPGRTAPRGRPLGLFDLRLGGDVSVLLANGVGGGSLINAGVMLRPADDVMDASPWPSALRADPLRACDYDTVGGWLGAGTAAAPNTVAGTASAGLDKTAALGRIDGAARPVPLTVALRPGTRTVAGVPLSACVGCGDCATGCNQNAKISLDVGLLAQACHVPGVALHTGATVLRLERPPPPAGAPAEAETEPEGWVVIVQHTDAQLRLRQGRPFRLRARRVVLAAGALGSTEILLRSRRAGLPLSDLLGHRFSTNGDMLASVQGRDARVGAVADEDASAAAGTRRIGPTITAMIDRRDAPERCVIQDLAVPGALRHVFGETFATAATLHDLERCDGAPHRAAASDPQAVDPARLERMLPVALIGHDAADGRLELVPSAAGAGADVDREGDGGLRVDWPRLRDLAALGTQQEALERLARASPEIERVLPNPLWKALPDGMREDLGLPLGPLFTVHPLGGCAMGDSVIDGVVDHLGRVFDPAPGAAGATPGMPRLHEGLAVLDGAIVPTSLGVNPALTIATLAHRAARGLRRHWGIGPPAEPAEPSEPPSRVRPMFRAPVSAAAPARPTAIELVERLRGMATFADGQARWIELTLNSRPTLLRDLMSPTGPRRVTLDAPRCQLRVYEIDPLAGDDDEPAPGRIVLRSGLAGHIDLFARAPSTGWQRVWRGLRAWLPNRGLRDLTQRLLTWLASPPAPAMPELPATSATAATSASPAVAGEAVPVRRTRRGWAWLRQQVGRIVALASRAGAVRRLDYDLTIEGATGPLALQLAGDLRFRGVKQLGYARDANPLTQLMELTLEDFPGLARDRRGRLARPRLALHLPYLASVGVPLLRVVDQQDQPTALLDLARFAAYTTRILVDGHLWSFRKPDECWPSGEPPCERGWCGRAAGSPVGESAAPPPPPPCSWPCAPPEPSGWLLAMALIL
>c29
AMVYLRGQPRDYDEWRDAGAKGWGWNDVLPYYKRCESNDRFANDLHGTDGPLPVSDQQFTHPMSRRWVQACQQAGLRYNPDFNSGDQEGCGFYQINARGGRRGSTAVSYLGPARNRRNLVVKTGVRVLRIIFAGQRAIGVEALVNGRRTLLHAGSEVIVTAGAINTPRLLLLSGLGNAGHLMRLGLPVTQHLPGVGRNLQDHIEVSL
>c30
ANASTFIIGKTLRHKTVDKLTRLVRFGFSTEQLPHADNRVELSDKLDDLGIRRPRIHYAVHKYTQEALQQGYRVSKELFAAMGASHVGEDEFPVDDWNTAAHPMGTCRMGRDTSDSVVDKFGRCHNHANLFIVGASVFPTGSATNPVLTLAAITLMAVDEIGKA
>c31
ANRLIEDSNNKVLLLEAGPKDTILGTKWLQWKIHMPAALTYNLCDDKYNWFYHTVPQKNVNNRVMYWPRGRVWGGSSSLNAMAYVRGHAEDYNRWEREGAAGWSYEDVLPYFKKAQTHSHGGDDYRGHDGPLHVTRFPGEGELDQAWLKAGQQAGYPLTEDMNGYQQEGVGHMDSTVYKGERWSAASAYLRLALQRENLTTMNDVLVTRILFEGKKAVGIELVQNGVTKKYRADEIILSGGAINSPQLLMLSGVGDSDHLGKVGVNTVHHLPGVGQNLQDHLEVYIAQGCKKPVSLLRDQKGLRMIKVGVQWFLNRTGSASSSHLETGGFIRSSAAVPHPDIQFHFLPSQVIDHGRIAPKVEAFQVHVGSMRATSTGSIKLQSNDPREHPLLDPNYLDSEQDKYEMRQCVKLTREIFAQEAFDDYRGDEIAPGTDVQTDEEIDEFVRRKGDSAYHPSCTCKMGDTGDNMAVVDSQCRVIGLDNLRVVDASIMPSIVSGNLNAPTIMLAEKAADIIKGK
>c32
ANRLSSDPARSVLLVEAGGNDDHDPLTISSASNMYAHFPEYFWPGQTAAQIHLGGNSINIGHGRTLGGGSTVNGEIYVRPTPFVLQQWVRAGGERWSSENAVRHFKKMESFLPQDADMDIHGSDGELAVRQVYPEIPALVQKLTRQLPGKLDFLRFQIIMIPIHP
>c33
APPAEETWDYILVGGGAAGCVLAERLSQDPENRVLVLEAGNDGSRDMRIRVPAGLVKVFKSEYDWDFETEPVEGTNRGVYLCRGKVLGGSSCTNVMLYHRGTPADYDSWVQQGAVGWGPSEVLDYYRRAENNIDGPSQYHGTGGPMPVADVPYINTLSAAFLEACGNLGYRRNPDFNDWSAPQDGFGRFKVTQNNGERCSAHNAYLQGAGALKRPNLTVRQGAHVTRVRLEGGEAELCASGVEYTDGAGGAPTAAQLAPGGEVLLCAGAVQSPQVLMLSGVGPRAELEALGIEVRKELPGVGGGLQDHPAVLVSYGATKRVSVTDEIKWFGSSLPNPITLLRWLLWKRGALTSVACEHGGFFRTAKGFSQPDLQVRFIAARAMSPDGISTLEKMGAGERMQPGYTTQIIAIRPQSAGRVRLRSADPMDKPVLENVHLSDDADVATLREGIKLGRKLCQCPEFEPYRDAEVYPSAAVQSDDEIDSYVRATVHSANALTGSCRMGHDSDPNAVLDPELRVRGIGSLRVIDASAMPHIIGGQTCAPTIMMAEKGADMV
>c34
AQEAFRALALLQLTYTLFPKSAEVSDGDCFDYVIVGGGGAGCVLANRLSEQPGVTVLLVEAGGDPPIEAQWPALQTYTLRSYLDWNYTTTPDPVSQRCHKQQSGNIVAGRVLGGGTTLSSLYYVRGNPRDYDTWADLLADRSWSWDAVYPYFKKGEHLKDCEVLSSSCAKYYGTSGYLGLTRDPDPKSRRYLNAFKELNYSTPLDINGCSFSGFVQQMFMIANGERQSTAYAYLSPIKDRANLHVLKHATVYEILFDSSDRAIGVKLTKDNKNISVR
>c35
AQHHYDFIIVGGGSAGAVLANRLSENPHWRILLLEAGPDESEASDVPVLANNLQLGKFDWAYKPEPQPGRACIGHIGGRCNWPRGKVLGGSSVLNYMLYVRGNKGDYDEWRDFGNPGWGYEDVLPYFRKSEDNRNPYLAQDRRHHGTGGYLTVQEPPWRTPIAVAFVEAGVEMGYENRDCNGARQTGFMLPQATVRRASRCSTAKAFLRPARNRKNLDIVTEAHVMKVLIDKDTXXXXKQAYGVKFSRRGKQYKVLAGREVILSAGALNSPQILMLSGLGPRHQLASLGIPVXXXXLVDLGGVGRNLQDHYGSMGLVGFSEEPITIKEERFMNIPSMLEYAAKGQGPLSXXXXALGGVEGLAWINTKFANKSVDRPDLEIMFVSGSSASDSGTVKRVQGLTNETFYKMYAPLXXXXKDKDSFSFLLMVTRPTSRGYVELRSRNPFDKPIFEAGYFNHPHDIKVIREGMKFCIALXXXXTKTKAFRKYGAKIWEGRKIPGCEHFKLWSDEYLECLARHYTNTIYHHSGSVKMGPASDPGXXXXAVVDSRLRVHGVGGLRVVDASIMPTIVSGNTNAPTIMIAEKASDLI
>c36
AQPHPVALALVEAARATGIPSFDNPNGRMMEAGSGASISDVRADGQRRITIFDSYLRPVLNRENLTILTGASVQRIVIENGRATGVDVLRNGEVHRFNASEQVVLSTGSINTPRILMHSGIGDERELKRLGIPVMQHLPGVGENLQDHLCFPSIFEFREEMPPRGNGSEATIYTKLRSESRSPDVVMCQGEFPICSPEIAQQGVPQHAWSLVAGLARPRSRGRIRLRSAHIQDNIILQLNSLSDAEDVKTAKAAVELSREIGAQSALSEINKREAFPGSVFVDDLESFIRQSAVPFWHQTCTAKMGRDELSVVDGKLKVYGVENLTIADGSVFPRIPTGNTMAPCVVVGERASQILRAELLGENQRTSTVGNAA
>c37
ASAAASGEYDYILVGGGTASCVLAKRLLEQDPNNKILVLEAGSPDYEHKYIKIPAAVGRLFKSEFDWDYTSSGSTEGGLGANHDGVYLCRGKVLGGSSCTNVLLYNRGSARDYDAWKVPGWGSQDVLDYFKRSEKNSDFQVSGDAKHHGKDGPLSVSAVRYTNPLINTFLQASYKAGYAKNDDFNNWDRDQDGVGPFHVTQKDGERSSAASAYLSSVESEASLNVVTGAQVQKLDICPEKMEAGGVRYIKDGNAIEARVREGGEVILAAGAVGSPQLLMLSGIGPKNHLKDLGIECIADLPVGENLQDHPAAVVAYQVDKKVSVTDEFKLFGMGLPSPFPILKYFLSGTGVMTSVGCDYGGFFKTAKSKKDPDLQIRFIGGLATSPMGISNYKEYAKKWLSWPSGYTFQNICVRPRSKGYIRLKTANYQDKPVISTGYLTSDEDVESIRNGIKLSRKLGSSDEFKKFNPVELFPGPAVQTDEEIDAYIRNSAHSGNALVGSCKMGVDPKTSVVDPELRVMGIKSLRVIDSSVMPVLPGGQTCSSTLMIAEKGADLL
>c38
ASAAASGEYDYILVGGGTASCVLAKRLLEQDPNNKILVLEAGSPDYGHKYIKIPAAVGRLFKSDFDWDYTSSGSTEGGLGANHEGVYLCRGKVLGGSSCTNVLLYNRGSARDYDAWKVPGWGSQDVLDYFKRSEKNSDFQVSGDTKHHGKDGPLSVSAVRYTNPLINTFLQASYKAGYAKNDDFNNWDRDQDGVGPFHVAQKDGERSSAASAYLSSVEAEASLSVVTGAQVQKLDICPEKREAGGVRYVKDGAAVEARVREGGEVILAAGAVGSPQLLMLSGIGPKKHLKDLGIDCIADLPVGQNLQDHPAAVVAYQVDKKVSVTDEFKLFGLGLPSPFPILKYFLSGTGVMTSVGCDYGGFFKTAETKKDPDLQIRFIGGLATSPMGISNYSEYAKKWLSWPSGYTFQNICVRPRSKGYIRLKTSNYQDKPVISTGYLTSDEDVESIRNGIK*VSLSPPLFAGVRHESPLTLPRSPSLRPRHVTRLSRELGSSEEFKKFNPVELFPGPAVQTDEEIDAYIRNSAHSGNALVGSCKMGTDPKTSVVDPELRVVGIKSLRVIDSSVMPVLPGGQTCSSTLMIAEK
>c39
ASAAASGEYDYILVGGGTASCVLAKRLLEQDPNNKILVLEAGSPDYGHKYIKIPAAVGRLFKSDFDWDYTSSGSTEGGLGANHEGVYLCRGKVLGGSSCTNVLLYNRGSARDYDAWKVPGWGSQDVLDYFKRSEKNSDFQVSGDTKHHGKDGPLSVSAVRYTNPLINTFLQASYKAGYAKNDDFNNWDRDQDGVGPFHVAQKDGERSSAASAYLSSVEAEASLSVVTGAQVQKLDICPEKREAGGVRYVKDGAAVEARVREGGEVILAAGAVGSPQLLMLSGIGPKKHLKDLGIDCIADLPVGQNLQDHPAAVVAYQVDKKVSVTDEFKLFGLGLPSPFPILKYFLSGTGVMTSVGCDYGGFFKTAETKKDPDLQIRFIGGLATSPMGISNYSEYAKKWLSWPSGYTFQNICVRPRSKGYIRLKTSNYQDKPVISTGYLTSDEDVESIRNGIKLSRELGSSEEFKKFNPVELFPGPAVQTDEEIDAYIRNSAHSGNALVGSCKMGTDPKTSVVDPELRVVGIKSLRVIDSSVMPVLPGGQTCSSTLMIAEKGADLL
>c40
ASASASKRSYSHIVVGAGSAGCVMSHRLTEESSNKVLLLEAGPPDTILGSKLLQWKIHMPAALMYNLCDDKYNWYYHTEPQAHCNNRRMYWPRGRVWGGSSSLNAMVYIRGHALDYDRWESEGAHGWNYQNCLPYFKKAQCHEHGGDDYRGGEGPLNVSRGISGNDLHEVFIRAGVQAGYNRTEDVNGYMQEGVGLFDMTTRKGMRWNTASAYLRPALERPAKNLNVESGVLVTRILFEGKKAVGIEYVQKGQTHKVYAEQEVIVSGGAINSPQLLMLSGIGDADHLKEMGVPLVEHVPGVGQNLQDHLELYVVQKCKKPVTLLKDQKGLRMIKIGVQWFLNQTGPTGTSHLESGGFARSRPGIEHPDIMFHFLPSQVIDHGRKAPFMEAFQVHVGPMRPTSRGYLKLRSSDPRAHPVIQPNYLSTEIDRWEMRESIKLSREIFAQPAFDELRGGETEPGPEADTDEALDAFAREKSDSAYHPSCTCKMGDPSKDPMTVVDAATKVVGVDNLRVVDASIMPSVASGNLNAPTIMLAERAADIIKGK
>c41
ASMNYDYIIVGAGSAGCVLANRLTKDANHRVLLVEAGPKNKGLSLKIPAAILKNLQSTKHNWAYQGEPEPGLGGRTITHDRGKTLGGSSSINGLCFIRGHALDFEGWRQAGCEGWGYADVLPYFKRIENYSGGGDEYRGGDGPLGVHRPAPQNPIYKAFVDAGRDAGYPITDDICGYRQEGFGVFDMSIDKGERNSTAKAYLEPVRSRQNLTIITDTQVQKILFDGIEAKGISYHRGNGDITKAYASKEVILSAGAVGSPQLLMLSGVGPASHLKEIGIPVITDIPGVGQNLNDHPDFVLKFRCLQPVSIWPQTRFIGRNMAGIRWLLRRDGICASNQFETVACVRSAAGVEYPDIQLTVSPAAVDDQTWEPLPEHAFQIHVGLMRNFSRGSITLRDTNPATHPRILANYLKDPRDRDLLRKGIRIVRELADQPSFKPLCGEEIYPGTAVQSDNELDACLEEKINTQWHLSGTARMGSSNNREAVVDPQGRVHGLSGLRIVDASIMPAATNGNTNSPTIMIAEKLSDSILGK
>c42
ASNGICAGGFAKSDERLARPDIQLNFSTWSFQARDNRGVRPHPFPGFSVSAVHLRPDARGHVRIKSPDPSAPPSILFNFLKTQYDLDALTAGMRLVRKIIEQPAIAPLVAEEILPGASVKTDADFEATIRANGISNLHPVGTCRMGPDPATGAVVDARGRVHGVDGLLVGDASIMPEVPAANTNLPVIMIAEYLAARIIAESLS
>c43
ASQFPVNQTRSYARWGHYERAKSRSNYHILIGHKAKMLQLSEDLNAEGVSIFDRESSTNLTINAKLEIILAAGATHTLQLLHLSGIGPREILDQAGIRVRVDLPGVGQNMQDHPQMGYSCVCSTHHSAARVALLGPGTDHINSGPLTLALTNQGAFLPLRTVNPGYRDFISKPTSDPVVEFRTFSNPLDMQQAISFIRYTRKYTNGPGLADLRPRESGPGENVTSDAGIEKYIWNVTYPISFHISGTASMVPKELGGVVGSDLKVYGVKGLRVVDTSLFPLIPATHLTATVYAVAEKAADIIKMAL
>c44
ASSAWESKEYDKVVIGAGSAGCVLANRLTEDPDNQVLLLEAGPKDTALGSKALMWKIHMPAALTYNLCDDKYNWYYHTLPQEHCNNRVMYWPRGRVWGGSSSLNAMAYVRGHAEDYNRWGREGAEGWNYESCLPYFRKAQTHQLGEDEYRGGSGPLHVSPLHVSRGSSGNPLHEAWLEAGQQAGYPLTDDMNGFQQEGVGQGQRWSAASAYLRPALSRPNLHTMEKVLVTRIIMEGDKAVGVELKQGKKVKRIRAGEVILSGGAINSPQLLLLSGIGPRDDLEKVGIECVHHLPGVGSNLQDHLEMYVAQQCSQPVSLLGDQKGLRMIKVGVEWFLKRTGAAATAHLEAGGFIRSRAGVEHPDIQFHFLPSQVIDHGRVAPTLEAFQCHVGPMRATSKGWLRLASADPSAPPLLQPNYLETEQDRWEMRACVRLTREIFAQAAFDKFRGPELAPGAEVESDADLDAFVRAKSDSAYHPSCTCKMGKDDMAVVDNVGKVHGLEGLRVVDASVMPSIVSGNLNAPTIMLAEKLADAIRGR
>c45
ASSAWESKEYDKVVIGAGSAGCVLANRLTEDPDNQVLLLEAGPKDTALGSKALMWKIHMPAALTYNLCDDKYNWYYHTLPQEHCNNRVMYWPRGRVWGGSSSLNAMAYVRGHAEDYNRWGREGAEGWNYETCLPYFRKAQTHQLGEDEYRGGSGPLHVSRGSSGNPLHEAWLEAGQQAGYPLTDDMNGFQQEGVGRMDASIHQGQRWSAASAYLRPALSRPNLHTMEKVLVTRIIMEGDKAVGVELKQGKKVKRIRAGEVILSGGAINSPQLLLLSGIGPRDDLEKVGIECVHHLPGVGSNLQDHLEMYVAQQCSQPVSLLGDQKGLRMIKVGVEWFLKRTGAAATAHLEAGGFIRSRAGVEHPDIQFHFLPSQVIDHGRVAPTLEAFQCHVGPMRATSKGWLRLASADPSAAPLLQPNYLETEQDRWEMRACVRLTREIFAQAAFDKFRGPELAPGAEVESDADLDAFVRAKSDSAYHPSCTCKMGKDDMAVVDNVGKVHGLEGLRVVDASVMPSIVSGNLNAPTIMLAEKLADAIRGR
>c46
ATEAAGGKYDYILAGGGTAACVLANRLSKWAPDKRILVLEAGKDNFDHPYVKIPSAIARLFKSDLDWNFTSAKQEEPGLGSNHGGVYLCRGKVLGGSSCTNVLLYNRGTANDYDGWECPGWGAKDVLKYFMRSENNHDASSSAKFHSRDGPFDVNPIQYKSVLTESFLDAGVSFGFEKNDDFNNWDRSQQGVGPFHVAQHRGVRTSAASAYLSEVMGKSNVTILTEALVKKVKLEGKHARGVHFSKAGVDATALLKDGGEVILTAGAVGSPHILMLSGIGPREHLGEHGIACVADLPVGSNLQDHPAALVTYTIDKPLALTDEFKFGGLGIPMLPNPMPILRWFFGGSGPLTSVGCDHGGFFKTDDSKAEPDLQMRFISGFSKDPYGISNYAQYAKEWWKWPSGFTFQNICVRPKSKGHVRLRSGDPEDKPVISTGYLTQPDDLASIRNGIKLSRKLARSSAFSRFNPVELHPGPNVQTDAELDDYIRASAHSGNALVGSCRMGQDPKHCVVDAELRVNGIAGLRVVDSSVIPQIPGGQTCSATLMIAEKGAEMIHGQ
>c47
ATSAWEAKEYDKVVIGAGSAGCVLANRLTEDPDNQVLLLEAGPKDTALGSKALMWKIHMPAALTYNLCDDKYNWYYHTLPQQHCNDRVMYWPRGRVWGGSSSLNAMAYVRGHAEDYNRWGKEGAEGWSYESCLPYFRKAQTHQLGADEYRGGSGPLHVSRGSSGNPLHEAWLEAGQQAGYPLTEDMNGFQQEGVGRMDATIHNGQRWSAASAYLRPALARPNLHTMENVLVTRILLEGGKAVGVEFQQGGKVKRVRASEVILSGGAINSPQLLLLSGIGPRDDLKKVGLDCLHHLPGVGNNLQDHLEMYVAQQCSQPVSLLSDQKGLRMIKVGVEWFLQRTGAAATAHLEAGGFIRSRAGVEHPDIQFHFLPSQVIDHGRVTPTLEAFQCHVGPMRATSKGWLRLASADPSAPPLIQPNYLSTEQDRWEMRASVRLTREIFAQAAFDQFRGPELAPGAEVESDADLDAFVRAKSDSAYHPSCTCKMGKDDMAVVSSSGKVHGLEGLRVVDASVMPSIVSGNLNAPTIMLAEKLADAIRGK
>c48
ATVKSCIDKNQKKYDFIVVGGGSAGAVIANRLSELKRMNVLLLEAGGKPPKLSQIPSLFFQLQNTAVDWSFSTVSQKHAFYGTIDQRSKWPRGKMLGGSSSINGLIYARGNKLDYDHWDKEGAKGWNWKNIFPYFLKLENSNLVQEDRDYHHKGGAFSVTSTEFKNPSDVAFNLAVQKLGYKFVDYNGENQTGVGLLQASIYKGRRESTYTAYLKPVKCRCNLKILTFATAEKVIFDKNKKAVAVIYTNDGNSFKAEADKEIILSAGAIKTPQLLILSGIGPKEHLNALNIKVISDLPVGRNLQDHISLFGPLFVKDENDSKFKVNVNDFIAEHFITGKSPLSELNYSMAFLNSKNSSSKEWPDIQIIKIYYPFTEYSVKLIQKNWGFSNKIMQTYIYPLIGKEVLIFLPILLRPKSRGKIKVKSKNSFEDPLIDPQYLSEREDVDLLIEAAEISYKIGTSQEFVKCGYKPAKTTLPNCNSFNYATKKYWECLVKTMTISLHHAVGTSKMGSRTNRHSVLDDELNVIGVSSLRVVDASIMPNITSANTNAVVIMIAEKASDLIKKSYI
>c49
AVGRLFKSDKDWDHTSSSENEPGLGPGHDGVYLCRGKVLGGSSCTNVLLYNRGSARDYDKWQIPEWSSSQVLNYFKKSENNHAVSDEKFHGKDGPFDVDPVQYTNPLISAFFEASHSAGYNRNNDFNNWDKGQSGVGPFHVAQHNGVRSSAASAYLSSVINDPQLEVVTGAQVSKIDIDKSSRGAGPQGKPQTKGVAKGVTFKKDGRSHSATIEEGGEIILAAGAVGSPHLLMLSGIGPKEHLQDHGIECIADLPVGENLQDHPAAVVAYTIDKKASVTDEFKFMGMSNIPNPVPFLQYLMNGKGVMTSVGCDHGGFFKTSEAKEDPDLQIRFISGLAQSPHGISNYDEYA
>c50
AVGVEYRQGGKTRRVRARKEVILSASSFNSPKLLMLSGIGPADHLKEHGIEVVHDLPGVGQNLQDHLEVWVQQECTQKITLNSWLGPLAKAWIGANWLFLKRGLGTSNQFESNGYIRSRAGMKYPDIQFHFLAGAIAYDGSSAFKGHGFQVHLGANKPKSRGWVKLKSADPEAPPEIVFNYFAEEEDKEAFRAGLRWTREIFAQPALDEYRGKEVSPGPDVQTDAQIDQWLAETAETAYHPAGSCRMGTDAMAVVDPECRVHGVRNLRVEFDYVIVGAGSAGAALAHRLSESGDHSVRVLEYGGSDNSIFIKMPTAFSIPMNMKRYDWGFHSEKEPGLKGRSLHQARGKVLGGSSSINGLVYVRGCAGDFEEWEELGAAGWGYQDVLPYFKRGEDCVYGGDAYRGDQGGLTTCNGNNMKNPLYRAFIKAGEQAGYGYTEDYNGYRQEGFGRMDMTVRDGVRCSTAMAYLKPAMNRPNLDIQTHALTTR
>c51
AVVEAAFIDDIGTPLDALGDDPSSVRDWLVARTGDYVHVAGGCVMGPKGSAVVDPTGRSWDVEELWVIDASVMPRLPRANTHLPTCMVAERMSAHLAAAISSR
>c52
CMIGCRHGAKNRLDKNYLHLAERLGVEILPEHEVVAVRPHAGGYLVEARVPGRRRRRPPVTAEQVVIAAGTRGTLELLLRMRAAGHLDGLSPRLGENLRTNSEAVVGATARSDRVDYSEGVAITSSIHPDARTHIEPVRYPRGSNAMGLLATILVDGDGSTPRWRRFVAAVAERPGAFLRSLSVRHWARRTVILLVMQAHDNALRGRLRRGRLVAELDDDRPNPSYLPVANEAARIAAELVDGDPTSSLNEVLLDAPITAHLIGGVCIGEGPDTGVVDAYHRVFGHPGLHVVDGSVIGANLGANPSLTITALAERALAAWPNRGEPDRRPPLGAPYGGLEPVPPRRPAVPADAVGALFYAS
>c53
CNQPVTLNDIARSPLLKAKEALRFALRREGLLTISSSTVQTNLRASPASTRADLLLRLQPFSGKDRYARTPKLGMDPFPGFTISIGILNPRSVGRMHVMSPDPHEQAAIDPRYLSDAHDLQMYVRGIRIARGVARQPALAPLIVRETRPGPGTDDDAAVTDYIKSTVQTSWHMVGTCRMGSADDALAVVDPQLRVHGLAGLRVVDASVFPTIPSSNTNIPTIAAAEKAASLLLGEN
>c54
CVLAERLSADPATRVLVLEAGQDPSKDMRVRVPAALVKVFKSELDWNFQTAPVQGTDRGVYLCRGKALGGSSSTNVMLYHRGTPADYEKWEAKGAKGWGPTDVLPYFRKAEDNAEGPSEYHGVDGPMPVQDVPYVNPLSRAFLAAAGQLGFRRQHDFNDWSTPQEGFGRFKVTQNNGERCSAWNAYGAGASARPNLTVRAGCHVTKIALDKAVVATGVEYKQGGEACTAKLAKGGEVLLCAGAVQSPHVLMLSGLGPKAHLEEHGVPVRKDIPGVGVGLQDHPTALVSYGSSQKVSITDEIRLFGSGYPNPLTTLKWLLFRRGALTTVACEFGGFFRTPRAETAQADLQVRFIAARAMNADGISTLEKFGAGARTTPGYTAQVVAIRPKSEGRVRMQSADPFDKPVLENVHLSNDEDVRTLREGIKLGRRLLQAESFDEYRTEEVYPGAKVQSDADIDAFVRSSVHSANALTSSCRMGSEKDPMAVLDAELRLRGVGALRVIDASVFPQIPGGQTCAPTIMVAEKAADMLLAGK
>c55
DAGILRDERDLERYVGYIENTLRLLNTTLFRNVKAEVVDLKLKMCEGLELWSKPYIRCFVRCIVATLHHYVGTCAMGSVVDSELRVRGVSGLRVVDASVMPRIVGGPTTAAVVMLAEKAADIIKYGRHISINSNQCQPQDSSYHNHETKKESEPEYFQNPHRKTKKRYRYPQYEKEMEHSQYQQTQKEVVHEVSQNPHEKTKKESDIQFPKTPAIQDKKKSDI
>c56
DFIIVGGGSAGAVLANRLSENPHWRILLLEAGPDESEASDVPVLANSLQLGRFDWAYKTEPQPGRACIGHIGGQCNWPRGKVLGGSSVLNYMLYVRGNKGDYDEWRDLGNPGWSYEDVLPYFRKSEDNRNPYLARDRRHHGTGGYLTVQEPPWRTPIAVAFVEAGVEMGYENRDCNGAKQTGFMLPQATIRRASRCSTSKAFLRPARNRKNLDIITEAHVMKVLIDKDSKQTYGVKFSRLGKMYKVLAGREVILSAGALNSPQLLMLSGLGPRHQLTSLGIPVLVDLEGVGRNLQDHYGSMGLVGFSKEPITIKEERFMNVQSMLEYAAKGQGPLSALGGVXXXXEGLAWINTKFANKSVDRPDLEIMFVSGSSASDSGTVKRVQSLTNETFYKMYAPLRDKDSXXXXFSFLLMVTRPTSRGYIELRSRNPFDKPIFEAGYFNHPHDIKVIREGMKFCIALTKTKAXXXXFRKYGAKIWEGRKIPGCEHLKLWSDEYLECLARHYTNTIYHHSGSVKMGPASDPGAVVDXXXXSRLRVHGVGGLRVVDASIMPTIVSGNTNAPTIMIAEKASDLI
>c57
DFIIVGGGTAGCVLANRLSASGEKRVLLLEAGSDKSLSSLMFRIPAGILGLFLSEHDWAFQSSAQKNASSRQIYCARGKVLGGSSSINVLLYNRGDAADYDLWETQYGCTGWGAKSVLPHFVQNQDDQSGLAAKNPKHHGTGGMWTTDNVRYQNVLSRTFLAACGMVGIGQNDDFNDWSKPQAGAGRFLVSERNGARCCAATSYLTAALGRKNLTVLTGVYARKLVIKKNTCTGVQFALGKDSSATFEAGIAADGEVVCAGGAVQTPQLLMLSGVGPKAHLAEHGIPLVLDLPAVGQNLQDQPAGVVSYAVKPEFKGISSSSDARMPNTVYPNPRSVLQWLCARRGVGVLTSTGCDHGAFVPVANEASPRLQLRFLATRAVTADGMGSFTTFRKTPNHPDGFSVQAIAARPKCRGSIKLRSANPEDRPLLDYDWLNDEDRATIREGIRLGRQIAKTAAFEKYKAEEVFPGEAIVTDAQLDEYLDQSVHSANALVGTCRMGPKEKDTVVDSALRVHGVAQLRIADASVFPQLPGGQSGAPTVMVAERASEFL
>c58
DHAQVMLQFNSKANFTAYGFNAIASSPVPADLDLYKQGSGPITQAAQRMHLWTSAKGADGRTRYLQGTASAMASGVVTVRTFLTHGTSTLGELGITAAGNTVLNTKPWLIDAEDRKAMADFVQFWLDLTAGANSTLSYVTPGATPDDIIGTKMISGDHWVGSARMGVDDGRSANGTAVVDLDTRVYGTDNLFVVDASIHPDLPTGNTQSIIMITAEHAAEKIAAFKVSGSGNSTAPEASDCEGAAAKRRSARRSMRFRRRAHLH
>c59
DHIIAGAGPAGIIVAERLAEAGSKVLLIERGNASLWLSGGNRLMPWNDTVTIFDVPGFDYELTDLSDQSEYCTDTPWTTGWSALAGCILGGGTIVNGLLFVHPPKHDFGTWPKGWTWDEGVSDAAERVYARNPGTEYPSMNGKLYDQTVWNLFSELLEKNNYTYANSIEHPDAKYMVYGHPPYNIIGAERAGPVRSYLPLAERYDNFELLLRTYVVRAVRENSTVTGVEVEVNGTRSIIQVNEGGSVIFASGTLGTPRLLWNSGIGGTNMIEIVKNGDTNVTLPEESEWIDLPVGTNFQDHVIFTLLFNTTKSPFKYYDWGSLVTDDYDVDNTSFYSHTGSGLFAQGPHRLMWFNEYVAEIDNITRFVEVTVAPTADNQITMYAYLTHGLTSHGILGIAANGSTTFVQEPWLNTAGDREIGAKLIDDILGYIAAQDNLILVNYNSSATGAEIIKNRISGRHLTGSAKLSQVVDVDTKVYGMDNLYVVDASIHPTPPTGNSQAIVMVVAEHAAKRIVAQTG
>c60
DHMLNSGAGGRVEGFEDKYIFGRRANGLYVPRFANIAGDTKRRDYVRGFGYQGGASRGQWSGKVDNKSVGGAWKDAIAEPGSWGVGFSAFGEILPYHENKVLLDSSVKDKWGLPVLAIDAEIKDNERKIRVDASNEMKEMLESIGVKDVTTYDNGFSMGQGIHEMGTARMGNDPKTSVLNKFNQVWDAKNVFLTDGAFMTSSSCVNPSLTYMAFTARAVDFAVNELKKGNL
>c61
DHRVINVSKKFPEEPKALGSNLDTNSGFQWGVGYSQSTIRNGPRSSSATSYLADEFIRRPNLHILLHSHVTRILPEKEGSLEFARVEFSQDGGKNLRTITAKKEIILSAGTIGSPQILSLSGIGDTIELSSIGVPTLKHLPSVGRNLSEQPVVQSSFRVNTTDTGDTPFQNQTVADEEMKLWLEQKKGPLANGPLLDVGWLRVPVEEGVVDPAGDSKTAHLEIQFI
>c62
DKRFNWCFKTEKNKNVNNREILFPRGKGFGGSSSINGHLYVRGQPDDYNQWSQLGNYGWSYDDILPYFKKSESKENGSADTRGKDGPLFVSDIVEKHPICEEFIRGSRELGIKIQEDYNSGDQEGIFYYQRTIKNGARYSAYDAFLKTAIKRKNVDVKKNTMVLKIIFEGKKAVGLVCEKNNKIFQIHANKEIILCAGAIGTPHLLQVSGIGNFEHLNEIGVKPVHENKNVGEGLQDHYAVRVANRINLPNSLNEKASGYKLALEIIKWFMFRKGLISYSPAXVGAFLKSSPXIDXPDLQFVFTPASYTEGMIGKLQDHPGITCGVWQSRPQSRGYIRAXSNNIKIXPIIQPNYLKEKIDXDILXEGVKMCRKLLKTSNIEKISVNETLPGEHVKTNNEILNFVRNNGATVYHAIGSCKMGVDQSAVVNPSLKILGLENIRVADASIMPTMPSGNTNAATLMIAEKASDLIKKDLN
>c63
DLSKYLFLPPERLAWSSFLARQRNTESYHDKVPMLRDVSSGDLGLGVLSMTSYDGLRVTADSAYLSDVPSNLIIRTESPVARNLFDRKKAIGVELTSGTQYFATQETIISTGAIDSPKILLLSGIGPQDELAELGIPVTSVRPGVGNNFKDKCMVYLKANLQPGTVPSISMNDVAGWQQQWEEDRTGSMVVEPCRVATGYFKLDNLKTFAEFQQLDEQAKQLLMRPRTPMYEIAPVSEINAMAGIFADPTTGGSFFRDACHLDAPSINGKISLRSSDPAAAPIIQLDYLKNPYDRRVLVESTKKVIDFIYSSKIPAVEPIVGLTAICSKLPINRLAPQGTVKMGKLDDETACLGSDFRVIGIENLRVADLSVVSVNLSNYTQAGAYVIGEIATQKLISTNGL
>c64
DLYSSQIWARRLKWATPHVDEFGGPDRIHFNMNAGRGYGGAAIHHYGVWPRLDEDDFRLRSKFGRGLDWPISYADLRPYYDRVQDFVGLSGDASREPWRPPGADYPLPPIPVFRHAELLGEGFARKKIPVSPIPITVLSQPYRDRPACLWDGWCDAGCPIGAISNPLMTYYPRAVAASATFQADSHVTRVLTDPSRSRASGVEYVDGSGQRKTIEAGLVILAAFTVENTRILLNSAEGGLANRSGTLGHYLMVHPAVAVFGMYEEETQCHVGASGGHLYSARPDKTGNPGGVFGGRHWEIGLVVKPNDLLGVSMTRPDIHGQALHDFMRKGSKRMAAMAAICEDQPQEDNRIVLGETKDEFGMPEARAIYRVSPDGRSLAEQARAEGLDIIRASGAVEAWSGPIAAQHIIGGTLMGKSPEDSVCDGYGIAHEVGNLLIGGQSTFPTSSHANTTFTIHALAERSSDHLVENWDAIV
>c65
DNKKVIGIEIENSKTKAVSKILSGREVILSGGAINTPQLLLLSGVGDADHLNEFACKQPVTLYHATKRFPGKVLRIGYEWMTSKTGPGATPHCEVGGFIRTSQPDLQIQFSPGAVDEHYQLREIGHAMSGHISLMRGSRNGTVKLRNANPREHPIIDPKYMAEEESRVTLRKGVKLTREIFAQNAFKEFCGEGISPRDDVQSDKEIDAWARKYVATEFHASCTARMGVDDNSVVDTQTRVHGLEGLRIVDASIMPNIVSGNTNAPVIMIAEKAADMILGKPALPKTNAPVADPNNKVLLVEAGPSDRNRWDSFLIEMPAAVPINLADERYNWNFSTEPQEFLNNRRIRYPGGRVLGGSSSLNAMMYSRGHAKDYNDWETNGAKGWSYADCLPYFKRSENHELGGDDYRGGDGPLHVVRNTQKNQPLFQAFLDAGVQAGYPFTSNLNGYQQEGFGWHDLTIHEGKRWSTSAAFLHPVMHRKNLTVITDTYANRVVFNDKKAIGIEVENIKTKTVSKILSAKEVILSGGAINSPQLLMLSGIGDADHLKEIGVPLIHHLPAVGKNMEDHIGVNLQFACKQPITLYNASKKYPRNVLKIGYEWLTSKTGPGATPHCEVGGFIRTVCTVHLVSPSQIFRSFSVLVLLTSAASFAKTLVMQ
>c66
DPMAKPILEGVHLSSAADTATLREGIKLGRKLCTAPEFDQYRTEEVYPSASVQSDAEIDAYVRGSVHSANALTGSCRMGGDHDSGAVLDAELRVRGVGSLRVIDASAMPHIIGGQTCAPTIMMAEKGADLV
>c67
DPNAAPHIAPNYLSTDQDRQVSVQSIRHARRLMATKRMAQFCPVEFAPGAEITSDEALAEAAGKVATTIFHPVGTARIAHRDDPMGVVDHRLLVRGFSNLRVVDASVMPSIVSGNTHAPVVMIAEKASQAILEDQKG
>c68
DPYFGGEGPPRTGCTRCGACMIGCSVGAKNTLDRNYLWLAERLGARIVPETLAVEVREADGGYEILSRSLRRGSSTRTWRVRRVVVSGGVVGTVKLLLRSRARGGLPRLSGQLGRWVRTNSEAILAADGRRGGDSWVDHAAITSGIQADARTHIEVVRFNEGSDALFWLTAPLPSGRRDLPGVVRLLGARVRHPLRSLAGLWPLGRARRTAILLAMQSTEGHLTLEHRRGWWGLGRARLATRVPEGETPPVPSIPLADEVARRLARAMGGAAWTTWPDVALGAPLTAHILGGCRMGADAERGVVDFHGEAFGHPGLYVVDGSIVPANLGVNPSLTITALAEHVMSGIPENVA
>c69
DTPDGRVRLLGRRRPKLNLDWRMKRSSRFFEQASAAGEELAAAVGATFHDSLHRRLKRSITVHPLGGCAMARSPEQGVVDAWGEVFHYPGFFIADGSVMPGPVGPNPALTIAAVAHRFADRVIANHRKGRLKPMLGRTVKFDRQPPALPTQIRFAECMRGFVMRGAQPFAQAYRAGRAAGTELEMRLKVRIPDLAAFLANPEHGAVVSGKVSIPNLAALVNEKEPDAELDTELRVERGVLNLWVDCGSPAEKEMRYCLFLRDSERRAFTLYGFKSAPNGMPLGDTTTLFTQLWAGHHAPPCALADVLAQDVTTWSDGGGKVSAARNPIYGRENVIRLLFGTLQKAGTIRASLLELNGGPAIVLFSDDTIVSATTFTIVDGCILGMHIVRNPDKLGYLEQQLRVIGE
>c70
DVAVVSGYAAVTQPESRGNIALASANFHDAPTINSQYWSTPAEKAAILHAYRQVREVFKSKAMAQYVTSELYPGANVTSDEGLWAAIQRTSSSWHHPVGTTSLGTVLGADWRVKGLSGLRVVGSSAAPQIPTCPIQASIYAMAYIAAADIKRDDKL
>c71
DVLPHFLRSEDDQTDNWKTDKKHHATGGEWAVDHVRYQNPLSKLFLEACEQAGIKKNDDFNNWARPQEGAGRFTVSQRNGTRCESAVAFLAPAVADSSRSLKVLAGTMVNKINFDDSAAATGVQFNVGGFDHVARLAPRGEVVLAAGALHSPHLLMLSGVGPKAHLQEHNIPVIADLPGVGKNLQDHPAAVVSYQCPASKKGISVTSKLRIGGTTLPDPRPMIQWLLFRTGPLTSTGCDHGAFVKTSAATDKNPDLQLRFLAARAVSADGMGTFASFKKTTNHPDGFSLQSIAARPGSRGRVLLTSADPADKPVVEGNYLTDKKDVATIRAGLKLSRKIAEQPAFKEHISHEVFPGPHVKTDAQLDAYIADSVHTANALVGTCRMGEVTDPETVCDSEMRVKGVSRLRICDASIMPALPGGQSGACVVMIAERAADMIMG
>c72
DVVIIGGGIAGLATAYYLSQKQNLQIILLEKDSIPNPNNSSYDKSKVSIKYIKYIYSNM
>c73
DYIILGGGSAGCVLANRLSEKSNNNVTLLEAGSGDRNVWDWWKIHMPAALTYNLESSKYNWMYSTTKQEGLNGRSIGAPRGKVLGGSSSINAMVYIRGNKEDFNRWANEEGATGWSYEACLPYFLKSQTHADMLNSNKNNKKDTNVIDENSNFENEKRYKGIDGPLHVKTVQKSEFQDLFDVFVQAGLDAGYPYTSDMNGENQQGFGPMDMTIAPNGERCNTANAYLKPIVNQRQNLKIQTNSHVNRIIFDDENNDVKPKAVGVEYFNSKTKAVETMYARKEIISSLGAVGSPTLLLRSGIGNGEMLKAIGCENVIVNNPHVGQNLQDHTEVYLQYKCKKPITLYPLSSWSYARIKAGLEWFLFGTGICSSNLFHTGGFICTDPKKISHPDIQYHFIPGAVIGQSEFLPIHAFQVHVGTLRPKSQGYVTINSMDPNVAPIIDPQYYKHPNDIEDMRIALRHAENIVSQPAFSDYRAERLSPPGINIMQDDEAVDKFIRENTHSAYHLSCTCKMGDEENGPNVVNTKGQVYGVDNLRVVDASIFPSMTSGNLNAPTIMVAEKMADII
>c74
DYIITGGGLAGCLLADRLTADGTKKVLVLEAGTPDYNAMIVRIPAGILRLFRNTKYDWQHETGGEKACNGRNVFLQRGKVLGGSSCTNVCLHHRGSAQDYDDWGVPGWKAADVLPFFKASQKDMTGRSPEFHGVDGDWVMDDVRYQNPLSKRFLEVGEKAGLGTNDDFNNWGRTQEGVGRFQVSEINGERCSGANAFLTKAMKNKNCKVRTGTMVRRINFDQSKTATGVTYDLMGDDTMKLNPGGEVIVTSGAIASPQLLLCSGIGPSQHLKDHGIPVVHDNPNVGENLQDHPAAVVSFKTPVKGVSVTSKLRLFGMTNPFPILQWLIFKTGLLTSTGCDHGAFVRTSASIKGQPDLQIRFLAARALGPDGMTTFTQFRNSKSHDDGYSLQSVACRAKSQGSVRLVSSNTHIKPAIDGGYLSDPNDLKTLREGIKLGRQLGNSPDWGEYLGEEVYPGLDVQTDAEIDEYIKNTIHTANALTGTCKMGTGKDAVVTPELKVIGVNGVRVADSSTIPILPGGQTATPTVMIAERAAAFLINPHQSVTTTTEVIMEDNVDTPEPAMAAA
>c75
DYIIVGAGSAGATLAARLSEDPRVTVLLLEAGGPDRALELHVPAAFKKLFRSAYDWGYDTVTQPELEGRRIFWPRGKTLGGSSSLNAMMWVRGFAADYDEWAEAAGERWSWDAVLPVLRRIENVQDAVDSSLGRSGPQTVEGQRDPRPHTAAFLEAARELGYDITEANLPTGQGFSQTMVTQHRGARASTADTYLRPAAARPNLRVVTNAHVRRVTFADASDGEPRATGVYVDIAGTTRHARARREVILCGGAINTPQTLMLSGIGPADELAEVGIRTLVDSPEVGKNLQDHLVAGLAPAAIAGTLYGAERPSELLRYLATRRGMLTSNVAEAYGFVRTDVASRAGMPEGLPDIEIIFAAAPYVGEGLVPLPGEGITVGAILLRPRSRGSIRLASSDPHTHPLIDPAYLSDPEGTDAATLHAGLEVCERLIATSALGAVTTGSWVQPEGGERMTSAERIELSMRRYSHTLYHPVGTARMGTDAASVVDPKLRVRGVSGLRVADASVMPTIIRGHTHAPAMVIGEIAADLL
>c76
DYIIVGAGSAGCATAFRLCEAGHKVVVLEYGGSDRSALIQMPGALSYPMNMPRYDWGFTSEPEPFLNGRKLACPRGKVVGGSSSINGMVYVRGHALDYDTWSEMGAAGWAYADTLPYFKKLENWNSAGHGGDPTWRGNSGPLHVTRGSRSNELVKAFVNAGHEAGYEITEDYNGQKQEGFSPMDQTIFKGQRWSAAKAYLRPAIKTGRCRLVSGFARKILIEKGRATGVEYDAKNKTKAILHAHKEVILSASSINSPKLLMLSGIGPAAHLKEHGIKVLADRPGVGKNLQDHLELYLQMAASEPITLYKYWGLLGKAYVGLRWLISRTGPGASNQFESAAFIRSKAGVKYPDIQYHFLPLAVRYDGKVAVKGHGFQAHVGPMRSPSRGSVTLKSNDPYDQPAIIFNYMSSEKDWEDFRRCIRLTREIFRQPAINKFVKYEIQPGETLQTDDELDNFISQNVESAYHPCGTCKMGDINDPMAVVDKFTQVIGVKNLRVVDSSIFPQITNGNLNGPTIMVGEKASDHILGK
>c77
DYIIVGAGSAGCATAFRLCEAGHRVIVLEYGGSDRSPLIQMPGALSYPMNMPKYDWGFFSEPEPYLNGRRLACPRGKVVGGSSSINGMVYVRGHALDYDTWSEMGASGWAYADILPYFKKLESWNSAGHGGDPAWRGKSGPLHVTRGSRANKLVKAFVNAGCEAGYEVTDDYNGRKQEGFGPMDHTIFHGQRWSAAKAYLRPAIKTGLCQLVSGFARKIIIENGKATGVEYDGTSQAKAVLTASKEVILSASSINSPKLLMLSGIGPAKHLKENGIEVLADRPGVGQNLQDHLELYIQMAASEPVSLYKYWNLLGKAYVGLRWMISKTGPGASNQFESAAFIRTKAGVKYPDIQYHFLPIAVRYDGKAAVRGHGFQAHVGPMRSPSRGSVSLRSNDPYDHPAILFNYMSTDKDWDDFRRCIRLTREIFEQPSIKKFIKYEIQPGDSLQTDDELDEFISQNVESAYHPCGTCKMGEISDPMAVVDKFTRVIGIEKLRVVDSSIFPQITNGNLNGPTIMVGEKASDHILGK
>c78
DYIIVGGGTAGCVLAARLSEDPDHSVLLLEAGDRDHHPEIHIPATFSRLFQTDADWNYHTEPQAGAANRALYWPRGKVLGGSSSINAMIYIRGHHADFDGWAADGCDGWEFADALPYFKRSEDNVRGASAYHGAGGPLRIEDPKDPSPVSLAFIEAAVAAGMPRTADFNGEQQAGAGLYQLTQKAGRRASAATAFLKPARRRQNLTVRTGALVRRVVIEHGRAVGVEIVQDGRIETVYADREVIVCGGAVNSPQILMLSGIGPADDLRALGLDVVVDRPAVGDNLHDHLITGLHFALREPVSLVNAESISSVLRYLVTRRGMLSSNIAEAGLFVDSHGAGGVPDLQFGVPDLQFHVAPILFQDHGLTPPTDHGFSIGPTLVRPKSRGRLTLRSADPTVHPSIDPAALAEQADVDVLVAGLRLAREIAEAGPLDRFRGEMLLPGPASFDTADLERHVRETSETLYHPVGTCRMGADADAVVDPDLRVRGVEGLRVVDASVMPTITNGNTNAPTLMIAERAADLI
>c79
DYIIVGGGTAGSLLANRLTSGKAAGKRVLVLEAGSGDYNHPMVKIPAGVLKLFQGDKDWNFTSTNEKQTSGRGIYLCRGKILGGSSALNVLLYTRGDKHDYDIWESEYGCVNWGSTDVLPLFKRTQDDLTGCASKNPKHHATGGEWAVEHVRYQNPLSKLFLQACQQAGLPLNDDFNDWSKKQEGAGRFPVSTRKGVRCDAASSLLAPAQADATRQLKVLTGAHVRKIXXXXXXXXXXSRLAPGGEVLLTGGALHSPQVLMLSGVGPQKQLEEHGIEVIQNLSGVGENLQDHPAAVVSFECPQDQRGISVSSKIRIPNTTLPHPAPMLEWLFRKTGPLCSTGCDHGGFFRTSAAPQDSPSCDLQMRFLAARAVTADGMGSFTKFKHITNHPDGFSFQSIAVRPKSRGRVTLASADPDMKPIVTTNYLTEEEDLATIREGIRLGRELAKQPAFKDYLGPEVFPGSHVQTDKELNAYISDSVHTANALVGTCRMGRTDDPLAVVDSDMCVIGVRGLRICDSSVMPKIPGAQTGACTVMIAERAA
>c80
DYLVVGAGSAGCAIANRLSADPGVTVTLLEAGSWDWNPWIHIPVGYFKTMNNPSVDWCYRTEPDPGLNGRRLEWPRGKVMGGSSSLNGLLYVRGQPQDYDRWAQMGFSGWSWDDVLPLFKRAENQERGADDYHGAGGPLNVSDMRLSRAICDAWVTAAQAAGFPFNPDYNGAAQEGVGYFQLTTRKGRRCSAAVAYIHPIRKRPNLRIITRAATRRVVIEDGRAVAVEYADRSGKTQRIEVKGEVILSAGAIGSPQILMLSGVGEAAHLAEHGIPVAADLPGVGQGLQDHLQARLIYTCNEPTLNDEVRKLWQQARIALKYAMFRAGPMSMAASLATGFMRTNDRVATPDIQFHVQPWSADSPSQGVHPFSAFTMSVCQLRPESRGSIRLKSADPSVYPAIHPNYLATETDCQTIVDGVRIARRIAAERPLSGKITGEMRPGPEVRDDAALLDWVRNSATTIFHPTGTAAMGPVLDDRLRVKGIRGLRVADCSIMPEIVSGNTNAPAIMIGEKAADLL
>c81
DYVIVGAGSAGCVLANRLSADPAIRVVLLEAGGRDWNPWIHIPVGYFKTMHNPSVDWCYKTEPDPGLNGRSIDWPRGKVLGGSSSLNGLLYVRGQPQDYMRWRQMGNPGWGWDEVLPLFKRSECQERGADEYHGTDGPLSVSNMRLQRPICDAWIAAAQAAGYPYNPDYNGAVQEGVSYFQLTTRNGRRCSAAVAFLNPARSRPNLQIITRAHTQKVLVEGGRASGVVYRDEAGALHTVRAEGEVILSSGAIGSPQLLMLSGIGEASQLREHGIEVLRDVPAVGKNLQDHLQARLVFKCNEPTLNDEVRSLVNQARIALKYALFRAGPMTMAASLATGFMRTAPHLETPDIQFHVQPWSADSPGEGVHPFSAFTMSVCQLRPESRGEIRLRSADAGAYPAIIPRYLSTELDCRTIVEGVKIARRIARHAPLTSKISEEYRPDRTLDLDEYDGTLDWARNHSSSIYHPTGTCRMGPEPGAVVDARLRVKGVQGLRVADCSIMPEIVSGNTNAPAIMIGEKASDMI
>c82
DYVIVGAGSAGSVLANRLTENPNHKVVVLEAGPKDYSWKIHMPAALMYNLGDDKYNWFYHTLPQKHMDNRIMYWPRGRVWGGSSALNAMVYIRGHAKDYDRWVEEGAKGWSYAECLPYFKKSQTHELGEDDYRGGDGPLHVSRGKTNNPLFQAWIDAGVEAGYPFTDDMNGYQQEGVGLMDMTIHKGVRWSTASAYLRPALKRANLSAMTRVMVTRVLLEGGRAVGVELVDKRGRMKTIRAAKEVILCGGAINSPQLLNLSGIGDADLLKKVDVELTHHLPGIGRNLQDHLECYVQQACTKPITLYSAQWKFPHNMVAIGLKWIFTQKGWGASAHLEAGGFIRSEAGVPHPDIQFHFLPSTIIDHGRKTGFEHAYQVHVGPMRGTSIGQMWLKSKDPREHPLLDANYLATERDRWEFRQCIRLSRDILAQKAFEPFRGRELAPGDQAQSDQEIDAYVRANADSAYHPSCTCKMGSPDDPLAVTDHVGKVFGLDSLRIVDASIMPSVVSGNLNGPVVMMAEKLADAIQGK
>c83
EAGQQAGHAVSEEINGFRQEGVGPFEMTIKQGKRWNTASAYLRPALQSRPDRVSVKDSVLVHRVLFEGKRAIGIELINSNKEVEKVYANEIILSGGAINSPQLLMLSGIGDADHLKSIDIPVVHHVPGVGQNLQDHLELYIVQKSKKPVTLLSDQKFPRMIQVGIQWFLNQTGSCATTHLESGGFTRSRPGVPHPDIMWHFVPSHVIDHGRQTPSHEAYQLHAGPMRPTSRGWVKLKSKNPKDHPIIQPNYLSTEIDRWEMRESVKLSREILAQKAFDEFRDIELEPGDDVQTDEQIDAFVRAKSDSAYHPSCTCRMGSSSDNDTVVSAEGKVMGVEGLRVVDASVMPQVVSGNLNGPTIMVAERMADLIKGQ
>c84
EAMKLDYFVRHYADDAQQKRDPKYRAQWNGQNVDGVLYPRAGTLGGCTAHNAMITVYPHNADWDNIARLTGDDSWRADTMRGYFERLENCHHRPLYRWLGLLGVNPTRHGWRGWLQTEKAIPESALGDAGLDIGDVADASARLQRFSPYIRRAFPETADNGGIIESPLLPAAAFQQALERRYGMELPGRL
>c85
EAWDYIIVGGGTAGCVLANRLSAADKKVLVIEAGRSDYDHMLVKIPAGVLRTFKSVYDWDFTSQNEKATSGRGIYLPRGKVLGGSSCLNVCLYQRGDANDYNLWETEFGCDGWAACDVLPHFKRSENDQTGLAKTDPKHHSTGGEWSVDNVRYQNPLSKTFLSACKEAGLPDNSDFNSWGHKQEGAGRFCVSQKGGSRCSAATAMLEPALAKGDRKLKVLSGAPCRKIVFGEGNVVKGVLFKAGGAEHVARIAPKGEVILAGGAIHSPQILMLSGIGPKKHLQDNNISVLVDSPGVGANLQDHPAAVVSFECPQSCTGVSVTSKLRIAGSSLPNPRPLLQWLFTGSGPLTSTGCDHGGYFRTSAAGKDNNSTDLQMRFLAARAVTADGMGSFTSFKNSSNHKDGFTFQAIAARPRSRGTVSLKSSNPDDKPIIQLNYLTDKQDVATIREGIRLGRKIAQQNSFKEFVGEEVFPGKNVQSDADLDAYISDTVHTANALVGTCRMGKADDPDAVCDPEMRVKGCSGLRVCDASLMPKITGGQTGACVVMMAERAADMVLGK
>c86
EDYDFIVIGAGSAGAVVANRLSEVEGWNVLLLEAGGDETLMSDIPGAAKYLQLTDLDWQYQTEPQPGACLGLKDQRWPRGKVLGGSSVLNYMLYIRGNRRDYDSWAAMGNDGWSYADVLPYFVKSEDNRNPYLANSPYHGTGGYLSESTVSRFPTRWPLSTAFLAGAVEMGYAVRDVNGESQSGFMTPQGTIRRGARCSTAKAFLRSVRNRPNLHIAMRAHVMKVLIDDQNRAYGVRFQRHGQVYEVAATREVIVSAGAIGSPQILMLSGVGPADHLREVGIDVKADLQVGENLQDHISGRFMVTLINTNVPSGLKWAVDQDGPFTALSGTEGLGWIKTKYADADDDWPDMQLQFIAGSVISDGGVTLRRNDGVSDELWNEYYEPISYRDSWSAIPIVLRPHSKGYLRLKSANPFDKPLIYANYFADERDLQVRLECVKFGLALSKTEAFQRLGSQFYDKPFPGCEHLPLWTDEYWGCCLRHYSTTLYHQAGTCKMGNASDPTAVVDARLRVYGVDRLRVADASIMPNVVSGNTNAPCIMIGEK
>c87
EEADGTNYDWLRGYHTAGRSIMWSRQTYRMGPQDFTANKEEGVGVDWPVRYEEIVPWYEKVETFIGIAGSEEGLSQLPDSVFQPAFELTDAEKSFKQKIETTFNGRNVIPARIAHLTDATEEQRSLGRSNCQSRNRCHHGCTFKAYFSSLNATLPAAERTGNLTIIHNAIVKGLDYDPASNRVSGVQVIDAETNERRTYTSKVVFLNASAIASAIILLQSKSEAFPTGLANRSDQVGRNLMDHVSGAGVAGIMTGFDDKTVFGRRPSGGIYIPRYANVTENDKPYKRGFGFQGGARPLGNAGGQIAGIGRDFKEAHKRPGPWRFSVLAFGEQLPNPDNRVTLHASRRDRWGNPVPIFNVTYGENERIMQREAVKDAKAMMEAAGCINITSNDANLSKPGNRIHEMGSARMGRDPATSVLNGWCQAHDAPNLFITDGAFMTSSACQNPSLSYMAFSARAANYAADLIAEGAL
>c88
EEFDYIVIGGGAAGCTVARRLAEAESSQEEMMMSGSADVATTRTKRKKKKILLVEDGADNRAQVVRTPAGILRLFRDERRDFAFMTEPEAKLHGRQIYLARGRGLGGSTATNAAIYHRGTALDYDAWGLAGWSADEVLPTFLRSEDNLRSGLAASSRFHATGGPQAVEDPRYENELVHRFVRAITEVEGIDEKDDFNDWDTTQEGAGRFQLTLRGGRRCDAWNGFLESSARGLDDVLEVRTRTRALRILFEGKRAAGVELADTPERVAEGLSATPYVARLSAQGKVICCAGALHTPHLLMHSGVGDRDTLGEHGIDMTHHLPGVGRNLQDQPACVSTFSVLKRGMSVTDHVYIRGNGTPHPRAILNYVLRRRGPLSSTGCEQGAFLRTRADLAQPDCQVRFIAAFSLDPDGVSTYTKFGQLKASGQGWPPGVSFQIIAARPKSRGFVTVGGANPMVDRPRVSPCYLSDAGGEDIATMRRGLEMSRKWISGSSAWGEGVVGEEAFPGPNEHDLDDYIRRTLHSSNALVGTCRMGDVGDDGSSDGIVVDASTLAVCGIEGVHVADASVIPVIPGGQTVAPTIMVAERAA
>c89
EEGEDIRCKPQWHRSLACSLYAHRFADRGYESHKNVTVPQRTHRESDSLAPVMIPTPRVLGGGGVMGGRSWLIGNESDWAESPWNFRSDLLPRVQRLENVENAEPHRGRRGKFTISRPQAQSPLFRTFCEAMSKDTALTSEFNNKSFKVRAGCGRSESLIDPRTGAAHNTLQGYLMDAVKLRRPLDVICGARVFSINSRQGDKKTATGVSYTLKGVTTHVEADNVVLCAGGLGTPSLVSESRSALSVLPSFGTNFWDVPQVTMQFSTPTSLSHNCFMDPLVQKFLWLNVTCGTPISALCSAYDDMFCYWSSVEGESPDVRFVFQPFTLNNDGTRPKGVAHGVQIIAQLLRPKSRGSIRDDGAIDPRYLTHPDDAAALNRAVERVKELLNMLPFSRFLSEMVAERFESAGVCGGASYPALDPETFLLKNMRNVYVCDGSILPSPLAGTSLPYLLALGESFTDRFVKNFSFGVDGTAVKEDSRSTRIIY
>c90
EETFRRLPSEADRRRIRLIVGVLGRRSGTFLLTGRPVPFHRWPRERRVRVMSSWSTSRLTFRRQLFQVFKRLSLLAFLGDTEDDGTNPVWPEIGYPGPVSAPPATPKSIRTTTLDGDTTLSCDAVVVGSGAGGGVVAAELAAAGKDVIVLEEGGYYNEADFDQLELAMRRKLYYQGGFAATADAAIALIAGGCLGGGTVVNYTTSFRSPDWLREEWATRYGLEAFTTDAYSASMDAVYERLGVNTNHSRVSARERVLERGMKRLGWHSDYMPRNVQGCTQDERCGFCGYGCQIGAKQSTLKTYLMDAYHRRARIVVNCTVDRVVIEDGRAVGVRATVRQPDMPAFTLIVRSRAVVVAAGAIGTPAILQRSAVPSKVIGTSLRLHPSTAVSGIFDEEIRPWEGTLQALYSDEFTNLDGLHFGPKIESAPLHPALLALVTPWRKPDEYSRLMRSLPNLSLTGILLRDSGAGRVVTKNGATRVEYRLSRPDLAHMRKGIEAGVRILEAAGAKEIFTSQAAYVSYRPGQRGGVEAFMDDVDRHGYGPGQMGYVSFHQMGTCRMGNDPATSVIGPDHQVHVVKGLFVADGSAFPSASGVNPMITIMAMAHRASRFIA
>c91
EEVDFVVVGAGTAGSIVAGRLANTKEQWKVALLEAGGPYPTGTMIPGTYFSYTKPDVAINWNLPLEPETTSCLGHKNGQCRIPRGRVLGGTGVLHGMMYMRGNPYDYDKWAKEGSKGWSYEEEDHGTSGPVTISQFRHHPDIAWSLLQAASQLGFVVGHDLNGKSQIGFTLAQATTHNGSRTSLYNAYIVPLLGKAKNLVVTKILMNGTRAIGVEFIKNKKTYRVYARKEVIISAGALHSPHLLLLSGIGPQQHLNQMKNHISFSVKFKLKKNFADVLNEDGLREYLNKREGPLSSTGLSQGFLANCSHGDKNKKATYITITPALLRPKSKGSVSLRSSNPYDTPMIKANYLASEEDMETLLDGIRLALRMSNTTALKNMMEIDIPPTSHCKDAFGSDAYWRCAIRYWNNPENHQLRVHGLKRLRVIDASIMPHVVSGNINGPTMMIAERGAEFIKKQMGLLVKTTNTVLYLRSKSEYSLLPVENDIAYVRIII
>c92
EEWDYIILGAGAAGCTLANRLTEDPSIRVLVLEAGDDASNDLKVRIPAMLIKVLRSEMDWNFETEPDDAGTPHGVYLCRGKTLGGSTCANVQLYHRGTETDYKSWGAVGWGPKDVLPYFRKSESYHGGADKYHGADGPITVSQVPYFNPLSAIFFDAMGELGHRRTHDFNDWSSPQEGFGRYSVTQRNGERISAANTYLKQARGRPNLVVRTGAHVSRLLLEGAADLTTTGVSYLQSGNEKAAKLAAGGEVLLAAGAVQSPQILMLSGIGPRAHLEDHGIQVRKEVDGVGQGLQDHPAVLVSFESKLACSLTDHIRLWGTSLPNPLTLLNWFVRGKGALTTVACEQGGFFRTTPDKPQPDLQMRFLPERSMSPDGMNSLQKMGSGAIAKSGFTFQCLACRPQARGRVRLRDANPLSKPLVEGLYLSQGSSDLATLREGIKLGRRVCQTKAFEGVRGEELYPGADVVSDEAIESYVRNTIHSANALVGSCRMGAAAD
>c93
EEWDYIILGAGAAGCTLANRLTEDPSIRVLVLEAGDDASNDLKVRIPAMLIKVLRSEMDWNFETEPDDNGTPHGVYLCRGKTLGGSTCANVDLKVRIPAMLIKVLRSEMDWNFETEPDDNGTPHGVYLCRGKTLGGSTCANVQLYHRGTETDYKSWEQAGAVGWGPKDVLPYFRKSESYHGGADKYHGADGPMTVGQVPYFNPLSAIFFDAMGELGYRRTHDFNDWSAPQEGFGRYSVTQRNGERVSTASTYLKQARGRPNLVVRTGAHVSRLLLDGAADLAATGVSYLQSGNEKAAKLAAGGEVLLAAGAVQSPQILMLSGIGPRAHLEDHGIQVRKEVDGVGQGLQDHPAVLVSFESKLVCSLTDHIRLWGTALPNPLTLLNWFVRGKGALTTVACEQGGFFRTTPDKPQPDLQLRFLPERSMSPDGMNSLQKMGGGAAPPKSGFTFQCLACRPQARGRVRLRDANPLSKPLVEGLYLSQGGADIATLREGIKLGRRLSQTKAFEAVRGEELYPGADVVSDEALDSYVRNTIHSANALVGSCRMGAAADPLAVLDPQLRVRGVRALRVVDASAMPRIPGGQTAA
>c94
EEWDYIILGAGAAGCTLANRLTEDPSIRVLVLEAGDDASNDLKVRIPAMLIKVLRSEMDWNFETEPDDNGTPHGVYLCRGKTLGGSTCANVQLYHRGTETDYKSWEQAGAVGWGPKDVLPYFRKSESYHGGADKYHGADGPMTVGQVPYFNPLSAIFFDAMGELGYRRTHDFNDWSAPQEGFGRYSVTQRNGERVSAASTYLKQARGRPNLVVRTGAHVSRLLLDGAADLAATGVSYLQSGNEKAAKLAAGGEVLLAAGAVQSPQILMLSGIGPRAHLEDHGIQVRKEVDGVGQGLQDHPAVLVSFESKLVCSLTDHIRLWGTALPNPLTLLNWFVRGKGALTTVACEQGGFFRTTPDKPQPDLQLRFLPERSMSPDGMNSLQKMGGGGAPPKSGFTFQCLACRPQARGRVRLRDANPLSKPLVEGLYLSQGGADIATLREGIKLGRRLSQTKAFEAVRGKELYPGADVVSDEALDSYVRNTIHSANALVGSCRMGAAADPLAVLDAQLRVRGVRALRVVDASAMPRIPGGQTAAPTIMIAEKAA
>c95
EEWDYIILGAGAAGCTLANRLTEDPSIRVLVLEAGDDASNDLKVRIPAMLIKVLRSEMDWNFETEPDDNGTPHGVYLCRGKTLGGSTCANVQLYHRGTETDYKSWEQAGAVGWGPKDVLPYFRKSESYHGGADKYHGADGPMTVGQVPYFNPLSAIFFDAMGELGYRRTHDFNDWSAPQEGFGRYSVTQRNGERVSTASTYLKQARGRPNLVVRTGAHVSRLLLDGAADLAATGVSYLQSGNEKAAKLAAGGEVLLAAGAVQSPQILMLSGIGPRAHLEDHGIVRKEVDGVGQGLQDHPAVLVSFESKLVCSLTDHIRLWGTALPNPLTLLNWFVRGKGALTTVACE
>c96
EEWDYIILGAGAAGCVLANRLTADPSIRVLVLEAGDDSSNDLKVRIPAMLIKVLRSDMDWNFETEPEPALNDHGVYLCRGKTLGGSTCANVQLYHRGTEADYKSWEQAGAVGWGPSDVLPYFRKSESYHGGADKYHGGDGPMTVSQVPYFNPLSAIFFEAVGELGHRRNHDFNDWSAPQEGFGRYSVTQRNGERVSTANTYLKQAQGRPNLSVRTGAHVSRVLLEGATDLTTTGVSYMQRGNEKAAKLAAGGEVLLAAGAVQSPQILMLSGIGPRGHLEDHGIKVRKEVDGVGQGLQDHPAVLVSYESKRACSLTDHIRLWGTSLPNPLTLLNWFVRGKGALATVACEQGGFFRTAADKRQPDLQLRFVPERSMSPDGMNSLQKMGGGSVAKSGFTFQLLACRPQARGRVRLRDANPLSKPLVEGLYLSQGTADLATLREGIKLGRRVCQTKAFAAVRGAELYPGADVVSNEAIEQYVRTTIHSANALTGSCRMGAAADPLAVLDPQLRVRGVCALRVIDASAIPQIPGGQTCAPTVMIAEKAA
>c97
EEWDYIILGAGAAGCVLANRLTADPSVRVLVLEAGDDASSDLKVRIPAMLIKVLRSDMDWNFETEPDTALNDHPVYLCRGKTLGGSTCANVQLYHRGTETDYKSWEQAGAVGWGPSDVLPYFRKSESYHGGSDKYHGGDGPMTVSQVPYFNPLSAVFFEAVGELGHRHNHDFNDWSAPQEGFGRYSVTQRNGERISTANTYLKQAQGRPNLSVRTGAHVSRLLLEGANDLTTTGVSYMQRGNEKAAKLAAGGEVLLAAGAVQSPQILMLSGIGPRAHLEDHGIKVRKEVDGVGQGLQDHPAVLVSYESKRACSLTDHIRLWGTALPNPLTLLNWFVRGKGALATVACEQGGFFRTTPDKAQPDLQLRFVPERSMSPDGMNSLQKMGSGAIAKSGFTFQCLACRPQARGRVRLRDANPLSKPLVEGLYLSQGSSDLATLREGIKLGRRVCQTKAFEGVRGEELYPGADVVSDEAIESYVRTTIHSANALTGSCRMGTAADPLAVLDPQLRVRGVRALRVVDASAMPRIPGGQTCAPTIMIAEKAADVI
>c98
EEWDYIILGAGAAGCVLANRLTADPSVRVLVLEAGDDASSDLKVRIPAMLIKVLRSDMDWNFETEPDTALNDHPVYLCRGKTLGGSTCANVQLYHRGTETDYKSWEQAGAVGWGPSDVLPYFRKSESYHGGSDKYHGGDGPMTVSQVPYFNPLSAVFFEAVGELGHRHNHDFNDWSAPQEGFGRYSVTQRNGERISTANTYLKQAQGRPNLSVRTGAHVSRLLLEGANDLTTTGVSYMQRGNEKAAKLAAGGEVLLAAGAVQSPQILMLSGIGPRAHLEDHGIKVRKEVDGVGQGLQDHPAVLVSYESKRACSLTDHIRLWGTALPNPLTLLNWFVRGKGALATVACEQGGFFRTTPDKAQPDLQLRFVPERSMSPDGMNSLQKMGSGAIAKSGFTFQLLACRPQARGRVRLRDANPLSKPLVEGLYLSQGSSDLATLREGIKLGRRVSQTKAFEGVRGEELYPGADVVSDEAIESYVRNTIHSANALVGSCRMGAAADPLAVLDPQLRVRGVRALVLDPQLRVRGVRALRVVDASAMPRIVGGQTCAPTIMIAEKAA
>c99
EEWDYIILGAGAAGCVLANRLTDDPSVRVLVLEAGDDASSDLKVRIPAMLIKVLRSDMDWNFETEPDAAGTSHGVYLCRGKTLGGSTCANVQLYHRGTETDYKSWEQAGATGWGPNDVLPYFRKSECYHGGADKYHGAEGPMTVSEVPYFNPLSAIFFEAVGELGHRRNHDFNDWSAPQEGFGRYSVTQRNGERISTANTYLKQAQGRPNLDVRTGAHVSRLLLEGATDLTTTGVSYMQMGNEKSAKLAAGGEVLLAAGAVQSPQILMLSGIGPRAHLEDHGIKVRKEVDGVGQGLQDHPAVLVSFESKLACSLTDHIRLWGTALPNPLTLLNWFVRGKGALTTVACEQGGFFRTTPDKPQPDLQMRFLPERSMSPDGMNSLQKMGSGAIAKSGFTFQCLACRPQARGRVRLRDANPLSKPLVEGLYLSQGSSDLATLREGIKLGRRVCQTKAFEGVRGEELYPGADVVSDEAIESYVRNTIHSANALVGSCRMGAAADPLAVLDPQLRVRGVRALRVVDASAMPRIVGGQTCAPTIMIAEKAA
>c100
EEWDYIILGAGAAGCVLANRLTDDPSVRVLVLEAGDDASSDLKVRIPAMLIKVLRSDMDWNFETEPDAAGTSHGVYLCRGKTLGGSTCANVQLYHRGTETDYKSWEQAGAVGWGPSDVLPYFRKSESYHGGSDKYHGGDGPMTVSQVPYFNPLSAVFFEAVGELGHRHNHDFNDWSAPQEGFGRYSVTQRNGERISTANTYLKQAQGRPNLSVRTGAHVSRLLLEGANDLTTTGVSYMQRGNEKAAKLAAGGEVLLAAGAVQSPQILMLSGIGPRAHLEDHGIKVRKEVDGVGQGLQDHPAVLVSFESKLACSLTDHIRLWGTALPNPLTLLNWFVRGKGALTTVACEQGGFFRTTPDKPQPDLQMRFLPERSMSPDGMNSLQKMGSGAIAKSGFTFQCLACRPQARGRVRLRDANPLSKPLVEGLYLSQGSSDLATLREGIKLGRRVCQTKAFEGVRGEELYPGADVVSDEAIESYVRNTIHSANALVGSCRMGAAADPLAVLDPQLRVRGVRALRVVDASAMPRIVGGQTCAPTIMIAEKAADEILNGR
>c101
EEWDYIILGAGAAGCVLANRLTEDPSVRVLVLEAGEDASSDLKVRIPAMLIKVLRSDMDWNFETEPDAAGTSHGVYLCRGKTLGGSTCANVQLYHRGTETDYKSWEQAGAAGWGPNDVLPYFRKSECYFGGADKYHGADGPMTVSQVPYFNPLSAIFFEAVGELGHRRNHDFNDWSAPQEGFGRYSVTQRNGERISTANTYLKQARGRPNLDVRTGAHVSRLLLEGATDLATTGVSYMQSGNEKAAKLAAGGEVLLAAGAVQSPQILMLSGIGPRAHLEDHGIKVRKEVDGVGQGLQDHPAVLVSFESKLACSLTDHIRLWGTALPNPLTLLNWFVRGKGALTTVACEQGGFFRTTPDKPQSDLQMRFLPERSMSPDGMNSLQKMGSGAIAKSGFTFQCLACRPQARRVRLRDANPLSKPLVEGLYLSQGSSDLATLREGIKLGRRVSQTKAFEGVRGEELYPGADVVSDEAIENYVRNTIHSANALVGSCRMGAAADPLAVLDPQLRVRGVRALRVVDASAMPRIVGGQTCAPTIMIAEKAA
>c102
EFARSFGDSAYHPSCTCRMGKNPEGRKAGSDDKIHSGYLGNGRIEAAVTQSNCKVWGIDNLRIVDASIMPSIVSGNLNAPVIMMAEKAADMIISSRDKISVVLPADLNASYWKPKYPDKQRDGIPFTSCQ
>c103
EFDFIVVGAGSAGSTIAGRLTESRHRVLLIEAGPPSSFLQDFPSLTPSFIAASPYLWKYETEPQLNTFQTMIGNRSRNYHGKTLGGSSKLNFMKYVRGKTKDYDEWESLGNPGWSFQYVLPYFKKSEHFHNPQEIENPGIDVEYHEDAGRLHVMPATKDMAQLSQVFLEAFQEMGFKFGDYNGAMQDEEVAYRSQVTQKIGLRADAYTSYIKDPGFDKDGTDLTVLTHSLVTKILFNKNKETEDLKANGVEVQRFSEKLRFKCKKEIILCAGSIGSPKLLMLSGIGPKQQLDEVGIKCIKELPGVGENLQDHVATMLVVKGENSPPNLEFDLLQNNPFELLRYYLTGNGAAGSIGTDVGLFFKTDNNQDTFDRPNIQMHSIPASFASLYGLGMTDIWGFSYESYKRYHKRFENMVSGLLIPTLLKPKSRGYVRLRSSNPSDLPIIQPNYFEDPDDVKTMISALKFTLNMSSTDVFKENNLDFGVDDSFCGNHSPGSVDYLQCMIKHWSCHYWHFVGTCKMGPKSDPSSVVDSRLNVHGANGLRVVDASIMPLIVSGNTNAATIMIAERAATFI
>c104
EFDKIIVGAGSAGCVLANRLTEDSNSKVLLLEAGPKDTILGTKFLQWKIHMPAALTYNLCDDKYNWYYHTLPQKHVNNRVMYWPRGRVWGGSSSLNAMVYIRGHAEDYNRWEKQGAAGWSYEDCLPYFRKAQTHSKGGDEYRGHDGPLNVTRFDGEGALDQAWLRAGQQAGYPFTEDMNGYQQEGVGKMDSTVHNGMRWSAASGYLRPVLSRSNLTTVNNILVTRVLFEGKKAVGIEVVEKGVTKRYRGQEIILSGGAINSPQLLMLSGVGPADHLREVGVDVVHDLAGVGQNLQDHLEVYMVQKCKQPITLYSDQKGLRMIRVGVQWFLNRTGSAATTHLETGGFIRSDPGVPHPDIQFHFMPSQVIDHGRVAPTLEAYQVHVGPMRATSSGWIKLQSKDPRQHPLLQPNYLDTEQDWHEMRQCVKLTREIFAQPAFDEYRGEELAPGDDVQTDEQIDDFIRRKSDSAYHPSCTCKMGDTGDNMTVVDRDCRVVGLDNLRIVDASIMPSIVSGNLNAPTIMMAEKAADIIKG
>c105
EFDYVILGAGAAGCVLANRLSADPTKRVLLLEAGNDGSQDIRVRMPAAAVKLFKSELDWDFSTSPDEALPGNEVYLCRGKTLGGSSCTNVMLYHRGSAADYKSWEDAGAAGWGADDVLPYYRAAFDYDEGASEFHGEGGPISVEEVRYQNPLSRAFLAAAGRLGFRRSFDFNDWSTPQDGFGRFKVTQKKGERVSTASAYLSPIAESRENLLVATGAFVTKLGVEGGTSSPSVASVHFLTGEHKDQPQTVRIAEGGEALLCAGAVQSPQILMLSGIGPREHLEEVGIPLVMDAPAVGEGLQDHAAVLVSHACTKRVSLTDKIRLPRSTKPNPLALLQWLLRKRGPLTSVACDHGGFVNTDPAAHPQPDLQLRFIAARAISPSGMSTLVKMGAGAALPSGFTTQLLTARPHSSGRVRLSSADPLAKPRIEGLYLSEGKEGDDDLKTLREGIKLSRRLHAESAFDEYRGEELYPGPEMQTDAQLD
>c106
EFDYVVVGAGSAGCVLANRLTEDGKYSVLLLEHGGSDRADPRDLFLHMPTALAIPMNMEKYNWGFESEPEPGLDGRRLHCPRGKVLGGSSSINGMVFVRGHALDFDHWRDAHGAQGWGYEDCLPYFKKMETWHSVPSNDADEAFRGSMGPLSVRNGEWRSPLYKAFVQAGHEAGYGLTDDYNAHRQEGFGKMAMTVTTRGLRASTATTYLQPAKTRANLSIWTNALVQRVLFDTNSATPTAQGIVFSDKTGARKKATARREVILAAGAIGSPHLLQLSGVGPGHVLSRIGVAAVVDRPGVGRNLQDHLELLLQYACTQPVSLYPSISMLGKFGIGLRWLLWRDGLGATNHMEATGFIRSAPGIPYPDIQYHFVPLAISYDGNASYHGHGFQVHAGPNRSKSRGYLEAQSEDAAVAPKLIFNYLSDADDLAEWRRVVKLTQEIVLQPAFDAFRGVPVNQAARAQTEQEIDAAVRAGVESAYHPCGTCKMGSGRDPMDVVDAELRVCGVQRLRVVDASIMPRITNGNLNAPTIMIAEKAA
>c107
EFDYVVVGAGSAGCVLANRLTEDGKYSVLLLEHGGSDRADPRDLFLHMPTALAIPMNMEKYNWGFESEPEPGLDGRRLHCPRGKVLGGSSSINGMVFVRGHALDFDHWRDAHGAQGWGYEDCLPYFKKMETWHSVPSNDADEAFRGSMGPLSVRNGEWRSPLYKAFVQAGHEAGYGLTDDYNAHRQEGFGKMAMTVTTRGLRASTATTYLQPAKTRANLSIWTNALVQRVLFDTNSATPTAQGVVFSDKTGARKKATARREVILAAGAIGSPHLLQLSGVGPGHVLSRIGVAAVVDRPGVGRNLQDHLELLLQYACTQPVSLYPSISMLGKFGIGLRWLLWRDGLGATNHMEATGFIRSAPGIPYPDIQYHFVPLAISYDGNASYHGHGFQVHAGPNRSKSRGYLEAQSEDAAVAPKLIFNYLSDADDLAEWRRVVKLTQEIVLQPAFDAFRGAPVNQAARAQTEQEIDAAVRADVESAYHPCGTCKMGSGRDPMDVVDAELRVCGVQRLRVVDASIMPRITNGNLNAPTIMIAEKAA
>c108
EFDYVVVGAGSAGCVLANRLTEDGKYSVLLLEHGGSDRADPRDLFLHMPTALAIPMNMEKYNWGFESEPEPGLDGRRLHCPRGKVLGGSSSINGMVFVRGHALDFDHWRDAHGAQGWGYEDCLPYFKKMETWHSVPSNDADEAFRGSMGPLSVRNGEWRSPLYKAFVQAGHEAGYGLTDDYNAHRQEGFGKMAMTVTTRGLRASTATTYLQPAKTRANLSIWTNALVQRVLFDTNSATPTAQGVVFSDKTGARKKATARREVILAAGAIGSPHLLQLSGVGPGHVLSRIGVAAVVDRPGVGRNLQDHLELLLQYACTQPVSLYPSISMLGKFGIGLRWLLWRDGLGATNHMEATGFIRSAPGIPYPDIQYHFVPLAISYDGNASYHGHGFQVHAGPNRSKSRGYLEAQSEDAAVAPKLIFNYLSDADDLAEWRRVVKLTQEIVLQPAFDAFRGVPVNQAARAQTEQEIDAAVRADVESAYHPCGTCKMGSGRDPMDVVDAELRVCGVQRLRVVDASIMPRITNGNLNAPTIMIAEKAA
>c109
EFDYVVVGAGSAGCVLANRLTEDGKYSVLLLEHGGSDRADPRDLFLHMPTALAIPMNMEKYNWGFESEPEPGLDGRRLHCPRGKVLGGSSSINGMVFVRGHALDFDHWRDAHGAQGWGYEDCLPYFKKMETWHSVPSNDADEAFRGSMGPLSVRNGEWRSPLYKAFVQAGHEAGYGLTDDYNAHRQEGFGKMAMTVTTRGLRASTATTYLQPAKTRANLSIWTNALVQRVLFDTNSATPTAQGVVFSDKTGARKKATARREVILAAGAIGSPHLLQLSGVGPGHVLSRIGVAAVVDRPGVGRNLQDHLELLLQYACTQPVSLYPSISMLGKFGIGLRWLLWRDGLGATNHMEATGFIRSAPGIPYPDIQYHFVPLAISYDGNASYHGHGFQVHAGPNRSKSRGYLEAQSEDAAVAPKLIFNYLSDADDLAEWRRVVKLTQEIVLQPAFDAFRGVPVNQAARAQTEQEIDAAVRAGVESAYHPCGTCKMGSGRDPMDVVDAELRVCGVQRLRVVDASIMPRITNGNLNAPTIMIAEKAA
>c110
EFDYVVVGAGSAGCVLANRLTEDGKYSVLLLEHGGSDRADPRDLFLHMPTALAIPMNMEKYNWGFESEPEPGLDGRRLHCPRGKVLGGSSSINGMVFVRGHALDFDHWRDAHGAQGWGYEDCLPYFKKMETWHSVPSNDADEAFRGSMGPLSVRNGEWRSPLYKAFVQAGHEAGYGLTDDYNAHRQEGFGKMAMTVTTRGLRASTATTYLQPAKTRANLSIWTNALVQRVLFDTNSATPTAQGVVFSDKTGARKKATARREVILAAGAIGSPHLLQLSGVGPGHVLSRIGVVPVVDRPGVGRNLQDHLELLLQYACTQPVSLYPSISMLGKFGIGLRWLLWRDGLGATNHMEATGFIRSAPGIPYPDIQYHFVPLAISYDGNASYHGHGFQVHAGPNRSKSRGYLEAQSEDAAVAPKLIFNYLSDADDLAEWRRVVKLTQEIVLQPAFDAFRGVPVNQAARAQTEQEIDAAVRADVESAYHPCGTCKMGSGRDPMDVVDAELRVCGVQRLRVVDASIMPRITNGNLNAPTIMIAEKAA
>c111
EFDYVVVGAGSAGCVLANRLTEDGKYSVLLVEHGGSDRAVPWDVFLHMPTALAIPMNMQKYNWGFESEPEPGLDGRRLHCPRGKVLGGSSSINGMVFVRGHALDFDHWRDAHGAQGWGYEDCLPYFKKMETWHSVPSNDTDEAFRGSMGPLSVRNGEWRSPLYNAFVQAGHEAGYGLTDDYNAHRQEGFGKMAMTVTTRGLRASTATTYLQPAKTRANLSIWTHALVQRVLFDTNSATPTAQGIVFSDKTGARKKATARREVILAAGAIGSPHLLQLSGVGPGHVLSRIGVPAVVDRPGVGRNLQDHLELLLQYACTQPVSLYPSISMLGKLGIGLRWLVLRDGLGATNHMEATGFIRSAPGIPYPDIQYHFVPLAISYDGNASYDGHGFQVHAGPNRSKSRGYLEAQSKDAAVAPKLIFNYLSDADDLAEWRRVVKLTQEIVLQPAFDAFRGVPVNQAARAQTEQEIDAAVRAGVESAYHPCGTCKMGSGRHPMDVVDPDLRVCGAQRLRVVDASIMPRITNGNLNAPTIMIAEKAA
>c112
EFEGKSITDQIYNLRGNIRKRALLSWIMFGKGPLTSTGCDRGAMVRTSAAQGHLPDLQMRFVPGMALEPDGVSTYTRFGNFKKEGRKWPSGVTFQVLAARAAGKGQVSLKSDDPFDSPLIESGYLTDRDGRDMATLKNGIELARKIASTGTMSSVLDGEIFPGADVLAPAAVEEYIRRTIHSSNALVGTCRMGTAAENGDVVDKDLKIFGLEGIRVVDASVIPIIPGGQTGAPTVMIAERAADMI
>c113
EFGNEEWTFEKVLPYFKKFENDLDFSDDYHGQDGYIKVKRVPENEWDDIHRAFYNSCIDYGFPSCPDHNKPDSTGVGPLAFNQIDGVRQSTSLTYLADVRHRPNLNIKSNTYVSKILFDGMKAIGLELKSKSEQFEIYAEQIILCAGAIESPKILLNSGVGDPDKFINHGIKPVIDLPGVGKNLRDHPMAYIAWEPKSDYQNPTTNYSRVAMSLRYTSKDSNFKNDMIVYMNSSTKNNGNPEVPNGIKANLTLNLEESSGEIFLNDQDPTDYPRLFYNYLDTENDVNRFIEGINILEEIGNHNEFQKYVGDMIHPNIDIRKDDKLLKKWLHGKMVTGHHSSGTCKMGNDPLAVVDQTGSVIGAENLKVVDASIMPDCIRANTNATVMLIAERIIDLWE
>c114
EIIVSAGAIGTPQILMLSGIGPKDHLNALGVPVLVDSQVGQNLQDHIVVPYGPFLHNDTEATAWWDYLKYGKGQYTSNGIDGMAFTATNYSQHADWPDIQLHFAGYSFATDGGVKDNIGMSDEAWDQIYRPLTEKNTASILVTLIRPKSRGQIRLKSTDPEDHPLIDPRYYSHPNDIQVMMEGLKFAREVIRTSAMQQHQMRLSDLEHPACGQFELDSDPYLECLIQQDSVTLYHPVGTCKMGPRNDSQAVVDHQLRVHGVKGLRVADASVMPQIISGNTNAPTIMIGEKLAQMLVQK
>c115
EILITSGAIASPQLLMVSGIGPADHLKENGIKVVADLPGVGENLQDHPSAVVSFKTPKKGISVTSKLRIPGTTITNPLHAFRWLFFGTGILTSVGCDHGAFTKTSAADGQSDLQVRFLPAKALSPDGMTTFSLFRTTPNLEDGYSFQSVAVRARSRGQVRLASSNTHVKPSINAGYLADAADMTTLREGIKLGRKLGNRDEWGNLKGEEVYPGTEVQTDDEIDEYIRNTVHTANAIVGTCKMGNDAASVVGPDLKVHGVDGVRVIDSSIIPRIMGGQTGTPVVMIAERAAKNIRKAHAAEEKVSGEEYDYIIAGGGLAGTVLAERLTADGTKNVLMLEAGSADYKNKFINIPAGILRLFKSSFDWDYETKGEKACNGRNVYFARGKVLGGSSCLNVLLHHRGTNKDYDDWGVPGWGSADVLEYFKMSHDDLTNRDPAYHGKGGEWTMDEVKYQNPLSKKFLVVGADAGLGTNDDFNNWGREQDGVGSFQVSAKKGARVSGASAFISKAIKRKNLSVSTGTMVHRINFDAFM
>c116
EKFDFVIVGGGTSGLVVATRLTEDPNVKVLVLEAGANKLNDPRIVIPGLAPSLYDDPDFDWCFMSVPQLKGRQIAQPKGRTLGGSTAINLGMVIYPSKSGFDAWEKLGNSGWNWDSISPYLRKFHTLTLPSESAQEDLGLKYIDQNLQGTNGPIHLSFGESDAYTPFNKAWPKTFSALKQELTGDPITGTANGAFTNPGIVNPVTKARSHAGADYLNAEVSIRPNLRILTEVLVSKILIKKMTTGDCLATGVRITTKAGIEKSIDARLEVIIAAGTIKSPQLLELSGVGDSKLLESHGIEVLVDNPNVGENLQDHGYVPFSWEVADDQVSGDVLRDPDVAGAAMTAYTTAKAGPLSGVPIVSSFMPLVDFAEKDMDKLLDTHVESVQYPHFPSQRKQFQILRDILKSPQDASGQFTMAPFQIVPRNGPHCKGIYGMGKQGNYMSIVSVLNHPFSRGVVHINSPDPKIQPTLDPRYFSHPLDLELHGRHTQWLETIAATEPMASLLKKDGHRIHAEKPVLDLEDAKRVVEETFISHYHVTSTCSMLSKELGGVVNERLLVYGVSNLRIVDASIFPLIPRG
>c117
EKFDFVIVGGGTSGLVVATRLTEDPNVKVLVLEAGANKLNDPRIVIPGLAPSLYDDPDFDWCFMSVPQLKGRQIAQPKGRTLGGSTAINLGMVIYPSKSGFDAWEKLGNSGWNWDSISPYLRKFHTLTLPSESAQEDLGLKYIDQNLQGTNGPIHLSFGESDAYTPFNKAWPKTFSALKQELTGDPITGTANGAFTNPGIVNPVTKARSHAGADYLNAEVSIRPNLRILTEVLVSKILIKKMTTGDCLATGVRITTKAGIEKSIDARLEVIIAAGTIKSPQLLELSGVGDSKLLESHGIEVLVDNPNVGENLQDHGYVPFSWEVADDQVSGDVLRDPDVAGAAMTAYTTAKAGPLSGVPIVSSFMPLVDFAEKDMDKLLDTHVESVQYPHFPSQRKQFQILRDILKSPQDASGQFTMAPFQIVPRNGPHCKGIYGMGKQGNYMSIVSVLNHPFSRGVVHINSPDPKIQPTLDPRYFSHPLDLELHGRHTQWLETIAATEPMASLLKKDGRRIHAEKPVLDLEDAKRVVEETFISHYHVTSTCSMLSKELGGVVNERLLVYGVSNLRIVDASIFPLIPRG
>c118
EKFDYVILGAGSAGCVLASRLTEDADVRVCLLEAGPSDTGSWDSWKIRMPSALTFNLNGTKYNWDFWTTPQKHLDGRRIHQPRGKMLGGSSGLNAMAYIRGHALDYERWGNEGATGWSYASCLPYFKKAQRHMDGESEYCGGRGPLGVTTGWYENELNDAFVKSGVEAGYAHTPDLNGFRQEGVGPMHMTVREDGVRASTSNCYLHPPIKRSNLEVRPGCAVTRVILEDGPGGDGGDQRCVGVEYVDENGATQELRAEREVIISLGAFGTPQCLMHSGIGDAAQLEQHGLGVKVHNEGVGANLQDHIDTYIQVRTTPWKPISAGLEWFASGTGLCASNHFEVGGFVRTRAGMRVSKKPSILSMKPSILSMKPTIISMKPSILSMKPSISGLCSAEIGLLYAQHPDLQFHFVPACVVGQAEILTKHGYQTHCSTMRPLSRGGVTLSSADPHAAPLIDPNYFSHPQDVEDIRNGVRLTLEIAEQQSLQALTSHRFSPGPELDPGDDEQVDAFVRENCHSAYHPCCTAAMGSVVDESGKVYGVRGLRVVDASVMPSMVSGNLNAPTIMLAERIA
>c119
EKGIEVSEQILGQAGAESKSIFVSKVRGAHLGGTAALGRIVNKDFETEISGLYVCDASILPYAPGNPPVLTIVALAKKLSSKLAGA
>c120
EKLYMPTWRLPVLSPEDDIDACIDAAGIRAVDFDAAAFHPLGTCGFGVDPETFPLDCDLKVRGWDDLYVADGSVFPTSLAVNPQLSIMAMATRCAFHLDETLA
>c121
EKRERVSSETAYLSDDVLARPNLKVVIHASVTKILFEKHGDETHAVGVEFARNSTSIVYRARARKEVVLWQVYCPAEELNKHGITVIHDLPGVGANLIDHPVVDFYFKDKSKMSPKYFLPQGPWEIVLVLYYTLVYMFTGKGPLGTNWGEAAAFCRSDDPVVLPADEFPRRKPIKDSTWAWNLHAFSIHVTVE
>c122
EKVFKTKGVVFSGGVMGSVKLLFECKRKGFLPNLSDRLGDYIRTNSEAILGVKANDRHADYSDQIAITSGIYPDKKTHVEVVRFNKGSDAMSGLTTPLTDGGGRVPRFIRFIGNISRHPWSFLKTLWPLGWGARTSILLVMQTEENYLRFDYRPRWWRLGRWSMNSKLAPGAKKIPSYIPIANRIARRMGEKIDGKPVSAWPEVLFDVPTTAHILGGAVMGRNREEGVLNFRGEVHGYPNLYVVDGSNIPVNLGVNPSLTITALAEYIMSQLPEKREEGHEKRSEMDRSHVPDTILRTRRPYHV
>c123
ELAMLGAKREGYESHWIKRYVEGCEGTGQCLQGCKKLRKQSTNLNYVPEVLERGGHVVSAAPVERVKFEGRRAVAVEGRFSHPRERRPGGRFTVRARKAVVIAASATHSPVLLMRSGVKSRALGQEFRAHPGTGVFGVYDEPVDMNIGATQGWASTAFREEPGLKLETLSIPMEMVASRLSGGGVALMERLRDYRHICMWVQACRAESKGTVKRGFGGRPSIKYGLDRADMLRFREGMYLVAKTHVAAGAKKLIPGIHGMPYELSPNQVDLLKEAPLDPRAYIAILSHLFGGCVMGTDPATSVVDGSGRVHGYEGLVVADASVIPTNLGVNPQHTIMGLAMTFADDLLAA
>c124
ELGFSQPNSDYNSDESLGSSYLQMNIQGYRVSTFLGFMSALFAPSNKDRSKIQLDILPQAQVVKLLFDDSKQYIKGIEFVDLQTNSRHTVLIKDVTTGEVIVCAGTVASPQLLLLSGLFTPPSPLFYKVNLHQTILNHSSIACWNRKGIGDSQELQSLNIPVVHHVPGVGKNLQDHMILGLRYKLKDPSITKHKVLNTNNVNTWDNFVNYIWKGHGFFNTSGLLFVHIHLFFFFFFSSFPFSPLSPPPL
>c125
ENGIKYNNDFNDWDHDQEGFGRFKVSQKNGRRWTAASSYLKEAQNNDNGLKVRSSVTVNKIILDKNKQATAVEIKDSFGKTRNIKCKPNGEVLVCGGAINSPKLLQLSGIGPKDVLSKAKVECKVNLPGVGKNLQDHPAVVITRNVKSGKSSTDEVMWRPKGMKPQPRIKAITQWLINGVGPLTSPGCDHGAYYRTDKRLQSPDIQFRFVPARGSDPDGVLSYIKIAREGAPISGLTLQVLAIRPKSVGSVKIRSNNPEEKPDVDLGFLSNSADVAAMVKGVKKGREILASAVFKDVIEGDEIWPGQDIQTNAEIEQYIRTNIHTANAIVGTCKIGRSSDKNAVVDNELRVHGTSNLRVIDSSVMPKIPGGQTASSTIMIAERGAEII
>c126
EPYDYIIAGGGLAGCVLAERLTSDKSKRVLLLEAGRPDYNNLFIRLPAGILKLFRSVYDWQHETSGETECKGRNVFLQRGKVLGGSSCTNVLLHHRGSAQDYNDWKVPGWSASDVLPFFKKSENDNTGRSSDYHAKGGEWSMDEVRYQNPLSKRFLEVGEAFGLGKNDDFNNWSRPQDGVGRFQVTELKGERCSGATAFLSKALKRRNFAIRSRVMARRITFDDGKIATGVDFDLMXXXXXXXXXXTMKTFSARLKPGGEVICACGAIASPQLLMCSGIGPASHLEEYGIPVVSDIPAVGKNLQDHPAAVVSFNTPRKGVSVTSKLRFMGKTNPLPVLKWFFFRTGIMTSTGCDHGAFVKTPAADSQPDLQIRFLPARAITPDGMTSFTKFRNLKKLDDGYSFQSVAARARSCGEVRLASSNTHTKPIIHGNYLSDSKDLDTLREGIKLSRKLGKREEWKEFLGKEVFPGNHVQNDEQIDEYIRDTLHTANALTGTCKMGTGSDAVVGPDLRVKGVKGLRVIDASVIPIIPGGQTATPTVMIAERASTFI
>c127
EQGWSVIVVEEGPWARTRDFQLDIGQAFRTLYRWGGTGFVTGRTFLPLLQGVCVGGSTTINSAIVWRLPQDVYDDWARNYGIGPAINADLVEPSFDRLERALNVHPVAEDVLGRNSTIMRDGMRKLRIEPHTIERNERGCRGSARCAQGCPNGAKLSTAMTCIPWTLERGGRIYTNTRAVRVRSTRGNATGVEAVTTAGGKLSLMARRGVILAASTVQTPNLLRRSGVRSRALGRHFMAHPGVGLAARYEDDVCLHKGATQGMETIHFRRTDRFKLESLALSPELTAVRIPGFGKDLVRRLADFRRIALWGVQVRARAVGKVDSLAGSDRVRYTLLPEDVRAGKKGLRTLAEIAFATGAKEVWPGIHGLPEALRSADDLHLIDDVPDDPRYFMFIATHLFGAARMGPDPRTSVVGLDFATHEIRKLFVVDSSLFPTNLGVNPQHAIMGIAMAAAQRIASA
>c128
ERLHWHGDRVTGMTARGRNRDGRSVRLTVKSRAVVAAMGTFFTPLFLRDQGIRNRHLGRHLTLHPAGVVNAIFPDRDFANSRSIPQGFGVTDWGKQGLMFEGGSVPLAGHSLLNNLYGEDWVRFTEDYQQTAYFGFMIRDTSQGRVRRGPHRDWPLIRYRMNDRDFAQFLRGVDTLARIYFAAGAREVLVPGLDGLQRLHSVAELERFLAGPLKPRDFLITAYHPLGTARLGRDPDDGVCDAQHRVHGRQGLYVMDGSAVPSSLGANPQVTIMALAGRAAARLADHLQEHQA
>c129
ESKNIDLIIKTSITAAKIKDSEIKELTLTNTSGDKERIKSKYYVFAMGGIENGRMLKFIAVDNPNSTLSKNQNVGAYWMEHPHGTVGDYFYNIPKNNRQHIGISEQMKRELKILSCNLNFTSQLKHPTDGKVKKLLRDLICVDETIGSEISYGLGRNYCGGEIDAAWEQEPSIDNRIDLDTEVDAFGIPKVVLKWQKSDFDFRTIRLTSEYIAESMAKNNFAKIRLREWLWTGKPPENDGIGGGHHLGGTRMSHSRDDGVVDANLKCWDVSNLYMAGSSVFPSGGHANPTLTIVQLAVRLAEHLVSKP
>c130
ESPRLWLNSGLPNSNDAVGRYFNNHLQDIVTGFFDRDVHPNVGQVTMARADFPGYGAVFVQGNGPQNVSIALAGAGKGFWDDSTDGEPWDTAGRFYGEEAVRRIREYHRTLSVLVCTDDEEHRDNRIVLGDDWPADEHGAVPKVVYHPTPKSKERQLWLARKAAEILRAAGAREVHRTNFDPVLVTHLMSTMRVGRDAATSVASPSGEAHEVAGLYIGDCSAMPNGLGGPNPTLTGQAMAARTADQIFAALA
>c131
ETYDKIVVGAGSAGCVLANRLTEDANTKLLLVEAGPKDTILGSKLLQWKIHMPAALTYNLCDDKYNWYYTTLPQKHCNDRVMYWPRGRVWGGSSSLNAMVYVRGNALDYDRWESEGAEGWSYENCLPYFQKAQTHEYGGNDYRGGSGPLHVSRGTSHNPLHDVWVKAGQEAGYLYTDDMNGYQQEGVGYMDATIHQGKRWSAASAYLHPILNRPNLSTKTQVLVTRVLFEGKKAVGIELVENGVTKKIRAGEIILSGGAINSPQLLMLSGVGNASDLKQAGVDVVHDLPGVGANLQDHLELYVVQCCKKPVTLYSDQKGMKMIKVGLQWFLNQTGSGATAHLESGGFMRSQAGVSHADIQVHFVPTQVIDHGRKPPYLEAFQVHVGPQRQTSRGWLKLASNDPRAPPLIQPNYLETEKDRWDMRQCVRLMREIFAQPAFDEYRGPELSPGDDVQTDEQLDNFVREHGDSAYHPSCSCRMGADDMAVVDNQTKVIGLDNIRVIDASIMPSVITGNLNAPTIMMAEKAADMVRGR
>c132
EVILSAGVFNTPQILKLSGVGPKTELEEFNISVVVDLPGVGTNLQDHYEISTVSKFETDFELLEGCTFLSTGPTDPCYVRYTTNATEKGPYATNLLPSAVLLKSSVAESDRDMFIFGGPVMFRGYFQGYTNAAIADTKHWSWVTLQAHQNNHAGTVTLNSANPLDVPSINFNFFDAGTTADGADAHDLAPMVEGINWSRKVSDSVSGKYSFTEEQPGADITTTEQIQDFVKNQAWGHHASCSAPIGADDDGLAVLDSHFRVRGVEGLRVVDASVFPKIPGFFPVAAIFMISEKAA
>c133
EWDYIIVGGGAAGCVLADRLSADGARKVLVLEAGQDPSKDMRVRVPAALVKVFKSELDWNFQTAAVPGTERGVYLCRGKALGGSSSTNVMLYHRGTPADYQAWEEKGATGWGPAEVLPYFRKAEDHADGPSEYHGVDGPMPVQDVPYVNPLSRAFLAAAGQLGFRRQHDFNDWSAPQEGFGRFKVTQNNGERCSAWNAYGSGAAAARANLVVKAGCHVTKIALDKAVVATGVEYTAAGEQCTAKLAKGGEVLLCAGAVQSPHVLMLSGLGPKAHLEQFGVPVRKDLPGVGVGLQDHPAALVSYGSSQPVSITDEIRLFGSKYPNPLTTLKWLLFRRGALTTVACEFGGFFRSPRAKAADQTDLQVRFIAAKAMNPDGISTLEKFGAGARTTPGFTAQVVAIRPKSEGRVRLQSADPFDKPVLENVHLSSEEDVHTLREGIKLGRRLLQDSSFDEYRTEEVYPGAKVQSDADLDAFIRGSVHSANALTSSCRMGSEKDPNAVLDAELRVRGVGALRVIDASAFPQIPGGQTCAPTIMVAEKAADLL
>c134
EWDYIIVGGGAAGCVLADRLSADGARKVLVLEAGQDPSKDMRVRVPAALVKVFKSELDWNFQTASVPGTERGVYLCRGKALGGSSSTNVMLYHRGTPADYQAWEEKGATGWGPAEVLPYFRKAEDHADGPSEYHGVDGPMPVQDVPYVNPLSKAFLEAAGQLGFRRQHDFNDWSAPQEGFGRFKVTQNNGERCSAWNAYGSGASGAAAARANLVVKAGCHVTKIALDKAVVATGVEYTASGEQCTAKLAKGGEVLLCAGAVQSPHVLMLSGLGPKAHLEQFGVPVRKDLPGVGVGLQDHPAALVSYGSSQPVSITDEIRLFGSKYPNPLTTLKWLLFRRGALTTVACEFGGFFRSPRAKSADQTDIQVRFIAAKAMNPDGISTLEKFGAGARTTPGFTAQVVAIRPKSEGRVRLQSADPFDKPVLENVHLSSEEDVRTLREGIKLGRRLLQDSSFDEYRTEEVYPGAKVQSDADIDAFIRGSVHSANALTSSCRMGSEKDPNAVLDAELRVRGVGALRVIDASAFPQIPGGQTCAPTIMVAEKAADLLLG
>c135
EYDFIIIGAGSGGATIANRLTEIEGWNVLVIEAGGDETIFSDIPVTVQFLQRTEIDWKFSTVPQSGACLGMTDHVCHWPRGKVLGGSSVLNYMMYVRGNKLDYDGWAAAGNDGWSYDEVLPYFIKSEDNRNPYLMNSPYHGRDGYLTVSEPPYVTPLVTTFVEGGMEMGYENRDCNGEIQTGFMIAQATTRNGARCSTAKAFLRPVRNRGNLNVAMHAMVTEIIIDPVTKQATGVKFTRDGVVFRVTATKEVILSAGSVGSPQLLMVSGVGPAEHLTSLNIPVIANLSVGDNLQDHIALGGMVFQIDKPYSMVADRFYNIPSVIDYYFNKEGPLSASGGCEGLAWVKTKYADQSIDWPDIEFHFVSGSPISDGGVNIRHNNNIEDSVWQDYYLPIANTDTWQVIPMLLRPESIGTIRLASSDINTKPLIDPKYFSKEIDLKVLIEGTKIGLALSQTKAFQALGSRFYSKPFPGCEAFTPWTDDYWGCFIRHYSQTIYHPIGTCKMGPSSDKTAVVDPRLRVHGIRGLRVVDASIMPKHVSGNTNAPTIMIAEKAADMI
>c136
EYDFIIVGAGSAGAVLANRLTEIGDWNVLLLEAGGDETILTDAPLAVGNLQRSSKDWQYKTVPQTANGACLAFVNNQCLWPAGKVLGGSSTINYMLYNRGNRLDYDRWADLGNTGWSYDDVLPYFLKSEDNRNAYLAATPYHSTGGYLTVMDSPYLTPLVTAFVEGGVEMGYEHRDNNGEKQQGFMFAQVTTRNGSRCSTAKAFLRPVRDRRNLHVAMRAQVTQVVVDATEKRATGVRFVRNGVHYHVDAKKEVIVSAGAVGTPKILMLSGIGPAEHLNSLSIPVVADLPVGDNLQDHISLGGMVFQIDKPYSIVSNETVNLPSILKYFTRGQGPVTSIGACDGLAFVSTKYAPVDKDWPDIEFHFISGSPVSDGTMGIRRSTNIREATWNAYYQPLLNTHSWQIWPTLMRPESIGTIRLASTDPMALPVIDPRYFTVQRDLDVLVEGVKIVMALSTTTAFQNMGTRFYAKPFPGCEAFDINTDAYWACFIRHYSQTLHHPSGTCKMGPDSDAAAVVDPRLRVRGVDHLRVVDASVMPMIISGNTNAPTIMIAEKAADMI
>c137
EYDFIIVGAGSAGAVLANRLTEIGDWNVLLLEAGGDETILTDAPLAVGNLQRSSKDWQYKTVPQTANGACLAFVNNQCLWPAGKVLGGSSTINYMLYNRGNRLDYDRWADLGNTGWSYDDVLPYFLKSEDNRNAYLAATPYHSTGGYLTVMDSPYLTPLVTAFVEGGVEMGYEHRDNNGEKQQGFMFAQVTTRNGSRCSTAKAFLRPVRDRRNLHVAMRAQVTQVVVDATEKRATGVRFVRNGVHYHVDAKKEVIVSAGAVGTPKILMLSGIGPAEHLNSLSIPVVADLPVGDNLQDHISLGGMVFQIDKPYSIVSNETVNLPSILKYFTRGQGPVTSIGACDGLAFVSTKYAPVDKDWPDIEFHFISGSPVSDGTMGIRRSTNIREATWNTYYQPLLNTHSWQIWPTLMRPESIGTIRLASTDPMALPVIDPRYFTVQRDLDVLVEGVKIVMALSTTTAFQNMGTRFYAKPFPGCEAFDINTDAYWACFIRHYSQTLHHPSGTCKMGPDSDAAAVVDPRLRVRGVDHLRVVDASVMPMIISGNTNAPTIMIAEKAADMI
>c138
EYDFIVIGAGSAGAVIANRLSEISDWSVLLLEAGPDETIMTDIPGLSKYLQKTNIDWQYQTEPQPGENCMAMQDGRCNWPRGKVLGGSSVLNYMLYVRGNRRDYDSWAANGNTGWSYEDVLPYFLKSEDNRNPYLARNKYHTTGGYLTVQEAPYKTPLAAAFIAAGEELGYKNRDCNGEFQTGFMFPQGTIRRGFRCSTAKAFLRPVRDRSNLHIAMHAHVHRVLINSRKRAYGVLLERRDKMYAIVARKEVILSAGAINSPQILMLSGIGPASHLESFGLPVYADLPVGYNLQDHISGRGMVYLVNSSVSYVETRFINLPSIFQYYRTDGGPLTALGTEGLAWVNTKYNDPNDDYPDLQLQFIAGSTVSDGGRTLRYNDGLKQSVWETYYEPISYADSWQPIPIVLRPRSKGRLLLKSTDPYDKPFIYSNYFQDEHDLKVMIEGMKIGLALSKTDAFQRFGSRFYDRPFPGCEHLALWTDDYWGCFLRHYSTTLYHQAGTCKMGNQSDPTAVVDPQLRVYHIQNLRVADASIMPNVVSGNTNAPTIMIGEKAADMI
>c139
EYDFIVIGAGSAGAVMANRLSEISDWKVLLLEAGGDESILSDIPIASYFLWNSEMDWQYLTVPQEANGACLAYKRCALPFGKVLGGTSVLNSMIYARGNRKDYDGWADMGNTGWSYENVLPYFIKSEDNRNAYLAETPYHGKGGYLTVTETPYRTPLASAFVEAGVEMGYSHRDINGEFATGFMFAQTTTREGSRCSTAKAFLRPVRNRNNLHVSLNSMVTKILFDDNKRAVGVKFVRYGIHYSVQAAKEVILSAGAVKSPQILMLSGVGPADHLSSLSIPLIADAPVGNNLQDHVGIPGLMFQIEKPYSMIGYNFIASTTLLNYFLHKRGPLTSTTTVEGLAWVNSKYADETQDFPDVQFHFASGAPITNAEADVAATVNMKNDVWSEYGGPIKNHTWQIVPMVLRPQSVGTVRLASADPFAKPLIDPAYLKVDQDVEILVEALKIALALSKTKSFQELGTSFYAKIFPGCENQTPWTDDYWRCFVRHYTQPGWHLVGTCKMGPSTDPTAVVGPRLLAHSVQGLRVVDGSIMPKIVSGNTNAPIIMIAEKAA
>c140
EYDFIVIGGGSAGAVMASRLSEVSDWKILLVEAGGDESISTDIPSVVHYIQKTKLDWQYQTVPQTGSCLAMNEQRSNWPRGKVLGGSSVLNYMLYVRGNRRDYDRWSDEGNTGWSYDEILPYFLKSEDNRNPYIATNTKYHSTGGYLTVQEPPYRTPLAAAFIQGGIELGYENIDINGEQQTGFMMAQSTTRDGSRCSTAKAFLRPVRNRQNLHISLHSHVLKINIDEESKTATSVKFEREGIHYIVSARKEIILSAGSINSAQILMLSGVGPAEHLQQHGIPVLSDLRVGDNLQDHITLGGMIFQIEYPYSYVDTRLVNFQAMYNYYNYHKGPWTTLGGCEGLAFIKTKYANQTDDWPDVQFHFVAGTPVSDRGTQIRHNHGIRNEVWNDYYKNLEWTDTWQVIPVLLRPKSVGTIRLASTDPYAMPLIDPKYFSDIQDMKVLIEGIKVALALSETDAFREIGTKFFDKPFPGCENFTLWTDNYWECFIRHYSATLYHPVGTCKMGTADDPTAVVDAQLRVYGIKQLRVVDGSILPKIPSGNTNAPIIMVAEKAA
>c141
EYDFIVVGAGSAGAVVANRLSETGKWSVLLLEAGGDETIFTDIPGSVYFSQQSKINWGYQTVPQTDSCLALKDQRSNWPRGKVLGGSSVLSYMLYSRGNRHDYDRWSEEGNTGWSFDEVLPYFMKSEDNRNPYIASNTRYHSTKGYLTVQEPPYQTPLSTAFIQAGVEMGYDHLDVNAAKQTGFMLTQSTTRDGARCSTAKAFLRPIRNRKNLHISMDSHVLKIIIDADTKTATGVKFEREGILYTVSAGKEVILSAGAVNSPQILMLSGVGPADHLKQHGISVLADLRVGDNLQDHVSIPGLVFQIDKSFSHIDTRFQNLPALYDYFRNSSGPLTSIGGYEAIAFVNSKYANQVDDYPDIQFHFIAKTPVSDGGTSIRINSGIRDDVWDRYYKPLKWFDTWQVIPILLRPKSVGTIRLAFNNPYASPLIDPKYFSEDQDIKVLIEGIKIALALAQTEAIQKLGTRFYDEPFPGCEQYTLWTDSYWECFSRQFTGTNYNPVGTCKMGPSNDPTAVVDPELRVYGIKQLRVVDGSIIPRIPSGDINAPIIMIAEKA
>c142
EYDFIVVGAGSAGAVVANRLSETGKWSVLLVEAGGDETIFTDIPGSVYFSQQSKINWGYQTVPQTDSCLALKDQRSNWPRGKVLGGSSVLSYMLYSRGNRHDYDRWSEEGNTGWSFDEVLPYFMKSEDNRNPYIASNTRYHSTKGYLTVQEPPYQTPLSTAFIQAGVEMGYDHLDVNAAKQTGFMLTQSTTRDGARCSTAKAFLRPIRNRKNLHISMDSHVLKIIIDADTKTATGVKFEREGILYTVSAGKEVILSAGAVNSPQILMLSGVGPADHLKQHGISVLADLRVGDNLQDHVSIPGLVFQIDKSFSHIDTRFQNLPALYDYFRNSSGPLTSIGGYEAIAFVNSKYANQVDDYPDIQFHFIAKTPVSDGGTSIRINSGIRDDVWDRYYKPLKWFDTWQVIPILLRPKSVGTIRLAFNNPYASPLIDPKYFSEDQDIKVLIEGIKIALALAQTEAIQKLGTRFYDEPFPGCEQYTLWTDSYWECFSRQFTGTNYNPVGTCKMGPSNDPTAVVDPELRVYGIKQLRVVDGSIIPRIPSGDINAPIIMIAEKA
>c143
EYDFIVVGAGSAGAVVANRLSETGKWSVLLVEAGGDETIFTDIPGSVYFSQQSKINWGYQTVPQTDSCLALKDQRSNWPRGKVLGGSSVLSYMLYSRGNRHDYDRWSEEGNTGWSFDEVLPYFMKSEDNRNPYIASNTRYHSTKGYLTVQEPPYQTPLSTAFIQAGVEMGYDHLDVNAAKQTGFMLTQSTTRDGARCSTAKAFLRPIRNRKNLHISMDSHVLKIIIDADTKTATGVKFEREGILYTVSAGKEVILSAGAVNSPQILMLSGVGPADHLKQHGISVLADLRVGDNLQDHVSIPGLVFQMDKSFSHIDTRFQNLPALYDYFRNSSGPLTSIGGYEAIAFVNSKYANQVDDYPDIQFHFIAKTPVSDGGTSIRINSGIRDDVWDRYYKPLKWFDTWQVIPILLRPKSVGTIRLAFNNPYASPLIDPKYFSEDQDIKVLIEGIKIALALAQTEAIQKLGTRFYDEPFPGCEQYTLWTDSYWECFSRQFTGTNYNPVGTCKMGPSNDPTAVVDPELRVYGIKQLRVVDGSIIPRIPSGDINAPIIMIAEKA
>c144
EYDFVIVGAGSAGAVLANRLTEVSDWSVLLLEAGEDENGLTDIPGLAANLQLSEIDWQYKTVPQTTTGACLAFNDRCLWPRGKILGGSSVLNYMLYVRGNRHDYDAWSAAGNTGWSYDEVLPYFLKSEDNRNEYLASTPYHSTGGPLTVTETPFHTPLVAAFLDAGVELGYEKNDGNGGRQAGFMVAQTTTRDGLRLSTAKAFLRPARSRKNLHVAMEATVTQIVFDAEKRATGVKFVRHGVHYEVQAVKEVVLSAGAIASPQLLMLSGVGPAAHLRSLSIPVVADLPVGDNLQDHVALAGMVFQIDKPYSLILKEVATVPNMLNFFLRGKGPFTSTGAAEGLAWVNTKYAPVDKDWPDIEFHFIGGSPVSDMSYAVRHGSGIRDDVWNEYYEPLLNTHTWQVMPMLLRPQSKGTIRLASADPFDKPLIDPRYFGVEQDLKVLVEGVKIAIQLSRTQPFQELGTRFYAKPFPGCQNHTVYTDEYWACFIRHYSQTDHHAVGTCKMGPASDATAVVDPRLRVRGLRGLRVVDASVIPDVPSGNTNAPVIMIAEKAADLI
>c145
EYDYIIAGGGLAACLLAERLSVDKSKSVLVLEAGRSDYDAAIIRIPAGVLRLFRSVYDWQYESCGEKNCNGRNVFLQRGKVIGGSSCTFVCLHHRGSAKDYDNWEVPGWSAKDVLPYFKKSQHDNTGKCDPEFHGTGGEWVMDHVRYQNPLSEKFLEVGEKWGLGTNDDFNNWSRPQDGVGRFHVSQINGERCTGGLAFLSKAKRRKNLKVRSGTMAKHINFDDSKTATGVTYDLMGDQTFEAKLKKGGEVLVAGGVFGSPQLLMCSGIGPAAHLKELAIRVISDLPGVGQNLQDHPSANVSFRTPKKGVSVTSKLRLFGKTNPFPVLKWLFFKRGLLTSVGCDYGAFVKTSASVDDQADLQIRFLAAKAVNPDGMTSFTEFRNTKKMEDGYTFQSVCVRARSKGCVRLASSNSHIKPIIDTAYLSEESDLATLREGIKLGRKLGNSNTWGVFKGEEVFPGPSVQTDDEIDNYIRNTLHTANALVGTCKMGSGVDAVVGPDLCVIGVNGVRVCDSSVIPKIPGGQTATPTVMIAERAANFL
>c146
EYDYIICGGGVAGCILARRLKIPKYYYWKLVKQNKIQVMSKYQQKLFLLLIQI*IGLTVVLELSTVMEKTFLYRVGKAWVDLLVLMLCGLGADEVLPYFKKSEDYKKDGNPMYHSKNSGGDHYQVDDVHYQSHLSRLFFDACVESGIKYNNDFNDWDHDQEGFGRFKVSQKNGRRWTAASSYLKKASGVEVKDSYGKTRQIKCKPNGEVLVCGGAINSPKLLQLSGIGPKDVLSKAHVDCKVNLLGVGKNLQDHPAVVITRNVPKGTSATDDMVWRPIGMKPKPRVKAITKWLFQGNGPXXXXLTSPGCDHGAYYRTDKRLQSPDIQYRFVAARGADPDGVLSYIKIAKEGAPASGLTLQVLAIRPKSVGSVEIQSNDPNEKPNVDLGFLSNSADVAAMVKGVKKGREILASAAFNDVIEGDEIWPGENIQTDAEIEQYIRSNVHTANAIVGTCKIGRASDKYAVVDNELRVHGTSNLRVIDSSVMPKIPGGQTASSTVMIAERGADLI
>c147
EYDYIICGGGVAGCILARRLSENNPDSKILLLEAGKAKQNSASVQIPAKVVSTFNSDIDWSYSSTGSQHCNGKNIFIPRGKTLGGSSCINVMLVNRGDRNDYNEWMRRGADDWGAEEVLPYFKKSEDYKQDGNPMYHSKNGHYQVDDVKYQSQLSRLFFDACVESGIKYNNDFNDWDHDQEGFGRFKVSQKNGRRWTAANSYLKEAQNCANGLKVRSSVTVNRILLDKSKKATGVEVKDFSGKNRQIKCKPTGEVLVCGGAINSPKLLQLSGIGPKDVLSKANVECQVNLPGVGKNLQDHPAVVITHNVEKGKASTDEMVWRPIGMKAKPRLKAITKWLVNGNGPLTSPGCDHGAYYRTDKRLQSPDVQFRFVAARGADPDGVLSYIKIAKEGAPISGLTLQVLAIRPKSVGSVEIQSNDPNEKPNVDLGFLSNSADVASMVKGVKKGREILASSAFQDVVVGDEIWPGKDVQTDAEIEQYIRTNVHTANAIVGTCKIGRASDRYAVVDNELRVHGTSNLRVIDSSVMPKIPGGQTASSTVMIAERGADLV
>c148
EYDYILVGGGTASCVLAKRLLEQDPNNKILVLEAGSPDYGHKYIKIPAAVGRLFKSDFDWDYTSSGSTEGGLGANHEGVYLCRGKVLGGSSCTNVLLYNRGSARDYDAWKVPGWGSQDVLDYFKRSEKNSDFQVSGDTKHHGKDGPLSVSAVRYTNPLINTFLQASYKAGYAKNDDFNNWDRDQDGVGPFHVAQKDGERSSAASAYLSSVEAEASLSVVTGAQVQKLDICPEKREAGGVRYVKDGAAVEARVREGGEVILAAGAVGSPQLLMLSGIGPKKHLKDLGIDCIADLPVGENLQDHPAAVVAYQVDKKVSVTDEFKLFGLGLPSPFPILKYFLSGTGVMTSVGCDYGGFFKTAETKKDPDLQIRFIGGLATSPMGISNYSEYAKKWLSWPSGYTFQNICVRPRSKGYIRLKTSNYQDKPVISTGYLTSDEDVESIRNGIKLSRELGSSEEFKKFNPVELFPGPAVQTDEEIDAYIRNSAHSGNALVGSCKMGTDPKTSVVDPELRVVGIKSLRVIDSSVMPVLPGGQTCSSTLMIAEKGADLL
>c149
EYDYILVGGGTASCVLAKRLLEQDPNNKILVLEAGSPDYGHKYIKIPAAVGRLFKSDFDWDYTSSGSTEGGLGANHEGVYLCRGKVLGGSSCTNVLLYNRGSARDYDAWKVPGWGSQDVLDYFKRSEKNSDFQVSGDTKHHGKDGPLSVSAVRYTNPLINTFLQASYKAGYAKNDDFNNWDRDQDGVGPFHVAQKDGERSSAASAYLSSVEAEASLSVVTGAQVQKLDICPEKREAGGVRYVKDGAAVEARVREGGEVILAAGAVGSPQLLMLSGIGPKKHLKDLGIDCIADLPVGQNLQDHPAAVVAYQVDKKVSVTDEFKLFGLGLPSPFPILKYFLSGTGVMTSVGCDYGGFFKTAETKKDPDLQIRFIGGLATSPMGISNYSEYAKKWLSWPSGYTFQNICVRPRSKGYIRLKTSNYQDKPVISTGYLTSDEDVESIRNGIKLSRELGSSEEFKKFNPVELFPGPAVQTDEEIDAYIRNSAHSGNALVGSCKMGTDPKTSVVDPELRVVGIKSLRVIDSSVMPVLPGGQTCSSTLMIAEKGADLL
>c150
EYEYIIVGSGAGGGPLAARLALAGHRTLLIEAGDDQGANDNYTVPAYSPRSTEDPAMSWDFFVRHYADDAQQRKDPKTTYDCPGGVEYTGPDPPEGCEIRGVLYPRAGTLGGCTAHNALINTYPHNSDFQSLADLTGDDTWLPDNMRKYMIRLESVNYLQSALSLVGHGTDGWLGVSHTPLNLATDVQALSFLLGSIFTLGNWTGTPLNLATALAGDQNAYNSIRDPAIYQVLLATKNGRRTGPRDFLRAIENAELPDGSKAYPLTIKLNTHVTKVTFATPANLEPRATGVEFLEGQYLYRASKRAGQGGPGRPGSARASREVIVSGGSFNSPQILKLSGIGPRAELEQFGIPVVRDLPGVGTNLQDHYEISVIGITANDFPALSRCTFGVGEDPCLEEWRTAPRVGSIWGASYDAAGFGAAVHIKTSRAVQDNFDVLALGGPAQFIGYYPGYSADAVAEKNYWSWVILKAHPRSRAGSVTLRSADPLDVPNINLEYFAEGEDDDLQAMYEGIQFSREAYARQPVPVTETLPGADLFEYTKANAWSHHASSTCPIGTDDDPNAVLDSRFRVRGVRGLRVVDASVYPRIPGTFTALSTYLVSEKA
>c151
EYEYVVVGSGAGGGPLACRLAMAGHKTLLIEAGDDQGNVNITVPGYQAVVTQDPKLRWDFFVNHYQDQTRAQRDPKYSYETAPNTYHVGPNPPSGATPLGILYPRAGTLGGCVSHNALIFITPHASDWDGIASITGDNSWAATNMNKYLDKLYEWQPTQPTDPTILLSDLTLTQHLVGGAAVMGAGPDPLNAVTGLAGTLLVDPNSRANPARDSTEGFFQIPLIMKSGVRTSVRDFIATTVQGGYPLTVRQNCFVTKVNFNTTGSTPIATGVEFLDGKQLYRASPLSGAAGTPGTARATKEVILSGGAFNTPQLLKLSGIGPQAELQKFNIPVIKDLPGVGTNMQDRYEIGLNVKHGKDFSVLNGCTFDNKPADQCLTKWQKNPYVLASKGAYATNGLAATMAVRSDFASTTDIDMFIFGGPVNFIGYFPQWGDYAVADHKHFSWYTLKAHTRNRAGTVELRSADPLDTPLINFNYFDTGTTAGGADDLDLRAMIQAIKMSREALDEYKKYSILGGDAFVEEEPGPDVSSDEAIGQYIKDRAWGHHASCTNPIGADDDPMAVLDSKFRVRGVQGLRVVDASVFPRIPGVFIQAPIMMISEKAADII
>c152
EYVIVGAGSAGCAIAYRLAEAGRRVLVIEHGGTDVGPLIQMPGALSYPMNMSRYDWGFQSEPEPHLGGRRLATPRGKVIGGSSSINGMIYVRGHARDFDHWRDQGADGWGYADVLPYYQRQENWSDGGHGGDARWRGTDGPLRVTRGRRDNPLTQAFVEAGQQAGYPVTPDYNGHQQEGFGPYDMTVWKGERFSAAKAYLRPALKMENCDLVRAFARRVVIEDGRAVGVEVERGGKIEVIRAGAEVILAASSINSPKLLMLSGIGPAAHLAEHGIEVVADRPGVGQNLQDHLELYIQAAASQPVSLFKYWNLLGKAYVGARWLFTRTGPGATNQFESAGFIRSDAGVDYPDIQYHFLPIAVRYDGQVAAEGHGFQAHVGPMRSPSRGEVTLRSSDPHEAPRILFNYMSHEKDWADFRKCIRLTRELFEQDAFKPYYKHEIQPGADVQSDDELDDFIRQHVESAYHPCGTARMGRADDPTAVVDPETRVIGVEGLRLADSSIFPRITNGNLNAPSIMTGEKAADHILGR
>c153
FAASYLAIVVQTVDNLPRTTYDSIIFEGDTADAVLANRLTKISKFHVLLIEAGPSHFIFRITCLLLPSMSTHRNVGVLAYEVPDQLSLRFSLGHTLGGCSSHSMYYSFYIANDIFQDDGSSQLHV
>c154
FAFEKSASSRYIGQDYDIIIIDTSAAGCVFAARLPEDPNISILVLGAGGNRNDYERVYYPG
>c155
FAPEDFTEGAHLDERYEWPVSYSDLAPYYELAEAALVVTAGQPFANFPQNTTRFRSRPPADWRDLAAHVESFGHHLGSLPMAKGTPWMIAARGTEFSSYHSIVAPLLTSDLFTLVRGAQVTRLNWNSAKQRVESVEYTDRVSRRLTTMRGRAVVLAAGAVDTTTILLRSVSSEFPQGIGNSRGLIGRYLHDHPKEWWPATPSHRMSALAHPMYLSRQPYDPANPLVASSLTIGLTSHRINTYLRRKTRSFGVQVFGTMIPRPDVGVSLPKAAGAAEESRPLINLRYDQAAIDNMVHARQRLRDVFASAGTSVAVDGPFHSLMPGSSFHFGGTVRMHRSPEFGALDGWNQLYDAPNVIVCDSSCFTTGPEKNPTLTAMAIAARAGDHLADDLL
>c156
FARGYGLYVGAQRPQIPGLLRALRGMGPEFKKRVREIYPALVYVGAAGEILAHPDNYVDLDPGEKDEFGLPLPRFHFKFHENELAMAKDALEKCQTILEVSGGVRLGANETPHPEFDGENLVGLARMGDDPRTSVVNRSNRAHDVKNLWILDGASFTSYAEKNPTLTVIAVAAREPGARKPRRFGNQSGRPLGPGHGDREVLFLFSCRKGNGRHRG
>c157
FDFIIIGAGNSGCVVARRLSDAGYSVLVLEDGVDWQKERDAWDISRKRRQVLALWETPMAKKFISKPNKKLLGRTLDIVLGRTLGGSTGINAGLYSRPAQEEFDLYWPDKWKSKDVLPFFKMFENYHGPTNAIDNHGTDGLLTVQPPSHAHTYSSAWLKAAEQATINVVIDGSSGLNNESGVYRLQQTWKDGRRQDAFTSYLLPIMPRDGLEVRSGANVAKIIFEEENGKQTATGVIYQLQGLARVTVHARREIIVSAGWAGSPKLLMMSGIGPKDNLEKFDIKVEVPLEGVGQQLVGRPLMNLLFGGQRITPEEMPLLFTSQGSDIEWALNGTGVLDMAIEDIYGKEKSGLDDKDKTDFLMSFSNILGSSGNIPLQTLFSLCKVCRPKSRGFVQLQSPNPYEVPEVSFDMLGDDYDMDILVACVKKTLSVYRHFRFQDLDLLGLHEMKDTQLRELLRAQVIFSYHAWGSCRMGDGPLDVVEPDGLRVRGFANLRVIDGSVMPEGPCSGPMATTYMLAERGAAFILG
>c158
FDFIIIGAGNSGCVVARRLSDAGYSVLVLEDGVDWQKERDAWDISRKRRQVLALWETPMAKKFISKPNKKLLGRTLDIVLGRTLGGSTGINAGLYSRPAQEEFDLYWPDKWKSKDVLPFFKMFENYHGPTNAIDNHGTDGLLTVQPPSHAHTYSSAWLKAAEQATINVVIDGSSGLNNESGVYRLQQTWKDGRRQDAFTSYLLPIMPRDGLEVRSGANVAKIIFEEENGKQTATGVIYQLQGLARVTVHARREIIVSAGWAGSPKLLMMSGIGPKDNLEKFDIKVEVPLEGVGQQLVGRPLMNLLFGGQRITPEEMPLLFTSQGSDIEWALNGTGVLDMAIEDIYGKEKSGLDDKDKTDFLMSFSNILGSSGNIPLQTLFSLCKVCRPKSRGFVQLQSPNPYEVPEVSFDMLGDDYDMDILVACVKKTLSVYRHFRFQGLDLLGLHEMKDTQLRELLRAQVIFSYHAWGSCRMGDGPLDVVEPDGLRVRGFANLRVIDGSVMPEGPCSGPMATTYMLAERGAAFILG
>c159
FDFILVGGGTAGCVLASRLTQYLPDKKVLLIEAGPSDFNEDRVLLLKDWLSLLGGDLDYDYPTTEQPMGNSHIRHSRAKVLGGCSSHNTLISFRPFEYDCRRWVAQGCAGWGFDTFTRVLDNLRNTIQPVHYRHRNQLCRDWVQSCSSALGVPVIHDFNHEIREKGGLKESVGFFSVAYNPDDGRRSSASVAYVHPILSGKEERPNLTILTNAWVSKINISGDKATGVTVTLKNGTTHSLAAKAETILCAGAVDTPRLMLHSGLGPKKQLDELSIPVIKDIPGVGENLLDHPETIIMWELNAPVPQNQTTMDSDAGLFLRREKPNKHGDDEDWVDIMMHCYQIPFCLNTSRLGYDEPKNVFCMTPNIPRPRSKGRLYLTSKDPAVKPALDFRYFTDPEGYDAATIVAGF
>c160
FDFIVVGAGSAGCVCASELAKANCSVLLIEAGEELQNSSLIRIPRNSHKLWRTEADWHYNTVPQKHLNNKILPAERGKTLGGSSSINHLIYVRGSPEDYNRFAYQYGLGEDWSYKSVLTEFKELEKVDADRLGLSSSTTISSRGTNGELEVNIPYPAKQDAVSFVNAGVEAGYARNIDYNGSHGQAGFSLSQHQVSPLSHRRQDAFNCFCEPICRKDNFHILSNTFVRKVLLNENNNKAIGIEIEQFDEIFNLYCAKEIVLSAGSINTPQILQLSGIGPRKELNRLDIPCKVDLQGVGRNLQDHPSSVIAFMLKPEVSLNTNRELEYAAVQSLGYIQSPSIIADEKRDNIKYGCDLQLNLSSGFVSSTRKFFTPIATDNPELWNHDKTLIRQILIEKAQEQERLTENVVPPQVIAIVVMLNLCRSRGQLTLNSNDPHDKPNIDPNMFENENDLNAMMHGLREAYKISQQPSLQKIIQQATLSKEVLDNDDLLKEYLRKDTGSTWHHCGTCCMGDVHNNPNAVCDSKLKVKGIDGLRIADASVLPFCTSGNINTAILMIGKK
>c161
FDFIVVGAGSGGSTVAGRLVEHGFNVLLVEAGPPMHHLQYIPALHTTFNVNSPYVWKYKTEPHKHMCKTCREKRSTHNYGKCLGGSSALNFMNYVRGHAADYDEWESFGNVGWSFKNVLPYFKKSEKFHNPRESTSPIDEEYHGTDGRLWVMPTTEDVTKLHHIYLNAFQELGYQNGDYNGVLQDEEVIMQAQVTQENGFRSDAYTSYIINSGLESNKNLKVLTFSHVTKLLHGSDGNKDRRIVGIEIDRFGKKIELKVTKEVILSAGAVGTPKILLLSGIGPRKHLEEMEIEVFHELPGVGGNLQDHVITAMFIKGPEDSNQISSNIFKINPLEILKYYFTRSGPLGDNGIGIGVYHDTPSNQDRFNRTSIQLNTFPASWSTDYGLGLKDLMGFDDDSYNGFSKQFEGLNTGILLPTLVHPKSRGNIRLRSKDPFLPPAIEPNYFENSEDINTMVEALKISHKISNTESFVSNGFEAAVDSFHCGGMEPFSTQYFKCYIEHWSGHVWHIVGTCKMGPDSDPLAVVNPRLKAHGLNGLRIVDASIMPTIVGGNTNAPTIMIGEKAADMI
>c162
FDLVLVGAGSAGSVVASRLSENGNYSVLLLEAGGYPPLFMDIPLFSASLQLTPMNWDYRTEPQKRQRCPWPRGKVMGGSSVLNFMAYVRGNKMDFDNWKSLGNIGWGYEDVLPYFIKSENNVGKPYHGYNGLLTVEDRAWKSSLPDAFMEAGLHLGYNLVDINGVNQSGFMTPQVTARKGARCSTYRAFLENFKDRPNLKIVTHALVEKILIDDSNRAYGVQYRRGNRVVVVKASKEIVLSAGAIGSPQILMLSGIGPEHHLKEMGVKWDYFMHGKGPYTTNGIDGMAFKASKYSQHPDWPDLQLHFLTYSCSSRKILALNENMWTDFYESLSHAATASLFPTLVRPKSRGWIRLRSTDPAEHPLIDPQYYSHPDDVKIMLEGIRFAKETLDTPVLKKLLTLHKVSNPYCKDHPADSDSYLECLIMHSTQTIYHPAGTCKMGPAEDPDAVVDPQLRVYGIQGLRVADASIMPLITNGNTNAPTIMIGEKASDMI
>c163
FDYIIVGGGAAGCVLANRLSADPAHRVLLIEAGGDASRDKRAQVPWAFTKLLRSEYDWDFHVEAEAAVNQQEVYLCRGKALGGSSVTNVMLYHRGSPADYDAWEEAGARGWGAKDVLPYYLRVEDYGDGASQYHAVGGHVSVQEVPYQNQLSATFLRAMGQLGFRPNGDFNDWSSPQEGYGRYKVTQRAGRRCTAADGYLAAARERANLVVVTGAQATRLALDSAYDGAGRLQVSGVEFARGDEREPCSVRLARGGEAVLCAGAVQTPHLLLLSGIGPAEHLREVGVAVRADLPGVGSGLQDHPAVVVSYESKKAVAATDDALLKGYASLVNPLAMLRWLLFGRGPLACAACDHGGFVRSSPDLDQPDVQIRFVPARASSASGMNTLIDLGRRARFLPGFSTQVVACRPRSEGRVRLRSADPFAKPIIEGIHLGAAEDVASLRHGIRLGRQVCAAAAFDEYRGEEVFPGAAVQSDEQIDEYIRSSVHSANALTSSCRMGDPSDPAAVLDSHLRVRGVGGLRVADASAMPRIIGGQTQAPTYMLAERAADIL
>c164
FDYIVIGGGSAGGVLAHRLSTDPNNKVCLLEAGGAGNNKLVSTPGAFAALIQDFKINTINWRYNTLADKSMNNRTQYQPRGKMLGGSSGINGMVYIRGCKEDYDHWESLGNKGWAYDDVLPYFKKAENNERGENKYHGVGGPLEVSNGDESFDVYNGFIKSGLEKGYKMNEDFNGDYQEGIGYYQFTVKDGKRAGVKACYIDPAMERSNLTVETGAQVQRILFEGKRAVGVEYMQDGKLVTVKAAKEVLVCGGTFNSPQMLMLSGIGPKAELEEKGIEVIHDLPGVGKNLHDHPDVILVVKSKKKSGIALNLVGTIKSTIALFKYALAGKGWLASPPTAAGGFIKTSPEKERPDAQLHVVPLAYRDHCRDYKIMTKWGYSVIINTSNPKSRGELTLKDSNPMTPPNIKLNLLSHPDDMKDLREGVKRLLDILNSDGFNEHRDCLLKPDVPLNTDQEIEEYLRREASHAYHPVGSCKMGNDDMAVVDERLRVHGLEGIRVVDASVMPTVTSGNTNAPTIMIGEKAADMI
>c165
FDYIVVGGGTAGLTVAARLIEAGNTVAVVEAGGSYQVEAGLTAIIPGFAAAAQVGTSASDDATLIDWNFVSTPQSGANGRELRYARGRCLGGTSARNFLLYHRGNKGIFDVWASLTNDASWSWDSVFSYFKKSVTLTPPNTSIRQANATAIYNAAAFGNSGPLDVTWSNYASPLGTWHEKGLAAIGIAPGADFQSGSLNGSTWIPLTEKAEGQTRESSATSFLEGVLGNSKLKIYAHTMAQKITFSGNTANGVNVRTLGLNYKLTAKKEVIVSAGAFQSPQLLMVSGVGPQATLQSNGIQVIKNLPGVGQNLQDHILFGVTHPVNVITATRVQTDLLYAAEQLANYLTGRGPLTNPGFGMVAFEKLPAASKANFSAATKAHLDNLPADYPEVEYIGVDAIVNGLADAEDQNVKDGNNYGALGGALMAGKSRGSISISSSNVNDAPVIDLGYLTDPVDQEIVVALFKRIRDAWAQSNISTGPEKFPGAAVQSDADILNYIKSTIAPVWHASGTCKMGISSDPAAVTDSHARVWGVKNLRVVDASIFPMLPPGHPQSAVYMVAEKIA
>c166
FDYVIVGAGSAGCVLANRLSALGTKSVALLEAGPPDSSAVIHTPGLLGLAVGQNKVINWCFETVPQKHVNNRRMFWPRGKTLGGSSSINAMIYIRGHREDYDDWKIPGWSYDEILPQFLSTERQMNMESVDAEFHSTNGQLSVCNPIQVHDLSRKYIQGVQEQGEVLTNDFNGKQQEGFGIYQVTQINGKRCSSAKAFLTPDVKRRSNLTILTNAQATRVVVDPATKQVQGLYYVDNRVVTSKSSKAEVETNEELIEAGEVILAGGAVNSPQLLLLSGIGPREELARAEIEMIHELPGVGKNVQDHLDVIAAVREKGNTSYGVNLTLSGLWRSTKDVAQYLSSSSGPLATNAAEAGGFVRSSLSDHRPDVQFHFVPGLLEDHARKMVLGHGFSLHACILNPRSVGEIGLNSGHPLADPMIDPNYLSHPDDLQVLLEATKRAREQLKSSPLAPHYGEEMHPGSKYQSDEELVEWIRTKSDSVYHPVGSCKMGISSDPTAVVDPELAVYGIKGLRVADASIMPAVVRGNTNAPSIAIGERCASILT
>c167
FDYVIVGGGTAGCVIASRLSEYLPSKKILLIEAGPSDFNNEKVLQLKEWLTLLGGDLDYDYGTVEQPNGNSHIRHSRAKVLGGCSSHNTLISFRPFEYDLKIWESLGCKGWDFKTMMRLLDNLRNQIQPVHPRHRNQVCKDWIESCSTALDIPVIRDFNKEIRETGSLQQGVGFFSIAYNPDDGRRSSASVAYIHPILRGEEKRPNLTVLTNAWVSKVNVSGKTVTGVNIALKSGTKYTINPRTETIICAGAVDTCRLLLLSGIGPSKQLEDLSIPVIHELPGVGENLIDHPESIIMWELNAPIPPQTTMDSDAGIFLRREIKDAATNNTDPALNPKRIPDGTIADIMMHCYQIPFCLNTARLGYEAPLNAFCMTPNIPRPRSRGRIYLTSSDPTVKPALDFQYFTDPEGYDAATIVAGLKAAREVAKQEPFSKWLTKEVAPGPKIQTDEELSEYGRRVAHTVYHPAGTTKMGAESDKMAVVTPELRIRGLKGVRIADAGVFPTMPSINPMLTVLAIGERAAEMI
>c168
FDYVVVGAGSAGCLLTRRLAAAGYSVCLLEAGGSVAEDNNDSVNDPMKYGAAFGTELNWGHATVKQPGASGRHIRCTRGRGVGGCSLVNGMLYNRGAREVYDRWGDGIVSTAWSADACLPYFKAHEDNSRGGSEFHGSGGEVRVSDIPQAALSPIAEAFHQAAQQAGHKANSDQNSLAPTHTQLGVQVYQCFVDERVGDGRRVTASRAFLPQGVETFVNNPEAGELTMHTRCTAAQIVLESGAAGPRARGVRFLTSEGDPATATARNEVVLTAGVIGSPHLLLLSGIGPQTAFRPPLELDPAGEGGWQWPQCAVALESVGKHLVDHPRVACRWASVADGIDLSSCYSHVEGCLYARSARAVRAAERGLALDAVPDIQIQQDHVRTNDDMLAEPPLSTGFNLKPHVAQPRSEGTVSLLSADPRAKPRIDPCYLSDSGGADLQCLVEGITAARRVVAQRAFDFCRGEELLPGKDVQSQQQLEAWVGANV
>c169
FFRSHPDKPLPDMQIHYVSVAMQDVHGREGVLSDHGFSSIVYACRPQSRGRIGLRSAAVTDAPAIYPNYFSVEQDLIDTRNGFRETRRVFQQPAFDPYRGAQLKPGPDVNVDDDAELDEWIKATGETLYHPVGTCKMGSDPMAVTNENGQVHGVQGLRVVDASLMPTLIAGNTNAPTIMLAEKISDHILGKAPLPPSSIMAKAQA
>c170
FGAGFYVILHALSSFQAETTLPPDPDVAAKHHLRDVDPRFHGDSGPLVKSYAAHYSIGTLHDPLIDTFRNLDVPINYDAVRANDGNKLGFTSTFTTVDSRTATRTGSGKSYLEPNADRKNLVVLTGATVTRVTFLKGSSPLKATGIEFLRGEKTYHVAIAKEVLLAAGRSLWHRKTPDATVDPTVALNLTGTFQTPQILELSGIGNKDILSKHAIETIIVGPTIREIDPKHETLDGAQQPERVARAQELLLSKKGPLSSAPSVIFAFLNAKTFASNAQIGQWKQEVQITASAVPQGLKKRLEKQTEWFVNESSVEGELMLIAGFLPSTGIKPPSDMAHYMTIVSTLMHPLSRGSVHIASADPTAPPAIDPKYLTHPQDLQMSLSLLKLTLKVFETKPLADDVRGLVAPSPDQAATDEGLIEHIKNSCSCVFHPVGTASMLPREDGGVVDPQLRVYGTANLRVVSASSSPVHVMIKAECTTCQVDASILPMQLSAHTQGTVYALAEKAADIIKGL
>c171
FGIECVAHVPGVGQNLQDQPAVVVSSPVKREFEGKSITDQIYSVRGNIRKRALLSWIMFGKGPLTSTGCDRGAMVRTSAAQGHLPDLQMRFVPGMALDPDGVSTYTRFGNFKKEGRKWPSGVTFQVVATRAAGKGQVSLKSDDPFDSPLIVPGYLTDRDGRDMATLKNGIELARKIASTGTMSSVLDGELFPGADVSTPAAVEEYIRKTIHSSNALVGTCRMGTAAENGDVVDQDLKIFGLEGIRVVDASVIPIIPGGQTGAPTVMIAERAADMM
>c172
FIRPIRNRRNLTILAQAHAERIVLSGRKATGLEFRHNGTPSSVEVSGELILSAGAIGTPQILQLSGIGPGSLLQGHGIQVQHDLPGVGENLQDHLQIRTAFKIADAQTLNERQASLWGKVRIALEYAFWRSGPMSMAPS
>c173
FLAAVEAKGVAPLVEDYNVWPGGMPGAGHTQANIGEGGGRQATATTYLGRALRRERAANLRVLTRAHVGRVLFDKSSGDRGEPRATGVEFYAEALGANAPLVARLAEGGEVVLSAGAVGTPLILQRSGVGPRELLEPLGIDVVVANANVGANLQDHIFTPLAVLTNTSTLGNHAITPGAIGEYARGATGPLASDLIEVMAFVDLGTHNETRGAPDIQFHFVPSRADPIYCSAMGFNGTWCDEMVKADAAGVDSYLLLPTLLHPRSTGTINITAADPLAPPAIDANYLSDQRDVRALVRGLQLAADMIASSPLREISTGLMNCVNWPQSFVDKTGLTSPESSPNWNLPNASDEEFWEEYVRTFSLTVYHPTSTCAMGAAEGDSCALPDLRVRGTRGLRVADA
>c174
FLRYALVVLSTALASGILSERCLSGDVCGDILPWQHEPSAPSVRSHLAALQTVSLNAAANRYYDHIVIGAGAAGSTLARSLAERGRRVLLVERGSPRISHVLTQSLYGAGLVIADDGVGQTVRTKNGIRTTLGAVFGGGTALSMGIQIEDNDYPPQLQLDPSAFQQAVLWTRQHFSSFMPPIPGYTDTVHQAFAHALQHHPLSDTDHHPPSHHPPSDTDHHSNQHYDIQYNAVWNGATLFNASENFFRRSSDSCLANAYEPQPSTLDVLPETWVERIAFTQTRDQPRPRAACVLVRPARAHDRRVLGGQVLAPKPKLRHSLPTPRRQALVNTQPPGWGFLEEFISRRRRRLEEGLVELCAAEEITLSAGAVHTPLILARSGVGNTEQLGLLGIRNPVLVNEALGRNLGDRTLVPIVLFRKHSTGRGHELESSVCGAISAEENPDGLLIVAQEATGGRIVEGLALATRIFLAPLARSTSASDALVFTVNFCSERPRSNLLCDLVRKAPQCLRKLTALWTFVTQPKSRGIVVQDAKGNVVVDPAYYSHPDDLDAAIRGTEMLIDVVRSGLLDNEFENPTQDSCIHTLHDTVSLAVNHYRTAMEEHDQTHVSWYTDGNKNRTRSRINRSPGAGLVGAGPVGARGPDSLTRSLIERSVNGRAATEHLGTRRTNKPDELTDGFSQAAGGLPGSVVLPGILWALGPHHKVVGQNVSTFPNQLPLSKKGVVQLVEESSQSMWHLHGTAAIGTVVDSQFRLKGVSGLSVVDASIMPKLTKMNPTAFLLALGRYVALVRSPI
>c175
FLSTQDDTTGRDSKFHSTGGEWTMSEVRYQNPLSKKFLEVASGELGSNDDFNNWDRPQEGAGRFQVSERNGCRESGATAFLEKALERKNLVVRTGAHVRQINFDESQAASGVTYNLVGDDTDMSFSPVLAEGGEVILTGGAIASPQILMASGVGPKSHLEEMGIPVVANVAGVGENLQDHPAAVVSYESPVEGVSVTSKLRIKGTKLNNPLPILKWFAKGKGELTSVGCDHGAFVKTESSKSDQPNLQVRFLPAKALGPDGMTTFTQFRNAKNHADGFSFQSVAVRAKSKGRVRLASSNTQVKPSIDGKYLSDPEDIVTLREGIKLGRKLAAEFGEYLGDEVYPGPEVQSDDEIDEYIRGSVHTANALVGTCKMGDDSMSVVDADLKVKGVKGVRVADSSIFPSIVGGQTGTPTVMVAERAADLI
>c176
FNFICIKLHKLDLWKANLPTIQRILDLISSGAEMLWKVSIPRETHVFLGRRCPRWTCLWGNDEYVRSCAHKNSRGSAPSLINLPGIEYPYHRTIRVQKLNSSGMEQTECYQYTCEYFDRDVVLKECKIQEVDFIVVGAGTGGSVVAGRLARAHEHSEVALLEAGGPYPTGSMFPGSYSAYAKPESPINWNFVIEKQKHACLGYKNGTCLYPRGNPYDYDRWASKGLKGWSYDDVLPYFKVSENNLQIGEKYSQTYHGNIGLVPVSQFRDQPKMIEKMLRAAEEMQFSTNHDLNGDDQIGFTIAQATTYNGTRVTKVLLDSNCKAIGVEYIKNKKKMHLYARKEVILSAGAIQSPQILLLSGIGPKEHLKDIGVPVIKHLPMVGKNMQNHVAYTVKFKLKDKCLDDLLNNDSLYEFLRYREGPMTSTGLSQRYISLIPTLLHPKSRGIISLRSKNPMDPPRIAFNYLEDEDDINSLINAIHFVLKMAKTSALKDSIELDNKPETFCENEKHTERYWECAIRYWTNPENHQTGSCSMGTNEETSVVDTELRVHGIGHLRVIDASVIPITISGNINAPIMMVAEKGADMILTYWAHEDHHQQTLEWFAMPTHGMEDVQEEMLSFSSQLLGMVWSYSNNYFFVVLIIHSDNLAKAITILILAAIGAHGYLRQRAETQYFDTLLKQPKCARALNEKSSLPHTCGTSYTGSGSFMVTVEEILQRQCDLVDPIRGQENNLNLQEDQTVDFIVVGAGTAGSIVAGRLATTTQQWQVALLEAGGPYPTGAMFPGSYFSYAKADSGFNWDFLLEPQEYACKGQANGQCHWPRGKALGGTGVLHGMMYMRANPWDYDRWASLGISGWSWKEVLPYFMMSENNTQVGSVYSSEFHSTQGPVVISQFRDHPTFAEKILAGGGELGYNYGTDLNGKSQLGFTLAQATQFNGSRLSMYNSYIAPLVANKQSNLIVSPWSYVTKILFSDDQKKAVGVEYVKNNATHRVYARKEVILSAGTIQSPQIMLLSGLGPKADLEKLNIKVVQDMPLVGKNLQNHVSYSIRFKVNEDHYEERLNDDSLYAYITQRQGPLTSTGMSQTTGFVRVNELDGSPNSVPQVQMFFEGYLANCSTDGLTTGHCGELRYITMTPTLLRPKSAGTLTLRSANPMDPPVINANYLASAEERQTLVDAIYFTLKLAKTNALKDYVTLEIPPTTNCTAEFGSYDYWYCAIQYWNNPENHQIGTCKMGNGVETSVVNPELKVHGISGLRVVDGAVIPEQVSGNANAPIMMVAEKAILLLAAIGAHGYISQRVELQYFDTLLKQSKCPRALNEVSSLPRTCGAGYTGTASYMSDVEELLQRQCDLVDPIRGQENNLNLQEDQTVDFIVVGAGTAGSIVTGRLATTTQQWQVALLEAGGPYPTGAMFPGSYFSYAKADSGFNWDFLLEPQEYACKGQANGQCHWPRGKALGGTGVLHGMMYMRANPWDYDRWASLGVSGWSWKEVLPYFMMSENNTQVGPVYSQDFHSTQGPVVISQFRDHPRIAEKILAGGGELGYNYGNDLNGKSQLGFTLAQATQFNGSRLSMYNSYIAPLVTKILFSDDQKKAVGVEYVKNNATHRVYARKEVILSAGTIQSPQIMLLSGLGPKADLEKLNIKVVQDMPLVGKNLQNHVSFSIRFKVNESQYVERLNDESLYAYLTERQGPLTSTGLSQTTGFVRVNELDGSPSTVPQVQMFFEGYLANCSTDGLPSGHCGEVSFTLKLAKTNALKDIVTLEIPPTTNCKAEFGSYDYWYCAIQYWNNPENHQIGTCKMGTGVETSVVNSELKVHGISGLRVVDGAVIPEQVSGNANAPIMMVGEKGADMIKKTWASA
>c177
FQIALLTFFLQAPHVEGVAPLDEGVKNITFDVIHSFRTFMEQIPYALINASADFQNAFPMYPITDLPYPDDYFDFIIAGAGPSGCVLANRLTQHKDINVLLLEAGEEPSILVEQPTLAMAVTVTKYSWTYKPEPQREVCTGKSGGG
>c178
FRKRDFERVDHHGGGVSPAWPISYDDLAPYYTEAEALWGVHGVRGADPTDDAEAPPYPFPALKHDPTIARLKSQLTGMGLKPFEMPVAVERDEERPATSPCIRCRTCGGYPCLREAKSDGRKMVARAEANSNVELLPNARVTKLETDRSGRNIAAVVYETVDGERRVKGDIVVLAAGAINSAALLLASAQGRHSNGLANGSDQVGRNYMFHTASASLTFSPAKVKTDFPKTMALNDWYWGDPDGGFDYPMGHVQLLEYLHGDVLRGQISNQIPAWLVPKPFADALGDRALAFLVMTEDLPEKRNRIRLTRNGQIRVDYWCNNLTAHKRLIGRFHHYMTRSGRICRCLRGYEARLDGILPIYGTAHQCGTLRMGSDSKSSVVDPTCKAHEIDNLYVADTSVFVSSAAVNPALTCIANALRAADTIRDRMG
>c179
FSKIIVGAGSAGCVLANRLTEDSNNKVLLLEAGPKDTILGTKWLQWKIHMPAALTYNLCDDKYNWFYHTVPQKNVNNRVMYWPRGRVWGGSSSLNAMAYVRGHAEDYNRWERQGAAGWSYEDVLPYFKKAQTHSHGGDDYRGHDGPLHVTRFPGEGELDQAWLKAGQQAGYPLTEDMKGERWSAASAYLRPALQRENLTTMNDVLVTRILFEGKKAVGIELVQNGVTKKYRADEIILSGGAINSPQLLMLSGVGDSDHLGQVGVNTVHHLPGVGQNLQDHLEVYIAQGCKKPVSLLRDQKGLRMIKVGVQWFLNRTGSASSSHLETGGFIRSSAAVPHPDIXXXXQFHFLPSQVIDRATSTGSIKLQSNDPREHPLLDPNYLDSEQDKYEMRQCVKLTREIFAQEAFDDYRGDEIAPGTDVQTDEEIDEFIRKKGDSAYHPSCTCKMGDKGDNMAVVDSQCRVIGLDNLRVVDASIMPSIVSGNLNAPTIMLAEKAADIIKGK
>c180
FSTGDRRTWLDLLLLNEDIYKPFVDDPRTDHEYFGLRGSRLFMKGGTTNHWGGLTPRFKPEDFELWSRTGFGADWPITYDDLAPYYAKAETLLGVTGDSENDDPPRYGEKYPFLPTAFTLGDQVVIDALESMGISYGHMSIARNGNRCITTGTCNYCPVNARYTALFDLQLLQNEYADRLTVRTDSPVSQILMDGKVRCRGVEVLELSNGGRRPIEADAVFICAGTIESCKLLLSSVSSEWPDGIGNDSDHLGRHLVGHPVMDASGVREGNPDSIGEELGFDSLISRHFDTPEYQHKGKMWFSGSTSASRTLEEQLLANVSRADLDNQRKSEIRISIGGEMEQFETPENRVRLGAGMTRHGLPNTIIDVGVHDINLQARQEHVNTFVKVLKAAGCRESSIETGALNPDGAHASATCRMSLSDADGVVDPNLQVHGTDNLFVCSNAVFPSIAAANPTLTVSALAVRLAEFVNRAM
>c181
FTHVIVGAGSAGCVLANRLSAESSHNVLLLEAGPKDTILDSIRLSWKIHMPAALTYNLCDDKYNWFYHTTPQKHVNNRVMYWPRGRVWGGSSSLNAMVYIRGHAHDYDRWQDEGADGWNYDNVLPYFKKAQNHQLGGDAYRGDSGPLNVSVGSFDNPLFQAFIDAGQQANYPFTSDMNGFQQEGFGVMDMTIHEGKRWNTASAYLRPALHRKNLTTKEKCLTTKVVFDGQKAVGVEYIQNGKVHTVHATEEVILSGGAINSPQLLMLSGIGNADELTKLGIPVVANLPGVGQNLQDHLELYVQDKSKKPITLYSAQKPLNMIPIGLEWLWKYTGKASSAHLHAGGFIRSRGDENLTHPDIQFHFLPSQVIDHGRKPSECEAYQVHVGTLRATSRGWLKLKSSNPKDHPIIEPNYLSTEEDRLELRECVKLTREIFAQPAFDEFRGEELRPGKHVQTDEEIDAFVREHCDSAYHPSCTCKMGSVNDPMAVVDPETKVIGVENLRVIDASIMPSVVSGNLNAPTIMIAEKAADILLNK
>c182
FTIPDLTTENGVRESVAEAFIKPNLRRANFDVLIHAHVAKILFDENKRAIGVMYYHKKKVAYARKEVILSAGAVDSPKLLMLSGVGPSDHLKSFQIPVIADVAGVGQNFHDQPILFGIIFTVDKGNAWNFFTSFLNVSAHKDYVYRRKGPLSVTIGVESNAWHQISGGDPLYPDLQVLLMSISVATDFGLFVSDAFGLKREVSLC
>c183
FWTYPKNKLDIGALHYDRVVRDPNITLCLDATLTKIEAEKNRVTRVHVSSDAGKVFTVEAKNFVLATGAIENARLLLVAGLGGPAVGKYLTNHPKGNLAVIHPAPGFVYEREWFKRIRNDGGVYRISLGLTEHTQKSLGLLNSYIQIEPIYSQKFHARLLRKAGIYSPILHIAVVSYLEQAPLVENHVSLLPETDALGIPRIKVSWDVRPVDTNTIIKLHTLLRENIKRIGMGDLDTSMLENSASDWFRLRDGGHYASTTRMGTDLQTSVVDADSKVHGVQNLYVTGSSVFPTSGNANPTATIIALALKLGHHLCHA
>c184
FWYAASDVGITARQDPNAGDATGLFRLVRALDPLAKVRSYAKTVHYDRVAKSRPNYHLLPEHAVSKVLFKDKRAVGIEYVSPATGEVQTAKPTKEIVMAAGAVHSPQILQLSGVGPKALLKGFGIEVVVDLPGVGQNFQD
>c185
FYTLILFNCQKFFDQSLPKYDIYDYIIVGSGSAGSTIASGLKGKVLLLEAGSNGDNFLLNIPILQPLLQGSPFDWNFKTSSQENSCLALQENQNSWPIGKIFGGTHQLNNMIYHRGHYDDYKWLIDKKKAEKVYKDYEENIPIDQGKFVSIISTAFVEGGKEMGFEDFSYTNLTHLNGGRFTQINNWNKLENSPETCLNAIVSRVLFDEKNPKKAIGVEFLKKGKLHNVYGRKIILSAGTVGSPKILLHSGIGPEEHLTEVRIKCRENLPVGENLQDHVTTGLDLIILNQTLGLSINDIVNPFKVADFFWFNGDGSPLALAGCDAMGFVKLNRSNEVPDLSFMLLPVGLIADYGLHLRKITNIRDEVWEKYFKPLIGQTTISILPVLLHPKSKGTLRLKSKNFLDSPVINPNYLDNKDDIRKLISGIRIIEKLIETPSMKKFGAEINPKHFPGCENFFLDSNDYWECYIRHMTMTMFHPVGTCKAGNYEDTSTVVLKNFQVKNIENLFVVDGSIIPQSPSANPHGVIAMIAQKFVNDMISTSP
>c186
GAFVRSMPGANRPDTQLYMGAFSYERTEGTRPVQLSTPDKEPGITIYGQLLNLTSEGEVMIGSADPDIPPAITPNWLQTEYDQKAVIQMVKTMRRFVRETGASRYFAEELIPGSHVRTDEEILDAVLHGATSGLHGTGTCRMGKEGEAPVSPEGEVWGVRNLRVVDASLMPEITNGNLNAVVIMMAEKIAAQMLGVAV
>c187
GAGRFLVSERNGARCCAATAYLAPALGRSNLTVLSGVYARKLSISNNACTGVQFCIDSSATFEARTASDGEVVCAGGAMQTPQMLMLSGIGPKAQLKEHGIPLVADLPAVGENLQDQPAGVVSYAVKPQFKGISSTGCDHGAFISLANETSPRLQLRFLATRAVTADGMGSFTTFRKTPNHPDGFSIQSIAARPLCRGRVMLKSASPEDRPILDYDWLNDEDRATLRDRATLREGMRLARRIAKTASFDQYRAEEVFPGEAIQSDAELNEYLDQSVHSANALVGTCRMGPDARDTVVDSRLRVHGVARLRIADASVFPQLPGGQSGPGGQSGAPTVMVAERASEFL
>c188
GAIVDANQAARVMGYITEASASGARLVAGGDRVVINGSNNFIQPTLFTHVTHDMRLSREEVFGPVLAITPFDTEDEAVQMANDXHRLGQYRGRPGRDPENHLVSVALSLSKRPRETPMKTDYDYIIVGAGSSGCVLANRLSADPAVSVCLIEAGSHDNSLRIQTPAGTITLYKSKKYSWNFFSAPQKHLNGRSLHTPRGKALGGSSSMNSMIYIRGHASDYDRWAQAGCPGWDWNSVLPYFKKSENNRLGQDPRLHGTTGELNV
>c189
GASEFHGGDGPFKVSDVPYQNVLSKAFLDACQAMGLARNDDFNDWKRAQEGFGRFQVSQSRGERCSAASSYMAKAAKRENPRLNVDGGDVRGVVYVDRHGAEQYAALAAGGEAVLTAGAIGSPQLLMLSGIGAAGHLRDVGVRPVVDLPAVGRNLQDQPAAVVSYQIDRPVSVTDDIRLGGWPNPMSFLRWYLFRSGPLTSPGCDHGGFFSTAGRAALPDLQIRFIAAQASSPDGVSTYKNFGRSWGGATFRSGFSFQPICVRPKSRGKLELTGDTVHDKPAITTGYLAEDSDARTIIEGIKLSREIARQGPLAGYVEDEVYPGAGVENDDDLLEYIKANAHSANAITGTCRMGVGRDSAVVDTSLNVFGVGNLRIADASVMPTIPGGQTAASTVMIAEKAADMILAK
>c190
GASEFHGGDGPFKVSDVPYQNVLSKAFLDACQAMGLARNDDFNNWKRAQEGFGRFQVSQSRGERCSAASSYMANAAKRENLHVETEATITRLNVDGGDVRGVVYVDRHGAEQYAALAAGGEAVLTAGAIGSPQLLMLSGIGAADHLRDVGVRPVVDLPAVGRNLQDQPAAVVSYQIDRPVSVTDDIRLGGWPNPMSFLRWYLFRSGPLTSPGCDHGGFFSTTGRTALPDLQIRFIAAQASSPDGVSTYKNFGRGWGGATFRSGFSFQPICVRPKSRGKLELTGGTIHDXXXXKPAITTGYLAEDSDARTVVEGIKLSREIARQGPLAGYVEDEVFPGAGVEKDDDLAKRVLVLEAGPDETGHPHIRIPAGILRLFKSRFDWDYNSRGEAGLKAGKSVYLCRGKVLGGSSCANVMLYNRGAAEDYEGWGL
>c191
GATGWGWKDLLPYFKKSETFTPPSAEYAAERNITWDNSVHGFGGPVQASHAPYDYPGSGKSWNAALSIGIQPAHEPNNGHAQGIFRLLRSVDPKTQTRSSARVNRYDRDAARPNYHILSSTAVSRILFEGTTAIGVEYVGITNGTTSSVRARKEVIVAAGSVHTPQILQLSGIGDANHLKKLGIDVVSDLPGVGQNLQDHLVLKVNYNCTNNLFPNSGSLQTNATYALQQRALYDSGLPSAYDLTGTTGNLIIQLPLSNWTSSSRSIISTTHSLLTSPQPHANKTLHPTVLHSLTKQHALLLSTINSTTIGGLSWSTGPETSIYMTRPFSRGSILIKSTSILTPPLIDYGALTHPADLAMLRAIYTANRALMASPDLAVLEPVEIAPAPGVDVHDTETLEKRLKGAVAPSNAHQCCTAAMMAREDGGVVDAWGSVYGVGRVRVVDASTWPVVVGGGPQASVYAGAEK
>c192
GAVQTPLLFQKNKIGNSSAQVGRNFACHPSLAVFGEHDEDIYGWIGATLTAQAGDFENPLKGGYLLEAGIVGPVITSSWIDGGIGRDFVEFMENSKKFQAAVTLIHDHNVGRVYLDGGRKRIEYDLDDRDFESMREALRGTARIYFGAGARRVFLPTTRRTTIESADQIDSVINSLTNGKHLYRMTSYHPQGTMRMGADPSRSVVAPDGRCHDLDNVYVPDASLFPSSLLVNPQVTVYTMASYIADRISARG
>c193
GDKSWGFWARSNDFKRGITYTKADARRNDVVPIPDDSASFAPAGGALKVSYPREPAKFSFSMAESMVELGYPRSPSFNKGTLDGVQFAATTIDPANNGIRSTSRDFYAAVSGRANLKVYTRQAAMQVVFDKSTSPLRAIGVRTVDGSLGAATIYAKKEVILSAGAFQSPQLLMVSGIGPSDQLSKFNIPVTYLNEAVGKNMQDHIFAGPTYPVSVSTLTKLATNNLLILSEVLNMRLTGNGPLTNNVADMLAWDHLELEHIESDRSGGAGYVPERPSTH
>c194
GDSFDFIIVGGGTAGCVLANRLSADPDNRVLLIEAGPRPRSPWIGLPAGFYKLLTNPRFNWRFHATPEPATCNREIAIPRGKGLGGSTLINGMIYVRGQRQDYDSWAQMGCTGWGFDDVEPVFRRLENYAGPDPDGLRGHDGPLDICEVQERPAIGEAFLNAAETSGHARVTDYNGAAQDGVGYYQVNQRNGRRASAHAAYLAPVEHRRNLSVRTGLRVTGVEVTDGRARAVRATRAGETLRLTARREVILCAGSIQTPQLLELSGIGDPARLQALGITPVQALSGVGENYSDHFCTRLNWRVRQPLTLNEFTRGPRLLREVLRYGFARRGVLTYGTGLAHGFIRTRAGLVGPDVQFFFMHASYANAAERKLERAPGMTLGVTQLRPESRGSIHARTPRIEDQPDIRPNFLATEEDRRTMVAGMIEGRRIMEQAPMDDWRAHEMSPGPDCTTQAEWLDFARRNGQTIYHAAGTCRMGQGPDAVVDPALRVRGIEGLRVVDASVMPSQVSGNSQAAVFMIAEKGADLI
>c195
GDSGQRRAVQVLTGYMTEDSIHFGLLFISPKSRGIMDIQSKDTLKMMKIDHHFLEDPEDLQEIKETFCSYVLKTSGALHKIDPDYGLLLPDEESIFDDNRLEAHIRSTVSSFHDQCSLIMGGEKDGRVVNGIGEVYGVKNLMVADASIIPYHMDGNTSGPVLFNRLRSGRGMNEILTKHILWRIKIYLNQPCTLDFISFTGLIL
>c196
GDSLYHSKGGEFAVDEVRYQNPLSKKFLQACGELGFPANDDFNNWSRSQEGYGRYEVTERDGSRCSTATAFLDPVKRRNNLHILTETMVHKLIFNDNKKVIGVEIDHDGEKKVVGLSSNGEVLLAGGAINSPQLLMLSGIGPKEHLQEHHIPIVVDRPGVGSNLQDHPAAVVSYACKPEYDGISVTSKIRIKGTKFSNPKVLLQWLMKRSGPLTSTGCDHGGFFKSNSQVEDPDIQLRFLSAQALSADGMSTFTEYKNSAGHPDGFSLQSIACRAHSRGYVRLSSSHPCSKPIIEGCHLSDERDVYTLREGIKLSRKLAEAPALAQYKAEEVYPGKHICSDDEIDDYIRNTVHTSNALVGTCRMGREDDPNAVVDGELKVIGVSGLRVIDASIMPKIPGGQTSAPTIMIAEKAADLL
>c197
GEATEFGCVGWGSNDVLPLFKRTEDDLTGCAETNPEYHAMGGEWSVEHVRYQNPLSRLFLKACMQAGLPMNDDFNDWNKSQEGAGRFPVSSRRGVRVHAANALLAPALADKTRKLTVLTGAFVRKILLEKQAVQGVQFSADGIVHTARLAPGGEVLLTGGAVHSPHLLMLSGIGPKEELERHGIDVLHNLPGVGENLQDQPAAVVSFECPRTQRGISVTSRIRIPHTTLPHPGPALEWLFQKTGPLCSTGCDHGGFFRTRAAPQDCPSPDLQMRFLAARAVTADGMGSFTKFRDITDHPDGFSFQSIAVRPKSRGKVALASADPEAKPIIMTNYLTDPQDFATIREGIRLGRRLAEQPSFAEVLGPEVFPGTHVQSDMELDAYISDSMHTANALVGTCRMGPLDGAMSVVDPNMRVIGTMNLRICDASVMPKLPGGQSGACTIMIAERAAEIL
>c198
GEAWTAIVGAVSENAQAVLERLGYSRGPDFADFARKSLGAVRNRLNSAGFEVIAGLMMPFRRRNLAGLLEDDYSGSANLRVYVNAVVTSWRCGRGSSRNGRVVSVTARTRNGNEIVVEGSRFVIAAGAIESTRILLEMNEAAPQPMLRSASSVGFCLADHLSAPIAELSLADRSDAVKLFSPRFSGTWVRGFRFIETDPPANAPRAFAHFVFAGLGKGFDLVKELLGALQRRQRPHVALATLPGSAGELIRLAWTRATKSALYVPTDADVRLHVDVEQEPVRSNRVRLSSERDAYGRRRISIAWKVSDSDLARLSETARRIVARWPARKNGLPGITPIAVEASGVAPHDAYHPVGTCRMGVDSEAVVDPDLRVWGMDNLWVTSTAVLPSAGTANPTFTLLCLTHRLANHLGTSC
>c199
GEGGKHVSLKSDGEVLLTGGAINSPQILMLSGIGPKQHLQEHGIEVVKDLPGVGQNLQDHPAAIISYKCKEGNEGVSVTSKIRIKGTTMTNPKVILQWLLRKSGPLTSTGCDHGGFFRTDSSQQSPDLQMRFISAQSLTADGMGTYTKFRESAKLTDGFSVQSIAARPRSAGSIELKSSDPKDKPLIRTGYLTDENKQDIKTLREGIKMARKIVSTQPFDQFRGEEVFPGPAVQSDVDIENYIRESVHTSNAVVGTCKMSHDADDMGVVTPQLRVRGVKNLRVIDASVMPKIPGGQTGAPTVMIAEKAADFMLSGR
>c200
GEKEDYTKIIIGAGSAGCVLANRLTENPNNKVLLIEAGPKDTILGSKWLQWKIHMPAALTYNLCDDKYNWYYHTVPQKNVNNRVMYWPRGRVWGGSSSLNAMVYIRGHAEDYNRWEREGASGWSYEDCLPYFKKAQTHSDGGDDYRGDDGPLHVTRYKGLGELDQAWLKAGQQAGYPLTKDMNGFQQEGVGLMDATVYKGERWSAASAYLRPALQRQNLATVNGVLVTRILFDGKKAIGVEVVEKGQTKQYMADEIILSGGAINSPQLLMLSGIGPKHHLEQVGVKMIHDLPGVGQNLQDHLEVYLVQGCKKPVSLLRDQKGLRMIQVGVQWFLNRTGSASSTHLETGGFIRSGPGVPHPDIQFHFFPAQVIDHGRVPPKIEAYQVHVGPMRATSRGWVKLQSKDPKQHPIIQPNYLDTEQDRYEMRQCVRLAREIFAQEGFDNYRGEEIAPGAEVQTDEEIDEFVRRKSDTDYHPSCTCKMGDSNDEMAVVDHQCRVFGLENLRIVDASIMPSIASGNLNAPTIMMAEKAADMIKG
>c201
GERCSGATAFLRKAMRRKNLTVKTGVMVRNIKFDGSKTASGVTYDLMGDDTGEVFDVPLKSGGEVIVCSGAIASPQLLMCSGIGPAEHLESHGIPVVSDCPGVGENLQDHPAAVVSFKTPKRGVSVTSKLRLLGMTNPFPILRWGLFKTGLLTSTGCDHGAFVKTSASDDQPDLQIRFLAAKALTPDGMTTFTRFRNTRNLEDGYSFQSVAARAKSCGRVRLASSNMHTKPIIDGGYLSNPADLATLREGIKLGRKLGQHNSWAGYKGEEVYPGKHVQSDDEIDDYIRNTLHTANALTGTCKMGTENDAVVGPDLRVKGVNGVRVVDSSVIPQIPGGQTGTPTVMIAERAAAFM
>c202
GESFDYIIAGGGLAGCVLAERLSQDEGKRVLMLEAGSKDYKNKFIKIPAGILRLFKSKFDWQHETTGEKACNGRNIFLARGKVLGGSSCTNVLLHHRGSKADYDNWKVDGWDDVLPAFLSTQDDTTGRDSKFHGTGGEWTMSEVRYQNPLSKKFLEVASGELGSNDDFNNWDRPQEGAGRFQVSERNGCRESGATAFLEKALERKNLVVRTGAHVRQINFDESQAASGVTYNLVGDDSDMSFSPVLAEGGEVILTGGAIASPQILMASGVGPKSHLEEMGIPVVANVAGVGENLQDHPAAVVSYESPVEGVSVTSKLRIKGTKLNNPLPILKWFAKGKGELTSVGCDHGAFVKTESSKSDQPNLQVRFLPAKALGPDGMTTFTQFRNAKNHADGFSFQSVAVRAKSKGRVRLASSNTQVKPSIDGKYLSDPEDIVTLREGIKLGRKLAAEFGEYLGDEVYPGPEVQSDDEIDEYIRGSVHTANALVGTCKMGDDSMSVVDADLKVKGVKGVRVADSSIFPSIVGGQTGTPTVMVAERAADLI
>c203
GESQYHGVGGPMTVDDVPYINPLSTAFLKAAGELGFRRSDDFNDWSSPQDGFGRFKVTQRKGERCSAANGYLEGTERRENLCVRTGAHATRVLLEGGEEDLCACGVEYIGDDGNPVCAHLAAGGEVLMCAGAVQSPQLLMLSGIGPREHLEEMGIQVRKDISGVGVGLQDHPAVVVSYKSKKAVSVTDDIRLMGTGMTNPVTLLRWLLWRTGALTSVACEFGGFFRTSEDLDQPDCQVRFVAAKATSPDGIKTQILACRPRSAGRVLLKSADPLSKPAIEGLHISDREDIVTLREGIKLGRKFCTASSFDDYRGEEVYPGAAVKSDADIDAYIKSTVHSGNALTGSCRMGREDDSGAVLDSQLRVRGVGSL
>c204
GEVFDFVVAGAGWAGCVVANRLSENSKWKVLLVEAGGDPPFESEVPVMLEAHQHTEYDWRFYAESNTSCKALSDGKCFWPRGKCLGGTSSINAMLYVRGNVRDFDRWAEMGNNGWDYDSVLPFFKKCENNHFSQFVYKDNGRYHSDAGPLNIDFYGDNPVAKTFIDAGIEDGYKFISNINADEYIGYTKVQGTCYQGRRQSSAKVFLATAKNRTNLHVLKYGLVQKVLLNETNGAYGIEYVRNGKIIKAYAKKEVILSAGVIMSPVVLMLSGIGPKEDLEKHNIAPKCDLPVGKNLLDHVHVDPPTATDNIYNFAIHGTGGLTNFGVGTLSAFINTDKAEKFPNIQLAYFWFTENAPNLPTYIKGRPLSDEIAKKLMEVNQNHDIGVVAISLLHPNSTGSIQLNSSSIHDKTNIYPNYFNVPSDLKTMISAIRHQIFYTNSQSYSAKHGEVIMFPLKECSGIEYDSDEYWKCYITYMAATEYHHVGTCKMGTQSDRDSVVDERLRVHSVYGLRVCDASIMPIQVSRHTNAPAMMIGEKGADFIKNDYL
>c205
GFLKAGIELGYPVVDYNAYNQSVGFSYIQSTMKNGIRMSTNRAYLYPANNRKNLFVTKLSHVDRILINPETKRAYGVEFTKFGKKIRAMARKEIILSAGVVGSAQLLMLSGIGPSKHLKEMKIDVVQDAPVGENLMDHIAYGGLVFLLDQPIGILTKDMVNFAKPYLSDYLIRKTGPFTIPGGCEALAFIDVDKPTKLDVYPNIELLFIGASIVSDSVIHXDEHEQSLSVSREQQEEPLSHVDRILINPETKRAYGVEFTKLGKKIRAIARKEIILSAGAVGSAQLLMLSGIGPSKHLKEMKIDVVQDAPVGENLMDHIAYGGLVFLVDQPVGIVTEDMVNFAKPYLTDYLIRKTGPFTIPGGCEALAFIDVDKPTKLDVFPNIELLFIGASIVSDSVIHKNMGISNKYWNQMYSNISGHYSWTIFPMLMRPKSRGKILLRSNDPNEKPKIFAGYLQDPEDVRIMVKGIRSALEVSRTRAMRKFKSQFHEVPVPGCEHRQYDSDEYWECALRTFTITIYHQSGTCKMAPDNDPTGVVNPRLQVKGIQGLRVADASIMPMIVTGHTNIPVIMIGEKLADIVKEDWGYKVEV
>c206
GGGGTAVIEAGPDPSEDFRVNTPAMWPSLGGSDKHLNGREVKHPQGRALGGSSAINAEAWIPPSAAVVDAWEQMGNPSWNWLTLAPYYRKSHTLVLLDAWTSTHLAWNDTFKTLNHEITGDPFSGQSTGGYSNPSSVDPASKTRSYSVSGYLKPVRKRGSLKAMTGTPAQRIVFEAAGENHTARGVEVLQDGKPIIITAKKEVILAAGCFRSPKLLELSGIGSSQLLGSLNVPLLVDNPNVGENLQDHLMTGISFEVKEGIEAKDPLIRQEPDAIQTALKMYAEEKKGQLCLAGIGSHGFMPLLDSESGDGKQEQDELIDQYISEGDDPVFKEHVRELAWQSSTTRELCDSWRHPNTPNVPWLGAPCFQRRLGPPKIGSNYLPHPLDLEVYARHILFLQTLAKTEPSASYLKPDGKRNYPTAFLKNLDDAKEYARPTSVPGYHYSGMCAILPRDKGGVVNERFLVHGTKNLRVVDASIMPLI
>c207
GGGLRVVMLEEGPPRSRFRPSFAHTAKYHMQEGASMLVQGSVPFPVMAGRGVGGGSLVNSAICFRTPENVLESWAESLDDDRYLAQNLAPIYDEIEARIGVAPVSEATAGENNMVIARGAQKLGLEGGLVRRNAPGCIGCGICNYGCPVGGKGSVDQNLILDAEDAGLRLQADCRAEALLVDGRRAVGVVGRLHHPDTKAPGAVVRVRAKLVVLAAGAIGTPRLLWQDGIARDLGPVGEQLLLHPGSGILGVCDHEVHMWKGVTQGAYVWDPQLPEALPHTITAPPEALVIQSGRVGLEAKQVMREVNHLCGLGMMVSDRGVGSVRASRSGRAKLRYEWVPEDVDVLKQGLVLSARVLLAGGAREVFVTAFGAGRHRSAEGVAAELDDLPLHAFQLYSAHPMSTCPMGLDPETSVLNPAGRAHRMDGLYIADAGVFPSSLGVNPQLTTMALATLIGRGILQERG
>c208
GGGSAGAVLANRLSENPHWRILLLEAGPDESEASDVPVLANNLQLGKFDWAYKTEPQPGRACIGHIGGQCNWPRGKVLGGSSVLNYMLYVRGNKGDYDEWRDFGNPGWGYEDVLPYFRKSEDNRNPYLARDRRHHGTGGYLTVQEPPWRTPIAVAFVEAGVEMGYENRDCNGARQTGFMLPQATVRRASRCSTAKAFLRPARNRKNLDIVTEAHVMKVLIEKNTKQAYGVKFSRRGKMYKVLAGREVILSAGALNSPQLLMLSGLGPRHQLTSLGIPVLVDLGGVGRNLQDHYGSMGLVGFSEEPITIKEERFMNIQSMLEYAAKGQGPLSALGGVEGLAWINTKFANKSVDRPDLEIMFVSGSSASDSGTVKRVQSLTNETFYKMYAPLRDKDSFSFLLMVTRPTSRGYVELRSRNPFDKPLFEAGYFNHPHDIKVIREGMKFCIALTKTKAFRKYGAKIWEGRKIPGCEHLKLWSDEYLECLARHYTNTIYHHSGSVKMGPASDPGAVVDSRLRVYGVGGLRVVDASIMPTIVSGNTNAPTIMIAEK
>c209
GGGSAGAVLANRLSENPRWRILLLEAGPDESEASDVPILANNLQLGKLDWQYKTEPQPGRACIGHVGGRCNWPRGKVLGGSSVLNYMLYVRGNKGDYDEWRDLGNPGWSYEEVLPYFRKSEDNRNPYLARDRRHHGTGGYLTVQEPPWRTPIAVAFVEGGVEMGYDNRDCNGRQQTGFMLPQATIRRGSRCSTAKAFLRAARKRKNLDIVIGAHVMKILIDRDTKRAYGVKYWRRGRVSRVFVNNEVIISAGALNSPQLLMLSGLGPKHHLQSLGVPVLVDLAGVGRNLQDHYGSMGLVGVADEPITIKEERFMNVQSMLQYAAHANGPLTSLGGVEGLAWINTKFANKSVDRPDLEIMFVSGSSASDSGTVRRVQSLTNTTYYNMYAPLESRDSFSFLLMVTRPTSRGWIELRSRNPFDKPIFEAGYFNHPHDIKVIREGMKFCIALTKTKAFRKYGARIYEERKIPGCEHLHLWSDEYLECLARHYTNTIYHHSGSVKMGPSSDPGAVVDARLRVYGVEGLRVVDASIMPTVVSGNTNAPTIMIGEK
>c210
GGGSAGAVVANRLTENPDWRVLLLEAGEDESEASDQVEPQPGRACLGHTGGRCNWPRGKVLGGSSVLNYMLYVRGNRGDYQEWENLGNPGWGWEDVLPYFRKSEDNRNPYLAADRRHHGTGGLLTVQEPPWRTPLSLAFVEAGVEMGYENRDCNGARQTGFMLPQGTIRRASRCSTAKAFLRPIRLRGNLHVALRAHVMKVLVDQTTKRAYGVKFWRGGAVHAVTARKEVILSAGALNTPQLLMLSGLGPAPQLARLGIPVLSHLPGVGSNLQDHYGTMSMVGTTEGQVSIVEERFLNIPSMLQYAAGATGPLSSLGGVEGLAWVNTKFANRSQDRPDYAPLLGRDTFSFLLMVTRPKSRGSIRLRSRNPFHKPIFEAGYFEHPHDIKVIVEGMKFCLAMTKTRAFKKMPGCAHLPLWSDPYLECLARHYTNTIYHHSGSARYALQCRGCKLVTFSCISLPFETDCRMGSRGDPGAVVDPRLRVYGVTGLRVVDASVMPTVPSGNTNAPTIMVGEKA
>c211
GGGTAGCALARRLSDSGKHSVLVFEAGNIPHPELDVPALASTFLSDPNYTKTYYSVRQRNADLENGGVTTYRAGRTLGGSSSVNAIHFNRGNAARYDEWAEITGDSSWRYENLLKYFKRSENYTGVFPSDQHGRDGPITVSLPKYIPLLNEWLGAGQFLGYPISDPNGPQRISFCPAEYSKRFGRRVSSYTGYLKPVLGLRRNLKVMLNSVVNKIIFNGNQAIGVQLQRSSTSRFSTRNDVVFARKEIIISAGAIESPALLMRSGIGPKGMLENAKIRPVKYLNVGLNLQDHVGVRLDFVINKTSAAFIKERDLNPETLRYYNAVGDGPYSSYGGYSGQAFISTTSQGNLTNNANVHLLYLASPGDPNLYAPRPNIQTAENEVATSAYVVVVNPLSRGSVRLNLTDIDGSPIIDLQYLTHPEDMRVAIDVSKARSPISSNQFPDCEPFPFGLALIGNAMRNTLQVFGIRGLRVVDASIMPLVANSNLQATVYAIAEKASDMILQEWES
>c212
GGGTAGCILANRLSEDDDVSVLILGRGRPSFSWSSCASLLSAKFQSDSERSLKFTSLPQTQVGNRSIEIAVGNTLGGTSRINDMLYTRGILAQFNAWAAQERKGWSYDDIFPYFFKPECALDETRSNVVHNTTRYIIY
>c213
GGLQTPRLLLASRSRFAEGLGNRHDVVGRYFMDHSLVPSGNFYPDDPRLLDRLHLYDMRLVEGTSVLAGLSLADPLMREHGLHNLSATLFPMPELKDVAAIEALKGLMIDLKARRWPEQAARKLWSAARGGRHLAEMMYHKIVHKAPLMPGFGQGGWSRLKNNHKRYRRLELLAFVEQAPLPENRVTLIDETDALGMPKIRLHYRWPEADLDRLQKAQRLMVETLASAGLGRYEPATPDGRPAIGSLGLHHLMGTTRMHDDPRRGVVNRHCQVHGVENLHIASSSVFTTGGYANPTLTILALSLRLSDRLRKRLNSE
>c214
GGSGGNDMIVIAGNLVSLGGGDTSKGRLVVSVYQAFSQGTVRIVATDPRRDPAIEERMLSDERDLVRMRDGVRRLRELGRHESVRAITTRVEYGSTGRSIEEELTPREVDDWMFDECSDAQHASGTCRMAAPDDRTSVVDPDCRVVGVSGLRVIDASVMPEVVRANTHLTTVMIAE
>c215
GGSSSLNVLLYHRGNAEDYNKWKDSFGLQGWAASDVLPFFKRSQDDHTGLSKSNPEHHSTGGEWSVDHVRWQSKLSKCFLEACAEAGYPLNSDFNNWDVPQEGAGRFTVSQRNGSRCSAASALLVPALKDVTRHLKVLCGAMARRIVFKDGREAAGVEFSVGNVVHIARLAPNGEVLMAGGAIQSPQLLMLSGIGPSGHLAEHGISEVANLPGVGSNLQDHPAANLAYECPLSQKGISPTSSCIFIWGKKFPNPWWILQWLVFKTGPLTSPGCDHGGFFSTPDLQVRFLPARAVTADGMNSFVTFRKTNSIPDGFSFQSIAVRPQSRGRIRLASSSPLDKPVIEGNYLADKRDIATIREGLRLSRRLAQQPAFAEFLGPEKFPGPDVQTDEQLDAYIADTVHTANAVVGTCRMGRCEDPMAVCDAELRVMSTKGLRVCDASVMPTLPGAQPGAATVMIAERAAEMI
>c216
GGTAGCVVAGRLAAADPHLEILVVEGGQNNFNNPRIVNPGVALYNIVPGSKTALFWQGEKSDHLAGRAPIVQSGKVLGGGSSINYMMYTRAQACDFDSWKTPGWSAKEMLPYLKKLENYHGRGNPDLHGFDGPVHISDGGYREKRSEEDFITAAAKVGYPDIVDLQD
>c217
GGTSGCVIAGRLAEDLEAKILVLEAGPDNADLENVHMAGGWSKNFDSETDWNIVTEPMETVDNRQVKVSRGRFLGGSSGVNGTLCIRGTKQDFDDWGMDEWTGEKMFEYMKKSETFHEKDWHAADKSVHGNEGPLHIAPHDLAPISERVKESLIDQGLPYQPDMFSTGESPHGCGDVPRTVHQGIRTTAADFVTKGYKRDNITIKTEVTVDKLLFTENSDELSATGVATISKAGKKVEYRARKEVIVTAGAYCSPPILMRSGLGPKEQLEKLGIECRVDLPGVGKNLMDHQLCFIFYEVSEPNLTNDYLAYHDDAIASTYKLYQEKKSGILSTFPFGIFGYARLDERLKDSELWQNAARKEGRDPMGLTPSQPNIEFWNTELYGGPKQYADFPVDHKHAFALCTLLFNQHSRGSVTLKSADPLENPIVDHNYLNNPLDMLVMTEACRFANEIVMKGKGTKDIIKGSWPADLTHHTYTKREDWEPHVKQHATTCYHASGTCKMGQAGDKDAVLDSQLRVRGVRNLRVADVSSVPLVNNGHTQMVAYGIGEGAAEMI
>c218
GGTSGCVLAARLAEDPSITILLLEAGRDSKDNTPDDWNFTAEPAPGLNNRFVALTRGRFLGGSSNINGGVCVRGTKADYDAWDMPGWSGDEVFAYMAKSETFHGKHWFDADVASHGRDGPLHTEPHDAAPISNLMMEAFKETAGLEFEADMFSKGERAEGCGWTTRSVWRGLRSCAADFVADRARWKNLEIVVDATVDRVVFENANGVPRARTVEVVGKDGQKRSYRARKDIAIAGGTYCSPAILLRSGVGPKAELASLGIDAILDLPGVGKNLQDHTMVGQNYEVADPSLTRCRDIYSQGAMEKALEVWQETKGGVLAGFPLGAFAFARMDKRLADSPLWRKPTLTTRDPMGQTLKQPTVEFYQTESYVLAGPEHMSDFPKDGEAAIAMFTILFGQQSTGEVTLRSKDPMESPRVDHKYFDDPLDVLVLAEGARYANEIATKSSATSKVIKGSWPKGASHASMQTREEWVGYVKANAFTGYHPAGTCKMGRSSDLKAVVDDRLRVHGIDGLRVVDCSIMPILHNGHTQMPAYAIGEKGADLI
>c219
GGTTGCVVAARLAENSSFKILLLEAGRDSKDVATVKMSGAWSQNFGGEDDWNIWSKPGAGINNRSIQCSRGRFLGGSSNVNGTLCIRGPKRDYDDWGLEGWSGEEMYKYMAKSETFHGKEWFEHSTVEGMHGYEGPLHVEPHDLAPISKRVMQSYQDAGLSLYQDMFTTGETSRGCGHAPRTIYEGNRSVAADFVADRARWPNLDIQFNATVDCIGFDRTSEGGGRPRARRVHVLLKDGTRKIFQASKEIIVSGGAYCSPPILQRSGIGRKADLEALGIEVVQDLPGVGENLLDHVLVGTCYEVNDTSLTRDQEIYPEGALAKAFNAYGKDRSGVLSIFPFGAFAYTRLDERLADHPLWKSPSADGRDAMGLTQEQPNIEYWNTECYGGPPNWKDFPVDGRAAFFMVTLLLNGQSAGTVKVKSKDPMVNPEVDHRYLEHPLDSVVLAEGVRFANEMVMKGSGTRDVIKGAWPENLTHHQMDEREAWVEYVRENMVTCYHPGGTCKMGKKDDAMAVVDERLRVYGVEGLRVADVSIMPKLNQGHTQMPAYGIGEKAADML
>c220
GHGGPAMVANTWLEGSYSEIYPEIGQGEDGLRKLFRQFSFPRGVPSHAAPETPGSIHEGGELGYALVHAFGAAFDNPDLVVACVVGDGEAETGPLAAALVHDNVALLTGAEVLRLDTDASGRTITQAMIRHKGQDVPVRANRFILAAGAVNSAALLLRSANGQHPNGLANGSDQVGRNFMNHNCTAMITLDPRLRN
>c221
GIESLGWKYEEVPRCQKDPSASAFGPGVRQSMQRTYIPRALEAGVRMIPNCKVREIALEEGRAVGVNAVVRDGGRSADWRIRADVIFVCCGAIQTPALLRRSGIRRNVGNNLRIHPMIKAAARFEHEVDSYDAAIPIYQVKEFWPTITLGGSVFTPGFLAMLLSENWEAHQGAMENCHQMGIYHAATRGLNRGSIRVLPGVDEGVVVRYRLNRADQRNLSIGLARLGELLFAAGAVAVYPSLRSFPVLTSAEQCRSFLQTDIPLSAMSLSTVHVFSSCPMGENPDLCATDSFGRVRGFDNLHVNDASLIPDSPGVNPQGSTMAIALRNVEHFMEDSERKRRLPRRRETRMPRADVLVTGATGWLGTVLVEKLYAEPDTADAGVRCLVSRGMDASPLTAISDRVGVAIGDLRDPESLRDFCRRAEGATLFHAAGIIHPRRTREFDQINVEGTRALLAAARDAGVKRVVVVSSNSAIGCNPRSDHLFDEHSPYDPYLGYGRSKAEMERVVTQAQARGDFEAVIVRAPWFYGPHQPARQTQFFHMIRQGRFPILGDGSQRRSMAYVDNLCQGLLLAAKLEAAAGETYWIADERAYSINEIVDTVEDVLENEFGIRCRRSRLRLPAIVGDLAQAADGALQALGLYDQRIHVLGEMNQTIACSIDKAKVELGYAPRFSLREGMVASVRWCLENGQHL
>c222
GKYFTEHLGVFAYGLFSERLDPWRGAPSGGLIQDSYATNARNNFARGWTIVVTNSSHWPLSVAQRVPGWGTEHKARTKQLFAHFTGVASIGEQLPDVRNHVTLDPIVKDNLGLPVPHLVNRVHANDQAMITAISVRLKELLEAAGAIEIWGNEHGPGESAHYLGTCRMGTNPSTSVVDPWCRAHDVPNLFIGDGSVLVTCGSVNPALTISALATRTAEGIGTAFRRRDL
>c223
GLGTNDDFNNWSRPQDGVGRYQVSETNGERCTGANAFLSKAIKRKNCEVRTGTMVRKISFDGSKTATGVKYDLMGDDTMKSFEAKLNEGGEVIVTSGAVASPQLLMCSGIGPADHLKDHGIPVVHDNPSVGKNLQDHPAAIVSFKTPKKGVSVTSKLRLFGVTNPFPILQWLLLKTGLLTSTGCDHGGFVRTSASARGQPDLQIRFLAAKSLGPDGMTTFTQFRHSKSHGDGYTFQSVACRAKSKGTIRLVSSNTHIKPKIDGGYLSDAADLKTLREGIKLGRQLGNRPEWGEYLGEEVYPGIDVQSDAEIDEYIKNTIHTANALTGTCKMGTGKDAVVSPDLKVIGVNGVRVADSSTIPVIPGGQTATPTVMIAERAAAFL
>c224
GLGWTGAILAMELAQEGLEIVALERGHDQNTVPDFKYPNMIDELKYGVRLKLMQRASQQTVTIRRNENEVALPYRSFGSFLPGNGVGGAGTHWNGLNWRPQPEELRLRSYVQERWGEQIIPEDMLLGDYPIHYDELEPFFDRFEHIAGISGKAGNLKGKIAEGGNPFEGWRSNDYPMPPMHTTWDGRKFADAAQGMGYHPFPSPGGIASTAYVNEYGMQMGPCNHCGFCERFGCYQYSKSSPQTAILDALKRMPNFSYRTESEVLRVEMAPDGKTATGVTYFDEATQEEVFQPADIVILASFSLNNVHLALLSGIGQPYDPATGEGVTGRNYAYQMNGGVTLFFKDEEFNPFIGTGANGMCIDDFGVNQIDFGREGFIGGSYWRAGQTNGQPIRSMPLPSGTPGWGGAWKKAIAEWYGHAMSIGSHGSHMAYRTNHLDLDPTYKDRHGRPLMRMTFNWNPNDIRMTQYMKTKMEELAKTMNPDLMQSSFKKEGAQYDVRPYQTTHNTGGHSMSENPREGVVNRYSQAWDKHNVFMTGAGNFVQNTQYNPTGLLGGLAYSTAHAIRTQYLSNPRPLI
>c225
GMIYLRGQAEDYDEWASHYGCIGWDFQSILPYFKKAENNESLSGEYHGGHGHLSVSDTRLKHPLTRAFIKAGQEFGLAYVTDFNAQSQQGVGFYQHTIKNGERGSTSRTYLASVRQSPQLTVQLNTEVD
>c226
GMRWSAASAYLRPALQRQNLTTVNGVLVTRILFNGKKATGVEVIENGQTKQYMADEIILSGGAINSPQLLMLSGVGPKKHLEQVGVKTIHDLPGVGQNLQDHLELYMVQGCKKPVSLLRDQKGLRMIQVGVQWFLNRTGSASSTHLETGGFVRSGPGVPHPDIQFHFLPSQVIDHGRVAPKIEAYQVHVGPMRATSRGWLKLQSKDPKQHPLLQPNYLDTEQDRYEMRQCVKLTREIFAQEGFDNYRGDEIAPGAEVQTDEQIDQFIRDKGDSAYHPSCTCKMGDTSDDMAVVDSQCRVIGLENLRIVDASIMPSVASGNLNAPTIMIAEKAADMIKGYSKIIIGAGSAGCVLANRLTENPNNKVLLVEAGPKDTILGTKWMQWKIHMPAALTYNLCDDKYNWYYHTVPQKNVNNRVMYWPRGRVWGGSSSLNAMVYIRGHAEDYNRWEREGAAGWNYENVLPYFKKAQTHSDGGDDYRGHDGPLNVTRYKGLGELDQAWLKAGQQAGYPFTEDMNGYQQEGVG
>c227
GPEVESDEELLEFARTQGDTSYHPVGTCRMGKDELAVVDQRLRVRGLRGLRVIDASIMPTMVSGNTNAASLMIAEKGADMVLQDYASSSVSRQELFSIVEGDPEEQQVASLLQRSEDYARSLYPAESVHMLDVAQLKAPGVSFLVAREFNSGEVLGCGAVVSIGNGEAELKRMFVADNARRRGVGVRLLKSLEHLARRNGARTLLLETGVSQPEAISLYRGAGFRDRGPFADYQEDPLSVFMEKTIDEQA
>c228
GQKIPHLVPSLPPGRSTCLLPSRTTSAAIESIGSTTAWKIHMPAALTYNLSSDRVNWFYHTEPQRHVDNRVMYWPRGKVWGGSSSLNAMVYVRGHALDFDRWESEGASGWSYAHCLPYFKKAQKHELGGDVYRGGDGPLHVSRGKSGNPLHEAFLTAGQEAGYPLTEDVNGFQQEGMGWSDMTIHKGMRWSAAQAYLHPALSRPNLETKTGVHVTRILLEGKRAVGVEYEEAGQLKQVRAEEVLLCGGAINSPQLLQLSGVGDADQLREVGVQPVHHLPGVGANLQDHLEVYLVQQCTKPVSLYSQQRGLTMVKVGLQWFLNQTGDGATTHLESXXXXGAFLRSRPEVAHPDIQIHFFPAQVIDHGRTPPKIEAFQAHVMPLRATXXXXSKGSITINSGDPKAAPKIDPNYLATEQDRWEMRQCVRLAREIFAQPAFDEFRGREETPXXXXGSDAQTDSELDAFIRSKCDTDYHPSCTCKMGSKDDPMAVVDHEGKVFGLEGLRVVDASIMXXXXPSIISGNLNAPTIMIAEKLADVIRGR
>c229
GQKTRDPVNKAAGNAASRSHLSVTDNSAECHPFGATFTSICNEAQVPSSTTPYREGEGVSSYLMTTRNGMRCSSAVAFLWPAMKRANLAVRTNASVRRIAFEAGRAVSVTFRHKGAETVVRARREIILSAGAIGTPQILQLSGVGDGASLQKLGLDVVQNQPAVGQNLQDHFGINYLFKANRPTLNDVFGNWPGRLAAGLRYVLTRRGPLSLSINQYGGLVRTRPDQTRADCQLYMNPLSYHSFHDGR
>c230
GRASPAGEQLRAVAARDVGERQYALHVLFEGERCVGVRYLHAGEITELRAERGVILATGAIDTPKLLMLSGIGPAAHLRQFGIEVRVDHAEVGANLHDHPLVGGVAFEARRAVPTSAYNHGEGMLFTTLGASGVPNVLLMAVTVPFVIPSVGAAPQNCFTIVPCLMQPRSRGTVRLASAAAALAPVIDPRTYEETADLDTLVEAVRLARDLGRAKEMSDWVAREVYPGPGTDDASALRDFVKRGTSPFYHPVGTARMGADAGAPVAPDLSVKGVTGLYVADASVMPQIVPAMTNAAVIAIAERAADLIAGRRQIPT
>c231
GRSLDWARGKGPGGSSLVHAMAHMRGCRADFDRWAEATGDTRWSWDALLPHFIATESFSGGALTDADGTVVHGSSGPLPVVLPGPELSSPLVQDYLAAWGELALVGWPLAGITVQAFGSTAAVEAEATTYLTVSLIGLPAMLLVIAATGLLRGLQDTRTPLVVAVAGFALNAGLNALLIYGAGWGIAGSAAGTVIAQWAMAAVYVVIAVRAARASGVSLRPGLDGVGGAASAGGWLFVRTASLRAALVGSVIAAASLGVTELAAFQIAMTIFTTLALILDALAIAGQAMIGHGLGASEVDRVHAVTGRLVRWGVLSGVVLGAAIAVVAPLLGPVFSPSAEVQQALTVSLWVMAAGVPLGGFVFVLDGVLI
>c232
GSGPAAMSLAREFMGTNTRVCVLESGGLEVDPQAQTLSEATTTGDPFLPPHVTRHRQLGGNANIWSIKIGSGQMGVRYAPLDDIDFEQRDWLPYSGWPFSRSHLAPFYQRAQAACQAGPFDYDAESWESETTARLPLDCDRVTTTMFQFGPRDAFASESRDALAQAKNITVYYNATAVELHANEPAQTVTRVRVATFEGGHFAVAAKIFILAKGGLENARLLLVSQQQQPSGLGNQHDLVGRFFMDHPLVDGGMFIPKSPKLIDKMALYDLRQVKQVPVMGKLTLSKALMQREQLLNVGVLMFPRASLRQSRAIVAFKTLGETIAAGERPDQIPKRLYEMLQGLDYVAIAAYLAATKKQSLFHGFGRGGWSELSHNHRRFKMFQLFYQTEQAPNPHNRLTLSSERDALGCQKLELHWRWRDLDAESIRRTHELLTAEIARSGLGELRREGSEPLQVLSPSGVAHHMGTTRMHIDPKQGVVDEQCCVHGLTNLFIAGSSVFPTGGYANPTLTIVALSLRLADHVKQVLQQALIEVR
>c233
GSINSPQILMLSGVGPSEHLQQHGIKILSDLNVGDNLQDHITLGGMIFQIDTPHSIIDTRIMNLPAMYNYYFQHGGPWTTLGGCEALAFVKTKYTNQTDDWPDIQYHFVAGTPVSDGGKQIRYNHGIRNEIWNEYYKQLEWTDTWQVIPVLLRPKSVGNIRLASTDPYAKPLIDPKYFSDIHDMKVLIEGIKIALALAETTALKDIGTKFYDKTFPGCENFTLWTDSYWECFIRHYSATLYHPVGTCKMGNASDPTAVVDAKLRVYGIKQLRVVDGSIMPKIPSGNTNAPIIMVAEKAADMI
>c234
GSSGGTVRLAAERRGEPIVIEGGTVVLAGGVYGTPLLLERSGIGAPEALRAAGVQVRVALPGVGGNLHDHSMVHADRRVGPVLQQWLDEAAATGFLPEEQTLGKFVSSVSTDGLYDTHVFPVCASDQTSFLHGRVHVEVACMTPRSRGAVHISSAAPQAHPHIDHGYLNDTANPDGSSHDLAVLRDGLVHAERLLQHPRLAQVLGERLTDMSTDSAIRDTVTHYYHPVGTCAMGDGPLAVCDADGRVHGVPGVVVADVCLMPQIPRGNTNLPAVMIGERIALTL
>c235
GSSSTNVMLYHRGTPADYEKWEAKGAKGWGPTDVLPYFRKAEDNAEGPSEYHGVDGPMPVQDVPYVNPLSRAFLAAAGQLGFRRQRQLGFRRQHDFNDWSTPQEGFGRFKVTQNNGERCSAWNAYGAAAAARPNLTVRAGCHVTKIALDKAVVATGVEYKQGGEACTAKLAKGGEVLLCASGVPVRKDIPGVGVGLQDHPTALVSYGSSQKVSITDEIRLFGSGYPNPLTTLKWLLFRRGALTTVACEFGGFFRTPRAETAQADLQVRFIAARAMNADGISTLEKFGAGARTTPGYTAQVVAIRPKSEGRVRMQSADPFDKPVLENVHLSNDEDVRTLREGIKLGRRLLQAESFDEYRTEEVYPGAKVQSDADIDAFVRSSVHSANALTSSCRMGSEKDPMAVLDAELRLRGVGALRVIDASVFPQIPGGQTCAPTIMVAEKAADLL
>c236
GTAGCVLAARLSEDPSLRVLLIEDGGSGKGVPESRIPSAFTKLWHSQYDYDLLTEPQENAAGRKIFWPRGEISDRSSINAQMAQYGAPSDFDEWARIIGDDSWSWNNFNKYFRKFEDFTPNSSYPHINASNRGKGGPVSIGYNSYTFAGSPLFVKAAMNVGIPFSGDFGLETSMKGTNMVMTYVDSHSERVSTETAYLTDKVLARPNLSVLTRHRVTKLLFERVADGTPCATGVEFVRVADGTNGKKWRVKSRKEVIVSAGAVHSPQILMLSGIGAAEHLAEHNIPLVHDLRGVGMHLTDHTVVHHRFADKKKVTFNFGEPYDVSTYANFFMAALRYQLFGTGPFASNVSEAVIFVRSDDQSLFPKAEWQSSIEDANSGPDSLDIELLIFPVLVNTDETFHIKRGAYGYMIVATNLRPTSRGTIRLKSSDPFDNPLMDPNYLATKHAVDVHVRTAHLTHKIAHTAPMTEMTDTDCQDRTFDHHIVALPNEDLEQFIRGRIQTLYHPSCTCRMAPLDEGGVVDKDLNVYGVKGLRVCDASVFPELISGHSVRPNVHYELNHTEEMLVCRPVP
>c237
GTAGCVLADRLSAGGAKRVLVLEAGPDETGHPHIRIPAGILRLFKSRFDWDYNSRGEAGLKAGKSVYLCRGKVLGGSSCANVMLYNRGAAEDYEGWGLDGWGAAECLKYFRKSEGFHKGASEFHGGDGPFKVSDVPYQNVLSKAFLDACQAMGLARNDDFNDWKRAQEGFGRFQVSQSRGERCSAASSYMANAAKRENLHVETEATITRLNVDGGDVRGVVYVDRHGAEQYAALAAGGEAVLTAGAIGSPQLLMLSGIGAPDHLRDVGVRPVVDLPAVGRNLQDQPAAVVSYQIDRPVSVTDDIRLGGWPNPMSFLRWYLFRSGPLTSPGCDHGGFFSTTGRAALPDLQIRFIAAQASSPDGVSTYKNFGRGWGGAKFRSGFSFQPICVRPKSRGKLELTGGTIHDKPAITTGYLAEDSDARTIVEGIKLSREIARQGPLAGYVEDEVFPGAGVEKDDDLLEYIKANAHSANAITGTCRMGVGRDSAVVDTSLNVFGVGNLRIADASVMPTIPGGQTAASTVMIAEKAADMILAK
>c238
GTAGFFLANRLSEIPSSKILMIEAGVKCANLVATLYRHLALHFLVLLYWNSTSTAQMGLNRRTIPYADGFTLGGSSVISELHDIFVNAHH
>c239
GTCKMGPSSDPQAVVDARLRVHGVEGLRVADASIMPNLVSGNTQAACYMIGEKAADMI
>c240
GVGPFEMTIKQGKRWNTASAYLRPALQSRPDRVSVKDSVLVHRVLFEGKRAIGIELINSNKEVEKVYANEIILSGGAINSPQLLMLSGIGDADHLKSIDIPVVHHVPGVGQNLQDHLELYIVQKSKKPVTLLSDQKFPRMIQVGIQWFLNQTGSCATTHLESGGFTRSRPGVPHPDIMWHFVPSHVIDHGRQTPSHEAYQLHAGPMRPTSRGWVKLKSKNPKDHPIIQPNYLSTEIDRWEMRESVKLSREILAQKAFDEFRDIELEPGDDVQTDEQIDAFVRAKSDSAYHPSCTCRMGSSSDNDTVVSAEGKVMGVEGLRVVDASVMPQVVSGNLNGPTIMVAERMADLIKGQ
>c241
GWFWSSERGWEIVGFHGPPQRFAARPEVIVPDKGGVDAVDVCVVGSGAGGAVVAWELCRRGIEVVLLERGRAFGRPGDFVATKPDWELEKSPLWQSAAYARIDGGKPQHLDEKLEELLPDFEDTALPSPRERRRVVEGRRGPQRIQRVFGVGGSTLVFEGQCTRYGDDTFKSHTREGVGTDWPINYADIESDYDAIERQLGVSGSPSLPGPPRRRGYPTPPHVLCGASRELEKVCRKLGLHLYTQALASPTRPWKGRPACRGCGCCMLGCGWGAKGDAESAFIRPAVATGRLRIVTAARCTRIEPGRDGRAGKVVYLDSVGKERAIKTRVVVLSAGAVETPRILFCSECGRWPRGAANGSGQVGKNYQETLFSVGYGFLEKPASYVGSPAVDNVIVDFIKGGKGSNRARGFTVSSCIAGIGALGPAGFARRLVSGWGNEHLELMKRNFGHALVLQAMGEQLPLPGNRVELSERTDCRGIPLVLVVNELGENDILMLRHMGEVIRILLEAAGADRPRLANSSYVSRMGIEPRGTCRMGDDAGDSVVDRFCRSHDMKNLYITDASVLVGGMHGNVSLTIQALARRAARHLAESLSRGDL
>c242
GYPFQVNAISSWVDRALAKMGFPEAQGFSNGNLLGRSYITHTINPYTRRRETASSSYLREALMESNNLNIFTRTLVKRVLFDDQNRATGVTVSTDGFEWKIGARKEVILSAGVMRSPQLLMVSGIGPKDHLEQLGIPVRSDLSGVGQNMQDTIILGPTVPVKVESHSQLMGNKETLPRAIREYNEQRKGLLTNPGQDYFAFEKHQPGMLKESTAADIDAAFPDDWPTFSYIALDDTFVPQYDGKNYFSMSAALMTPFSRGTVTINSNDT
>c243
HDLQMTFTPASYPEGNQAGLDTEPGFSIAAWQQRPESLGWVNVKSSDPFEKPIIQPNYLSAPEDQRVTVEGIRLSRKLMHTNALSKYLDHELYPGKGVGDSFDELLGIARERGLTCYHQMGTCKMGPSADKTAVVNNELKVYGIKNLRVVDASIMPTMLSANLNAGAMMIGEKASGIILKEK
>c244
HGIDVLSNRPVGKNLIDHMSVTLRPFQSEAKTPIAAATAFIKSDNQQTIPDIQIFHATFEKVDVAYTILLGAKSRGEIKLRSNNPTDTVIVDPKYLNDDTDKQRLAKGVREHVKIIKSMKTEKSTYTFVPFKWNENCTQYDELSDKHLECVVMYDGYRAHHMVGTAQMGKSDAKSSVVDPTLKAIGATGVRVVDASVMPTIVSANTQCAVMAIAEKAADLIKKEATTQE
>c245
HHGSGGTWGTDHVRYQNVLSRTFLAACGKLGIGPNDDFNDWSKPQTGAGRFLVSERNGARCCAATAYLAPALGRSNLTVLSGVYARKLSISNNACTGVQFCIDSSATFEARTASDGEVVCAGGAMQTPQMLMLSGIGPKAHLKEHGIPLVADLPAVGENLQDQPAGVVSYAVKPQFKGISSSSEARMPGTVYPNPRSVLKWLCARRGVLTSTGCDHGAFISLANETSPRLQLRFLATRAVTADGMGSFTTFRKTPNHPDGFSIQSIAARPLCRGRVMLKSASPEDRPILDYDWLNDEDRATLREGMRLARRIAKTASFDQYRAEEVFPGEAIQSDAELNEYLDQSVHSANALVGTCRMGPDARDTVVDSRLRVHGVARLRIADASVFPQLPGGQSGA
>c246
HHYVYNQAHNPNLQLWAGKRVNRVIFEGKRAVGVEFTSDPVSCPDMDQSLSTVRASKLVVISAGAFGSPTILERSGIGAEWILKQCGIEQVVNLPGVGESYRGLSDHNAAGYPYFIADGVVTMDSLWRGDESVIQESLAQWESNGGTLIAEKLVQVTALVIGSDAKIKWRPDDDELTAMDSAFQPRWKEFFQDRPEKAVAIFALKAGYVGPLSSVLPPRNYMGAACMTLYPASTGSVHIKFGEDGKEEIDFTTGFLDE
>c247
HMMLGPKTVTRGATKGAAPRSMAARRVGGARRLGSVRAAAGPAGSEKFDYVLVGGGTASCVLANKLSADGNKKVLVLEAGPTGDAMEVAVPAGITRLFAHPVMDWGMSSLTQKQLVAREIYLARGRMLGGSSGSNATLYHRGSAADYDAWGLEGWSSKDVLDWFVKAECYADGPKPYHGTGGSMNTEQPRYENVLHDEFFKAAAATGLPANPDFNDWSHPQDGFGEFQVSQKKGQRADTYRTYLKPAMARGNLKVVIGARATKVNIEKGSSGARTTGVEYAMQQFGDRFTAELAPGGEVLMCSGAVHTPHLLMLSGVGPAATLKEHGIDVVSDLSGVGQNLQDHPAAVLAARAKPEFEKLSVTSEVYDDKCNIKLGAVAQYLFQRRGPLATTGCDHGAFVRTSSSLSQPDLQMRFVPGCALDPDGVKSYIVFGELKKQGRAWPGGITLQLLAIRAKSKGSIGLKAADPFINPAININYFSDPADLATLVNAVKMARKIAAQEPLKKYLQEETFPGERASSDKDLEEYIRRTVHSGNALVGTAAMGASPAAGAVVSSADLKVFGVEGLRVVDASVLPRIPGGQTGAATVMVAERAAALLRGQATIAPSRQPVAV
>c248
HSPQLLMLSGVGAAEDLAEMDIPVVADLPGVGQNLQDHPACVATYDINDNIAVTDQIYDSQGAIRPSVVAQYLLFRRGPLTSTGCDRGLFTRSSPSAKQPDLQIRFVPARALHPDGVSAYSIFGRLKELGLAWPSGFSFQIIACRPHSRGRVSLRTPSPYDAPSIDAGFLSDKRDLETLKVGLRKSRELASTAAFKSLIKAEVYPGQEEDEKYIRRTLHSANAVVGTCRMXXXXGRNATDGSVVDAQLRVHGLSGLRVIDASVMPGIIGGQTGAPAVMIAERAAHMLTWFVRAETNSRGPSKYHGAEGAMSVEDPRYENGLVPLFFEAARQAGYNSNADFNNWDREQDGYGTFQVAMRRGERGDTARMYLKDARGRPNLSVVTGAAATRIAFEGKRAVGVEFVLPEADARNRMDANLATGAQ
>c249
IAAQAWDYIIVGGGTAGCVLANRLSAKTRKRVLVLEAGSGDYNATRIRIPAGVLDLFQSKCDWNFRTSSEPVATSNDGIYLCRGKVLGGSSSVSVMLYNRGSANDYNTWRDEFGLDGWGAEDVLPYFRRTENAHIELGANPDYHGFGGEWSVSNVRYQNPLSKSFLDACNEAGLPANPDFNDWSRTQEGAGRFAVSQLNGARASSASAFLAPALADERTGRHLRVACGIQVNRIVVEGGAASGVEFMLANGDVSERFTAHLHPAGEVLLASGAIHSPQLLMLSGIGPKEHLKAHGIPLVRDMPGVGENLQDHPAANVSYECPASAQGVSPTSSCMFILGKKIPHPLWILRWFISGSGPLTSPGCDHGGFFKTAASALGKAMHEEQLQLEPDLQMRFLPARAVTADGMNSFATFRSIRSLPDGFSFQSIAARPHSRGRVRLASASVRQKPLVEGCYLQDHRDMATLREGLRLSRRLARQPAFSSWLGPEVFPGSEVQSDEQLDTYIAAGVHTANALVGTCRMGRADDAAAVCNGAMQVLGIAGLRVCDASIVPRLPGGQTAAPTVMIAERAADLVIG
>c250
IAGERYQGEATEWRGKTGRLGVKQANYPDPLYDAFLAAGLESGQGRSDDLNGANPEGLARLDCTVMNGKRCSAATAHLKPALARENLTLLPFAETQQVILNGNKAQGVVFTNRGERITAFAEREVILCGGAINSPKLLMLSGIGPEQHLKECNITPRMHLPGVGQNLQDHAKIRLQFASKKRLPFHSINNPFNKLKAGINWMLTGGGMAGSNIWEAGGLIRSNEDVSHPNLQYHFGPLGFTMSNGKIKVEQAFSLNVDQMRPKSTGEIRLNPSDPQSSPMINFRYMHDPYDLKEMVEAVSMARDLVSQQAFDEFRGVEMKPGSQYQSVEDIEGMLRANIETAYHPSCTCRMGYD
>c251
IFAQEALAPFRGKELQPGSHVQSDKEIDAFVRAKADSAYHPSCTCKMGRSSDPTAVVDAQTKVIGVENLRVVDASIMPSVVSGNLNAPTVMIAEKAADIIKGHPHLRTRMFLSTSPRLWTPSVKTDSHCLRTTEELRPSQEIQPVQPCPRYF
>c252
IGGMSGNLEIVVSARWKVEGQGGRKRSLFSFMNLTTNFMPEDEAYDTIFGPYENDSMLFCCAQLLHPKSRGTVRLQSSDPYDPPLIDPNYFDDPSDIDNVVAGE
>c253
IGNIYFLLKVTARINSPYANPSGTDPDLQIFFAGYTAHCASSGSVGDPEDPEDPDAKKEFTFSPVVLHPKSKGYVALHSNNPFDPPKMVANYLTEPEDVRVLIAGIRVIQQIANSTIMVQKYGMQIDETEYGDCAVKNRYDSDEFWDCAVKYYTGPENHQACSCRMGPKSDPMAVVDNKLLVHGMTNLRIMDASAMPLLVSGNTHATIVMMAERGVDFIKEKWLNGGGIANRFGGESQASNQRVPAVTSPPVRQNNFYNHNKQMGLPSNFNHNEMFHKQHPNLPNPYLGYNGKYVPMYNYYQGYNSK
>c254
IGPAVELAAHGIPLVHELPGVGRNLQDHLDFILAWKSRQTDLMGIGLSGMPGLIKHMLRWRKDGTGMIATPYAEGGAFLRNQGDNKFPNLEVVQEMEQENP
>c255
IGPNWIHAQTENSHPHAISRLAEETGTPMHSWNDKQLIFDSNGSAVPADMTERLSTLLWEIIEEAFNFSADAQKGTSIIDNDASLYDFVRDQAKEKLSDENERALLLKMSEMFGAYIGEPVWRQSLKFAWMEECCGGEELFVESNYSKILAKIAQPVESRARIILNTYVDSISSSEAREPGGKVHVGTKNGDSLAFDEVVVTTPLGWLKRNQDAFTPRLPTRISSAIENISLSQLEKVFITFPSVFWNAKPELDDFPCYTNWLTPEYAEGSNPQHWPQEIWDLSTFRSPNNHPTILFYTYGDCARHILVDNLPVLSNDVHDNAVVLGLLEAAYDHNGNDALDAGDTDGNSTAVDGVGGCLLGAHGELGGKRGLVAGVLEGKEVGADAPAQNTVPLARDPSLVIGHQAATGDGLEDDLLGIRQRNGDESGLRIGDGMQASVEEPYHTLIRPPTSALSSFGVRRDRLRPMRPANLYDMLSSTLSVAVALLGIQAALGRPIQGLERAEIEEAYDFIIAGGGTAGLVVANRLTESGKHRVLVLEAGPDPSIVAAYKPLGGNQLLAGSAIDWRFDTVPQEGLDGKILTYYRGRGLGGSSAINGFYYGRGTSTVYDRWQDLGNPGWSWADVYPLFIKGTHFNPQDETKGFDNTYKTWDPSAYSDGPLEIAYQGYVPPTGIAFMHACEAANIPIVHDYNTGNSTGVKQGTATLDANLLRSSSYDGYLKKAINRTNLDVLYYAPVQRLLWDTEGEKPRATGVQFLDHPSGRMYQVHAAKEVVVSMGAFQTPQLLMVSGVGPAAELEKFGIEPVYINENVGQHLDDHSVFSIMATVADEFSTSQYADFDLLQAIQEEFYTNGTGVYTAPSGITNGFQRLPEEELRDIGAGAVVDAGLSDQSHIEYLFESIFYPGGPTPFYTPLANESYISLTASSMVALSRGNITLRGTSMSAAPNINPNYYTHDADRAIAIQAFKYLRKILAHPELAKFTYGPDNGEVSPGAAHVHTHSIMPSAIVTGATGILGREIVNRLGANSDHRGHVMASHPHTQHIHTHSTMPSAIVTGATGILGREIVNRLGANPDQWQTVYALSRSKKGAFPANAQHKSIDLTGSADDMAASLEDVQAEYVFFAAYLEQDTEQKAWDVNGAMLESFLAALERTGAARSVQRVVLVTGAKQYGVHLGPPKNPMLESDPWLRDEGRFPLNFYYRQQDVLRDFCARTASSSGGEGASWTVTYPNDVIGVAKGNFMNLATALGLYAAVNREMGRDLAFPGSETFYTRFDSFTDAKLHAEFCEWAALEPKAANEAFNVVNGDIESWQNMWPMMARRFGSKVKEDQFVGEGDDAGSKKLNDPSPLSVFEAESGLKGKVDPGNLEYRIDLVKWSQRDDVKEAWERLAEREGLDKEAFEKATWGFLVFILGRAYDLVISMSKAREIGWTGYKDTWKAFSDVFGQLEAEKHNYISMASVGGKVDRRIAINVYVVEVGTVIEQKSRDGWESSIRRHTEGRPAPPIFGVDIHAHMDQVGHLLQVAIAGSLNDGSVFDHDSLQQPTHGHTSLRLDKRPVREYHTRASLLSNMARLSIPVLLALFSATASLASKQASDSAGPGCAAPGFGAPGFGAPGFGAAGFGAAGSAACKRAVLLAEGIKLNIDDQNNEVLSLTAVSNALNANDAAAFQAAKTDLLGFVNSGIEMRKMNQAIAPAGNKAIAGLAIVADAQTEELNLSNSLSGDPAKKAADLKTVDTLKADFAGGIKQNMQNMADALSSCGGMPPPDVFNSTAFAPPPAPVFGAGANPFRGKGFWKLFRA
>c256
IGQTMARFASTWESEHYDKIVVGAGSAGCVLTNRLTEDPNCKLLLVEAGPKDTILGSKLMQWKIHMPAALTYNLCDDKYNWYYHTVPQKHANNRVMYWPRGRVWGGSSSLNAMVYVRGHALDYDRWEKQGAKGWNYEHCLPYFKKAQSHELGPSDYRGGEGPLHVSGGKSTNPLHEAWLKAGQQAGYPFSEDMNGYQQEGVAYMDSTVHQGKRFSAAVAYLHPVLSRPNLTTLNNILVTRVIFENKKAVGIELVEKGVTKRYRADEIILSGGAINSPQLLMLSGVGDADHLKQVGVDVVHHLPGVGSNLQDHIELYIAQCCTKPVTLYSEQKGLRMIKVGLQWFLNQTGPAATTHLESGGFIRSHAEVEHPDIQIHFLPSQVIDHGRKPPYLEAFQVHVGPMRATSTGWLKLKSKDPREAPLIQPNYLETEQDRWEMRQCVKLMREVFAQPAFDDYRGPELSPGSEVQTDEQIDAFVRAKCDSSYHPSCTCKMGDTSDNMAVVDNTTKIIGLENIRVIDASIMPSVVSGNLNAPTIMIAEKAADIV
>c257
IIGGGSAGCVMANRLSADSDKAVCLIEAGPRDRNPFIHMPLGVGVIARTGWVNWNCETEVEPHLNNRRLYWPRGKTLGGSSSINAMVYIRGDRADYEGWGAAAGADWDWPRMRELFIALENNQAIHDEHHGNAGPLCVSNLGRVNPLTEDFVEAGVELHYPRNPDFNGVSQEGFGVYQVTQKDGQRFSTARAFLDPARSRKNLAIETNGLVERILFKDRRAIGGRVGGRDLLLRPGGEVILSAGAVNSPQILMLSGVGPASELRQHGIEIVLDAPEVGANLADHLDYTAVATTADREGFGVAPSFLPRAIRGAWSYFLHHEGELTSNASEGGAFLKSDAGRDRPNLQFHFLPAILRDHGRKTAFGYGMTVHVCDLLPKSRGRIGLKIADPTAHPRIEGNYLSHPDDVGVLLNGAKLARKLLHAPALARHLREEVRPGPAVQTDEALIDDIRARAETIYHPVGTCRMGSDSASVVDPAARVRGIDGLRVVDASIMPSIVSGNTNAPTMAIAENVAQMMIRP
>c258
IIGVSLRYTSSRTRLWVPLPRGNHVSLSPSVSRIHLPTDIRTSLPKILSPHHRPIFPASILPMIEGIMIEATKFSRRLIETKAFSDAGDKGVAPGADVITEEDIAEYVKNCLSTSFIPSERLQCYRVPKEDGGVVDERLRVYELINLEVVDASIIPIQLVAHSQATVYAIAEKAADLIKAD
>c259
IILSAGIAGSAPILERSGIGNPDILTPLNITPIVNLSSVGTGLRDPLMMQYQPLQYNFSVEFTGGEYAQNYIDLRPAQDVLSPADYNAASVWLNETTSIPGLEDAQLLVFKHLWFTRQPLIEMAWQYSSTQSMPYTLIPLSQGTIHINTSDPLAAPVIDPNYNSVTAIINNETVPWDLWLLSRASQFYVAQLASTPPFSDVLTKTDPDHNLSPADYQQAVYERTGTSQHLTGGLPMLPRSAGGAIASDLLVYGTQNVRVVDGSIFPYQPSAHPMGLTYAVAVHAAKILQQARGTKLTYTELPGVSNSSSNATAVFPTNLPTATYDVRGSAVPAISSAMASTGGVEKVEDQYVRLVLWLSPFPKSQIMSSQ
>c260
IISSEYDYIIAGGGLAACLLAERLSVDKSKSVLVLEAGRSDYDAAIIRIPAGVLRLFRSVYDWQYESCGEKNCNGRNVFLQRGKVIGGSSCTFVCLHHRGSAKDYDNWEVPGWSAKDVLPYFKKSQHDNTGKCDPEFHGTGGEWVMDHVRYQNPLSEKFLEVGEKWGLGTNDDFNNWSRPQDGVGRFHVSQINGERCTGGLAFLSKAKGRKNLKVRSGTMAKHINFDDSKTATGVTYDLMGDDTCTTFEAKLKKGGEVLVAGGVFGSPQLLMCSGIGPAAHLKELAIRVISDLPGVGQNLQDHPSANVSFRTPKKGVSVTSKLRLFGKTNPFPVLKWLFFKRGLLTSVGCDYGAFVKTSASVDDQADLQIRFLAAKAVNPDGMTSFTEFRNTKKMEDGYTFQSVCVRARSKGCVRLASSNSHIKPIIDTAYLSEESDLATLREGIKLGRKLGNSNTWGVFKGEEVFPGPSVQTDDEIDNYIRNTLHTANALVGTCKMGSGVDAVVGPDLCVIGVNGVRVCDSSVIPKIPGGQTATPTVMIAERAANFL
>c261
IIVGAGSAGCVLANRLTEDKDTSVLLVEAGPKDTILGSKMLQWKIHMPAALTYNLCDDKYNWFYTTLPQEHVNNRKMYWPRGRVWGGSSSLNAMAYVRGHAEDYNRWEKEGADGWSYQNCLPYFKKAQTHQLGEDDYRGGSGPLHVSRGTSGNPLHDAWLKAGQQAGYPLTEDMNGYQQEGVGPMDATIHNGQRWSAAVGYLHPALKRENLSTITNQLVTRVILEGKKAVGVEMVDRKSGEAKKIRADEVILSGGAINSPQLLMLSGIGDADQLKEVDVPCLHHLPGVGANLQDHLELYMAQQCTKPITLYSDQKGLRMIKVGLQWFLNQTGSAATAHLETXXXXGGFIRTHAEVSHPDIQFHFLPSQVIDHGRQAPYLEAYQVHVGPMRPTXXXXSVGWLKLASKDPRDAPLIQPNYLSTEQDRWEMRQCIKLSREIFAQPAFDEYRGPELAPXXXXGSDVQTDSQLDEFVREKSDSAYHPSCTCKMGSTNDPMAVVDSSTRIIGLEGIRVIDASIM
>c262
IKLINIFPPPGVIAATLPGFGKENWEHAKQFANLSAFGVMISDDASGRVRKTMGIPLVTYQMKPEDKAKLVKGLVLLAELYFEAGAKRVYLPFHKMPYLDNVDDLKKIIPEDMPGKWIESGSQHPLGTCRMGKDPKTSVVNEFGECHRIENLFLADGSAIPTSVAVNPQITVMALATKVADYLKERVGKLKGLARAAS
>c263
IKVSREVLLTAGAIGSPHILQLSGIGRRELLESVGVEVIANLPAVGENLQDHIYSPRLFSVKSSILQSLYQSLYVEEVKETKPREEQTHKEEEGDENKLQKDQKKKEKKKDGEEEKETKKGEEAERQLGEGGGGREQEEEEEEAEKRASKDVEKVLKTLLETANRDRGTRFQTLMDFFLHGQGLLTTSGADAHLISGMLAPADLPSSSSPSSSPSSSSLDSYPSSCPRNVTLPDIQIHFFNALPNSASLSRLMNLPSNIHEMIGDPRHWGFSPSSSSLQGIIMLPVLLHPRSRGYVRLRSANPLEPPLINPRYLKHSRDVHVLLEGMKIVDALVTASPLYDLIDVEMLPACAHPPSQEVPSSSSSSSSASGHTDSSSSSSDLATKSRKGRVLVVGEQEREEEKRGGEGGGGEEQEERQRETREEEEEDEVKREEGLRRSLASSAEDYLEICQLTSVQEDRDLLYSHFGDKLLRYFTLTLYHPAGTCRMGKGKDRNEKEKEEEEQQMSLTMSEKSEGEKKQMTDEKEYDMNKEKQTEGRDEGVHTPESVESPVAKTPLNQREEEMEERRQKEEKERTVSEREEKDEKKKRKERDAWVWSEDSVVDSRLRVCGGVCISGVRVIDGSIMPHLPSGNTHAPILMIAEKAVDMLLQDHSLS
>c264
ILELSGIGDPEVLLKAGIDVQLSLPGVGTNVQEHLYTGVTYRKYSRLSPSILDPTKRHMSLVLALNNPFSRGSIHIRSNDFRMQPVIDPRIFEQPYDLITMVELVKFARRIAHTEPLAGLLSGTEVYPGPQVETDEQIAEWLKDTISTTYHTVGSCSMLPLEDDGVVDAKLKVYGTTNIRVVDIGIIPLHVGGHTQGTLGALRSILRSRMSCIPCWMQLWHIV
>c265
IMLFKMDGEKNRYKMIVVGTGLASTFFLMRSFKGDGSVLVIERGKRDTHSWRVANRRHMQKHGVVSSVDYESTFINLNRHKEWVYTPAFGGSSNCWWGHTPRFHPSDFKLNSLYGVGRDWPVSYDDLEKYYCEAERVMQVAGEMSDLFPRSQPFPLKPHTLNRVDQLMRKANPSMYIPLPCARPSKELPHRHRCCASGVCYLCPVDAKFTVLNELAWIYERDGIELMLESEALALDIEGGKAKGVVVRHGGEIKRIKGDIIVLGANAIFNPAILLRSGDRSPGLGEGLSEQLSIGCRVMLDGVRNFQGSTSHTAHGYMLYDGAHRKERGAVLIESSNIPLLRLEKGRYREAANFKFIIEDLPSPKNRIEVKGWEKPKLIFEGHSNYALSSLQYVKETAHRVFAPLPVERIKFSEKPLKTESHILGTTPMGVDRDNSVVDPNLVHHRYRNVLVLGGSVFPTITPSNPSLTICALSLMAADRIGGV
>c266
INSMVYMRGHPDNYDGWAEDFDLPAWRFENCLPYFRAGEASDRGADAWRGDSGPLQVTKSHHQSPLIDAFLEAGDETGQGRSDDLNGYKPEGLSRLDATIGNGQRCSAAVAHLKPARGRP
>c267
IPGLFPFVDYSYEDWNYRTVIDDYSSQAHAEKNIHLTRGKMVGGCSGSNYMYYIRGNRHDYDCWEGMGNKGWGYKSVLPYFIKSERLEDDTILKSPSGSFHGTEGYLGVTKPDWGDRVDDYFTAFKQNERKVILDQNGPEQMGYALPTFTVADNVRQSTGYAFLRPIKNRKNLFLSRKSFVRKVLFNDAKEAVAVEIVRDGETYFVGSRREIIISAGAINSPKLLMLSGIGPKEHLTEMAIPVISESPNVGKNLQDHATVPFIITENKSKVTVVQNLEIFANLDEMPAPCLMGFAAINKTQTIPDYQVKFFVFPVGTIIPVWICNFVFGLADSICVSMAKATQSKGVILVLVILLYPKSTGKVILKSNNPEEPPLIYTGYYSQDEDLENHAKYIQDFLTVLDTEYMKKTNALPLDLDVTNCEDYEFNTFEYWKSYALNTATTLWHPVGTCAMGPEGVGVIDYKLRVHGVKKLRVIDASSMPKIVGGNTNAPTIMIADKGADIIKADHGFLGDPDN
>c268
IPVRSSRSVGDNLQDHVYVPLGPLIHNDTDAGLVDPWWDYFMHGKGPYTTNGIDGMAFKASKYSQHPDWPDLRLHFLTYSCSSDHGVLLRKILALNENMWTDFYESLSHAATASLFPTLVRPKSRGWIRLRSTDPAEHPLIDPQYYSHPDDVKIMLEGKLSFAKETLDTPVLKNLLTLHKVSNPYCKDHPADSDSYLECLIMHSTQTIYHPAGTCKMGPAEDPDAVVDPQLRVYGIQGLRVADASIMPLITNGNTNAPTIMIGEKASDMI
>c269
IQAGADAGYPRTDDLNGYQQEGFGPMDRFVTPNGRRASAARGYLDMARHRERLTILTGALTDVVLFDGKRARGVRFQHQGRLKTVEAQREVMVCTGAIASPQILQRSGIGPGSWLKEAGVAEILDLPGVGSNLQDHLELYI
>c270
IRAATAADAQAAAACEWDFIIVGGGTAGCVLANRLSASGEKRVLLLEAGGAKSLSSLMFRIPAGVLGLFLSEHDWAFQSGAQKQAQNRQIYCARGKVLGGSSAINVLLYNRGDAADYDLWETKYGCAGWGAKSVLQYFVKXXXXXXXXXXPGAKSPEHHGTGGTWTTDHVRYQNVLSRTFLKACGMVGIGQNEDFNDWSKPQAGAGRFLVSERNGARCCAATAYLADALGRKNLTVLTGVYARKLLIENNTCTGVQFGMGTQPSSATFEVRTTSDGEVVCAGGAVQTPQLLMLSGVGPKAHLAEHGIPLVADLPAVGENLQDQPAGVVSYAVKPQYKGISSSSDARMPNTVYPNPRSVLKWLIARRGVLTSTGCDHGAFIPIANETSPRLQLRFLATRAVTADGMGSFTTFRKTPNHPDGFSVQAIAARPQCRGSIKLRSAAPEDRPLLDYDWLNPEDRATIREGIRLGRRIAKTAAFEQYRAEEVFPGEAVETDAQLDEYLDQSVHSANALVGTCRMGPDARKAVVDTALRVHGVARLRIADASVFPQLPGGQSGAPTVMVAERASEFL
>c271
IRIPAGLVKVFKTKHDWDFETKPDPDTADRGVYLCRGKVLGGSSSTNVMLYHRGTPADYESWVARGAVGWGPGDVLDYYKKAERASNGQSKYHGAGGPLHVQDVPYVNPLSTAFVAAAGELGYRHNSDFNDWSAPQEGFGRFKVTQRSGERCSAANAYLPDEVARRANLCVRMGTTVTRVALDGNGDAEPLAAGGIEYVDAEGRLMTARLASGGEVLVCAGAVQSPQLLMLSGIGPREHLEEVGIEVRHDSKGVGEGLQDHPAVIVSYECPQAVSLSDEIRVPGTSITNPITLAKWMLFKKGALTSVACEFGGFFKTSEQREQPDVQVRFIAARALSPDGISTLKKFGSGEVLKSGFTTQIVACRPRSEGRVRLRSADPRAKPQVEGIYLSSRDGADIATLREGIRLGRKIAAASSFDAYRGAEVYPSTAVSSDEEIDSYIRSSVHSANALTSSCRMGADGDPAAVLDPELRVRGVGALRVVDASAMPHIIGGQTCAPVIMLAEKAADMV
>c272
IRIPTGVLHLFQHPQYDWYFNTSNEKKTAGRGIYLCRGKVLGGSSCLNVLLYGRGNAHDYDLWGSEFGLTDWVASKVLPYFKRTEGDRSGLAEKDPKHHSKDGEWGVDHVRYQNVMSKCFLQACDELGLPANEDFNNWDRNQEGAGRFHVSERNGMRCSSASALLAPAQADKSRSLTVLCGASVSKILFDTRNSATGVKFTCGGTIQNARLKHGGEVIVTLGAIQSPQLLMISGIGPKAHLESHNIATISDRAGVGENLRDHPAANVSYQCPDSKRGISPTSKAFFIMGKKLPNPAWLWEWVTRKSGPLTSPGCDHGGFFRTSEATQEKNSPDLQMRFLAVRAVTADGMNSVAKFRDVQNHPDGFSFQNIAARPHSVGRVRLGSSSMADHPVVEGNYLSDPRDVATLREGLKLSRRLAKQDAFKDFVGHEVFPGPEVKTDEQLDAYISESVHTANALVGTCRMGRSDDPLAVCDSEMRVLGVHNLRVCDASVMQLPGCQTGAPTVMIAERAA
>c273
IRPATVADAKAAAECEWDFIIVGGGTAGCVLANRLSASGEKRVLLLEAGSSKSLSSLMFRIPAGVLGLFLSEHDWAFQSSGQKKAANREIYCARGKVLGGSSAINVLLYNRGNAADYDLWETHYGCAGWGAETVLPYFVKNQNDHSGLAGKNPQYHGTGGLWSTDHVRYQNVLSRTFLAACGMLGMGQNDDFNDWSKSQTGAGRFLVSQSNGARCCAATSHLAAALGRPNLTVLTGVYARKLNISNNSCTGVQFCMGNWDSTQTFDARTAADGEVVCTGGAVQTPQLLMLSGVGPKAHLAEHGIPVVVDLPAVGENLQDQPAGVVSYGTCRTSRRGLCRTG*SLPTKASLPRATPGCLARCIRTRAR**NGSLPAVGS*RRPAVTTARSSQSGMRRLRVSNSVFWRRVRSLRTAWGPSRPSGRRRIILTASASRPSRRDRGAAGASSSAPQPRRTDRSSAPEDRPILDYGWLNDEDRKTLREGLRLARRIAKTSAFDQYRAEEVFPGKAIETDAEIDEYLDQSVHSANALVGTCRMGPDAHDTVVDSALRVHGVAGLRIADASVFPQLPGGQSGAPTVMVAERASEF
>c274
IRPATVADAKAAAECEWDFIIVGGGTAGCVLANRLSASGEKRVLLLEAGSSKSLSSLMFRIPAGVLGLFLSEHDWAFQSSGQKKAANREIYCARGKVLGGSSAINVLLYNRGNAADYDLWETHYGCAGWGAETVLPYFVKNQNDHSGLAGKNPQYHGTGGLWSTDHVRYQNVLSRTFLAACGMLGMGQNDDFNDWSKSQTGAGRFLVSQSNGARCCAATSHLAAALGRPNLTVLTGVYARKLNISNNSCTGVQFCMGNWDSTQTFDARTAADGEVVCTGGAVQTPQLLMLSGVGPKAHLAEHGIPVVVDLPAVGENLQDQPAGVVSYGVKPAYKGISSSSDARMPGTVYPNPRSVMKWLLARRGVLTSTGCDHGAFVPIGNETSPSLQLRFLATRAVTADGMGSFTTFRKTPNHPDGFSIQAIAARPRCRGSIKLRSAAPEDRPILDYGWLNDEDRKTLREGLRLARRIAKTSAFDQYRAEEVFPGKAIETDAEIDEYLDQSVHSANALVGTCRMGPDAHDTVVDSALRVHGVAGLRIADASVFPQLPGGQSGAPTVMVAERASEFL
>c275
IRPATVADAKAAAECEWDFIIVGGGTAGCVLANRLSASGEKRVLLLEAGSSKSLSSLMFRIPAGVLGLFLSEHDWAFQSSGQKKAANREIYCARGKVLGGSSAINVLLYNRGNAADYDLWETHYGCAGWGAETVLPYFVKNQNDHSGLAGKNPQYHGTGGLWSTDHVRYQNVLSRTFLAACGMLGMGQNDDFNDWSKSQTGAGRFLVSQSNGARCCAATSHLAAALGRPNLTVLTGVYARKLNISNNSCTGVQFCMGNWDSTQTFDARTAADGEVVCTGGAVQTPQLLMLSGVGPKAHLAEHGIPVVVDLPAVGENLQDQPAGVVSYGVKPAYKGTKASRSVMKWLLARRGVLTSTGCDHGAFVPIGNETSPSLQLRFLATRAVTADGMGSFTTFRKTPNHPDGFSIQAIAARPRCRGSIKLRSAAPEDRPILDYGWLNDEDRKTLREGLRLARRIAKTSAFDQYRAEEVFPGKAIETDAEIDEYLDQSVHSANALVGTCRMGPDAHDTVVDSALRVHGVAGLRIADASVFPQLPGGQSGAPTVMVAERASEFL
>c276
IRRATAADAQAAAACEWDYIIVGGGTAGCILANRLSASGEKRVLLLEAGSAKSLTSLMFRIPAGVLGLFLSEHDWAFQSCAQKQASNRQIYCARGKVLGGSSSINVLLYNRGNAADYDLWETKYGCVGWAAKNVLPYFVKHQDDRSGLAAKNPDYHGVGGMWKTDHVRYQNVLSRTFLAACGMMGIGQNDDFNDWSTPQTGAGRFLVSEMNGARCDAAVTYLAAALGRPNLTVLSGVYARKLCISNNACTGVQFCIDGSATYEARTASNGEVVCTAGAMQTPHLLMLSGVGPKAQLAEHGIPLVKDLPAVGENLQDQPAGVVSYGMKPGFEGISSSSEARMPGTVYPNPRSVMKWLCARRGVLTSTGCDHGAFISLADETSPKLQLRFLATRAVTADGMGSFTTFRKTPNHPDGFSIQAIAARPKCRGRVTLRSANPDDKPILDYGWLNDDDRATLRDGMRLARQLAKTAAFDQYRAEEVFPGEAVQTDAELDEYLDQSVHSANALVGTCRMGPEGRDTVVDSALRVHGVARLRIADASVFPQLPGGQSGAPTVMVAERASEFL
>c277
IRRATAADAQAAAACEWDYIIVGGGTAGCVLANRLSASGEKRVLLLEAGSAKSLSSLMFRIPAGVLGLFLSEHDWAFQSCAQKQAQNRQIYCARGKVLGGSSAINVLLYNRGNAADYDLWETKYGCDGWGAKDVLKYFVKHHGSGGTWGTDNVRYQNVLSRTFLAACGKLGIGPNDDFNDWSKPQTGAGRFLVSERNGARCCAATAYLAPALGRSNLTVLSGVYARKLSISNNACTGVQFCIDSSATFEARTASDGEVVCAGGAMQTPQMLMLSGIGPKAQLKEHGIPLVADLPAVGENLQDQPAGVVSYAVKPQFKGISSSSEARMPGTVYPNPRSVLKWLCARRGVLTSTGCDHGAFISLANETSPRLQLRFLATRAVTADGMGSFTTFRKTPNHPDGFSIQSIAARPLCRGRVMLKSASPEDRPILDYDWLNDEDRATLREGMRLARRIAKTASFDQYRAEEVFPGEAIQSDAELNEYLDQSVHSANALVGTCRMGPDARDTVVDSRLRVHGVARLRIADASVFPQLPGGQSGAPTVMVAERASEFL
>c278
IRRATAADAQAAAACEWDYIIVGGGTAGCVLANRLSASGEKRVLLLEAGSAKSLSSLMFRIPAGVLGLFLSEHDWAFQSCAQKQAQNRQIYCARGKVLGGSSAINVLLYNRGNAADYDLWETKYGCDGWGAKDVLKYFVKNQDDQSGLAAKNPQHHGSGGDNVRYQNVLSRTFLAACGKLGIGPNDDFNDWSKPQTGAGRFLVSERNGARCCAATAYLAPALGRSNLTVLSGVYARKLSISNNACTGVQFCIDSSATFEARTASDGEVVCAGGAMQTPQMQTPQMLMLSGIGPKAQLKEHGIPLVADLPAVGENLQDQPAGVVSYAVKPQFKGISSSSEARMPGTVYPNPRSVLKWLCARRGVLTSTGCDHGAFISLANETSPRLQLRFLATRAVTADGMGSFTTFRKTPNHPDGFSIQSIAARPLCRGRVMLKSASPEDRPILDYDWLNDEDRATLREGMRLARRIAKTASFDQYRAEEVFPGEAIQSDAELNEYLDQSVHSANALVGTCRMGPDARDTVVDSRLRVHGVARLRIADASVFPQLPGGQSGAPTVMVAERASEFL
>c279
IRRATAAEAQAAAAAEWDFIIVGGGTAGCVLANRLSASGEKRVLLLEAGSAKSLASLMFRIPAGVLGLFLSEHDWAFQSCAQKQAHNRQIYCARGKVLGGSSAINVLLYNRGDAADYDLWETKYGCEGWGAKNVLPYFVKNQDDRSGLAAKNPKYHGSGGTWSTDQVRYQNVLSRKFLEACEKLGISKNDDFNDWSKSQTGAGRFLVSERNGARCCAATAYLAPALGRSNLTVLSGVYARKLCISNNECTGVQFCVNDFFGGSSSSASATFEARTAAGGEVVCAGGAMQTPQILMLSGVGPKAHLKEHGIPLVADLPAVGENLQDQPAGVVSFSVKKECKGMSSSSHARLPGTVYPDPRVVLQWLTMRRGVLTSTGCDHGAFVSLANETSPQLQLRFLATRAVTADGMGSFTTFRKTPNHPDGFSIQAIAARPRCRGRITLRSAAPEDRPILDYGWLNDEDRKTLREGMRLGRRLAKTAAFDQYRAEEVFPGEAVQTDAELDEYLDQSVHSANALVGTCRMGPNARDAVVDSKLRVHGVKRLRIADASVFPQLPGGQSGASTVMVAERASEFL
>c280
IRRATAAEAQAAAAAEWDFIIVGGGTAGCVLANRLSASGEKRVLLLEAGSAKSLASLMFRIPAGVLGLFLSEHDWAFQSCAQKQAHNRQIYCARGKVLGGSSAINVLLYNRGDAADYDLWETKYGCEGWGAKNVLPYFVKNQDDRSGLAAKNPKYHGSGGTWSTDQVRYQNVLSRKFLEACEMLGISKNDDFNDWSKSQTGAGRFLVSERNGARCCAATAYLAPALGRSNLTVLSGVYARKLCISNNECTGVQFCVNDFFGGSSSSASATFEARTAAGGEVVCAGGAMQTPQILMLSGVGPKAHLKEHGIPLVADLPAVGENLQDQPAGVVSFSVKKECKGMSSSSHARLPGTVYPDPRVVLQWLTMRRGVLTSTGCDHGAFVSLANETSPDLQLRFLRFLATRAVTADGMGSFTTFRKTPNHPDGFSIQAIAARPRCRGRITLRSAAPEDRPILDYGPILDYGWLNDEDRKTLREGMRLGRRLAKSAAFDQYRAEEVFPGEAVQTDAELDEYLDQSVHSANALVGTCRMGPNARDAVVDSKLRVHGVKRLRIADASVFPQLPGGQSGASTVMVAERASEFL
>c281
IRRATAAEAQAAAAAEWDFIIVGGGTAGCVLANRLSASGEKRVLLLEAGSAKSLASLMFRIPAGVLGLFLSEHDWAFQSCAQKQAHNRQIYCARGKVLGGSSAINVLLYNRGDAADYDLWETKYGCEGWGAKNVLPYFVKNQDDRSGLAAKNPKYHGSGGTWSTDQVRYQNVLSRKFLEACEMLGISKNDDFNDWSKSQTGAGRFLVSERNGARCCAATAYLAPALGRSNLTVLSGVYARKLCISNNECTGVQFCVNDFFGGSSSSASATFEARTAAGGEVVCAGGAMQTPQILMLSGVGPKAHLKEHGIPLVADLPAVGENLQDQPAGVVSFSVKKECKGMSSSSHARLPGTVYPDPRVVLQWLTMRRGVLTSTGCDHGAFVSLANETSPQLQLRFLATRAVTADGMGSFTTFRKTPNHPDGFSIQAIAARPRCRGRITLRSAAPEDRPILDYGWLNDEDRKTLREGMRLGRRLAKSAAFDQYRAEEVFPGEAVQTDAELDEYLDQSVHSANALVGTCRMGPNARDAVVDSKLRVHGVKRLRIADASVFPQLPGGQSGASTVMVAERASEFL
>c282
IRRATAAEAQAAAAAEWDFIIVGGGTAGCVLANRLSASGEKRVLLLEAGSAKSLASLMFRIPAGVLGLFLSEHDWAFQSCAQKQAHNRQIYCARGKVLGGSSAINVLLYNRGNAADYDLWETKYGCEGWGAKNVLPYFVKNQDDRSGLAAKNPKYHGSGGTWSTDQVRYQNVLSRKFLEACEKLGISKNDDFNDWSKSQTGAGRFLVSERNGARCCAATAYLAPALGRSNLTVLSGVYARKLCISNNECTGVQFCVNDFFGGSSSSASATFEARTAAGGEVVCAGGAMQTPQILMLSGVGPKAHLKEHGIPLVADLPAVGENLQDQPAGVVSFSVKKECKGMSSSSHARLPGTVYPDPRVVLQWLTMRRGVLTSTGCDHGAFVSLANETSPQLQLRFLATRAVTADGMGSFTTFRKTPNHPDGFSIQAIAARPRCRGRITLRSAAPEDRPILDYGWLNDEDRKTLREGMRLGRRLAKTAAFDQYRAEEVFPGEAVQTDAELDEYLDQSVHSANALVGTCRMGPNARDAVVDSKLRVHGVKRLRIADASVFPQLPGGQSGASTVMVAERASEFL
>c283
IRRATEADAKAAAASEWDFIIVGGGTAGCVLANRLSASGEKRVLLLEAGSDKSMSSLMFKIPAGILGLFLSEHDWAFQSCAQKQAQNRQIYCARGKVLGGSSSINVLLYNRGNAADYDLWETKYGCDGWGAKEVLPYFVENQDDRSGLGAKNPKYHGTGGIWKTDHVRYQNVLSKKFIAACGMLGIGPNDDFNDWSKPQTGAGRFLVSQNNGARCCAATSYLAAALGRPNLTVLSGVYARKLCISNNTCTGVQFGIGSSATFEVKTASNGEVVCAGGAMQTPQMLMLSGIGPKAQLKEHGIPLVADLPAVGENLQDQPAGVVSYAVKPNWKGISSSSEARMPGTVYPSPYSVSKWLCARRGVLTSTGCDHGAFISLGKETSPKLQMRFLATRAVTADGMGSFTTFRKTPNHPDGFSFQSIAVRPACRGRVTLRSKAPEDRPILDYDWLRAEDRATMREGMRLARKLAKTDEFKDYIAEEVFPGEAIQTDAELDEYLDQSVHSANALVGSCRMGPNAKDAVVDTRLRVHGIARLRVADASVFPQLPGGQSGAPTVMVAERASEFL
>c284
IVVGAGSSGAVIASRLSEDPDVSVLLLEAGDSSDNQLVRCPPLFMETQLTDNDWQDVTPPQKHLNDRVIRLPRGKVLGGCSSTNATVWVRGHPENFNGWERQGCEGWGYADVLPYFKKCENRGIGGPVSVATPRDLGAMNVLSEAFIASCPDAGIPLTDDYNGPVQEGVGPTQVCACTGLRKRPVRFVGCRREVIVSAGAHNSPAILQHSGLNPVLSRGWVRIRSSDPLDPPEIETNFLKEQRDMDVMVESLRTARKIVQSPHFAKYAGKEVIDTTIPHDPESREYLEEFVRRTSNTVYHPVRCTARMGRATDATTVVDPRCRVVGIRGLRVADASIIPHVISGNTNAPCIMVGEKVADMI
>c285
IXSCMSRTCTSSFQSSPASTFTFLIQTLIASRCKLNNPDEYPRDRVNDVLRSSMEFDFVIVGGGTAGSVLARRLTEVENWKVLLIERGGYPLPETAPPAFFIKNLGLSQDYAYKIEYLKDACLSQVDKRCRWSKGKTLGGSSVINAMLYILGNKRDYDTWANLGNPGWNYEQVLPYFRKSSSCSSEYIAEHGTDYCGSDGPIKIRHYNYTATDLQNIMLEAMHEAGYDILEPLNNDRFIGFGRAMGTLDNGQRQNCAKAFLSPIKNRKNLYVMMSSRVDKILFEGKRAVGVRITLSNNKSVNVRATKEVILSAGSIASPQILMLSGIGPKEHLKEMGISTLVDLPVGRNLQDHAIWLGLYYSYSNESVTSSPSEKNKLDDIYDYLEFNTGPLRVLPLDLNGFVNVNDPHSKYPNVQLMFVPYQRYSNGLLYLFQSFNMDNDILQEIQKDVMETNLISICPILIRPLSRGFLELRNTNPADPVKIHANYFVEKEDFKMLLKSVDIAKALLNTEALKKYNMTLYYLNIPGCQHTKPGTDEYWECSLKHLSTTLYHPSGTAMMGPANDSRAVVDSRLKXHGIKNLRVIDTSIMPEVTSGNTNAPTMMIAEKGADMVKQDWGVKIQI
>c286
IYRAPVESWGSVDKAMRQSAMALGHPWHDDLNAPDAEGACTYPINSRAGKRVSVNDGYLEAARDRPNLTIIGQATVDKVLFDGRKAIGVLAIVAGQVRKFEAPLVIVSAGAIHSPVILQRSGIGPAALLKRKDIEVLADLPVGEGFFDHPYCRIELKLKPGFKATDLDARHTNCCVRMSSGVPGAERDDILYVAMNHGGIGVESDSAQFGEAMVNLILMEAKSRGTVQLRSANPFDQPLVEENMLDDPMDLQRMRIAYRHLGEIARQAPIQAIAERVLLGDSDLPLSWLETASDEEVDNFLLAQSSDAQHGIGGCCMGRLGEAVVDPECRVYGLEGLRVIDASIMPLDCQANTNLTSIMIGEKMADSLRRSI
>c287
KAQTHELGPGDYRGGSGPLHVSRGTSGNQLHSVFIEAGQQAGHAVSEEINGFRQEGVGPFEMTIKQGKRWNTASAYLRPALQSRPDRVSVKDSVLVHRVLFEGKRAIGIELINSNKEVEKVYANEIILSGGAINSPQLLMLSGIGDADHLKSIDIPVVHHVPGVGQNLQDHLELYIVQKSKKPVTLLSDQKFPRMIQVGIQWFLNQTGSCATTHLESGGFTRSRPGVPHPDIMWHFVPSHVIDHGRQTPSHEAYQLHAGPMRPTSRGWVKLKSKNPKDHPIIQPNYLSTEIDRWEMRESVKLSREILAQKAFDEFRDIELEPGDDVQTDEQIDAFVRAKSDSAYHPSCTCRMGSSSDNDTVVSAEGKVMGVEGLRVVDASVMPQVVSGNLNGPTIMVAERMADLIKGQ
>c288
KATRVEFISGEHLYRASPISDKSNTTLPKTFRVCAKKEVIVSSSAFNSPQILMLSGIGNPENLKLLNIEPKVNLPGVSKNLQDHYEIPVNFELDTEWKMMKICKFLADNLDECWIKYLKGYSPYNLARDIFSQTLKSTASSKDTDVMQYVLPTRWFGYTNTMAQDATRFRNHISIVTQLDHINSKKGTLTLKSNDLRDTPNINFNYFQDRGNKDIAKIIFSIRSAHKKIKVTGWKMIETKPSNHLEKYIRENLFSHHACCTNKIGKDSDPEAVLDKDFKVCGVENLRVIDQSLIPYIWGNFPVLATYMLGIKGADAILN
>c289
KAVGVEYISEELSPMRVSMTASLTPRGEVIMSSGSIHTPQILQLSGVGDAGALAAFGIESVAHVPGVGQNLQDQPAVVVSSPVKREFEGKSITDQIYNLRGNIRKRALLSWIMFGKGPLTSTGCDRGAMVRTSAAQGHLPDLQMRFVPGMALEPDGVSTYTRFGNFKKEGRKWPSGVTFQVLAARAAGKGQVSLKSDDPFDSPLIESGYLTDRDGRDMATLKNGIELARKIASTGTMSSVLDGEIFPGADVLAPAAVEEYIRRTIHSSNALVGTCRMGTAAENGDVVDKDLKIFGLEGIRVVDASVIPIIPGGQTGAPTVMIAERAADMI
>c290
KCTSYFMSLTSAINKSLSSAVVANRLSEIENWKILLLEAGGDETDISDVPVLAAYLQLSGLDWSYKTEPSSTSCLGTVRNGARCSTSKAFLQPVKTRPNLHISLHSHVTKVLIDPKNRMAIGVEFVKNHQRHVIRARKEVILSGDRKTKLLLMLSGIGPADHLQELRIPVIQNLPVGYNLQDHIAMGGATYLIESPPECLPLGAGIVLPRIFTIDSLMRFLRNHDGPLYGLPFCEGMAFVNT
>c291
KEILKYGINRSGFLNLPSAPVLGFFKTRTELAVPDIQVHFIPYRVVLENGKRKLGEEPGMTCTVNQNQPESVGSVHIKSPDPQQHPAIRYNFLSSRLDIDTLVAGVRLVRDIMNTDEMQMYCGEEMSPGSDCSSDEDILAFIRNKAETVYHSVGSCKMGKDAKSVVDEKLRVHQIKNLRIADASIMPTLTSGNTNGPCMMIGEKCADFIMNH
>c292
KEYSKIVVGAGSAGCVLAGRLTEDKDTSVLLVEAGPKDTILGSKFLQWKIHMPAALTYNLCDDKYNWYYNTLPQANANNRVMYWPRGRVWGGSSSLNAMAYVRGHAEDYNRWQRQGADGWSYEDCLPYFKKAQNHPLGGDDYRGGDGPLHVSRGSSGNPLHDAWLLAGQQAGYPLTEDMNGYQQEGVGKMDASIHQGKRWSAASAYLHPALSRDNLSTLTNVLVTRVLFEGKKAVGVEVVENGVTKKYRAGEVILSGGAINSPQLLLLSGVGDGDHLKEVGIDVVHHLPGVGGNLQDHLEMYVAQNCTKPVTLYSDQKGLRMIKVGLQWFLNQTGAASTAHLETGGFIRTKEGVTHPDIQFHFLPSQVIDHGRQPPYLEAYQVHVGPMRAKSVGWLKLASSDPRTAPLIQPNYLSTEQDRWEMRQCVKLSREIFAQPAFDQFRGPELAPGADVQTDSQLDEFIRAKSDSAYHPSCTCKMGDSSDNLAVVDSSTAVIGLDNIRVIDSSIMPSIVSGNLNAPTIMLAEKAADIVRG
>c293
KEYTKIIVGAGSAGCVLANRLTEDPETEVLLLEAGPKDTTLGSKRLSWKIHMPAALTYNLCDDKYNWFYNTLPQHNCNDRVMYWPRGRVWGGSSSLNAMAYVRGHAEDYNRWEKEGATGWKYENCLPYFRKAQTHELGEDQYRGGDGPLHVSRGTGGNTLHDAFIKAGQEAGYPFTEDMNGFQQEGVGYMDATIHKGKRWSTASGYLRPVLSRKNLFTMENVLVTRVIIEGGRAVGVELEQGGKKRRIRSSEVILSGGAINSPQLLLLSGVGPGDQLNKVGVEVVHHLPGVGENLQDHLEMYVVQQCSQPVSLLGDQKGLRMIKVGLQWFLNQTGAASSAHLEAGAFLRSRAGVEHPDIQIHFLPSQVIDHGRVAPTLEAFQAHVGPMRATSRGWLRLKSANPRDSPLLQPNYLETEQDRWEMRQCIRLTREIFSQPALQPFRGKELGPGSEAQTDSELDAFIRAYSDSAYHPSCTCRMGSEDDSMSVVDTSGRLLGLQGLRVVDASIMPSIVSGNLNAPVVMLAEKLADTIRGR
>c294
KFDHIIVGAGSAGCVLANRLSENGSKSVLLVEAGPKDTSFFNNDLGKMLKWQIHMPSALMFNLCHDKYNWFYHTVPQPNVNNREFYWPRGRVFGGSSSLNAMVYVRGHGFDQNRWAQECGDPEWDYDHVLPYFKRAQNFESGGDLYRGSGGPLEVSEGSINNPLYRAFIEAGVQAGYPESSDLNGYQQEGFGRLPMTVNPKAGMRWSAASAYLRPAMKRENFSVLSQTLTDKIIFEGTTAKGLKISNFKNGNETEEIFGEEIILCGGAINSPSLLQLSGVGDSKHLKSVGIXXXXEPVVDLPGVGENLQDHLEVYVQQECKKPLTLYSAQQPHNMVRIGAQWFLTRKGXXXXICAGNHLHAGAFIRSRADPEIDHPDIQFHFLPSQVIDHGRQNPTIEAXXXXYQVHVGTLRAKSVGFLKIKSSNPREHPLIDPKYFTDPADLPDLVTAVKLTREIFAQKAXXXXFDEYRGPEVIPGPKYETDSEISEWVKEACETAYHPSCSCKMGKESDKLAVVDSKCHVFGTXXXXQNLRVVDSSIMPSVASGNLNAPTIALAEKASDII
>c295
KFDHIIVGAGSAGCVLANRLSENRSKSVLLVEAGPKDTTLFNNDLGKLMKWQIHMPSALMYNLCHDKYNWFYHTVPQPNVNNREFYWPRGRVFGGSSSLNAMVYVRGHGLDQNRWARECGDPEWDYDHVLPYFKRAQNFQNGGDLYRGAGGPLEVSEGSINNPLYKAFIKAGVEAGYPESSDLNGYQQEGFGRLPMTVNSKAGMRWSAASAYLRPAMARENLTVLSQTLTDKIIFDGTTAKGLKISNFKNGSETEEIFGEEIILCGGAINSPSLLQLSGVGEPEHLKSVGIKPVVDLPGVGENLQDHLEVYVQQECKKPLTLYSAQQPHNMVRIGAQWFLTRKGXXXXICAGNQLHAGAFIRSRADPEIDHPDIQFHFLPSQVIDHGRKNPTIXXXXEAYQVHVGTLRAKSVGHLKIKSSDPREHPLIDPKYFNDPSDLPDLVAAVKLTREIFAQXXXXKAFDEFRGPEVIPGSKYQSDKEISEWVKEACETAYHPSCSCKMGKESDQSAVVDSKCRVFXXXXGTQNLRVVDSSIMPSVASGNLNAPTIALAEKASDII
>c296
KGWNSSDVLPHFLRSEDDQIGFHKTDPKHHASGGDWSVDHVRYQNPLSKKFLEACGQAGLKANDDFNRWDRSQEGYGRFAVSQRNGTRCDAATAMLEPALADSKRDLKVLTGTLVKQIIFDDKTQTTGVKFSVKGFDHVARLNAGGEVVLSAGAIQSPQVLMLSGIGPKAHLKEHGIQVVADLPGVGENLQDHPAAVVSYECPASQKGISVTSKLKISGTAIPDPRPMLQWLFTKSGPLTSTGCDHGGFFRTPAAVGKSPDLQLXXXXFLAARAVTADGMGTFTAFKKTTNHPDGFSLQSIATRPMSRGRVLLTSADAAKKPAIEGNYLTNKHDVATLREGLKMARQIAQQPAFKDYLSHEVFPGAHVKTDAELDAYIADSVHTANALVGTCRMGEVTDPQTVCDASMRVKGVKGLRICDASVAPALPGGQSGACVVMIAERAADMMLGR
>c297
KHLIISAGLFLANSSGTLRLRSANHNDDPILEYRLLENPFDLMRMREGVRMNIKIGSEKAFNKILGERISPNATEFKNDESLNEWLLSTVNTTHHISCTARMGFSKDPMSVVDQYGKVYGINNLRLADLSIMPDCIRANTNATAIMIGERISSFIEEGN
>c298
KINTANGIASGVEAEVVDQATGNVKTRLSVKASIVVLAAGPTGSPLLLQNSGICNSSGQVGKNFACHPSLSVTAMFDKKLNDFHGATHSLFEDSHTLPEQGGWIQLNAVQEPVEASFMAEPGTGKPYVRYMQNYPNSTRLITLIHDKNVGEVTLENGYKEIRYQVDDEDFEAMKKGLKENARILFAAGASYLYLPTSDKTRINSVDEIDKVIDELKNEPARYRYTSFHPQGTCRMGADKTKTVVNPYGETHDVKNLYIVDASLLPTSIGYNPSETVYALASYIADQINSANPS
>c299
KKFDYIIVGAGSAGCAVANRLSENPSNQVLLIEAGKSSHPVSRLPASFALLIDNPNANWRYRSDPEESTSNREIPIPRGKLLGGSSSINGLVYVRGNKLDYDTWAQMGNTGWSYDDVLPFFKNMENYQSGTSELRGTNGPLKVSEVTDRNPIYNGLFKAAEELKIPVNKDYNGDSQEGIGYTQTTIYKGERMSAEVAYLRPIKSRKNLSIITNSLVTKLLFEGKKCVGLEVKNKNKLVNYFSSKEIILSGGAINSPQILELSGVGKRDILEEKGITVIHDLKGVGENLRDHIAPRIVYKITKPGIAYNDKARGFNLVKQVANYIFKRDGFLTLPSAPVVGFLKTKKELAAPDIQVHFIPYKVVLENGKRKLGAEPGITCTVNQNLPESKGSIHIKSTNPEEPPSIKFNFLSSPLDRETLVSGVKLIRKLMKSKTMKEFCGEEVQPGENLSTDEDILKFIRDKAETVYHPSGTCKMGFDQESVVDKNLKVHGIKGLRIADASIMPTLVSGNTNAVCMMIGERCA
>c300
KKVLVLEAGTPDYNAMIVRIPAGILRLFRNTKYDWQHETGGEKACNGRNVFLQRGKVLGGSSCTNVCLHHRGSAQDYDDWGVPGWKAADVLPFFKASQKDMTGRSPEFHGVDGDWVMDDVRYQNPLSKRFLEVGEKAGLGTNDDFNNWGRTQEGVGRFQVSEINGERCSGANAFLTKAMKNKNCKVRTGTMVRRINFDQSKTATGVTYDLMGDDTMKAFEAKLNPGGEVIVTSGAIASPQLLLCSGIGPSQHLKDHGIPVVHDNPNVGENLQDHPAAVVSFKTPVKGVSVTSKLRLFGMTNPFPILQWLIFKTGLLTSTGCDHGAFVRTSASIKGQPDLQIRFLAARALGPDGMTTFTQFRNSKSHDDGYSLQSVACRAKSQGSVRLVSSNTHIKPAIDGGYLSDPNDLKTLREGIKLGRQLGNSPDWGEYLGEEVYPGLDVQTDAEIDEYIKNTIHTANALTGTCKMGTGKDAVVTPELKVIGVNGVRVADSSTIPILPGGQTATPTVMIAERAAAFL
>c301
KLILIGTPQTDHKVSNGNQYHWNRGKSLGGSSAINFSAWTVPPKSDIDDWERLCNRGWNWENYEKHIELMNCQDIIHWDLHSRRIPSVVTKSH
>c302
KLLSSQGTDKADYSKIIIGAGSAGCVLANRLTENPNNKVLLVEAGPKDTILGTKWMQWKIHMPAALTYNLCDDKYNWYYHTVPQKNVNNRVMYWPRGRVWGGSSSLNAMVYIRGHAEDYNRWEREGAAGWNYENVLPYFKKAQTHSDGGDDYRGHDGPLNVTRYKGLGELDQAWLKAGQQAGYPFTEDMNGYQQEGVGLMDATVHNGMRWSAASAYLRPALQRQNLTTVNGVLVTRILFNGKKATGVEVIENGQTKQYMADEIILSGGAINSPQLLMLSGVGPKKHLEQVGVKTIHDLPGVGQNLQDHLELYMVQGCKKPVSLLRDQKGLRMIQVGVQWFLNRTGSASSTHLETGGFVRSGPGVPHPDIQFHFLPSQVIDHGRVAPKIEAYQVHVGPMRATSRGWLKLQSKDPKQHPLLQPNYLDTEQDRYEMRQCVKLTREIFAQEGFDNYRGDEIAPGAEVQTDEQIDQFIRDKGDSAYHPSCTCKMGDTSDDMAVVDSQCRVIGLENLRIVDASIMPSVASGNLNAPTIMIAEKAADMIKG
>c303
KLLYILVIHHSVRAYDEATILYFENLINSTINETANYVIPTSSEEFRGNYYCSKDAKDFGSYDFIIVGSGSTGATLAARLAEEEKFKILLIEAGGAENNFTDIPGLYFYSRFTDYNWGYFSVPQEHACLGMKDRRCPFPRGKAVGGTTVINGLIDSRGNRDDFDTWNQLVNGSWSYEEVLPYFKKIEDSHIDGDPGYHGEDGPFPVYYHNPISPQVDAYLGANEELGYKVLDFNGAHQIGVSRNQLNNIKGRRVSTAKAYLDPARKYSNLKIVDKAYVTRVLIDDKTAYGVEFMLNGEKTIAKVEKEVIVSGGVIASPFILMHSGIGPKLELEKYNIPVVKDLPVGSNLHDHPTFYGLSFRTNFNQPKYTQREYIEQYLDGKGDFTIAANLQGIGYYQSKHMQIPGLPDIEFLISPSGMENAASQESFHLTDETFQAVWGNLNRVTDFLMYVVLLKPKSIGYVTIKSNDPFDFPIIDPKFLSDAENVDIDAIYEATEYLLSLLKTDHYKKLNVTLIKVVFEACKDTEYLSKEYWYCTIRQITMNVYHPVGTCKMDLERHGGIVNKDLKVYGVKRLRVADGSVLPFSLSGHPSMASIMIGEKLSDMLKKQYMA
>c304
KNIRKAHAAEEKVSGEEYDYIIAGGGLAGTVLAERLTADGTKNVLMLEAGSADYKNKFINIPAGILRLFKSSFDWDYETKGEKACNGRNVYFARGKVLGGSSCLNVLLHHRGTNKDYDDWGVPGWGSADVLEYFKMSHDDLTNRDPAYHGKGGEWTMDEVKYQNPLSKKFLEVGAAAGLGTNDDFNNWGREQDGVGRFQVSAKKGARVSGASAFLSKAIKRKNLSVRTGTMVRRINFDSSKTSTGVTYDLIGDDTMKQFSPKLKKGGEILVTSGAIASPQLLMVSGIGPADHLEENGIKVVADLPGVGENLQDHPSAVVSFKTPKKGISVTSKLRIPGTTITNPLHAFRWLFFGTGILTSVGCDHGAFTKTSAADGQSDLQVRFLPAKALSPDGMTTFSLFRTTPNLEDGYSFQSVAVRARSRGQVRLASSNTHVKPSINAGYLADAADMTTLREGIKLGRKLGNRDEWGNLKGEEVYPGTEVQTDDEIDEYIRNTVHTANAIVGTCKMGSDASSVVGPDLKVHGVGGVRVIDSSIIPRIMGGQTGTPVVMIAERAAAFM
>c305
KNYDFIIIGAGSAGAVVANRLTEVSNWTVLLLEAGGDETFVSDIPAMAAILQLSNLDWKYRTEYQSTACLAFIDQRCNWPRGKVLGGSSVLNYMLYVRGNRRDYDSWAAMGNPGWSYEEVLPYFIKSEDNRNPYLAETPYHGTGGYLTVQEAPYKTPLVTAFVQGGVEMGYQHRDGNGAYQTGFMIAQGTIRRGSRCSTAKAFLRPVRKRKNLHISMNSHVLQIMIDPVTKQASAVKFERKGKIYIIKATKEVILSAGSVNSPQILMLSGVGPSEHLSQFGIPVISDLRVGDNLQDHIAAGGMVFTLEQSVSLVQRRFENLPSILRYAMFDSGPLTTLGGVEGLAWVNTKYANKSDDWPDIEFHFVSGTPVADSGVLIRRAHGLTDYVWDNYFQPLVNQDTWSVIPMLLRPKSTGYIRLQSSDPYDKPLIYPNYFYDEYDLRVLVEGVKIGLALGETEAFKKLGSKFYTRPFPGCEHLPLWQDEYWSCFVRHYSATIYHPSGTCKMGPAEDHTAVVDPQLRVYGVSRLRVIDVSISPNVVSGNTNAPAIMIAEKGADLI
>c306
KPKSRGRVKITSADATAAPSILFNYYQEQEDREAWRQCIKLTREIINQPAMDSYRGDEIQPGIDVTSDADIDKWVKDNVESAYHPAGTCKMGEQSDLMSVVDAECRVHGIKNLRIIDASVFPTLPNGNINAPVIMVAEKMADVILGE
>c307
KQWDYIIVGGGTAGCVLANRLTSKGKNVRVLVLEAGSGDYNHPMVRIPAGVLKLFQGDKDWNFTSVNETKTSGRGIYLCRGKVLGGSSALNVALYTRGDKHDYDAWETEFGCVGWGAKDVLPLFMRTEDDRTGHAVKTPRHHGVCGEWAVEHVRYQNPLSKLFLQACKQAGLPMNDDFNDWSKKQEGAGRFPVSSRRGERVHAASALLAPALADSKRQLQVLTGALVRKIIFEKNVAKGVQFAADGVVHIARLAPDGEVLLAGGAVHSPQVLMLSGIGPKEQLEQNGIKVLQDLPGVGENLQDHPAAVVSFECPKNQSGVSVTSKIRIPGTTLPHPAPVLEWLFKKTGPLCSTGCDHGGFFRTSAAPAGCPSPDLQMRFLAARAVTADGMGSFTKFRDMTNHPDGFSFQSIAVRPQSRGRVLLASSDPDAKPLIETNYLSSEQDFATIREGIRLGRKLAQQPAFKEFLGSEVFPGTHVQSDKELDAYISDSTHTANALVGTCRMGPAGDAKTVVDPDMRVKGMTGLRVCDASIMPKLPGGQSGACTVMIAEHAAEII
>c308
KQYDHIIVGAGSAGCVLASRLTECGSKSVLLVEAGPPDTLLGSALLRWQIHMPSALMYNLGHDKYNWYYETVEQPHVKNRKFYWPRGRVFGGSSSLNAMVYVRGHAYDQNRWAREIDDPEWDYDHVLPYFKRAQRHQKGASQYRGGDGPLHVSEGSIQNELYQAFIDAGVQAGYPHSDDLNGYQQEGFGRLDMTVQGMRWSTASAYLRDAMKRPNLHVLSKTMTDRIIFNGTTAKGIEVSDWRNPLEKETFYGQEVILSGGAINSPQLLQLSGIGNADELKGLGVDPVVDLKGVGENLQDHLELYVQQESKVPVTLYSAQQYHRMPFIGLQWFLSGTGVCAGNHLHAGAFIRSRADPEIDHPDIQYHFLPSQVIDHGRKPPDREAYQVHVGTLRAKSVGHLKIKSQNPREHPLIDPKYFSHPEDLPDLIAAVKLTREIFAQKAFDKYRGPEVIPGDHVQSDKEIENWVLEACETAYHPSCSAKMGRESDPMAVVDSKCRVFGTQNLRVVDSSIMPSVASGNLNAPTIAIAEKASDIIRGRASL
>c309
KQYDHIVVGAGSAGCVLANRLTECGSKSVLLIEAGPPDTLLGSALLRWQIHMPSALMYNLGHDKYNWYYETVKQPNVRDRKFYWPRGRVFGGSSSLNAMVYVRGHAYDQNRWAKEIDDPEWDYDHVLPYFKRAQTHQKGSSEYRGDNGPLHVSEGSIQNELYQAFIDAGVQAGYPHSEDLNGYQQEGFGRLDMTVNPKTGMRWSTASAYLRDAMKRPNLTVLSRTMTDKVIFNGTTATGIQVSSWKNPNQTEIINGSEIILSGGAINSPQLLQLSGVGNADELKQVNVEPVIDLKGVGENLQDHLELYVQQESKLPTLYSCQQYHRMPVIGAQWFLTGTGVCAGNHLHAGAFIRSRADPEIDHPDIQYHFLPSQVIDHGRTPPDREAYQVHVGTLRAKSVGHLKIKSNNPREHPLIDPKYFTHPEDLPDLISAVKLTREIFAQTAFDKYRGPEVIPGKHIQSDADIENWVLDAAETAYHPSCSAKMGHEDDPMAVVDSKCRVFGTQNLRVVDSSIMPSVASGNLNAPTIAIAEKASDIIRGR
>c310
KQYDHIVVGAGSAGCVLANRLTECGSKSVLLIEAGPPDTLLGSALLRWQIHMPSALMYNLGHDKYNWYYETVKQPNVRDRKFYWPRGRVFGGSSSLNAMVYVRGHAYDQNRWAKEIDDPEWDYDHVLPYFKRAQTHQKGSSEYRGDNGPLHVSEGSIQNELYQAFIDAGVQAGYPHSEDLNGYQQEGFGRLDMTVNPKTGMRWSTASAYLRDAMKRPNLTVLSRTMTDKVIFNGTTATGIQVSSWKNPNQTEIINGSEIILSGGAINSPQLLQLSGVGNADELKQVNVEPVIDLKGVGENLQDHLELYVQQESKLPTLYSCQQYHRMPVIGAQWFLTGTGVCAGNHLHAGAFIRSRADPEIDHPDIQYHFLPSQVIDHGRTPPDREAYQVHVGTLRAKSVGHLKIKSNNPREHPLIDPKYFTHPEDLPDLITAVKLTREIFAQTAFDKYRGPEVIPGKHIQSDADIENWVLDAAETAYHPSCSAKMGREDDPMAVVDSKCRVFGTQNLRVVDSSIMPSVASGNLNAPTIAIAEKASDIIRGR
>c311
KQYDKIVVGAGSAGCVLANRLTEDANTKVLLIEAGPKDTILGSKILQWKIHMPAALTYNLCDDKYNWFYHTLPQKHCNNRTMYWPRGRVWGGSSSLNAMAYVRGNALDYDRWESEGATGWSYEDCLPYFKKAQTHEYGEDDYRGGSGPLKVSRGTSHNPLHQAWLKAGQEAGYPFSEDMNGFQQEGVAYMDATIHKGQRCSASVAYLHPILSRPNLETITNTMVTRIIFENKKAVGLEIVENGVTKKIRGEEIILSGGAINSPQLLLLSGVGDSKDLKEVGIEPVHHLPGVGQNLQDHLEMYVAQNCKKPITLYSDQKGLRMIQVGLQWFYNRTGSAASAHLESGGFFRSHAGVPHPDIQVHFLPSQVIDHGRKPPYLEAYQVHVGPMRATSKGWLKLKSKDPRDAPLLQPNYLETEQDRWEMRQCVKLMREIFAQPAFDEFRGLELAPGESVQTDEQIDAFIREKSDSAYHPSCTCKMGDSSDNMAVVDRNTDVIGLENLRVIDASIMPSIVSGNLNAPTIMLAEKAADIVRGR
>c312
KSKNPKDHPIIQPNYLSTEIDRWEMRESVKLSREILAQKAFDEFRDIELEPGDDVQTDEQIDAFVRAKSDSAYHPSCTCRMGSSSDNDTVVSAEGKVMGVEGLRVVDASVMPQVVSGNLNGPTIMVAERMADLIKGQ
>c313
KSRTAAGVVPHPFSAFSLSPVHLAPQSRGMVRIRSSNFQDKPEIRFNFLKHDEDMETLKRGIKLSRKIARQAALREFIVEEVLPGPTVNTDDEIEAD
>c314
KSVRSATAADAQAAAAGEWDFIIVGGGTAGCVLANRLSASGEKRVLLLEAGSDKSLSSLMFRIPAGILGLFLSEHDWAFQSSAQKNASSRQIYCARGKVLGGSSSINVLLYNRGDAADYDLWETQYGCTGWGAKSVLPHFVQNQDDQSGLAAKNPKHHGTGGMWTTDNVRYQNVLSRTFLAACGMVGIGQNDDFNDWSKPQAGAGRFLVSERNGARCCAATSYLTAALGRKNLTVLTGVYARKLVIKKNTCTGVQFALGKDSSATFEAGIAADGEVVCAGGAVQTPQLLMLSGVGPKAHLAEHGIPLVLDLPAVGQNLQDQPAGVVSYAVKPEFKGISSSSDARMPNTVYPNPRSVLQWLCARRGVLTSTGCDHGAFVPVANEASPRLQLRFLATRAVTADGMGSFTTFRKTPNHPDGFSVQAIAARPKCRGSIKLRSANPEDRPLLDYDWLNDEDRATIREGIRLGRQIAKTAAFEKYKAEEVFPGEAIVTDAQLDEYLDQSVHSANALVGTCRMGPKEKDTVVDSALRVHGVAQLRIADASVFPQLPGGQSGAPTVMVAERASEFL
>c315
KSYDYIIAGGGLAGCVLAERLTSDGKSKVLMLEAGRSDYNTLFIRIPAGILRLFRSVYDWQYETSGEEDCEGRNIYLQRGMVLGGSSCTNVLLYHRGSAMDYDSWKVPGWTSSDVLPFFKLSEDDKIGKSSDYHSKGGEWTVDQVRYQNPLSKAFLTVAHDEWGLPYNDDFNNWSRSQEGIGRYDVNEKNGERVSGASGFLSKAIKRKNLTVRSGAMVRKIEFDESKTAKSITYDLMGDDTGDTFSAKLADGGEVIVTGGAIASPQILMCSGIGPRKELESLGINVIADLDGVGQNLQDHPAAVVSFTTPKKGVSVTSKLRIFGLSNPFPLLRWLLFKTGLLTSTGCDHGAFIKVGENVEQPNLQLRFLPAKALTPDGMTTFTKFRTAKTLEDGYSFQSIAVRSKNRGEVKLASSNTHTKPIIDLKYLHDRDDLITLREGIKLTRKLGRSSKWNEYLGEEVFPGPEVNSDEEIEDYIRRSVHTSNALTGTCKMGLGDDCVVTPDLKVRGVQGVRVADSSILPQIIGGQTATPTVMIAEKAAAFLKAK
>c316
KSYDYVICGGGTAGSLLANRLTANGDKSVLVLEAGSKKYNDIRIKIPAGILKTFKSEFDWDYESVPTSHTADRPIYLCRGKVLGGSSCTNVLLYNRGDKSDYEAWEKATGDKNWGPEGVLPYFKRSEDDHRGGSMYHGVGGEFSISDVNYQNPLSRTYLSACDEFGVPLNDDFNDWSRPQEGAGRYQVSEKNGVRCSAASAFLEPALSRKNLEISCSSQTSKILFDSSKSAIGVEYIKNGKKCMAKLNENGGEVLLTGGVVNSPQILMLSGVGPQAHLSQHNIPLVHDSIGVGKNLQDHPACVVSYECSDGNAGVSVTSKIRIKGTTITNPKVIAQWLFKKAGPLTSTGCDHGGFFKTKSTLTSPDLQMRFLPAQAITPDGMGTFTKFRETANLKDGFSFQSIAVRPESTGELLLRSDNIQDKPLIDVGYFRSQKDIETMRDGIKLSRKIATTTQAFQPYLGREVYPGESVQSDNDIDRYIRETIHTSNALVGTCKMGAKDDEYAVVDSELKVKGVQNVRVVDASVMPKIPGGQTSAPTVMIGEKGADIILGR
>c317
KTEDDRIKIEDDIDYVIIGAGTAGCIVATRLVEAGYKVFVLEAGRDAPNSTDTDRLSHHFYGTSVSWNYTTEAQEHALFSRHEHKISIYAGKLMGGSGSINAMIFLRGSRHDYDKWEEMGATGWRYETILPYLKKVEKSYLTNVDQDKHGQDGKIKISNQESQNDPLMKSFIEAVN
>c318
KVLCGSPVQRILFTKDGAKAAGVHFSTDGVDHIAQLAPGGEVLLTGGAIHSPQLLMLSGLGPAQHLQKHGIKLVRDLPGVGENFQDHPAAVVSYQCPDAQRGISISSEMRVCGTSLPHPVPLLRWLLFRSGPLTSPACDHGGFFRTAAAPEGAKSPDLQMRFLAARAVTADGMATSCNFKQTSNHPDGFSFQSVAVRPLSRGRVSLASANPSDKPIIEGNYLTDAQDMATLREGLRLSRKIAKQPAFAEYLGHEVFPGPGFETDAELDAYIASTVHTANAIVGTCRMGQAKDPQAVCDPQMRVSGVQGLRVCDSSVMPKMPGGQTGAATVMIAERAADMIWDYIIVGGGTAGCVLANRLTAAQKKVLVLEAGRADYDTTLVRMPAGLLRLFRSKYDWDFTSSNEARTSGRGIYLPRGKVLGGSSSLNVLLYNRGDANDYNLWAEEFGCQGWKADDVLPYFKRSEDNQTGLAASDPKHHSTGGEWSVDHVRYQNTLSKRFLEACKQMGLPLNNDFNSWGRKQDGAGRFFVSERKGSRCSAASAMLEPALKDKKRCIKVLCGSPVQRILFTEDGAKAAGVHFSTDGADHIAQLAPGGEVLLTEGAV
>c319
KVLLVEAGPKDTILGSKFLQWKIHMPAALTYNLCDDKYNWYYHTLPQRHVNNRVMYWPRGRVWGGSSSLNAMAYVRGHAEDYNRWEREGAAGWSYEAVLPYFRKAQSHSEGGGEYRGGEGPLHVTHYSGQGVLDQAWLQAGQQAGYPLTEDMNGYQQEGVGRMDSTVHKGMRWSAASAYLRPALSRENLSTMNSVLVTRVIFEGKKAVGIEVEENGVTKKIRAGEVILSGGAINSPQLLLLSGVGETDHLREVGVEAVHHLPGVGQNLQDHLEVVGIQWFLNRTGAASSSHLETGGFIRSGPGVPHPDIQFHFLPSQVIDHGRQAPTLEAYQVHVGSMRATSKGWLKLASNDPRKHPLIDPNYLSNEQDRHEMRQCVKLTREIFAQPAFDPYRGEELAPGADINTDEEIDEFVRRKGDSAYHPSCTCKMGASTDNMAVVDSECRVLGLEGLRVVDASIMPSVVSGNLNAPTIMLAEKAADIIKG
>c320
KVLLVEAGPKDTILGSKFLQWKIHMPAALTYNLCDDKYNWYYHTLPQRHVNNRVMYWPRGRVWGGSSSLNAMAYVRGHAEDYNRWEREGAAGWSYEAVLPYFRKAQSHSEGGGEYRGGEGPLHVTHYSGQGVLDQAWLQAGQQAGYPLTEDMNGYQQEGVGRMDSTVHKGMRWSAASAYLRPALSRENLSTMNSVLVTRVIFEGKKAVGIEVVENGVTKKIRAAEIILSGGAINSPQLLLLSGVGETDHLREVGVEPVHHLPGVGQNLQDHLEVVGIQWFLNRTGAASSSHLETGGFIRSGPGVPHPDIQFHFLPSQVIDHGRQAPTLEAYQVHVGSMRATSKGWLKLASNDPRKHPLIDPNYLSNEQDRHEMRQCVKLTREIFAQPAFDPYRGEELAPGADINTDEEIDEFVRRKGDSAYHPSCTCKMGASTDNMAVVDSECRVLGLEGLRVVDASIMPSVVSGNLNAPTIMLAEKAADIIKG
>c321
KVVGGSSSINGMLYVRGNARDFDDWAQMGNRGWSWEEVLPFFRKSERRDGGDPAFRGTSGELRVSDMRDRFDLTDDVIRAGEELGYPRNPDYNGASQDGFAYYQVCQKAGLRHSAFRAFLKPALKRPNIELRTHALVERVVIEDGRAVAVEYRRGGRLERAAAGRGIALSAGAVQSPQLLELSGIGAPEVLQAQGIEVRAALPGVGENYRDHYMVRKSWRIARPVTFNEKSRGLSFAGEVLRYAFTRRGLLTMAPGVVAGFVRTRDDLAAPDVQYHIVPASYDDPRTKALARTPGMTVGTYQTRPESVGAIHIRSPRADEQPAIKGNYLATDFDRRALVGGMKIARALMETEAMRRHVAFEELPGAEVQTDEEWLDFAREAGFAIYHPVGTCRMGTDPMAAVDPRLRVHGVPGLWVADASVMPTLTNGNTHAPTMMIAEKAAHMMLEDREP
>c322
KYDCIIVGGGSAGAVLATRLSENPALDILLLEAGSKDTNPLIHIPFGLSLLSRFEGIGWGYHTAPQKEMYDRELFWPRGKTLGGSSSVNAMCYIRGQKEDYDRWANEEGAEGWSFDDVLPYFKRSENFEEGADEYHGTGGPLNVSKLRHTSVLSDAFVNSASIAGYQQLDDFNRDDREGLGYYHVTQANGQRCSTAKGYLAQAKHRNNLTVLTRVAAEKVLLKEGRAIGVQVREKGVVNRYFAKSEVILCGGAINSPQLLMLSGIGPRAELEEKGIFVQQDLPGVGQNLQDHLDAIVQYTCKAREGYAVALGALPSYVKATTDYAFRRKGIFSSNIAEAGGFVSSSLATQGPDIQFHFLPAILNDHGRQLAFGYGYGLHVCCLYPKSRGTISLQSNHPADQALIDPNYLTAEEDQQVMIEGVRIARKLLSAPDFDKFQGSELYPGVEAQTDEEILEFLRERAETIYHPIGTCKMGSDDDEMAVVDTQLRVRGIAGLRVVDASVMPSLIGGNTNAPTVMIAERAAEFI
>c323
KYDYIVAGGGTAGCVLANRLSQDGSKRVLVLEAGTADYKHPYVKIPAGIVKLFKSRLDWDYTSSAGAEPGLTNRGVYLCRGKVLGGSSCANVMLYHRGTEEDYDAWGVQGWGGAEVLDFFKKSEHFEGGESKYHGTGGHYHVSETPYQNTLCKSFLEVCAQMGLTNNPDFNDWGRPQEGYGRFHVAQSKGERCSAASGYLAAAEGRGNLQVLSEVLISKVTMDGGKARGVAFRDKSGQNVVAELADGGEVIMASGAIGSPQLLMLSGIGPAGHLKEQGIKPTVDLPGVGQNLQDHPAAVVSYKTEQKLSVTDEIRAGGFPSPTAFLKWMFFRNGPLTSPGCDHGGFFQTHGGKDASAPDLQVRFVPAHASAPDGVATYTQFGSNWGGSQFQSGFSFQPIAVRPQSRGSLHLASADPAEKPVISTGYLTDNSDLQTLISGIKLARDMASQGPLAALSDSETFPGKAIQSDDDIASYIRSTAHSANAIVGTCAMGTDPKSGAVVNPSLQVFGVPNLRVVDASVIPKIPGGQTAGPVVMIAEKAANII
>c324
LAARLALAGHKTLLIEAGDDQGANINYTVPAYNARVSEDPNLAWNFFVRHYADESRQARDYKTTYETPDGGQYIGLTPPEGSKMKGILYPRTGTLGGCTAHNALIAVYPHQSDFDNIATLTGDSSWSADNMRKYFVKLEDNQYLLPGAEGHGYDGWLGTSYSPIDIVVSDPQLLSLVGGAAFALGNETNSVINLDTLVAGDANADSAERDSKPALYQIPLSTTDGKRTGSREFVLAVRDAKTTNGTKMYPLDVRLNAHVTKVTFDQTVSPPRANGVEFLDGQYLYKASPKTAGARGTPGSVTASREVIVAGGTYNSPQLLKLSGVGPAAELKKFDIPVVVDLPGVGTNLQDHYEINVQGKVPTNFTALEGCTFDSSPSDACLDRWNAPVAGNRGIYASPGLGATMFYKSTATERDEYDVFVFGGPVNFRGYFPGYSFNATSEHDWFTWAILKAHPRNNAGTVMLRSADPLDVPEITYNYFDTGSGDYEADITALSEAVNLARDAIKRQVVPVEEVLPGADVTSAEGIAEYAKDTAWGHHASSTCPIGADDDPLAVLDSSFRVRGTAGLRVVDASVFPRIPGTFTAVSTYMVAEKAA
>c325
LAAVMFFALFNFYFTVGFYAVGVFIASCIFKLLFYAAYLNDLHSTPLDSVYDYIIVGSGTAGSWIASRIPSNNVLVLEAGPDRNALMDVPLFLPLLQGTQYDWQYVTEPQAEACWAMKENRSRWPMGKRKEKKVHLDARLIPFNNRAFVSGKTVGGTHILNNMIHFKAERKDFTGWFGKAHDLDRFMEFFERDRWSHVERGYSTQLGHAIIDSAMLLGFGRDEFFQPLLTTRNGRRWTTAHEYESRGRLAHDRLTNSVVERIVLEKGVAKRLLVSSAGKLIELRASKGIILAAGTVGSAKLLLQSGIGPREELETVGVTPIINLPQVGKNLQDHIGTGSELLLIGKSLKLHPIDLVHPSNVLKFFSGNHHQSSLSFGGCEAVGYVSLGSNYTSDLQFMVLPAGLTSDGGVHLRNIVNLKDAVWKDYYEPLSRTGQHAVTVLPILLHPKSVGHIGLRSANGQDAPIINPNYLTSKEDVRDLVKGIRILQQLTQQPPARQLGLEFNPKPFPGCTTQPYDSDAYWECYVRSVTHTIYHPVGTCRMGGTSADSVVSSSDLRVHGVQNLFVADASVLPSLPSGNPNSVAMAIGE
>c326
LAINGQKVLLLEAGDDQGETPQQSIPAFYPAASEYDPMSWDFFVRHYPDDAREALNQKATYTTPEGETYIGLDPPAGSTLKGIWYPRTGTLGGCATHNAMITVYPHDKDWSLIQSLTGDSSWAPENMRQYFERVERNTYLTNSTDSTADGHGFDGWLGTDEASLGLIADDSQMLSMVSAANSFGGTNPTVNVTDAESLANISPFDLNTAYPNRDSTEGLYRIPLHVSDGRRSSPRDFLLATANALNPDGSKKYQLDIRTHTFVTKVRFEENPGAVPRAVGVDFLVGESLYAADPRNTGNNTGTPGTVNATREVILSAGVFNTPQILKLSGVGPKTELEEFNISVVVDLPGVGTNLQDHYEISTVSKFETDFELLEGCTFLSTGPTDPCYVRYTTNATEKGPYATNLLPSAVLLKSSVAESDRDMFIFGGPVMFRGYFQGYTNAAIADTKHWSWVTLQAHQNNHAGTVTLNSANPLDVPSINFNFFDAGTTADGADAHDLAPMVEGINWSRKVSDSVSGKYSFTEEQPGADIPTTEQIQDFVKNQAWGHHASCSAPIGADDDGLAVLDSHFRVRGVEGLRVVDASVFPKIPGFFPVAAIFMISEKAA
>c327
LAINGQKVLLLEAGDDQGETPQQSIPAFYPAASEYDPMSWDFFVRHYPDDAREALNQKATYTTPEGETYIGLDPPAGSTLKGIWYPRTGTLGGCATHNAMITVYPHDKDWSLIQSLTGDSSWAPENMRQYFERVERNTYLTNSTDSTADGHGFDGWLGTDEASLGLIADDSQMLSMVSAANSFGGTNPTVNVTDAESLANISPFDLNTAYPNRDSTEGLYRIPLHVSDGRRSSPRDFLLATANALNPDGSKKYQLDIRTHTFVTKVRFEENPGAVPRAVGVDFLVGESLYAADPRNTGNNTGTPGTVNATREVILSAGVFNTPQILKLSGVGPKTELEEFNISVVVDLPGVGTNLQDHYEISTVSKFETDFELLEGCTFLSTGPTDPCYVRYTTNATEKGPYATNLLPSAVLLKSSVAESDRDMFIFGGPVMFRGYFQGYTNAAIADTKHWSWVTLQAHQNNHAGTVTLNSANPLDVPSINFNFFDAGTTADGADAHDLAPMVEGINWSRKVSDSVSGKYSFTEEQPGADITTTEQIQDFVKNQAWGHHASCSAPIGADDDGLAVLDSHFRVRGVEGLRVVDASVFPKIPGFFPVAAIFMISEKAA
>c328
LALEPFDFEPRADVPLSGWPIRAGDLKPYEAGAAAMLRTIEIGQTRRLFDGDLDAITQRWSTQRKPHQVTSVEILRFGSFYRAALEQSAAIDVVLNANVTGLSVDGATGRITAAQVQGYDGASAAVQADRFVLAMGGIENSRFLLLLNERNADRFGNQGGMVGRCFMEHPLFYNGAYFVTRRLFSHYRYWGAEKFLRAERGVLALSPSPAFMRRAGTLNCVVHLSNVQRTALDPSDTEGAAFVQGLRFDQDYFFIGDTFSVGEQAPNPASRIVLVEGRDRFGLRKAGLDWQLSPIDGQTLRTATLEVARMLIRTGLGRMKMPPEVWNNGADLPYDLSYHHMGGARMSDTPETGVVNRDCRVHGAPNLYVAGAGVFCTSGAANPTFT
>c329
LALWQTERMGLFTDSPASMIGFLRIPADAPIWNQFEDPSAGTFYILFAPDAYSPPPAPGSGNYFTLNTAVVTPDSVGSVKLNSSNPFAFPLIDPGFFTAPFDVQAMLYAIKAARGFMDSAPWAGIALKRIGIVGQAESDEDIIAAARATARTIYHPVSTARMSPKNADWGVVDPQLCVKGANGLRIVDASVFVRDKLALSLQRF
>c330
LARIAQWIHSAADPNARPWRAKDFEGLCYTPVSTCSRERVGSRERLLDVAAKHGDRLHIELNALATRVLFDADGAACGVEYLKGSRLYKAHCNASPAQGERREVRARREVILCGGVFNTPQLLMLSGIGPAEQLRRHGIQVRVD
>c331
LAVQDVPYQNLLSKAFLKAAGQMGFRANSDFNDWSAPQEGFGRYKVMQRDGERCSAQSSFLALAKGRTNLCVRTGAHVTRLVATGGTAEPRVTGVEFTFTDGSEVHMVRLAPGGEALLCAGSIQSPQLLMLSGIGPCAHLEEKGIRVVKDLPGVGEGLQDHPAVLVAYESTKKVCLTDDIKLFGTGMTNPLTTARWLLARKGPLTSVACDHGGFFRTTPDLEQPDLQVRFVPALAQSPSGMSTLVKYSQGGSMKSGFSTQLIACRPRSSGRVRLRDSHHHTKPLLEDVYLSAEGDDDVKALREGIKLARKLVDTEAFDNFRGKEVYPGAAVRTNEQIDAYIRSSIHSANALTSSCRMGAASDPMAVLDPELRVRGVRGLRVVDASAMPQIIGGQTCAPTLMLAEKAADMILSK
>c332
LAYALALAGIDALVLERGPRHARAEFVHDELAGQQVRGFIPDPLRDPHIVATHDNPAGIASTLGWTALGAGGGTLRWSGYFYRFHPIDFRMASAFPSDPNLADWPIDYPSLAPYYRQAERLVGTSGERDRSRFAPPVDEPLPMPPRQQNSWAARLRAAGDADGLALHATPRAINSIAYGGRPACAYCQRCGSYGCPNGARGGSHETLLAAAERTGRVRILSEHRALEIETDSRGRAVAAIVAGPDGDRLRIRADVVCLACSTVETARLLLLSRSARFPNGLGNSTGQVGRHLQFHGVSMLRAYFPKVDGPRHEPGRVLDLSSSAHYLLDDDVSSPRKGGLLRFALTPPSPILDAKHLAMSGPRVRFGDELLSAYRERHLERSAVEVEAFHDYFPNPGTRVELDPERLDSLGQPCARIWLDPSPRHAEIGDSLLTAAERVLQRAGADFIERSVVGGTSSYLVYGACRAGHSPEHSVVDGDGRCHEIDNLYVVDGSYMPTSGGVAPTLTLIANALRIGERLAARLRGHCEPGMAGG
>c333
LCGSPVQRILFTEDGVKAAGVHFTNGGVDHVAQLAPGGEVLLTGGAIHSPQLLMLSGLGPAAHLQEHGIKIVKDLPGVGENFQDHPAAVVSYQCPDAKRGISISSEMRIFGLPNPIPMLKWFLFRSGPLTSPACDHGGFFRTAAASEEDAKSPDLQMRFLAARAITADGMSTSCDFQKTAKHPDGFSFQSVAVRPHSRGRVRLASANPSDKPTIEGNYLTDARDMATLREGLRLSRKIAKQPAFAEYLGFEVFPGPQFQTDEQLDAYIASTVHTANAIVGTCRMGQAEDPQAVCDPKMRVHGMEGLRVCDSSVMPKMPGAQTGATTVMIAERAADMIRGIYLPRGKVLGGSSALNVLLYNRGDANDFNLWEEKFGCQGWKADDVLPYFKRTEDNQTGLAKSDPKHHSTGGEWSVDHVRYQNPLSKRFLEACKQMGLPGNNDFNSWGHKQEGAGRFVVRRTWDYIVVGGGTAGCVIANRLTAAGKRVLVLEAG
>c334
LCKVLRVDGHKVYADIIPPEFGLEASKYKTGKYCIKADKIIFSAGAIHSTTLLMKSFGAEFLPAIGRYFTCHPALILVGQHANQINANGGHPKSFYCDEFHHTNKFLLETCYYFPFTLAKNLAGFGAEVDELLHLYKNLQMILVLAIDAAEAHNRVKLGANGKPMVDYTFNAKTISSFVAAIQASTKIFFAAGAKKVHAPSMTKFFITPDEAPYIDQLITKNNFKLGKISVAAAHLMGGCRMGSDKTTSVTNEWGKIHGFEDYYVADASLFPKASEVNPYLTIMSLANRVAEGIKRDLGEDV
>c335
LDKAYGLVVIFGKPFSRGTVSLASNSPEDTAIIDPAYYSDPRDLQTMTNGVLRMMEISKQPQLMDWGNTVMSSGADAEDLEKLHEYIFKNTMTCYHYVGTCSMGDGDDYPVDTELRLKGTENIRIGDASTIPVVPVSATNAPTMMLAYRAVELILQN
>c336
LEFFDDQNGGFEDGYFPLTVSNLEDRRVSAAIAYLDAATRARPNLTILSNAVAKRIRFEGRRAVGVEIDRQGAEEFHGGREIVVSAGASHSPALLMRSGVGPGLHLRDMGIDVVAGLEGVGQNLQDHPGVPTMVYMTHRARHGANPGPALQVGARYSSGIDGCGPNDMFICAIGRAAWHSAGRRLGSMSTWINKPYSRGQLRLRSADWREEPEVELNMLSDPRDLARMKLAMQRVAELFEYAPLKAATRDAFSTNFNRRAQMVAAVTPRNRFLTALASVLMDGPGPLRRAVIRDVMLGRDINRVVREGDAAIEEHVMRYVISIRHISCTCRMGDEGDPTAVTGPDGRVHGVGGLRVADASVFPAVPRANTNIPTIMTAEKIADAALLS
>c337
LELRVDGQLRQVKAKAEVILCAGAFGSPQILLNSGIGPAADLQAAGIPVRHALPGVGRNLQDHMYIHHTFGCDAPSSLNADFRGLRAILHGMRYLLTKQGPLTTGASQACVFMRSSEAVNRPDLQICFRPVSWSFTPQGTMEIGRRPELTVSVCNLRPHSRGRVTVAGDDPFAAPRIHANYLSTDWDRDVAVKAVRHVRSIFEHAPLKERVSAEIAPGPKVRSDAEILDYVRNTAQSMHHWAGTCKMGQDPDAVVDAQLRVHGVRGLRVADCSVLPNIVSANTNAVSFVVGEKAATLLQ
>c338
LGTPGWAWAYVEPVFRRLPLRIEPQISPNPISLAFLDALQDEGIPLERRLSGPRGKECGLFRTTMHQGRRWSASRAYLQGNMPPGLTLRLDTLVRRVVVEEGRATGVEVVTEGEVSTLQARGAVILAGGAINSPQLLLLSGIGPGEELREMGIPVRSDVPGVGRNLQDHLSVGISWKATRKVTLDGADTFLNLLRWLLFRRGPLTSPVAEAAAFLPDDGSPDPRPMLELILGPVWFANHGFDRRPGSHYTMGAVLLHPESRGRITLASPDPLAAPHIDPACLTAACDAERLLAGLRRIRHIGAHKSFAPWRGNEVFPGPGATTDEDLLNHLRAHAQSLYHPVGSCRMGPASDPMAVVDPELRVR
>c339
LINPTDKRVYGVEFRRNGRRQIVTAKKEVILSAGAINSPQIMMLSGIGPKEHLSSIGIPVIQNLKVGENLQDHVAMGGLTFLVDKPISIVQDRFEAFGMTMYYIMKEKGPMSTLGGVEGLGFVNTKYANRSWPDIQFHMAPASINSDNGARVKNCLGLKESLYKAVYEPIANKDAWTIMPLLLRPKSTGWVRLKSKNPFHYPLINANYFDDPFDVQTLAEGAKIAVEISRSPAFKQFNSKVHSVPFPNCRKYPFESDAYWECHMRT
>c340
LINVALMKVTSRGTVKLNPVDALLDPVVDFDMLSTDDDVEALTAGVGVLLDLLEGAGMRAIANEFYIDDRGTTVADIADSPDAVRSWLVSSTGDYVHAAGTCAMGDPRSEFTVVGPDARVVGVDGLRVCDASIFPCVPRANTHFPVMMAAELVADRW
>c341
LKPARGRQNLTVLTGAAVRDVKITGNRADKVSYTHRGGPRTVQVRREIILSGGAINSPQILLRSGIGPEDHLQNAGIKTQVKLAGVGRNLQDHPTMVLQFKSRKSFEMHRLNNPLKKLGVGLEWLSRRKGIATSHIWEAGGLVRSHDNAARPDLQYHFGPTGFEEVGNSFRVTQGFSFHIDLLYPESAGRVELDPKNHFGKPMILFNYMAAAADMTGMMNGVKKARDITNSAAFKDLNGGETGPMAQARTDDEIKAVIADECATDYHPSCTCRMGYDDDAVVDEWGRVHGVEGLRVVDASIMPRVVGGNLNAPTQMIASRIADHIIGVAQLAPEQASYSFQETEIGNKTAHRMTG
>c342
LLMLSGVGPSAHLRQLGIPVLADLPVGSNLQDHYGSMALVGITIPEVKKPVSIREERFLNIPSMLQYVANGAGPLTSLGGVEGLAWINTKFANRSEDRPDLEIMFVSGSIVADSGTVKTVQGVTDRVFDNLYRPLLGRDTFSFLLQVTRPTSRGFVKLRSRNPFDKPIFEAGYFNHPHDIKVIVEGMKFCLAMTKTRAFRKYGGRMWEGRKMPGCEGLVLWSDAYLECLARQYTNTIYHHSGSAKMGPARDPTAVVDPRLRVHGIKGLRVIDASIFPTVPSGNTNAPTIMVAEKASDLI
>c343
LLSQWEANRTGVYANSIGPIAGNWKVSAYEDPSSGPRSGNVMSIFVPSYQAIATAVLPPSTGRFFSVLTSVISPTSRGTVKLSSSNPFDPPLIDYGLYTTDFDINAQVEIMKATQDLLSQPQFQGIVEGPFGGLANATTDQEKAAFARANSRVFNHPSCTATMGSDGVVDSRLKVKGINGLRVVDASVS
>c344
LMDSTGAGLGATIPALKNRPRYNEDGHTANHLFIPWWGHKEQHRLNFPRGYHFELGTGFREPGAWISGDFSGYGESLKDEAKANYGASVYFALRGEMLPNDNCYMDIDPNVTDKWGIPVARFHWQWSEHELNQVAHGLQTAKTLLETMGATVGELPPPEQAIAKGGEIIHEVGTARMGDSPSDSVTNQWGQTWDCPNLFVMDGGVFASNPHKNCTLTIMTLAMRNANWLAGQIQQGAL
>c345
LMGTFKALSNIDPATGTRCNAATAYLLPVLDRPNLKVLTEAPVTRLVTETVGGELVTTAVEFERGGTVHRVLVGKEAILCAGTIRSPQILELSGIGDRSILEPLGTTVSKHLPSVGQNLQDHVIFVGFVQVRVRVRLVRTPADLTDDYQAASRRPLVVVHHRLHVSAAAGVLGPLREHPQDYLKILIAEKADQFPPGLMEQYEVLYENLAKSDFPAIELVAFPFNASHLTTDIVAGSIPSYPVLMPSIQHPSSRGTVHITSPDPKKVPSIDPRYLEEEADLDVLVDIFKFTRKMSQMAPFQTVVGAEIAPGSKVQTDEDLRADPQCTQPTDLCGTCSMLPQDKGGVVDSKLKALDMQVYGTSNVRVVDMSIVPLIPSIHTQRTYSRLVCI
>c346
LNISILPGKYLGKASLNIMEAGNRLGHEWEPMPKFINLNKVKNNKISGAKTSIGENFGERWTALEYIEEAVKNGAKLLTSTECTELIVENGVIKGVKAKTKKGRENKYFAKKVVLSGGGIPSPVLLQKAGIKNAGKGCIIDPTILVYGISKNKLAVSSLLEGSLQIIVQFLFALVLLIFDTRLNIISNNIKVIIGLGILACLTVLIPRVFNRIVSVAYKLVKHKDFSDEHTATGKTIAKGFGLYVVGSLISSLSLFFVAKALYPELGYEHIFFVMGASTLAGAVSMVAIFAPSGIGVREGIQLALLSIIMPTEIALVITIVTRLWSVVIDLVFFGISALLYKYKEIK
>c347
LNLLLAILLALMTLPSLVNSQANPILDTGADLIANGALPPYDKFPESDISYQTFDFIVVGAGPAGCTVASRLSEISRFSVLLLEAGPEESFIGETPLINEAMITSPTYNWGYKMEKEDGVCRGGVGGRCDWPNGKGVGGGTLVNAMVWTRGDPTDYDKWAAL
>c348
LPSSWDNQNNQLFQAGAKKLGIPIKRLKINTKNCQQQGFCNFGCTSGAKQGALEVQIPRLLNRGVKIFCNAEATSVEEHTVNVLIKDNSKNGLENTIKAGQYQLKAKKIILAAGVLNTPVILLKSAKKLNLNTKNIGRFITLHPAFNVNGIYNKPITNNTGFPKTVYSDYFSDTDNFILETSFYSPGITAKNNPGYGELHQELMKDYSQMMSILILAHDKAEFKNRITLNRKGERQLEYTVSNDSKTALIKALQVATKLFFAAGCKSVSIPACQKSP
>c349
LQMFLTCPSHRTDSGTGIDLHVFPLGPETDDTGQATLTLFVGLLRPHSGGRLLLRSTDPKDSPHIDPGFLTDPRDAPRLINGMHLARRLAHTPTCRMGPPDDPDAVVSPTGAVHGIDHLHVIDASIMPTPPTANPNLTTMAIAEHRATTLP
>c350
LQRRVGVPRSRGGEGEPGGAVRGQDVVAELAEGGEVIMASGAIGTPQVLMLSGIGPGAHLRDMGIGTAVDLPGVGQNLQDHPAAVVSYKTEKKLSVTDEIRTGGFPSPMAFLRWMMFRNGPLTTPGCDHGGFFQTREGADAGAPDLQVRFVPAHASAPDGVATYTKFGSNWGGAQFDSGFSFQPIAVRPQSRGSLRLASADPAAKPVISTGYLTDPADLQTLISGVRLARDMAAQGPLAALSDSETYPGKAVQTDEDLVEYLRSTAHSANAVVGTCAMGADPGAGAVVDSSLRVFGVPNLRVVDASVIPKLPGGQTAAPVVMIAEKAAEMILG
>c351
LQVQESPYRTPLATAFVQAGVELGYPHLDCNGAQQTGFMLAQGTVRRGSRCSTNKAFLRPVRHRPNLHIAQHSRAMEILMEGRRAVGVRFLRKDKIYDVYANREVLLSAGAISSPQILMLSGIGPADHLRSLGIEVKADLAGVGGNLQDHIATGGLVFHVEPPFGLVQPRLYSLATLVQWIFQRSGPMTILGGIEGLSWVNTKYQNASQDWPDVQYHFGAGSPATDGGILRQAHGLADHVWYEFFEPIKDLDAFTLWPTLLRPRSRGFIRLRSTDPFDRPIIQPNYLSDPHDVNVMIEGVKIGLALAETEAFRKLGAKFYSRPFPGCTHLKTDEYWSCFVRQYTATFYHSVGTAKMGPASDPLAVVDARLRVHGLQGLRVVDTSIMPDLVNGNTNAPTIMIGEKAADMI
>c352
LREHRMAMVQFRINKPISLNREFGGLGLVKNILQYMISRKGLMATGSHDVVAFVRSEQHLTRPDIELVVAPFSLKQTGMSMEPQEGNVEFEEQHGMQIFGYQLRPESQGSVMISSADPAADPVIKSGYFSHETDRKMSFQVLKKIRELAAQPPLVDLIIEETSPGHEVSSADAILKFHSESGGPVAHPAGTCKMGNDEMAVVDNRLKVHGVDGLRVIDCSIMPTLVSAHTNAATMALAWRGAQLIEEDWRGA
>c353
LRFAGVEPRIVSDGIGRNLHDHPNVPLFFLSRHQVDCIYPQIYSFYRTLAQVPLAEGQSDTCYVFWPAPSAMKEAVQRMLPGKVLPPRLYAGPGKEVLRRAVGAVFSTKLAERAVDHLYGIVVILGKPRSRGSVRLAGPSMDLEAIVDPAYLSDPQDLQTMVEGVRFARSLARAGALESWTRAELLPGPLVRDDEAIARFVEKQAITTYHFAGTCRMGESEAHPTTPKLRLRGTHNVRIADASAIPETPVSALQAPSMLVGHRAATYVLEDMRGA
>c354
LRSFQAIENHELGPGDSRGVDGPLHITISPDHLEISDRFVSAAGLLGVRRVSDLNHPDQEGIAYAPRTIYKGRRESAARAFLRPARGRPNLQIETGVTVERILFEERRTRGVSAVRNGNRVKFETSGEVIVSAGALASPVLLQRSGIGPAAHLKTLGVEVIYDSPRIGQNLLEHRLLMMHYRLNRPLSVNCELLGLRLIKNGLRYVFGQSGPLAAGSYDVGAFIKTRADLDRPDVEILMAPYGYSFDENDQPIVLREHSFHMFGYPLRSRSQGSILIKSADTTIPARIRPNYLSNAYDRDVTVAMFQFMRRLVAQSPLAEVISEEIAPGAAVETDEDIIAAFRTRGHSGYHACGTVSMGGPDAPLDEQLRVRGIDGLRVVDGSVMPTMVSANTNGPIMAIGWRAAELIRQGCNR
>c355
LRSVLLDGSRPGAADKVASEQWDYIIAGGGTAGCVLANRLMRAGKRVLVLEAGSADYENRLIRIPVGVLYLFASKFDWTFFTKDLPKVFLCRGRVLGGSSALNVMLYHRGDAKDYNLWETEFGCKGWAAEQVLPYFKCTEDGRAGLAQKDPKHHGVGGEWKVDHVSYQNELSATFLDACKEAGLPANDDFNNWDRPQEGAGRFHVSQKDGSRCSAASALLAPALRESSSSASKPLRVLCNAHTSKVTFQGKAATGVSFRTAAGEQREARLAPGGEVIVAGGALHSPQILMLSGIGPRNHLKEKGIDVIADLPGVGENFQDHPAANVSYEVPPARRGISPTSKCIYVFGKRIPSPLWGVQWLLFGSGPLTSPGCDHGCFFKTSVAAKEASPDVQMRFLPARAVTADGMNSFTTFRNLKKSQPDGFSFQSVAIRPHSRGCVRLASADPSELPVVEGGYLSNPKDLESLREGMRFSRRLAKQPVFAGYLGPEVFPGEEVQTDEQLNSYIRTNVHTANAIVGTCRMGAAEDKMAVCDPEMKVLGGLTNLRICDASVMPKMPGGQTGAPVVMIAERLAAILTG
>c356
LRYTATGSRARNDMMISQAYPAGPPYGDVLEPEGVRLTCSLELPVSSGELMLTSADPHEKPHLDYRYLEDPWDRQRMREAVRLCVRLLQHQAYREVIQERINLTGQDLATDESLDAWLLQNLTTAIHMSGTCKMGPASDPMAVVNQYCQVHGLDGLRVVDTSVTPDVVRANTNATAIMIGERVADWFK
>c357
LSARDGQPERAVNAPVVVVGAGTLGSTEIMLRSQENGLALSRHLGEQFSGNGDVIAFGYNNDVEIDGIGIGQRKAPDGYQVGPVIAGLIDMRNTSDLADAMVIQEGAIPSLLAPLLPAMMAGGSPMFGDDTDEGDSLEEAKRSAKSLFAGAYTGAVRNTQTFLVMAHDTASGKIEIKGDRINVDWPDAGKAKVYEKISATLRAATAATGGTFINNPMWAKSLGRNLVSVHPLGGCCMGDDVDNGVVDHKNRAFASSGEVLDGLFVMDGSAMSRSLGVNPSLTITAISERAMIHFAKDHGLELDTTPANAALV
>c358
LSATFLRGCADVGFPANDDFNNWARDQTGYGRYQVNERNGERSSTSADFLDPVKARKNLAVMSNTHVNKITFSGDQADGIEIAGGRTVKLKTGGEVLLTLSIVHXAINSPQLLMLSGIGPKGHLEDKGIPVVKDVPGVGQNMQDHPAAIISYKCKEGNEGVSVTSKIRLRGTTLTNPKVILQWLFKREGPLTSTGCDQAVIMSGCDHGGFFKTEESLSSPDLQMRFISAQSLTADGMGTYTKFRESSQLKDGFSVQSIXAARPRXXXXXXXCSASXTGRVMLKSNNPAEKPAIHTGYFSDDSKKDIATIREGIKLSRKIVMTQPFDKFRGEEVFPGPSIQSDADIEDYIRKSVHTSNAIVGTCRMGHDADSEAVVDPHLKVRGVKNLRVIDXXXXASVMPTIPGGQTGAPTVMIAEKAADFL
>c359
LSEDPSKKVLVLEAGDRGPNSPLVKIPVAILKLFKSAYDWNFATKPSEAVADRSLYVCRGKGLGGSSLTNVMLYNRGSAGDYDAWAAACGDDSWGAEEMLGYFKKAEDCLVPAHRANHYHGVGGPYASSHVPYTNEMSTAFVESAVEDGGVRNGDFNDWSTSQVGFGRFAVSQRKGARVDAATAYLPRKVRRRKNLDVVRGAALSGVTWNANKATGVEFAFGGVSGIACGGEVILSGGAVHSPQMLMLSGVGAKAQLEEFGIPVVADRPGVGKNLQDHPACLVSWRGSAKAQGKSHSTQLRIPGTTKTSPKALLQWLFLGRGPLASPGCDHGGFAKVGAGDGDCDVQFRFLATKSITPDGMSTISDSYEAAVDHPDGLTIQTIVARPKSRAGEVKLASRDPAAKPVISNAYLDDEADVMTMVKALQKARSIASRAPLSAYAGNEEFPGEDVADERALAAYVRNTAHTANAVVGTCKMGESSDALAVVDNHLKVIGVSNLRVVDASVMPTLPGGQTAASTIALAEKAADLI
>c360
LSGGSVTLNSTDLNPFTPPLIDIACLQTTFDSLAIRAAIKIVLKFTSAPAWDDYILGPFTDLAHTLEPGSSDPDELNKLLDEYIRNTTTTTEHVVGTASMSVRNASFGVIHLDLLVKEVEGLRIVDASILPYVPSAHTRLLCISLRSAPQTWLRLDG
>c361
LSGVGENLRDHVSAGYLFLSPQVNSVPEHRLSAYIMTKSREGLTTPDMQTFLWGPSTEESLKTFLPEVNLPAENLFFLLSTLNKPVSKGSVKISSTDPTSKPIVSPNYLNEVSDIQALISAGKALHSMLSSMFAGGYTPLAPFPDSDAEIEALVRSSASSLYHYCGTCAMGKAGEAVVDPELKVNGISKLRVVDASVMPTIPRCNTMAPCVLIGEMATEFILKKSEIS
>c362
LSGVGPRKLLEGLGIECVVDLPGVGRNFQDQPTIYMQFSYGNYTFPTPDWMFSNASWAAEQLDIYNKNRTGPITIPYLGGSSVAFLPLKNITPSYPSILATTALTNLSSIFPSTIHPSILAGYKAQHDLLLNLYASPDAAVAEIAWEGGNTIPLAMIRPFSRGAIEITTTDPFHPPTIDFGTFAHPTDILTFIASIRKLREWIFSPAMQALGAVETFPGASVSTDAEIEAAIRNAATSSWQHPSSSCAMMKKEWGGVVDAEVRVYGVKGLRVVDASVFPMAVAGHTSSSVYAVAEKAADIIKLSWG
>c363
LVLEAGSGDYNHPMVKIPAGVLKLFQGDKDWNFTSTNETKTSGRGIYLCRGKVLGGSSALNVLLYTRGDKHDYDIWETKYGCVNWGSSDVLPLFKRTEDDLTGCASENPKHHATGGEWAVEHVRYQNPLSKLFLKACEQAGLPLNNDFNDWSKKQEGAGRFPISSRKGVRCHAASALLAPAQADAKRQLKVLTGAYVRKIILDGKVTQGVQFSADGMIHVARLASGGEVLLTGGALHSPQVLMLSGIGPKTHLEEHGIEAIQNLTGVGENLQDHPAAVVSFECPEQQRGISVSSKIRIPHTTLPHPAPLLEWLFQKTGPLCSTGCDHGGFFRTSAAPQDSPSCDLQMRFLAARAVTADGMGSFTKFKHITNHPDGFSFQSIAVRPKSRGRVTLASADPEMKPVVTTNYLTREEDLATIREGIRLGRELAKQPAFKDHLGPEVFPGSHVQTDKELNAYISDSVHTANALVGSCRMGRIDDPLAVVDANMRVIGVTGLRVCDSSVMPELPGAQTGACTVMIAERAA
>c364
LYNRGSARDYDGWGVPGWGSEEVLEYFKKSESNNAVSNDKFHGMAGPYEVDSVQYTNPLIDTFLGASVKAGYSRNSDFNDWDRGQEGVGPFHVAQRNGVRSSAASAYLSQVEKDNRLEVVTGAHVKKLAIDAGKKEARGVHYAKDGMEVFTSIKEGGEVILAAGSVGSPHILMLSGIGPRQHLEEHGIDCVADLPVGENLQDHPAAVVSYTVDQKVSVTDEFKLFGISNIPNPWPMIKYLLTGTGPMTSVGCDYGGFFKTSESKEDPDLQMRFIGALAQSPLGISNYKEYARKWLSWPSGFTFQNICVRPKSKGYVRLQSANYGDKPVISTGYLSSEEDIESIRNGIKLSRKLGASEEFKKYNPVELYPGPEVQTDEEIDEYIRNSAHSGNALVGSCRMGVDSKTAVVDPELRVMGFKSLRVIDSSVMPVLPGGQTCSSTLMIAEKGADLL
>c365
MAAAEGEFDALVIGSGLSGGMAAKELTERGFKVLMIERGRHVTHGDDYVGEDRPPWDFRFRGLGDRQSYARDYPVQRQARAFGEGSDQFFVRDSEHPYETDANHPFAWIRGYHLGGRSITWGRATPRLAPANFEEPLHDGHGIDWAIRYDDIAPWYSHVERFIGVCGEKAGLDMVPDGEFLPPMPLNCVEQHVQKVLAERFPGRHLIPERSAILSQNHNDRAACHYCGPCYKGCSTASYYSSIGVSIPVAQATGLLTTVTDAIVAGIDYDPATKRATGVRVIDARTREKRTYRGRMIFMNASTVGTTKILLQSMSEAWPRGLGNDNDTLGRYLLDHAMGAYVAARMPGFLDSQPVGNRPNGIYIPRFANLGADKADYLRGFGFQGSAWRANWVRGGDGDELGAELKAAMRAPGPWYMHLVGYGETLPRAENRITLSATKQDAWGMPLADIRFEWSDNEYKLVKAAAEAGAEMLKAAGGEIVSYVDKPSPGGLAVHEMGGARMGRDPKTSIVNAHNQMHAVANVFVTDGACMPATGNANPSLTYMALTARAAEYAAGLAKTGVI
>c366
MAAAGTLGSGALASAASKTSGKVAGNPHEFDVIVVGGGSGGAVVASRLSENPQLRVLLIEAGPAFGAKHFPPILAKREMVGGGDYVWEKQASTGTDHTSQHLRAKVLGGGSAINAAAFVRAPKFDFDRWARQGLKGWSYDEVLPYFKKMESANYGADAYHGRQGPMPVRLPRLDQLTPASEAFYHASVAHGLRANDDINGADPSGVAVYPVNVVDGIRMNTAMTYLRPEVRQRPNLEILGNRIVDKVLLENKQVVGVQLDDGGRFSAANVFLCAGSAGSPAVLMRSGVGPADDLKALEIPLVIDLPVGRNLHEQPTNGILVSCDPKLGSYPPIGTTVWTRSSLAEAGELDIFISNNHFVNPELFPTKAGFQLFFAVGRPYARGSLKLASRDPRATPKIDLNLLGDERDLLRMIELCKLSREILAETPLKAISKGEAPRSRGGKLALNEAEIREEQKSTVMTNLHLSSTAPMGAESNPLAVLDAQGKVLGLEGLYVADASVFPDVPSQATNPDVIMAAEYLSALFINKRA
>c367
MAAAKTYDYIVVGGGSAGCVAASRLVAEFGARVLLLEAGGDYKDWILKAPAGFSQILGGTKYFTQHFTVPQEQLGGRVQMIPQGKVLGGGSSINAQAYMRGRAADYDIWGEMTGSDLWSWRKILPHFMRLEGNQKFNNDFHGASGPLRVSDPGFICEMSHKYVRTLQGMGVAYTPDFNNGAPAGVGYPQVTTGGGRRCSAVDAFITPIRGNPNLEIVTGARVERIAIERGRAVGVDYSIAGSRLQARADGEVILAAGALASPQLLMLSGIGPADELGKLGIKVEADLAGVGNNLQDHCGAPIAAAAPGNYGYFRQDQGFRKIANGIEYLLLGRGRITTTGVEACSFHVPEDGSGDPVVQIWCVPKTSYIDEDVRGVPDIDGVTLHAVLMRPRATGWLRLRSADPRELPLVNPNYLGHPDDMRHLRDGMRVAREILAAGPLRDVVTKEILPGAGAADDAAIDEHMRRTVKTDYHPVGTCRMGREGDDDAVVTPELRVRGIDGLRVVDASVMPKIVTANTNAPTMALASRAISIMRGVD
>c368
MAAANGVNGHTASAIYSLDELQSHAFDYLIVGGGTAGLVLAARLTENPDVHVGVLEAGQNRLDDMLVSVPALFSKLLGTPDGTPDYDGMLELCIPIGQKGNHNKVHAQPRGKLLGGSSGINYMMYVRGSTADYDDWATLGEDQSWSASNLALYLRKPQTLDPMDTNIKERGFMPLVEAFHGTERPTCTSFNEWRVPFEDKFMNACDEVAGMKQRPKDTWSCDHIGFYLRWGQWTVLNKRAQEAINLKVLTEARACNVILKNKTAIGAMFTHVGGTHKVHAMREIVVSAGCRQFSSFLVSGPLMSSKRLESNASSQVLEWAPTFKITYRKTKSKCRRCDFEAGCADQSRFFAAPTTGKDGVTFAACLQYPASRGTVNIPSSDPLTQPAIDPAFLTHPADVAVLAAGLEFCQRVVETAHLTSQVARRLLPEPEVNVFHRSEAAKAIHEHVATEYHPCGSCAMGVVVDERLRVKGVKELRTVDGSVFPNHISGNLMASVYAVAEKAAGMIKEDAARD
>c369
MAAAPETFDYIVVGGGTSGPVAARRLAEYLPDAQILLLEAGPRHEDILASTMAMGWEGIHHSRWDWKYTSQPMRHANHRQIHLPRGRFLGGSSGANGTLMIRGVRNDYDRFAALGNDGWSWDDVLPFFKQSETFHPDPDQLPFDPAVHGDSGSLHTSFHPLAPISQRIVDSFLETGLEWKPNMFYTGDNQGVGHVPRTVYNGTRTSGADFVSGPNLPSNLTVRCNVQATRIILTDGVDGAKVATGVEARDDETGAPLLFHANAEIIVSCGAYNSPQLLMLSGIGPKHQLDRFNIPVQHDAPAVGENLQDHIITFNFFNVSQPKLTHDHLVFDEGALATAMGSYMTDKSGLMGRFPFGAFVFRRFDKELEANYPEWVEAKRRAGGKDPVGAENGMPHVEYFYSELYGGGPQHVHQPLPGESAFALITLLFNPQARGTVQLQSRNALFPPAIDHAYLSHPLDLAVLAEANRFGAETILKGSATKDVVSGAWPVSRTMPSTQDEWKEYVRQQAGTCYHASGTCAMGPSPDPSEVLPKGAVVDPRLRVYGVANLRVADASILPLVNTGHTQAPAYMIGEKLAYMVAQDAGATSTLPERLGSARASGKNGARTPAHL
>c370
MAAARGARSGASAAAAVLVSVLLVGGLVAGGAGAEIRRQKNVQVSLRAKWAGTPLLLEASELLSKEWKKLFWDFIDNWKELDKGSDCLTAKCCIQKIVEDARALLNEPLSTIFEFSLTLRSASPRLVLYRQLAEESLSSVPVDSLEQISGHGTEENFHEAGSPSPSGGTCCWVDTGNALLFNSADLRRWLEGLGKLATDSTERLELFDFDHVYPRSNITAPVAIFYGAVGTKCFKGLHAHLAEASKQGKVRYALRPVLPSGCQATSSFCGSIGAVDAVTLSGYGVELALKNMEYKAMDDTAIKKGVALEDPKTEDLSQEVRGFIFSKILERKPELNAEIMAFRDYLLSSTVPDTLEVWELKDLGHQTAQRILQASDPLQSMQEINQNFPSIVSSLSRMKLDNSIKDEIIANQRMVPPGKSLMALNGALINIEDLDLYLLMDMVHEELSLADQFSRLKANTTGGRGRGRGKKCVGLLASCTSNGITKKLRIEAKVSIAACGALMTPPLLRNSGLKNRHIGRNLHLHPVSMAWGYFPENKQDPPLPGKCYEGGIITTMHRVTERTIVETPALGPGAFAAMVPWESGRDMKERMRRYSRTAHAFALVRDRGDGYVDGEGRVRFTPSREDVDELRHGLRQVLRILVAAGAAEVGTHRSDGLRLRSQRLTLSSAD
>c371
MAAARRIIVVGAGVGGAVVARRLVAAGHQVTVIAETPVTAAPTSVDLHEASTVDRVASTPVQRVARGPLVPYPRGRGWAGSAAINAMVWDRPMDDVVPTRMVDTAEIGPVSAAVLAADPLAAPVRLSAIDGLRRTPADDLVDTVSVVAGEVSRVLIDAGSAAGVELADAQVLEADQVVLAAGALATPLILLRSGVPVWGRHLVDHPSVTIPLALRDGRGGDGAFPVVTVESRRRDGRILVVEDLGDPHHRTAGLVAALTSPTSAGTVGLDPETGAPVVAFDLLRGDDLHRLCTLVDAARALIDLPDVAALIDDIDSSMIGGADWVMHQVATTSPVYCHATSACAGTVGRHGRVRGLANVAVADASALLATPAGNPMVDVAQHAAGVAAAIAA
>c372
MAAAVNAAGLYGYTGSGDARHAVDIPRGRIIGGTTSVNSQMWVRGTTEDFGYWSTELGCESWSFDNVLPFYNSIENDVEFGHEEYHGDSGPITVRRHPRNVWREADVAWYDACVNHGFESCADVNAPGSLGGVGSLALNNVDRVRQSSALTFLAVARERANLTIRGDAEVR
>c373
MAAAVTAAAAGGGAVWLGSSSGRPNRSHYPAIVVGSGYGGGVTALRLGEAGVQTLILEKGRLWDTPDDDGRRFTRMLPADTRAGWFTDVPPSLVSSFDGVSVEEVARHVPSAQPVQAGICEKVVQGAHNVFRGVAVGGGSMVNAAIAAVPTPAQLREAFPDIDAQEFRDTYIRRARRQLRISYRDMDWFEHTPYFQYARVGRRYAEAAGYRVDYNGSAYSFDYLRQEEAGTVPRSALDFEQQFGNNHGRFGSVDQTYIHAALATGNVTLRPLTEVTAIRREPSGEYVVSIGEIDRWGNEVDVDEIGCDRLFLNAGVLGTVKLLLQARDTGALPDLNDEVGRGYGNNGDVMVAHHLSPADPAGTQQSLMGMINVDGRDDPDNPVYASIFSLPLPVETFALGYYVMVRTDDRADIRYDRATDSISIDWPEEFNDNVNARARQVFDRITAANGVDYRDDLFGGEVFAPNTVHPMGGCVRNRATDGFGRVLGYDGLYVNDASLLPGYLGCNPFLTITALAERNIEAILAGRR
>c374
MAADFIIVGAGSAGCVLADRLSENPANTVILLEAGGRDWSPLIHVPVGSGELVRKGLFGWSFRTEPEPHLDGRQMFWPRGKVLGGSSSINGQVYVRGNPSDFDGWAQMGNKGWSYADVLPYFVRSENNQDRQGPFHGQEGPLRVTRGTMDNPLFDAFVQAGLQAGHPLADDFNGASQDGFGRFDFNVYRGRRQSTAVAYLKRAKRRANLRVITNAEVDRLEIADGRVVAVRLNGPSGVKRIEARREVVLAAGAIGSPSLLMRSGIGPENEVRAAGIEVAHHLPGVGLNLQDHLQVYMLYGCKLPITVHGMIRLDRAALLMAQAVLLRSGPFAHFPVQGGAFTRSLPGLDVPDTQWHFGIALGPRRVRIPGIHRRGDLLDREGFALAPCQLRPHSRGRIGLRRDGDAIQPRIEANYLSSEFDRDFFRRVIREGRHIVEQRAFDTYRDVELAPGKAVQTDDEIDDWVRRSASTSHHQVGTCKMGTDELAVVGPDLRVRGMAGLRVADASIMPTIVGGNTHAATVMIGEKAADLVLSSS
>c375
MAADIIIIGSGFGGSVLASRLVEAGMKVVVLERGPWRDTVPVRAAGIEARKPLPRTGGLLSVLRSLRAPKGPRRGIRLNKHGYLELWIGDGIKVPCTSNVGGGSHIWAALLERAPAGFWDDRAPGLGDDTLSPHYDRVTKELKGVDPFDLSAFPNNGDIEWSHDDCFVRTEAGEQPLMGILFPGPDGDLSAVTDENGIVRQPLDFNRNNGMFGSPGASKSTVDALFLLPALKRGLEVRDLHEARRISANDSGGWAVEARDLRGGRNVTLEAPKLAVCAGTINTKALMLGSRETGGLDGLPALGDRLGANGDLIGKWPAGDRDTTLGPPSFGRVKVKGHEDSAYFILGGGEPPPVPGFLARGARSKAGRSVELVGMTQDAADGRCWWENGRFRFAFDLTGSPSYAAAMRAMDAVSEASGRTVDYPRTEVFTAHPAGGCRIASDASEGVVDGEGQVHGHPGLYVADGSIFPQPVGVPPSLSIAAWASHVAERIIRSN
>c376
MAADRIDTSHSADYIVIGGGSSGAVVASRLSENPNVKVLLIEAGGEARSPFIQMPAGVVRLIGNKKVDWCYEQDPDPSIDGRQFAWSGGKLLGGSSSINGTVFIRGTRRDYDRWAALGATGWDYAGVLPYFMRSETWTGEPAQTRGSHGPLTISPMRRGYHPLVERFVAACREHGLEFLPDYNADVKEGVFYTQASQRDGLRCNTERAYLRPARSRSNLQIVTQAEVRTILFAEKVAVGVEYIRGGRTEKALATREVIVSAGAMGSPALLLRSGIGSGSYLASRNKKVVLDLPGVGLNLQEHPGVAQSKLINVPSFNSQTGRLDVLRYLLQYLWNRSGPMASPAVPAMALFRSQPELDEPDSQIHFFPLSYDVDPDTTSFNTVGMSTDPMLTLHVSLCHPQSRGRVELDEHDRPHVHHQMLGDEGDVQSMVSALKYINRIFDTPAMQKIVVANRTPNPIPTGDDEWAAFARSKAAPGYHPVGTCRIGSTDMAVVDPHLRVRGVKNLRVIDASVMPTIPSVNTNATAIMIGEKGAELVSTSA
>c377
MAADRRGVGANLQNHPIFYLAAHLKASARQRGILRPATYNGFRYSSGLETCPEGDMFILIANRSSWHAAGERIGSLGVSVYKPHSRGSIELVSSDPRSASRIRFNLLSDERDLRRMCDGVRRCWRLLREPSVANLVNETFVPTAADVIRDLNRPTLLNRVKAGLLGALLDGPAPMRRRLLAIVSCSPDTLFDDDKALAEFVYTYTGAMFHPIGTCRLGQPDDPAAVVDSRCRVIGVGGLRVVDGSVMPTMVSANTNIPIVMIAERAADLILDDAAPQNGV
>c378
MAADTSAFDIIIVGGGTAGLVLASRLSEDPFLQVLVLEAGLDLPQIPENLMQAVLTPVANTQLYKMLIDWDLKTTPQVIPSFLLPFSNQPHSGILTLWVEANLGGRELGLPQGKVLGSSSGLNGLSFTSSSKAVIDGWVELGNPSWEWSAFSQSLAQAYTVAKAPPHIAKPRNRQGPLQIAYAGDCMDEWPKVWADTIEALGYSGVQDTLTGQVVGGFVIPDTVDPALGIRSYAANAYLSSEVRRRPNLTVHTGAEVNKILLQRPSSSDPTGVAVATGVEFTDLTSGTTTTITAHREVVVAAGTFGSPKILELSGIGDA
>c379
MAAEAYDYVVCGGGTSGCVIAGRLAEDLNVSVCVIEAGPDNADLDNVHMVGGWSQNFDGPTDWNITSEPAPGINGRQVKNSRGRFLGGCSGLNGTLCIRGNKQDYDDWGLDGWTGEDMWKCMARSELSRHGIQTQVDLQGVGKNLMDHAITFVFYETNEPKLTNDHLAYYDGALASSYQLYKDTKTGFLSAFPFGAFGYGRLDDRLKDLPEWQQASPPADPHVTKPHGPAENRDAMGLLPSAQPNVEWFSTECYGGPKQYADFPSNGQGAFAMISMLLSPRSRGSVTLASADPTTNPVVDHNYLADPLDVLVMAEACRWGNEIVTKGAGTKDYIKGSWPPSEKHHEYTTREEWADFARKNATTSQMPAYGIGEKAAELIREDAKRAPDARRNDSAVASI
>c380
MAAERFDAIVVGLGGGGSVVAEALSGAGWKVLALEEGPWYNPFRDFREGRARRVPIGLVYAKDSLRPMMVKAVGGSMVFYAGVFFRLHENDFRTRSRFGCGTDWPIAYRELAPFYEKVENFTGASGSPVNIFEAPRGPYPNPAHPVSKGSRYFARGARALGLHPAPTPMSILSRPFRGRPSCTYCAKCGEGCMVGDKSSPEMTYIPAAIKHGAQIRSGHRALAIETGRSGRVTGVLYRDKEGFREKAESECVVLCGSALLDPALLLRSRGPAHPRGLGAHSGMVGRNLMTHVGGRYLVRFPEVVNGFMGISGGVNVQDFYDGAPGADFRRGYTLYVSLLPGPPATFADWYLESWGAELTEVMQSYNRMIRLAVLGEDQADPENRVSEDPELKDEDGFPRPRVFYRRSEYERNMFRHAVESARKICRAGGADDWEFYYQDDGSAHAMGPCRMGDDPDTSVVDRWCACHDVPGLYICDSSIFPTSGAVNPALTVMALAARTADYLIRGRQG
>c381
MAAFDYIIVGAGSAGCVLANRLSEDPRNNVLLLEEGPKDQSWLVRMPKGNGKTLSMPRYTAYNPTTRIQASGREIWVRGKLLGGSSSINGMVWMHGQPEDYDAIAALGNAGWSWADIEPCFRKLEDHELGGGQTRGAGGPIPIRLHPPTPLGDAFIAAGAALGLPKKDDINGLPQEGIGYSAMNIDGEGRRCSAARAFLQPARGRRNLSVVTGVRVDRLRFEGHRVVGVECIRGRETITYSASGEVILSAGTIGTPRLLQLSGVGPADHIKACGVSVVHDLPGVGANLREHFLLMLNYRLKHAADSQNRCFSGPGLVKSLGQYILRGDGPMSNSSYCAAAFVRSGVEELRPYGQIMMAPWTRDWVTKKFGAQPGMNVFPYVLRPESQGSVRIQSADPEHTVRIDPNYLDVAQDRDQSIALVRYVRRLMTAAPIAPFLSGEMDGTAWAQTDEQIIQAFMEQGACGFHNCGTAAMGRGPNAVLDERLRVRGLSGLRVADLSILPNMISGNTNAPAMALAWRASDIILQDQKNSLR
>c382
MAAGLTTLIGATSVLSLGLIPLLAIGLTVFRYNNADPESYPQNARQLLPMYDFIVVGGGSAGAVVASRLSEVANWTVLLLEAGGNENEISDVPLLAGYTQLSELDWKYQTSPPSESRYCLAMTGDRCNWPRGKVLGGSSVLNAMVYVRVWLGVFGKDKRKAKHEGEYDKEGESETDGGISVQYRIALSTVITGFIAASFDYHPVTADDDAFDSDRTTKKYKGNPPEPIEAL
>c383
MAAGSFHSSALLAQMRAEGHFPRLSDQVGKNVGNNGDFLVAVALQCGDFSAPQGQAHVLRFKYLANDRYGFPAAGAPIWTPLGDVGAGLTWHALGGMVLDGSPVHGGEAGAATSTGRVHGYDNLLVVDGSLLPGSSGMVNPTLTITAVAERCMANYFRTATSDT
>c384
MAAGSPPHDRGGDRMRVVIAGAGTAGCVLAARLSAAPGVDVVLLESGPHYRPGDWPPELAHAYRIIKETHDWGFTAQAGASPRGVHVPRGQVVGGSSITNAAIALRGLPEHYDEWADFASGLNWQAMLPWFRFIETDADFGDRPYHGDHGPIPIARHPRDTWYPLIERFAEAALSRGHDWVDDHNAPGSLGVGPTPFNMRDGMRQTPADHYLDPALSRDNLTLEVGVRVDRVVMDGTRATALEVIREATGERVTYEADHIILCLGTYQSPPVLLRSGIGPADAITPHGIPVVHELPGVGRGMQDHPKISYRFWVGGDIPPWPHPWIQVLLTATAEVRGEERLFQIMPYVGFVDGGHRISEVNVQVADSRGRTGRVAIQSLDPMHQPVLHMGWMEDAGDRELAVVAGRELMAVARTAPLADMLDPWPNMDDPDHALRTVETFHHPVGTLRMGRGDDPMAVTDAFGAVRGIRGLWCMDASVIPRVPSANTHLAVIALSEKLGSEFLYATGHGAWAVTPD
>c385
MAAGTPVTGMIGVIASRVFSRGRLGLAGDSPHVQPRIEFGMLSDERDAVRMRDGFGRAVQLARHDAVAALTTGVTAAGTPLDRLRDPDALDAWMRASVRGSVHPAGTCRMGAVGDPAAVVDPACRLIGYRDTYVVDASVMPDVPRANTNLTVVALAERIAERLRDR
>c386
MAAHIRGNEYDIIFAGGGTAACVAAGRLAKADPNLSILLVERGKTGFDDPLMTNPGMMMANVAPETGVLYPYLANADDAVNGRQMIFSSANVLGGGSRVNLMMYTRASAVDYDCWETEGWYAKDLIPLSQRAETFHPSGPAYNKDVHGYSGPVHITHGPYSFKEGQDDLLAAASAQGIGEIPDLQDFESCNAFSRWARTVTPDGKRADTASAYLVPLIDSGNYPNLHILAETSVTRVVFEGTRASAVECEPTTNFPGAHADADADARPEPAQTIRARKWVVLSAGTFSTPSILERSGVGCADRLRRLGISLVADLPAVGEHYQDHYLCLYNYTTRLESHETIDALSFGQVALPDAIRDKNPVLGWSGIDIAAKLRPSDAEAASLGPAFQAAWDRDFRLAPSRPLMVLATLFGYLSDQLPEPADLRKRFLTMGLCNAYPNSSGNIHIVSRDPHVPAALNHGIFTSDLDVHAHVLFYKKQRELARRTNLVIAEHKPSHPAFPAGSPAAALYPEGDHEHDDAAAAGPRFRSAVERASLPPIKYSAADDAAIEAHVRSRVMGMWHSVGTVRMAPRERGGVVDPRLGVHGTTGLKVVDLSICPTIVGANTCNTAIIVGEKAADLLAADLGLVIS
>c387
MAAHRLRRAIAWAAQAVAAAGALMATKTNMPDVLIVGAGGTGAVMAKELAEAGLGVVVLEAGPWHDPQREFNGLEWDMFNPFDSLFRWGPLDRTKTPWPRVRDGIGLLFQTPGVGGNTLHYGANHPRAYMDSIETDWPFRYRDLVPYYYKVEETLPVQVPEIAATKDELFIKGCEAIGIGHVAGPDIRTSGWRMQPNAILPIAEDANPLVYPNTDGCVQCGECIVGCRNAEGAPLERTAKRSTNVSYAPLALKTKRCEFRTGVFVTQIVTEENEGTLRARAVQYREADGSLKEQEARVIVMACGPVETPRLWLSSGLPDNGHVGKYFTTHWFDYITGVFPHEVNMFEGQTSMVRAEFPGYGFFESQGAGPLTFALATSMGPKAVTGEGPWALSGRTWGSALKRRMEAYRRTLMLVVCVDDDGLAESSVSLAPGVADENNPAPLVRYRASDQTIRRRDWLSRRAAEVLIGAGADPDSIHRADAPASTVHQHGTMRMGFDPSRSIVDPNGEAHGVAHLFICDTSIFPNGIGGPNPTLTAQAVATMISERIVARYFAE
>c388
MAAIPTRLHLLLAALLVAPTLAAAQPRGFGGVVAPPPAYARYVVDAAETAAEEAYDYIVGGEAMNWDMKLVNSSYEWVERELAFQPVVRGWQAAVRAGLLEANVTPWNGFTMDHVSGTKVGATTFDSSGRRRSAADLLAFARPGRLRVAIRATVTRIIMSPIEPVARRGRSPQPAVAASGVVYQDRLLQQHHALLRPGGEVILSAGSLGSPQLLLLSGIGPANDLTSLGIPVFADVPDVGKHMFDNPRNGISIIPSIPIDHSLIQVVGIPSANGNESYLEAASYIVPLAPILRRGGPFSPSSPLYVTVVTIMEKVPGPLSEGSLWLTSSNPLESPSVRFNYLSRREDLARCVTGMRRVAKVLESTTMDVFRSAMGSLSQDSRRREFRIVGAALPVDWRTNDTALGDFCQQTVATLWHYHGGCVAGSVVDRDFRVFRVRALRVVDGSTFRETPGTNPQATIMMMGRYIGQKMIDERHSRRQVRTSTDSSSNA
>c389
MAAKLGILAVAFASSLSSAGSVPKASDYRAEYDYIVVGGGTAGSVTASRLSEDASVSVALVEAGTWYEKVAGNESQVPAYDATYNAKSANATNPAVEWGLVTTPQAGVGNITAHYARGKSLGGSSNLNYMLYTHSSYGAMQLWADEVEDQSYTYDRVKKYYYKSLNFTTELAEERLANSTPSYDPDVPVGGLLDISYTSFASPWSTWVAKAMDMVGLKNTVAFINGKLLGSSWVVSTINPRNGHRESAATAFLEPFKSRRNLKIYDLTRGEKVLFDKNKRAIGVEVTTNGETYKLRARKEVIVACGAFHSPQLLQVSGVGPAELLKKYGVPVIADRAGVGQNLNDHVYYGIGYRVNVETFSSLQYGDNTLEAQEQWNKNGTGPLASPGADYVAFGNLPDDIRASFSKDTLSTLAELPADWPEFMFSTIPAYISDFWTPAPPSPNDGYMYASLLATIQCPTSKGTVNIGSHSMQDPPLINPNWLTTQHDIELVVGGFKRLRQILEAPILADVTIGSEYFPGSSVQTDEQIYEHLMQAYNSISHPAASNKMGKASDPLAVVDSHARVYGVKGLRVVDASAFPFLPPGLPQSSVYMLAEKISDDIKDGK
>c390
MAALADTVVPSLDRSDDPTRFWSLGGSDLHADVAVGFTLVELPEQQRARMLALLDGLHAQGFVAASQSARERLIGDFAQLGPQPAAAMNALVSLTLAVAYAGPDPQTASNPMWEGFGYPGAPRIEPGGDEAPVPFVPDGPELSADVCVVGSGAGGGLIAGVLAQAGLDVVVLEAGGNFNEPDFSGLELPAFQQMFWRGGPTPTADFNVTLLAGATLGGGPTINWSNCLRTPAQVREQWAQEFGLKDVDGPEFDRHLDAVWERLGVNPDCSDLNGPHERMRDGAQELGWSFKTLFRNADPAAYSPDTAGYIGLGDRSGAKLDVRRTYLRDAVHSGARVIARCRAERVLTRDGRATGVQASFVDPRTGASVPLQVNAPRVVAACGSLESPALLLRSGIGGPAVGRYLHLHPVVAMLALHDEPQQPWWGGPMTALVDEFSDIEDGYGFLIEGAQWATSIIAGGMARATFEEHKETMARLGNAAWLIGLARDRGHGTVTIDDAGEAVVHYDLTDELDVRIAHQSIEAQIRIHAAGGAREIVSFAATGARWRAGDDLEAFIAEMQRIPLGAGGHRLFSAHQMSSCRMGSDPATSVANEWGELHDTPGVFIGDASALPSASGANPMISTMALAHRTAEAIAAIAVPGGGNA
>c391
MAALATFCQLAAAIPSRGNSSDYEYIVVGSGAGGGTVAATLARKGHSVFLIEAGGDHGDDLIQEIPSRASTAIENSEMAWHFYINNYRNQTQGRRDSKYTYRLSDGTLYYGLDPPAGAEPHCALSLGTLYPRGATVGGSTQINALNWAAASDKDWDLIAEYTGDDSWSAEAMKPYFKALENRTYREEGLGFDGFISTNRNNVSYITGRPDLAAFMSNAIRHTEGVNVSGIDHLTELLQRDVNDPLYSYTPGAYQLSVAETEDRRRSGARNYIVDTIEAGYPLTLSTHSLASKILFNRSGSAPRAVGVEYLVGEALYGADPRYNVSQTGQVKTVRASREVIVSGGVFNTPQLLKLSGVGPREELESFGIDVIVDSPSVGKYLQDHTEAIVVVNATEPWSNNPNTNCTGQFDSTDPCFVEWKNSGTGPYGEGAAPLSIRHRSSQSEDEEIDLWIYGFTGAIVRGWYPGFSRALPAPSALSFAIIKTQTPGDESSGTVTLRSANPRDTPDIVVDWLQGGHGERDLEILTEGAELLYSIMEDSPTPPSPFSRVQPGEGVDVAQNLKDEAFGHHGGCTCRMGPGNSLDHCVDSELRVNGVQGLRIVDMSVFPRVPGAFPQQSTYVMALKVADTISQSGV
>c392
MAALCYSPVRGNLFQNKPLATEYDFIVVGGGSAGAVVASRLSEISGWSVLLLEAGGDEKIISQIPMLVSYTIPTALNWGYRAEFTPGVCLGLRDRRCIWPRGKVLGGTSVINYMLYTRGNRIDYDLWEASGNPGWGYEQILSYFLKNICFDFCGSAKWPLLQSEDQQNPYLARSPYHSTGGPLAVSEAPFRTPLSVAFLRAANSIGYPLRDTNASIRNEYHKSSLNVKGGWRLSLTTSPPSVSRLSRKCWSLDVSQHYGPSRPVTRIYTIRSRPNLEISLRSRVTRLLLEGSKVTGIEVARDGKRYRVKARKEVILSAGSVNSPQILMLSGIGPRSHLQELNISLVRDLAVGLNLQDHVGLGGLTFLVNQSVGITESGIRNIGTILKWLKDGGGPLSVLGGAEAIGLLNTASPHEEWPNVELIFAAGSTNSDEGGLRPQSRGVIRLKSSNPFDAPLMYPNYFADQRDVDVIVSGTRLALELVQTSAFKQFGVRLHDIPIPGCEHLQFSTDEYWECHLRHYTMLFHHQVGTCKMGPGSDPDAVVDPRLRVHGIQRLRVIDLSIAPIIPTCHTNALAMAIGEKGSDLIKEDWGVSWSNETGCRTKQTRMRSVDL
>c393
MAALEGKEKAATGHPLLRVLRRDKYTHGLYPAQMEALRAMCGALIPSLPPEEALDGRRDTPRDKDLERFYLASGADSTIPDEVAELAFTRCVWEAGLLVHVTLWLLCTRLGTLALCGRLCVSGEFPYVRRFADMPVGRREEALRRWTRARWLIPVKIAFAMVKTLCFNVFYTKLNENSENPCLKAIGFSLPNVEEQRKKHPAEAAAPRPLDNGVVETRELDDATLLRSLADKGVAVKPATSGDYHAVECDVVIVGSGCGGGVAAAVLASSGHKVLVVEKGDYFTPDDYSSIEGPSMERLYEQGGVFCTSNVSTVLFAGTAVGGGSAVNWSASIRTPREVLQEWSRDHGLPVFGSAGYVQAMDAVCARLAVTDGCREEGFQNKVVRRGCEALGLPVDSVPRNSSEGHYCGSCYLGCPTGDKRGTDTTWLVDAVKHGAVILAGCKAERFILQNNSDKNGRSKKCVGLVATCMSNGITKKLRIEAKDKDLEAFLDEVTVARGPMQPGTDTWALLCSAHQMGSCRMGSSPMEGAVDGRGESWEAEGLYVCDGSLLPTAVGVNPMITIQSLAYCLSMDIAESLA
>c394
MAALGRASSSAPVLAAAAAAAVLLSLCLAALSEEQEQLENLRFVRHAQDAPLVSSYNYIVIGGGTAGCPLAATLSEHSRVLLLERGGLPYANMSSEQHFTDALADTSPASPAQRFISEDGVVNARARVLGGGSCLNAGFYTRASNEYVRAAGLGRAAWLNSSYRWVERSLVFRPDVPPWQAALRDALLEVGVTPDNGFTFDHVTGTKIGGTIFDNSGQRHTAADFLRHARPRGLTVLLYATVSRILFKSQDGVPYPVAYGVVFSDPLGVQHRVYLRDGDKNEVIVSAGTLGSPQLLMLSGVGPQAHLEAHGIEVIVDQPMVGQGVADNPMNSVFIPSPVPVELSLVQVVGITRSGSFIEGVSGSEFGMPVSDGALRWARSFGMLSPQTGQLGTLPPKQRTPEALQRAAEAMMRLDRRAFRGGFILEKILGPVSSGHVELRTTDPRANPSVTFNYFREAEDLERCVHGIETIERVIQSRAFSNFTYANASVESIFTDSANFPVNLLPRHVNDSRSPEQYCMDTVMTIWHYHGGCHVGAVVDDDYRVFGVHGLRVIDSSTFKYSPGTNPQATVMMLGRYMGVKIQSERWKK
>c395
MAALGRASSSAPVLAAAAAAAVLLSLCLAALSEEQEQLENLRFVRHAQDAPLVSSYNYIVIGGGTAGCPLAATLSEHSRVLLLERGGLPYANMSSEQHFTDALADTSPASPAQRFISEDGVVNARARVLGGGSCLNAGFYTRASNEYVRAAGLGRAAWLNSSYRWVERSLVFRPDVPPWQAALRDALLEVGVTPDNGFTFDHVTGTKIGGTIFDNSGQRHTAADFLRHARPRGLTVLLYATVSRILFKSQDGVPYPVAYGVVFSDPLGVQHRVYLRDGDKNEVIVSAGTLGSPQLLMLSGVGPQAHLEAHGIEVIVDQPMVGQGVADNPMNSVFIPSPVPVELSLVQVVGITRSGSFIEGVSGSEFGMPVSDGALRWARSFGMLSPQTGQLGTLPPKQRTPEALQRAAEAMMRLDRRAFRGGFILEKILGPVSSGHVELRTTDPRANPSVTFNYFREAEDLERCVHGIETIERVIQSRAFSNFTYANASVESIFTDSANFPVNLLPRHVNDSRSPEQYCMDTVMTIWHYHGGCHVGAVVDDDYRVFGVHGLRVIDSSTFKYSPGTNPQATVMMLGRYMGVKIQSERWKKX
>c396
MAALLYALCVLPTTLATIGVGLSPNGVTELFGNSFGLPGENATYDYIVVGGGTAGSYNGREILYVAGQTFGGSSASNYMGYARATEGTFDEWSKIVDDDLWSWENVYPAYKKSCNFTAPNYNKIDPSFNISYDVSAFESTGGPLQVSYGNSLGPYGPYLEESLDKLGFERLPGFNSGRLIGYATIMTAIDPEEATRSSSETSFLQLAAQHSNTKLYPQTLGSRILFDENKQATGVEVQTNSSTSKFKYHLNANKEVIVSAGTTLQKYNIPIVADLSGVGQGARDQPWMALSYKVNVTTVTQVAAGNAEFSAARVEEYLTNQTGLLSSIGGGQALAFENQSNRDFLDTFPSDWPEANYLSLEYGSYPSDLGPDDNYLTTGSTLLTTSGDQEQVIAALQRIREIAFNSTIVEEEYLPGPNVTTRTEILEWLKDNMSLIYHATSSCKMGISNDTTAVVDSRARVRGVTGLRVVDAGAFPLVPPTFPMVTVYMFAEKIAESILGGQ
>c397
MAALMSVAAVVLVAVIALVVVILLPESPTPLTTSIDAEYDYIIGILISTYGTETLAFIASNEEKRKLRWPDVELHLHSFLSIRDSDTLTAEFDILTCPVVFRVKGIRCLRVVDASIMPTIVSGSPNAAVIMIAEKAADIIRGRTTV
>c398
MAALNSAVALLLVTLGFSAIEADIVFPSQAKLTDNASYDYIIVGGGTCGCVIARRLVDSNYTVLVLESGDDPSANSMLPGLFYLLPGTSIDYDYRSTFDDYAAGAQGNFTRLTAGNALGGSSVLNHHLSIRPIPQDYDDIASLTGDDGWSYDNMLPYFKKTETVKDEEIASTYSEYHGDSGPVGITRELHDDDVAYYLKALAEVGNPTVEDLNGPVSVGYMQPLLNIASGIRQTPAYVYLNDIKDNPNLHVSKNTKVSKINFENSTAVSVEAIYKDTTYTFRANKEIIVSAGVFNTPQILQLSGVGSTDVLDSLNVDQVADLPVGDNLRIPPTVIVVQKTKKHILPSIPNLVHAFVPFSIPFPLLLGTTPINKSSEIPDYQTYNLMLPHDTPYLTLACTFVYGYSLDVCLRWQTQIASRDAVYSVVVNLDAVSTGTVRANSTDINDAPLITTGFYSESEDLERAVDILLDLLAVEDSATLKDLGAAVVGVDFSECADKEAGSREFWKCYVLHRTIAGFLYSGTCPMQTCVDSELKLLGLNKIRVADASVFPKVLHGALNAAVLSLGEKAADLILQDAAN
>c399
MAALSSKSLATAREHLKSHYSVVIVGSGYGGGVAAARLASTGESVCLLERGKEFLSGDFPDNENDALKEVQATLTQEEADAETLGSKSGLYQFHIDHDISVFRGCGLGGTSLIGAGVSIQADPVVFKEPCWPQALVDDLSDGLAEGFKRATQMLQPVEYPDDGAPLAKMQAHQRAAEVLGEPFIKLPINVQFKAITNDFGIHQDACKLCGNCTLGCNSGASNSVAMNYLPAAQQHGAEIFTEMDVRRVERTFDGRQWRVYYFPLTADKTLYDRADELFITTDCIVLSAGSIGTTEILLRSKNHGLSLSKQLGKSFSGNADLLGFGYNGDERINAVGHNQRNATDLDPVGPVVTSAIDARDKTKLQDQYLIEDSAMPGAFSNMYATVLAGAEPLIRKNSGTKGQGFLKEKWRKAESTFRGAHFGAVAHTQV
>c400
MAALTQKVSFPSFRTLVFGSLRIRACSVVIDAAAHQPCRDYRRVPDSLITVLFRAIVGSHQYWYAVMCRFEPVSTDFAAELVQWVTCSTTVLMRLSARIHSLEGVSGLTIDNYTRSRHGLPQEPLNNQLIAYPHGYGHGGSNSAKYTHGSSDDYDRFAELAGDDGWNWDNLFPYAIQNEKHVPPNDGCNETGQRIHSIHGTDEPLSTSIYGYATDFDDRVITTTSELSEEFPWNPAYNSGNMLGVSWMNSELSIRHKINGMIDASLRTISGPLRSSSATASLLRSGSQQINRLYMSLLWFRKRTQACHLSTTGFGEWHLLAHCLHRIEFFILKPIRLLWAVGK
>c401
MAALVRVLVVALWWCQVVVNASLTEYSDVAIAQRVERLVANLDTYVFPVNNNAFFETVDDLAEDPCVEGDFDFIIVGTGSAGGVLANRLTEVANFTVLALEAGEETPVESDMLGVNIYLHRTRHNWGYNTTVQENMCLGSVNARCPYPRGKMLGGSSAINFGMYVRGHHDDFDHWEALGNPGWAYDDVLPYFKKAESATFGDDIDLEYHGFGGPQKTGVPNDTPVLTQALIDCHIDLGKTEKDYNGKDQDGVSRLQFFLDGNTRSSSNEAFLKPVRRRPNLVVSTESYVTRILITNQTAEGVVYMKNGKECTVRANKEVLLSAGAINSPQVLMLSGVGPQAELEKHGIELIQDLPVGQNMQDHQFFPGIFYRTNQTLYNITLLQMVDLWKRNLRPLTPSLGQQTVSFWNFIGPEDSQPEVEFFFFGPPLITPDIAVILGYTEEYVGIFNLLDALTDISVNVELLHPRSTGSVTLQSSDPRDFPVIDPNYFSDPEGVDLENVYRGVEVALQFNDTETFRSLDTEFLLIPYPECDAQYDQLSKDWWYCAIKTLASTLFHPVATTKMGPDAATSVVDSQLKVHGVDRLRVVDAGVFPDHISGHPNAAVVMIAEKIADEIKSEHLGCSYWV
>c402
MAAMATTASSLLKTSFAGARLPAAARNPTVSVAPRTGGAICNSISSSSSTPPYDLNAIRFSPIKESIVSREMTRRYMTDMITYADTDVVVVGAGSAGLSCAYELSKDPSVSVAVIEQSVSPGGGAWLGGQLFSAMVVRKPAHLFLDELGVAYDEQEDYVVIKHAALFTSTVMSRLLARPNVKLFNAVAVEDLIVKEGRVGGVVTNWALVSMNHDTQSCMDPNVMESRVVVSSCGHDGPFGATGVKRLQDIGMIDAVPGMRALDMNTAEDEIVRLTREVVPGMIVTGMEVAEIDGAPRMVRTKKTSNSSP
>c403
MAAMFVSAADLGDATLDCDIAIFGAGAAGISLADSLRTGRQRIVLVEGGTFDIESGAQALFSARSIGEPFSPNHGRYRVFGGAAVAWTGRCAMLDPQDLEPRPWLRDSDPPISFADLADPYRLAAQACGFETGWGADPAVLARVHALPDRPAAIAPFAWRFWGTARNCYQHWGERHYAPFRRSETLRVLLGTNLVGFETEPGGRRVNAATLRTIDGKQFTLGARQFVLCCGGIENARILLNVAEQTPALVDDVAPVLGRYFMQHPRATTASVTAAGAQAIKLQKLFNRFKRNRGLQFETGFSLSALTQAREGLVNASAILRYRRAPERWSAMIASRLRVDRMAEAAIRWRLGRVQILEPVIASLVVDLEQQPDRDSRIVLDGQRDGLGLRKAAIDWRIGPVERQTSTTLTRAVCRWIEHLGLGTANVAEDIESDGALRDDRLMESFHHLGTTRMSETPRTGVVDADLRVHGTDNLYVCGASSMPVGGHANPTLTIVALAMRLGDHLKAL
>c404
MAAMPVRLNVLFNALLFVPLLISSGYSNPERDMGIYTELPAHLSEVDVIVAGGGTAGCVFASRLSDAHPELSILIIERGSNNDDDAAVDNPLFWLTNVMTASSRMLIYHGADEPQIGNRAVDIFTGSVLGGGSSINCMAYSRAQSGAMDEWRIPGWGAKDLWPYMKKIETYNDKSGSPDIHGYDGPLQITGNGAWGPTRLQDEVLKAAAGQGYPEAVDLQDMDTVNAFQRCHRYIDSQGKRQNAAHAYLHPRLKDGKHPNLHVLTQHHVLRALIEGGKAVGVEIVRNTDASGTRSGGSSTDKTTVGARKMVAVTAGNFGSPQILERSGVGDSEVLAQAGIETAVDLPGVGGNLQDHLGFFTSYLSGLPSNETYNGIINGSVSLHDMLERHDKKIGWTAYEVTSRLRPSDSEVHRMGRKFEAAWKEDFGRDPTKTAAVLATYGGYYSPNLPTNLSNELFSVAGFVAYPRSRGSIHVTGPSFSDAPRLVTGYLNDESGFDTQLMVWMYKKQREMIRRMPTYRGEYCPDHPSFPEGSDAACVTVDGPVPEDAPDIKYTAGDDKAIEAWCRKVVASHSHSVGTCKMGSQQEGGVLDEHLNVHGVQGLKVVDLSIAPSTVQSNSANLAFTIGEKAADIVSGEFLGEANRI
>c405
MAANGNGADNDHAREAGGFDLMVLDVRPEQIANEHFDLVVIGSGFGSSFFLHEFLKRRKARVLVLEWGRHNTHEWQLSQNANTDIDDESTYKTDNADKPWNYTIGLGGGTNCWFAQTPRFHPNDFKLKSTYGVGNDWPISYDELEPFYGDAEEIMSISGDPDMARMLPRSRPFPQPPHRMSTPDRMMKAAQPDQHFVMPTARARVATSQRSSCCANLRCWLCPADAKFTVNNGLMHVFQHPDVSVCLGAEVRRFDHARAAVRSVAFVRDDKQYSVSGDLFVLGANAIQSPAIMLRSGLGGEFVGLGLHESYGWNYEAYLGGVDNFDGSTITTGLNFGLYDGPHRAEHAAALVYFENRWQHGMRAEKGRLRQVLPLVIVTENLLDPENRVVLDKDENAFVSFKGASDYATKGMAKALERLPELLKPLPVEQIFDRGIRPTESHVQGTLRMGTGPADSVVDRDMIHHQLRNLVVVGTSTYPSCSCANPSLTAAALSLRAAGKLAA
>c406
MAANTLYTPETLSQFLSFNFDYIIVGGGTAGLLLAARLTENPNIQVGVIEAGTLKKNDPNVDNPARLARTLYNPEYDWMYLSTPQAGTNNKVHHVARGKLLGGSSGINYMAYCRPAAEDIDLWEKLGNKGWSWNELMPYYLKTQKLELANGIQAPQGNILSPGLPQSHGHSGPISTTYPRQRAPFEDRIIRAFDETSKIPRAQDPWSGRPLGLYDHLSTINRDNGATRSYAASAFLYPCLQRENLKVLTEATVCKVLLDTHSSKATGVEFFCSGTMHQIFPTVETILSAGPVQSPRLLELSGIGNPEFLRRANIDCVLPLSEVGENLCEHPMTSITYALDETKSLPQNNLQVARDDNMSDGVRLMAFLPYSSLVSQKQLEETLLNVTQCPQLLEQERCSVASRLQDPTSGALQFNGTTAMVDIEGGHSNQSRLISDTSGHEHTYYSFHVTITSTLSRGSTHVTSSDPFAKPAIDLGLLRDPTDVELLSTGLEFADKVFSSSHVSDQVVTRVIPSPDVDLRDREQGGRFVRDWTTSFNHILGTCAMGRVVDERLHVKGISGLRVVDASVIPTQISGNVMATVYAVAEKAADLIKEDYSCSTTN
>c407
MAAPAEHLVPPEHRIEYPNVTVGALLEGDRELAADAIVVGSGAGGATAAARLRDAGFDVLILEEGGLHRTETFTTDPATMIQRLYRDAGTTMIFGKPGIIFAEGKCVGGSTVINGGMSWRTPERVLDHWEKELRLDASGARAMDPYFVEAERILHAEPNQEDTFGGNTRLFLEGARRLGWPVARAPRNMRRCVGLNNCALGCPTGAKQAMHVTEIPRALAAGAALVTHARVDRVLFRGTRAIGVRGRFVGDDGRKRGRFRAHAPLVVLAAGARCTPGILKRSWLRARPIGRGLHTHPNAKVVGIFDQRIDPWVGTHQAFHIHHFLGEGVLIGYAAVPPGLLAGAMPGLGAEHARRMREYNSMLTAAALIEDENEGRVILGPDRQPYMFFNLTGHDLETTHRGVALTAELLFAAGARRVLLPFSDLPELAGPDELHRIHQRPRRAAGIELMTVHIMGTARMATDPRRGATDPSGAVWGTEGLVVADASVLPSSIGVNPQETIVAMALRNADRWAERRRTAVA
>c408
MAAPLYHSDPTIKPTSIFSPEQWETLLAICDTFIAPLGQDEIQKLLQETHSNAVKERKELVVAFLQEKATDYPGFKEKLDRILSNNIQPSKLRQIRFVLSLLSSRFGAVLTGHITPIHQLNRAQRECVLQSWTKSPLLSLRTLFSSLSRLSRLGYISCSEVAMQAIGYPLTDPDSNHPTRFQAKRFHDFMFLDIKGETAELHTEVVIVGSGSGGGVVAAILAKAGRKMIVIEKGKYHPQETLPLSETEAKENLFEAGGALMSDDGCVSILAGSTWGGGSAINWSTSLQPQSYVRDEWAREYPFFNELAFQESLDFVCKRMGCSTKHMKHNKMNHALIEGSRKLGFPYCDNPQNTGDAEHSCGYCGYAQLAIILQTSRYGCRYAEKQSSNVSWLVDAASNAQFLQKTHVEKVIMKGNRAIGVEALVNGQTKLRVFADVVVLAGGAINTPAVLLRSAVKNKNIGKNLTLHPVSTVFGHYYDEDTKPWEGAILTASSQISERRVLGWGAKLEVQWNIPGLAALNAPWRSGYQVKRNMLYWNQSVAYSSRARERDPGYVYIDKQNKLPRICYTLSSFDCDSILDGVLRLCDIVVTAGANEVFTGCLDVEIYKTTERGIADPSYKNWKESVRTAGIIPGRSTIGSAHQMSSCRMGKDPRNSVVDDHGRVHGYQRLYIADSSVLPSASGVNPMISTMGLAHYISLKLIEDMKSMNALSSL
>c409
MAAQRTSASTVVPTDAAMYDFIVVGGGTAGSVIASRLAELQQWHILLIEAGGGPSDKDLSWNLQAQRQMGSCLGAPEQRCEIPTGRGLGGNTLTNNMLYVRGSEADYDAWAKQTNVDWSYRNVLPYFLKLENFRKNASSTSRQQRGKGGPVPIAGLREKSPLVRSFISACNRLGLRTTDYNAERNQTVGFVQLTQYRTKRITAADAYIRPVKQLFNNLHIMSSARVTKVLINGMNRQAVGVKVLVNGKQRKLRATKEVILSAGPIFTPHLLLLSGIGPRAQLDALQIPVLADLPVGATMNLRLVSFPLHLATNRTVPYAAQKMIEAIAFLNTTKQNNTDPTHEILFQYEPRGTLEYFSLGLIHLRPASRGFVQLNATNPSRNPVVYTNFFSAPNDMEEILSGITECLKIVHSEEFTKLGLQSRKLIVPPCDKLRYGTDEYWRCVVRHVGHAADQPYGTCPMGRQDNRQAVVSPELRVHGIGNLRIADASVMLPVSNGHTQATVYMIAEKASDLIKSSWDWGNELERRR
>c410
MAARELAVKRKLATALSNSRRVSQNISTLSVTTLANIGQGSFSMQAQDSETQTVDYCIVGAGSAGCVLASRLSEHDRYSVMLLEAGRSDSHPFIHIPAAFIFIYNNKRYNWRYAAEPDPNLYDRSLVITQGKVLGGSSSINGMLHVRGQREEFDQWAQSGCRGWSYDELLPYYRKAERYRGSSRSALAERGVEGPHVVSDAADVHTLTRAFVDGAQEIGMPFNPDMNGDSREGVAYFQHNRNGRFRSQPAQTYLRTARRRSNLQIKTEAVATRILFEGTRAIGVRYVQNGQSKTVMARKEVILAAGVFKSPQLLQLSGVGDPDVLRDIGITPVVANRSVGRNLRDHFLMTVVQRVQGIATLNERSRGLTLVKEVLKYAFLGEGMLTLGTGSAGSFFRSRPGLAAPDAQLMFIPGSYGSVPGILEKEPGMSIGFWPSHPQSHGTVSARSPNPLDQPSIHLNFLSAEDDQRVVVECVRKSRAIFASRAMARWSVKEVRPGKDVHTDDEVIDYARQNGRSGMHLVGTCRMGSDEGAVVDPQLRVKGVTGLRVVDASVMPNCTVGNINATVVVIAEKAADLIMSV
>c411
MAARLAETDARVLLLEAGGPAPPETSVPGLMPLTLGSDVDYHIKLNTPPHLQQGFQDNSSFLNIGRTMGGGSSINGLVYCRGHKLDFENWANLGNPGWDYESVLPYFKKSERYTGIVNPNTGGCKMWQSSHVFQIR
>c412
MAARLSENPDRSVLLLEAGPTFSGVADVPAALVDASMLPVGPGSEWVGTYGAELAPGIGRTIARGRVLGGSGAVNGGYFVRATPGDFDAWPQSVWSFDQVLPYYVRSETDIDGCGSSQWHGSRGPMPVARTPENARHPLTAAFVDSAVRAGFRMYEDMNAPDAASGGVGAVPLNIRNGTRVSAALAYLLPITGRNNLRVQGNTTVASLMFKGTRVIGVEMIVDGVRRIVRSDTVILSAGAVHTPAVLLRSGIGCADDAVALGISVTVDSPGVGHGFSDHPEITVPVATGNDPSATSPALEAVLHAGDVEIRPYTRRFDQLIHGLPRGPHVVGVGLMRSAGRGSIALRSTDPFEAPEVRYRYLESEGDRRAMREGVELTRELLASARLSGEVAAPGTDDPLSALGTSLHLSSSAKMGPESDPVSVLDDHCRVRGVEGLLVIDTSAFPVVPSRGPHATAIMFAERAVALMGVEPAE
>c413
MAARLSFVSHTAADRMTLAGVLRRHLVGYPIRPTTQSSIHLGGPSPEDPPVIRPRYVETGEDQAATARILGWGREMVTRNPLAELVESGDQPGLSISTAEQVVRPAQDSPLGVHHAIGSAAMGPDPDDVVDDRLRVRGVEGLRIVDAPVFADQPAGNTTAPTMAPAWRAADLIRQES
>c414
MAARPMSIRHDASKHARYDCIVVGGGTAGVIVAARLAEDGRRRVLLLEAGDAGGGELPRALSTAGFPVLQGYNWPWQAHVRDEGIGSAVTLPYPMARTLGGGSAINGSVAVHARREDYQRWAAAGNPGWGWQQVSPWCARVDRVLYGDSGSASAYPASLATSPLQDGFIAACAARGFHTVDVAVSDSAGVGAIPHSAVAGRRRSSATLYLRDAPHHTNLEIKGGCEVRRLLLTGAGERVNASGVEVRSASGTDVFHAAHIVVCAGAIGSPALLARSGIGPADALAAAGIPVRLALPGVGQSLQDHPVVSLWAKPQPGRHALGDTLHKGLLQFASADAAQGCDLQIFALAGIHADDLPGVHELGGDGVVSGLSSVLAAPRSTGRIEFLPLDGALVPRIVLNLLDRDDDLQRMKTCVRMAWDLIRSRPLDALIGRPMSCSQRVVDSDPLLERMLRVTVRASWHPVGTLRMGPQRDGMAVADEHGLIHGCDNVSVADASLIPAIPTVPTNLSCMVIGERIAAHLRDRIG
>c415
MAARRLLVQGLQHSRQAAGVHGLCRRAGGLPADLRRGEGGRLARLPTGRAGAGARAGAGRREVTDTAAAEGYDYLILGGGSAGCVLANRLSADPAVRVCLVEAGPSDRSALIRTPIGIMRLIDHPRYNWRSATVPQANAGGRPLYVPRGRVLGGGSSINGMVYMRGDALDYDGWAAGGAAGWSYAEVLPYFLRSEDNEVWRASPWHGTGGALHVTDMRTHNQVARDFLAAAELLQIPRSTDFNVPHPIGAGFRQVTQRRGRRESAVTAFLDPVRHRPNLTMLTDALVDRVLVADRRAIGARVMHGGASRTLAARREVVVTAGALGSAAILERSGIGDPAILWAAGVAPVHALPGVGANLQDHGTASVTHRTRSLVPYGLSWRAVPRLAWEGLRYVAARRGLLSSNASEAAAFLRTDPDDPRATLQLSFVSGRRGTRFGAGDWGHGYGITAIQLHPWSRGSVHILDADAATEPAIDFAAFDDPRDLMLMMEGVTLARRLLATPPFARYASEEVLPGAGRIGAEAIADHIRRTSGTAYHPVGTCAMGTGPMAVVDPALRLHGMTGLRVADASIMPTIVGGNTNAPVIMIAEKAADLILGRPPPPPVAIA
>c416
MAARRPRYLGQSLHYASRDRICVHGGPAGSASGDHQRIWRGSRRRATDLGYAHLDRGTRTPPNRLVPHARGVANERAKTVGGKGFDYIIIGAGSAGCVLANRLSEDPGAQILLSEAGGRDRQPLLQVPIVAGYWFTQRYFNWCFETEPQANLAGRRISWPRGKVWGGSSSINGMSMSAATHSTMSNGSPPD
>c417
MAASAAGSPGSPASSRTRACGCAIARSGLCGWTACPRKARPRWKRRWRREALRLGFAAPLARLGRPGRRPLRRGAAPLGGACGAVVAPRGASRALLRRARAALAVLARRRARRTSARGAPDRRLGAGPGALRAGQVGAPSRRLEPRVKSYDAVVAGSGAGGAAVAGRLAAGGMKVLLLERGGPARASRSAVSAVRRHYARGGLGAAFGDGLLPVPTGFGVGGTTAINSGTCLRTPADLVAGWERDVPGFSAAEFSSRLDEAWTALKVKQAPTETLSGSSRLVLAGFRRLGVLAEPLHRAEDGCTGEARCCFVCPSGAKMTSDKAFLDPLPSGTRPELWTRAELVGAASGRATVRRGREVETVAAGVTVLSCGALETPNLVRALRLGPEWRRAGDGLTLHPAAKLFGLFPQAVLPARGVPQGVGAVHPADHRIRLEGVATPPELTALTLPLEGARLKAWMAARARLATFGLMVKDEARGSVRAPFGRAWPLVRYAPTPGDLERLARGMRLAADALFAAGAERVLLPLNRRRNEARDAIESSALLSGGVTARELQGMAFHPLGTCGLGRVVGADLRLCPGVYVCDGSVVPESLGVNPQITIYAFALSLAARLLGGKG
>c418
MAASFPSKVQSLKDLDKQTFDFIIVGGGTSGCLIAARLATAMPQRRILIVEAGGEVDEKDLVPGYCKPRFGSSDGNWMYETLPQKELGGRKLPYPRGPGGNNFMAWVRGPSVDYDGWAEAVGDEWWKWDNVLPYMKKLEDFRPSIPNGKSKYADPTPGFHSAGGMFAVGYGTEWQPLIEYCMQASQEAGHSVNLDNNDGSPIGLSIAQFNVDNGARVTSASAFLNSDARSKLKNLIVVTQTIASKIIFDGKRATGVQLLPTVGTGTDDIANVYASEEVILTAGCFQSPQLLLLSGVGPADHLKGFGIPMILDAPAVGQNIQDHSAFACEFIIKHSIPGHNQLLNDPKALDAAVKQYATDKTGPLAMFGASAAIIFPKLPKVLSSTEFAFLSPAEQDYMRAGLRPSTEIWMHSGPLFYTGPCPPDVSVLVLEGLCQNNLSRGSLQLKSTNPRELPAIDPGYLTHPYDVRIAVETLREIVKIAQTPTFSSIIESLLLAPRAKDGTNALPSISGDDDEILENFIRDTLTQGFHSMSTCMMGQKEEKNKVVGTDFKIDGLQGLRVADMSVCPILTSNHTQINAYLIGERCAEFVLKEHGAGSLKGQHAHL
>c419
MAASFSHRRLVGTMAWDAEFDFVVVGAGSAGCVLADRLTEDGRHRVLLIEAGPPDRSPFIHVPAGFLRLIDHPQLSWRYRMAADPELGGREISLPQGRMLGGTGSMNGMLYVRTSPEEHRRWLAMGCTGWSHEEALACYARIEATLPDTAGPPLPVSEFMETHALSAAFLAACGEAGMRVQPSVNGPEREGAAPFQQNRHGRFRRGPAQTYLRRARRRPNLRVMTGALAQQLLFEGTRAIGVQVRHQGRVQQLRARREVIVACGAIRSPHLLQLSGIGPAELLRTLGVPVVADRPAVGENLRDHYSVRLTQRVRGIRTLNERTHGLAMLGELARYAVQGRGLLTLGASTCAAFARSDAAQPFPDLQLSFAPASFEPGTYRLEQAPGMTINVYQSLPESRGTVRARSRDAAQPPHIAARYLSHEADRAAVVAGLRLGRRLFAMPALRQWGIQETLPGPAVDDDAALLRYALDRGVSGYHLVGTCRMGGDEDSVVDPQLRVRGAQGLRVVDASVMPTCTSGNSNAPTLMVAERGAAMVLAAHRA
>c420
MAASQQLRHAGAGSSMQGWRVPRSAMTAVVLATLAVLAAMLSVHTPVAHASSNPLPFPNNKTRYDYIVVGSGAGGGPLACNLARKGWKVLLIESGSNYTSDNASVPIHNALSVEDPGQAFDYRVKHYDGGPDVQYPRAGVLGGCTQHHALIAHPPHKVDFEEIAQLTGDSSWDPIQMRQHWKSIENCSYSPYPGNPNDHGYRGWMPTAQVNLAKPPLELDSLITIPVLSFQNVSKGKLNDYFDPFNYDDTDKEGHFIMPTMTYKGKRYGVREFIMDTVRRFPDNLHVMTNTHVTRVIITPDTKVAVGVQYTRSLNNEQLYGASPMATPPTPGNSVNGSAFVQREVIISAGAFNTPQILMLSGVGPREVLQEKNITVLVDLPGVGANLQDRYEIAVVSSTLVDFNYPCRDLYSWCRESLDKNEQQSILSLNGPVLGVTRKSNASLPAPDMFLFGSAGNFTGYRPGWSRDENLRLLHDRWTYLLLKAHTQNRAGFVKIQYFQEGADEDLNALVQGFKLMREMADVVRNESLKAGLPSSLFAEELYPGPSVQTDAEVEQHIRDTTWGHHACCTAKIGKQEDPMAVLDSNFRVYGVRNLRVVDASVFPKIPGMFITVPILVTSQKASAAIDAQALDACRDSPYCMSSDDDSGLSRQNIGAIVGGILAFIGLALSLLYALSDKFRNKKKDAEVSARAQAQFEADRARQRAATKDRITLLGKEKEGAIDSDTLAINVTPAEARARVMFAELDRDNDGYIERHTLRAALSAASGIPLDEVVSDDVNKLLEDEPLAVDGKVSLQEFLRIRDRHVSITVPDSRANGSSMLFTPTDVYFENITLDYVDPKTQESNRVLHNLTGYIAPGTMTALLGSSGAGKSTMLDVLSMRKNTGNVEGRVLINGHERNSSFYKMSSYVPQEDLFLPTVTVREVVMYYATLRMPAYATPAARWRRCEMLLLESGLLEYVDSKVGGPLPGGITVRGLSGGQKRRLSMVCGLIANPAILFLDEVTSGLDALSALMVMEMIRRLATQGLTIIATIHQPRTSIWRMFDKVMLLANGRLMYMGDASRATEWFNSLGYPTDPQANPADFLLDLTSISFHKDPALFGNKTMRKLEHVEDAADAFAKSEHMALLRRQQKFVSYSRGVDQTLELMTRFGKDKDAKMQSSLWRRVIESSRKMAGNAEHQSMAPWGTQFGVLLKRAITNYVRNPGNVIARFVLVAFTGFMTGAAFFGLSEHWDALNSRLGALYFLCVIYVLLPFTSLSLFIYDRQFYSRESAARLYTPSAYYLANSLVELTFNAANVAISASVAYWMIDLGLSDNILGAERNANGFWVFLRIMTLLHIVGNQMVQLCGLMMPNQDMAFALGAGFVILCQIFSGFLVIPSNFNEVTEWLQYTSFLKYAYAGVVLNEFEGYDANSDPSFSIIEEAHFSNPTTVADNQYVLLGFFFVFHIMAFLCLKYLHKERR
>c421
MAASTDSDAGPTWTRRGIHRNVRSRARAGSVELPVRVRASAPRRRPSVTVMRHIDIRPXXPAILTFIGSHRPPSSSSHLNTTMADFANKKFDYIIVGGGTAAPPSRREDPSVTVAIVEAGEYVTDLPSIIVPGMARMAHGNTRVDWNFYTVPQKGALGRKIFEPRGKLVGGSSALNYMAWGRYVHVPDAYICAHAPVPAHAHIPIFIYLCHCLYSDAAADARPYIHSHILAGPQRKSTMVSIFIPCRAPRQHHDLSLSTYTLYALCSTSARSHLQPCLFADTHPTPPIGPCLMRSAPSAIEALGNPGWNWNAFLPYLMKVEGSIEAPADVAAKYHTDAFAPTFHGQTGPVKKSFVHWFNDLHVPFLQSVANLGVPIRTDTGNGSNYGAFTGAFCIDPETATRSYSATAYYAPAEQRENLVLIDQAQVTRVVLEPAGDGSGDYVATGVEFVRKGEKGVVAAAREVVVSAGSYQTPQVLELSGIGKPEVLNKFGIKPLIDLNVGENLRPPVDSVLLRGVVRVRDARRARGPGPPERGDRSLVRPPAPPPHHRCCRTTDTPRPHHSQEKKRGIMSSVFSAFSFIPLTK
>c422
MAASYDYIIVGAGSAGCVLANRLSADPGLRVLLVEAGGHDDRLIIRMPAACALAARDPRLDWGYASEPEATCGNRRILQRRGKVLGGSSSVNGMVANRGNPRDYDAWAAEGLPTWSFAHCLPYFRKMESFAGGADAWRGGDGPQSIERCAATHPLYQAFLEAGAQAGYARTEDQNGARHEGFHIAQSFTRRGRRCSTATAYLHPARHRPNLTVLSETLVRRILFDGRRAVGIEAQTAGTIARHEASREVILSAGAINSPQLLLLSGVGNPAQLRSHDIPVVAEVPSVGQHLEDHPIVPIQYATPEGLSLSHRFKGARPYAIGLRWLLSKSGLGASTLCEAGCFFRSSDAAGYADIQHEFYPLTAMMGEAEANFDDGFMFSMGLMRPESRGAVTMKSADPTTPPAFAFNYFAAESDRRIMIDGLRRTREMAAQRAFDGMRQGEIMPGPDVRSDDEIMAWMRSAVTTEYHPCSSCRMGIGEDSVTDGEGRVHQTEALRVVDASIMPHNVTANLNAPVVMIAEKLADAILGKRPLPPSPLVPR
>c423
MAASYSDERSPLLRPGVQRIGRRTRLLVSGLALLLLFAGGAACVAIVLRLLRPGALSTITPLVLSEEYDAIVIGGGPAGSVVAKLLSDDPWRRVLLVEAGNASQTQLGGKVGRLNLCKNSWRSNLRNLILQDAIPSPLNSKKLTPFDVPFYWTNVANTPSLHWAYPDVNVAKALGGCGIHNAMLYVRALPSDLRRWQMENWTWEKALDIYLSIEDFDGPNSSYHSKQGFIRTSPPALALDMSREFIEACVELGIPRTADFNAPDGRYGAGYYHFNTRDGVRESAAKAFLGPILDSKTAESKRENFRLMLDTTVTRISINDDNVTEGVEVRFGNDTGQLIRLAEHGEVIVTAGAINTPKILMLSGLGNQDALKKAGLPLKKHLPRVGMNLQDHPVIGMVFEYKSPRVVDLKADLDSYFTATNAKHTNVSSFGLFGSAGLSTGAFLIPPGATLPEIQLTLFPRKSEPHMSNSAGLDHMTEVVVTIALLHPLARSRVVLIHDENDYVDDNDIDDHLIPRVVSEIPDAKPEHLRHGDVWKISWAIGVVREIAAKLGECAPAVSFTHGWLIYCWFDS
>c424
MAATAPVTDRSLSLTQIKAHIPITLDMNQMNYDIWRELFETHCHSFNVLSHLDGSLTSTGPEDTTWSQTDGTVKMWIYGTISESLLKLVLKTKCTASELWTTIENLFRDNKEARAIQLENELRQLQIGDLSVHDYCQKLKTLSDLLANVNSPISDRVLVMHLLNGLSSKFDNILNVIKHRSPACTFSEARSMLKDEEARLSTKRQVSSPSHDNASSPQILMASSAPAPTHTPRPNHNSAPPYPPNYPSSYGNRNARGNRGGRNQRGRGGANWQGGNWNNGPSQMSWNNGPSPPWAWSNNPPWPMSPPWQNQPQWPNPWSMPPAWPAYPPAPATSSQQPSFGLLGNNPRTAYLSTHNPVAVAQAPPPAPNSELIPTTLAHAFNTNTLSDPTDAGWYMDTGATAHLTAQPGKISTITSPADLPLITVGNGALIPATTIGHASILSPLRPLLLKNVLICPKILKNLISVRQFTCDNRCSVEFDPFGFVVKDLITRTPLIRCNSNGPLYAVSPPSPIAYPQAFLTSTSSTIWHQGLGHPGDNVLRFLSASGYPPNHRGYRCLDLTSRHIILSRHVVFDEKVFPFVGTTHAPQPHLLAAPSTYPPIITSIPAAVQTPPATPKVAPNPQPEVDPTHQPEPTPTPEPPPPEPTPPPEPTPPPEPTPPPEPTPIPPPPAPSDAAPAGPPPQRMHTRSRSGITKPKQILSLHTDVISPLPTSHLVPRHMIPPNANIVRSMWLYTHKFRADGTLARHKARLVANGKSQQVGIDCEETFRPVIKPTTIRTILDVAVSRDWPLHQLDVKNAFLHGNLEETVYMHQPACFVDPSKPDHVCLLKKSMYGLKQSPRARYQRFAQVATKMGFTNNKCDTSLFILRRGSDIAYLLLYIDDIILTASSTTLLRDKHGLFLDQWNYAADILHRANMSHCKPCNTPVDTSAKLHADVGQPVADATLYRSLAGALQYLTFTRPDIAYVVQQICLYMHAPREPHFNALKRILRYIKGTITQGLHITPSNTTTLTAYTDADWAGCPNTRRSTSGYCLYLGDNLISWSSKRQQTVSRSSAEAEYRGVANAVAETVWVRNLLLEIHCPITTATLVYCDNVSAVYLSTNPIQHQRTKHVEIDIHFVREKVALGQVRVLHVPSSHQYADIFTKGLPSALFQDFRSSLRVREPHALTEGGFTYDHINGTKVGGTIFDIRGHRHSAADLLEYANPDKIVVYVNATVHKILFTTEGSSLDVLRQTHSTKSRAHFVQSMKLRLSGMSNSALILQKIDGPVSRGFLELQNKNPDDNPSVTFNYYQEPEDLEKCVKGLETIIKVLNSKAYSKYKYPNSTPLELLSLMQSLPINLRSRHETAVSNMTQFCIDTVTTIYHYHGGCQVGRVVDKNYKVFGIDSLRVIDGSTFLKSPGTNRKVK
>c425
MAATDRFDAIVIGSGVSGGWAAKELTEKGLRVLMVDRGRMVEHGEDYPYDGKPAFEIPARNRMPAAFTKSDYKGLNFWVQPANQPFFTNDRLNPYDFDAPNPFHWVRGGVVGGKSLTWGRWSFRWGPNDFEANQREGIGTDWPIRYDDVAPWYSYVEKYIGVSGGRENLDYLPDSEFMPPFPMNVAEKWLKERLEAEFPGRKLINARLSNITEDKPEQNRTRCQKRAQCDRGCSFGAYFSTQAVTLPAARATGRLTLRPDTWATNVEYDAAKKRVTGVRLVNANTGAVEVVPARMVFLCASAMGSLHVLLNSRPEGSERSHFHSNGALGSAVMDHIFKVNIGGDVPGMTEFVEYGRRPGGVYVPRFRNLKAEELPFKRGYGYQGGASRRQPAPEGFGAAMKHGMRTYGGWRFNMSAFGECLPYDDNRAMLNFSKKDARGMPLLRFDVTFRDNELKMMDDAQAEGERMLRQAGLTNVTSNRGTHIPGEAIHEMGGARMGRDPKTSVLNGFNQAHDAANLFVTDGAMMASVSCVNPSLTFMAMTARAADHAVRQMQAGVI
>c426
MAATIDDVKDKTFDYIICGGGTAGLTLAARLTENPKNSVLVLEAGDANIGAMELLLPASYGSQFGNDQYSWPHQTDIDAAIGPLDVAYPATIDVGELKVQQTFVNAGIPLARKPVNGDPAGTYYAPITYDPKTHMRSYATTAFYLPNKDRPNLTVLSSAYASRVLPSSQNASDFTAEAVEFRHEGEVYTARAAQEIILSAGALKTPQILELSGIGDPAVLRPLNIPVKIDLPGVGANVQEHFTLPISFEIRDDVPFETLDGLSDPEVLKKHLELRPTGRGAFTTGIIGVAFATLAQISPRADEIIKNAEEKIMQNAEKLSPALLEQYKMSLNRLRHGAGCEFVSCAGMVSKPNPAEPGKRYLSIWVAMNHTLSRGTIHSVSNDPEVDPEFDPHYFEQEVDLQVSIEMIKFARNLKNISPLKEMIGMSTLSPSTWCFS
>c427
MAATPPVPTIISSLPEFLEVREYDYVVVGGGAAGLVLAARLSEDPNVTVAVLEAGDARVGDANIVSPVGMAAVLDNPDYDWCFRSTPQPGNNGKVHHIARGKCLGGSSSINFLAYCRPSRADIDRWEELGNKGWNWDALSPYYRRSQRIAQGSLPLQGSQESFAHEQQFHGDETGVIATSFPSWRFPFEDPLLKALDEAAGGLARPVDPWSGDHLGFYGTLSTIDRTGERPVRCDAAAGYLKLMADRSNVRILTNALACRVILSEEAEGSPDTPIARGVVFSYQEHMYRVLAKKDLILSCGSIKSPQLLELSGIGDPALLEAAGIECRVPLPAVGRNLQEHPMTSVTYELTPETHTLDTLFADATLFGQYLQQYFTEGDGPVGGCMSLTGFLPYASHVSELRLEQSLTSETKNNIESEEITRTLSLLRDKATPSMQLTCVPANFSPETGHAHLNQVMPGAPAGRGPCYTILIANSYPLSRGNIHITTSDPFAAPGIDLGILRHELDVDVLAAGVLFADKVFQSAHVRDKVVARVSPPASVNLDSWEAVRGYARDQTLVFNHLLGTCAMGEVVDDRLAVKGVQGLRVVDASVIPNQMSGNIIATVYALAERAAELIRQ
>c428
MAATREFDLIVVGAGMAGIIAAARIAEQGIHPRTGDKLRVAMIEAGPHVLKGKARAGYGDPLNRKMIPQILWEEFGMLEEWPWQFGLKAVGGCSLHWGCHVHLPFPEDYSNWSSMGINWSRDHMKDAVEDITRNFHVEADPEEAYTRGERMFREGAQAMGHRIVPVLTTRKNCIYCGFHNDSHGCKYDAKATSLWYLPTAEANGVELIDKAEVKKVIIEKQGAGGVVKGVVYEKNGVIEEARAEKVIVSCGTWGSPLLLARSGYGPKDELGDNVIVENDNVGRNLDGDTSYRIPLYFPEPIKEPGRGTNSSLGFFLSDPNYTDGTGFVRISTAELSYINYPHISALSEFAPAFGKAHMDFMRTAVTRLGAISILFNRAPLHVKGRVNLRTGAQSYPGDPYIDKRMQEAKQVVIELAKKMGAKYSPRFPASFAGRGGGHTNGTCRAGSDRRNSVINGDFESHEVKGLFVVDASSYPRASVNSGLFAAIMGAYGARRIVATHFSRGAGA
>c429
MAATSGWDYIIVGGGLAGSVLASRLLQHSPSPRILVLEAGPDVSHRDDILYFESFNFVGGEFDWNYKSVPQKGYDGRQIALASGRALGGGSVVNGCAWMRGARADYDDWAAAVGDARWSYEGQLPYFKKTEAWYKDKNAENHGQDGALHIESPMSTGRHYPLADAVEQSWHALGVETIPEHDMNGGRNIGLGELNENRHKGARQIASMVYSLKGATVLTNTLVESILVDDAAGSPVAKGVRLANGEEYHGAQVILSAGAYRTPQLLLLSGIGPRDVLEQHGIKPKIELPGVGQNFNDHALLFLNWRLKDPSKGDALGSSHPHWTEPQFTTGMPASFVVSTIIPSDGLEAAIAEDGHADRDAYLLGSMHAMMENIVLYFGVPPQGPDGAHIATALMGMKPTSRGSVSISSINPADPPILDPNYFSTAVDRHVWRVSLRAIAALMTGDSTPLGRDIVLSEAPPGQSAPLTVDASDEYLDEIVKMRAVSMFHGSGSCAMGSVVETDLRVKGVRNLRIVDASVFPVSIGGHIQAATYALAEQAADIIISEGKLR
>c430
MAATSLNFFIDLLRPKKRTYKYSLDEEYDYIVIGAGSAGCVLANRLSANCGTKVLLLEAGGEDTKSEINIPLAPAYLQRTEVDWNFEIESQEHACKAQKGQKCNWPRGKVLGGSSSINYMAYIRGCPVDFDRWAEMGAENWAWKDVLPCFEAVENNQSEPGLSVTQQRYKTPMSQAFINAGMELGYQTTPDINGKSMFGFGSFPATIVNGQRCSSAKAFLHPIKSRKNLTISLNTLVTKIEIVDGKAIGVHVQFDGNEDFIPVNKEIILSAGAIGSPHLLLLSGVGPEEDLKDVGIDCKVNLPAVGRNMQDHLTVILRATTTQSKMMINQTDANSLSSKLKYIFQKNGMLTTNGLEAVAFLNSGLEKSYEWPDLQIIPIPTYFPLGPNQFYLLNYEERYKAILDYDYTESEACDIEGITLLPTLLHPYSRGYIKLASNNPTAPPIINPNYLADQRDVDVLVKGTEICEKIFSSDSFKSFGHEFKFPEFPDSPPDKASEEYRQHFVRYMASTVYHPVGTCRMGAVDDPSTVVDPTLRVKGVDGLRVADASIMPEVTSGNTNSPCIMIGQKAASIILADK
>c431
MAATTFDYIICGGGTAGCALAARLKQGNPQSSIALIERGSSEVQHSPEVLAPLGFAKAPELGIAKIHDSVPQAALNGRSIGLWAGNMLSGSSGVNAGLWMRGDAKDYDYWAKLVGDERWSYKGLLPYFRRTEKWHDAAGLKELHGFDGPMNTLVGPGYPLKEQVRDAFVELGLNENTGREDGDQSGILAHCENFRPTRQPAGVVYDLSQVHVVDKAVVRKVLIGASGHTGPRATGVELVDGRSFHATQEVIISAGSYGTTQILMLSGIGARDQLDALGVPTVIESPDVGRNMWDHAACYTCWRLKPEAEAKGFAFGSPDFMSRPGALEGLPVDWEANEHLSSPELTKALQEDGLAPDIVEGFGFAKRVTNWLSVVYMPIVTGPDYNVAVDGKVIGIGMLNYQPASRGTVTLRSADPLEPPDIDPMYLSAQYDRVLMRTAVRRTLLVAESKALAPYIDGEEVPAGYTVLNSKSSDAEIDDRIRKCLGTIYHPAGTAAMGKVVDSSLRVKGVEGLRVCDASVFPAPISATTQATVYAVAECFADMLLREGMAAS
>c432
MAATTGSAIACDIAVIGAGLAGGLVAADLARAGLSVTLVESGPPQPPPPRPSGRLARLGAILADPRAAIAPGRWPEMLLVEDPARPGRVRALPPVLGHGPGGSATLYGAALTRLRRCDIEADYRPRDQDAAGAVLPNAWPIGFDELRVWYDRAEAVLGLVGQRDPGDPDPAPPLPAAPPVCPRDANLAGDLAARGCAPFRLPVGIAYRPGCTECQGHACPRGCKADSLVRALRPALATGRVRMLCALTARRIARRDGMLVVEAVDAAGQVAELAARRVVLAAGALNTPRILMRSGGLWGRADPPGLLGAGLMFHISDILAVFDRRDGEIWGPRKTICLRDFYRHGGEPLGEVQSLGLDVTPGQIAAYLAEEAAALGLGRIRPLVMLATRAPAMIAARLFARAHLLATILEDLPLAANRVLPDPPGPPPAGPDPIRLRYGVTADVARRAAVMRRLVRAAFAPNRVRFLSRPGRPNWGHPMGTCRMGGSPGDSVCDPAGRLWGAPDIRIADASVLPSSGGTNPSLTIAALALRLAADLAAELGGQTLSGPAQASA
>c433
MAATVGYTPLDAPLFPCHEDPVFTDLQWESLLSLCDVVVPALTTEKKPKKPYQKTITAEEYDSAFKAITETLKTPDAAQTARQFLEENVSSNPLFKEALRRAFSLDIPQDSKNGLSLILTALNTRAGSLLLTGSSTPIQNQSFDAREKILNNWLTSRLPQLRQVGRSVILLSKRQWLINSPTSNEIIGFPRVPIYGKPADTFDYEFLQFPPGDGIETIEADVVIVGSGCGGGVAAKNLAEAGHRVVVVEKAYHYPSSYFPMTQGSALAHMYEQGGNAATDDGYMGVLAGATWGGGGTVNWGASLRTQNYVRQEWADTGLPFFTSAEFSNSLDRVCHRMGVHTEYEQSFQNKITLEGSKKLGYNAQIIPTNSGNKPHYCGHCTLGCHTVGKQGPVASWLVDAANAGATFIEGFKADKVLFDTVKGKKLASGVEGEWTSRDTHLGTTGKDATRRKVQIKAKKVIVSCGSLQSPLLLMRSGIKNSHLGRNLHLHPVLLGAAVFEEQTRPWEGDCLTTVVTDFENLDGQGHGTKIENVTMVPSMFLTALPWFDGLQYKKFAANLGRMAGFITLTRDRDSGRVYPDPVSGHARIDYTTSAFDRKHILEGLIAAAKIAYVSGAKEFHTSYRDMRPFIRSKDNTAETDINATDGGINDPAFQDWIREFRKKSPLIAEYGTAASAHQMGTCRMSNSPKKGVVDPDGQVWGTEGLYVADASVFPSASGVNPMVTNMAITDWTSRKLAKAMNRDKLSQTGGARL
>c434
MAATVSSPLPPGLLASNRRVSGLMDSDVLSNNGVARSVTSRRVSSRKFKFVETTEVSSLVHSLKRRSGDELGTADELAPPEGSSYDKVLSWAQLFVERLHSFDEAIAEFAGDSYLAAQLAYGYCALLLELGQENASALMVSFGFFYSTSMKLGNLLERTELFSVSQEIREQLVLALADLVTLVASVSMHFHKAILGLTTASISIDLYKTFPGQIQTFRDRCEKISEAMWRHQLLRENLDLEKVSDPKAIKLWLSPEDRVLGNVAEQSSHLAHDREEMTCLWMAPYLARFLKSPLKALAIAGKPGSGRTVLASVIVDQLQHTIGGVSYATLFVPINARVPAEATPRAVARSILYQLFDKRIGNVQLLQILSVAHERSKKATNEQDYDSLLWNALEAALSVALPGAKELVIVVDGVDEASCSETAMLNQLATATAKGSNVKLITLGALKPPTAADHAFVQITEELIFDDVAAVVRDQLQQSRVFLGMSELDQETIVGRITEASQGSFLWGKLATKRVRYEETEDSLHKAVDALLSAKLTLADFVLQLLQGHNVTEDAKNMLLWLITADRPLLLKELELLASIQVDKLTVADRKLDVLQVLKPLNGLVFVQDGQVFIRHGLFRASLLDIFSKGKLVSTVKDRHADLVTRLLIYIRATVTQENELSLVSLDWHDTDRLVNRNPLLEFAVRYWVHHVRQTSAFTAKSEVAVAKEFAKILPASITTLRLESTLWGNAPTPTLLLYLTTVTNIYRQMLSANHVVTLQSIIFLALLNQRLEYTSEAIPLFFEAATLSRTLLTSRHIVTMQMARTFVELTQQRTTSTKTEIMVKREEVLLLLVECYKRHYGEHSETVVTVLRQLIDHYTLIKEEEKVKEITISIESITTHHHGHGSNGANGGLEIHLNKGSAGPIDIGVGFSLDYEEGDEVIQESESYNVEEWIKKAEIYVAEGKVELAERTYVEIWQRVSREYRTHYSAYWEERKMTTVLAYSKFLVSQKRAYEASSVLSSLWQEYEQASISISETSVSYFQEVAKMMKLVGISDVALLVYKRCSRYYESINSTHSSTYKEIQESIRTTSKEVVKSFSSSSTVISETTIEEIFIGGSSSTETIEESSFTALHRSLELYISQHRWQDAARLLKKILRLVWPSLFAPSVQDVTLPEKHVDHCVELAARLGLCYHFRRRLSKEEDIRLRVYRAVRAERKVEDKLRERATAELLRFFEHTSQTEMIINLRQEMLSDYIEAYGAEHERVIKILWVLAELTRPRPIFIEYYQQIIRALNKDSQVCHPEAIEPMVIVATELWNQGRYLDALAYYKVIFNTFLTQPKLGPKFQVQEFVQELFERYTRCLRSVHAEFTVLHKVTVEYRARCTAVFGVAASITIRATLTLAKLCQESKRFLSEAITLYEELLKIESAELDRDEISVTLDGLSEEQDESSSSSAHSERTFKVMRKRITTVRETHGWAHEESLTRMKEMITIYTERKETETVVRELTEATVQILMSETSSTRLIAAASTIASCYIEAGQIQKAVELSHEIYRQIVMKEVVNIESVQFDLSSKERKSLTFLAQLEYILRRNTSVTVTEILAALTTEYVYFEEFRRLITSKSSSIQTLTVSAARLYHFLVANGRQAAAARVFDDFLGYFAATEGKRVALTETSRVKILVITILDHFSTHHSHDFVRSIGIASIHRVTELLKDQRYEAACDLALASFKYLSAHESYRSPAIVKFAFILGMTISGRDVVHGPDDAIRKKLLGVSAVIIQDALRVIDGLKIDLSQIGLHHLNNLIGLLGEQQDYQTLAWLLNKLWNSREAQRTWKPYITLALGRRLVLARYLVGDSMAAVRLAEDIVYNCRRVHGACHPATLDTSVLLSQLYIGVGLRYQSHKNGQEMANRYYKKSAALHENLLRIFSDPSFAELECGLDNSMSLDGSAYDLDLGEPVGHVPDGEGVRRHLYLLKLAVQRLGDWPKDYSEYERLNADLFREFASDLKGVEGVEKWDLKAFGAGKAEGNADVLETEFKGWEFLEAPAPVEGRQQSALIYGPSKHSIHSRQCGDPIPSHPLHSIRSYFLTTSTATTSSAEADYLIIGGGTTGHLLADRLSSTPTTTVLILDPGDDTRTNPNTGPTPPRPSLTPSNRTLSYTAGRILGGTSMINGMTYLRADRPEIDAWQALGATGRTWETVWPYYLRTDKFS
>c435
MAAVDTSVSAGVESAEYDFVVIGGGTSGLTVASRLTENECIRVLVLEAGQNRLNDPKITVPGLAASTYSDPDYDWCVTSEPQVHLNGRSIGQPIGKVLGGSSAINLGMLMYPSQSDFDSWEKLGNAGWGWSSIAPYFRKFHTFTKPTGEELREGLMLDYMVEGAQGDSGPVQVSFGGADGSAPFSKAWPRAFSALNLEMTGDPITGIASGPLSACPLPSSFLPLYDQDISPVDLSELFSAHLSDADLPANLRAQYDVLKAQLSSPGNASVQYTLAPFQITPSAGASPKDFLSMPVPGFYASIVSVLNHPFSRGSVHVKSSDPRAAPAFDPQAMSHPIDLEIHARHLFFPERLRATPPLADLFKEGGQRIHNGGKAVETMDEAREMREHPV
>c436
MAAVGQGHDYDWIVIGSGFGGSVSALRLSERGYSVCVLESGRRFASTDLPTSGWKVRDLLFAPRLGLRGIMRMSLFRDVAILSGAGVGGGSLVYGATLYRGSEEFQSRLTDAVGEHVDLDPHYREAERMLGVVDNPRLTPRDAVVKRAADRLGYGETCHPTRVGIFLGQPGVTVPDPFFGGQGPDRTGCLGCAECLIGCRHNAKNSLDKNYLWLAERRGTRVEPEMQVSEVRPVGAADGSDGYAIVAHRPGVFGWRKKRVIRSRGVVFAAGAIGTNKLLGDCKVRGMLPLLSDQVGEQVRTNSESLTALTPRDRNVELGLGGVSITGSAHPLPSMHMETVAFGSGGDSMKFLFAPLTPNGTRVTRPLKMLAAIVRHPIDAARVTNPVGWSRRSMVFGAMQDIEGKLSFETRKRRLGLGTRMNTRPDPLHPIPTFIPEVHEAIKLMAEELDAVPQTLVPEALLNTTVTAHILGGAVIGTSPDNSVIDGNHQVWGYRNMLVCDGSTVPWNVGANPSLTIAAMTERAMSTVPVKSAEPAGSVSEQLI
>c437
MAAWDYIIVGGGSAGCVLASRLSEDSNTKVLLLEAGPHDRSMWIDIPAGYTKLVNRKKFNWNYYIEAEDGLAGQRLSYPSGRVLGGCSSINGMLYVRGQPLDYDTWSELGNPGWSYEDVLPYFKKSEHYEGQGNDSRGKAGLLHVCDPEERHVLGEALIFAAEASGFARTNDYNNGRQEGFGYCQATIKNGRRWSAVRAFLDPARRRPNLRIETDALVDRVRLDGKRAVGVAYSVHDGKREVRCNREVILSCGAVQSPALLERSGIGQPALLKRFGIAVNHELKGVGENCRNHFAPRITWRVNRAITFNEKTRGLTFLREILRYYVSGTGVLTRPAGLVFGFVRTSPGLETPDVQFTMAPASYDPGRPGCLEREPSLTIAVSQCRPESHGSIHIKSLVPGSQPAIRSNFLTAGTDRACIVAGMQVARKIMSHPAIAKYIALECRPGDRVQSHDEWLDYARSTGQAMYHLVGTCKMGDDLMAVVDSRLRMHGLSGLRVIDASIMPTVPSGNIHAPTIMIAEKGADMIKEDAKDCVKPLP
>c438
MAAYEETDVLIIGAGPGGAGIALKLAKAGVNVVCLEQGPWVQPNEHPHYHDEWELEKQRGWAYDPNVRQLPEDYPVTGTTTPYMMNNVGGSTVHYAGHWPRYKPVDFRKGTEHGLEGTIDWPISYEDLAPFYDENDEIYGISGRIGDPSYPDRKQAVRDPEVLPGKLGLKYAKASRDLAWHWWPSDNAIITVDRENRKADQATGNELSGSPTGSLSTPANAHWPFAIRHGADLRTFARVETINADGGKATGATYIDRRTGDRHEVRAKIVVLAANGIGSPRLLLQSAQKGHPDGLANSNGIVGKYLMHHVFAFCDSWFDEPVEGFKGAFGAPLYSHEFYHTDMDRGFVNGFGMQVARSFGPAYAAMGTHTGYTAPWGEKHREFFDGHFANHLMVFMFGEDLPVETNTVTLDPDVKDSSGLPAAHVNYELHPNDVALAEYGIEKIFEATRAVGAVETNDTGVLYPPPAWHLMGTCRMGNNPGDSVLNKWCQTWDVPNLFVVDGSTLTTGGAVNPTSTIGALSQRTGEYILRNWDALVAQTTTPSNADAPEM
>c439
MAAYRADNRRGRYVGAAFAVGMILLNIFHMGFCAASASGATYNFMRNAMEAPTVSYYDYIIVGGGTAGCPLAATLSLNYSVLLLERGGSPYGNPNITNLAAFGAALTDLSPSSPSQRFISEDGVINSRARVLGGGSCLNAGFYTRASPEYVRDAGWDGKLVNESYQWVERKVAFEPTVRQWQAAVRDGLMEVGILFGTRGTSKPVAHGVTFRDSRGIKHRAYVRPGGAGEVIVSAGAIGSPQLLMLSGVGPADQLRAHNITVVLDQPLVGQGMSDNPTNAIFVPSPSLVEFSLIQVVGITRFGSYIEAASGGNFARLSSGRDYGMFSPKIGQLSTVPPKQRTPEALAKAVEDMSALDAAAFQGGFILEKIMGPLSTGHLELRTSDVDDNPSITFNYFKDPEDLRRCHRNSSTSLEQYCRDSVITIWHYHGGCQVGKVVDRDYKVLGVDALRFDLNYACSPDLSQEARKVLLPREWLNWGETSGLVQIKKPKRSMGYPKESVILSLFGGLLTGF
>c440
MACARPCGLAAERRSETSLLPRPSRRLSYIKRGNASIKAALRNHRPPRRVAGRYSPFLLSCPPQRPALFCPPVLSAPSLRKLPQGLYAPPSRLSMTPKCNPFNFPHQTALASLFPYPLSSAMPPAFARVVIALFVTLAGATTPPDLLIIGAGTSGCALAARLCVALPTRNITLLERASPRNSAADFLVRSPRQMWLAWQSSSVVEPIRTLPSSGLLGRAVPVFTGATLGGTSAINGMQWVVPRDGSVDTWGIRNLTTNSARRYYQRAFRTIGFAAQIPPLRQRHVDAFLGAARRAGYDTGNKDPFDPSEAFDFFENRMAIDLAGVRRDSCTAYLSPVLNTKCAHNLRLVQGASVTRLLLSRESRPRATGVEYTVSGSSAGERRTRKLRVAAGGELIVTAGPFGSPKLLQLSGIGPRDVLQKAGIPVRVGLPVGTHTVARPFAALDSEIQAPLEPSNNSTLLNDTAQRTLWDAGRGSVLGRSSFIANGRDRADAYLTGTGSFFPALVDRSIVSTNCNSNVALSRGFVRVTTRNASAPLDVQMALLQKRADFLRMQRCLLRLRRLHEELPRRFTAKWANPSDGQITERWIRDNAGWAGHMVGGCAVGEVLTDGLRVKGVRGLRVVDSSSLRNMPESAGPMASTYMLAEFMAEVIGKEIKDGSGVYQ
>c441
MACFDQLLLTTPIPMQMFLMLLGTMIVIYRPDIVDVENSVQSTKDLSSEYDFVIIGGGSAGCVLANRLSENYTVLLLEAGGNEEYISDIPYTVGSLMRTPYDWNYTTVPSPNYCLSMNGHNCFWSRGKVLGGCSVVGAWIYTRGNKKDYDSWASLGNEGWDYDNVLQYFKISEDMRDEELVNSFYHGTRGYLPVETFKYNAPIDDCILRAGEDMGYKIQDLNGANRTGFSLQYGTLRDGLGCSTAKAFLRPISKRKNLNVSLNSFVEKILVIEDSGSKVAFGVLFRRDQQLFKIKAKHEVILSAGSINSPQLLMLSGIGPRKHLQEMNIPVVHDAPGVGQNLQDHVGMTGISIIIDPSNEINQSASLTTNCTAVADMESIIELMQKNCSSPLYSNVLSGGIAFVYSKFADRKTDWPDIQLEFSSCSDYSCLIGGLYNMKEEDINALSKNIADVQGYGVSPQYVRPESRGYIELNSSDPIDPSKIFPNYFKNPRDLETLVASVEIIKEIVRTPTMQKLNARLNTNKLPECSQYDISTDDYWRCYARHATATNFHSVGTCKMGLANDSYAVVDSRLRVYGIKKLRVIDASIMPHIVSGNTNAPTIMIAEKGAAMIKEDCS
>c442
MACFIADPRHPKFEKSMGGAAFLAGLLRPVSKGTVRLRSPDPSDHPVFDMQYLSSPADYLVLRQALRLCMSIAAEMRASGYDFRDVVVPDDMDDTTLDAFINEGKTSLFHYSGSCRMGEEKDPAGPGVVDKALRVHGIRRLRVCDASVFPHILAAHIQAPVVAMAEKCADLIKTANLS
>c443
MACFSSSTRLMSSLCSPLLHHRYISTVVNKNTPSYSYVIVGAGSAGCVLASRLTENPSDSVLLLEAGPKDKHLGSTRLSWKIHMPAALTYNLCDDRYNWFYHTLPQAHMDDRVMYWPRGRVWGGSSSLNAMVYIRGHAEDYNRWQSEGADGWNYDHCLPYFRKAQTHELGPDRYRGGDGPLHVSRGKTQNPLHYAFIQAGQQAGYPYTEDMNGFQQEGVGWMDMTIHKGQRWSTASAYLRPALSRPNLSTEVRCMVTRVLFDGARARGVEYQQNGQIKKVFAEKEVILSGGAINSPQLLLLSGVGNADELKTLDIPVVQHLPGVGCNLQDHLELYVQHACTQPITLYRAQKPLQMLKIGLEWLLKFTGYGATAHLESGGFIRSRPDVPHPDIQFHFLPSQVIDHGRVSSKIEAFQVHVGPMRSTSVGWLKLKSKDPRDHPILQPNYLSTETDVLEFRECVRLTREIFAQQAFDEFRGPEVQPGPAVQSDAEIDAFVRQKADSAYHPSCTCKMGRPEDRMAVVSPELRVFGVEGLRVVDASVMPSMVSGNLNAPTIMIAEKAADAIKGLPSLHDPGVPVYQPRKHP
>c444
MACKRKKKSLTPYYKIVKEVLGSRPIPLNDDPRREIVRTVLYQKFAKHAGRESKLADINVFFGNDFKKPTPIGLQEKNRYGAVQTSCTYCAECDIGCNTHSKNTLDLNYLFVAENKYKAEVRTEHLVQKIVPLGPDGNDNSSYHGENGYRVYFRDLSGQKRELVSVFTKRVIVSAGTLGSTELLLKCKEEFKTLPDISDYLGKQFSGNGDFLSFAIKGKEPANPNYGPVITQYTDYNLFKSYNPKRAFILQDASYPVFASYFAAASVPWFLRIG
>c445
MACRIFGYAVPMLRYDYVIVGAGAAGAVLAARLSEEPGRSVLLLEAGPDLVGDAGPEALRTGSVEAEDGFDWDLRATVVAGREAPLRRGRVVGGSTRINDRGAMRAPAADFVAWGRALPEWDWPAVLPAFRRLESDKQFGDRDHHGADGPVPITRWSRGQLTPAMDGFLEAVLALGHDYQEDMNAPDAVGIGMYPQNRRDRLRMSTALTHLDPARSRPNLTVRGDAEVERVVLADGRAVGVRVVGGETIGAGEVVLCAGSPYSPALLLRSGIGPADELRAAGVDPLVDLPGVGADVIDQPGAIILVVPEPEAVGGDWPRTQLIGRLAGIPGHAADQAFYLSLFTGMSTTRGAGAGLDRMVGTDLINTVMIGDMAMASRGRIGLRSADAGTPPVVDLDFYSADGDLARMRDAYRHAWEIANQAAFTKTVARFALVDDAVVGDDEQLDHVLRNTTYSRLNLVGGARMGPSGDPGAVVDGHCRVHGVPGLRVVDASVVPVPLRAPAALTSIMIGERGAELIRG
>c446
MADADLIIVGAGSAGCALAGRLAELGHKRILVLEAGPSDAHPLVRMPFGLVWLMGSGRDWSYRSTAQAHAAGRDISVPRGRMVGGSGSINSMVWFRGQRSDFDGWNVPGWDADAVWPSFEGVEAAVRPGPLPDPHRLTRDLAQIFPGQSVPVPEAESAGPFRVNMRRGRRWSAADAFLRPALRTGAVELRTGCEVDRLIFEEGRAVGVLLGDGRRVRAARGVVMACGSIGSPAILMRSGIGPAAHLHALGIEPLADRQEIGRNLHDHPAVPVFHEGAGSGYGLTVGQLPLWALAPLRWSLTGRGRFASNSVEGGMFFDASGQGGAPDCQVHFIPARLGHKGRAIGWGAGYYADVCLCRPKSRGVLQLKSPDWRTAPDIDLNLFSVDEDLEVLAQGLARLRSLLAQAPFGKRHAPEVFPGPALKGHDALREDIRARCGTAYHPVGTLRMGKESTAPVAPDLRLRGVEGVWVADASIMPNVTSANTNAPSMMIGWHGAALMT
>c447
MADAEVIVVGLGAAGGVVASELVDEGLDVVGIEAGPMPGTHDQDELRNVIDARLSNTVHDTPERYRGYDDTGADAGTTGKFNLYGRCVGGSSVHYCGVMWRLLPEHFNMRSEFGDLDGANLADWPVDYDDLVPYYERAEREIGISGPDGGQPTHPDSWSYPMEPVPETRSGELLADGADELGYEAFPSPQAVLTEEYDGRPSCTYCGHCCFYGCYVRGAKSNSLVAKLSSTLTAENFDLRDECVAKRVLVDGQGRVTGVRYVDKADGTERDLTADAVVVSGNAVETPRLLLNSASEHHPDGLANGSGQVGRNLMFHMDNTQIFAKFDEPTKQNRGTWSNKAVDDFILANRIDEDVDFVTGSNLQLASINAPMLYGGNWKQLYAGGKTPPGTPRWGDEFMAEMGDFENVVWVWAPVEDVPRERNRIRPDPNNRDEWGIPGVDITFENHPQDFRAQSYVVDRCREIFEAAGASEVWTAGTDIHHRGSSHLMGTCRMGTDPETSVVDSYGRAHDVDNLFIVDGSPFVTSAGYNPTETIYALAFRTAEEIATEWV
>c448
MADENYDVIVVGGGSAGCVAAARLSEDPNRKVLLLEAGPDPQPLPELVADASKQTRLLLESDFVEMFPTQRHLDGSTYYALAGRIMGGGSSVNVMSVLRPQRYDLDQWVAAGNPDWSYERCLPFMKKIESDQDFPDSPLHGKDGPLYVKRNFMLDMPAAPPVKAFLDAAYGMGLPKCPDLNVPEPYGVCASPYNIKDGKRQSTVVAYLEQARGRKNLAIIDRATVHTLRLSGKKAEGVNYERDGQMHTALGGQILLTSGVYGSPQVLMLSGIGPAAELKKFGIPVVHELNGVGENYQDHPVVFMTYEGPKESKVDWVVPRFRLIIRKNPISEAANFHINMRPPTEVAGLKRMMPVSAHLLEQRNRGRVFLQSSDPHDQVGIDSCMLEHPEDLKAMVEAMQFIDELVRQPQLKEFYGPLIQPGPGEDWGEFARKTYDSYHHGVGTCKMGPSSDNMAVVDQRLRVHGIQNLWVGDASIMPVVSRANTNLTSIMIGERLADFVQEVA
>c449
MADEVYDFIVVGAGPSGCVVAGRLSAHSPARVLVLEAGGTGSGPLYRVPAAAALSMSRPASNWNYRTEPVPGLGGRRLPWLAGRVLGGGGSINGLMFLRGGRHDFDRWRDEAGCPGWGFDDVLPYFRRFEGSVRKGDPWHGTEGPIATSPALPLLPISDLFLEAAQEAGLPLVDDLNAGMAEGAGLFDIMAAAGQRSRPDRAYLSTRLQGRERAGSLEVRTRTRVLRVDVAGGRACGVTYLHRGRVVRARAETEVILAAGAINTPQLLMLSGIGPAGELRACSIAPVLDLPEVGRNLQNHTACFLDYACSPDVTARRFMHPARATGAGLAYMMRRDGILAQAPCQAGAILRADPLEPGADTQIILGPGIPRGGSGAFAALPGQGGFRLMVNHGRPASRGRMRLRSSSPLDPPLIEPGYFSEASDISALRAGMIRAREIAGAGPLARVIDRPLSEAASISASSDPEALIRRTAVNHFHPVGTCRMGMDEGAVVDTNLRLRGLEGLRIADTSAAPLLVNGNTCATALMLGERAAALILGEEEEGGF
>c450
MADFDYIIVGGGSAGCVLANRLSADPKNKVLLLEAGGKDKSPLIHMPAGVIKLLGGTKANWYYHTERQEHLDGRSLFWPRGKVLGGSSSINGMIYIRGHGRDYDQWRQLGLTGWGYSDVLPYFKRSEGNEGAIDAFHGGKGPLIVSHAERTNPLFEAFVEAGVQAGHKQTDDFNGRQQEGFGPYQLTIRDGRRCSAAVAYLRPALGRPNLAVIVEALATRVIMEGRKAIGVEYLQGGRRHTMKAAREVILAGGAVNSPQLLMLSGIGPAAELKRHGIDVLIDLPGVGKNLQDHLDATVINRCLLPITLHSQSKPVAQTLTGMQYLLFKKGLARSNGLESGAFIKTRPGLEIPDVQLHFLAAVMQDHGREKSPGHGFTVHLCQLRPESRGYIGLRSADPTDHAIIQPNYFESEVDRRTMRDAVRIVRDVLKQRAMQPYLGVELEPGEAVRSDGELDSWLRAHAETIYHPVGSARMGTDSMAVVDERCRVHGVANLRVVDASVMPTLVGGNTNAPTIMIAEKISDDVLGKAPLPSEAIRIAEDEDDSTRQSFAR
>c451
MADFLILGGGLTGCVLATRLKEENPSAHVTLLEAGPNEHENPVVLDPMGTFQMHNSRYEYNYATVPQKGYDGRQVYNAGGKQLSGSSAVNFAMWTRGSVSDYDLWAELAGDERWSYDGMLPYFRKTETHHDPKTADPEQHGFEGPILTTAGARIYPLTDTMHTAFLKGTGLPAITDANSGHPIGVAPYTENWHPKGYRQPAGRAYGLKGVEVVTNAQVHRIILDGNVAKGAELVDGRTFTARREVIVCCGAIRTPQVLLLSGIGPAEELARHGIKQLVDSPDVGLNFHDHIAMCQFFNIKNPDNLGLVAGSPLWNDPSYLLGIPADIVITDTAPPKELKAAMIADGEPNVTDSHPHLQTNRGHLELLPIYAPTEAPLTNLNIPFDGTCITVGQLNLLPTSRGSVTLESSDPSAAPLIDPNYFATEADRVVVRQAMRHTMRSFETPEGQTIIEGEITPEGATALTSTSSDAELDARIKKTAATWFHPAGSAAMGKVVDADLRVIGAEKLR
>c452
MADFLIVGAGSSGSVLAARLSALGATVTLLEAGPAWPHSAVPAELLDPATLPIGPDSRWVRHFPVDVGFGITGDVPRGRVLGGSSAVNGAYFVRGTPDDFASWPAGWSFDEVLPYFRRCETDHDFGDDFHGRSGPVPVRRQAPDLLSVTCAAFTQACLDAGHDYCADHNAPHAHGVGPIPLNVDNGNRINTAAVYFGSVANHDNLRVLGATRVLGVEFDGTTAIGVRAVRDGVEELIAADQVVLCAGAIESAQLLLCSGIGPPAQLREHGIEVVAPLAGVGARMADHAEIGLPYWLRAGLRDGDGPILQAMLNDSTVELRPYTRSFDHFADHAVESRRVLGLALMAPE
>c453
MADGEMDTERPGINIIKTPPPLPSPLLSNTNMPIYTSPSHLPASLSPDVLLLGGGTAASVVAGRLARCTPAPTILVVEAGDNNQHDAHVTSPGNYMQHQQPGAPRLKRYVSTRASEFLGGRQAALPVAQSLGGGSSVNFMMYTRASGSDYDAWEAAGWDAQALLPCLKKFEDWHGEGDGETHGRGGPIGVGYGGWREERLMLQLEEAVVEMGYDVVADANDLKTGNAFQKWMKYIDPATQMRSDAAHRYLHPLIPTHENLHILCNTTVSRVLFSTDSLVPRAVGAEIVPSPAEHFSTEPPPSPPQTVLAKKLVIVCGGALGSPLILERSGIGGTAVLQQAGVPQLVDLPGVGEAYQDHNLLLPAFELDSTIQTHDKIFSSLSTGPPSDIPTGQMGSNALDFGGKIRPSPAQLSRMPETFQQYYHEAFTPHPDKPLAITIPIAALLAGHENFPPDSRFATVALFTGYPVSRGRVHILSPSAYAHPELDAGFLSSELDVPPLMWGYKVLREMMRRVRSCIGEVAGGNPVFPSAKVRYERPEGWTPAVVRDVVYTDEDEKELECWVRANVLTTWHGLGTCAMKAREDGGVVDAKLRVYGTEALMVADMSIAPGNVGSNTNNTALMIGEKAAILAAEYLGIELS
>c454
MADGVELMMTMISMISTMWPPQATVYDGCAFDFIVVGSGAGSVVANRLSERSDFNVLLIEAGDIPDDDTRIPAKFGSVINTPWDWNFTAEADATSVSQEKGRFSVPHGKLLGGTSSINHLFYLRGDPADFNEWADLLNDPSWRYDNIVPYFNKIENKKYEPVMNSPRESIRSNGMMSITSQPTDVSKRYIEAFDEVGYPANPDMNGGNIMGYGDTQYHSDVVRQDTAMNYILPARNRPNFHLLKNAFVTKVIIENKVAIGVEVVLFNNEKIIIKANNEVIVSAGVVNSPKLLSLSGVGPKEVLEKYGIPVVVDLPVGENLQEHVVVPVVHKMEYSTAKKTVVSSDKLPFPFLLGSCSLNGQAPPEYQTTVALLEHDTDFLMALCSGVFGIKTETCTMLVDECAGRDVMYSFVTIYKPASRGSVTIQSADPYVYPKIKFNFYENKTDLTNMVLYIKDFLSIGNSTYFKNAKAELIMPELDDCSGDYWECYTMQNTVHMFHPTSTCPMGTVLDSKANVKGLKRLRVVDSSALPSITRANNLAAVIMLAEKISDDIKNSYPRC
>c455
MADGVRMTRAKVEHAPNCDIVIVGGGSAGSLLAARLSEDPDSRVLLIEAGEEPTDPDIWNPAAWPALQGRSYDWDYRTEAQAGTAGRAHHWARGRLIGGSSCLHAMGYMRGHPSDFQAWVDASGDRRWGWDELLPVFQAIEDHPLGGDGIHGKGGPLPIHLPADEVSPLARAFIEAGASLGLPRLEGHNSGEMIGVTPNSLNIRDGRRVTAADAWLTKAVRGRKNLTILTGSRVRRLKLEGNQVRSLEVVGRQGSAEVFADQIVLCAGALESPALLMRSGIGPHDVLDAAGVGCLIDMPDIGRNLQDHLLGAGNLYAARKPVPPSRLQHSESMAYMRADSFTAAGQPEIVVGCGVAPIVSESFPAPAAGSAYSLLFGITHPTSRGSVRISGPELGDRLIIDPAYLQTGRDRERFRRALEASRTIGHRDELAGWRERELLPGTPNSAAEMDDFIARSVITHHHPCGTCRMGKDPDAVVDANLRLKALDNLFVVDASIMPNLTAGPIHAAVLAIAETFARQY
>c456
MADHAGPSSSFSSIENQEFDIIIIGGGTAGLVVANRLTEDANTRVLVIEAGGDKKNDPRVYTPGLMSLLYGDPEVDWDYLTPPQPGLKGRQLGHSKGKMLGGSSGINFAALFYPAKVDMDTWASLGNPGWESGSALPYLRKFHTYHAPTAATTDVIKLDYLDHSIQGTDGPVQASFGDSFSPGNQAWMDTFNALGYKINNDPITGQAIGPFTNNHTVHPDTRERSYSRVAYYDDETAKRPNLHVLTEALVEKILLAGSDGFVTATGVQIRTKDGEHHTITAKDEVILSAGSINSPQILELSGIGERQRLESLGIPVVIDNPNVGENLQDHPSSHISYELADGIMSADALINPEISKQLVELYESSRAGPLGGTWLSGAYMPFVDADGPVNDEKIRELIDAHIDEKNLSPRLKLQYKLLSEILRNPKESSGEYLYLPFQINMRQVLSLSDIMNKKDTPGQFITLTVMLNRPFSRGHVHITSADPAVKPIFDPKLLSHPLDAEILGRHTQFIEKIASTEPLASLIKKNGLRIPSGRTAHTLEDAKDMVADRVFTPYHPSGTCSMMPRETGGVVNERLVVHGTRNLRVVDASIFPLEPLGNIQSVVYLVAEKASDIIKEDRKQ
>c457
MADHLDVTIMHAASSRRPIGVAPSFLPRGIGGLFSYIFRRKGFLTSNVAESGGFIKSSPERDRPNVQFHFLPTYLKDHGRKIAFGYGYTLHICDLLPKSRGYIGLKSPDPMGDPLIQPNYLSDPEDMGTMIAAFKAGRRILEAPAMSAHSKYEVHPGKSVQTDDEIAAFIRESAETIYHPVGTCRMGADKDSVVDPSLRFAVYLGCEWWTHPSCQALSLETPTPRPWSSLRMRPISFWGRCVFLTGAGMLPKKSYENHEKPASCQGCDGFVVRNCKPRLAACEPTRPTKWPLLNTNPERKLNARTNDGDALTIHSLIDHGARYHGNTEIVSVETDGTKTKTNWKGISDRARQLGSALTKLGLFKGDRVATIAWNNARHLECYFGISCGGMVCHTINPRLFPEQLVYIINHAEDRVIFFDETFLPIIEGIREKLTTVDTFVLMSARDEKTAGKIPGLVFYEDFLATGTKTPIGWMSTRMTHPAFAIPPAPQATPRVFFIHTALRCCIPWARPFPIR
>c458
MADIEADVIIVGSGISGALLAAKLSYAGVKVAILEAGPKVDRGQAMQRFWDAPIRVLECPYPPSPQANHPISNDPDYWYRQIGPNKFKSTYLKVVGGTTWHWLGTCLRFVPNDFRLSTVYGRGVDWPVTYDDLEPFYSHAEDEVGVSGDSNETLGSPRSTGYPMPAIPQTFMDQAYARALVGTQFEVRATPQARNSAARDERPACCGSASCIPICPVQAKYDATTAAADLARLGLRGPALDDALRTQACRQLHLTSLIEQLPDPQNRVTLDPTDLDIYGVPLPRLAYSLGTYVEAGLAAARDAHAEIFGRLDATEIQHRDVAEGAGHIIGTARMGSDPTSSVVDRDLRSHDHPNLFILGSAVFPTSATANPTLTIAALSLRAADQVKATLTH
>c459
MADILWNLDDTLSAEDAHKIFTQAEEKVHSMPYKTLSVDDLLSEKESLGGHGRRHGRDSFDYIVIGGGTAGLILASRLAQNDPTITVCVIEAGVLRTDCLITVPGLFGKSLRKPEYDWSYKTVKQPELHDKEVLCSAGRVLGGSSGINYMIRMRASRHEYDAWSQFAPDQGWNWKGLLPSFKDQEQYVRPRWGSSQVFPGVTQEQYEAAKKEEPLYRGYKGAIWSTHNEVYTDLLVPTIKTLNSLGIRTNIKPSHGDSTGMFNIDTAINRTSGERCYSVDALKVSSEAPSPIPNLLVLTGLHVNKILFKPTTHGKPVTADGVEVRATSKHTIHFYANREVIVSTGTYSTPRILEFSGIGNPKILKKFGITTVVDLPGVGENFQDHPTIVTDYTVKEGVNTLDRLRIDPAYKSAQIDEYLTKRTGAYATVVSAYGFIKLDKFLSSAEITELKAQLDKEIAQVTNEFHKKQLAIRRKYLDNPEVGDVEIIMVPKAFATIPPADKTSYLSLLTCLPHTVSRGSTHISGADPTAPPDINPNYLTSKFDTKVLVKVTQFLRKITQSGELANIVTGPSTPPASVKTDAEIENFIRHKLITMQHPSSTASMAPRELGGVVDSNLRVYGTTNVRVADLSVIPLHIAAHTLDTVYAIGEKAFHIISGKN
>c460
MADIPRRSALIGAALATAGAFLSGLSPAHASPPLRELRTRAVVIGAGLAGAITAYRLAEAGVQTLVLERGRRWAVSPAGNTFATTRAVDKRVFYAAGSPPLPGVDLPIEPYPGILEILPGDGMAVVCGAGVGGGTLVYAGATIRPREAAFGEMLPTVDWRTMDAEYYPRAARRLQATPVPDDVLAHPNWTGVRAFMKMGEDAGMRPERVLQTVDWNIVRQELAGERVPALSIGEYLLGVNSGARNSVDKTYLAQAERTGKVSVAPLHRVLDIGFDARTSRFTLTVEQVSETGAVLAHVRVVADAVFCSAGSVGTSKLLVAARETGTLVNLNEEIGRHWGGNGDEGWANLLTSSPIGVMQGGGISAAIRDDTNPARPTVLENVGLPVPLEMHVMGMLCMSVCPPAGEFRYHAATGDVTPFWPAGVEAADRAATRNLARTVGAGPNTSGAELSVAIDRAIRAIADQPGMSTQARGLMHLLTGAPTRSVNVGPLAPFTGHPLGGATLNTACDNFGRVDGYRGLYVTDAALIPGSTGGCNPTWTIAALAERCLDTIVQQDVGVVF
>c461
MADIRPEWTDPARTPIDFIIVGAGAGGAPLAARLAERGYTVLVTEMGPKQPPKPADAVVENTEVPLLHPEVTEDPRHALRFFVKHFDTDPTGSHDPKQYVPPQNSTAIHPEDEHGIFYPRAQGVGGCTVHNAMITVSGPSEDWDQITEATGDESWRGERMRSYFERVEHCHYNKPSRIRRILKKYFRVPTGWEDDRHGKRGWLNTTVADLGLLFHDWRLLKVVAGAAFGALRAGVETLRNLLRWAWLTDKSFPNLDPNHWRRMRTGGEGLLRIPCAISPDGTRSDPRARLFAVLANPHHGPRVQLLTGVCVTGIEFKTDVPAAVVGGVQTTLQAIGVRCVPQEHVYEADPVARTVDGWEAKQVRLYCRREVLLCGGAFNTPQLLMLSGIGCQKHLTEQGIETRVNVPGVGQNLQDRYEVPVVATVTGAFESLAGLGTTSHGKVGEDDPYLKRWREQPRHSAAERGVYSTNGGLIGILKRSNQEDSVPDLFIFALAGYFPGYHVGYSKPAAFVRQLTPAEAAKTLPPEEQAAQDAKAAATPKRTVTWLILKSRTRHHGGEVRLRSTSPFRRPDINFRSFPLGTSDKDALALADGITFIEEFLESGKRKGIIESYGCPGLSDPPFSGDRSKWVRSIAWGHHACGTCRIGSDADDDAVLDSRFRVRGVQGLRVVDACVFPRIPGIFIVTNVYMVAEKAADVLTEDHPLTNLPAECRAALADEPVMRSRPEYEERRVYPKELEAAEAALVWQRREAAYRAPAGAKKQPAEAP
>c462
MADKLANIGQVSDRLFDVIIIGGGTAGLCLASRLTEHAQCSVLILEAGKAHFNDPVVLTPAAWLKQIMVPEYDWAFKTTPQAKLGNTTGIWNRGKGLGGSSAMNFLAWNRPQREDIDALEKLGNVGWSWDTFYKYSKKAESKTTRRCGVWKPLEWLSSLESWSQLVQTWALSPSVSRYHTSSPPSNALLVRDEVKHYHCTLQVIKSAGRYTAISHDDTAGACTLTVPFYMIFTLSKELSLQQQTHVPLMKSILSGPSYRFIAPSEVPDGPYVDRYNADSVGQDGPVIVSFPKSVTGVEYAFQQSFDKYGMSGNTAGTWKSTSVIDPSTNMRSYSVSGYLLPVMDRPNLAVLTEAYVLKITTTKKHGLIWSHHRHWCRIRTRRNGISVSRPVVKSPQILELSGIGDERILDSFGIPVQHHLPSVGNTNVQEHLSHGGLIFEMREDAGIATLDSLRNPEIAAKAMGKFPLIQFPLSLVFSGLSFLPIDQFSENSAGIIEKQAAKLAEDTTERSPGLKEQWQLQLEALRDPNVPDCEAIFFPFFVVKLLFITILPTLSHPWSRGTVHIGSADPRGPPVIDPHYLEEEIDLDILVEMFKFVRKVAHTSPFSELTVAEVLPGPEIRSEEDVRAHVASSLSTTWRSLSMLPENKGGVVDSSLKVYGGTSNIRVVDLSITPLQIAVHTQAAVYAIAEQAADIVNAELRLK
>c463
MADKTSSALATLFIQLIRMMGHILMGDTSFKVDLRLQSPVYDFIVVGAGSAGSAVAGRLSEEGRWTVLVLEAGGQPPPEVSVPGLSAFLLLEGHQTNWQFRTTPQRHAQMNYHNRANPYPRGHVIGGSSAINYLMWVRGNRRDFDRWAALGNPGWDYDSVLPYFKKLETYRGEVTNLTAPYHGFSGPQSVEKRRHATRLTEAYLKAGLELGYPTVDPSGPSQIGFSSPDVTSHDGVRISTADAYLRHALHTRPNLHVLAHAHVIKILFNKNRRAVGVRFMRDNKFYRKYFEPLYGKTGFNIGPMLAVPKSRGSVTLRSRNPYDAPLIDPNFLSHPEDARVFIKGIRFALQIGNTTAMRALGAKFYDMPLPGCTHHEYGSDPYWVCFARHMASTNYHPVGTCKMAPASDPMGVVDPRLRVRGVSGLRVADASIMPVIVAGNTNAAAIMIGEKAADIIKQDWLITSHNFLSETPESYASDNKNNLRFYRVSIG
>c464
MADLGVLDVLVIGGGMGGCIVATRLAEHGVHPETGKPLRIAILERGPYFKGDRDPQPGYGIPFRRKLFTSVAQDSRENTRYTMASGFTQDEVDRGIRQRYVNTRRGDASAIGGGSLHWNCNTQVPFDLDYGAYAEETGVDWTAEKLRPASQEIQRLFNIHGRPESLLNPGDLLFRDSAKALGYNVIPLTIAKRNCIACGFCSLMCKYDAKMGPLITHLPLAEKLGVQIIPEAEVEKIILEKQGARVVAKGAIYRHQGATESVMAGKVIVACGVFGTPPLLYRSGYGRRDVLGSDLIVENSNIGKNVDAKVSAPRIQAVFAEAIHDGEYRDGSFDLFQDVHPQGYFDRLQMNFRVQRLAPTPDALARGRTAPEFGREHKEFMRQIYNSQGPDNATRAAQLKRGGFGVAVVRPSGVLGVMDAYGELQYDRKDPVLLRRLKDGYEIGHEILKKMGAKAISGSVGEVSVRTVAGITGSCRAGSDRSNSVVNSDFESHDVENLLICDASSPPRIASRGFGSPVAVFATYAAQRLVTKYFS
>c465
MADLTPRQRAVLAAICDTFVPPSDEGAGPTLHERVAGIVASLPDPKDIARLKLLLSTLDSSLVSLLLSGTPRSFAAMERETRVRVLRGWAESRLEQRRAGFQAVKRLVNVVYYTFPAKDRSHPAWREVGYPGPLPPPPGAARAARLPTLTVDRDTTLECDVVIVGSGAGGGVAAGVLAEAGKSVVVLEKGENLGPAEFTQVEGEMLQRSYLDGGMLMTQSASLPILAGSCLGGGTVINWTTSFPLHEPARAEWDRRSGLAVFESARFAESLARVQERSGVNSENSVPGVRDRLLEKGLRARGWHVDVIPRNATGCAHGLECGYCGYGCRHNAKNSTAKTYLADAVAAGGRIVVRCEVERVLKEGGRAAGVVGRVRTGDGRTVGLTVRARAVIAAAGAIHTPALLVRSGLANPHIGRNLHLHPVSAIGGLFAERIEPWSGNLQTRYSDQFANQDGEWYGAKFETGPVHWALPASAFGWESPARHKAELRRLAHISVCGILLRDRFGGRITVGRDGRPRVHYELSSYDARHLRTAMLGGAEVLAAAGAQEVFTLQQPPARATPGGPGWLDGFAARLDAIGIDRCRMALISFHQMASCPLGADPARGAASETGETFELPGLYVADSSAFVTSSGVNPMITIMAIADHVARGIAEGW
>c466
MADNENEYDHIVIGGGSSGCVAAARLVSEGGRRVLLLEAGYSHRHPLLDMPPGIFKLINCSKYMTYHQTVPQPHLANRVHDIAQGNVLGGGSSVNAQCYIRGRPSDYDEWDRIARGSNDGADWSWDTVLKHFTRMENNNRLQNHLHGVEGPLLVSDPGHVDAISRWFVQTVQEKGEPFNHDFNGETQRGVGFYQFMNRSGKRSSAAYAYLAPLAKDSRITVKLRSKVNKINIENGRARSVTYVDKAGVQKTAYSNSDIILAAGALISPKLLMLSGLGPADHLTSHGINPIRDLPGIGQNLIDHPEVPVLSLANGPFGYYKQAKGWRMLRNGLQFLLFGSGPITTTGFEAGAFINPTDPDQPPSIQAFCVPAVYLDRDLLQVFDEDYGVTITTVLMKPRSRGTVALQSSDPNDMPLVSPNLLKDPRDMNIMIDGQRYFRDVLQSGQLGKRIKTIIAPAEPDLSDEAMAAHCRKFVKTNYHPSGTARMGAHDDPLAVLDSRLAVRGIENLRVCDMSAVPNITAGNTNAAAMMLGDRCADFIMGTA
>c467
MADNGNSDPGIQLPTTHQAVAPDFAVSEETWQNLIKGGSTDFDFIVIGSGFTALAFIKETLKRNPDRKILCLERGDFWTLDHYQNLILPSKYTFGDSSETPPPTLTDANNNNLKFGPSQTLFFGGRSVLWSAWCPAPDISLLRGWPNWLKEKAAQPGFFTRAKKLLGVKESTQLGSPYEALQRQINTRLRDAFFWTAHAVYPAPLAVGPGKHSAIRYSNFSTPGPLLSLYETQQQRIKDGVDASLLFATGVAVEYLGVDVEHPNLSQDVSVELLRTSRGDLPIDPARTKVILCAGTFPNNTLLLKSFSGNPHVAEFAGKPRVTGHILSQTVGRVKRTEFSGLKANSIEIGAEYLEGQHPRTKSQYHIQITAITSPDPHQDAEDAARFFPDYAAAATAEQFDGSEDYVIFACITLGEVTARNSLGQPLSGDPASKTQLQLPLRDDDKELWDLMDSATFRAINKMTGGGPVEWWWKPKGSQLPSEWRLDQRPGPETIRLEGIIIHEASLYSVVDDEGANGCIDTNFNVKGVKNVFVTGAGIFPAVGSWNPTLTICAFAQDLARNLTPHVHTNNIFSDDESGRDSQDENSSLGDVIGARTDDDDTPYFDEPFEDFSEIEDLNKEYNEARKQYASDASKLQQLSDGFKETKKIMWSKWQERLQTST
>c468
MADNPRNNINLVIPFPFEASSAQVVGITSDYYIETVSFSLSFFPIPLPFSLYPSSVSTELSLAIIAEKITGPLSHGSLQLASRNDVKVAPHVGFNYFADPVDLSRCVSAVRKMGDLLNTNSMDPFKYKAFNGERGFMFLGPALPSNNSDDSAMEDYCRSTVTNFWHYHGGGLVGKVVDGDFRVMGVNSLRVVDGSTFILSPGTNPQATLMMLGRSGLTLSWQRRLLTTLCMRHKSATGIGSAISTITLKNTKKNQSFFTGGSVAGAAACESPFVAVVVPPLTSKSPLVVVRDSVHSSPFRHRIFERRQCWFFLVEDLGGDLAAASLLAWRQTPAVDLSPCCRPHAASFDKF
>c469
MADQAPYDFIIVGAGTAGCVLAARLAASPSKPRVLLLEAGGPNPSLKHRAAGERLTYWMTAEENYRYKTVPESGLDSRELVYDRGHGLGGTSVINMGIWDYGRREEYDEWARLVGDDVWRWGNVVGEMKKIENLHDDTPPELREYVPDQGEKHGDGGPVDVTYPSKWAPGVKMALDAAKRIGLPFADLYSGDLGIGLPANTTYNGLRTTASTAYLANPPDNLHISTNSVAERVLFDGKKATGVRLADGTTHLATKEVIICAGVIDTPKLLLLSGVGPADELARHSITPVSILPGIGRNLGDHCMTRVMSYAKPGTIPLASSADIASWKSQWEADQTGPLLDESALVALGFFKVDNIQSFPEFRELDEATKDFLTRPQTAHFELSLTILPIPDAPKPTIRTSVILMNALSRGRVSLRSAEADDPPILELGYLDHAFDRRVLVEGCKVARRFVYDSGLPAEEPLLGPKGWEDEEIEQYLRESVVPTWHGCGTAKMGMVGEEDTCVDSEFRVVGLSNLRVADLSVCPVIPR
>c470
MADQFLNADFGNLLPSSQLSITPAILISSFFLSVYRANAAYNPPTTDDVRTQYDFIVVGSGSAGSVVTNRLSENPDFKVLLLEAGGEATETTEIPLYAGLAFRSELDWNYTLAPSSQYCLGMIDNTCYYVKGKGLGGTSIVNTMLYVRGNKKDFDDWADAGNYGWSFEDVLPYFKKSEDNRNKEFSKNERFHSTGGELTVSDISWKTPLADPFVAAGSELGYPEGDFNAENQADSFNQRFPVGFKFKITGYGVTFLTDKNVTFRGDRYANSIANMTTILTRQLYNTRYLPIEEKEAFTIILALIQPKSVGRISLQSKNPFDQPVIDVNYFAEEDDVRRLVDGTKLAIKLMETKAVEHLNIKYHYVPIPLCPNAVPLSDEYFECLMRYEPIPFYHTTGGAKMGPKSDPTAVVDPQLRVRGFLARVVDVNNAKLYLEIPIQQL
>c471
MADQLRRRGPVLRQGWPTGKHLLPPFNARCGELLIKKGAEKLGIKVLAKPLAVLSQAYDGRPPCHYCGACNYGCDTRSRYSALEVVVPKLQGLPNFTLRPNAAVHTVLMDPATGKARGVTYIDTQNRLEYEAYGKVVVLAASLVESVRILFNSRDREYPQGLANSSGTLGRYLTEHVAFNDIGGFLPQLAGRPTTNDDGPGESCLYIPRYHFGHKANKKYLRGWRFDFYTGCGEGAGPGARLPGFGSAYKKKIKELYPAGVSMGGYGEGASTPTPSIHTRSRSWTKCTARSRRF
>c472
MADQNGEFVDGYFAVTHSNQAEQRVSAAMGYLDRDTRKRANLMISTNTQVRELLFEGTQCVGVKARVDGREQEFRGREIILSSGAIHSPAHLLRAGIGPVGHLKDMGIPVLTGLPGVGQRLMDHPSISLSSFVRRGARMNEHTRRHMQLGLRYSSGLSGVPKGDMFVVVLSKSAWHAVGAQIGSLLTFVNKTYSETGQVKLASRDPSAEPIVEFNLLSDRRDLDRLMSGFRKMAAVQMSEIVRKVTDKPFPAAYTDKVRKIGVVNTRNKVLTRIAAALMDGPAALRHYLIDNFVVEGFTFDDVMNDDEALEAFVRKATIGVWHASCSCRMGRADDPMAVVDNQGRVRGVQGLRVVDASIFPVVPCANTNFPVLMSAEKIAATMQ
>c473
MADQTALTRNPTARALTASLFPAGRTLPAADAEALLTRVGEHALLARALRLGLLWLDARHLLRHGRRFHRGDTPHRARFLDRLSRTPVSGKLLRAVSLPLKAHYVFDRDVEARTGCRPPVQVPSQVEHFRWQQQITAAGDCAEDMELEADVVVIGSGAGGASAAYELASRGLAVVIVEEGQYYDRSHFNGRLTEVIPKLYRALGSNCATGNAIIPVPVGRNVGGTTTINSGTCMRTPEEVLADWQARGLGDFSAEAMTPWFEQVEEVLKVQAAKPEHVGAIGDVIDRGAEALGFQQRHPLNRNAEGCDGQGLCQFGCPTDAKQSTNVSYIPRALDRGAFLFSGFRAERLHWHGDRVTGMTARGRNRDGRSVRLTVKSRAVVAAMGTFFTPLFLRDQGIRNRHLGRHLTLHPAGVVNAIFPDRDFANSRSIPQGFGVTDWGKQGLMF
>c474
MADQVEEMVEMAVPRKASPQAPLPAIDPLTKSQWRTLMAFADTVIPSVVQEKRGKTAFKEAALPSGQYAAALSSIEHHVLRDEHKSIAQAYLAERPSQLPEFRANVHRFIGLYTPKALAQLLAMGLDLLDYRVTSLFMTGYPSSFADQPVHIREKIILSWTGAKIPIYRQLFKQLTLLVKQNWVKSSPTLYTLLHFPYVPVHMKPGKTFEFEFIQVPPGSSAEIIETDVIIVGSGCGSAVSAKNIAEAGHRVLVVDKAYHWPAEHLPMKEADGWNHMFMGGGAMFSDDATTCVIAGGVWGGGGTINWSACLQTQGFVRREWASDNLPFFTSSEFQDSLDRVCDRMGASAANLKHNPGNDVLLEGARRLGWAAKAVPQNTGGAQHYCGYCTMGCGSCEKQGPVVSYLPDAAKAGAHFMEGFDVRRVLFAQKNGKKVATGVEGIWTSRDEHGGVAGTPLVQRRVIIKAKRVIVSAGTMQSPMVLLRSGLKNRWIGRNLRLHPVSFIGATYDEEVRPWEGGILTAVVNEYENQDQQGHGTKLEAVTMLPSGWLSFLSWTGGVDYKLLAPRMKNMVGHFAIQRDTGSGQVYPDPHDGRPRIVYAPTKKDRVHLMEGMLALAKINYIMGAREIFTTVPGTSIFTRPANQDTISAERDPAFQEWLGEVRKRGLPDPDTIFVSAHQMGTCRMASSAKKGVVDAKGKVFGVDEGLYVIDASVFPSASGVNPMVTNMALADWLSRNVARDLKMGTSLRASL
>c475
MADRERALAAICDTFVSGDASLPSASALGVPRVLRSEVEALGRPALVAELNQLLDTVESPVLNFALTGRPIRFSVLTQPERERYLKRWATSPIPLKRKAFQVMKRLTLLYTYGVDGSPYAAASGYVRGALDAPAPKSVTVRLPRAGETLDADVCVIGSGAGGGVVAAELSRAGKRVVVLERATPRFEDEFDGRELAGYAALFVDRGVATTTDRAIALLAGSALGGGTIVNWNTSLRIPAAVQEEWRAAGIDDLAPHYDAVAARIDVDTDESERNGANAALERGARALGLASATIARNVKGCGDCGPCTLGCRRGAKQSTLRTFLADASASGAEIIAPADVRSIDVSGGRVAGVTARVVGGDVRVRAPIVALAGGAIHSPAVLLRSRIATAQAGRNFHLHPVAITCGRYDDDLGGIWSGVPQSVLVDDFSDRGDGYGFRLEVPQGYP
>c476
MADRRGIGRNLQDHPLVGLGLHLRPEARMPGSMANAFLVYTRFSSGLDGCAPGDMKMSLSARFDQTPIGHQLGVLRVGPDQAHSTGFVELRSTDPSDEPFVAFNLLSDPRDMERMKQGVRFAIDLLHAPELAAVGQGAFAGAYTTWIRRLGQKNPLSKTVNAIGAKLLDLHPALRKAMIGLAVRGYDINRMAHDDAELERFIRDTVLGNWHACGTVAMGRPDDPAAGTDPAGRVIGVEGLRVADASVMPRIPCANINITTIMIGEKLSDAILGRAG
>c477
MADRSCWRTSCFYRHCSSLSLASSQQKSCGGRTRTCTNALEGSNSVKDQTEFDYIIVGGGSAGAVLARRLADDETVSVCLIEGGAAFEHDPKVLLLKESLALVGNPKYDYDYPLVEQERGNSLLRISRAKMLGGCSSHNDCWALRAPDEDMNRWSSLGATGWDAAGTAKYFDQVFPEMRVHPVTQNAELSKAWIEAANEEGFKTIDNTVGDYADGISWVSLNEEFGVRVSTAVAYLYPTSELPSNLTLQLETLAHRILVQDGRAVGIETDHGTFRASKEVIISAGAIDTPKLLMLSGIGPAEHLKEHGIEVVLDLPGVGSNLSDHIETPLTWESAKEPGESINGLDLGFYADVLGEGEFNIQVTIGHFSYWLHEPPFDDLPRPERAFTFAPNVARPASKGTVRLASANPKDKPLIDPRYFTDPEGRDEKLLVEGIRLGRKLAKTSALKDWIVREVSPGPDVQSDEELGAYARRYSNTVYHPSATCKMGAADDVEAVVDPRLRVRGIEGLRLADASIFPELVRVNPNMTVVMVGAKAADLIKEDNR
>c478
MADRYDDVIVGAGSSGAALAARLSEDPTRRVLLIEAGPDYTDDEVPAEVKLGTSPLMTGSHDWGYQADAGTAGRSIAYFRGKVTGGSSAINTAIALRGTPADFENWVGFGLPLWSWEDVLPFYIALEDDPEGEGPDHGKDGPIPIRRNTFGPLRPVQKAFAEACNELGFPTVDDLNSGDLDPRGSVGKLPMNVVDDVRMSTALTYLSTARSRANLTVLADRTVDRVLIENGTATGVVVRKGGVEERYDAGRVTLSAGAFGTPAILMRSGIGPRATLSALGIEVVADLAGVGENLMDHPTSALALAPKPGVCNAADPLVQMMLRYTSSGSSDVDDMQLYFLSNVDLGGGWSTEAGEMAGASLAPVLNPGLQKPRSRGRVTITSADPDAAPSIELRFLSEEEDRRKLIEGVRMSAKLAATTPIASLIDGLVGLTPEALESDAAVGEYLEATVTTILHASGTARMGRADDPKAVVDERFGVHGVANLRVVDASVMPEIVRANTNLTCIMLAERAATF
>c479
MADRYDYIIIGAGSAGCVLANRLTEDGTTKVLLLEAGGKDNSILVKMPAGVGNLIKEKGTFNWGFWTEEEPHLDNRRLWWPRGKGWGGSSSINGMIYIRGHARDYDQWRQMGLAGWGYSDVLPYFKKSESLEGGGDAWHGGDGPLHVSKASSPNPIYRAAIEAGAQAGHLTTKDFNGFQQEGWGPYQMTIKDGERWSSAKAYLYPALNRPNLTCVTGARTSRVLLEKGRAIGVEYIADGQAKTVYADGEVLLSAGAVQSPQILQLSGIGAGADLNPHGIKVQHELNGVGQNLQDHLDVCLSWECPQPITAYSMTRGAKQLLVGLNYMLFKKGKGREQMLESGAFLRSRPDLDRPDLQVHTVLAIMQDHGKIRVEKDGFTFHVCQLRPESRGKVGLRSADPNDDPTIFANYLATEEDRRAVREGVKIARDVASQAALDPYRTSEYAPGAAVRTDAEIDAWIRAKSETIYHPVGTCRMGVDGDAMAVVDGQLKVQGLEGLRVIDASVMPTLIGGNTNAPTMMIAEKIADVIRGRAALAPQDAPVFDGEAVKAA
>c480
MADRYTARRLPRDPGPSGWLEIIGEVPAYPQLEDGITADVVVIGAGFTGLSAARRLADNDPSLSVVVLEAGHVAAGPAGRNSGFMIDLPHDLGGDSYVSNIDHDRKQITLNRKAQDFARAMAAEYAMPEEAVDPCGRINGAADRSGQNHNLEYTTHLDKLGESYTILSADDMERITGTPFYTGGLYMPGTIMLQPALYITRLARGMTTTLANRVSLYERTPALEMQRNGSGWIVQTPKGSVTAGTVIMAVNGHAESFGFYKKRLMHVFTYASMTRELDQDSMNAIGGEPKWNITPSDPMGTTIRRINGVGGNRIVVRNRWSFDSSMEVTEGRVKRFARSHRESFRKRFPQLEGIDFPYQWAGRLCLSMNSVPAFGMVDTNLVSACCQNGLGTAKGTLAGMASADLVTGHRTDIVREMESGEDPKKLPPWPISSIGANSVIKFREFKARKEL
>c481
MADSCSSCSFQDTSYLSYCHSTNSSTNLFLTLVDFLVRTSCMVADPCNRASSGDRQKARVAQAFDYIVVGGGTAGCVIASRLSENPNVKVLLLETGPDEPSTSRVPGLLANIVAEALGYKGNDLSGSNPNGLNYVQGMVDQGIRASTARMYLGKKLNQTNLVVKLNAQVQKINFSGTKATGVTFKDLKTGEIVTVNVTKEVILSGGVIGSPQLLLLSGIGPKDQLEALNIPVVKDLKVGSVLLHHVSTAVHFTINDNYVENLNIDELVKYANNQTGQLAAINMIQLIEALNIPVVKDLKVGSVLLHHVSTAVHFTINDNSVENLNIDRTTKPDSWQPST
>c482
MADSDGETYDYVIVGAGSAGCVLANRLSADGSEVLLLEAGSPDEKQEIGIPAAFFELFKSDVDWAYETAPQPELNDRECYWPRGKTLGGSSSINAMIYARGQPADYDGWAAAGNDGWAYEDVLPYFKRAEHNERGPSEYHGTDGPRHVADLRSPNELSEAFIEAGQAVGLPHNEDFNAGEQSGVGYYQVTQKDGGRHSAADAYLKPVLDRPNLTATTGAQVTRVRFDGREAVGVEYVQDGTNSPESVDATEEVILSAGVINSPQLLLLSGIGPADHLTEHGISVVHELPGVGQNLQDHLHVKVNYACEEPISLEGADSLWNLVKYLLLNRGPLTSNVAEAGGFASVVDDNDRPDIQLHFGPSYSVNHGFDNPEGHGFWLGALCLRPESRGRITLRSADPLDEPRIDPGYLSEEADLEVLLEGLKLVREILGAEPFDDYRGQEVSPGADVDSEDELIEHIRETAHSLYHPVGTCKMGNGDMAVVDDRLAVHGVNGLRVVDASIMPTVTSGNTDAPTTMIAEKAADYILDA
>c483
MADSQFTFSNLINGELRPGASVTQGINPSDRKPLWDVPLASRQDLEDAVAAAKDAFPAWKKTAWGERIRIVSAIRDVLLENSEQMATLLTKEVGKPIEFARIEVDHSSNFLQFNAGLLEPEEKVTLDDETLRLSVRQQPVGVVVAICPWNFPLVLAVAKIAAALITGNCIILKPSPFTPYSVLKFAELTNHLLPKGVLQVLHGDANLGPWMCSHPGVDKITFTGSTATGKKIMVNAAETLKTITLELGGNSASIVCGDINPKIVAPQVAMGAFFNSGQYCLASKRIYVHESIYDEFLAEIVSTVKGWKVGPTSDLEEGILLGPVQNEMQYSIVHSFFSEAVDNGFKFALGGPIPKAEDVKNFIVPPAIIDNPPDESLVVKGEAFGPILPILKWSTEDEVLKRVNDTQTGLGGTVWSSNLVRARAIAERVESGTIWINSFEKPLPHAHLHGYKESGVGGEWGAEVFLGGENGNQVMASSQSASVVVRDGANFEFQVRDVPIPEIKPSEILVKLSATGVCGTDLGLAAGYLGPSCDILGHEGVGRAVAVGAAVDPAIAKVGDRIGVTWVRDACGRCFSCREPGGETRCLEQLNSGRKIDGTFAEYCVVPGRYALVLPEDPALPDELVAPVLCGGVTAYKALKICGATPGQWVVISGAAGGVGALGIQYAVAMGYRVAAIDVGTERKDYCLGLGAEIYLDALSKDVVQQLKDATDGAGAKAVIVSSGSGAAYQAGLAMLAMFGTLVCVGIPPPGQGLDLHPLVVIDNSITIIGSAVGTRTDVIEALEFVKRGRVTPLVNLVKLGDLDQVIRKLATPTVTAFDGRQRRSFGNGWLATPLVRLNIARYTDIRVLDPSTSVEMGPYHDFIIVGGGPAGCATAVGLANSARRPSVLLLEAGGPNDDQALRVDGQRWLNFKNEEANWNYQTTPQEHCNNRVIDYSRGKGLGGSSAINFGVFSVGPKDDYDEWARITKDDAYGWQAMQARFKRLESFHGKPPTGIDPKYVLHKAENHGTSGPLHVGYAGEWERDLTPLLDVFENAGYPLNTDHNSGNPLGASVVINSSHAGRRTMAQDMLKPGLENLDVLTGRPVQRLILEGTKAIGVETNGIK
>c484
MADSRVDYLVIGAGSAGCVLASRLVEGTGLRVALLEAGPDTGPEAMYSGIPLDAMSLWRSPVDWALSTTPQAGLDGAVIGCPRGKVLGGSSSINGLVHLRGHASSYDAWEKQGASGWNYRTMLPYLKRSERADGRDPEVRGLAGPMRVGELPAPNSLARAAYQAVLEAGYPETPDANGAAAEGVSWVEQNVVEDKRQSAADAYLGTVCSNPNLTVVTQAHVRQLVMAGSRCLGARYSKDGLSQDIYADREVILCAGAIGSPNVLMRSGIGPAAQLREHGVPVVIDLPGVGENLQDHPIAWVSYDAKRGAEETPLRPLQLLTRSHAHDDPDVLMMFAEAAIDPRWQGASPGLSVVFSVVRPMSRGPISLGWSWRYGRHAKSRMAPH
>c485
MADSVTADYVIVGGGLTGCLIASRLSQSPKKPKVVLLEAGSDPSGNTAATGFLTGLSLLGGEFDYHYQSEPVANTANRVHHFNLGKALGGGSLLNYGGWLRADSTDYDEWAEIVGDKRWSWEGFKPWFRKTEHFYDSNADADEHGFDGPMYVTSVSAAESGERKYPLREPVRQGWSELGVLPNLEKRHGTIAGLTEMWENARDSTRQPSNVVYPLDDVDVLTNTAVNKVTFTDGVANGVVLHDGRKIAARKEVIICAGAYGTPQILMRSGVGPSSILNEHGISIVHEAPSVGSNLHDHFAIYLAFRVRDPSLGYAMGNEAWQNPVLFKGLPWDWVVSGPLPAELAKKHNIEADRQGRNLYEVITLYVPPGIPGIPIGGTHIATSTMLLLPTSRGKVSIRSSNVADPPRIEPNYFDSPLDRDTLIHATRQTLQLLLATGSMGPIIESESPPSGEGLDGLEPLTADSSDGAIEERIRRTGMQHHHSGGTAAMGKVVDVEGRVMGVKRLRCADASILPIPLGGHPQATLYPMAEQLASMIIGDM
>c486
MADTDTQKADVVVVGSGVAGAIVAHQLAMAGKAVILLEAGPRMPRWEIVERFRNQPDKMDFMAPYPSSPWAPHPEYGPPNDYLILKGEHKFNSQYIRAVGGTTWHWAASAWRFIPNDFKMKSVYGVGRDWPIQYDDLEPYYQRAEEELGVWGPGPEEDLYSPRKQPYPMPPLPLSFNEQTIKTALNNYDPKFHVVTEPVARNSRPYDGRPTCCGNNNCMPICPIGAMYNGIVHVEKAERAGAKLIENAVVYKLETGPDKRIVAALYKDKTGAEHRVEGKYFVLAANGIETPKILLMSANRDFPNGVANSSDMVGRNLMDHPGTGVSFYASEKLWPGRGPQEMTSLIGFRDGPFRATEAAKKIHLSNLSRIDQETQKIFKAGKLMKPDELDAQIRDRSARYVQFDCFHEILPQPENRIVPSKTATDAIGIPRPEITYAIDDYVKRGAAHTREVYATAAKVLGGTDVVFNDEFAPNNHITGSTIMGADARDSVVDKDCRTFDHPNLFISSSATMPTVGTVNVTLTIAALALRMSDTLKKEV
>c487
MADTDTQKADVVVVGSGVAGAIVAHQLAMAGKAVILLEAGPRMPRWEIVERFRNQPDKMDFMAPYPSSPWAPHPEYGPPNDYLILKGEHKFNSQYIRAVGGTTWHWAASAWRFIPNDFKMKSVYGVGRDWPIQYDDLEPYYQRAEEELGVWGPGPEEDLYSPRKQPYPMPPLPLSFNEQTIKTALNNYDPKFHVVTEPVARNSRPYDGRPTCCGNNNCMPICPIGAMYNGIVHVEKAERAGAKLIENAVVYKLETGPDKRIVAALYKDKTGAEHRVEGKYFVLAANGIETPKILLMSANRDFPNGVANSSDMVGRNLMDHPGTGVSFYASEKLWPGRGPQEMTSLIGFRDGPFRATEAAKKIHLSNLSRIDQETQKIFKAGKLMKPDELDAQIRDRSARYVQFDCFHEILPQPENRIVPSKTATDAIGIPRPEITYAIDDYVKRGAAHTREVYATAAKVLGGTDVVFNDEFAPNNHITGSTIMGADARDSVVDKDCRTFDHPNLFISSSATMPTVGTVNVTLTIAALALRMSDTLKKEVX
>c488
MADTYDFVVVGAGTSGCLLAHHLSHAPSKPSVLVLEAGGQPSGDFLNAPAHRYHAALFRPDLDHGYVSEPERALGGRSIAYTRGKGLGGSSLLNFGVYLKGSAADYEAWAERVGDEAWRWETVRKDYAAMETYEFDGAAAYQHLSRPRPGVHGVSGKVKVGLPPVLEKGVLETMQALVGAGEKVNLDPNSGDPVGMSVFPYSYSKDGRSTTYASKEVILCAGAIDSPRLLLVNGIGPKSELESVGVAVKKDLPGVGKHLQDHVLAFMSVEVDGALNDRWAFESNEKRTSEAAALWEKDRTGAFALQQSCLWGGFLKHPELTSFPEFAALPAATQRFLAKDDVPTYEFINNCLAWPPGVQIEEGNSYMTCVAFLMNPQSEGSVTLRSSDPKEKPVIQLNFLSHAYDARIMREAVRSVWAKIAHNQVLKASIKRTLCGPASLSDADVDAFVRDNASTVWHANGSVMMGRPGEQGACVDKDYRVLGVEGLRVADLSVCPLSTNNHTQPTAYLIGYKAAQRLIQAYGLDAARQTKEGAILARIAELTVCTPNAECPNRLPLAPPSSAPLLLRLLDPSRPSSQILIQRTWLAQWQTLPTSPNPPSPKRGSQPQPNLSALLPCFVAPRPFSPRSPTSLLVLLHSREQHSLTLPAHSLCRSIEALHARYGSHSTLVDDDNNNDDDNNDDDNNDDNNNDDNHNNNDNDNKNKKNHINDNHNNHHDDDDNNNDNNNNKIDNNNNNNNNNNNNNNNNNNNNNNNNNNNNDDDNRHLATSMGFLRSLALVALTTSTAWAKPHPVHDEALMQLHNATQMDRRAACDGVSCGWDDWLCCPSGSSCITDASNQAQCGPAGAAATGGGWVYYTTTYVETVGAVTKTSVGSSYAGGSGGPTAAACGSSQSPCGSVCCDSGLYCKNSDSGTCAVIAGGSSGGILPTASASAPVRPTSSTLVVITYTGTPTATVPFQSPIPTGASGALTETEASSGLSAGAIAGIVIGVILGILLLLLLCLFCCARALFDTLLGVLGIGGKKRTHTHEETTYIEDHYSGGAAAAGGRWYGQGASRPSRPSRPMSEKKHGIGKGLGVAAALGGLALALGLKRKHDRKEDQSTVISGSSYYYSDYTSSTQARQTAKHGKQGIPADADLLSTRLR
>c489
MADYDFLIVGAGAGGSAVARTLAKTGKRVLILERGGRLPVEDENWSPDEIVTRGRYRTDEMWLDGKDRELNPHAYYNVGGNTKVYGSVLQRMRERDFEDLPLKEGLSPGWPITYDDIEPFYCLAERMYMIHAGADEDPTEPRRSEPYPFGPFEHEPYIQARADELQKLGFHPIHNPLSLNRDEEDPGARPCIRCQTCDPFPCKLHAKCDAETVGINPALVEGEGRVELWEHARVLRLLPAAGGKRCRGVWVRRAGHEPEEVTADQVVLSCGAINSAALMLASRCDAWPAGAGNGNDLVGRGLMKHNHSALLAIGYTPNTTVFQKTLAFHDYYFGSEEHDYPLGTVQLTGKAPWQRLKAFSNGPVPDEVLKYDAAHCINWWMTSEDLPVPENRVTVTDAGRLKVSFKSTNMSAHEDFLALWQKQLRRCGYDRFWLKTMGLDTVWHQAGTCPMGDDPATSVLDSDCRSHGVENLLVVDSAFMPSMGATNLTLTIVANALRVAAKLAGQPLELPRRQPADATLKLMELSVAGERVAAV
>c490
MADYDYIVIGAGSAGCALAGRLAAGTSSVLLLEAGGSDRRLTVRAPLAFAAQMGGPTDWDFSSVPEPACDGRTIPQPRGRVLGGTSSMNAMVWVRGTQLDYDGWQLPGWGWSDVEPVFRRIESHYLGGPAHGTSGPIRVTRLAEPDVTSTRWVTAARAAGVSDNEDLGGPDLDGTSIAPVTVWKGQRWNTARAYLPAARRRSNFTSVTGALVHRVVIRDGRAVGVEYERKGQRVIAGANREVILSAGAYGTPQLLQLSGVGAADHLRAVGITPVVESPRVGTNLTDHPATAMSWDVQPGFIGLSDAQKPQWLLRWVFRRTGKLTSNAMEALAHIRSDQELPAPDFQLIHSPSYVNLAAMERELRRASSVLQSYWTPKSRGSVLAQSADPHDAPEIRLNTLAHPDDVRAFIRVVRRTREIVATEPFGSVVTTELHPGPDVVTDAAIEAWVRSSVATTGHPACSAAMGANPDSVLDEKLKVRGVQGLRVADASVFPCIPRANTNAPAIMVGERCADFIHRDRQHGC
>c491
MADYDYIVIGAGSAGCVLANRLSADPSIRVLLLEAGGPDNHPLMAMPLAFLKVMKERAYNWNYESEPEPFADDRRVMLPRGKTLGGTSSINGMVYSRGHPDDYNEWADLGLSGWDFESVLPYFLRSERNWRGEGAHHGGDGPLAVSKMRSDDEIFPRVMSTARALGYDVLDDHHGDIAEGFAPAEFTVDKGRRASTSAAFLRPVLSRPNLTVKTRALTRRILIEKCEAVAVEYEHGGKVETARAEAEIILCAGSFNSPQLLLLSGVGPADELHEAGVAPVHDLPGVGRNLQEHPITSVGYSLTRPVGFESRLRFDRLALTTAQWMFSRSGDAVQLPITGMGFMRTKNGLNRPDIKANFYPTGIDSRIWMPPFRKGIGHVMSAMAVMLHPESRGWVKLRSADPKAPPRIRLNLLEAPEDRAVLRRAVRRLREFFRTPPISELIGEELWPGPGIETDEALDALHRRTVVTAHHSAGACAMGVGPDAVTDARLRVRGIAKLRVADASVMPRVVGGNTNAPVIMIAEKAAQLILDDRNGVQNAPERYSQYNRKDAIRELS
>c492
MADYGMHSAKCLASFHFTRDHVEAVVAKSALIIGSGPVGSTFARLLVGAGIDVTMIDAGGERSSEVGRHLRNETIYQHNPDRFTDVIRSSAMRISVPSSRRSESDSHINPDQDPATNLGASRAARAVGGMGIFWAGATPRTHPVVEHIPFVDGDELSRLYGVAEKLLHTTTSAYEMSVQGRVVTERLNEAGYQVRQLPLAVERLSVDPPRVHWSGPEIILKGGDRNAPSVADDPRFTLLPEHLCTALVHSGRQVTGAVVRDLATGAERTLVADTFVVACGSVLTPQLLWASGIRPDALGRYLCEQTMATCQVALSDDLASRLDDGPNVVEPNLWIPVAEGRPWHAQLHRGIFGYAAVPDGVDRRTVTDLVWFSTCDVRRENAVTFSDRVADPYGLPQPTFHFGANVADRARADDMVTDMAKAATALGKFLPGAEPAFLEAGFALHITGTTRMGADARESVVDPYAKVWGLDNLYLGGGGVIPAGVACNTTLTSMALAVRTAEAIAAG
>c493
MADYVIIGGGSSGGVIASRLSEDPDVTVCLLEAGGPGTSPLVSTPGAFGALIQDYRINTLNWRFNTDPSKALNDRRLYNPRGKMLGGSSGMNGMVYIRGDRSDFDHWAELGNDGWGYNDVLSYFRKAENNERGEDEFHGSSGPLHVSNGKREFDVYDAFIEAATGLDHQANPDFNGASQEGVGIYQFTVKDGKRASVKACYLDPVMGRRGNLRVEVHARVHRIRFEGNRAVAVEYSQDGQLKTIPCEKEVIVSGGAYNSPQLLMLSGIGPRDELEKHGIEVIHDIPGVGQNLHDHPDLMLIYQSKKRLGIALNVVGALKTVRDLFQYLTQRKSWLASPPTAAGGFLRSAPGQNRADCQVHVVPLAYRDHARDYKLMTKWGYAIILNIGRPKSRGWVALHDSNPESDPKMDLNLLSHPDDLKTLRNAFRVVQEILHSDRMKAMMKRPLYPDRYLETDEEIDAYIRAEANHAYHPVGTCKMGTDEMAVVDNRLRVHGLANIRVADASIMPSIVNGNTNATCIMIGEKAADMIRHDNMSSKNSIAEY
>c494
MAEALTEVKQLPARVSIITHDQPFDLVMIGAGMGGSIAAARCAAAGARVLVLEAGHGPVAALRPRGLMARLRAAPVDDGERWPTQLIMRRREGARAVEVNAVLGMGPGGSGRIYGAALGRARRWDFETDNQPHQWDAGGETALPNAWPVAYDDFLTAYREAERLLAPVGTRDPTDPDDDADLAPPPPLSPAHEAIVARLQANGRHPFRMHVGIAYRPGCSECQGSTCLRDCKAHGFNRALAPALAAGAPVTLQRGAMVRRLRRLPEGWAVDYVAASGEETSVTARAVVLAGGALNSPRVLQASGELWGGAVPDLIGRGLMFHASEIFAVAAPEGHSLHGPRKVIAMRDHYASGAMPLAECQSLGMVGKAGMITSFLNDKLRQIGIDAGVAGRVLLRPVGAVAERIFARSELFTAALQDLPYADNRVTTEVDAEGVERIAVTYRPRGELIARARHFRGLMREAFSPLNVRFLTAPGEPNLGHPMGTCRMGHDPESSVVDGFGEVWGQPGLFVADASVFPSSLGINPALTVAAHAIRVSARVGERLAL
>c495
MAEANSMYDYIVIGGGSAGSIVASKLAASDSNAQILLIEAGKLLLNPKMYNPSDWFEVLQQHPEIDWGYETVPQKNLNNRVIMLPQAKALGGCALHNATVYVRGGRSDFDAWGKVAPGWSWNDVLPHFESVEQIIKVLVATTDHFNFINDLFAAAKEYGLPENPNYNTSESQYGYAPFQFNNIKTLSKLFRETTFNTFLPAVHANVTVIAEALVTKIRFNDTKAIGVEYVQKNEKYFAAVRHEVVLSAGAIASPKILMLSGIGDETELAKFDIPVVANVPEVGKNLHDDLFVSAGFYIPEDKDLPVYSYSLAPAVIFGSTENSSSVVDIECSVGVGTLKGFPGPKNSFWLWPNVMHLKSKGTITLRSSSPDQTPVVDPKYLTVPGDLQSCIKALQLGIDIGNQSSLGQWREKQIAPEPGTDLESYIRETASTTQHYCGTCRMGIDQSSVVDTELKVRGVSGLRVIDASVFPLPITANTAAATMMIADKGAEILT
>c496
MAEAPPQRVHPRARPLRDAAHGGAGRSPAAPAGDRHAGQRGPAHVLDRLPALGLRHAAGRDPLRVRPRAAAEDPLGERARLLRAARARAGRGRLSRLYDVAVVGAGTAGAIVAARLSEDPGRHVVVIEAGPDYPRLEDLPPELRFGQAEGDVIPATHLWDLEGRFTRAQELRPVARGKVVGGSGAVNGQVFLRLRRPLARARRPDAGAALCTRAVAARPGGVPRGRPRPRLPGVRGRQRA
>c497
MAECECRFEDTSYLNGTCGNSPNVTMLLSLVDLLIRSNCHIAQPCKRSRSFEFEKSPVFDFIVVGGGVAGTSIEEPVSITSTLPKNFPIAHVLLHNFPGPVVASRLSDNKKWRVALMEAGPEEPSTTMVPAFSWTAIGTSLDWKMTTEPTSDACLSTGGVCSWPRGKMLGGTGSMSGSMYNRGNKEIFNNWAREGNIGWTYYETLPFFKKSERNLDKDGIEKLYHGTKGPMPVSRFPWKAPMVSEFLEAGKEIGYDVRDLNGANQTGISIASMMFEDGVRVSAPRAYLRGNSQGRKKNLYIMTESTVTRVIINEKSKRAIGVEYYTRNGVKKIAYAKKEVILTAGTVNTPKLLMLSGVGRREVLVKHNIPVISDLKVGENLHNHVGIGIPFSVKHEGVADLLTVESLTEYLENRTGPLASTGLTQLTAFMHTKYSSDMPDIQMFFDGYSAKCPVESGGQMKMMPDGSARRIIYLRPTNILPKSKGYLTLKSSDPFDPPLIYPNYLSDIRDVQVLIEGIRLAQKLTRTEAVKKWDIQMEKIDYPACDKAGAYDSDQYWECMIRHVTGAENHPAGSARMGILPEIGSVVDPELRVYGVPNLRVMDASVFPYLPNGNPIPAIIMVAEKGSHLVEKSYSLC
>c498
MAEELKSDVCVIGAGPAGAVVASGLAARGVDVIVVEQGERVGAEARSRLVETRLEAMLAGSTLFTRDFDTGTAARDKAGATTSSGPLSYGYSHVVAVGGSSLHWNAHCPRPVADDLRVRSEFGYGRDWPFDYRELEPWLVAAERELGVSGNDDNPYASPRSAPFPMPAHPYSYFEREQLAPAFTAAGCTPHSRPHAINSVARDGRPACLACRMCTACPSGARYAADLVHLARLEQQRPDAIHAGLKLRALELAAQRGRGDGRIGVAHAVRVADGTPVAIRARRYVLAMGGVETPRMLLLSDIGTAGGHVGRGFTDHPFVGFSYSLRRRLSGRSLGFPAMYTEHFRSARARAAHNTFHVSVMPSPVEDDFEPVDKLVEWSIENDRLSLSKLRRKLRQTLIGWTIHEANDQGQLALDPEVSDDFGDPVAKITMAHSDRDREGVAALERWLPRLGDALDADELFLGGTGESPWFSSHPAGGTAMGVSADTGVCDPDAKVFGVDNLYLASSSLFPHQGANNPTLTTVALALRLVEHLGGAGSR
>c499
MAEFDLVVVGAGSSGSIIASKVANETGLKVLILEAGGSDFRPDIKTPIGYGLTFYNKNVNWRYQTKEQNNLDNRSVYCPRGKVVGGSASINAMVYVRGQQGDYNHWETCSSAEFGWNSVQSTFDLLEGRGDNTKGSHICVSNVEDQHEEVLEHFFSAARDLGIRYTEDMNSNANEGVGHYPITTKNGFRWTSADAFLKPAIKEKNVKIIKNAHVSKLIFDDNRVTGLEFIKNGLKKSITARFGVVLTAGAINTPQLLMLSGVGPSKHLLDKGITPIADIKGIGQNLQDHLGIDYLFEANAKSLNRTLSSWSGRFRSLVNYIASKKGPFALSVNQGGGFVNWKSRNEWPNLQIYFNPLTYSIKRPGKRMLLRPDKLDGFAIGFQPCRPKSRGEVYLNSSNPMDSPIIDPKFLSSEKDIYDVEAGINFVEEVTKSENLKSIIVKAKSIDLEKATIEQKKEDFKKRAVSVYHPCGTCRLGNDVERDPVSIDFRLRGFQNIWIADASLFPSIPSGNINSAVMMLAYKASKSISQQVNKKLASISKEKNISD
>c500
MAEFDYIIVGAGSAGCVLANRLSADPRNRVLLIEDGGDNQHPFIKMAGGFIKIMGNPAYFRAYPLEQRPGMRPGIHTYGRGLGGSSAINGTWYLTGLPGDYDGWAKAGLTGWGWDEISRCFGIVESYRDPAAQPGRGQHGELQITPSTYQSPLFDALAAGFETAGMPWKGDVTTPGGPVAGRSQYTVDRKGVRESTYKAFVIPVLGRRNLTVVQHTAVKRVRIEQGRATGVVTEAHGQECAHLAAREVILCAGVYGSPQVLQLSGVGPGAALQALGIPVVKELAAVGQNLADHQKFGVSFDLTNHPGTNREFFGWRLYRNALQYFLTGKGHLARVGMPLTGLIASEGTDPAWPDFQVAAAPFAMRTINEMAARPGSPLTPNPGLTFSGYHLRPRSRGSIRLTAPDYRTSPTIDAAIWADPYDQAKALELFKLFRRIAGTGPLKPFIGAERMPGPAVQDDAAIVSELAKMVEAGLHGTGTCSMGTDPATSVTDARCRVHGIDGLRVVDCSILPTPVSGNTNGPVIAVAQRASELILADVKV
>c501
MAEFDYIIVGAGSAGCVLANRLTEDGKSTVLLLEAGGKDTSMMIHIPVGYAQTLKDPKVNWMYETEPDPGTNDRVHTWPRGKVLGGSSSINGLLYIRGQRQDYDGWRQMGLRGWSYDDLHPYFLRSQNQERSGMDGHAKGGPLNVSDVTEPHPVSDAVIEAGKAMGLPHRDVNGEDQEGVCYYQLTVKNGRFATRAIHHGYDPLSADGALTPPLHLTSTFAFETAEQGGARFAGEAPGHIYSRISNPTTDLLEQRMASLEGAEAAVAMASGMGAITSVLWSFLQAGDELITDKTLYGCTFSFFQHGLSRFGAVAEMLSAHSQVAAVFYPGLESFPQHELAKRQMHGFGGMIAFELTGGYAAGIDMMNRLQLIRRAVSLGDAETLIQHPASMTHSTYSREEREAHGISEGLVRISVGLEDVSDVMADLHQALGSNQVVAA
>c502
MAEFHTFRGIVMPGVIEEINEKHFDAIVIGSGFGGAVAITELAEKGKKILVLERGTWWGNPEGPAVPNTFMKKNLDLRGKKQWWPRPNDSKGLVYFLRSIYKRFSPLKGLVHGDKDVGLWKNRDGLYRVTRFSDTNGNVDVISGIGVGGGSLIYSGVNLIPHRHVLDRIGLGHLRDEEFQRAGRWMHKYRGKINKVVTKAPAAHRPGDKFQLTAVPSVEDGGPPAAAPDYEMSDPELKDYEEDFLLLDRSRVLKRAHREVERMGGFGPGSEAGEWKPLPLSVVEFDPEQGSDADKKNAFCLREGRCSAGCLPSARHTLYKTIQNLIKDGADIDVLPQTQVDRIDFKADPNNYSVTFETYLEDKRGETGSASAGAVFVAAGCLGTNEIMLRSQRAYDEQDQTGLPLSSMTGKGFSTNGDFFAFAENVGKKDNPAAVPNENRPGKVNPTMGPMASSGFHLIFGKGTVDRIDLHIEDTGIPPMFAQAINTFAPGLGDSRMLKELAKMVLTVKSNREPFQTKEKPITTSKNEQKSYLTERELVSDMFLFTALGSGPGEPLGSFSIDKDDTMQLTYDEKHKLEDWEVFKKIGDVLEKLSEKMNGDYLGSPFWNRERRIATVHPLGGCSVGPDRDHAVADKFGRAFDGRPNAGATDTLPGLYVVDASAIPGALSVNPSFTIVTQAITTVENAVKELG
>c503
MAEHADVVVIGAGSAGGAVAARLSEDPSRTVLLLEAGEDFPDEETAPPSFVTGGNVIGGWFAGVGAAIPAHDWQYHGEPLAGGRRIRLDRGRLVGGSSMINGCIAVRGKPSDFADWEAAGATGWGWDVVQPIFARVEDELSVKRYERPRWQPFQAAFVDAFVELGFREVADMNAPDAWDDATGAWPQNRRNEIRQGSLVTYVRQARRRANVQVRGHAHVDRVLVRGGRATGVRYLDPHGRAHEVEAGRVVVCAGAYGTPAILLRSGVGPAEHLGDLGIDVVADLPVGDGLRDHPQTMFELATPPAVAEMAGPGLAVVARGVGWWAFPVALDERDGVCAVAMALTSQEPQGTVRLASTDPLEAPVIVHNSQQVIDRGAFDEAYETFRALVGTRTFSGLGIGGRDAGRDPAEVLRERLATARHPACSCAIGRVVDERLGVLGVEGLHVADASVFPTNITNNTNLTCFVVGERAAQLVDADDRRSA
>c504
MAEHPEPGHQYQKSGIVLMHSFDHGSIHIDSKDPTASPDIDLNILTNETDINILVKAYRILQAIHSQEPLKSIIDCKALPGKSSDTDEALIEYIKKSVFMAFHPLGTTSMLPFEDGGCVDNQLKVYGTEHLCVVSSIVS
>c505
MAEKFDVIVVGAGPAGTACAYTLAKAGVDVLLIERGEYPGSKNVMGGVLYRKMMDDIIPGFYKEAPVERPIVEQRFMMLDAESAVTFSYKGMEWAQEPYNNFTVLRAKFDQWFADQAVKQGALLINETVVTECIVENGKVIGVRTDRPDGDVYADVVVLADGVNSLLAKSLGFHKEFRPDEVALAVMEVLKLDKKIIEDRFNLEGDQGCTIEIFGDSTKGILGTAWLYTNKDSLNIGVGAMLSGLIKAKIKPYELLEYVKQHPMIRPYIQGTEQQEYLAHLIPEGGYNSMPRIVGDGVVVVGDAAQMVNAIHREGSNMAMTSGVMAAEAIVRAKEAGDFSRTMLDSYRVNLMNSFVGEDLKKYKDATHHFEKYPHYFEKYIPLMNKAASQMFTVDGTPKREKQKKIWKDIGGAGDKFKIARDLLAAWKVMK
>c506
MAEKITGSHGIIDGVEGHFLNRIGSAIHSIRVNAKLVIISAGSIGSTQVLMKNSIAKDKTGKGLAMHPAPFILGDFPFEIRANQGIPISYTLHEFGVTNGVEDGGFLIQAVYLPPLQFSMALPATGRQGQDLMSRYNYFTMAGVETRDESNGVITLSDFGIPRMSYSFGEKELDIMSRGASIISKMWFRLGAKRVITSHMVKRELKSESEIPELINAIKKDPKNLLVGSAHPQGGNRMGSDPDRCVVDSNCKVYGFRNLFVCDASVFPTAVGVNPQMNIMALASIISDRINKNWDDFVSE
>c507
MAEKIYDAIVVGTGPGGASVALQLAKAKKKVCILERGPRVEKPGTVLGMLGAVDLMGLMPGLISPMIVRGIALGGSTLLYCGTAVYPPKWLKEKYGIALEEYADDTIEELDLKPLPENMLGESARLIMKSANDLGYQWEPFRKFFKPERAKKECTGGSCMMGCSCGMKWTAGEYVDQAVSLGAELFLKTRVDRIIRDNGTCIGVIAKTPEGEKQFKAKLTIISAGGVGTPGILLRSGIEDAGKKFFTDPVVMVYGIAKGNIKGTLYDPPMSVGSLAHYDERIVFANLTDPWLMFPAMMALGRPTRFWQAFQLGRALGIMVKVGDDMNGQIYKSERFHKPMQKTELDRLKKGTEISIKILTKAGADPNSIAVTPIRLTHPGGTARIGEVVNENLETGIKNLFCCDASVIPETLDLPVVLTAISFGKRLANYLLKNNRI
>c508
MAEKLIFDYIIIGGGTAGGVLAKKLTDSYTNSVLVLEAGQNRSSELSSASIADASLNSSNNRYSFQILTNSEEQLNRSLLLSGGRVIGGSSETNSMFAVRGSQGLFDRWEAITGAPWGYREVYQLFMENETYDGLSQTPELRGYDGPIKIRQQNIPDKSINQILAQAVSTVYEVPVVEDYNTGIGGCAFTKTQFTQSWMNHEYLRSSTATGYLNATVVTQGDLVLPDEYGMYSRRLVIFTKTTVNRILFQVKFKIPTACGVEYIRNGITQRAYARKGVILSAGIFSSVILQRSGIGAREELEAAGVTTVVDNPNVGRNFMSHFDASMGIEINTDRLLSIMDADPDMPISLGAFAEDSEGSRRLQLIGIATSVFLPIQEVLTNHWRFDRDKSSNIMSLLLIDLNASSRGFMTINTSDPTAYPTVSLNPLTTADDLEFMVDQFIKVSKIFDLAKEIDPEGIYRIVYPPENIFTIADREEKRRILSSYIKASYSAAYHYGGQCRMAVDSTEGVTDGYLNVFGTANLKVADLSVSPILPDGNTAVPSQMIALNAARFLQSETAYVFSDNEFETEQCGY
>c509
MAEKPFDVAIVGAGQAGCTLAGKIAEKGVHPSTGEPLRIAVLDRGPNFKGKHNSGYGSPERRQMFTNLSQDFSGRYTRWTGMPPGARRKVPLQPGQEIFLQRGPAIFGGGTLPYIARTRAPFDIDMQVWEEETGADWGPGILKPYGQQVHRDFHIHVRPKATLCQLDHLVREAALSIGIRTRLSPPPRRPSVPESAAADGLRTLKSAS
>c510
MAEKTYDFCVVGVGACGGLLVKELSERGYSVIGLDAGPRYNPKTDIVNDEAEMLKLFWNEPRVFAGKDPVHVMSGFGVGGGTLVWCGVSPRFHESDFRTKTLDGVGEDWPITYKDLAPYYDRVERDFGVSGRALENPLDVPRGPYPMPAIEWSWACQVMAKGVERVGARPLHGPLAITSEPYRGREACVKCGFCISGCPSTAKGCTLTDFVPRAERHGAEIRAESFVYNITYDARKNRVTGVEYYDVNNKTHRVQARVVIVSAHPMETSRLLLLSRNQTFPDGLANSSGLVGKNFMVHWDFSVYGQFEQRLNAYKGPIMGNLMVQDWYETDPKRDFARGYVLESFLPHPFYFGVAGPVFWGPPLKEMIKAYDHTAGWWVTGESLPNDNNTITLDPDVKDHRGLPVVRSTHEWSDNDKRMMKHAAQNAVATLEAAGARKTYVGVTMSAHPMGTARMGSNPRKSVVNS
>c511
MAELEALNIAFDFIIVGGGTAGNVVANRLSENPNHSVLVLEAGGSYVRFLLPSLTPHYLPTNKHTNSNENSINLEAPLLAVLATPNTPTDWNYTTTPQPGLGGRSIAYPRGFVLGGSSSVSASPGSFAPLETLLYSQVNEDYLVYTRGSSSDFNRFTSLVNDPGWSWDALAPYRRRNENFTAPVDGHNTTGQFDPGVSATSYLAPKFIARPNLQVLLNARVTRVLQTSNKDFRTVVFRDATGTHIFSEPTTYSLPSSLLGSTFTLTAKKELILSAGAVNTPSILLHSGIGNSTTLTSLGITPLVNLPSVGQNLTDHSLMTLAWGVNTINGTFDAIFQNSPPGTLDGAVDEWNSTSPHRGQLVNDLISEIGWLRLPPNSSIFFMNSNTDPAAGPNSPHYELLFSNGFIGNPPAPGTYLGMHVAVVSPTSRGSITLNSTNLDPLAPPLINPNLLGTPVDCAIMRFAVRSAVTFISHASTITP
>c512
MAEMAGGGEGDGMLMGGAGSANTTDACYSDPSNPDCAAFERSDDDWAADIELLCSAMPFMPGCTLAEQCMNGTAAGEYCEMSSLAGNICLDMPGMKGCEAWNALCGAASAVEQCSSPGPVVALPTTALAKEGLESLCSTHCMDGCPDCEMGKLWNTCTDPLSVLAWMCYAMPDMPECLAAPQGSGMVVACGDAEVAATFPLVCAQPPTPAANFQHRLRTCRTAGVAASASGSPAVTMAGLSTVLAVLALLPSPVAMAMTPMPTPALAPGPAIDDIGGNCPLLGRGNMEAPCYSDPSAAACVSFERSDAGWADDLSQLCSAMPYAVGCWLWHLCKTGAASGTYCALPSLTANVCVDAPLVNATSAPGCEAWAALCGAQGSVVAQCSAPGPLPDIINTLTTRDGINSLCGMHYMDGCNECTPHEGPAVHDFAACADPGPLPTLAHQCYAMPEMGECTQTGITAMCSGAEARATFPTVCVDPPNPTTLAPAPAVSACDVAAGAGAPPAASARPASHSRASLVASRSGFCAPSPALRSQRTSTVAPARRAASAPRASAVDDIQRALSTAGSPVSGKQYDYILVGGGTAACVLANRLTADGSKRVLVLEAGADNVSRDVKVPAAITRLFRSPLDWNLFSELQEQLAARQIYMARGRLLGGSSATNATLYHRGAAADYDAWGVPGWGAADVLPWFVKAETNAEFAAGKYHGAGGNMRVENPRYSNPQLHGAFFAAAQQMGLPQNTDFNNWDQDHAGFGTFQVMQEKGTRADMYRQYLKPALGRPNLQVLTGASVTKVHIDKAGGKPRALGVEFSLDGPAGERMAAELAPGGEVLMCAGAVHSPHILQLSGVGSAATLADHGIAAVADLPGVGANMQDQPACLTAAPLKDKYDGISLTDHIYNSKGQIRKRAIASYLLQGKGGLTSTGCDRGAFVRTAGQALPDLQVRFVPGMALDADGVSTYVRFAKFQSQGLKWPSGITVQLIACRPHSKGSVGLKNADPFTPPKLRPGYLTDKAGADLATLRSGVHWARDLASSGPLSEFLEGELFPGSQVVSDDDIDSYIRRTIHSSNAIVGTCRMGAAGEAGVVVDNQLRVQGVDGLRVVDASVMPRIPGGQVGAPVVMLAERAAAMLTGQAALAGASAAAPPTPVAA
>c513
MAEMESADFVIIGGGSAGCVLANRLSADPATGVVLLEAGPADDWRAWSVHMPAAYGINFQGGPYTRSFHTEPEAQLFGRKVYQPRGKILGGSSGINGMCYTRCSPLDYQRWVTEGAQGWSYAEVLPYFKKLESSDSGDDLYRGRSGPVRVKAGPWAFASYDAFQKAGEQAGYPLTPDINGYQQEGFGRFERNVDHGIRASASWAYLRPVRHRKNLRVKTGATVVRILFEGTKAVGVEYRQGVQVRKIRAEREVLLCAGAINSPQILQVSGIGEPAHLKELGVATVAALRGVGQNLQDHYEFYLSWICPDEMSLNRHLGPLGKAKIGLEWILTRKGFGESNHCEGVAFVKSEDSLGYPDVQFQFMPLQLADGLSPKSKPGGFCITIAHQRPKNRGHVKARSLDVDKAPEIVLNYLSTDYDLAKARRCIEIVRDVIARPAFDSIRGKEMKPGAEINSRQSIEQFCRETGTSGYHASGTCRMGSADNPDAVVSATGKVFGVENLRVVDGSIIPSLTTGNTNAPIMMMAEKLADDILGVPPLIPIHAPFAGELKPDM
>c514
MAENGTADTPVSSIDEFTQTLFDFIVVGGGTAGLVIAARLSEDPNVTVGVIEAGKYKMNDPLIDTPTAFVQTFENPEYEWCMYTTPQASNRGRTHHVPRGKVLGGSSAINYMMYVRGSLQDYDDWAALAGDEGWSAKSMQQYMRKHQTLEPIDPAARETAAPCIAEFHGTSGPIHTTFNSAQLPIERDFVKALAQAAGLPNKPLDAWSGDHLGFYHTLGTVTRTGPNKGKRSYAGRDYYQANSSRPNLKLLCEANVNKVILDGTRATGVTLTFQGQEYTASAKREVIVSGGTIKTPQVLELSGIGDPEVLAAAGIDVKVENRAVGANVQDHVVTVVGFHALPGVMTADTLYQVPEAMQAVLKEYLETGDGPLSAVGNTQGFFPAKKILAEAELSEIVQSILDTKPVSEFHAKQLEQIIAHLESDISANLQLVLMTGTVNPDEGVEHQSRMSAPPPPGQPGGVSLALCIQYPVARGSIHVQNNDPTAPPLINPNYIGHEADVTLLAAFARWADQVGKSDAVKNSVADRYYPKASIDLQNLEEAKEAVRDAVAGEYHICGSVALGDALDSRLRVKGVEGLRVADASIFPNNISGNIVGTVYAVGERAADIIKEDYGLA
>c515
MAENTHDLKNATSDQDKITRREFAKQTVAGTAMLAAASAGALQLVAQSPAGPNLNKQVVEALGSVFIPSRPGDPGYKDLESHGITDYVLEGLPVGGDVGGDPRREIGEESSSIEHEALEAFNSTAKEFFGGKTFLDLDEKQREEYLGLIVDGKKIADAQLRIRLQAFYRGARARILSVYYSNYPEHEIKRDAKGKPILKPGDPHQISNPNTTKIVTGWDICGFSGPLTWEEEERRRAIAKKTSNYWFEGYHVKLDNPLPPARPTKTSDGKDYYDVVVVGGGLGGCIIAGRLAERGINPKTGDRLRVAMIEGGPDWTIQDPGLRPGYGSPIRRSMITNIHDGIGPEGHVMGPDYRYPDRVRGGPAAYNFRLVGGCSMHWGAVVWIPDEDNFRFWRDASGVDWHLGEFADAIQEARDVFPIMSTPDSWWKKSDDLWADACKANGFEIYRNYTAARNPLGTMYDGMHHQFLSRYDIKGTGLPWAYIGLQNGLKVIANAEVEKVLIEKSPGARPVATGVVYKDQSGAMHELRAARVIVACGANWVPLVLYKSGYGPREFLGDRLLVENKNVGAHLTGDGGGGGGATCYYDDPIDENIAVRNAEPYAAVTPKPWSELAIFTGKGVPYQAFPYDAAVGRDAPQYGWEHKEYMRNYSGLKRSMSISAGFGGIPYSWRVMPPDGRMERVSIDAPRIEAAIKQCEEVTRAMVEKLPIKPKRVEFRRSRRAVDIGMSHFSGTARAGESRENSVCNSDFDCHDIDHLMISSAAAIPRTFRWAGGPTAIVGCYGWRRMVANHFTRGCSTKGFA
>c516
MAENVIAFDFIIIGGGTSGLVVANRFLEDPTVNVLVLESGKNYLGNPRVNMPAGWPALLGTEADWNFVTTPQAAVERLGLLNNYSANIPSSGPIQASFPAAPENQFLKLWNETFKTLAMALMVTFLTALHLDYTQILLPLIQTLNNEGMQRMLNMSLSFT
>c517
MAEPGRIWPRLMASRTAEQGQRLYARGRGVGGSSAVNAMVALAGEPGDYDEWERDFGCAGWGWASVAPWFARLPIPLRPAMPHEMGVVAQAMLSAEPTAEPANLTRTADGRRASVNDVYLEPARARANLQVR
>c518
MAEQLVQQAFGNILPSSDFTLTQALLVSSFFLAVNFPNIAINPPVAESVNTEYDFIVVGAGSGGAVVASRLSENPDFSVLLLEAGGKASKISDIPFYGGVLQLSESDWNYTSEPNSEFCLGMKNRACPYARGRVLGGSSVLNHMFYARGTKEDFDEWAALGNYGWSFDDVLPYYKKSEDNRNYLLAKNAFTFPQMTMRDGFRCSTSKAFLVPAGERENLDVFTHAHVTKVLIDAASKRAYGVRYFRNGAYHDVFARKEVVLSAGVFNSPQLLMLSGIGPKEHLKEIGIPLIQDLRVGFNLQDHFGYFMPFLVDKPVAFVPERYNNHLTNMTYDIYQKGGRICLELMETKAFREVNGRHPYVPLPTCPNVLPLSEEYFDCFMRYNTQPFLHGSGTSKMGPANDPTAVVDPELRVHGISGLRVADTSIMPKIISGNTNAPAIMIGEKASDLIKKTWEKKEVKGSQEGY
>c519
MAEQRSADVIIVGAGIAGMTTAHRLAQAGVSVIVLDAGPRVDRAQALQTYRSALVKIPESPFPMAEHASYPTTTDVGADVYYVQDGADLFKSAYLRVVGGTTWHWLGMTIRLLPCDFTLFSQFGVGRDWPIGYDELEPWYIEAERELGVAGEGDLGSWRGAPYPMKPIPLSYSDLEIKAAIGALEHEVTINAQARNTTDYDGRPACCGASSCIPLCPIVARYDASVHVAKAEAAGVEIIENAVAYRIEVDTQGEVAAIHARRPDGAELVATGRLYVLAAHAIETPKLLLMSRTDALPEGVANHSDQVGRNLMDHPIQLSWAVVDRPLGQYRGPLSTAGIDGTRTLASRDTRAGFRVEFGNDGWTWPVGSPAQRVPELLARGLRGPALATALAARCSRELRLSSMAEQLPDPNNRVVPDFDRLDAFGLPRPRISYQVDSYTRSGMDDARAVHDQIFSALGGAEVQHGEAYAGAGHAMGTYRMGADPTSSVVDADLRAHQHPNLFMLGSGTFPTGGTANPTLTIVALALRASATIIEDLPNW
>c520
MAERFDPQGDEERVDADGSGAPDEYQKGEFLNALSLAAYTGRIDRRTFLGTLLKAGVASATAVAWADHAAQAAENQAQRRADLKAGYDYVIVGAGTAGCVLANRLSADRSVSVLLIEAGPGGLNRPQITDPFVWFTNLGSELDWSRPTVPQDRLDDRVLVLPSGRLVGGSSSINALMWLR
>c521
MAESAGKYDYIIVGAGTAGCVLANRLTQDPNTSVLLLEAGAKDDYGWVHIPVGFLRTADNPRTDWQYRTEADPGLNGRSLLYPSGKILGGSSSMNGMIYQRGQAQDYDHWAELTGDDSWRWDQVLPLFKKSEDYAEGANDFRGVRGDWRVEKQTLRWDILDAFRDAAAQSGIPKIDDFNRGAGVEGCGYFDINQKNGLRLNTAKAFLRTIMRRGNLDIMTGSHVKRLIIQQTAQGNVCTGVEFVGGDREWTADVSRETILAAGTFGSPQILQRSGVGPLASLQKHAIAPIQDLPGVGENLQDHLPLKMVFKMSGAKSLNTMAKGLLGKAALGLQYILKKNGPLTTVPAPLGAMLRSDSTQSSPDLYYQIQPWSQDSAGAPLHDFPAFTVSVSNLKATSRGRVQIASGDVMMPPTITCNYLSTPEDQEMAKTAIQLTRKIAAAPALQSYALEEMQANDDLLRQAGAIAFAGENPVGTCKMGRADDPWSVVDSQFRVLGIAGLRVADASVMPIIPAGDTSATTIMLAEKAARLIRAYR
>c522
MAESEADIIVVGGGTAGLITAGRLAQAKPDLSILVIEAGANYRGNQMVVNPAIYLSHIAPTSTVAKFYKSKPSDYLAGREAIVSTANILGGGSSINFMVYARAQEVDFDDWNTEGWRGKDMIPFLQKIERFQDRDPEIDKSIHGYNGELSISAGGTYVQDSFQKVFFKACEEIGIKKVPDVQDFKTANAVGDHNAIFYSYSSKATAEETLDGLLTGRLTFEKAVEQKAANSCFGKSVTDIPEFNTGFLNHPVDTAIYNGPHSIGHPIFPPGSKADPEIVDAASKAQGYPAPIEYSEADNKVIEQFIRENLTTTWHSMGTYLSICPANVAANTYSTALAIGEKAASIIARELGISAYSTQKRFFPPGELKDASSKGKAGGLLAWQRDPRAIANLLTPVPVPSGAILQLISIVGKAGVEWRGDHQDAETHAQERKSTRSG
>c523
MAESGSGSGHDADVIVVGSGFGGSVSALRLAEKGYRVLVVEAGRRFSPQTLPRNNWHIRRFLWLPRLGCHGIQKITWLGRVIVLSGTAVGGGSVVYANTLYRPLDAFYTDPQWRGITDWRAELAPFFEQAERMLGVTANPTTTYADEVFHAVADEMGVGPSFAPARVGVFFGRDGRQEPGVRVPDPYFGGAGPSRTGCVECGECMTGCRRGAKNTLDRNYLFLAERAGAQVLPDTTVTAVRPRPAGGYEVDVVRTPGLPRRGRRTLTAGQVVFAAGTLGTQRLLLSARERGDLPALSPRLGELTRTNSESILGATRFRPDRRVARGVAITSSFYPNGQTHVEPVRYGRGSNLMALISAAMTDGGGRTPRWLKYLRGLLVRPHHALAMGLPWRWSERTMIALVMQSRDNSLTVSLRRGPLGLRWLTSRQGHGDPNPSWIPEGNDAVRRIAARMGGYPGGSVSEIADIPMTAHILGGAPIGADPSTGVIDPYQRIFGYEGLHVVDGAAISANLGANPSLTITAQAERAMSFWPNEGEPDPRPPLGQPYRRVDPRPPVRPAVPANAPGAYRIGAPVTAPHR
>c524
MAESIADVIVVGVGGLGGILAKELSSAGLKVVGFERGPAPQKEDYAPRDSIRFLVRPEKLDWVRHEPTTTRRRTGEKATLQYRTSPLNVLGGALLHWTGQSSRYMPDDFKLYTHEIASGNAERARADLSGYDIIDWPIGYADLEPYYEKFEWEFGVSGQAGTNPFAGPRKRGFPLPPLRHSARMKLFAEACQKLGYHPYDTAAGIASAPYKPAAPFDDRIPERPACVYCGHCNFYGCHVHAKSASLYITIPVALGTGNFELKTNAKVFRLNIESGDRLSGVSYFDPAGTVHEQKARVVILSAFVFEHARLLLISKTGKGRFARGVANSSGYVGRNIMAHGDVRAMGVFDDYIINGFIGPGSAAIRIDDFNGNNFDHAGLGFIRGGTIGTSGEGTPVTRFDVLPPGVPTWGKEFKEFYTRYYTRTMDLNMQPETLPHSANRVDLDARQRDRWGLPLPRVTFEFHQNEQRLQKFMAGVGEKIMRATGASRVWSEEKGRPNRWAGGTRMGADPRTSVVNDQCQAHDIDNLFIVGSSVFPTMAGYPPTATVAALSYRLADFILAQKNWFK
>c525
MAESLSRALVRRERPILRNSEPFLRIDSQQPQRESTRVQWTRSEDDAWNLNANWSVGEAEMKSRHSTLDAILEAAEEMDLGAELEPLEDLNQVRDTYHLMGGTVMGSSAADSVVDANCLVHNTQNVFVAGASVFPSGGVANPTFTALALTHRISEILP
>c526
MAETDVIIIGAGVVGAVLATELAKRCSVTVLEAGPDERNFSTPIDNYIKGKTPWPEAPPVQGPSKDYLELSGNYPFKTDYLRRVGGTTLVWSGLAIRMLPEDFKIASLYGKGVDWPIDYDELEKWYCKAEKALGVAGDNNDNLGSFRSANYPFPPLHLPPADHWLKEQLEFREYNGQLFHLTNNPQTHNPEICEGSNSCSPVCPTGAKYTALTHIASAEKAGAKIQAKSVVYNINTDSANNVSSVDYLDWNKQSHNLSAKVVILTAHAIESAKILLLSSSPTNPNGLANSSNIVGHNLMDHSTAHAGGFTPEPVYPFRGPNTSAGVDIFRGGEERTKRAAFRVTSSNHGWLSSKDMQAMLVEGFKSNQNPADVRQECANRFNSQISFSGLVEQLPDINNRVSLGQGRDAMGLPRPAIHYDLGDYERKGQNALLDCQKWMVTASGSTLAHSSTSPDLQNHVAGTCRMGHDPATSVVNSDLRSHDHENLFIVGTSVFPTLGSSNPTLTATALSLRLADFIQQNHLPTLEAEN
>c527
MAETFDFIVVGGGTAGCLIAEKLASTATKPSVALFEAGDKQDSDSLRQTYHRFALAVTHPELNYGSKSTPQAHYGGRQIDMIRGKGLGGSSQINFQVWSLGARGEFDAWAERTKAQEWGFESILNSIKKIENATVKIPTGWEKFSQQSADCHGFSGPIEVSIGPLIEPEAKHILETAAELGYPINLDQNDGNPIGFGLSLNSNKKGFRTTSDSAFLNKSLPNLQIYRDSFVTKIIFDRKRAIGVQCNGSEYFASKEVILTAGSIGSPHVLLHSGIGPFYELQSLGIDVVQDLPGVGKGFSDHPCIPVVYHMGHGFSERVSFSSDEVKISAAEHELKSSKTGPLTQYMSSAVTAFLQLPGIVDLEGFNQLPSESRELLLNKTTPHFELAMPGPLIPPTYVFEDKQDGYLTMFITLMNPQSKGSVSIASADPNIPPVIDPNYLASPFDRAALMEATKETLRILDAPYLKQYIKHPILAPSSSNDEDIEASIIPPCTVKMGTPDDSMSCVDSHLKVFGLQNLRVADISVTPLLPRYV
>c528
MAETHYDVAIVGAGFSGPILAAKIAQLGVHPQTRDKLKVALIEAGPYFKGAPRPGYGSPLRRQMFTNMRDGSELAYLWGGDMSRAKLVGGTSVHWDAQAFLPFPIDYVLWEKETGVDWTEENLREAVAEIRRVFNVHPFPDEVDTPGNKLFYQVAKRMGYDPRRGETARKNCLYCGYCSSPIMCKYDSRAGTLVTYIPVAEENGVDIIPDTTVEKILIEAKNGRGKATGFACTSAGRNFQITADKIMVSCGYLGTPLLLMRSGYGPSDWRGNPIQVVNNNIGKHIDGHPFTAGVSALFDDFLGDGKERSVGGYYMIHDDRADGEGRLLFRAGFGVHRFPDREALNAFAPEFGRAHKQFMKEGGYLRIGSLNPSLSKPSGRWYMDPDGKLLYGGDHSLTIRRAQEGMEIARAILKEMGARKILPAESKVRIAPQNGGAHKVGSCRAGVDPKMSVVNPHFESHDVDNLWICDGSVIPRVTTGNSGTPQASVSVFAAQRIIERHFS
>c529
MAETNKTYDFIVVGAGPAGCTIAARLADSNAQPSVLLLEAGADDGTDMTKRMSSNRFMQRYDESQTWGYESEPTESLGDRGFPLDRGKGLGGSTAVNFSCWTRGPKDDMDEMARLTGDSSWEWERTVECFKSIESFHGDLEEMPKGAGNYIQSTQNTSYGTDGPIHISFPQKWDAEVTDMIDIWKENGYALNKDLSDGSMLGLSVTPSTEYRGVRVTAADVLFPRPSNLNIMVEAPVHRVLFDEQKRATGVQLIDGRQLHVSKEVIISAGALDSPKILMHSGIGPEDQLTKFDIPVLHDLPGVGANYADHYHASFVWRRKEHTSIRPDFFSDPKRIEKAQRDWELYRTGDYVTLGTQLSTGFFKSEATLKSAEFQALPDKEKQRMWKPTIPTYEIVWNATAPMYYETTKKLPALSVALLILLNSQGRGAFTLQSADPALPLRFAPDFLRAPYDRRAAVEATRELLKVTSSEAFQRDNVQAVFAPASDSDEDILAFWRDTTSSTWHMCGTIMMATKADGEGDGGDPGCVDTGFCVHGVEGLRVADMSIMPILPSAHTQSTAYQIGMIAAEKLIEEYDLSVARSRL
>c530
MAETRQAEQADIVVVGSGVAGALVAYELARAGKSVLMLEAGPRLPRWEIVERFRNQADKMDFMAPYPSTPWAPHPEYGPDNNYLILKGEHKFDSQYIRAVGGTTWHWAASTWRFLPNDFKLRSVYGIARDWPIQYDDLERYYGRAEAALGVWGPNDEELGSPRSQPYPMAPLPLSFNERTVKDALNAHDPALRVVTEPVARNSRPYDGRPTCCGNNNCMPICPIGAMYNGIVHVEKAEQAGARLIENAVVYKLEVGAGKRIVAAHYKDPKGVDHRVEGKWFVLAANGIETPKLMLMSTGADFPKGVGNRSDMVGRNLMDHPGTGVSFYADRKLWPGRGPQEMTSLIGFRDGPFRATQAGKKLHLSNISRIEQETTRIFKAGKLLKPAELDARIRDQAARYVQFDSFHEILPLPENRIVPSATGTDALGIPRPEITYRIDDYVKRSAVHTREVYATAARVLGGTDVQFHDDFAPNNHITGATIMGSDPKDSVVDKDCRTFDHPNLFISSSATMPTVGTVNVTLTIAALALRIADQLKKEA
>c531
MAETSYDLIVTGAGTGGIIMAARIAQKGVHPTTGEPLKVALLDLGPYFEGTPRPGYGVPGRRQMFTNVRSDFQGRYRTRRGIPPGASRRIPLGPDDETYTFNTAGIVGGGSLLYTAITNTPYEADYQVWSDETGLDLSYQNLKYAAEETERAFNIHTKPDGLLRVGDRLFRDSARALGIEVHPAKIAKQNCLWCGYCDGVNMCKYDARGGSFTGYLPTALEHGVEIIPDAKAEKVLIEKQGTGFRVTGVAYIRNGEREVVNATRVVVSCGQYGSTPLLLRSGYGPRQLVEQLIVENPNVGNHTDARPWCERMTAVFDQP
>c532
MAETYDFIIIGAGSAGCVLANRLSEDRHATVLLLEADGRDRDPLIHIPIGIGKLWQERLHDWGYHTEVTRQAPLARFAGEEIFPGSGAATEQDLKASIREGAGTFHHACGTCRMGSDEGAVVDAQLRVRGIERLRVIDASVLPDIVGANINACVIMVAEKASDQTRGRQPLAASAAPSGLPW
>c533
MAETYDVIICGAGSGGGFLAGEIAPYASVLILDAGPYVDGTPKPGIGSPERRKFSTQINLGQYIPDGVYAINRGSTFFAYPIFMDESNPASSAVQREARVVGGGSLINVGAWVRPRLVDWDGFVEETGIQGWTKEAFEPHFLKAEKILHVHRDNRKNWNKASVIYEQTAASMGIPVFETASNRYHCIFCGHRLNAGMPCKYDALMSTAVTQIPKAIQHGAIMADNATVVKVEISSNRTATGVTYTRNGETVTANARKLVVVSSGAMGTPLILFNSDVHRLNKNVGQYLRAHPGIAMDALVPGQDWNSDRGYQWNCNHFVMDKNGQPMDVLVHASASFPAATPWTTAQVGFFGKPYKDLMRQFQQRVGAFLFQLKPKIHGRVVGSVEQPLVFYPVAGTDGLLEPKILTDLLAAVRQVADVFKRMGSITTFPNPDEPEDILKTQLTQLITFANALHPQGTCRSGGNPKNSVVDTNLMSWDVKNLMCCDASVIPNHISSNPNAMIMATASRASEFVIQQILGRSLPQTGQ
>c534
MAEVSPGSGSGRPERVGALVVGSGFGGSVAAYRLAEAGRSVVVLERGRAYPPGSFPRTPAELGRALWDPSEGLYGLFDVWRFGGCDSLVASGLGGGSLIYANVLLRKEPHWFVRREELPGGGHERWPLTRADLDPHYDAVESVLRPVPYPVDTEPYARTPKTRALREAAGRAGLPWSPAPLAVSFAPHPGAPPGPGLPLTDEPYGNLHGVPRGTCRLTGECDLGCNNGAKNTLDHTYLSAARHHGADLRTGHQAVTVEPLEDGGYRVGYVVHDTDGTGPPVRTADLPRRLIDCDRLVLAAGTYGTVHLLLANRARLPGLGPALGTRFCGNGDLLTFLYGRRGTPVPPPDRGPVITGVVGEADGGPGRGHIVQDGGYPGFLNWLAEGVRLVGGAGRLAAFAAGLARDHVLGSADSNLSGEIAALLGPGGGFPGVLPLLGVGRDVPDGVMGLRDGRLDVRWTTATSRAYYEGVRTTMRRLADAMGTGFLDNPVWWWRRVVTVHPVGGAPIGDRPEEAVCDPYGEVFGHPRLYVADAAALPGPVGVNPSLTIAALADRMSTRLLADRPPRRAHRPAPAPATALTFAEVMRGALADGPGLVLRLTVTVDDVDAFIDSPDHRAAVRGAVDCDPLGGRLSVREGWFNLFVPGGLPRHRRMLYHLHLDGPQGRPLTLTGRKEMGDAPGPDLWADTTTLAVEVHPGRHTPGEEPGAAPLCSGVVRVGRLDFVRQLASMRATGPAPLAALARFGEFFAGELWGVYGPGR
>c535
MAEVVRKALETPLKKLVEKSSEIDVLIIGSGTAGITAAIALAEKNTGLNIALLEAGPLTLLEHVGSSSVRLNARVVNQLQDQIVYKTLWGGNEKGEQPNTNGWSAVGGRTLLWGGYIPRFIPEDFSDWPFNYADFEPYYKRAEDLICAAPREGVPAFVRTKGQDKFMKELKKHGFSFQESPLAIDSSCSENGNLPVGYDSSIARLIRSESLVTFGEKPGISLTSEVEVISLEKKGDRITAVHVVDRKTDASYVLSPKKVVIACGGAQSVRLVLASKIEENEDILGKYINDHLFARGFLKRRKGIWENLMHLYSPPTSQKLFHCQICGPLTMEKVEFLRNNWTALPTKWLEWNSPGDCLEYQFFGIATTEKENRLELIENRDSPFGRLPSCKVIYKRSQRDLAILDEMKKNIENLSLAIDAELINWEVLPPGTALHDIGGLRMGKDPETSIVNPSGQFWRIQNLYVADASSWPSQGSANPYLTITAWALKLADEMRFSNG
>c536
MAEYFDYIVVGGGTAGLTAGGTGINRPSISIPAMMATNLHTDIDWDYSKVPQEGANQQKISYPRGKVLGGTSSINAMLSTWAEAEDYETIERLGNPGWGSKEIEKAFKKTERLINPPLNSPYIFNPGNHGIDGPVTNSFPKFIPPQYLPYFPACAAAGHVIQDKDSFAGNMEGAYIYPSAIDEKGFRVTSATAHYFPIKSRSNLIVRTDCEVDKLIVTSTDTTNSRITILGVEYYSSGTLGRAMVRHEVIMSAGVIGTPVILERSGMGKESILKPLDIPIALNLEGVGSNLLDHLRVTSSYRLKAGHKTVEDLFRDPDYAAQQKSIYEQSGGGLLSHWFSVADFQSLKSFVGEDGMPQGMKLLEDCPSCTSPSQFDAVVNRIKNGRAIEFSLVNAFIVRDQLQSTPRNHLILLAVNCQRLKIGNDL
>c537
MAFAFSIRCLLLGVIRLAVAVIIRDPSTVNRTYDYIVAGGGLTGLVVANRLTEDPNTSVLVVEYGDFDDRWDVAIPYHARFLHTEDLFEIPSEPQKGLWNRSFSVWLRKTVGGGSTVNGMALSRGARADYDAWEALGNPGWGWEGMFPYFKRSSSLTYPGPELVHKYGYVVSPEGYGRGPMQAGFPKWQFPALNNYIDAWTKDIGVEYRTDGDTNGENIGMAWKPIDIDPVNITRSSARKAYYDPASGRANLDILVGCYVATLDTDPSASVTGVNVRVARVNSSSTKQIFLRSGKEVILAAGAVHTTKILQLSGIGPAALLQPLGIGIVVDLPGVGANFQDHPTNNGYSFKFLNEPSLNPNLYDEASFYNESWDEYMANRTGPLTWAFGNNRVVLSLNNLTNDYQALMDDFLHGNETSQYLDDWHKQHPVLEAGYKLQHQIMAQVISEKHGSVMESVFGGAAGSPFTVVKPFSRGTVLINSTNPDPILGAPQVNYQALTHPFDMKLAIEGLKMVRKLLSTPSMALLHPVEIVPGANVTTEAQIEEAIRTILYRPSNSHPCCTAAMLPLELGGVVDPQLRVYGVQGLRIVDASILPLIPSAHTQETMYAVGEKAADVIKGVNGYR
>c538
MAFDFDAIVLGTGFGGCVAAIELAVNQGKKVLLLERGVWWYSPEVPLPPWIKGHPEEPVQFWPRPNHTEGLIHLLSVVQSNSRLERTRRIFDVVGEALGRAHPQPLYRYSMFPDVHVVTASGMGGGSLVYGNVSMEPRWDDDAGNYPVMSGWPVAALARDDFKAARAWMETHRGKLSQVVSKFPLPGRPPLNPTSADDDQLFLRKSRALYRATHNLAGPWKDKRIRQGTAADGSDEYWAPLDLSITEYAGKPQFCERQGRCIIGCLPGARHTLPKTILNTLLDPPAGSPRPDVTLRTMAEVQTIRPLPDGGYEVSYRDLRQAQSRFDPTEVPLRVVRAPVVVLAAGTLGSTELLMRSRGHGLELSDALGSRFSSNGDFSGFAILPAQPGQNDLFPVFPTRGPTNTSHVMFADGELQMTVEDGGIPAMLASVGAAGLQVLDNALHREPLLKALVGGFLHGQHSGLRDVTGALADGTEDEKLAHVFWFNCLGTDKANGRFHLDDNDNLTLGYNYPALALHPVFAKLDEVMRAMTQAMGGHFVPFPLWEGLADRKLVTIFPLGGCPMGPTSTEGVVDQTGQVFDTARGRQSTHSGLYVMDASVIPGPLAVQPTLTIVALALKAAAAMQ
>c539
MAFDGIVTVQRALSVVALLLSSYLFPEQTQVKDYHKYDFIVVGGGAAGGAAADRLSECGRYDVLVVEAGGDPPTESVLPGLFSFLPHSKYEWNFTSVNDSEYLKESHGIGALGLTSGRMLGGGSSINYMIYARGCPGDFDSWADDTKDDRWNYDNVLPYFRKSERLESSEILYSADGFYHGTDGFLGITREGRPDTARYLDAFKEAGHKILNDANGRDNIGFTLPQYMISGGMRQSSAYVNLGAHKDRTNLHVLKNSLVVEVIFDSDNNAIGVKVVTDDNRVITVLANREVILSAGAFNTPKLLMLSGVGPKQHLQSLGIKVRSDLPVGKNLQNHVLSLVSFKMENSTAKSAPQDPHEMPFPIVLGYGRVDESQTCPEYQVFNFIIPNDSEAPFDLCSFNLGFTEPICQGFLDAVKGRNTLLATITVLHPESKGQVTLRSTDPFDPPLIEPRILSEERDLDAFTSYLQDYLRVLNTTYFRSVNAEVVELDLPGCKGHEFGSRAYWKCYLRYMNGGMFHDVGTCSMGAVLDSELRVLGVRRLRVADTSALPSLPSGNTNAAAVLVAERLADLLKRDHPVEFVPEGGCDADSGYVSTIYCYVNQYFGW
>c540
MAFDQNTLRSQFCHALSEMYKSEVPLYGDLIDVVWEADAKTVQNSQNIEGDSVINPDDILPARHRVERHGAIRLGTAHELATIRRMFAVMGMHPVGYYDLSLAGFPMHATAFRPNTQEALDKNPFRVFTTVLRMELLTESTRKLAQKALEQRNIFTPRLLALLDIAESQGFLTPDQCTELISNGLETFRWHSKATVTLEEYEQLKAEHPLIADVVSFPNSHINHLTPRTIDIDLVQQLMLDHGMPAKDRIEGPPKRSCPILLRQTSFKALEETVYFKDSSGSYVKGSHTARFGEVEQRGYALTRKGRQLYDRILNRVNTEAAESGLQGKTYDTLLEERFKEFPDSLSELHDLKLGYFTYRLTPLGDQSVNESFVLSEEPISLQDLLDKQILSYEAITYEDFLPLSAGGIFNSNLGGVSQSKQLIMSADPDLDGFQHLLGKCVADEFHLYAEMQQKSLETCRQKLRLKEIIILQFIHQSMTTVYHASATCKMERKNDTMAVVDSHGGLKVVDASSFPFLPPGHSQSIAYAFAEKIADRILGFVD
>c541
MAFDSFSDARSFADDPGLEADICIMGAGAAGITLASALADSGLRICLLEAGGMDMDPAVEDASIIPDIGRPYDVAANRLRFFGGATNHWGGHCVRLEPDDFEPKDWVPMSGWPFGADTLAPYYRQAHDFLGLGDYAYDPAPVARALGTRLMPFDGPMLKSQLSRYRRVFYGYEYGPRLDRAPNVRVVLYADVCDIRLAEASGETVSHVVVRSPAGNRFELRARYFVLAAGGIEIPRMLLVANGQRPAGLGNENDLVGRYFQEHLMFKSGLLLPRDPADVLPLYLSEVPYGEIAVRCHLVLTAEAVRARRIGKFRSEFYSLPLRVRDLNALRRGRIDAADIAGLLGDPFGSAQAYRCGSNARHDTYGLFNNIEQMPNPASRISLRSDKDVYGRPQAQLDWQITRQDHDCILAAHQVIAEEAGRTGFGRMRIEIDPEPEVFLDGVGGGGHHMGTVRMAEDPRRGVTDGDGRLHSVQNLYVAGSALFPTGGYPNPTLTITAMAFRLSDHLKARAEREGLL
>c542
MAFDYIVIGAGTAGIPVAVRLAEAGSTVALIEAGSLHHLGNGNFSQVPLYASAFQHTYPGSVINPIVDWNLTTTPQAGLNRLYPQGKAVGGTSTRSHQAFTFAPKSSYQEWADAVDDQSYTWESITPYLTKPINFTVPSLSYRFSNSTARSPPHWKNHTSGPLQITFSNYVWPWATWIKKALVGLGFEENLDGFVGGSLHGVAHQLLTLDATSFTKETSDSSYLNRLGINNGNLVVYTNALATRILFDASKTANGVEFDRGGLLLKLSCRKEVIVSAGAFRSPQLLMLSGIGPKATLERHGINVISDLAGVGQNLGDHVCAGISRRVSVPTTAELQWNADAAAQALKDYESSPPRGAYTTYAADLLAFEKLPQRYRRKLERSARNSLDNLDADRPELEFVAFSAYGGPHSGFLGSPDGHNWATLAVALVSPFSRGNVSIMSDRAQDNPIVNPAWMSDPRDPEIALQAFRRLQDILNSTFLAPVLVGHEAFPPASALETDSQVLAFVRTYANPLFQASGTAKMGRKSDPMAVIDSKARVFGVKNVRVVDASSLPILLPSHIQGTIYGLAEKIADDIIRMEKYDVAGPELYSTDVIPGQVRLGMHD
>c543
MAFFVIIVAVALLVLLSRVVYHFLCRRPGLKDDWPCVPDCRVQERVGKWPTLPRGRLKYITATEFRTLCALCDTVLPAFEAEDVPKAIRAYLMELVGSDDLFERLSTDMSYYTRGALDADVPARVGDIVEEDLRPDARKIVRMVLYALEMPLGLFFLTGGTWYGWGTGFSSMPFRQREAVFGRLLTSIIEPIRGLAILIKAMAGRIYFAARDTPPSTPGGTPTNPSWTALGYQDRTRDRVRSVMGGKPLRKPQLHPLRRDSIPPSCVGGGTDVRELSCDVVIVGSGAGGGTAAGVLTAAGLKVVVLEKGGYYSEEDFAGFGELDSERALCERSGWMGAQELSVSILAGSCVGGGTTLNWCASFRTPEHVRREWVDKHGLTCFGGAEYDQALDAVARRLNLNTRHSHRNPEVASVPSLVVNQNNERLWQGAKAVGARCLPVPRNVRGCEDCSGCERGCPYGAKQSTLRTFLEDAENTGNFKLVARAHVDKVLRNDDNDAVGVIATVHEERRLAEGRESDGEGRPPSGHRPGPSTSSRYQLIVWAHHAVILSAGSLHSPAVLLRSGLKHHKIGRHLALHPVSGVAGLFPSETSDTHLGVGMGTYVSDFMGGEMKDGWGGAIETPPSHAGLAGVIAPYGTAFNYRMWVALKGHYAVSIVISRDESCAANRVVIDNDGEPQVHYLLTKKDQANLQYSVGVMLKMMIAQGAALALPVNESMRTYRPHRDEASGTTRGGKGMSEYLKYVRKMGTPVGNTALFSAHQMCSCRMGSTEEAGPVQVTGETWEVEKLYVMDASVFPTSLGINPMVTIESISFMLSKKLAVKIKGPDAEKAISVKYCVPSTEEAIGNVSYPEGPTLKGEYCAW
>c544
MAFGRSAHADRTAAPATDYGTPAVRSNKLHRPLLAANHALHTISSIIVLGISAYFINSYTHNTHLRYWVALAAIDTFLYLPALALPAVKKYKGYLAPLAWILSYLWLTAFIFAAQDYEYNGGCAANSPSGVSKCSLKRTIEAFAFIAFFTSLVGTLLEARLWDVQRFKDQSLYTPLRPIDLDLDHRPLALKLATDDESAIPRFKTNPPPALTIVKQPYDDRPTSNFFQLPAELRNNIYELLLRKQQHLVVNFEAPRNPGRSVVIRPGGTGGLTVAGRLTEDPNVTVLVIEYGPSDQREDEVMIPGAYFPVPYLWLPLTSTPQAALNDMSYSVPCGRAVLEDGPDQEYAAKHNISWDDAVYGFDGPVQASYAPYDYPGSGKYIYEHGLFLANTAVSRVFFKGKIAVGGEFVGVRGAFNGSVTAKKEVIIAAGAVHTPQIRQLSGLGGAIYLGKLGIESVVDLPGIGQNLQDHLVLKIKFNYISNHFLNGGSLQSNAIYAAEQRALYNASKPSAYDLTATTDPTVLRGFKKQRKAMLRNINSAIVGGLSWNIGPETSIYMTRPFSRGSMKVISTSVLEGPLIEYGALTDSEDLEVLYAISMENRELMSTPDMAVLGPIETAQASGIDDASPVKDAIVEALAPSDAHQCCTVTVMRREDNGVVDAQNRVYGTKRLSIVDASLWPLVVGGGP
>c545
MAFIDARTLPDASRIDADLVIIGGGLAGITLARELAGGPLKVAILESGGREIDAEIQALYAGTAVVKAPDNPDKPFDDYPIQSRARVLGGSGMVWGGKCVPLDPADFAARPWVPHSGWPLTRRRMQPFYDRACDLLEIPRFDADNKMLKDPARPPLALDPRDGFFSAPRVLTRYSGGADKDAFDRFRTDFADAANITVYLHANVTQIRQTAKGDEVEGLDVACLDGKRHAAVGKTYVLAVGGIENARLLLASNSVRPEGIGNRHDLVGRFFQGHVTYSQDSDAETEGTAIHISGQASMGLYSTLRRSLPQCVVAAGLPAQARMGTGNFTATFNGVVQTETATPPEVETQAMRRIASRVDANSQGKGQLFGFFGMSEHLPNPDSRVTLNPSVKDPLGLPRIHLEWRYGKADWDNLERSAAGFGDALGASGQGRVCWPIKRGQLLEISSASRHHMGATRMSADPTKGVVDPDLRVHEISNLYIAGSSVFPTSGIANPTLTILALVMRLADHLKRDMGARR
>c546
MAFIRIYEQDALLDAQQSIDYIIVGGGLVGCVIATRLAQADLSSSVLLIEAGTDPRNNEDTKTPAGALALHNSDLDWAYMSTPQKNLNGRTIYNAAGRGLSGGTNINYGAWARGDARDWNAWAKAIGDDSWNYENMLPFFRKTETHYNPKADPRQHGFDGPIHYNLASTAHPDAPFPLREQIFKAFIELGLKPIEDGNAGETEGVFELGQAWRDGKRQPAAIAYGLNGVKVLLETMVHRVLFDKTAEGTPTAIGVELVGGRKILAKKEVIVSAGAIRSTQILKLSGIGASSELQQHGIDVVVDNSDVGRNCFDHYTVFQFWKLRKPEDGLAVGPLWTNPGYLTTMPLEWCANESVPKDVLKKAFAADGVEIEDDNPYLALTHYKIILAYAPMVADWIGADIPVDGSHIATATMLQHPTSRGEVRLHSTNPIDPPLINANYCDTEVDRLILNQGTRRATTLMLETAAMKETIQGETPPRGMEPVTSNSRREVIETRVRSCGHTLFHLSGSLPMGKVVDSKFQVKGVNGLRVADASIMPSPISSPIQAPLYAVGERVAETILKG
>c547
MAFITDLAKVATTDATNRRADYDFIIVGGGTAGCVLASRLSETKATKVLLLEAGGSSKAVLFTQTPVAYGQLFRTEHAFQIFTEPQEGLGGKSKFWPRGKLLGGSSSINAQIAHYGSPEDYDEWANITKDKTWSWNEFATFENGPVRVGYFNYSTRFGQDFVKSCQALDVPFCPDFDNGKGTLGVNRLMTYIDEKATRVSTETAYLTPQVLARSNLKVVTGVKVTKILFDTTTIQPKAVGVQMQSTLGGTTYYAFTNKDVILAAGAIHTPHILMLSGIGPASHLREHDVAVVKDLENVGAHLQDHPVFDIHLKDKLQLAPVFLMRKGFIQNFRYFLTTLQYLIFHTGPLAINWGEAAAFIRTDDPKLFPRNEYPDRLPDTTSGPDSPDIEIFSTPLSYKDHGGFLFSEHTRALHVCLLRPSSEGLIRLKSSDPWSDPSVDPKYLQADQDIEKILRGIRFALQIQKTEPIASHIDFEDPAFDGKLNEYSNDQLKQEISERLETLYHPMGTCRMSASEDEGVVDSELRVHGVNGLRICDASVFPSMVSGHSAAAVIATAEKLADVLQNQ
>c548
MAFLALILAPCLLSACKTQNLPPMHEATDSKFHPQLYDYIVVGGGTAGCPLAATLSQKFRVLLLERGGSPLIKAGVTPDNGASYDFQVGTQTGGTIFDDQGTRRPASNLLVYANPRNLDILLHAQVELILFRGEVSNTYLWQDDLGIFSWQEIEVMESSTPGSPQLLLLSGVGPANQLTAMGIKVVYNLPGVGKQVSDNPAALVNIVSPSPVESALAQVVGITAPFGNFIEAACGVAVTGVPGARAGNIIEKVAGPLSSGTLVLQSKHVRDNPLVTFNYFQHPRDLQACIAGVNTIEERTLDDHMALPRWLLS
>c549
MAFLFSRQGPKDYPIAQCASLTTAKPDTPASSAPQPPQDSPLYDYIVIGAGTAGCVLANRLSQDGSKQVLVLERGTYMSDTVAKIPLLSSGRAMQEFYTTTIKSEPQSAFEGRTSTLQVGRMVGGSSAINATVYSRGAHCEYDSWECEGWRGADLDKYFIKSEKLHTEPDQPSPPPSRGTAGPWQIRITKPTLGFNDPFLTACNDTGITRTSDPHAYEGGDGPVATASWSVQAAQTPDGSRHHAGFAYLPEDVLRHRDNLKLCVDAGVERVELKEHAGKLVIQGVWVVQKGKVYFARGKRVIVSSGAIFSPCILQRSGLGPAPLLKSLSIPVLADLPGVGSKLTDHFLVPLHFSGPMQDSAYQLVRGAWALPSLIRQALTYWRTGRGLFSTACTMESMSYFCTQDVEVLPEGTGTSTHDRVRVRCKDPRKHIPDVELTISGIWADEKMPQYHGLGKRGVICFLVLLVKPSSEGTVEIKSTKEEDFPRVDPHYMEAESDVQALRTGIRVALTVAAHMRNSIGYDIGPACVPGWKPMEGGWDDECLPTIPPSTKDTNMSAEFDFIDPVKIPDATIDAFVRKHAFGAQHMASTCRMGPASTGAVLDPATLEVYGTEGLSVCDGSIFPRVLSVHPSAAIVATAEKYADDLIQSS
>c550
MAFLHIRALVLLYHILLASLLVQPARSQAQYDYIVIGSGPGGGPLAVNLAKAGHSVLLLEAGDTSVAQGSGQYPSSITWDFFVKHYEEDARNIRNNQVTWRLPNGRYWTGNKDVPAGAQLLGIYYPRGATVGGSSMINAMATHLPTDSDWDYIVNLTNDTSWSAANMRNVFVRIEKNNYLPAGTPGHGFNGWFQTHIAPTFGGITGVVGDVLRAMATLLGQDPNQITQYASRDNNQLSSTRDREVGIYGLARHTRSNGQRYSSRDYVIESINAGGLPLTLSQNSLATKILFNTSGSKPRATGVEYLVRGFR
>c551
MAFLNYDVVIVGSGVAGAQMAYQFAKNGLYVLVVEAGDVIPNVAQQYPVKQDALDKYFSAPIKDPSAPWPQPKDPNVSWADSKIYAPRPTSPGVNSNNTNGVDWKDQEGNYMQQKAAYAYGSTYERVAGGTTKHWLGTCLRFVPDDFKVMSVYKPPVPGGYDWPIGYSDLEKYYTQAEKEIGVAGDPTVDNAMGAKHSESYPMTPVPQSYLDNVLKTRLQGQTIDGNALNVVGTPQGRNTKVYDGRPACMGNSSCVPICPINAKYDAGVHVSKITSDPALSKYVTFAPRFVAVELKVGADDQISGIFCKSWDPNSGAGNGILFSAKQYVIAAHAVETAKLLLNSPWKNNKTVANSSDMVGRHLMDHICLVVWGNVKKMSGSGYEPVFPYRGPMSTSGIESFRNDPKQRPKTAAFRIEIGNDGWSWPYGGPGYNVGDLIGAARSFSIAQTYGPDLVAKLKETVQSQVRFALELETISGDETMESRVQLSSEVDAMGIPRPTVSYKLPQYTLDGYVYAQAVANQLLGKANIDNKTVLQGGPGTMKFKPTGSSQEITIEFRGAGHSIGTHRMGSDPQKSVVNKDLQSWDHSNLYLVGSGAFPSTATSNPTLTIAALALRAAETITAKIKAAVKSGSEVPA
>c552
MAFPESSQIGFNLATFACGLNHGHKKRGGGSVIFSILLAVLVLQVSTEPLQYVLIMGSPSVVAEQRVNSPRRGGIGNIVDIASDVEDVMRLQKPSTLPPLTVLVGGHNMNSTGFPLQTEESLPAEHLTKQTNPTTSIPFPEEGSLGENLGSRSTLWTPKGNASEREKTPADRNATEPQQGPHAPRQSSPDRKANLKSDRGRRPEIATCEVGLLMVEGSCVFVEEDKLFDFIVVGCGAVGCPMARTLADAGKRVLVLERGKERTREKTPHAVDIFGAGRAVADETVAQLIQTNQGVRSQTAGVMGGGTSINMGIVAMETSGFFEYLNEEHGWRLDMDLLNEAQRWISKAFKPMPQDTQYVSRLAMSLQDEGYKPLFPSDERAKDFNCPRSGLGCTAKILPGHVWGGVTVFDKEKNFFRNAADVFVYEAPGVPAHPDRLLVKTEQFVERVLFATSKVSQPRAVCVSYRPSSAEDMAPIGLDAPPPQKTGESRGLLSSLLSYALQMLEWIWPNDSSLEIACLRGQGEIILSAGAVHTPLLLFRSGVGPQEQLQEIGVPAVAVVEELGRNLSDRILIPIQMFQKDNKRKEDRNPRVCQVLGARHQGPHCDGVGINERTLKCSLLTTEELSGPNVIHGLLWASHLLLPPSWRDHPAAHAVFNFVRFCEGKMKFQGTLQYPPACMFVEGLLDCLDRSISLFYFTTEPKSRGYIRQHKDGRVEVEANYLKNEQDLFDATRGVQSLIQQVNGGRFADIVEPLQPGSCPVLMLYTVVSLFLDFAQAADLPQYEKQLLSVRRHSTDLQTHHHEQARATMPSASEDELPFLRLIQNLTESRGGLKNEKQPSAIRAAANDPERSEGAAAHGTAAQPAEGFEEDLGKVFKDREKLKRLFENGSAQQRRRQTNMLPETTKQSSQKKDELAPQSRVCAADAEPACKDGPIHSDVYTTTCSAHDIFTKRYGSSACSSSPDASTAQAESPESFISWQAGLAEAGIQQFFGERLPPGSGQWAATYPPVLPQVDDPEAVAAFAVTYMTSIWHLAGTAAVGHVVDHEFRVMGTKNLSIADASVLNQMTRLNPTATLLTLGRYIGLLKVKSSERNTNNDRKSGEHGRKGGL
>c553
MAFSFAQSLAVGWFGLTLLCPQVSAALYEDPSQLPARTYDYIVVGSGAGGGTVASRLASTYDVLVIEAGINDIEDPEIEIPFVAPTLTPHTLVDWNFTTVDIPGLNGRNYSYPRGFVLGGSTSVNTLAYNRGSRDDWDRYANVTGDYGWSWDSMEPYFFALEHLSPSASNESYDGKIEVEIHGTNGPLGISGDNFPLQIDPLILNASSEVGGEFAFNPDVNRGDMIGISWQQQTIAGGQRVSSARAFIDPIINGSNLDVVLNTRVLKLLQTGTVDGLPSFQGVQFATSPTAQVYNLTAAKEVILSAGTVMTPAILMHSGIGDSAELESVGIETIVNIPDLGKNVQDHPLTALTWTVNSNSTLDNVTSDANFAAYASEEWETSRTGPFTVTGGNLWGWHRVAANSSIFDNTTDPSAGETSAHYETIFFDLGIDFSGGTVPPGHYITALVNLIAPSSRGTIALSTSDPWTLPLLNPNILNTTFDVQVLIEGYHNLRSFLSTPAWSDYILEPFGSGANATTDEELEQFARNTAITLSHVVGSASMSPATSNASESGGGVVNPDLTVKGTAGLRVVDASILPFIPSGHTSGATYLVGMRAADLILGGATMNATVTA
>c554
MAFSKDGLKVLESIADTVFGELSASDTAELVNLYARSSRGTPKASVRSLEDMVAFSKLKASDFDVVQDLVKKLQMFLPKTTLMGMSFILSMLSTSAGNYMLTGYAQPFQTMSLEDRTGALRYLGKIGRKGTFIPVIDSTLAALFMGFTAGISLSVYSVLNEKRENPVWKAIGFPGADPVIFERLAGRSAYPTQYPFKFLDVQGHNNSTVVLHYDAVVIGSGAGGGIVAAELSTQGLKVLVLEKGILFKPEDITTMEADALPNLYENGGVVSTEDGNVGILAGSSFGGGTTINWSGSLKLPQWARQEWADEHGLPFFASAEYEKNSVLVLERAGVSTKHIKHNGSNQILIDGCNKLGLPVHDIPQNTGGHTHSCGFCHYGCPAQEKQGAVATWLKDAANAGCHFLLRANVRHVIHQNGKAVGVDALVTTKTGTARVVIKALTVVVSAGSLNTPAILKRSGLKNKHIGKHLRLHPAIGVAAVFPDREVRGFDGSIMTACCDAEENQDGKGYGVRIEVPVHFPSILSTLSVWRSPLDHKSFMMFMDKISMIVLHCRERYSEGEVNIDSEGNPLFKYTLDPHDAKHLTAGLVASVKILAAAGGQQITTSQLRVDQYKKDFDDSRDTLETPEFQRYVNGVATEGINMGWTRISSAHQMGSCRLSSSPERGPLDPEGQTWEVKGLWVADASTLPTASGVNPMATVWSIAYSIAQNIKQGLKVTDSPSASASASARL
>c555
MAFSVIFLLKKTILLVIISIILKSRNTYGIETYNDNDQVPSGIKFDYIIVGAGANGLITARSLLEKYTRRGDEISILIVDKGREYKENELNDEKQTKDNKKNNNENNKLNSSYNPIIDKSDINIYTSEDGYMIFDSSIEGGKTSYGNTPFIPEDVYSGEYYKSLGLNFDPQKLQESFEFVKSVGDIVQPNVRTSWVIALERAFNETGTFHVGDTNEEDLAPEDSLFENEMTESGYVSSFGIRDNNLEWKTDIVENEYYQDYTATNKDNNLESFNNGAPEYFTSSHYVPYTFLTYGFRRSFERRSATKLLKIDPRLVNHKKLFKILNFHVDKVIFSSLDKDQRENNKFAECIQGKRLTGRYNYSRIKEEVYSKIEKYCIKSGKGKIILSAGALNTPMILQRSGVGSKEDIQISSPGIKNPIIENEHVGKGLRDHPSLSIFGFFRGLSTDHVRIPSSEALFSKRKFGAKCKKQEERDDIIQGCESVSISEFEGFTNNISEIFAEQNIGKECSALIRGVTIRVPNPYSEGEILWDENNKRPKIRLGLLEDINDLLILEAGFRRLVRLFRSINISTLLLPNNSTHKRVNLFGDHAERKLLLNFADFGNYNNNYTSTSRAIGTEMNHERCNLSNISLYYASQNQNYGHIKEKENDSNINFNNLEEEEEKVANVRKGLEIFDKRGDLSNDQTKSNNGRFNYLKEIHDKFRFQNEGMQSSYYSIMHTFDKSRRDEEKDDIILMKYDASASINNRIDSRYNFFGLRKGETIIDEKEDRSKNDEPSLWKSLPLILPKLPTYPEQIREYIKKNVKPGNEFVGTTAIGQVVETDCLKLIGAENLFILDEGVLSKHTSSNPIGTSMILSRYAITKIMYDMC
>c556
MAFTDYIIVGGGAAGGVLAKRLAEDAEKSVVLLESGPVDDNPFIHIPVAFGKLFKTDLDYQYFTEPEPTSGNRAMFWPRAKVLGGCTSMNAMVYIRGNKGDYDRWAETTGDASLAYDADALKYFKKAEHNERASIRDPSMTKLHGVGGPLNVTDRVVNVISEALLQAAVQRGGAPFVTDLNTPEQEGIGYVQTTTKYGFRAGTARQYIRPALAACNNLKLVTNAHVTRLVFSGDSNPTVVGVEYMDKTSKTIKTIMAKETILCGGALNSPQLLMLSGIGPREQLEQHGIKVVVDLPAVGENMQDHLLCSVCHEASQPVSIALAETDAEESMRQLQLFGTGPLSSNIAEICAFYKIRTDKIGSGGDDLFDHSLAYPTMQTHSAGSFYLEHGFKNPQPPQNPHGMFLAPGVVRPTSVGKVVLASADPFENVKIIPNYFSTPEDINVMVNGIKLAREIYQQEAMKKYLGPEIAPGPSVQTDAQLEEYARSFSETIYHPTSTCKMGSSPSDSVVDTKSHRVHGVQGIRVCDASIMPDVITGNTNAPTIMLAERAADYIVKDDMITIEKVRKTHQFFA
>c557
MAFVDTRSLGNGDVIEADICIIGAGPAGLAIATAFEGDSTRIALLESGDIGYDEETQSLAAGEIVGLPYPNLDSARLRMLGGSTNHWGGNIGLMDALDFEVRDWIPHSGWPFGREELLPYYKRAATFCGVPNEAFEIESQQSALDADPWLFVDDAIVSQVFQTVGGEARALGLYHEETLERAANVTTYLFANVVDIVTDALSNQVRELTIKTLNDKTLTARAKYYVLAAGGIENPRILLLANKTRPAGLGNQNDLVGRYFMEHLTSPDFALLFPSDPQLDLRFYKDFEADWGEAWGILTFSEEVQRQAGLVNARFQAATITNEFNKNIANPGMQSLATLVRSGSSGRVPDELERHLANVIADIDDVAESGYYRLFHHPDYPLVSIDLVVISEQIPNPESRVYLSDDKDRFGQNRCVLDWRITDLDSENLTRISEQVQLQFGRSGLGRVRIRLPEGGYTQINPHPHYHHMGTTRMDNDPKHGVVDANCRLHEASNLYLAGSSVFPTVGNVNPTFTIIALAYRLADHLKGLKS
>c558
MAFVTVARDGVPVTQARDVALDATLGKNFTLKTDVVVVGSGAAGALVAYEMAKAGRDVLVLEAGRYYPSAQFTEHLGDTMTKIYQDQVGQVNTTADVIFVGGACVGGSTVIGGCVMQQPSDAVFDGWAKRHELPQLSAENIKPYFDKVGEQLHVHTNEAHEINACAHKVIQGCEKMKFSWKPAQRNVKQCALTGHCLAGCPSDRKMSSLVTHLPWAAAYGARVFSDTEVVRVLTRNGRANGVEARITDPDSGAHVADMRVDADIVVLAAGAIQTPLIMQRSQLKDTSGQIGRNMTVQPFTQVLGKFPEPLYGFRGALVGVYVDEFTETDGYMILSGLAEPESLLAQGDMRAGKAHLEFMKDYKYYAGVNAFSVDSGRGYVQWDGDPYNGDKTIHWNPNHEEFENIKRSAALAARIFFSGGAEKVFLPTFQSLEADSVFNLDAQLDKVDYGLKGMYTFRANSFSPHGTCRMGADPYQYVVGPNGETHGTAGLFVADASLIPEPLVAPPQWTVQALAQYVSDRINQRADSLFLS
>c559
MAFWSFKLAEPGHECVDLSKASDWFQVTNTLPSMLVELHMSGCELNQIPVGVANMTRLKVVNLRWNIIWRTIPQWLYTCSNFKSLSLYLNLLRGEISSSTGNFTAIVNLDLSANQIDGKMPNSLGNLCKLAVLDLSRNYFNGSVSEILKRQLGCSFHEERQSHARRLGTESKKRYHPVVTNFLNTLMNFSRLHDYMTDFGYKHKTYRALNLFIIYVITTDPANVEYILKKHFANYGKTIWHYHGACQVGRVVDKGYGVLGIDSLRVIDGSTFYHTPGANPQATVMMLGRRVHGAKDSA
>c560
MAGAAVMNQKFDWCFNTVPQKGVNNRVTIQPRGKVLGGSSATNFLVTDRASAGEYDALEQMCNPGWNWDNLLEYFKKAETFHFPDRKLAKECKVAYQDKYHGSKGPIHSTHPSQVWDLYHPTQKAFGSCGISVNPDPEGGVNTGFVFTTSSVNPTTATRSFSTTGYYEPNAERPNLIVTQKLSGKTYKVSVKREVIVSAGIEKKDVLSKFNIPQLLELPVGDNLQDHCYARTTLQVASHHITADKFFGQDFAAREMENYQKTQGGAFASSTHTAYSYRPLSSFVSQEDIRAIERKAEAQLAENNSLSLIRHYELYKYWLADNSKAQVELFMHPGFVPGEGQDLVLAPGPDACYMTFISVLLHPFSDGSVHLQSADPLAAPAIDPGYLSNPIDLEILARSVLFTRKLAQTDALQERVVKHVRPEPSLQSLDDIKEYCKSALCPIYHPVGTAPMLPKARGGVVDSNLKVYGTANARVIDASVLPVELSAHLQSSLYGLAEKASLVALLLGGA
>c561
MAGAGGSDNYVWIHIPVGYLYTINNPRTDWRYFTEADPGLNGRAIGYPRGKGLGGCSSINAMIYMRGQIEDYDGWRQRGNTGWGWQDVLPYFLKSEDYAFGANTFHATGGEWRQPNQIRVVSRCGEEQDRAIVGVRSGNWRDCLCWCRGRYSFGLFVRSAGNWIRRHPVWIGGEFEPIATACRLETGFEVRITQNERVRIAILNRALAAEPFGHLFGRATQHGVGRQFKERHHHGYCQD
>c562
MAGDKDLSTPTYDYVVVGAGSSGAALAHRLAQQPDTSVLLLEAGGANHNDFWVRTPLGIGRLLQNPKYVWPFFTEPQEQVNNQKVYWPRGKMPGGSSSINGMIYVRGDPREYDHWRDLGCTGWGYQDLLPYFKKLESAPLGDPAYRGRQGPIRVTSLAEDPQPLGDAFHAGCLEAGIAANPDYNGARYEGVSYLQLSTHQGQRSSTARAYLDRFTPPRLTLQVQAQATSVMWEGTRAVGIRYLHNGQALEVLARREVILSAGPIVSPQLLELSGVGQANRLRELGVAVKADVPGVGENLCDHLQGRITFECTQRISLNEIVSSPIRQAWMGAKYLLTRRGMMATPSATVHALVPAHPDEPRATVKIQMTHLSANSRYTRSPGAGLDPFPGFGIGFFQLRPRSRGHVHAHSPDALKAPLMDPRYLHHPEDQEDMVRAFRMARHVSGQPALQGLIRRETRPGLDVQNDAAVLDYIRQCGQTSWHPIGTCKMGTDDMAVVDPQLRVKGVQALRVIDSSIMPTMPSSNTNAAAIAIGEKGADCILQYPFQVNT
>c563
MAGDNVGSSLWPSTLVPETQLRDDTEFAYLTPNKDRKNLVVIANTTVTAIKWKKHKSHHAGHLDKLVADGVTVVDSTAPSATGAKIKHLRARKEVIISGGAFNSPAILEHSGIGNPAVLEPLGIEVKYANPGVGENLQDHPSSSVILKLKDDHTSLDGLLFNATLAAEQQKLFIQNQTGLLDFAGDAITYVPGEYVLQTLLNKRKGAENVFGQHTHEAHKKLTSAKTSSHDHEVEKYAPVVPRRGALATNAYALRHYAKWPQIEFYLLNAWQAAIPPGKAPAPGAYFSVVTCPQRPLARGSVHINSTDALVKPVVDPRYLSHELDAYTQGYALAFVRKLAQSEPLKGIVESEAWPGTEAVPENASLEQWTDFARNFTGTEYHPSGSLPMLPLHLGGVVSHDLRVYGTLNVRVVDASIFPILPSAHLQSVVAAVAEQAADIVKQHHGYRQH
>c564
MAGDNVRVWTTLCSIKPACATDKSSTNASSPGARAHAASAYDAPVAHRSNLRVVMGARYEKDGEVLTVAAGREVVLAAGSVNSPQLLELSGIGDAAVLEVKVANRCVSEGLQDYFSESCRFVCVRLCVCVCMMVCLGTYLLACGVEVTATIHELDDSGVASDNDKDKDGDRQKTPPPQPTRQTHSNHPNRGPSSPAPPPTSPSRTSSPSTPSATQLQTSNPAPSIPPPAQTEYISSAGNWSPHFTPLPDKKYGTTLTILQLPFSRGSVHIAPTTDAGGAGKAANTVHTPPRVDPRYYVGVGDKVDLDAMAKATAFGARICGTRPLAGLIKRRVWPPEGLPEGLPERLSEGLAEGSSSASSAVSPRDKATNHAWVRQNTLSDWHPAGTCRLGLGPSSDDGVVDPRLRVQGVAGLRVVDASVMPLRISAHLQATVHAIAEKAAVILAEDLGVWGEAVG
>c565
MAGDSSARDGVRGHADFVVIGGGLAGCAVAYHLARDGGADVLLLEQGELNAAASGNNSGSFHAQIPVEPFLNQGEGWARRFAPTLRLMMAGIARWMELPAELDAPELEVSAKGGLMVARRPGELAMLRRKSAIERAEGLEVRLLDRAELLGIAPYLSPDSIGGTFCPIEGKANPLMATFAFARAAERHGARILRRTAATGIARDGDAWLVRTEAGPVRARRVVNCAGAAAGVVAGWLGLDLPVEAHPIQVTVTERVAPLVPHLVYSAADRLSLKQTAQGSVIIGGGWPARLHPLTGLPVVDADSLLPNLRLAIAAVPAVARLRVVRSWAAIVNGTQDWRPILGALPGAEGVFLCFFPWMGFTAGPHVARLVAECALGRRRLDDPEIAGFAPGALA
>c566
MAGELARKGCQVVVIEAGTAGTGEHGRNLDSTPGGTRGFADFLEGALAPLNRAAATPPRLPGLVGIHGVGGMLVGWTHNSPNPDWWELPGWIEHDCWGRLVARASDLLHVGVAISTEDGRYKDFEEIVARRVGALPDGREVQPMPIAAEPLDSGGWRFSAADDLLRGAHENIRLITDHVVRTVVHRRGAATGVLAHPVGGGDPLLINADAVVIAAGTVGSAQLIAASGLEAGPALGAYLTEHTIVASRVLLKANLRRNEESDRFPPSVWIPPSRAHEWSTTINATQWNFNPAIPADAPFDNTIDLLSFCPVEPQESNRLQFDAEREDGFGLPVATGAVELSNSDFDVAGDALRELFLLSSDLGDLVTGWGMRVPARGGSMHLMGSCRMGAVESESSVVSPEGRLWAYENCYVAGNAVLGERNASNPTLTTIAFALHVADAISSPSTSTLVADCKESS
>c567
MAGEQLRWDGQTVVVTGAGGGLGRAYAIFFGSRGANVVVNDLGGSFKGDGRGSTTMAEQVVQEIKKAGGSAVANYDDVVNGDRIIKTAIDSFGRIDVLINNAGILRDISFKNMKDQDWDLIMKVHVEGAYKCAKAAWPYFRKQKYGRVISTASAAGLFGSFGQTNYSAAKLALVGFTETLAKEGLKYNILCNTIAPIAASRMTATVMPKEVLDNLRPDWVVPIVAVLTHQSNTTETGGIFEAGAGHVAKLRWERSKGALLRADDTFTPGALLAKWSDIEDFTNPQHPTGPNDFMELLERAQKLPPNPKAQELDFKGKVAVVTGGGAGLGRAYCLTLAKYGATVVVNDLADPQPVVEEIKKMGGKAVGVKCSAEDGEKVVAAAIDNFGRIDILINNAGILRDKSFHNMDDKMFKQVMDVHLRGTYKATKAAWPYFLKQKYGRVINTTSTSGIYGNFGQANYAAAKCGILGFGRALAREGKKYNIFVNTIAPNAGTAMTATIMPEEMVRAFKPDHVVPVVLIMASDKMPGEPTGRLFESGSGWAGETRWQRSGGAQFPIDVELTPETVKTVWDQKIANFDDGKADHPDDPNAGTEKIMANMSNTSKGGDNSSSSSGETDYNKAIEEAKKAKAEGTEFTYDERDVILYNLGLGSQRTELDLVFEGADNFHVLPTFGVIPQFSAQAPYSLSDIVPNFSMNMLLHGEQYLEIRSFPIPTEATLVASPYLVEVTDKGKAACVVSGSITKDKATGKELFYNESTTFIRGSGGFGGAKNGKDRGAASRTHTPPKRNPDKVVETPTSPDLAAIYRLSGDRNPLHIDPEFAKVGGFNEPILHGLCSFGIAGKAVLQTFGQYKNIKVRFAGTVVPGQTLQTEMWKEGNLVIFQVKVKETGKLAISGAGAELVDGGKAKFVAPDIWNCILEDTVDPMRDRSQPAPIEHQDEQTFDFIIIGGGTAVSVLPARLSHSLPQHSILLLVEAGLYRRSEKLISTPGLSAKLLGNPSYDWNFSTVTSARTVWTGSGVSKREKELELWERLGNEGWGWEGVKGYLRRFQTVREVPAGREGKGLRVVSPPSADGGNDGPIQASLP
>c568
MAGGARRTADAVVVGAGSAGLAVAHALSHDRDVVLLEGGPLAAPSAATRRLTTLPLGGDRARRYAEARGRDVVRGRGLGGSAAVNGGYFLRGHRDDYADWPWPHERIAATFDRLDGGAAGGGTMRVSACRDAELGPVSAGFESHWRTSGIDSARTAPWAGAGLHRVRSNRRAGARWTVADAFPPRADGTTLLRATATALIEARGAIVGVHTTAGRIDAPEIILAAGTLGSGALLAPWTGPLTTLEHPERVVRFAPRTPLSPVPLLQAVLHTDDGLEFRCYSDDFASYIPGVERRGVPIGVADMSRPTRGVLAANGALDLGEPDEESRTRLALGVDDVVAMLRSPAFADLVEPGSIAVDPVIGMSSHTWGTLPLGERTDAGGRVDGLDGVRVVDGSVLPALLRSGPHASILAAASLIAETIRAE
>c569
MAGGASAQVYDYIIAGGGTAGCVLADRLTADGRSRVLLIEAGPWDSNPLYRVPIMGVHLYQWQYNNWNFQTEPEPGLNNRRIIWPRGRVIGGSSSMNGMIYTRGAREDYDCWAQAGLPQWSYDKVLPYFRKLESYEGEASDYRGTEGPIRVSRLDSEHPLFDAFIEAGQQAGLPYNPDFNGAELEGVGRYDTNIAAGQRWSTARAYLQPARGRDNLHVVTGGLVERVLIEGRRATGVEIRRGESVETYRCGGEVILSGGAIGSPVALLHSGIGDPAELAKVGIETRHELKGVGRNLQDHLNFTHFYESLVPDLFFREARFDRAFGLLANAFLRKSGKGAIVPHNAGAFLKSDPAKASPDLQIHYMPAGFNSRKIRWPLQALQGGTPYGFAGHMCHLHPHSRGTISLHSADATRPPRIQGNYATEEADRIALRAGFRELGRIFAQPAYDGIRGKRLVPASDPQTDDEIDDWIAQNASTVFHPVGTCKMGIDPMAVVDERLSVHGMAGLRVVDASIMPTLVSANTHAPTIMIAERAADFILEDRVRPLALAS
>c570
MAGGGTAGTVVAARRSAAGTAGAVVAARLSEDPSVSVCVLEAGPSDVDDPAILELVLVTQLVHRVLARRRIWTSGRRSACPAGRTPGRTQRHQTGRRPTTERASLHDKPPEELKPATASSQRSAWPGPPPRGRPASHRRW
>c571
MAGGLWIAWRLTRRAISTLCPAFLPGEPNPALLATPFENITSQPEDDNLTNIQEYDVVIIGGGTAGCVLASRLSENPNLQVLLIEAGKSDLAILNSRIPACHSRLIASAVDYNLKTVPETNMHNREIRWPQGKILGGCSSINALVYHRGAAADYDEWAEKYGAHGWAWKDLEPYFRKAENFTPSSNWPIDKKGHGRDGPWQISYPSYTSSILPPFISGCNSIGIPIVPDINHGQTGMIGVTRVQTFIDSDGRRSSAATAYLTEDVCRRKNLKISVGMTVTRIITHTAADGKPVARGVELASGPHVPIRYRVKATRDIIVACGAVHTPQLLKLSGIGSESELTRHDIKVVKDLPGVGANLQDHLFIPLTVNSIKGTGVGYTRKPRVPLKWFIRWLLHGSGMLGSNLIQVAAWLRSYDDPEMANKIEDLTSSPYEPDIEIITVVSSARNIGQTRATNHLTDYWSLLQILLRPSSIGSIAVADNNPFTPPVICANYFNTEHDPFKKSCDIVKSSGAFVSWELPKRADELSDDEILEYLKDSANTCYHPCGTAKIGAEDDGGVVDTSLSVYGVPHLRVCDASVMPRIISGHTCAPIIAIAEKLADMLKGEYGTTDKRN
>c572
MAGGSSQSHVQALLGGIRRLAITEGDTFDFIIVGGGTAGLVLANRLTEDANITVAVLEAGACLDTHPRVKTPALYATLLGSDADWNATTEPQEALGGRQLKIPLGRALGGSSAINSQVFAPSSKVNLDTWATLGNEGWDWESLVPYFKRSHTLVLPSDPAVLEHLGLENLDPSRGGSKGPVQVCYPNESENPLPHVWIETLEKLGYVGTGDPFHGDAKGVFTLPATIDAQNRERSYSGSAYLLPVKNKPNLTIIIGAIVQKVLLTGSDPNVIATGVQYLKDSKLITAICKREVIISAGALNSPKILELSGIGNAQLLSEHGIHPVIDNPNIGENLKDHIYTGLSFEVRDGVDTLDDLYRQDPTKIQEVMKAYATDRTGPLTATIYSFAFITLPEDVGEELIRKLDLDAQGSDVNQRCSLGKVLLKSAQPTASLYAYAAQGNFTGAPLKDADLLPNNFYSIDCGLLQPLSTGSTHIRSADPSATPLLDPRYLTHPLDKEIISQHMMLISRIANTTPLKYLLKTRGARNAEAPQDIADPIALKKYVSQTVQSSGHFMGTCAMLPREDGGVVDTRLKVWGTRNLRVVDASIFPIPTTGLPMATVYAVAEKAADIVKEDAAL
>c573
MAGGTGVGTAPTIRDSAVERAQLKVLRSLADAIWPSEPAPDGASDAEARFYATSGAEVAALPEQALLLIQKRLMGYNKGALLLVLYLLSWPLATLLLAGRHALSPSFPWLPRAYPDLPLKQRQAALLAWRHHWIKGLRAAYKAIKSVIVAVVFSSLDAAGANPFFGAVNYPGGAPKMPEPAPSPEALQAEEVLASAVVDARAALAAAGPAGLGRYLERRGLRPAQPSDAARAEAARAGREGGALAAVLSADAVVVGSGAGGGVAAAQLAAAGLRVVVIEKGSWKRMADLTLLESESTQEMFERGAFLTTDDGGMSILAGATMGGGTKINWCASLRTPDHVRREWADRHGLPAFATPAYDSSLDAVLSRLGVQETTRLNGNNGALFDGLCELGADARQLPRNCRSDECSGHCSLGCKTGHKVSTDVSYLADAARHGARILTGARARRVITEAAPAPVRGGARASEVARARVAAGVELVIGGDEDDYSSGTRVVVMAPLVIASAGSIHNPALLLRSGVTCGGNVGAHLRLHPAFGVMGVFDKRQAHCGSDTGTVDMYQGAMMLTYSLSAANWEQGGYGAMVSVPSLHPGLMAACHPWNPLEFKNQLIRMQDIAVSVIFARDRGGGRVTVDGRGRPRVHYWPTPETARSVLEGMELALRAYMAAGAESVTLPHAFGHLVAHRDQGEAGLEAMIADAYATGVEKFDMPLFSAHQMGSCRMGSSPRDSVCDGSGEVWEVSGLFVADASAFPTASGVNPMITAMAIAHMVSSGIAARAAAARKASLLANGGAGAGAGRGGAARGGGGGGKVSITATAAGRDDGGDDVRAARDQAD
>c574
MAGIFFRRDVVNQNGNVIIFTYWWSKVIPVVADLPVGNNFHDHCAAFVPFTLGPGIPTVKQKLTYPQNIQEYIDRRTGPLASAEFISTVAFLNSSPVSPTVDFPDYQLYFAEISNDIPEKRTDLKPEIYKAVFGPYENWPLFACISQHLQPKSRGTVRLKSTNPYDSPAIDPNYFENPEDLKVTVEGMKTCQKIMMLDPMQKVGAKPFETLFPGCEQFFGNEDLYFTCLARGAVITLSHQVGTAKMGDPRDPTTVVDPLLR
>c575
MAGIFLGAVRTVEDVVYRLSPDYLPPFDFIANTFQILTGPQFVVIADLAIRIAIFLLIGTPRQFQLSPSAYETTNLLSTYDYIVVGGGTTGAMVANRLVSNTNGTVLLIEAGEANNYLNIFPYINSLNINDDHFGMNWHLRTTPQPNSHEYTDANMERTSYEGGGKGLGGTSMINWQIYSRGFDTDYDLYESKYGATGWNYESMLAAMKRSAYQNGYDGFEPDASLHSLEKDPNAEQISVSIASQDEIEGIVDSFLEAGAQVTNSKVLEDHNSNQEGFARMQFAVQENGYVGHAGRRFIYPIRNNENDPRNERLHIILRAEAQKIGFSGSRGDIRASSVTVEQDSELRTFMASKEIIVTAGFYGTPTVLLKSGVGPKSELEVMGVDEVLAVEGVGKNLHNHQASMPFPVTFTQGKNFSDLSIKQVVGAFVEGKGRWRSDNSVTAIGFDTVRSDVVESSEDRPNIEYILYYQSAASDSARRVLLNGNGLREEIWEDYYLNTYGGTRFFPNPSVFASATLLHPETRGTVTIRSGETRINYAYLSYPSELEAIALANVKLVRILYTAYAKDGGLLPNKALVGCQEEFDAWVGDADPNDIYQKYQDCISQTGANVDSCLENSVTNEELAYQKCYIQKMTSTTWHMGGTARIGDCSDELAVVDNRCRVCGIPNLRVSDASVLPEPLSGHNIATLYGIAQKCSESIIEDNA
>c576
MAGITRRKFVRNASLLAAAATVGSACSNGSSSNGSAPCAVIIGSGFSGSVAALRLGQAGIHTTVLERGQEWTLQGPDTFPTSMSDRRTTWFGDVDGLTGLSPVTRYAGMLERVRGDTLDAVAAACVGGGSLTYGGVLLQPRRDIFEGVFPTISYDDMDQIYYPRVLAGIGASAIPDDVLASDPYAAHRAFLEDCASAGFETIRPAASFDWDIIRRELRGELPPAVLASNYLFGCNSGAKLSTDKSYLREAIETGYVELRSLCEVAMISELDNGYKVTYRNINPEGELLEQVEINADYLFMAAGSLNTSKLLLSGQQAGELHGANDRIGKGWGTNGDELMMELRKDPLPGPQAGPACISAVDRGSPGYPVVYEHSPAAVSGIQIQLAMSVPDKLGELAFDRNDAFGIHWPDDSATPSAQARDDSFARLVSTTGGLDISGAIARTIWHPLGGTVMGDACDNLGQLYGYRNLFVIDSSLLPGSAANANPALTVAANAERIMEALVPNLR
>c577
MAGKATVSFFTILCAIGASAQQTCKLTPLDADWPSEADWSALNTTLGGSLIKTQPVASSCYPGNPFHSSQPCEIVKKEWGYSYYHASLPESIGSPLYANNSCLPPGAPGYTPTKGCEVGGAPQYVVNATTEEQVATAMAWASERNIRIIIKGTGHDLNGRSSGAYSLSIWTHNFKNLDFDAGWRSPSDNRTEAAIILGSGHDWGSASRGAAKFGRVLVGGVDETVGVGGHIQGGGHGPLSSTFGLGADQILQVRVVTTQGQILVANEAQNQDLLWAIRGGGAGQYGVVTEYVLKAHPNPGNVVSCAIEVSAAGNDIAAKEAAWRGFAVLLASVPDLMDAGLTGTGMGLASTLQNASVSNPIRKASISINFFTYNTTEEKVASLLEPVRDRILAEVGNSTVTVNLSKPSTQPDFMTFFESVNEAPSGAGTAGLMTSRLLGRKELSDIPISTLASYLQRIMVTQDPTSTSLMVIGLQGGLGPRNVPEVMRGALNPAWRSAYVHMMSYGASIDSSLSPQEALDGAAQWLEETMEPVWREWAPGSGAYMNEGNAFDCMFKEDFYGASYDRLVEIKRKYDPAESLFVLSGVGSDAWDYDLNSAADLYLVILNQSLACAVHSPTSCSIAISCAWSVPRVVSVPSFLLVTSLFVPTVVTLESLIVSAGSVIAVIVVSPQATSSFIPIPVQGHFSIVSFFSPPVFPSPPFMSLLAVLLFPQLLQFPLSLRFELLALLLDFAHPGSTHFHHRGTAGCIVVTRLADADPNLSALVIDHLLPGAKTTLTYKSKKSESLADKEVAVPSGGVLGGGSAVNMMMYSRA
>c578
MAGKIPATADYIILGGGIAGCVLASRLKEADSSLSIVLIEAGPDPTGHPLTTAPLACFAAHYSDLDYAYRTVPQEHLGGRPCYAAAAKVLSGGSAINYGAWTRGPAADFDCWADQVGDSGWSYRGLLPYFKKTEEYTLSPRVDPEQHGANGPIHVVSVSDSDPNRKYPLRQPVEQAWLELGVERVWDANGGEPLGLTEVVESWRDGKRQCASQAYNLSDVTVLCSTVAHRVIIEHVSGVKTATAVELVDGQTIAAAREIILSCGTYRTPQVLMLSGIGAKADVIRHNIPLTVDSPEVGRNFHDHLAVCLWWKLRHPEQGLALGTPEWKDAAYSKGLPADWMAFSRVPNEILSQSLIADAESTDGHDLLKPGRCHLETLVAYAPAGAHLADVAMPLDGTHVTTAVLGMTPTSRGTVTITSNDAQTPPQIDPNYYATEADRQALRYGIRQALRLLQETRAGSSIVENEVAPDGYPGLDADSTDAEIDARVRRVGNTFYHAGGSASMGKVVDSRLRVYGVDRLRVVDASVIPIPIAAHYQAVVYAIAEKAADLILHPTK
>c579
MAGKNISAADFAAKSYDYVIVGGGTAGLVVAARLSENPAISVGVIESGIDRSDDILIRAPLLHTELYEKPEYDWLYKTVPQGKNGKVHAWPRGKVLGGSSTINFSMLAKPSKGCIDNWAALGNPGWDWEGMLPYYRKFMTLNPPPVDTAKHLDTTRMQKWIGNGNGPIQASWPPLEYLNTQQQIGPDLGTALGLRDPSADIGASTGYYDQALSVDMKKGRRSSAVYEYYHPNAQRNNLSLIMDAMAQRIVFSVNDANGDNVASGVEFLVDGKKYSVGAKKEVILCAGTIGSPQLLELSGIGDKSILEKYGINCLVDNPNVGENLQDHLMSGIAYEVVPGVATIEDLKKTGIMEMLIGEYVKAPIGLLVNQMTSSIFSSYSDVVEDKSKLKEKVEAIVPSSQTSNDSAKAKAMKIHKDRLLDPEACSVWFITLPGGTDLRNASHGSGIFEHKDPGNYLSMAVGLSHPMSRGCTHIQSADANVKPLMDPRYLSHPADIALLADGLRYLDSKLIHVEPLASKVKDGPNGTKKKMPSYETFHPEKAEEHVQNYLSTQWHIMSSCSMLPKEDGGVVDHNLKVYGTSNLRVVDASIIPMEVQANIQTSVYAVAEKAADLIKASQ
>c580
MAGKPVARSNGRMQFFANDYPSFLRSFQPWVSLRADLPDGSGPERTFTPGQLETLAALAEVLIEPGGAVPAVGGETLERLDAYLANITPLIRSGLRAALRGLDAAARARHGRRAAALPPAQRRALIEDARRGKALRHAVEAIETPLRIAHFGDRRYLDAVGAPRYDEPVLEQKPGWLVNVTTPGELSRHEVIDCDVVVVGTGAGGAAVAARLTERGLGVVMVEEGGYAGRAEFRGDLGERTQKYWRDGGYNLAVGNSVLGVSTGRLVGGTTAINSGTAFRTPDAVLREWQELGFPGDFTPQAFAPYLEEVAAELGITTADPRYLGRVAGIIGAGADAMGAAHGPLPRNAVGCDGQGQCVYGCPTEAKRSSNVSWVPRALKGGAQLYTRLTVTRILLSGGRATGVLAEGQDEHGAPRTAEIRARAVVVAAGALMTPLLLRRNGITLPALGRNLSVHPSLGAIAMMPTPGAPWTGIPQGYQVEGLGDDLVTFEGVAIPPQFAAGVLPFHGARLTEWMNDWTRTEQFGAMVRDTGTGSVHHGPGGRTLIRYHLTPRMQAALQHACAGLAELFLRGGAEAVALPIAGTPPVRTLDQARTVASIRLHPRGFRLMGPHPLGTARMGRDARDAVVDFGHRVFGTTGLYVADGSVVPTSLGVNPQVTIMAFALRAADLIAADLN
>c581
MAGLDDLLTEAERLLAVTSSALADAPLADLVRKRLAEEFDDGRAPDRRVRPMPLAVRRTASGELIWSGSDVVFGEVTRRNANFRLLDESLVTRVLVQDGAVRGVRVRDLRSGHEHVVGARFTVVAADSLRTPQVLHASGVRPPPWAATSTTSRRSSTPPASATPRRSRPPRRRTAPSPRGAG
>c582
MAGLFLAQQLCALGIRVVVVESGRKLSDGDAAELNEICDDYGRYKWPVTGRMRGPGGSSAVWGGKMIPLTPGDLEERAHLQVPKWPISHSELLEGLCDVEAFFRLDRGSYENDSPQHSRTGYEFPRHDRDFSVRWAKWAGFRRGNVWTILKTQLHRLPNLDLWLDATVCGFMADTLAGRVSTAICRDQSDTKLAVSARHFVVAAGTIESTRLLLLLDEMHDDRIFQGCNALGHYFQDHLDAQVGRLVPIDASAVNKLFGTRYFRLHRRSPHLELTHAAQRAEGVASAFVHVTSDVSQNPTLASIKQIARALETQDYRALPAKIRHSEINPRLLGEFLIWRGWRHTLLVPGDVDLNLRVCIEQSPRWDNWIKLAQERDRLGARKVALKWLPSEADERTFRVSIDRFANFWRRNGFDNICRIDWAEATRGGSASSILDIAQDYAHPSGTTRMGLSRAEAVVGPDLVCHLVPNLSVVSASCFPSAGSSNPTLTIMLLACRATRAIARSVQTSLAMASAPAIKMSGAANV
>c583
MAGLGSAIGFPLALALLVSLLLLRKEKHKHSPPKLMYKLPDNHTEFSFRPPPPLRTQSAMSLGSYHSDRPHSRRDSTGTTATANSKPIHLQSFPERYEQLKRAKVSEFAVERHELDGTLPTYGIVGGGPSGLTVANRLSEDPSVTVLLLEAGPADTGEDIVMIPGFIGHDIGGQYDWNLSTVAQTFLDGNARSVPSGRALGGGTLLNGMLWSRGGREDYEDWVRLGNPGWGWEDMLPYFMKSETFTPMQGPQVAEEYSVREDQSVHGYAGPVNVSYPNYQWNSSISLFAGLAELDIPIAYDPNAGDVAGASFLPFDLDPVTQTRHTARRSYYDSIANRPNLWVVTGQTVTQILFNGAQGNVDASTAAPSDMSVGQGSSPGTAGIFGDGSMLNVSSLPPSPSGCSAAGPPMTLVWRSITTRIWHMVKRFLAKTRRQNIPSGPSLTATGVEFAPNAQSQRQSLQATREVILAAGAIHTPQLLMLSGIGSAPALQSLGMTPLLDLPGVGQNLQDHMQVWCWYPYHNPYTSNPTELNTNQTFVDEAWHDYWSSRTGPFTSGAIDGVAFPSLPHINPIAAAEMNSLASSQDPRAFLPPTTHPSILAGFSAQLSLLATALSDPRRAAYELINANDGDLTVASMRPLSRGSVTLAASLSFTPPLIDPRYGSNPLDLQVLREAIRFNARLIDTTAMAELAPEQVYPPVGATDEEIEGELGGVVDAELRVYGISNLRVVDTGIFPLVPAAHLQAVVYGVAEKAADIIKAAWTSSRIAPAPFESSSAADGVATVDPIVVSTASDTGTASDMADAATATSEFSQVLFTANLATTEAPIATPKPITDVVVVTTWVTVCT
>c584
MAGLQYLSGFGNEFTSEDPRCPGCLPKGQNSPQQCPYGLYAEQLSGAAFTAPRKENQRSWLYRIRPSVLHQPFTVEEKGLLTHDWNSVQPNPNQLRWKPFNIPNVDEEKVDFVQGLATICGAGDPKARHGLAIYIYTCNIPMGEKCFYSSDGDFLIVPQQRGLFITTEFGRMQVDPNEICVIQRGIRFNISVDGPSRGYVLEVFDGHFELPNLGPIGANGLANPKDFLTPCAWYEDRDVTGYTVISKYHGHLFSCKQNHSPFDVVGWHGNYAPYKYDLSKFMVINCVAFDHADPSIFTVLTCPSLRAGTAIADFVIFPPRWSVQEKTFRPPYYHRNCMSEFMGLIKGTYEAKEGGFQPGGGSLHSIMTPHGPDAECFEKASKAELKPEKIAVGTMAFMFESSLSMAVTEWANTSSIDPDYYQCWQPLKKHFDPNWKPTENSCTMYSFKSYSACIVALGAFLVSVSFYLRPSPLTETFDDEYDYIIGYHQMGGELKVARTKTHSLPNFIIRAGKELGYDVVDANGEKMLGFVEPQSTLYRGTRMSTSRAFLHPRIGQENLHVGVNALVSKIPVIADLPVGQNLQDHPRIDIAISINTSITLTLDKLQSMWEAVKYFSVGKGVLSSTYGIETIAFLSTKPDLQKLGWPNLEVHFCDILPGKEHMVNSGYSEKSLEEISSRDGKDGFLCMPTLLQPASRGSITLRSKNPEDHPLIDPNYLEKSEDVEVLLEVRGIMGLRVADASIMPTIVSGNTNAPTIMIAEKAADLIKGRNFVQPRESTTS
>c585
MAGLTLAHSLALKGIRVLLLESGDTVVDGEAEILNRIDNVNGRWTGALRSRCRGIGGTSRRWGGRTIPIALEEARARPHLDSEGWPFPISELDRYTAEIETLLLLDHSSYEADLYGQTDIDPDFRIRWAKWPAFSNLNLAKRLHRQVISNRHVTIWSNATVTGFAFAAADGRLDKVTARHCSGREITVRAQRFVIAAGAVESTRLLLWMQRQPGQGLLGSKALGRYFQDHLNLKSAKVVRHHVGESNKLLGYRFANSVRRSLHLELSPQTQAECGVASAFAYVSMDMDGSALGSIKKIARNLQQGQMDTTELLALSGHSSLIFQSLVWRYMRKRLLVPASVDFNVEICAEQAPHWDNAITLSKDKDRHGIPLASIDWEPKAEDEKTLRVSVERLAQFWSRSGWDKVASLAFLPSITDSCSRLVDTSIDYYHPSGTTRMGWDKASSTVSGDLTCHDVSNLSVLSASVFPRAGSANPTFTLMRMAHRLGDYLATKF
>c586
MAGLWIVGEDMPRAENRVTLHKDEKEAHGMPIADVHFDDHPNDTAMRNHAYKQATALYDAVGATRSFPTPPYPSTHNLGTNRMSEKAEDGVVNKHGQAHDIKNLFVSDGSQFTTGAAENPTLTIVSLAIRQAEYIASQIRKILRHPPVAGRRALVRPGELAEGTPLVIDEILVFVTRAGLEDDDIDAFLGEFVAERAAAGAGADDHDHAVVVEIK
>c587
MAGLWQDWTVGSVAERTVVVGAGVAGCAIAGRLARTGEVIVLDAGPRVVAEDVPVDVHRALATPELTHRDLAVRRVADGPLVAYPAGRGVGGGALV
>c588
MAGNRFENDIAELSLQSRERPFDAIVVGAGSAGLTFARTLYEEGVRVLLLEAGPLPFLGHINNTDMRFSRQLSRELRDTLAYRQNLDGGGHFGPNYSCLGGRGLFWNGASPRYSPGDFAHWPSTGVPTEADYLWAEHQFHVSAGMGETAMAQNIIVRLKQATYAAEPGPFSADISGLYPGRLSAGIGSGLGLFLRACGDALVKSEITVTINTRVDELLIEGGAVRGVLAFQDRNSRSPVELLGRSVVLCGGGLESVKLAAVSKVPDPNKRIGRGIQEHLFYTASLNAHALYDRDTPSSAIVYVRAPSQVEHQWELHAPGNRLFAIDDGSIWAPASSPPYEIMIRAFAATEKRDDNALEARRGPLGSSTIHFTLSLADQLRKDQILADAVRFARALGAAPSASPALESVERFRPVGSSYHEAGGLDMGLELTTSVTMPDGRFHHLDNLVSGDAASFPRIGATNPHLTIVALARRKATLLAQRLTA
>c589
MAGPLRGDRAVYDRVEERIGVSSTVQAVGAFPRNKGLAPFTPKACEGIGRGLKVIPIPKAVLTADHHGRPACHYCGPCWQGCDSGSKFDSLRVFVLAAQNTGRLHLIPNARVRHLEAGPDGQLKTVHYFGTEKRAWQELRAKAFVLCPGAIESAHILLNSKMANSSGLVGRYLSEHLYASVSAHLPQLMGRKIANEDGSGLYSFIPDCTKNWRGTKFIRGYQIFPMGGAGEFTLVGNQIPGNGTDWMEAIRNYSTAGVSLMFQGEVLRYRDNRIELDPVLKDDAGIPAPTYFYEWHGNERAMFKDMIEVGNEILHKAGAEMLPNRNPHEYGHSIHDVGTARMGKDPRNSVTNPWNQSHDVPNLFVNDGAPFVTAGNQNPTLTILAFALRSSERMVRLMQNNTWTD
>c590
MAGQDITTDRLIVGSGPVGATYARKIMDLSANSQKKPKITMVTLEDEYTTSLKVALTCAAPEPHQVELPDKYRPEDWDKLMKEAKELINVNNTAFDETSLRQAIVKETSEKSFAGRQIESLPLACKKNATDSSVSWSSVSTILGDLIDPKSSTSQNFELLYSQLCTKLVFQDPSNKDNNQISHAIIKDLVQGKERKITARYYVICGGGIRNPQLLFSSGCEQSGSSERLPALGRYLSSRIQTLCQVILTKDLTDTVPRANSEVWQGLINEHKRKYPEDVIEIPKGDPDPQVALPFSQKKPWYTEIHRDAASAIPEEKLPFAMFGSNPVSGGKPSNAIDQRVVVHLQSFGYSTPNAANHLKFRTDITDMWGMPMGTTRVGTTKDDSCVNANSCVHNSTNLYIGGNSVIPTCIAGNPMLTTIAYAIKGASALYKKMAN
>c591
MAGQVARQAFTPTQWRTFMAIADTIFPAHTPEQVKEILTALPQGQGNKAAIEQFLARSASDCREFADALDEVFAHKIPSDAVVKIRMVLDLLDGGIFTFLLTRSFTGFSRLPLSTRTTILQNWSQSWLGTLRILHRQLQLIYCNTMLKANPLLISALEYPEFPPAYTPQENDPLHPSCATPAPPFHKPNFQVLEDTSSSGNDQDVIELESDIVVVGSGAGGGVCAARLAQELCPLGITVTVLEKAGFFSPENMPLPQIPLAQISHDNSGAISTRDGQGLCVAGTTWGGGTTINWGISLELEPPITQEWSSKYGLKGVLEGRDYQDCQKHVRERMGVTAPEERHFNKANRVIWEGARKVGLDPIPLPQNCGGRMEEHVKCSHCSSGCRSGCKQGTANSFLVDAEKAGAKCISGVEITNIIWSPESIAEKICAGVEGWIVTPPSVNLSSSTSPAKAKRKFRLLSPRVVLSTGALRTPTILQSSSLTNPSIGKNLRVHPCLLVYGLTSSDKPMDPWDGTPTTVLVPTTNDKSLPMKSKLMRMDPPPSMALTCLPWYDATEYLKSVLSYKHSITLLTLVRDTDSSGEVAKGGTKTASGEVGPPDIGYTFSAKDRATAIDGIILSCKVLLEGGCKSVVPCIPLPPHLARFTAQDGVDSPTATNEFGKWAEAVRRYGCGMGWVSAHLMGTARWGGKAGDGSVCDGENGGRVWGTKGVYVVDGSAFPTASGVNPMLTIMGLAEWAGRRIVEEVKGEMDVRA
>c592
MAGRRTPRRHPGPDAGPASDRVRAADLRGPRRDLFEPRASGQAVALGGLALRRRRHAAPAGGRSEEVPGPGVLRPTRSVARHRLQRALVPRDAEVIRHCDEQPPPPSTRVEVAIVGSGCAGGTAAWVLAEAGKQVLVLEEGPDKSGAQFTQRDSEMYDQLYMDRGGRMTTDLSVSILQGRVLGGGGVINASDVVPIEDPVLELWQRRFGLSEWTAAALDAPRLRALEDLSANPIPEAMLNRNNQLLRQGAERIGASGHVMRHNRVGCAGMGTCLIGCPVSAKRNPRQVAIPAALSAGAEVWTRARVVRIVDGTPKRLIVRLLDAKGYRETGEVEVVADTVVLAANAIGSAALLSRSGLGNHHVGQHVSLQPQLPLLAEFDEPVVGFRGIPQAYAIDEGEHFDDTLGLWGYRIETIMGTPGIVASLLPYAGLAAKQAMTQYPRLAAALLLTPDEPTGRVEVTSSGRIQVDYELHANVVDRYRQAVKLAARAYLAAGARRVMVPSLPPVLFESEADLARIDAFPFRPAQAPLLSAHQQGGVRAGPSQSSAAADPTGQIFGSRGIYCWDSGLYPTSSSSHTMAPILATSRWLAERWLSQPLTP
>c593
MAGRSGATGWSWEDVLPYFRRLECDLDFSGEFHGKDGPLPIKRVRQSDWSGFIRAISHAYDALGLHFRPDFNGGFGDGYSVVPLTNRNGRRVSSAMAYLTESVRSRRNLTILPETTVMWIADASVMPFCPRANTNIPTVVVAEKLADTV
>c594
MAGRTAADSMESFDFVIVGGGNAGCVLAERLSAGGRHSVLLLEAGGRDSGFWIPIPAGFSKLLVNDVYNWRFATEPEDGVKGRSIAIPRGKGLGGSTLINGMIYVRGQPQDYDTWAQMGCTGWAFDDVLPYFRKLEAFDGAADETRGRDGPLAVTTVTERPALAEAFIAAAGEAGFPRNRDYNGRDQEGFGYYQVNQRNGRRVSAADAYLRPARGRPNLAVRTHAHVLSVDFDGRRATGVTYRSGGRDVSVKARGEVILAAGAVQTPQLLELSGVGDPTVLTGLGLPVRHALAGVGANYMDHFCTRMNWRVKQKVTLNEATRGYRLALAVAQYFLTRKGILTLGTGLAHGFVRTRPELAGPDIQYFFMHASYANAAERRLDREPGMTIGVTQLRPESRGSIHARSPDPLAPPVIRPNFLAAQVDRDCMVEGMRIARRIVEQPAMDAFRAHEMSPGPDCRNYDDWLDFARSNGQTIYHACGTCRMGTDEQAVVDPRLRVRGLQGLRVVDASIMPTIVSANTQAAVFMIAEKGADLILADAAQHWDVGSGFSTPAMVSRIPAGPTEENAGHGRGA
>c595
MAGSGYDYIIVGAGSAGCTLAYRLAIDPSVRVLVLEAGRPDTHFLIHMPAGVVSMAGSGRYDWGYWTEPQAHCKDRRMYWPRGKTLGGSSSINAMLYVRGHAWDYDHWRQLGNPGWSYADVLPYFIKAQHNERGASEHHGAGGPLNVADQVSPAPINNAFVEACVQAGHRRNADFNGAVQDGVGFFQVTQKGGKRWSAAQAYLRPALARGNVTVLTQAHVARVIIENGRATGVAYRKDGKDTVAHAAREVVLSGGAVNSPQLLMLSGVGPADHLKAHGIAVVADVPGVGANLQDHLDAATLYYCTTRDTYDTASKLATFARYVFAKTGPGTSCIAESGGFLRTGEGLAAPDIQLHFIPAFVIDHGRTRMKRNGMTLHVCLLRPESRGSIRLKSADPMADAAIDANYLAEPRDLQGLVRGTRIAREIFAQAALAPFRGSELEPGAGKQSDADLADWVRARCETIYHPVGSCRMGPETDSSAVVDTALRVRGVAGLRVVDASIMPTLVGGNTNAPTIMIAERAADLMLGEAVPARQAA
>c596
MAGSQTIETDVLIVGSGPIGATYARKLVESGLEVKMVEAGAQKNTRASQKDTDSSGIQGGFPLTSVPTNSPFGNDSAPFSFPSKTQMINGPDAGPKVSENAASRNVGGSSTRWACATARPNIEARSDMYTPDEWNELLKEAEGYIGTSLPGPSYVLKDSIRQHLLLDHLSGVLPDRDPQALPIAAKIDPKDSKLLLWSSAYTVLERILEDKELNKRFELLPEHLCTKLEIDSADKRIQYATVKDLVNNKTIHVKAKAFVICGGSVQTPQLLYASGFRPEQAPGKQLLPALGHFLTANPRTFCQVVLRKDLINKVEQNEAWKEKVKAHKENTGDPLPIPFHDFDPQITLKVDKTKSWHVQIHGDDISSSSAPTGVDKRVTVDLRCFGPMEPQKDNRVTFQEDLTDMYGMPYPIFHQLETSENDRSISHQMMEDMIEVAGKLGAYLPSAEPRFLPPEPALYACGTTRAGKSTESTKTGEVPEDSCCDESCKVWGLDNLYLGGPNVIPGATPANPILTAMCFAIKSANAIIESLRHS
>c597
MAGSRERSFDFIVVGAGNSGAVVAGNLARAIPGPSVLLVERGGDNQDPELRVASERFTNVYINDAVKLRYETVPQKNLNNRSLEYLRGQGLGGSSMANFCGYIRGSRSDYDTWAEMVDDDAFKWKNVVQRYCELENLHFTPDDDPDGFVRLRDGVHGFEGPVDLSLAARQEWPTGLDKVMKASLQFGWPLNQDQNSGDLIGVGSISTTTYKGYRVTSASAYLSNPPANLTIWTHALATKLLFEKYGNSSKPKAIGVELADGRKPRAKNEVILALGTIDTPKLLMLSGIGPKEDLRQLGIPSLVNLPRLGKDMIDHNYVIVSWGANTELGTSVDRVRNAELVETARKQWRKDRSGQDAWLNLSNLLAFVKYDPKRSPKTFEELEKLDERTKKWIKHPQTPQIELFLQGTVPEEFDTKNGPECFMLGIMSMQPQSRGTVRLASKDPLEMPLIDPNYFDHPYDSRMMIEGVREGFNLIKSTDLSKYIVGPNLTPASDSDEDILKFLKTYLMPILHPVGTVRMGSSNDHSACLDTDFRIRGVDGLRVMDLSVCPLITSNHTQATAYVVGQLGWKQLQKEYGLKMTPPQQKL
>c598
MAGSSSADVVVVGSGVAGSLVAYRLAKAGASVILLEAGPRLARWQIVDNFRRVADKRDPCAPYPLLPHAPRPEPMNPGAYLVDRGASPYQPQYLRLVGGTTWHWAGAAWRLLPADFRLKTLYGVGRDWPFPYETLEPWYGQAEVELGVAGPDVDLGSPRSTPYPMDALPLSWMDRRVAEVLGAQSLRVVPEPTARNSRPYDARPACCGNNNCMPICPIGALYQAATHADKAERAGATLIAQALAYRVEANDRGDIVAIHYKDPNGLSTRVTGRRFVIAANGIETPKLLLMSGSARYPKGIANGSDQLGRNLMDHPGVSVSFLANEALWPGRGPVEMSSIVDFRDGPFRAQQSAKKMHLSNVAPTLAVTRNLLDKGLTGGELDRQIREQCARRLTFGSFHEQLPSSANRVMLSAQKDALGLPRPEIVYAVDDYVRRSAADTRAQFGRIAGMFEGTDIEYDDSLGSSSHIMGTAIMGRDSSDAVVDAECRAHDHANLFIAGSAVMPAGGSVNCTLTIAALSLRLAGTIEASLR
>c599
MAGTDYDYIIIGAGSAGCTLAYRLGADPSVTVLVLEAGKPDTHFFIHMPAGVVNMAGKGLFNWGYWTEPQAHCNGRKMYWPRGKTLGGSSSINAMLYIRGHAWDYDHWRQLGNAGWSYADVLPYFIKAQHNERGASEFHGVDGPLNVADQVSPARINTAFVEASLQAGHKRATDFNGLMQDGIGFYQVTQKGGKRWSAAQAYLRPAMARGNVTVLTEARTARVVIENGRATGVAYRKDGQDHIAHATREVVLSGGAVNSPQLLMLSGVGPADHLRQHGIAVAADVPGVGGNLQDHLDAATLYHCTTRDTYDTSNKLMTLAKYVFSKSGPGTSCIAESGGFLRTGEGLAAPDVQLHFIPAFVIDHGRTKMTTNGMTLHVCQLRPESRGTIRLKSADPLADAAIDANYLAEPKDLDVLVKGTRLAREIFAQAAMTPYRGAELEPGAGKVSDADLATWVRARCETIYHPVGSCKMGPSSDATAVVDSELRVRGVERLRVVDASIMPTLVGGNTNAPTIMIAERAADLMLGAAAPAREAA
>c600
MAGTHSIPSDIDILICGGGTAGAALAGIIARDTDLQVVLLEAGPDYGPLATGQWPADALNAIEICRSHQWAYYGIAHPSHTQPTGYDRARIIGGCSSHNGCVALSGARADYDAWPGLGAPGWDWASVTPAFERAKRQLRVRSVADNEITPWQRVFVDGCIAHGIPWTDDLDNPDENVGVGASPVNIVDGMRWNTALAYIDPVRERPNLRVVGDCLVDRVVMENGRAVAVDALIDDTSVRIAARRIVLSAGAYGSPAVLLRSGIGPTDEMKRLGIAVTHPLAGVGQALADHP
>c601
MAGVDRPARGHDVIVVGAGSAGCTLAARLSEDPARRVLMLEAGSDDGDLRRASSPLADASRLPPFDGARMSTALTHLPTVMVADRIAGWMARGSGVGRRHDARQALCRTVSTTILVLCANGPGSTGGAPTRVEG
>c602
MAGVLVRDDNNGRLSLTTTNRASLTYRIGEKESKIIAKGVEILAKMWFELGAKQVICSHRKKPLIKHEDQIKDLKELILSDPSNLLLGAAHPQSGNKIGAEPDKSVVDSNCKVHGFKNLFVCDASVFPTALGVNPQVTVMTVASIIAERIAKNWEKYGKIPIRKSLGETCDISQPMYCLRNNLSDMFDKMETKYGVQMLVNTASETLNETNWNFNPTTLMITNNTHWKGLYPRDSDIPNELTHYAGGFWKRFTKTGSQISGITHPFEAPVFAANKAIDKNLPGFGKVIVLEYIDFPYNGFYDVLKIVDDHTILGKAFMGTPEPGKEMLTFSMSRKYPFEFMTEDDHEMLYSKMKKPTLDLMVGVWDGYLISDSAWTPSTFRLRFYMENGVLKDDYIFGNRFSGAAQVIDKSDHIEMHDVTGSFHDEIRKINENILIGKYYAPASELLKYIPGGISFFHADQFKSRSYLPYVLKRIGEDSAFRGYTTDANK
>c603
MAGVSQQMNLYSLTRMALTLGPGLGFLLYLHSATLNQRPDILDRDNRIRDTVYTEIKDNYDFIIIGGGSAGSVLANRLSENPFWSVLLIEAGPDEISVTDMPMMFPALQLTPFDWKYKTEPGDKYCQAMVNEQCNWPRGKVLGGCSVLNAMLYVRGNRRDYDRWADIGNPGWSFDEVLPYFKKSEDMTIDEYREDPYHGTGGYLTVEKFRYRSPLSEWWLDAVREAGYDIRDINGEYQTGFSLSHGTLRDGLRCSTAKAFLRSVSDRPNLDVSLHSHVHKVLLNDNNQAYGVKFTKFGLEKTVYNDREVILSAGALASPHLLMLSGIGPKEHLEEVGIDPLIHSPGVGMNLQDHVAMGGASYLFDPGEYYADKTCSFSLPKVFSTETVNDFANNKSGPVYWLPVCESNLHITVHFPLGGEELKNHKMFWLGAKIMSGITAEILELGAATSSNLGIIIPALVAAMAYFQYELLDPEARPIDVPTDQLLDKYDFIVVGAGSAGAVVANRLSEIEQWKVLLLEAGGDETEISDVPLMAGYLQLSQLDWQYKSEPQGQACLGMNNGRCNWPRGKVIGGSSVLNYMLYLRGNKKDYDIWESLGNPGWGSKDALYYFKKSEDNQNPYLAKTHFHSKGGYLTVSEPPFRTPLVAAFIEGGKQLGYKNRDINGQYQTGFMMAQGTVRHGSRCSTGKGFLRPIRLRPNLHVAMKSHVTRVLIDPISKVAFGVEFIRDGKLHRVRATKEVILSAGAVNSPQLLMLSGVGPSSDLALLKIPVIQDLKVGHNLQDHIALGGLVFTINKPDSILLDRIYSVGSLMQYAVWGKGPLTIMGGVEGLAFVNTKYANASDDFPDIEFHFVSGGPHSDKGAQIKKAHGLSDEFYNSVFKPIEGQDAWGVIPMLLRPRSKGFIKLRSKKPTDYPLIYPNYFDDEFDMKTLIEGVRIGVALSQTPAFQNYQSTFVKYPPCEHLTRHSDDYYECMIRLYSATIYHPVGTAKMGPIWDKDAVVDPQLRVYGIKNLRVIDASIMPNQVSGNTNAPVIMIGEKGADLVKEFWLKAAKLSRIYKTLEGI
>c604
MAGVSVLIVAAVVVAVLLSKGEASSGSDSDAQFSDFVVVGAGTAGCALAAKLCSALPNHHITLLERGAPRSDESEFLVEAPRNLFPLWSDRNVTQAYPSEPDEGIQNRSTTVLAGTTAGGSSAINGMQWTVPLPGSVEQWRINGLTTRSASSFYQRAYQTVEFDEPKFPLQYADDYIRAAVRAGFPQSTNPFVQPDRAVWQNRLAIDGTFRRSDSCSAYLKPVMNSVCARNLQLVLSQTASRILFERSGEDGGRLKAVGVQTLDTFSPNITRSFYARRNVVLSAGPYESAHLLQLSGVGPKSVLDAANISQILELPVGQTCVSRASASVASRYTGVRDEPANNMTLVNSQAERDRFETGRGGILATPVSAANGRVGGDGYFGAGFVPFFPGPREFRTQCFHNGRTLASVTTVSDDPFDTPKVKLNLLANDNEVGQLVSCLQQVLDIHRALPPEFNATVTEPVGGVVTEAYVRETANTGAHFVGCCAVDDVVDGDLNVLRVDGLKVVDASVIREMPKSAGPAASVYMIAEFMAERMSSEVLAEERTMRW
>c605
MAGVVSRCVCRVSVPVPEQPTRSALGGSAMLFDAEAADRAAFDRLFDVCVVGAGPAGITLARSLAAQGFTVALMEAGGFDYDPVSQDVYAGECGGHDYFPLDECRLRFFGGTSGHWDGKCRPLAARDFLPHKTNPMSGWAIRKADLDPYLTPAARILDLDDPIVPPDLPLTQTEDRFRHVQWHYSAPTRFGEKYRDEIVASDRISLCLNANLVDLTLGDDQSRVVGAWFRNYDPDDRGFAVRARSYALCLGGIENARMLLNFRSQRPNGIGNHHDLVGRYFCEHPTVFAADMLLTETWPFEQQVFAPTEDLLDRAQVSSFAVFVEPQRRETPLDLPKALKTTAECLTPEVSQLVQRLRGYRPRCGWGGLEEFALVRHPKENPWAKVAVSVEQRLNAESRVHLAEGADQFGLKRIRICWNLKDKDYDTFRAAVTAFGAHVAEQNVGRLRLRPWIRAEEPMLPSPGGTDGQVAGRHHMGTTRMCNNARTGVVNADCRLHEVDNLYLGGSSVFSTGGYTKPTLTIVQLALRLGDHMGETLRAA
>c606
MAGYDYVVIGGGSAGCTLAARLSEDPAASVCLLEAGGANKEMLVRMPAGVGTLIKAKGKHNWGFWTEPEPHLDKRRLWWPRGRGLGGSSAINGMIYMRGHPQDYDEWRQFGLAGWSWDDVLPYFRRLEGHHRGPSDGLHGADGPLKISAGESDSPFHDALVEAGRQAGYPVTTDFNGAVMEGFGHYDLTIADGRRWSAAAAYLHPALGRANLTVITNARTTRVVIEHGRAIAVDYLVGNRPARVEVAGEALLCAGAVQSPQILQLSGVGDPARLRDSGVRAVHDLPGVGENLQDHLDVIMNWRCHGLTTAYSATKGLRQLKVGLEYLLRGSGYGRQQFLESGAFLCSRAGLSRPDVQIHGVLAIMRDHGKVQVKQDGFSFHLCQLRPESRGRVTIASNDPLADPLIFANYLSQPEDVRVMRECVKIGREVAAQAALDPYRDAELAPGAEVRSDAEIDAWVRRTAETIYHPVGTCKMGADGDRMAVVDAQLKVRGLERLRVVDASVMPTLVGSNTNAPTIMIAEKAADMIRAA
>c607
MAHDCFDYVVIGAGSAGSVVAGRLAEAGKGTVCVLEAGGRDWHPAIHVPAAVVYALGNPRLDWMYRTAAGSGIAGRSILQSRGKVFGGTGAINGHVCTRGHRSDFDDWAEQGNPGWTYAEVLPYFQRLEGRIGPGDARYRGRTGPFTITDIDAPDPLCEAFMDAAASQGIERAKDYNAAIQEGIAYVQRSIHKGRRVSPARVFLHPAVRRGEVDLRLDSQVVRLCLDGNRVTGVTYRRGGREETVLARREVILSAGAIGSPHILQLSGIGDGTYLKQSGIAVRHALPGVGTNLQDHFAARIVLRIQGARSINERVRGLPLLREVAKFAFLRKGVLTLTPTLLYCFAKSDPALSRGDIQVSFTPASYPGGVWSGLDRFPGATMACWQQRPESRGHVQAKSADPFDAPEIQPNYLVADADQRAIVSAMRLARAIAASEPFAQYVEREAWPGLDAASDDELLEHARQNGNTTYHVMGTCRMGPDSDARNVVNHRLEVHGLTGLRVADTSVIPDMPAANTNVPALMIGERAADFALGRPPLPTADV
>c608
MAHDGNDGKMFLQNDRLRISWPNVGKKPIFEKISTILKEATVPLQGTYIKNPVWNRLTDQDLISVHPLGGCPMGDDASTSAVNENCQVYSGKSGKETYNGLYIMDGSVIPRSLGVNPLLTICAISERACEKLISQKGLTINYNLPSYPKHTNVPDEKTLGIEFTECMKGFFSTQSKEDTERGYQIGKDEGSSIEFLLTIRSENLNEMISNPDHKATLFGTVKAPVLSKDVITVTNGEFLLFISREDKVETRNMVYRMILNTEEGKKYLFVGAKWIQNDGLTNIWRDTSTLFTTIYEGETENSPVLGKGILHILPEDFAKQMTTMKVIHAKSLIDTIQGLTKFGSFFAGALYDVYGGVASSIVPWDKDARPRTKRPLRVSSPEVHFFKAEDGANLRLLRYKGGYKGPVLLSPGLGVSSLIFSIDTIDTNLLEYLFENQYDVWLFDYRTSIALPSAPLPNTGDAIATKDYPAAVNKVRELTKVDKIQVVAHCFGATTFTMALLSGLEGVRSVVLSQISADVEVPTSMDIKVGFHTAEILDALGIKDMTAYTSNHDDWLDRFFNSVLALQPQSLFSHDVNPVSRRISFLYGSLYRLENLNEETYRYGLGEMFGVSNIKAFEHLSKMIRAHKVVNSEGQDVYVPHLDRLNLPITFIHGAQNRCYLPESTETTYKKLIDRFNPNQYRRHVIPDYGHIDCIFGKDAYKDVYPFILQSLNRY
>c609
MAHDYIIVGTGAAGSVLADRLSESGEHSILVLEAGGSDWNPMHRVPKGWVFTMQNDTYVRKYYPEPFGDGTTEQWPRGVVDGGSTTVNGLGWNTGESPAYDWESLGNEGWNWPAFRNALDQIENRSSGLGSLSKKKGKMNVETVSTKDELGDAFIAALASQGAQVVEDANLAEGDRASYASTNTKLGTRWSAAEAFLNPAVKRKNVTKINHANVIRVVFSGTTAIGVEADVNGELKTFLADREVLICAGSLESPMILERSGIGRRDVLDAAGVEVLVESPKVGENLSEHRGISMLYSLNEGLGFNHEINSPLKQLIAGAKYLFTRKGVISSGSFDAIAMVKLNPESKGVDTQLFATAISYDEKMQPRKEAGGLIGGYPMYPTSRGSIHITGPRAADKPRIITGYYETNYDKEMIVKTTHKMREILNSPEMQSLGAKEFYPGEAVQTDEEIVHHSLNFGPFGYHTLGTCAIGPDEDDVVDNRLRVRGVDSLRVVDASIFPHQPSGNNNGPTSAAAWIAADKILEDSLLFKQKEVAIRPVG
>c610
MAHERSYDFIVVGGGPAGCTLAASLASSAKRPSVLLLEAGGRNEDKSLRVDGKRWKTFMKENMNWGSGLHVGYAKDWDLDLTTVLDAFEAAGVQRNLDHNSGNPLGFGLCINSASKGMRLTAVDLLTDVSDNLVILSDSPVQHSASNEVILSAGSLETPKILMHSGIGPADELRKFNISVIHDLPAVGQGLRDHIFAPLIVMRNPESNDRNSFYHDEVAMEAAMMGCRCHYGGDRTLSKTWVLGQVPKMTVNLNTCPPAKWMLEILGIERKWLIRVGRLQSHLSNRLLVHQEHRQANVAVILEELRKVSQFMKSSITCPWTGPVSFPLFSDEDILQFWKNNLSSSWHMTGTVKMGRDGASDAAVDSRFRVFGVERLRVADMSAVPILTNNHTQATAYYNWSNMCRCLDPRIWLE
>c611
MAHHHYDYIVIGAGSAGCVLANRLSADLNCEVLLLEAGPRDRNPLIHMPAGIAFLLDHKTLNWRYQSAPQTAMHQRQIPIPRGKTLGGTSAINAMVHIRGQQQDYDEWCRLGNEGWGYNDVLPFFRQSETNLGTHLDLGYHGTKGPLTISDRAYTHPLSDQFVESAVAMGITHNSDFNGQQQAGAGRYQVTQKESKRCSTATAYLHPIADRPNLTVITGAHVRRIIIEARRALGVSYQVGHKVSTAFANKEIILSAGAIGSPHLLMLSGIGPEPELVKHHIKMQVNLPGVGKNLQDHLNVSVLACTKEANSLLGANKGIGALTTGLRYFWNKSGPGATNAAESGAFVSSKYSPTRPDIQLHFIPLMIFPTPVPELKAHGVTIHACNLRPTDTGEITLASAQPHHAPVIDQRFLQTQGNIERMRESIYLCRNILSSGPFADLISHEHSPGTDVYSDQQVSDFIKATAETEYHPVGTCAMGQGELAVVDAALRVYGIEGLRVADASIMPTLISGNTNAACVMIGEKASAMIIADAKP
>c612
MAHHVAAHAVSSIALLATITLRTVAACDACGEPAAPDACTGSTCAGGSATADYVIVGGGTAGSALAARLCEALPEASVVVLERAAPRTAQQELMAQAARYSFDAWANPGLTEAWQSEPCNGTLPAGKRFAVLTGNTLGGTSAINAAQWTKPPLATVAAWGFTGLNEDVAQALYSRAEARVGVTVLPEDQQATYHARYAAAAAAAGLPPVSDPLNRTEHENGYWYNPAALTKEGARVNAAAAYMLPALKGVCRDNLRLIESATVTRIVLEGRRAVGVEYEIEGEEGAPRVVAAEREVVSSAGPFMSPKLLQLSGIGAAEVLEPLGVEVKVDLPVGLAAQARAQAILSDIYTAAPVAPENNSTLFASDAARERFLSGSGGPLAAPVGAGVGTMHGVNAYLLTVWAFDATYYNLPLLATACVMNSQSRAAVLLSSTDPRAPPRVKLNLLEDPADMADLLSCMHELFKINRGLDKDMGLQPAEPPTETKLRETVANALHFVGGCRVGAIIDGEFRVRGVEGLRVVDASVLPELPRSAGPMSSVYMLAEHAAAGMIAESGLCSCGPHLGCSAEL
>c613
MAHNFTSQLVGSMDLTSTSSTEKLSSSYDYIIIGGGTAGLTIACRLSEDPNIQVLVLEAGANRLKDPNILTPGLVGALYDNPDYDWEFKTVPQQADRNQEILSGRQIPHPRGKVLGGSSAIYQNKITYNSKAGFDAWEKAGNEGWNYTSIEPYLRKFHTYNKPTTQFEKEILDHCHVDEVLSGDDGPIQTSFSDAFSQTDKDFYKVVKEYVKKEKYDEKVVGGIASPSSIDPKTKSRSFSGVAYYNDEAAARPNLRIITEALVERVILEKQNTVLRATGVQFMSVSGQIFKPHANREVILCAGTFHSPAILELSGIGSRDILTSHGIETLLDNPNVGENLQDHAVVAVSFEAAEGIQTADAIGRNPQIMGPLIEMYQKDGSGPLGQFFTASAYMPLPSFFGSRSSSDLVEILSKSSTVANDKIHEEIVLDLLSHPDAAAAHYFMAKIQMNVGTSTNISEYFKPKHPEDYITLFVSQNFPFSRGTVHIASSNSHDKPIIDPKYLSHPLDIELLARQVQFFHHLTSTAPFSHNFKQGGKRIPEYAFADNREPTVEEAKRIVKDHLLSHFHPVGSCAMLPREKGGVVDTDLRVYGTEGLRVVDASVFPLNVRGNPITAVYAVAERAVDIIRGSGKGN
>c614
MAHPTIMLVRTLAPAYDYIVVGSGSGGCAVARRLVEGSDATVLLIEAGQAGFDVAALDDPAAWAPLGRGTYDWGYDYAPTDRVNGRTIGIPRGKVLGGSSAINAMMWYRGHPMDYDAWEEAGCEGWSFAEVLPFFKRAEDWEDGETALRGAGGPLRIERGAPVHPVAGAMLGGAAELGIPVIDDPNGPDNEGAAIANFNISGGKRWSSATGYLRPILAHPRLTVLTGSLAVRLGFAHGRCVGVHHLVEGRLCETRATKQVVLALGAIDTPRLLMQSGIGDPAELSRLGVDVLAALPGVGRNLQDHPLVQSCVFRARQPLGPVVGNGGGTMINWKSSAALPQADLHAFPIQGNGAEARIRELHDLSGEVFSIGCGLMRSKSIGHLRLLGAEPGARMEIQPNYLAEQADLDALVISVETVLDLVQTRAYADWFGGHLAPIPRLSRREIVAYIRNACSTFFHVCGTCAMGAGEMAVTDGRLRVRGVEGLTIADASVIPIIPTCNTHAPVTMIGERAADFLLRAA
>c615
MAHPYPRKRASSPSGSGERECRGGVCSTPVPCQGGEANQSRPTNRSRSISLRRRPTKFYGTAMFRFRERDFEEINFRDGISLSLPFAYSELDPLPNNGVQLTWTRTNQVAHARFAGQTKKLWRRLGAVAVLSHPFGVETPSHQCCAVRMGVDPAHAALDPCCRAYDHPNLYIVDASFFPSSAALNPALTVAAQALRVGDHIARSSAASKRQPADAENA
>c616
MAHSALSNKSFDFIIAGGGTAGLVLASRLTENPDFNVLVIEAGSDRRGDPMISTPGTFLQLYGNKKYDWDFKTEPQKSENGAVHCWPRGKGLGGSSMINFLMYSHCSKSDLNIWRDLGNPGWGWTDIIPYFQRIERMHLPSDPTRTALSTEYIQPSLRGTSGMIHTSWQSDAFSWAQETWPKQSKAMGYPTSTDPRTGTSLGLFNQLTCVDPKDGTRSYAATSYFVAAEGRKNLTVVTESVVKKILWDTSGSKPRAIGVEMETNSSTIQVQATKEVLLSAGTIQSPQLLELSGIGDPTLLQTHDIPLVVSNPSVGENLQEHPMVVLSWTTKPGHPTAEHLRDDPSLLAQAMDTYAKTGGGPMAAAVTTTGFLDLHSVTRPGTDWSALATPDTHLPQRQLDLLMTQLEDKKEAVYQVSAIPSGNTPSLRGIGNSAMFFHSVPGNYFSMSCGLMHAFSRGSVHIKSSNVHDYPEIDPRYLSHPMDVELLAHSLFHMKEVVKTPPLADFLKDASDGSGEKEFMPGLKPFSTLAEARELAKERQLTMYHPTGTCAMLPREEGGVVDTELRVYGTEGLRVVDASVFPMNVQGNIMSLVYAVAEKASDVIKETYAGERKANGVDGTSH
>c617
MAHSSATRCGGPAAFAPPLGVRVMGATRPAAAAAVGASPTTASSFTPGGGAGVASRSRCTRPATAAPSGAAVRMTTAAPSSPSVASRSTPASSSTVDYIVVGGGAAGCVLAARLSEDPTKRVLLLEAGGRDTKRMLHIPLGFPYLLGSDVDWAYTTEPEEALGGRRLYLPRGKVLGGSHAISVMLYQRGDTADYARWDAAAGGNAGWSAADMLPYFKRSEANTRVLGGGDGELSPADAARIHGADGPLAVSDLRCVNEMSSAFLSAASAAGLARNADFNDWERSQEGVGLFQVTQRNGARATPATTYLAAARGRKNLTVLTGVTVERVTTTAASGSSPPRATGVEYIDADGQRHVVAAAVETVLAGGVFASPQLLMLSGIGPAEDLQSHGIPVVVDAPGVGANLQDHPATMVSYLSHEPMQDKRKSSVYYTEKTGKSLFTLLRYAFGGKGPLTSPMCEAGGFVTTPSAAADGRSSADLQLRFIPFASEPDPYASLGEFAAGGSYLTNSSSRPAGFTLQSVVARPVSRGRVSIKSASVTDRPVIEAGWMKSEEDLATLVDGMKLCRKIAAQEPFSPYRGTERFPGGDVVSDADLADYARSTCHTANALVGTCALGDVVDAQLRVKGVAGLRVVDSSVMPTIVGGQTGAATMALAEKGADMIRAAAVAEAGAAAAAASATL
>c618
MAHSTSSLTCNASFLGPTLQEMCGGSSYYLFMSLLNAFAIRKQAIGGTCERVTSIVSPNREYDYVVIGGGSAGAVVASRLSENPKWKVLVLEAGPDEPPGAEIPSFFNAVVTSSLDWGYSTTNESYACYSTNGSCTCHSVKVLGGNMVHTGMIYLRGNPTDYDKWAALGNKGWSWKDVKPFYLKCEDNREIDRVGRFWHATGGPLSVQRFPYEFPITKAIRDASLEAGFGTSDDLNGDQLTGFNVVQTTTKNGVRQSTGTAYLRPVRDRKNLHISLNSTVAKIIINNKTAVGVEYYQNGQLKKVAVSREVILSAGTVGSPQILLLSGVGPKEHLESMGIEVVKDLRGVGENYHDHISYSVDFTVNEPDVYDNNWAAATEYFAFQTGPLSASGLAGLAIALNSSKSTSDYPDIQLAGYGYIADCAPGDIGALRSKGKRTVSIWVGYQHPKSRGRVRLASKNVTALPVIWGNYLADYRDVEGLIEGINYTLTLSKMEAFKPYNLTLTNQPVAACSDYTFLTNEYWACAIRWSLSPQNHQVGSCKMGPPDDATAVVDPKLRVYGINRLRVADASIMPQIISANTAAPTVMIAEKAADMIKKSHQHRSCKNY
>c619
MAIAPDVVSHEQSYAREEKLNEATSQYGMTIDFDPEEIRKKYEAEKAKRDNNGGLGQYIRSKDVNIVHYDEDPYAKFPVERLPVDAIFDVVIVGAGYTGLQVAARLIENGLTSICIIEKGSGVGGTWYWNRYPGLQCDIESYIYMPLLEDVGSKPSRKYASGFELWQHADRIAEKFGLKDRILFQTIVSKMSWVEEDAHWKIDTNRGDNIRARWTISASGPFHAPKFPGVPGIEKFQGKSFHSCRWDYDYTGGSFENPTLDKLADKTVVIIGTGATAI
>c620
MAIDEQHRLLWSYSDVTILVLEAGDLLLDDPRPGWPRVSLGKVVGGSTKLNQMTFNRGSSSDYDRWVELGNEGWGWEAFLPYFKEVQRSSISNDDKIAHESIQSEFFMPPNKDIAQEYNITFDPSVHGTSGYLQSSYSPFFWPTTSQLLCIYRKDMVNRANLFSLVENLVQAVKELGINMAFDQADGSPLGGYFNPHSQDPVYVTRSSAREAYYDSASGRTNFHLVAGRQVTRVLTEKHRGTVKAIGVEFAKSRHGIHETVRAKKEVILDAGSIHSPQILQVSGIGDPALLSSINVSTVVDLPGVGQNFQDHAMVKVTNKINAPLQRSNLTDATFAAKVREQYEDYRKGPLTSPLGDFLVFMPLSNFSDASSDIYQAINQDGTEYLLTDTPNQVVEGCKRQHKILNDQLLDFKSAILEVIWDDGEMLLCLQHPYSRGSIKSMSPSTFDAPVADPGLIKNPLDIAILAEGIIFSRRLVNVPAMQKLEPLEVVRGADVTSNEALEEFIRSTVSNFYHPAGSCKMGSREEGGVVDAELKVYGVEGL
>c621
MAIDHPSMHPMARWRQKVESGKERKMLIRGRDVEAPFRMEGEVCVVGSGAGGAVAAGETAVAGRKTILLEEGSYLKGTDFTQREDEMIPRIFQDQGGRTTRDMSISILQGRGVGGSTVHNTCLSFRPERAILERWREEYGVEIGLDDLLPDIERVEKTLRVVEVKPEEVNRNNELFRLGCERLGIPARRPFHNREDCLGCGFCELGCVFDRKRDMLNTYIPMGLAAGMTLCSDFRVERIVHRRGRVLGVRGIVLDTETGTPRHPFEIRAPRVIVAGGAINTPVLLERSGLAGPLTGKTLHLHPSVAVAGFFREKVEGWNGTPQTIYTDHFATFKKNGYGGYFLIPGFAHPAGTASMLPGLGRAHFTLMKRFPHMAVAGVLLHDETCGRVRAGKHGQPQISYWPSGVDQRGLMSGIEQAARILLAAGAQEVLL
>c622
MAIDQFSLDMLALAEENVMRGKITRREFIRVAIAGGLSFASASSFAANAANAVANQSRNVKALSRRYDYVIVGAGTAGIVVASRLSENPAAKVLLIEAGGWNEVKSVEDPALWPTNIGTAASYVYPYVKAAHCNGRTIPLAMGRGIGGGSAINAMVWARGHRENFEKWAELTGDSSWGYDSVLAIYRKIENWQGDPSRWRGERGEIFVDKDRHNNPIVPAMMRAAASVGIPSTDDLNGQTMEEDGGCGVAQTLIKDGRRYSIANAYLYPALSRPNVTVLTDSTVIGIELTGDRATAVRLLHAGAEKRIEASTELVLSAGSVATPKLLMLSGIGDSEDLRKLDIRVAVHSPNVGRNLRDHILMGGCIYEYKEALPPRNNLGECTLFWKSDSALPVPDLQPFQIQVPYATDEVAKQYAIPVAGWSLLPGLVQPKSHGQITLRSKDVRQMAIVDPNYLAEPDDMKALVRCVEICRAIGSSPELSEYVKREVAPGRLDRQATENFIRNAAGTYFHLSGSCAMGREASSVVDPQLRVRGIRNLRVADASVMPNLTTGNTMAPSVIIGERLAALLTS
>c623
MAIDTFLDMARLPNSTIKYNGAENITGADIVAAAPRRGGSHMIGTTIMGLDRKTAVVDTDCKVYGTDNLFIVDAGVHADLPTGNTQAIVGVVAEHAVQKIIALSGGNGTGYRRSTPSRVRESVASPVRREPQEPSGFASDSGP
>c624
MAIERVDICIIGSGFGGSITAARLSEDGDRNIVVLEKGKRWKGDEFQQSQDPKYIFQLYEDITGDGIFVGLGKGLGGGSLVFSSLCLRAPSSVFEQDEAGKRIWPEWYTRKNLDPYYETAESVLKVVQLGWTTEDGVPSWQLV
>c625
MAIEYDADVIVVGSGACGSNVANELAKQGKSVILLEAGPNTPRWKILENFRNSGRHYDRNNAYPNNPWAPTSNQPGYIKNIGNFREQPGMLKLVGGTTWHWGGATWRYIPNDFKIKSLYGVGRDWPISYDDLEPYYCRAEYAIGVAGSDSEDQSGKNPGQAYPHRSQPYPVNAEEDVYNSTLLKKALIPHGHSVVHEPTVRIHKPYEGRPACQGNNNCDQVCPIGTLYNGSISADQAVRNGAKLISEAVVHKITKGEDKKIRSISYLTSTGQEHTLTAKYFVLAAHSFETAKLMLMNDIGNSSDMVGRNLMDHVGISMSLLAPEPVWSGRGPVQQATIMTSRDGAFRSDFSANKHTLGNNNPQIDIANRAISEGLMGKALDERILDWSARIMNFYSFLEPLPEPTNRVEPNSDWKDSLGLPGLKVTFNASDYVKRGANHIAKEYKDIAQLLNGEIITINEELENHDHLMGTMIMGKEASDSVVNHEGRCFDHNNLFIASVGVIPAAGVVNPTLTAIALAIRSADIIAKEV
>c626
MAIFTALPENLSEVDIIVAGGGTAGCIVASRISDADPTLTILVIERGPNNLGDPTVAFPMLWATHHLPGTKTAKACTGKEEQQLGSRAVSIVQGATLGGTSSINMVMYSRGQSCDYDSWKSPGWTTKELLPYFKKIETYHGEAGAGGHGYDGPVHISDGSFRNLALERDFIRAMDQVGYPEVEDLHDFQSNNAVSHARRTVTPEGLRNDTATAYLHPRLQDGKHPNLHVLVQADVIRVLIDQDKIATGVEYRPDQTLFPDSPSLKVSARKLVIVSCGTLGTPSVLERSGVGDPDVLDAAKVPVVARVPGVGQSFQDHQLVYYSYKADLAPQDTFDGIFSGRVSVPDLIQKQDKILGWNGYDASAKIRPTEAEVDELGPEFRARWDRDFQQEPQKPLVGLILAAGLLAVVNPYPEGQHYSIAPYTCYPYSRGHIHITGPSIDDPTDFETRYLTDEHDIDLKTQLWAYKKQREISRQMRTHLGIVPEWAPQFPEGSSASYEHDLPDESGELRELKYTSEDDDAILAWLKNPLSVAGSAVGVISLGIQVAQSLFDYYSAFKSQYTDVADIAKKLDSLLEVLGTLQNHVKNRRFQEDEQDLLRKIEGLISECEECIEELQEVANKFAQRPISTAQSAIRATARRVSYPIRKSTLEKLDEDVSDIIKCLQLALQLLQQEAVARVQNELEDVKSLLNLVWSSQISSDIRDWLKAPDATINFNAASKKRHPQTGLWLVKDNTIFTDWLISPGSFLWLRGFAGCGKSVLCSTAIQYTYRHCRSDPKTGIAFFFFTFNDENKQDSSALLRSLVLQLSTQSDESADLARLHDRFRHMAPPDEVLRDCLRRLIGTFQDVYIVIDALDESPRDKHREAVLELLRDIRAWQEPRLHLLITSRDEIDIRNELNADSSFIVEMRNDEVDKDIALFITQSLRDNRRLAKWSQHHSIIQDALTQRAKGVFRWVECQFRALVSCPSNQHLLEKLLSSLPESLDDTYVRMLRNITPNLIEYAQSMLKILCCAVRPLSDEELLDALAVKMGENFQYDPTRRFNNLDALEEICPGFIEVVTDFNTRNVTVRIAHFSVQEFLEAERILGYQEIASFHIKRPQGHTHMAAICLALLLAARASPALQYCARYWPEHLVQCDARAQIENEAVPLFQSTTGYFRRWVETWNMDNVFGILRDDIPTPLYYASSLGLASVVNTLLGSRGGGAKPTLTMHVVPPMIAIDSEPSSVLDVSENHIDVNVVDGDYGTALHAASSNGHRETVQLLLDHGADVDVFNRRYRTALQQASMKGHQAIVQLLLDYGADINAVGGIRGGTALQAALFIGHQETVQLLLDHGADINAAGGHYGTALQTASFVGNQEVVHLLLDHGADINAAGGHYGTALQAASTQGYQEIVRLLLDHGADINAVGGDYGTALQAALVEGHQEVLNLWAAGSGAFAGQRASPDARLAVELETQTFAISILILLLGCLKNCEHMGENLSSFLFVLDPDQKLQVSDCTRRNTMQLSLSQGLWKWFLLQQTA
>c627
MAIFTKVAGNLDEVDIIITGGGTAGCIVASRLAAAGPNLRILVIEAGRNNHNDPSIKFPAFFPQNLLPGSKFTKVLHGSKAKELGGWEIVVAGGYGLGGGSSINAAMYVRGHPNECGPAQIRSAERGSWPYKASHFWMQRVSWVQASSQVV
>c628
MAIGELSAHEAERVVWDVIVVGTGMGGGTLGYSLARSGRKVLFVEKGRSTLPDAPDTIRSSWPEVAEPRAGRSIETYYAALARAGRSTDQIEDISGRRTKMFVPFLGSGTGGSSSLYGMVCERFFERDFTPRQDFRDPGESTVPEAWPITYGEMRPWYTAAEELMGVRGQRDPLRPETADEHLPAAPPFSTDNQPLVDYLTGRGLHPYHLPMACDYTDECATCQGYLCQRSCKNDAGRNCVLPAVTEYGAHLLAECRAVRLETAGSQVRQVICEDRSGTVVLTGKVVVLAAGALATPVLLLNSRSGDWPGGLANSSDWVGRNLMRHLMDMIEIWPESGSRITAQNKEIGLNDFYFWEGQKYGTIQSAGSAEGPMELMTNRPGLQAKALRLVSPAARRVYERFFSGGLVLASILEDLPYLDNRVSLSGEPNSNGRQRIQIKYRIHDNESARRATFLRQLKDLFKPFRTLVLPVAKSNTTVGHVSGTCRFGTDPKSSVLDPQNKAHGVDNLYVVDSSFFPSSTGLNPSLTVAANALRVAAHVDQAHFTS
>c629
MAIGNTSFDYVIVGGGNAGLTIASRLSEQQSVRVAVIEAGNPYEYTSGNFSSIPGNDVYYNGKDPDDTNPLLDWGFTTIPQAVMLLYTMHVLGGCTALNYMGYQRTTKGALQRWADEVNDQSWAYENVSQYDNKSLSFAPTDMSKRIGNATPYYDTSTLGNNSPLKLAYTNYTQAISTLFSKLLEAVDIMLVHGFTSGALNGSAFLMGTINHTVGNRDSSERAFLRPFLDQPNLSVFNGMLAEKIVFDGVTARAVQVSYSNATKSYLQRTS
>c630
MAIHKGKRRKEDHLNMASTHMVAASGDEPAVVQILGFCKRNWFILLPLFIIIRFLYYRYSSPLRHYPGPFLASGSRLWKVLSTYSGKTETDHILLHEKYSPTGCGRKLSRGSSEGKNNGGSGGGGGNLVRIAPNELSLSSPLAAREVLAVGKGFHKTDFYAVFPPPENPDIFTETRESVHAVKKRYASHAYSMSAMQQLSGCIEATERLLVEKLEGVASAGLREGEGKGGGVVDLGDYLHYFAFDVLGEVAFSRKFGFLDAGADLEGAIKTIDEMQWYDGIVGQIPEWDWVFRRNPLWKLVPGLDPARFLITRMAREEMEKRKRIGEKEVESGRKDLLSQLMAAHEKAPGQFGEGDVFAVAHGAIFAGSDSTASTMQSFCHFVLSRPQVHARLKEEIDEASQGGRLSAMPQWNEVQALPYFQACLKEAMRLRPAVGLNITRLTPPGGAEIDGQQIPGGVRIALNAWVLHRNEDVFGPDAKVYKPERWLEDAEKAKAMERCMFQFGGGSHLCIGKNLALLEMNKLLPLLFRDFEMELVHPGTELKYHSTFFVVQSGLETSFLEYAMKSSSLKVYPRAFTRQIIFDANKTATGITVQAGQTNFTLNARKEVILSAGAFQSPQLLMVSGVGPENTLSQYNIPCVKHLPGVGQNMQDQPFFGIDYRVNVETSSMLVNDPQYHEDAVQKYLENATGPLANSPGFIAFERISQNQPSLLSNSTIEALNDNFPDDWPEAEYLVGNGYSGYNRNYRTADPGDGYNYAAIYSALISPFSKGNLTISSPDMAVQPVINPNWLTDSRDKELAMAMFKRIRDIWANMRNVTIGEEYLPGPNVTTDEQIMEYIQESVIQIYHAAATCKMGRSDDSMAVVDSRARVYGVKNLRVVDAAAFPFLTPGHPQSGVYMLAEKIAEDIRLEREERIQTNY
>c631
MAIIDPIVTGLNSGWLHTDASQLQENQQFEADVVIVGTGAGGGVAAEILTQAGLSVIMIEAGPLKSSSDFNMEERVAYPNLYQQAAAMKTADKAIGIFQGRAVGGSTTINWTTSIRTPKEALAFWAQHKSVAGLDPEALAPWFEQMEHRLNIHEWNYEPNRNNGALKQGCINLDWDYTVIKRNVAGCWNTGYCGMGCPVNAKQSMLVTTIPTALEKGAQLVSRAKVIKIEHHNGQVFALKAQALDVNLRPTSVELLFKAKHYILSAGAIHTPTLMMRSEVPDPYQLLGKRTFLHPTVLSGGVFADAINAHSGAPQSIYSDEFVWKNGADGELGYKLEVPPVHPILIASKTIGYGVSHAELMAQFNQLQVTIALIRDGYHPDSQGGQVHLTSTGFALDYLLSEAFWRAARRAYASMAELQFSAGALKVLPISDGMPYLSSWKEAKESIAQMDLAPLRTVVASAHVMGGCPFGEDEKLSMVNSYGQSHYLDNLSVMDGSIFPTSLGANPQLSIYGITARNATALAQKLTDGRESQ
>c632
MAIKGSILCLLLAATTQCSNDQVDNYVELIKKESQRAYRTFAKDSSEYQSPDEVPSYYGTFHYIIIGGGSAGAVITTRLSEDPGTNVLLIEAGGTGTDFTEIPSMNDFTLGLEFNWNYNSTPQTTACLGTFNQECPYPTGKGLGGGSTVNSLMYVRCNRRDYDNWYRKGNRGWAYKDVLPYFIKSERSHINGDPGYHGYDGLFNVEYHKPSSIELGAFIQANVELGRKIVDYNGKEQLGVAKTQHNTKNGRRHSTWRAFLKPVIHRPNLKILTHSLATKVLINKDKKAYGVAFSGNGSFRYAIAEREVVLSAGAVGSPQLLMLSGIGPRKHLQSIGIPVIQHLSVGDNLQNHCRYTVYFVTNNTEPAKTLEQNVKDYLNGSGPLTIAENGQGLGFLRTKLSKVPGYPDVELVVSPPNCTATTTQQILHYTDEVMDAIYKKIAPSQTFAIHVVPLHPKSWGTIRLSSKSPYKYPLIDPKFFSDRGNEDLETMRQGIQLALQIVDTEPFRKIGARLLDASLPACQAYRYLSRKYWYCHIRQLALNVYHSMGTCKMGPRPSRGAVVDDQLRVHGVEGLRVADASVIPEAVSGHTNAVAIMIGEKVSDLIKASD
>c633
MAIKIPRCIETTISAPLLQWSFEGLRTALSVGSMVGFMAFLELLIMFMRPDIVDRDNRVRVVSPEDMLSTYDFVIIGGGSAGGVLANRLTENADWNVLLLEAGDDEAVISEIPAMFLNIQRTYMDWAFKTEPSTNYCKGMINNQCSWPRGKALGGSSAINYMLYVRANRKDYDIWRDLGNPGWGYDDILPYFIKAENISISDLRESPYHGTKGYLTVETYKYKHPIGSYFMKAIQEMGYDEVDSNGETQTGAAYPQGTLQNGLRCSVAKAYLRSISNRSNLHISTNSMVHKILINETTKKAYGVEFVRENVRYTVRAKNEVILSAGSVQSPQLLMLSGIGPKKDLEEIGIRVILDSPGVGQNLQDHVALGGLTYLIDPPYNLSTSTFSAAEQFLIQREGPLYDASLSEVLAFINTRYANSSEDYPDIQLYFGSTADNLNKAGIEHGFGVRTDFYDSLNADIIGNDSYGVIPLLLRPKSRGYIKLRNSNITSPPIIVPNYFDDPHDLDVLAEGAVVVYNFSQTPTMKKLNATANPNLISECAHLNFPSHDYWRCYSRFYSLTIYHPTSTCKMGPDDDGMAVVDPRLRVRGVEGLRVVDASIMPNIVSGNTNAPVIMIAEKAADLIKEDWCVYPRARNQSADSDANCNSTSNVFLSSIQFRYFIFAYCVYAYFENSFYI
>c634
MAIKLSQSGKNVCVVETGSDALAADYQNFNSGQQTGPREHLGLTRGRYKGLGGTTRLWGGQLMPFSPADFLPDPASNKPGWPFTHDEIAPWIEEALGMLGIAHDAEALEVSWQEKTGHTLEFGSGLQITPSVWMRRPDFNHHFDAAIASNDGPQILMGHEAIGVVSDDTSGRISGVRLRDHTGGKHTLSAKSTLLACGTLEISRLLLRAKAQLPQTPLGKNGHVGKWFIDHLHGVAGTIHPQNRKVFGDMFDTLYAREHKITPKIRLSDATMKANALSNCAMTINARLGAGEAIAEMKGLAKRIGNGPTGALQDLRQTAQSARILAPLAWRYLTSRRSGKFLSGDASLGVEFEQVPSIGSYIALQEDVHPERADIAVHWSVNGTEMAAVAHCAKATKAACEGRGLGLIELDPLVEAADPAFFDKCTDSSHQAGGARMAASAEGGVVDSDCQVFGMPDLYVAGAATFPSGSFANPTLTAIATGLRLADHLSGRG
>c635
MAIKTNIPFTADYVIIGGGTAGLTLASRLSENSTESIVVLEAGSNLLEDPRAALGNRVIKEPQGKLLGGPSGISSQAFVAPSQSGIDAWSKLGPLKVSFPAAIQDPLCRAWVDTFKATGHGITADPFSGKSTGGYSNLSAVDSETKTRSYAASAYGRSPMERPNVHIVTEALVQRILFKGLKESSVTAGGIEAVIQGEIHTITANKEVIVCAGALNTPKLLELSGIGNKEILHQYNIHVVVNSPSVGENLQDHLMSGISFEVVNGVVTGDPLLRQEPEAVQAAMQLYMEHKTGPMTIRGVQSSSYMPLVYFQGQNSSTSIKEYLDGFFLRSSDRDHAIREIIGQPDAPTCSTILCILI
>c636
MAILNSMYNNVSPLQCTSPFLGGPQLTDVCSASNGELFLALLNFFVATSPVIGEPCQRVHSSRIPDLSYDFIVVGGGAARAVVAGRLSEVSNWKVLLLEAGPDEPAGAEIPSNLQLYLGGDLDWKYYTTNESHACLSTGGSCYWPRGKNLGGTTLHHGMAYHRGHRKDYERWVQQGAFGWSWDEVMPYYLKSENNTELSRVGTKYHRSGGLMNVERFPYQPPFAWKILKAAEEAGFGVSEDLSGDRINGFTVAQTISRNGVRLSSARAFITPFENRSNLHVIVNATVTKVRTLNKRATGVNVLINGRRRIIFARREVILSAGSVNTPQLLMLSGIGPKEHLRSLGIPVVVDLPGVGENLHNHQSFGMDFSLNEDFYPTFNQTNVDQYLYNQTGPLSSTGLAQVTGIWHSNLTTPDDPDIQIFFAGYQAICKPKLKIADLSAHDKQAVRMSALNVQPTSKGRITLNSKDPLDPPVIWSNDLATEHDRSVMIQAIRVVQKLVNTTVMRDLGVEFQKIELKQCDEFVEDSDDYWNCVIQYNTRAENHQTGTAKMGPSYDPMAVVSPRLKVHGIRGLRVADASVQPQVISGNPVASVNMVGERAADFIKEDWGELLQLLX
>c637
MAILRRNEHQTKRPRVVVVGAGSAGAVIAARLSQNQDVDVLLLESGPDVAAALEADGIQSTNFVEALEVENRNLRIPVRRTASQGLSDYVRGVGTGGSSSVNAMVGMWGMASDYDRWERDLGCDGWSWRDVAPVFANLPIPLFTTLLGEWGNVDRALVDAATDLGFERRDDLSTASLAGHGIGAVALTCNGGRRASVNDIYLEPARSRFNLEIRGSSAVDRLNMNGNDVVGVHLANGSDIDANAVVVCAGAISTPQILLRTKIQRSGIGHGVKDHPAVAFTLALKEPSEARYAISTLLRTTSTRTGKHNDNSQTEQGNIHLLPLNHTTAHDKMHGAMFAAVMRVYSTGSITLAGLHDNQPDGGRNSAKIDLNLLGDERDMDTMTEATLMLATMVEGRSFAGITNSVSNELTTDDMQGWLLNNVGSYSHIGCSSKMGALSNEDAVVDTAGKVIGYSHVWVCDASIFPDLPSGNTHLPVVMMAERISQRISESLLPN
>c638
MAILSVPKCLDLLSQKIDNPEYSLSEQEWERTRYSGDFDYIVIGSGPCSLGFVDRVLQKNHNARILVIERGGELLRDHFQNLCPLANRETILQEIEIFPWIWAEENRNNQYIKKQVGIVPFVGGRSLFWSTWCPRPEPSEMEGWPQQVIETIENYLDSAERLLHVTPLDRIGKGKFYGVLQGETLLWLQERLNSLSNNNIPQRVSHARLAAQPTLYNQDFWKFSSVTAFIDLWKNNRPKLKFMTGCFVKKIEFQGNQATSLETTRGSVNIANSKVILAIGAIPATTLVLNSLGDRISNAGTHYTAHFTSSIFARIKREHFRFQDALGNLELAGLYLDGRDSETQGQYHMQLTAVSIRKLENELGRVQAKLQYQNDLALAQFYMPSLISPIINDQLEENRNYICFGISALGEMRINSESRLDLNNLPNLNSDVNLRAILKEDDYRLWNNMDKAIYNVIEQALTPDKPNPYSPNQVEYWRVKNNQGSWSDKQRPSRKQIRKSFLVHEGSTLWLGNDDDAIVGLDYRLKSGQEVVADNIYITGSALWPRSGSWNPTLTMVALSQHLADTLERNRNS
>c639
MAINDLYSEGIARGWQVLDASAFTHDREFEADVIIVGSGAGGGTSAEILSAAGLKVLMLEEGGLYTASDFKKFDESWAYSKLYQEGAGRATSDGAIGLLQGRAVGGTTLVNWTTSIRTPAKTLQHWAQAAELRDAGEEQMRPWFEAAEQRLGIAPWAMAPNANNAVLRDGCDKLGWHWKVVPRNVRGCWNLGYCGLGCPTNAKQSALVSTIPAALERGMVLVHHVRAQRLLLKAGRVEGIEALALHHDTRQPQGTKLTLRARHYVLAGGAINTPALLLRSQTHDPHKAIGNYSCVHPVNLSVGEFDKPIEAYHGAPQSVYSDHFLWPEQGIGYKLEAAPLQPLLAAIVLGQYGAELAASMAQLSQAQASIALVRDGFVEGAAGGRVRIDARGEAVFDYEIHDTLWDTLRRAYLSMAELQFAAGAKRVRPIHLDAQAYSSWAQARQAITELPMRKQRTAVVSAHLMGGCAMGENRKRCVVNSYGRHHELENLSVFDGSMFPTSIGANPQLSIYAFVTRNATKLTESLKA
>c640
MAIPCRIRRVRRGRRMRLRKEDDRGARLHRYRRQTAALREFEDGRDAFEAYGRFRRRCSVFRNERLRCGRDGRRRRRGEASGVSIRSGVREARGSRRLRRGSFRGSRTASGDDPRACARRGRAWSRLRAKNRPGDLSRAPRFLRISTAGAGGSSAGASAAQPQSHRQMPLLPAAGGGSARNLRPTRARGTLAPGRTGAGRVSVLRCDAAVIGSGAGGACVAARLADAGAEVLLIEQGRRAFPRTDAMEVVSDCYADAGFTTAAGNSLMPIPTGRTLGGTTTINSGTCLSTPPGILKKWERASRGGFSAAGFSIYLDEVRRLLRVKPAPERTRSESSRLILKGAARLGLDSAGALDRCEDGCRGEGRCCFVCPSGGKMTSEKAFLETRADNPRLRILTGAALLSVSERRRAGVPVRAVLRSQGKTFALECGIMVLSAGTLASPYFVRRWSAEAGRGLSVHPAAKLFAEFEASVRGWEGVPQGVGFEDSADPDIRFEGVYTPPELAALTMPLEGLRLREWMERYDRVATFGFMIRDEARGRVRYPMGPSRPWIRYDMTPRDLRLMGSGMRRVAEVFFAAGAKRVVLPLNRAGNVLESEAALKAFDPDSVHPRDLQTMAFHPLGTCAIGRVVDYELRAAPGVFVCDGSVVPESLGVNPQMTIYAFALRLADYLIKGGVRDS
>c641
MAIPDEFDIIVVGGGSTGCCIAGRLANLDDQNLTVALIEGGENNINNPWVYLPGVYPRNMRLDSKTATFYSSRPSKALNGRRAIVPCANILGGGSSINFLMYTRASASDYDDWESEGWSTDELLPLIKKIETYQRPCNNRDLHGFDGPIKVSFGNYTYPTCQDFLRAAESQGIPVVDDLEDFKTSHGAEHWLKWINRDLGRRSDSAHAYVHPTMRNKQSLFLITSTKCDKVIIEDGKAVAVRTVPMKPLNPKKPVSRTFRARKQIVISCGTISSPLVLQRSGIGAAHHLRSVGVKPIVDLPGVGENFQDHYCFFTPYYVKPDVPTFDDFVRGDPVAQKAAFDQWYSNKDGPLTTNGIEAGVKIRPTEEELATADEDFRRGYAEYFENKPDKPLMHYSVISGFFGDHTKIPNGKFMTMFHFLEYPFSRGFVRITSANPYDAPDFDPGFLNDERDLWPMVWAYKKSRETARRMESFAGEVTSHHPLFKVDSPARARDLDLETCSAYAGPKHLTANLYHGSWTVPIDKPTPKNDFHVTSNQVQLHSDIEYTEEDDEAIVNYIKEHTETTWHCLGTCSMAPREGSKIAPKGGVLDARLNVYGVQNLKVADLSVCPDNVGCNTYSTALTIGEKAATLVAEDLGYSGSDLDMTIPNFRLGTYEETGLARF
>c642
MAIPDEFDIIVVGGGSTGCCIAGRLANLDENQTVALIEGGENNINNPWVYLPGVYPRNMRLDSKTATFYNSRPSPHLNGRRAIVPCANILGGGSSINFLMYTRASASDYDDWESEGWTTDELLPLMKKFETYQRPCNNRDVHGFDGPIKVSFGNYTYPNCQDFLRAAASQGIPFVDDAEDLKCSHGAEHWLKWINRDLGRRSDTAHAYIHPTMRNKQNLFLITSTKAEKVILENGIATAVKTVPQRPLDAKKPSHKIYKARKQIVVSCGTISSPLVLQRSGIGAAHKLRQVGVKPIVDLPGVGENFQDHYCFFTPYHVKPDTPSFDDFVRGDKTVQKLAFDQWYSNKDGPLTTNGIEAGVKIRPTEEELATADDSFKQGWDDYFANKPDKPLMHYSLISGFFGDHTKIPNGKYMCMFHFLEYPFSRGFVHITSPNPYDAPDFDPGFMNDERDMWPMVWSYKKSRETARRMECFAGEVTSHHPHYPYSSPARAQDMDLPTTKAYAGPDHFTANLYHGSWTVPLGKPSEKNEIHVTSNHVELHNEIEYSKEDDEAIENYIKEHVETTWHCLGTCSMAPKGGNRNAPKGGVVDARLNVHDVKHLKVADLSICPDNVGCNTFSTALTIGEKCATLVAEDLGYS
>c643
MAIPEEFDILVLGGGSSGSCIAGRLANLDHSLKVGLIEAGENNLNNPWVYLPGIYPRNMKLDSKTASFYTSNPSPHLNGRRAIVPCANVLGGGSSINFMMYTRGSASDYDDFQAEGWKTKDLLPLMKKTETYQRACNNPDIHGFEGPIKVSFGNYTYPVCQDFLRASESQGIPYVDDLEDLVTAHGAEHWLKWINRDTGRRSDSAHAFVHSTMRNHDNLYLICNTKVDKIIVEDGRAAAVRTVPSKPLNPKKPSHKIYRARKQIVLSCGTISSPLVLQRSGFGDPIKLRAAGVKPLVNLPGVGRNFQDHYCFFSPYRIKPQYESFDDFVRGDAEIQKRVFDQWYANGTGPLATNGIEAGVKIRPTPEELSQMDESFQEGYREYFEDKPDKPVMHYSIIAGFFGDHTKIPPGKYMTMFHFLEYPFSRGSIHITSPDPYAAPDFDPGFMNDERDMAPMVWAYKKSRETARRMDHFAGEVTSHHPLFPYSSEARALEMDLETSNAYGGPLNLSAGLAHGSWTQPLKKPTAKNEGHVTSNQVELHPDIEYDEEDDKAIENYIREHTETTWHCLGTCSIGPREGSKIVKWGGVLDHRSNVYGVKGLKVGDLSVCPDNVGCNTYTTALLIGEKTATLVGEDLGYSGEALDMTVPQFKLGTYEKTGLARF
>c644
MAIPEEFDVIVCGGGSTGCVIAGRLANVDENLKVLLIENGENNLNNPWVYLPGIYPRNMRLDSKTATFYNSRPSKHLNGRRAIVPQANILGGGSSINFMMYTRASASDYDDWESEGWTTDELLPLMKKFETYQRPCNNRDVHGFDGPIKVSFGNYTYPQCQDFLRACETQGIPYVDDLEDLKTSHGAEQWLKWINRDFGRRSDTAHAFIHSTMRNKENLFLMTNTKVDKVIIEDGRAVAVRTVPSKPIGDSKVSRTFKARKQIVVSCGTVSSPMVLQRSGIGEPSKLRAAGVKPIVELPGVGRNFQDHFCYFVPYRIKQDSESFDAFVSGDKEAQKSAFDQWYATGAGPLATNGIEAGVKIRPTEAELATADKAFQQGWESYFENKPDKPLMHYSVISGFFGDHTRLPPGKYMTMFHFLEYPFSRGWLHISSDDPYAAPDFDPGFMNDDRDMWPMVWAFKKSRETARRMECFAGEPTAFHPHYKVDSPARALEQSAEDTKKVAGPLHLTANLYHGSWSTPIGEADKHDPNHVTSSHINVYSKDIQYTKEDDEAIENYIKEHAETTWHCLGTNSMAPREGNKNAPEGGVLDPRLNVHGVKGLKVADLSVCPDNVGCNTFSTALTIGEKAAVLVAEDLGYSGSELDMEVPQHKLKTYEQTGAARY
>c645
MAIPIQFLTRFAIPLIVAAFYLEGNAPEQANLYSKVLEESDRTLSIANGEGEGETEFYDYIIVGAGSAGSVLANRLSASGAFTVLLLEGGGDPNPISEVPWFVDDLDEGGMLLNYVTTAQEKACITRSNGTCWFGRGKAMGGSSSVNGLVYNRCAAKDYDSWANFTGDQIWAFNSVVDAFKAIETYNGVYHENPSPNHGTSGPIYIGHLDYAPGFEVLEEALTEKGVPIGDLNSGEFPFGFSKLDHNIKDGLRWSAWHGYLEPILSRSNLKIYRYAWATKVHFNANRAIGVTYERHGQTRQVVANREIILSAGVIDSPKLLMLSGVGPSAHLAEHGIETVLDLPAVGTHLQEHLGVNLHPFFVNQTFSASNPLTPENINLFIKNTTGPLANMKSWGTYATHIAHGYFPSKLYNDPTWPDLHCYINQVFATPEGLPAEQQVFVELEMVLTNQEGTVRLASTNPRDDPIINPHFLENPLDTQRLVEGIEYVTDLFLNSTTWQRLGIRWSDTFEKIPQCEQFVFPSVEYWTCFVEMNTGPALHPTSTCRMGPNSEVAVVDSRLRVFGSTGLRVIDSSVMPFVPNGNTNLPSIMIGEMGARMILEEILE
>c646
MAIPSDAVKPTLTSDQVKVLIAIVDTFIPELTGQELENFVRDYSDGTNEEALRAFAKAGIVNQNLADTIVEKIHSLPPEKIEELGTVFKLLSTKLGTLALGGTYGDFPSLSREQRTQIVLSWSNSMITKFRILSRAMCSLAAVTFYSSPLEAVHRGIGYPGPDPQMHSERYSAKTFPSYDFIEVPPEGLELTFDVVVVGSGAGGGVAAAELAKAGKSVLVIEKGHCYAQSELTLDQADAFQKLYENGGSLANHDGAITILAGNTWGGGTTVNWCASLQLPYYVREEWAKLGLPHFVSPAYQQSIDTIIERLHVTDKFIEHNRPNALLLEGCRRLGYPTGNIPQNTGGHKHSCGWCGFGCRFGEKQGTLMTFLVDAKNHGAQFMQDTFVEHVLIQKGKAVGVVAYQNGRKITVHAEKVVVSAGSIHTPAILQRSGLKNKHIGRHLHLHPVNYVFGKFDEKIECYQGSIMTAITTVAENTDGKGYGSKIEVPSNHPALNSVFLKWRNAADHKRRMMEMNHIMPLLVLCRDREGGFISIGSDGLPRINYSLSKHDAVSIEEGIDRCLRILVAAGAKSVWTTHRDLEPFDVNPELGYDDPAFKKYLAQVKKIGVSAHTTNIGSAHQMGTCRMGGSPSKSALKPTGETWEVKNLYVADASAFPTASGVNPMLTTYSLSHSIAQFIKKSYETTSKL
>c647
MAIRGMKTVTHSFVGLLQWGDYLSEGFTQTPDADANHYDFVVVGGGSAGCVVAARLSENPMHRVLLLEAGGNPHPLSIVPLTGSLLHNHPSADWQYATVPLNNSQFPLGDRKLPWPRGKMLGGCSSINYMVYMRGNPKDYDEWANKTCDPRWSYTNVEKYFKKMEDYHGSFNNHENFHSTNGPVTVEPIKYAPGLKNLLQAVKETGYRVRDLNAYQKEGFSPLEVMQKRGRRMSSYTSYIEPILKRKNLKILRYAHVTKIHLDSKLKATGVSFVRNGRTSYVTAKKEVIISAGTINSAQLLLLSGIGPQEHLRSVGIKPLVELPVGKNLQDHVMSHIGPIILNDTSTSFMPFRDLSLKSLVDYYSRGSGPLTSPMGMISVGVTSTSTSAGWPNILYIIGSMGVTYGSGEMADDVYRTGNHFTQLSNTFIGQAAHTAFVALGKPKSRGIIELRDKNPFSKPLIDPKYYSDEGNQDMLDMIEGYETIVKLYEKSDSLGRKLGARIVEIPSCAKYGFKTKAYYECAIRTPILHMFHPVGSCAMGKIGDADSVVDSQLRVIGTKGLRVIDASIMPTITNANTYAPTILIGEVGADLIKSSYVRNLMK
>c648
MAIRTYVIEFFKQLPNHVFKWTFLLKLVIFCPLICITLLFTLWIYLSTETISNLIGFEEAIKYTYDYIIVGGGTSGCILASKLTENPKISVLLIEAGSTFSPLSMIPFLTSQQQRTQNDWKLTTISQKHSSFGFWDQIQFLPRGKGLGGSSQLNYLIHFDGNKKDLERWKEYGIDWWDLNDEEDLEHDKYTGNECSVDTCSINEQIDSKGTHSNLFKTNLPVSAIKYDYSLLSTKFMDGANELHRKNVSNLEYYLAKYNTHKGLRHSVYHTYLKPVFNRPNLRIVLNTRVHKVLFNKKTAVGVLAAEDYLTRTPQKIYAARGVLLASGAFHTPQILKLSGVGPTKELKKFEINVVHNSPMIGRNLYDHMSVPIYVSVDAGEKMTVTRETVLNVWEILNYLVRGSGVFSNFGVIGYVNDLENNHGTGIFGVGTIDEKVLGKIVSYDREAFRANFPFHNDSIQEGFVLLNTCHQPLSRGTVRLSGNRIQDAPEIDPNYLEVQTDVECLIRAIRLSMDLMSTKAFKAVNTKIHWPQFSQCKNLISLNEEDISITDRYLECIIRVGGITAHHPGGSCAIGKAPNSALDSRMQVRGVRKLRVIDASVIPTPVSGHPHSAVAAFAELASKMIFLSTLFEICQVRSRAQHT
>c649
MAIRVMAETKTARAGLCWDFRGLLIRRGIHRRLAGTTAIFPTISRRLKRGAIMSRNEAVDVCIIGAGASGLVAAKELSEAGLSVVILERGPWRQRSDFAPEDEISTKRRHFFWPTVEREPRTWRLNAQSPTEFLSADVQVFSNAMCVGGGTVHYSGLSWRFHESDFRVKSTDGSVAGTSIEDWPISYEDMEPYYEKAEWTIGISGKGWSNPFDPPRRRDYPVPPVARNSAGAILENGCRALGLHPFPTPMAILSRSYDGRPGCVNKGFCSGYGCPVGAKSSALEALLPKALATGRCDIRPLVMAREISVDSGGRAAGVVYIDSAGTEQFQSARLILLAAGGVETPRLLLLSKSSRFPEGVGNSSGLVGKNLMLHAPGPIVIAIFPEAVDGHQGSPCTRVMQDFYKTDSRRGFIRGGFVHPRAHGGDPVDYALQPVHGARWGLKHKDSMRESWRHYLHSHCTGESLPVESNMVDLDPEVKDRFGLPVARITYTSHENDIRLGSFLAKRSREIFEAVKASKVIVPPSRLRKLHNHQMGTCRMGNSPGSSVVDKWCRSHDMPNLFIIDASVFVTSGGLNPALTIEANAFRVCDYIVSEARRGNLG
>c650
MAISDFRTAPADTHIDCDICVVGSGPAGMTIALQFVGTPIRVCMVESGGLTRDTTIETLSAIENVGAHRVPPSETRQRGLGGTSALWSGRCGVFDPIDYRQRAWVQHSGWPISADEIEPYYDRAGRVLGLGPAVYQEAQSKLLNARDLGGAWDALKLRPVIWQFSQHGTATGVPLNDFAVGPSAEGGNIGMLQHSGAPSPRHFGQVAMATLKTADNINVLLHATAVCIETNETAKEVGSVTIASLSGRRGSISARRVVLACGGIDNARLLLCSQTADHRGLGNQHGLVGRFLSDHPFWPIASYSGRGSDALRRRFGAIWYDRHGSRHVYTLGLRLSPEVQRQEQLLNAAVHIVELGTRRPAVTHAGSALRLARQGRYNKEMWGELASALRNPIDLASGAYSRYALGQPPLAHPDVVQFGVGVEQVPDPESRVLLSKERDAAGMHRARLDWRISDREFATARRLAEILKNEFARLGYEPPSFAAWLNSDDGDFRKLIHDMAHPMGTTRMSADANTGVVDANSQVHGVSGLYVAGSSVFTTSGYMNPTLMIVALSLRLADHLKSTLVDSPVSQVSTSTPLKVDNRRLRIGIIGSGNRIRNIYLPILRMLDQDYEIVGITSRSADKAETFAGETNLTAFESPAALVAAQKPDLLIAAVTGIDHVLPGLLDLGTPLFIETPFCWSLRHGRNSLQRIVRSGLTFGVAEQTPYLPIEQLKRLLLDHGLLGTVVSTHNDFAVFDYHGIAALKAHLGREQKPASVSATRVEHPTRRAGAVVNDAWTFGTATCADGCTLVHHYSDQYFMSEFRQPKMLRLYGSSGSVVGDMVSFEGENGVIEHAPIRREMSLGRLQTLTVTTPLGEISWRNPFAQHDLDDESIAVATSLQKMKNAVLFGGVTPYSAEDGYNDMELLAAMRSSALNGGAPVKLPLGKLFTAYNALRERLRRPSR
>c651
MAISKPTRVGVAAAVLWFWLCLFALPVTADNEAAYAGKSATAIRIPQNDSNTCNTVIGGVARVAAVVEAGGFYEQDNGNLCTIPGNALNIPFLDTTPSYPRNPLMDWDYFSVPLTQAGNRVIHYAATAGAYDNWAALVGDSSYTRPNVLPFFKKSATLTAPDFSKRNTPNATFSYDTSVWNNALRGPLQVFWASWQDPTITWLAKGIRSLGLAMRKIGFNSGSLTGSSAYVTTTVRTRDATRSYSRTSYMDTIGVPSGLKVYHHTATRKIPFKGKKASEVVVEIILSAGVFGSPHLLLVSGVGPAATLNPLGIPVVSNLAGAAWGPLSSISAYTSFGKIPTSMRKAFSCATTTALSWFPFDRPEVEYIAEAVALGNATLGLMSSCLTALLSRGSVTIKSADPRVPPVINLGWFTNPADGGVAVAGLKRAREAWSNISSIIVSEEIAPGAAVRSDAQSLQYIKNSATQIWHAGATCSMGKKGDAKAVVNSEAQVFGVSALRVVDASAFPFMVPGHPQATVYMFAESIADAIIRGK
>c652
MAITEIYHTMLFHVLFITLWSCAITSAQTFDYVIVGGGPAGLTVANRLTENSSITVAVIEAGTFPEDVLGNVTQVPGYVGELSSGPEVFDTNIEWGFMTTPQPSKNGTSVIYPRAKTWGGCTSINSMAYARSAIGAYQFWADTVDDQSFTYDNLVSYYKKSMNFTPPDNETRFANTTPSYHVSSTAEGGPLAVSYPSYGTAFSTWVAKGMAALGLPQTFSAIDGILSGSGYLLLTVNHPNGHRASAETQFLRPYLDRPNLFLFNETLAQRIIFNGEKVATGVEVTTASTTYTISAAKEVILSAGVFQSPQLLMVSGVGPAATLEEYDIDVVADRPGVGQGMDDHLFVPVVYPVNLENIAVVTEDVIDEFNNEAIGALTTTGSDYVAFERIPTSLQANWSVETTEFVSSLPADWPTSQYLILPGALAGTPETDIVYSTLMPALIAPQSRGNVSISSSSMSDPPLINPNWLATTADQELILATVKRARQFMTSEAMSGVVIGEELAPGPSVQTDAELLKYIRETFVYMCHAHSTNKMGNSSNPMAVVDTTGKVYGVENLRVIDASIFPFLLPGPAPQTHIYMLAEKLADDIKNDN
>c653
MAIVADLTNTNYNYIIIRGGEAGCVTASRLAEALPDCKIPMIGAGPSDLDNKSILDLRSMDNLMGGEFDYGFKSTEQPNAISSICGPRCSVVVLATMVALLEHDVQKWQEAGAVG
>c654
MAIVEKLDSAGRIFDTCVIGSGPAGLAVALSLEANGCPVLLLEAGGDKRRSQPPPSPEIRIEDPSVHAPLAETTRQRLGGTSSAWGTICVPYDPIDFEHRDWVTSDGWPIPYDEVARWYDEAGAFLGFGPEAGGPFVTDDGLVLGAGRLANRAPLMVRHRDRIRHSRNLTVLTSSPVTDLQLAENGERVHAARVRLRDGTVQEIAARRFIIAGGGLRSTYLLLRLARQWPQHFCAGRAPLGRYYMGHLTGEIAGITFRSPQEARDFLFQADAYGVWTQKRFLLRDECQRETRTLNTAFMLRPPTLSDPGHGSGALSLAYLAARIPGVAPIAKSTRLTLAGQNGTRGALHAHFANALRRPGATAREIGVMGAQSLKARLPILIPTPSGRYSLRFHAEQMPNAESRVLLSDAGDPADPGLDIRFRYRDEDFSSVLATHHALGAALAAGGRAKLDFYQRPEDRIAAIRAQALDGYHQIGTTRMGDNPRESVVDRNCRVHGLDNLFMASSSVFPTSGSANPTFTIVALARRLGDHIARLS
>c655
MAIVTRAGQETASEFDVCIVGAGASGLTIASVLAGKPIRVCVLESGGDRNALGPSELATGECSGLPYAPLDTSRLRGFGGSTRAGGWGGLCKPFDEQDFAYRPWVKDSGWPFGFEHLRPYYERAGETLGTASIDLLRLRDPVFANRSDRLASDNVALCRNLRLGERLRSTIEQSASTTVFLQSTALYLEFDNSRQNVTSVVFDAGGDRTLRITARAYVLAAGGLENARLLLLSEGPTGRQRDLIGRYFMDHPRFSVGTLVPLKKEAFAKLLSFDRIRIARRQRVERLIWPNSRRHYTVKGLALSFDAQREEQLLNHRAWVEPVFPGLGSEALEALKSELLFRRDLGLRGSRKTMVSRTLDDFRALNWAKIMHMARPAGLARSFRLQHIVEPEPCADSAVKLSQVKDRFGLNKIDLHWRISDATLRSLRRTFQILQAEFLAAGAARLVATDDEWEQLERPMWTWHHIGTTRMHEDPHKGVVDAQCKAHSVNNLFVAGSSVFPTAGNDTPTFTAVALSHRLADLLLHVVCGARRSL
>c656
MAKAINRGQRSSSYNQYIKPVQDSRQNLTVHKYSIATQFYERHGIPQIAHASKEVIISSGIFASPLLLMKSGVGPRDQLEAAEIPETGEGILGHLQEGPQAFIVSSRAKQDGQGDWPDVQIIFDPMSPAPQGDEFPRSSFFIFLGRPKSRGSVGLNATAYKGGIRSDDTKLAIINYGIFEGGSETDIEVLLEAIDKYGMSYGGTPHPIVDHLNTFPEIIGGVSLADELVQRYIPWELVVWAQLLIRNSVVDASVFPAVPNSNINGPILMIAEKAVADIFQEW
>c657
MAKDPRKEISFHSRAPKYIIVGAGPAGCALAAALVKGQQGKVVMVERGKEKVHTRFVTKVNDWVKASLRSWNAVQYLSVPHRHLGNRQFVTPRGQGKGGTALINAMQYSRGYRKDYQAWEEWWKMEEIEE
>c658
MAKEFDFIVVGGGTAGNVAAGRLAENSKLSVPAIEAGRGDPEKIEEVMTPAQAFECRNVPNDWKYKPTFIDRPDYTRVEKPNTRGKVLDGSSGLKDFTWVRGSKGTFDNWEAFGGLGWNWEGNNEYFDKASFPLIFVGLLELVVFPRIEDRLNKIIEYVKVKEDKGGKDPSGAAGQPHFEVEFVPIFAEVFQWHFSVPKEGNWLTIVDLMRPVSKPGFVKLQSADPRMDPYININFLEDNPDVISLREGDRFIDDMLMTDYGFEDIVGEDYPSPMPRNLDEAMDKLILERPSGKCRLLKNIKEGVVDGQLKVHRFKNLPDSECCLHGWREGC
>c659
MAKELGARTSLSIVVLERGPSRQPSDYSTDMDELDYAIRLRMMQDLSRETVTLRHDAARRAVPLRQHGAFLPGAGVGGSGEHWNAQVPRFLPDCFELLSKTTQKYGASALPEGHAVRDWGITYDELEPYYTRVDKLLGTSGQAGNIRGKRIGGGNIFEGWRSEGYPTPPTKVPYFAALFRDAAKSLGYHPYPAPSANISQAYTNPDGISRGGCTYCGFCARFGCMVGAKAQPSSLLLPIIQKRQNVSVRTGAWVRRILLDPAPKSAARGVSYVDAAGQEVFQPASLVFLASWTFNNTRLLLLSGIGEPYHPATGRGTLGSNLTHQVTVPSATAFFDRPLNRFMGAGSAGFLLSDYDRDDLDRSSLGFIRGGYFGARGYGFQPIGVFGVLPSSVKATWGSDWKKAAIFYYDRTATIGFAGEHLAYKTNLMDLDPVYKDALGDPLLRLTMDWRDNERKMVGFATPIAVDLARAMGARQINPFPGLGSYDATRYNSTHVQGGTIMGDSPAYSVVSPYLQHWQLPNLFILGGSTFPQNASANPTPTVLAFVYRTADAIVDRYLKHPGPLA
>c660
MAKERFDFIACGAGVSGPVVARQLCDNPDIRVLLVEAGGFDLPAESHDALRWPENIGGSIDWASYPNGSRGWMGAH
>c661
MAKESEPGVHVDYDYVIVGAGSAGCVLANRLSAHPGKRVLLLEAGGYDWHPLIHMPAGIAHLPKQRRLNWNYDTEPEPELRGRRLWWPRGKTLGGSSSINAMCYIRGVPADYDSWADATGDARWSWQQVLPWFLHSEDNTRGASTWHATGGPLSVSDLRYHNPLSAALVDAAASAGFVRNDDFNGADQTGFGFYQVTQRNGARCSASVAFLRPARTRRNLHVRTHALVERVLIEHGRAVGVQLRRGFRHERIHAGEVILAAGAINSPHLLMLSGIGPADHLREHAIEPAIDLPGVGANLQDHLDICTLVGSTQNITYDRINELAAGWRYLRRHDGPATSNVAESGGFVRSRLATDARCDLQFHFVPALLDDHGRHRLPGIGYTLHACYLHPRSRGRLHLRSANPAEPIAIHAGYLSDPEGHDLARMIEGAKISREIFAQPAFDAYRGNSVFPEKAPQTDRDWEDFVRRKAETIYHPVGTCRMGVDEHAVVDSELRVHGVTGLRVVDASVMPALPSGNTNAPTIMIAERAADLIRG
>c662
MAKETVLVVEYGPIVKDDKSLQMPSKGNPFPTQYMFPLRTTPQQALNGRVGDVPASNIAGGGSAINAMFHDRGAKADYDAWAELGNTGWDWNGLLPYFKKAVRFTPPSQAEQQKYGYTYDLSAYGGSGPVDVSYPPFQFPGNKIQFDAWKDLNIKTQKEGANGNAFGVFWVPSSQDPVKETRVDAVIAHYKQRKNYHLLTMHQASKINFVGTAAAGVTVKSRETGKTKYIVAVKEIILAAGAVHTPQLLQLSGIGPKSVLSAAGVTTKVDLEGVGQNLQDHPFFPMAHQFTSNVFPYPELLTENATYRDAAYAEYWATRTGPFALGLGNAGAFVPLLNLTSQYKNIASTLSSQSASTYVDPSTPASVLKGYAAQLKILANRFTRTDNAVMELPFAGQASPVVAFLKPASRGTIKITNSDIGTEPAIDTRTIANPVDLKIMMELLKFARKYFKTPTMSKLGPVELLPGPDVDTDAEIEGIFRAALVQPSFYHVCCTAAMGPRANGGVVGTNLLVHGVSRLSVVDASVMPMVPGTHTCETVYAIAEKAADIIKSRA
>c663
MAKHLSSSGATISLLEAGSYFNRHTYPRKEIDANSQLYWGGGIELNQTANIGFLRPKVVGGGSIVNQALLDRFDHEALSSWKQESNISFFTEEQMKPWYEKAESSVNIQEIPAQYRNANANVFINGFEKLGFKCSPLKRAQSQCQYEKGNDCIECLAGCRLDSKQSTAITALPQALKNGVKLMSQFEVTHFERSGDIYLVHGKSQSGEYKRLRAKKLILASGAIGNSKLLLNSKYANTNKKIGTRFYTHPQFMSLGLYDQEIAAHKGPFQAMKSDEPHFRVNRFKLENVFAPPVGLSMLLPGLGIKHMRAMKKLRHYACVEVAIRDQIPGQIKTTTNGKVQIAKSVSGEDKISYKKGEKVIHEIFKSTGAKEIIDGELSIGLHLMGGLCIGDNASKDIVSPDFSLHDDKNIFCADSSIFPNAPGINPSLTIMALSLMASQSILKQSGHS
>c664
MAKHTQKPVDWYYVRLRSVRTSRRIERVMAPKLITSDGKRSNVADAYLHPCRTRNLTVVTGVTIDKVVFEGTRAIGVQVIGNNQPSASFGTREKYTKIVKAHRTVILTCGALGSPAVLERSGIGNPDVLRAAGVKVKVDLPGVGHDLDDHQLICPMYRATEGYYEPFDQYARGEKSVKGPIDEEYDRTGKGIAASNGFDFGMKIRPTQEEVTSMGPAFERYWKRIGADKPDKPLYSNVILPYFYSYRPPPEGKYFCIGGFHNYPASRGSVHIRSSDPFATPRAVSGFLTRPEDLPVHVWYYKKQREFCRRLPFYEGEEPESHPRFDPKSAARLRTSDDPNRTDKPIEEDTIPYSAEDDKAIEQYVRENVATAYHSIGTCAMRKREAKGVVDARLNVHGVQSLKVADLSICPSNIGSNTTSVVLLIAENAAQIFLEEQGDGSLHASRPRAAKL
>c665
MAKILKKTDVVVIGLGWSSSIVANECAKAGIKVVALERGGHQDTSDFLGAHDEYKYVNNAAMKQDLSKESICVRNNDNEIALPMRKNYAFDVGNNVGGAGVHWNGMSYRFLPYDFQIKSLTEEKYGKNKVSKEYTIQDWGVNYDEMEPYYDKAEKMMGVSGEDKSPFSGKRKNSYPNPPLEKTTMLKKFDEATKKLGYHPCMVPASNSSQTYTNPDKQSLGACQYCAFCEHFGCEYGAKASPIVTTIPSALATKNLDIKTHANVLEILHKDGKATGVKFINTLTLEEFIQPAEVVMLGSYVFNNAKLLMVSNIGEIYNPKTGKGTLGKNYSYQITPSVNGFFKDPFNSYLGAGALCNWIDDFNGDNFDHSKLDFIHGASFRISQNGARPIASNPIKPGTPSWGAEFKKASIYNYTRFTYIGAQGASIPYIGNYLSLDPTYKDAYGLPLIRVTYNFTKQDKNLYNFMLPKLKSIMQEMGAQNIYTSPKLGDYGVVSNGWYTSTHIAGGTIMGTDKSTSVVNPYLQHWDVNNLFVVGAGNFPHNPGYNPTLTLNALAYRASEAIIKYLKTGNC
>c666
MAKKEVFDVCVVGTGAGGGVMIDELTSAGFKVVALERGKMWNNAEFMEHDELSSMVRKHQVWAPDLLETLRETDGEKAIPGQYSMLAHGVGGSSVHWHGAAWRFRPDEMKVLSTEGSLKGANLADWPISYEELEPFYDKAEQAYGVAGNSGSNPWGAPRSVDYPNPPHPYRSGSLAIIDAAKKLGLDPFSTPTAINSRHFGGRPACMNGGMCGYFGCPINAKASSFSVSIPRAQATGNLDLRTHCYAYEIGVDSRGRARSVVYFDQNGDSQEVHARQIIVACHAIGSAHLLQLSQSGKYPGGIANSNGQVGRNIMFHMDSLVQFEMDSPQRGTLGPAGMISIDNFHPSDSSRGFIRGASILELPANSPIVSAFSATAYYGSDHGVWGKPLKDYIERFPYMNGLIAFCEDLPVYSNRVDLDPDVKDRFGIPAPRITHKNHENDIKQRDYFDDKLMMIAEAAGAKHAWKLDLSQHKSGSAHIMGTCRMGDDPDTSVLNRWCQTHEVDNLWVVDSSFFPTSGGYNPTLTIVANAYRIADHFIRQAKNNNLS
>c667
MAKKLKKLEADVIVAGAGPGGCTIAKELSQKGKKVILIEKGVYSKMFYGSLLAPIRYMEKFGFLFRTVEGDWIVQGKGFGGGTLIYAGSAFVPHPGQWQQYGIDFTEELAEAKKDCWVNKTPDDMLGEGPKRLLASAQELGYPWEVIDKFVDLTKCKAECPMCPYGCPRGAKWTGMVFAEEAERNGATILPKVTVRDVIIENGVAGGVRARGSNGQEYEINGKIVVCAAGGIGTARILKRSGFDDAGSWFTGDPAIMVFGYFKKGKGGMRDMLFSVGCHDDEHGVTFANVSGPRMFWGLQRLQEKPQKPVNAIFRWGKAIGVMIKIADELDGQIHLDGRISKPRTKRDMYRLEWGAAAAEKILIKAGCDPYNIDHSGVIVGHPAATVRVGQLVDSNLETSVKNLYCCDTSVIPDAFGVPPTLVIVSLGKRLSKRLETIV
>c668
MAKKRDRRQEVIIVGTGPSGATAALELVKRGKKVLMIETGIEDQLGRGVFHTYKNLYDKHLFFSRSKEGIIIDRALTLGGSSAVFSGNAFRPTKSFQDDLGLDLEPTIQETINELKLAPFSNEFMKGWNGTRRLVEAADTLGINFLPQLKFIDPSRCNPKCDSCMSGCSINARWTARDYVRKAMAWPNGIDLIMNTRVEEVLMDNDKKRAIGVRVSGNKDIPEKLYADMIILAAGGMGSPVILQKSGIEEAGKSFFMDPMDVVVGFTKEKGPWKAMTFTHACEDFEESDHFMIGNVKGEGAWLSQMMRIKPFFKNILKFKKRGLYSMGMFTKIADENKGSIDAKGRMSKPMTDNDMRNMKKGDDLCTRILIKAGCEPDTISISTMIGGHPGGTAAIGTVVDQNFESLKIKNLYVCDTSVFPRSPGSPPVLTLIAMVKKWARELEIA
>c669
MAKKTGTTICGLIYDGGVVLAADTRATAGSFIADKSCFKLHLLLDHIWCAGAGVAADLEHVTMRMAADLRVFQAKLKSLVRVETAVTRLCNHLVQYMGHISVALIIGGINPDSKPSLWYVSAEGHAHQLPYLAMGSGGLFATSVLERKYRKPMPEQEAMDLAADAIEAGVINDLGSGTMVDVVKITIANPKKPVLTRGYRRPVANIPGFSKACNNDFCPEFLPAGYKGISKQYVDHIRTSTFEEIKNVNFDFIIVGGGGTGCPYARKLADEGLNVLIIERGNARIKHVLTHDMYGAGLVIADEAVSQPLKYTCGVKSHAASVLGGGTAIGMGIMILESEPYLNQIEKHGKIKIDRTLFNQSL
>c670
MAKKYDADVVIVGCGCAGGILARELTDAGLHVISLERGPDISSEEYSMDELKFPIRNKVLWGPQDEPRFTWRSDGSNSTERVITGWNGWGPGGDHLHWGAQSWRFQPATFEARSVFGQVENGAIVDWPISYDDLEPYYQRFEERVGISGDHTKDPFHPPRTKPYPMPPTVPSYATRHFVTAAKALGYDPFPVPGAINSTDYDGRFACGYCGFCQSYGCTVEAKGDVGLTEIRKARHNSNFELRFHSRAFEVAVDIHGHAEGVKYFDKNKDVQHVTGRLVIIAANYLESTHLMLLSKSALFPNGIANNGGQVGRYFHMRDITQLIGIFDEPMNSFIGPTPRWAVNKFADDNFSPEEYGEDFVMGGNITGADQHGLAGQPIEFTGAPTPEGIPNWGEAYKKFISKAYTHHYNSRIYLTEPPQDDKHIDLDPNVKDSFGLPVPRVTFDWHHQTSKQHAFLRQRAYEIYEKAGALHIWGGELGDPWVLNSHAGGTTRMGENPEESVVNRYCQTHEVNNLFVVGSSSFPTIGAYNPGETVGALAYWVAEFIKKEAKVGKVFN
>c671
MAKLALYGTPLVAEALSTLVGGSTSNSEMRMRLWSLQTTRCLHYNKFVVFRVSKMYLTHKTERNVTIRVKLDIKMTITGPQITVIPMRGIVSGLTDGGYVDRIKWAESNRTKALAEGVEYTAPDGSVKTLYANEEIIFSAGSVRSSAILELSGVGNPEILEDFKIPVKIFLPSVGENVIDQPNTFIAYASNSTFSGMAPYVTYMTASDILRTEAGTVAAEIAAQLKTWADQVAEASDNALSTSALEHLSNPARSYLCPRRALRRDLNYSARNKPINPNYLMAQWDLILQRKIAQTVARFWKTAPVSSVAGESVQPPGTDLPIDTTEDEWDAWISRSSQTTTFSVRRQCSLRELGGVVDNNLIVYGTENVRGHLASTLCAIAERAAGIIKNKLGKQ
>c672
MAKLNRFISKDKYLKFCELHKLEEFYAVVGSSFAALSLVEGLKSKNIIVFEKGSDFNPSLLRGLRIKNNGTFSLKENSIEESVGGASNTWTGRLSEMNHHEFCGKNKEASKIFYDLSTKYYKKSWEFFGFKEFIQVERNVTEFKERVLPEQKKPLRAEKLLKKNNVHIVIESKITAVGEDKNGSFLVVEFSNAFQEKIYFKKIILANGGLHSPLLLKNSFEKGYLKRNKSEIISKNYMNHPKITFKNFFTSIPSSSPFVFRDKNDSNFYGYSLSDNLQKKYGIKNTYFTFHPISKDEHTKEFIYATDIYFNKFKALKIFAKYLKKYGFNFFSISKIIFHIGCRVGLFKGKIKNYDLEYFCEMAPNVKNKIFVDRGSLTSEVSFSEKDYVNLEILHQKLVSKFSDNVADQYKSINFRDKVFQDSSHHIGGIPMLENLNDSVIDKNLRVVDSENIFLCSSSVFQYSGSSNPTLTIVALGFRLADHLKRIN
>c673
MAKLNRRKFLQSSAAAGVAAASSVASTANAGWFRKTTRSQTKALVIGSGFGGSVATLRLAEAGIQTMLLERGKHWKYEGEGSYPTLAETGSTLKINDTVLWTNPSPLIPGSMGMVEYFVDSSIAVGCGACLGGGSVVYGGVLLQPKREAFEDAMPFLSYTDMDQVYYPRVLNRISGGPIPDDVLNHPNYTAKREFIKSAEDAGLEVVRSHVSFDWDVIREELNGTKPQYASVDEYVFGCNSGAKNTLDRNYLADAEATGNVTINPQHLVTDIQANSGGGYSVTCDMLDEKGKITGKHVIECDYLFMGAGSLHTTRLLLRAKERGDIPGLNDQVGAEWGTNGDELMGRNDIDTSTAPIQGGPPSIAAFDTENPYKLTGYMHSPTSVAKEFTQLQMGMVVPDQNSRVTYNRWTDKIKLNWDRDANENSHNALVHTMEKMVQSGGGKINEAGWFGTWHPLGGVAMGSACDLSGKVYGVEGLYVVDGAAIPGSSGSANPALTIAANAERMMEEIIPQIS
>c674
MAKNGDCEYDVIIVGAGTAGCVLANRLSEHPNISVLVLEAGVDRSDDERVYTPGLTGSTWDDPDFDWQYTSPPEPGFNNRILKHPRGRLVGGTSAINSFALIYPSVAEIDAWAELGDEAWNWQALAPYYRKFQTIVPPSEEARRDLNLAHSDANIRESKGPIQASFPTRATAMQKAWVETFRTLGLNTRNDPLDGHALGGHTSTCHITGVTRERSHAGTAYLKPVLDRSNLTLTTNALVQKLVIERQGSVPIVRGVRYSKDGKHCEVRARKEVVLAAGTFNSPQILELSGIGNPEILKQNGIEVILANPSVGENLQDHIRPGISFEVNDDVPVGMPMSDEEARKLYEKDRSGPWGYLGAFSFSYTPLVPFLDPVEKEQLKTLLDEHLNDDKHFSPFVRKRKAFIRKTIESPHEATATSFMIRNPVIGAPEGNYVTLRSMLSHPLSTGYSHITSADPRAKPEIRFNYYSHPVDLEVHARHMQILTRIAQAEPLASYIKPGGKQAPVEYPADSVESAKELCRAYSSTNYHPCSTCALGEVVDGRLSVNGVKNLRIVDASVIPLIPRGNIITTVYAIAERAADIISEDLHVRRPTPAGCPTSRLLPVVVFPLQQYTAYAASISDPSSFWAQQAKQLTWHTTPSTAFRTQTRNLKSGASHTAWTWFPDGEISTTYNCIDRHVEAGHGDKTAIIWDSPVTNSKQRISYAELQNEVATLAGVLREEGVKKGDVVLVYMPMIPAALIGILATARLGAIHAVVFGGFSAASLAQRIEASEPKVILTASCGIEGGKGPLAYQPMIRGAVEQCPRKPSKVLVWQREQRLWDDVREEDGERDWQRLVKSARDQGLKADNVPWSVNPVMHWMEKTFTAAEARISLTSFIAGTTGLPKGVLREAGGHAVGLNLTIRYVFGIRGPGDVLFTASDIGWVVGHSYIIYAPLLAGATTVLFEGKPVGTPSADTFWRILEEYKVNSFFTAPTALRAIRKEDPANKFFETRGKRGGLKNLRALFLAGERSEPAIVTMYQDLLSKHCVQNACVIDNWWSSESGSPMTSLALLPAVAQRFDDHTFHKPLPIKPGSAGKPAPGFAVQIVDDEGKEVAKGEMGNIVLGLPFAPTGFTTLWRDEERFYKSYLKRFNGRWLDTGDAGMIDSDGYVHVMSRADDIINVAAHRLSTGAIEQAISSHPSITEAAVVGIPDEMKGHVPFAFIAIPDPPPDLLKDLNARLRHSIGPIASLGGFIASPGIIPKTRSGKTLRRTLKEALENGAKGEFEKDPSYPSTIEDPAVVGKAKEAIKEYFSSGAGAKVKARL
>c675
MAKPDFSSSGDVSADVVVVGSGVVGGMVANELAAAGHSVLILEAGLRLKRAEYVENWRNMSFHNRLHSDFQGLYPQSPLAQAPLYFPPNDYVGLSGPNGSAFKQGYLRTVGGTTWHWAASCWRHLPSDFEMKTRYGVGRDWAISYNELEPFYCRAEEEMGVSGPHDKSLQSPPERSRPYPRDMIPFGYGDRRVAEIVNPHGFHLVPIPQGRSIEPYGERPACCGNNNCQPICPIGAMYNGIQHIEKAESKGAVTIAEAVVYRIDTDENNRVTAVHWYDAHRQSHKATGKTFVLACNGIETPRLLLLAANERNPNGIANSSDQVGRNMMDHSGVHASFLANEPLWFGRGPAQSSCIVGPRDGDFRREYSANKMILNNISRVAPATEQALKLGLVGKELDDEIRRRAACGVDLSISLEPLPDPENRLTLSKTRKDPLGLACPDIHYDVGDYVRKGLDAVNTQVKQIAGLLGGTELRITTDYNANNHIMGGTIMGRDPKDSVVDGDCRSHDHPNLWLPGGGAMPSASVVNTTLSMAALGLKAADSIKAAFARGQA
>c676
MAKQLGNVSQACKMMGYSRDSFYRFKELYEKGGEMALQEMRRQGRPPLKNRVGPAIEEVAVELAIEQPAWGQARAVGHAQAFFRTRDDHALPTIQTILVPAAYQMETLQDGLRLHPKPGMSLATCLLHPRQRGRITLRSSDPMDHPVIEHQLLGDDQDVAELVAGCREAMRILDTPPLADMLTGMIAPAARPETDADWMAYLRSAAFRGDHPVGTCRMGEDADAVVDTRLRVRGLEGLRVVDASIMPVVTSGNTNAVVIMIAEKAAAMIKDDHRR
>c677
MAKRILFDDSKNATGVVADFQNTEFTVSARKEIIISTGAFHSPQMLMVSGIGPAQTLKKHDISVLIDLPGVGQNLWDHVLFSLSYPVNMDTVTRFVVDPQYQTEQILRYMAYNTGVPAQVIDMLGWEKVPFPYRKKFPPAVQADLAQFPTDWPEVEIIGANFFVSNFSNMTAQQPTDGRSYASIVGALVVPTSSGDVTIRSKSTKDLPVINPNWLTTQTDIHVAIATFQRIRDLWRTGLLKKIVIGPEAYPGEQVVTDAQILHAIRDAATPIWHPAGTCKMGTSDDPRAVLDSSARVFGVGRLRVVDASAFPLLPPGHPQSTVYMLAEKIVAQIIAEASSSRSQEEATLPNRGILQESVTLEGLIPCNSSHGHHYTNHTLSFGYSPTGLMDSPGSPDYKALFEQEREKRKHFEDQQKQTTLVEFLRHCHKVLSRPLRVRTPSSSTTGEIPIPKGKHCPTRLERWVDCAAKQQDIYNAVRRYLQPEDAPRLFPSRVVLDGLSEHFKGPMGSEYDLQTYERLTVEDHTRILFSELCKIPAARDEFGLGDGVLFDSHASVLTETEINETYTKDTTPRGKPDQLFVHRVDDRTATLLTTVEYKPPHKLPLGDIRRGLRDMDLWKEMVWSNKVPRDGAESSVYNSQRLVCSAIVQEYHVMIQEGLEFSYLTTGLALILLWVPYDKPSTLRYYFCEPNQEVDNSDGDLPHPNTSIARVLCLCLMSFRSRLRNQEWRNKYCSDLRVWTTRFDGVCENVRSQQLQQGSVAPSDGTDYVSPISAANSSEYQASSSPVESPTAPARRVPTRSRGGCAPSDLGDHTGSPDSSGSESDHAASGRKRGFSQVEASPSQRLPRQNERDNQNDMSQRQNAQFCTQRCLLGLQNGRALDDSCPNVDLHRQSGDGVQHPINATDLVFLLKQQMDENIDRCIPFGSCGSYGAPFKLTCSPYGYTVVGKGTTSGLWKKVVSREAEIYHILRKAQGSAVPVFLGTIDLAKIYYLHQAGEIRHMLVMGWAGESTAKHEQTAELHREIKRSKEKIRTLGVRHLDLRPDNILWNAELGRALIIDFHRSELDYRPTIDRFGSLKGSQCKAPMSETKRVRVI
>c678
MAKRILFDVIDRATGVRLDTAGLSYEISAAKEVIVSVGVFGSPQLLQASSIGPTKLLSQHGFPVVVDRPGVGEGMQNHFYFTIECISAAGFVGYQDSTTAAPTDGQNYASLDTSVNPAINPNFLPDPVDIEFRIGEQYFPGNGTQTDDEIKASIREEYNTTLHGS
>c679
MAKRKPGSDIVIVGGGVAGLYAARCLADDFGFTVTLVEAGSANPHKPGVAPGAWQAAAGESAPGLPVHLSAEGEDTAPFGVHTASGLGGGLSQSGQDYLVGQRQDYFSWSHYIGTGREWSYIDLLPHLKSVETNRVLANSYHGAKGPIAVDLPGYLYPGTREFLLAAQSRGHGVNPDFNGEIQMGSGLVPQMRAKSADRPERFDPVEMVAGLADKKGPVHIVTDAVVTGLTFEGNRVTGVEYRKKGKGRSREIVAEREVLLAAGAIANAKLMLLSGIGPGDELKQIGVAPRVELKGVGDNLQIHPMIPLVTRALDGVPHVDPVKAAKSWRDRLNYRWFGGGPLSVAGDEAAVFFDPLGNERPGMEMRFAPFLHRALAGSGVARDGAMSLMVSLLRPRARGRVQLSHSDPARPARITYDALGNETDAKLLIAGLKRAREIFLADPLASLVEPDFALGPENWHEDSEIAEYCRAQLRFTGMPAGTARMGPDHDPLAVLDPQLRVRGTEGLRVIDASAMPFLTSGAGVVPALAIAGRAAQVIARAHGRETRKPVEEPTKPAPKRSETPPPAKPRDTGTGSTRPSLKRRFGNLGKASATTTSAAAAAAAADTAPPDTPNPDKPPVEKPAAPGTAIPAQPAAEKPGPEEAAKVETGKAPASSETTADAARTEPVFEGEETRVTASEEPAPIEVTAAEPAADAPSVAIAGESPDADSAPRVEGETRDKPGEDHTPSADAGEKPSPETHTEETPTAKLAQDPAAQDPAVRDPAVEVPAIEEPATEESEAKESEAEESAVDAPVDSAPASAPADQGEHEAEELASLPPETTAHEEKAEWNKPAAQPEPPQEPAAASDEPPASDASDETRDAEERVSLPPEMTPHDELEALVAKAALRNVQKDVPDAVSTTAPAASPETPAASETPEPSEEPAAPVAAEDEAPAEPAAPPESEAPAQETVGGTSAMTEVSQEPETPQEPEAEAESPAEPETAEAPPSIHASPSAEAAETAQTEATAPETVTEEPAQAHEADTEPTPEQRDEREDEPEELVGAKDIANSTDAGEPTEQSESEKTAESQDTPDSQDTSESQEKSETQEPPKSEDDPEPEAEQKPKRPIPDELF
>c680
MAKRYDVVIVGGGASGCALAARLSENPEIAVLLIEAGSVPGAGDAPAKNPHPPGSLRSVGSGHELNWDYPTSLLKGRDWRVARGRALGGSMAINGGYFVRAHPGDFADWAAASGDDPHDSRWSYSNALPILRALETDLDYPDSNLHGETGPMQIARAWTQSPRDGASGPLDEAFLAAALSGGAVWEQDKNAGGTPGIGPVPMNSIQGVRLHPGVQYVAPARMRPNLEVRGNSHALRLRFQGQRVVGVDVRTVTGGSSAAGVETIACGEVVLAAGAIATPQLLLLSGIGPAEQLRRHGLQVRAELPGVGQGVSEHPDINLPLLVRPGVEQTDATTAFTLSWNFSASPRSASLPERQPRHRADLYPAERGDIELLLTSLPHSHLFGIETEVARHTYSLMIGLQRAESRGRISLRSNNPFTPPDIDYRFLTAEEDLARLRIGMRTAVNVLDAEPVRGLLADSARQDLGALVEDAETWSTWLRANIGLRFHTCGSARMGPESRADTVTNSVGMVHGVEGLRVADLSLLPSTPSRGPANTAVFIGEMIARAMS
>c681
MAKTLPAVDVAIVGGGWTGAIIGKELAAVGQRVVVLERGEPRWPSPDFQGPYVHDELKYTRRHELHQNAATETFTFRNNTDQKALPMRRWQFAYPGTHLGGAGNHWSGAYYRFDPTDFRLRSHYTERYGAKIFDPELTCQDWPLTYDELEPYFDRYDYLIGASGQAGNIKGQKQEGGNPFEPWRSRPYPNPPMKVPYAPALFGEAARQLGYHPYVQPSALCTRPYVNSEGLHMSACVYCGFCSNFGCEHFAKASPQVCILPVALKLPTFEIRTGAHVLRVELTPDKKRARGVTYVDAAGAEIFQPAEIVVLCAFGINNVRLLLLSGIGQPYDPVTDKGVVGRNYTHQTTSGVNLFFDESVNINPFMGAGAVAVTMDDFSADNFDHGPHGFVGGGYLQIQVVSGAPIGFHPTPKGTPAWGAEWKKAVKRYYNHAANITITGSAQPWRGGYLSLDPTYKDAWGLPLLRVTYDFPDNDIRMSAFLTERGDEIGRAMKGVTRTEPGPRKRPFSATAYQSTHLTGGAAMGNDPATSVVNRYGQSWDVPNVFVTGAALFPQNSGYNPTGTVGATAYWIVEKIKADYLRSPGRLVSS
>c682
MAKTYDYIIVGAGSAGCVLAHRLSADPNCRVLLLEAGPRDWNPFIHMPAGLAKLVNFTSLNWNYQTEPEPQLNNRRLYWPRGRVLGGSSSINAMCFIRGHRSDYDDWAEAGNPGWSFDEVLPYFIRSQNQARGESELHGVGGPLSVEDLSYFNPLSEVFIRAAEQAGFAVNRDFNGPTQRGFGLYQVTQRGGRRCSTAVGYLRPARSRPNLTVLTGALTLNVELDGQRATGVRYQRRGMTHIARARAEVLLAGGAINSPQLLMLSGIGPAAELERAGIKVRHALDGVGANLQDHLDICTLTRCSQPITYDQLSELRVGLKYFLYHEGEGTSNIAEGGGFLVSGRGRDDRPDVQMHFVPALLDDHGRNRLPGDGYTLHACPLRPASRGRIGLHSDDPRRPPAIQPQYLSAPEDLEMMLECVRLSREVLNQPAFKPFRGHEIYPGNEVTTRAGLIDFIRAKAESIYHPVGTCRMGSDEHAVVDPELRVRGIEGLRVIDASVMPSLVGGNTNAPTVMIAEKACDLILGEALAKPVPKTAEAA
>c683
MAKVLSSLDVAATGLRTRVLVIGAGPLGITTSIGLSRRGIPHLLVDSGGSVPGDAQELCDGEVTGGRYPDLVETRVRALGGTTHVWGGHSHPLRPIDFQPRPWLGLKGWPISHDEFRPWFGEVAPLFLIKDEWSADSVRNAPARITDINVPFFSMEAYRLTPRSGANIPPPGDFWSVNGHAVKGDVITGLTARALDLDGDGRVTGVRFSLPDGRSLAISADHVVLAMGGIETARFLLINQARGPSGPLSALPLIGKGFMEHPHPHMADVFLFRPLPGPFRRKNEDDGSSSRLVFFATPEIQEQRKLTSFYFRLDPYRGSAGWFGDDLRKVQMVGLFEQLPDDRRHVTLSRTKTDALGDPLTVLNYFATHEDHEAVNDAVDLAARALAIAGYGRTRLRMRRTSAQEPVAELPWIGVGHHHMGTVRMGRSPADGVVDANLRVFGTPNLYLATTGVFPTSSCVNPTMNGAAFAMRLAEHLARLES
>c684
MALALVAVFSILAATYALPSWQNAEIKRHATDVSQEYDYIVVGGGTAGLTVANRLSEDGKPVGAYPDYQYATQKNHWVAWVEKDDVPIQKEHANGNAYGVFWIPTSMDPARAYNRSFSGLGHYIEVQPRKNYHLLTLHRVIKVNFVDQDDKKQAVSVDIKDRYSSKNFTVKAKREIILSASATRTPLLLQYSGIGPRKVLDAAKIDTLIDLPGVGWNLQDHSFALSLYNFTTDSSFPKPTTIASNTTYKAEAYDIFKQTNGGPYTAVVTVSGAFLPPSSFVGDHFDKMVEEIATQKPYAYLPDDTPKELIAGYEKQKEILLASFKSKTNAWLEHPFAGKGWGMCILLKPFSRGSVNINSDDPLGDPIFDYRIWSNPIDKKMHIRMQAYIRRHFLESEAFNDFNVVEQDLAPGAVTDDAGWEGWLLNQDKLMASNGHSVGTAAMMPQELVGVVDNQLKVYGTLGLSIADTSIIPLIRAYPYADDCVCYWREGC
>c685
MALAMHSMVVLAAFGATGLVDAVQTYDYIIVGGGATGFVVAKRLTEDYNKTVLIIENGALDNGTRSSIPGNSEGLSPAAMYDIYSAPGLNLGNKSFLVTVCNVVGGGPYVNGMQWDRGSDADYNAWTEVGNEGWDWKGLEPYLAKSTRFDPPSEETTREFGITYDEKAYGNGPLNVSIPDYQFPDMKAIFHSWDNVTFDNSSADVLTATGVKYMPRGSQQQMQAVARKEVILAAGGVFTPHLLMYSGIGPRDVLEAAGISVKRDLAAVGSNFQGYIASYMNFTLQNLAPESLEALNANATFNQTSYEEYVQYKTGPYSTGKSNVLVFMALQHFDPAINGTVSKIRTQNVSELLPERYSKNEALLTGYIKQRDIMVEHYFASDAAVGEITMQF
>c686
MALARGPAADYDEWVKMVGDDGWKWENIFPLMKQVQVHVYCREQTVLCAGTFGSPRILLLSGLGPKDTLERLNIPVQVDLLGLLPTSVPRSLSTLIDLRPNSKPKRNCSEFSNIGLCSHR
>c687
MALASQFEGTPHRICIIESGGLTYEHWRQRLSRGRSVGRPYEALDLCRIRQFGGSTGRAGWGGWCKMLDHADFEPRSWIPMSGWPVDRDSLLPHYETAAGLLGIDDLQAEWPASAALPMTGPLFSERCFLSPIPDLGATLRARLQRAKNVQVFLHATALRLDTDSSGRWVRSIEVASTPNRRFRIQARSFVLACGGIENARLLLVSNRQTPNGIGNQHDLVGRYFMEHPRVKWGSLQVGHPDTALALHVPSIVARRPYLSEQEHCGVSGAFGLALRPEIRESERLLGSRTWIKPGPCANDLGGSEALHYLAFWLRKGRLHRDLIKSGRTILRHPAASVASAIERLGHSRGRVRHFHFDTILEQEPDPESRVTLDTRLDEFNLPRVKLEWRVGPLVRRTLERMQTIITEEMRLLGHRSDVQLSAHETPTCGDDIPYRWVRHHMGTTRMSADPRTGVVDATCQVHGLGNLFVAGSSVFPTGGNDMPTLTIVALAIKLGRHLRQWLE
>c688
MALDFDYIIVGGGTAGCVLASRLSEYLPDASILLIEAGIEHDPRVKPTLGLTGQAANEIKWNIQSAPQSAVGNKTIDLVQGKVLGGTSGINHQVWSRGAAGDFNRWAAEVGDPRWSWNGQLPFFKNTETFHPGADLQGKDLSALHGFDGPIKVSQTSSCGRPRNYPLKGAIASMYKSAGVSQGEDLNSGNILGFSEATAGSYDGIRQWAGGNYKFGPNVTLWTETHVSKIISQGSRATGVEYLRPDRSTSSSVSAKKEVIVSSGAQGSPKLLLLSGIGPSAELQKHSIQQVVELPVGENYSDHPMMATYWNLEKRGLALGDVEMRSAECDWTSGLPVDWLAFHRHDQDPTIAALAESQLSSNELERFQEQNRAHTESVVLYGHIDFSGKAGPPPPGSNVCVMNILVTPSSRGTVTLKSTNPFDAPVCDPNMLSNELDKQLLWSVTRLTSQGLERTISPEYGLSEYAIDDDLRGDYGDEAMMRRAVRIVRTVNHGSGTCSMGTVVDTECRVKGVEGLRVVDSSVIPLPLCAHYQASVYALAEQDQTEQFLLLYGDQTVEKLPAVRALVEHAQRSPAGRRFLRDACDIIQIEIFSLDTDERAHVGHFDTLLQLAESNAQADQPSEIVATILMNVTRLGEFILYAEEHPNVLGSIEQPTHIVAFCTGEIPAAVAAAARDSIELYNLSIETVRIICRFARNIIRRSVLVDRTNGSWATTIVGVSPGRVQTILDTFHQSQNIAPTRQINIGIMAAGWLTLFGPPITTEQLFNWSKELDGASRIKTDAGGGVHLPNLPELDLDEVVGLSPLLDVPITPKARLWSPYSCEIRNAATLRDLIRQVIPDITQYSLRLSDTIETAVKGLSNGSVKVVCVGYTAHLISLQKSLQRERREATVLQHSSAGSTFFTSPRGGSESIAIVGMSGRFPGSDNIQEYWQSLLDGERHIKEIPKNRFDLSKWYDETGKQKNATMNRSGAFLDRPGYFDNRLFNMSPREALQTDPLHRMFLTVSYEALEMAGYSPEATLATNSNRIATYFGQTSDDWRDIVLTQGVDIYYAPGICRAFAPGRLNYHFKWGGPSYSVDAACASSIATISLACSALLARECDTALAGGGSILDSPAPFAGLSRGGFLSPEKGCETFHDDADGYVRGEGVGVVVLKRLEDAVADNDNILGVIRGSARNYSKGASSITHPSSEAQQRLYRQVLNQNAIDAASVSYVEMHGTGTQAGDSTEMSSVLSTFGQSRSKDNPLVVGAVKANIGHGEAAAGVCALIKTLMMFQKHTIPPQPGMPFKLNHHFPDLEKMNVHIPATAIPLTSASNAAKRRIFLNSFDASGGNSCLLLEEAPLKHSKASDPRNHHVVTFSARTPFSLRAIKEKYLQYIRLNPNTSLADLAYTTTARRMHQSSARSTFTATSIEDFANKLETDLKKEDSPVKKSKGASSGPNVVFAFTGQGSQYAGMAHQLWHDSAVFRRLIDSIQSIATALDLPKFVDLIASQSFDLSKASPIQTQLAIVALEIGLAQLWASWGVQPSLVIGHSLGEYAALCISGVLTVSDTLYLVGKRAMMLVESVAQNEYAMLAINDEVDIIRQRLATDAYNTCEIACINAPKSTVVSGALSEIKIMQKELEEQGYRSTLLHVPFGFHSKQMDPILDSYESCVQGVGISSPRVPIASTLLGDIIQDKSTVSSVYLRRQTRESVNFVGALQAAQVSNFLRDDTLFLEMGPDPVCMSLVRSTLGTIATPRLLPALRRNENNWLTTSNTLAAVHQAGVPVNWPDYHREFTNCLTLLDLPTYVFDEKEFWTSYPDPEQLSGVEQKHLSPPPVPAVQGFPTTTLQRLTQEAFEDGKISVTFESSTSDPHLFEAIMGHAVAGVTICSSSIFSDMALSAARYTCERLQPGRWSEELLTISGLDIQRPIVVLDRKDSHIIQINAKLDAKTEEVYISFQDQVGKPIGSCKISFHDAASWKQNISRILYLVSFRIDVLKEATITGQGHRFLRPVIYRLFSNVVNYGERFQGLEEVFLDSECNDVVGQVRLPDLPSSKSGHFLYSPYLLDAVVHVAGFLVNCGLKYPEDIGFLASSFESWHILKPILPNKTYTSYSHMEESSNGSSLLGDVYVFDGKDLVGSLTGLRFQKMKKIALTRILQSAAPHSSMKIGAGVFRPDLLGSSEKQSSRNKQLARDVDFDTLPSSVEPSAFTTPKPSSSVTSIIGHDEPGVGDKFLAAVAAEVGCEISDLEPDTVFGDLGVDSLMAITVIASIRNDTGVELPGSFFLDNPTVAEATKALRGDSDAGISTPQSSPPNLSPKIRGEEVNGESSVPFEPLETTPSITTDFEVGRATETPLLIDKPAATLLLQGSVASTEPPLFLLADGTGSVSSYIQLPALSGGRRIYGVESPFARDPSAFVDISVGDLADAFIFSIRKVQPVGPYVIGGSSLGAIHAFEVSHRLLNAGETVSELLLIANAAPIPAPAHLRHLEISTEMIEKSGIAYGTGRKKLSTLSARQKQHLTASVRSHVLYEPQAFTETHRPVHTTLIVASKGLGGGTSSPECPLTPWIQANWGSSETLGWDGLVGEIHSIHREDTDSFSLLKYPNITKLGQIINDRVCHA
>c689
MALDISFRAALTFVVLFASRTTHWMTELKTHDIPAREIFPGNDSTTKTYDFIIVGAGTAGCVVASRLAQNNPDWKILLLEAGSSEEFSHSFPFKHVAKIAKTPLDWNFTTLPLPYSGVKDHIEAGRVIGGSSSTNAMVYIRGNPEDFDGWARNGATGWSWADVLPYFIKSENNNNPELRKSKLHGTSGPMHTIDNPNGGIHLQDLLLAAAKEDGFYNADSNGESQLGWAPIQLNSFEGYRWSTANAYLRPSVRKNLPNLHVVSDAEVTRIVIDSATKTATGVEFAVQHEGLTGAPRKVVANARKEVVVSSGAINSPKLLLLSGIGPKAELDKHNITQLADLPVGLNLHDHYMLQMQFSTNDSRIGRHFPQPTEMSEVQEYATKGTGILAASPILVYGFFHLPNQAKLDGTPDTQPHVQASIANIAVAPGQSEFMLSPLLLRPRSTGRITLTDGISSSPPIIDHQILAENVDIEVYAEGWQFIVNYFVKSESFKQVNLQPIYPQPSNCSGLVNGSIEYYRCAVKQLTRSAWHPAGTCRMGNLTDERTVVDPTLRVKGIKGLRVADASVMPSPTSGNTHAPIVMVGEKAADMIIDSWKSNPSTSGSPTSRSTLCWASILHMTLLAIFTSS
>c690
MALDLKTKLDKELKDDAEIRNLWLEGIHNRDHRQTFKKINEFYDFIIVGAGTAGCVLARELIYNIPNINILVLEAGPPNIQVNDIMRSPCAYPSVSRTIETDWGYYTENQKMPGIVDPTKEVLNKGINYSRGKVIGGCSTVNAMIYTRGQKADYDLWAAQGPEYKIWDYDHCLEAYKAVENNTRKSPDEEFKKYHGFNGLLYVQDGQNDFDDIIKDVIKVVKNLGIPYNNDFNGVRQNGVGRYQHTMKDGKRFSLADGYLTDALKKVETYPPSKPFDIGSPHGLSDNAAKFVAVNVKSFAHMLNIIWDEEKKDENVAIGVKYFYDGRVHKSFIAPKGEVIICGGAFNSPQILMLSGIGPKNNLEENNIKVRKELPVGRNLFDHPSCCITAKVSVPNSTSTSQLHYSSSGLELGMFYKGDIKGKVPSQEHFLDERPDIQFHASTNLLDPVARANAKSGKKNDVLTLVSTLNLPSSVGHLELRSSNPFIHPKIFLNYYEKPDDLYLMMSSLKLSREIFKQPPLSTVWGVESDVDKEMSDEDWEHYIRKKAFSSSHACGTVKMAPESKGGCVNHRLQVYGTKNLRVVDASIFPTIPAGNLNAPTAVVAWKASRLIEEDYKNKA
>c691
MALDRFDYIIIGAGSAGCVLANRLSADPKNRVLLLEAGVKDNSIMVQMPAGVGGLIGDKGTYNWGFWTEAEPHLNDRKMWWPRGKGWGGSSSINGMIYIRGHARDYDQWRQMGLEGWAYKDVLPYFKRSESLEGGGDAWHGGEGPLKVSKAPTPNPIYKATIEAGRQAGYKITSDFNGFQQEGWGPYQLTIHKGERWSAAKGYLHPVLTRSNLTCLTGVRTTRILIENGVAVGVEYADETTKARTVVHADREVLVCAGAVQSPQILQLSGIGDPEELGKHGIAVVHPLKGVGANLQDHLDVTLSWECPKPITIYSQRKGLVKTMLVGLNWLLFRKGVGATQALESGAFLKSRPDLDRPDLQVHCVLAVMQNHGKTQVEKDGFTFHVCQLRPESRGRVGLKSADPFDDPAIFANYLSAEEDRRALREGAKMMRQVAAQAALDEFRTEELFPGKDVQTDEELDTWIRANSETIYHPVGTCRMGPVGDPMAVVDPELRVQGLKGLRVIDASVMPSLIGGNTNAPTIMIAEKASDLILGLAALPADDAPVYDETAAA
>c692
MALENDQNPGVVDDELRVYGVQGLRVYNCDTSIFPQIVSGHLQAPAVMVAEKCADLMINRIEIKSFDDGYGVVNVHLEFGIKVNGDGDHGSEDRSPRRNAVVKLLVVVPLPMIYA
>c693
MALEPVEAALQTPAQGASCRAMMEYGGMRTFGHCGRVDSPGLRMSQSVPLDPAAALCLVSCALQAGVTSGLPDAECWQDDFNEDFCCGDRWGLTGNPACWNEEFTYLRCCGIDKLPRRPDDDTKWEASTAGIELEDGGEYDFIVVGAGSAGSAVASRLAAADTVDGQPWRVLILEAGSWSVAEEVADPDRSAQKKEAWWPALEVNWSVGREGRTWTYATGRGVGGTASVNSMIYTRGSIFEYEAFGWSVDEVLSAFKNLEAPMEAPGFKPDPHYHRPLPTGGLEDLGSNLPGSHLTLVSAFPEELPPLFRSLIAAFEGIRVPFRVDPHGNATNQGIGGMWRSMGCGHPRCQPTRISRVTAARGRPRSTTYKDLAAPFHGSPAHRLETLTHAFAERISFDGNQAVGVEISVTSDDAPQVVQRRLRIRAKHEVIIAAGVLATPKLLTLSGVAEPKELARLGVPVIASSPSVGRHFHEHVGLSIVAHTNVPCPEGYHLSEDGHTTTHLGNTDQFIGQLYAFLNATDNRPGEPGPVDAEVMLLEGCLEGHLSLTFTIILLQARTRGRLVVQSRHPMASPHLDYKPLSNSDDIQVIANTIRLLYQGVFASEQMAPFELGISPGVEVVADFQKLAQWIRANIYYYSHPTGLGADPDASEMDLRQCFLRKAVEVHPATLRNCKQVVDVCRRTWVCEKSVNQVDEQSDAKRHVLPDSQVTPTTVACGMAVSAGLLAAGCVASAAGYPALGMALINVLSSIPGDDIQAALCSNSSTSKTNHNRNIFYSRAPGQSVNHDGPESTAVVSCRHYGSGHFRPHRPVNGAFHNEILQLKVGEAGTYGSYGLPRVLHGRDKWDSTRIGRYFSFNSDIYMPDLSTCGVRRCRFRDTSHANRNKVFDVRTPNVPVSSRVGQRYGRRTPSSYASSSDWWPGDILFLDWEAADASDSEDLLDSDEEDSRVILPGDTIRVVALQGASGRLGQVLKAPTHSGGNFQVQLFPPPIRRSSARLVSVKKENLQLANVAREHMSPDLL
>c694
MALFSSSISQLKAHYDVIIIGSGYGGSVNASRLARASKSDGSKVRVCVLERGREIPSGEFPNSVSSALSTLQMDSPVGHVGQRDALYHIRYQDDISVFSGCALGGTSQVNASVSLRADERLFTKKMGWPLALVDDLHGGLAKGFERALEMLKPSTYPKNLPNLYKHNSLQNSASKLGEAGKWKFTPINVSFDDGVNHVGVKQTACNGCGDCVSGCNFGSKNTLTKNYIPDARSHGAEIYCSLDVRYVLPKSNCWAVYYQPIGCHRDKFNAPLQFITADVVIVSAGTLGTNELLLRSRIKGLTISSKLGKGFTGNGDVLAFGYNMDKIINGIGAGKRDMSVNDKPCGPCITSAIDLRDTGDVQQGMIIEEGSLPGALAPTLPAAFSVAAALSGVDTDRGFWDRIKEKARELESKFITSAYGGAIANTQTYLVMSHDNSNGCIELDPSEETIIFKCSNLAKKPLLKAIEQNLKTATSADGGTYVPNPLFTELFDFNLITVHPLGGCASADNALEGVVDHMGRVFNSNTGQEVHNGLYVSDGSIMPRSLGVNPLLTITALAERNVALLAEERNWIIDYGMDEGPAKFDGERDELDKCALQFTEKMSGHVSDYKLNDYKEAERHGEEKNLSASFVLTIHSTDLDLMLKEHSHTAGLFGTVSIPVLSSEPMSTSDGHFNLFRPTSNHSKQMRYSMRLHSVEGTNYYMEGFKDIRDDPGFDIWDDTTTLYITVWKGGDKSGNVVVKGILHITKGNLKRQITTIEAKRPGKGVSVTDICKFGKFFLCELWDIYGVNGNRRPRN
>c695
MALGLRFFVIALAASSTLTAAVLQSYDYIVIGAGTAGATIAARIVEDPSVTVAVLEASDSSAENNPLAFIPGADTISIGSSPLDTVSYDWNFVTIPQTGAANRKMHYARGKGIGGTLQHNFMIYQRPTSDSFSYWINATNGTDFLPGWSWNDVYPYFIKSIILSPPDNSLHRAAATLKYNSIPAAYPETDNTKVPLPIGFANFAFEYSATLQSAFNELQYPNALDFSSSTLNGVQYDTSTLDHSNGHCSSSQYFINNAQKLSNLHIITNTMAQKINFDSNKTAISVTYTSLLSTVMINVTREVIVSAGVFQSPQLLMLSGIGPSAQLQKFNIPVLVDLPGVGQNLQDHVFFSPGYEINPSIYQFGHETQILNLLVADFLGWQKLNETFISTKPELSVLSTYPPLWPHIEYISAGGLIGKFTDLLVANAAPALINKFYYLLLGALVAPQSRRSVTLASNSASTLPVIDLQQTKQFQLRCSGRSAEFSIPLHLCRSEITARNSSQSTDAQLLSVIQNSLQSVWHASCTCAMQPRSNNGVLDPYLRAYGVNGVHVVDASSFPSLLPGHPQSVVYMLAERAAVMRPLTG
>c696
MALISTSFIHCHPSWDALGLCPAQSSQFPFHLFGSMCWCPKTTPKYSSFSPELRYVNRTQKEQDYDYDYDYIVVGSGAGGLVLADRLSETGARTLLLERGPESTWKSGGRSGPSWANPLNLTRHDLPSASNSIWVSSPISRCDDYSELAACLLGGGTAINAGLFLAPPDGDWIGWPKGWGMEDMGNARERVLGRVPGWKTDTFGEGWEVLKEVMGREGWKEVDANGERNRKDRAVSRGIFMFTNGTRHGPLGSYFLSSLTRHNFHLQLNTPALRLLRSVGYSRSRINGVVTPRGTITAKKVILASGTFGTAKILLQSGIGPLPQLQTILSSSNGRYLPPKDDWILLPVGKNLMDHYNLDMTISHPKFRGYDFQAAYSDPPLQDLKLYLANRTGPLAESVPAPNVIMWLETTVGNHTMNGQFTTRISSHPNDTSLGISFFLGRGSTSRGEVEITQDGRMVVTKYPWAVTEEDKEATEKMMEEFLGVMERAKGLGVETVKPAKGQDFRSFVGEEREGRGSNHWMGTARIGEDDGRKYKGEEGDVVDPRGRVWGTENLFVADASLFPVQTTGNPTAAIIVVAERIAELVLGAEIRTHAT
>c697
MALKLFLFALLLCLPTSLSSTASKGKEKKSKFNPYRYTFIDKASTFSSSSSSSFSSNGQDSSYDYIVIGGGTAGCPLAATLSQNFSVLVLERGGVPFTNANVSFLRNFHIGLADISASSASQAFVSTDGVYNARARVLGGGSCINAGFYSRADAAFVKRAGWDPKLVKESYPWVEREIVHQPKLTLWQKALRDSLLEVGVRPFNGFTYDHVSGTKIGGTIFDRFGRRHTAAELLAYANPQKLRVLIYATVQKIVFDTSGTRPRVTGVIFKDEKGNQHQALLSNRKGSEVILSSGAIGSPQMLMLSGIGPKKELQRLKIPVVLENEHVGKGMADNPMNTILVPSKAPIEQSLIQTVGITKMGVYVEASTGFGQSPESIHTHYGIMSNKNELFSTIPAKQRRPEATQAYITRNKYQLHEAFNGSFILEKLAYPISRGHLSLVNTNVDDNPSVTFNYFKHPVDLQRCVEAIRLVSKVVTSNRFLNYTQCDKQNVHKMLSLSVKANINLRPKQLNDTKSMAQFCKDTVVTIWHYHGGCLVGKVVSPNRKVLGVDRLRVIDGSTFDESPGTNPQATMMMMGRYMGVKILRERLGNKAGV
>c698
MALKTRFGALLAAIAACSATVYDDVSKLPNQTYDYIVVGAGTAGSVLANRLSEDRNIQVLVLEAGPSGAGALELEVPFYNLYGPHDPIWNWNTTTVPQTQAADRVLEYPRGRVLGGTSTINGMYYSRGPAADWDRLAMLTEEPGWSWNAMQPYFRKNEKLGPSVNGHNTTGEYDPKIHSTTGIVGTSLPNWDYETDPYVNSAVAQLGGEFAFNLDYNSGKPLGVGWYQYTIRNGTRESAATSYLGPSYLARSNLHVLLNTTARRVLSSKPNGTIDTVEYLPSFSTGTPVHVSAKHEVLLAAGTFGSPQLLLNSGIGNHTALSALGITPLADIPAVGQNLSDYNTVILTWLVNSTNTLYDKIRLNATFANASLEQWVEGRTGPFANGVSNHLFSVRLNESDSDVKSELEKYGDPSSGTTAPHLILTLVEGGLSNTSSISMENFVVTPLSRGSITLNASDPYGAPVVDLGMFTHPFDIFALAQGVRVAQRFLSAPAWASYVQTPTAGLEAVLLPDGSINATALDGFLRTQTTAGWRQTGTAGMAPAHAQWGVVDPELRVRGVQGLRVIDASVWPFVPSVHTQVPVYVVAERAADLIKSAAHRQCIS
>c699
MALLLRRSFIMGFVTSLATLAQATVVTNDTSVAANQTFDYVVVGAGLTGITVGNKLTSSSWTIWYDPVTGQNLRSSAADGLLWAPEQQRNSLTVLANHKVDKVLFQESTTASGLTFGIKPGSTVPGSLSGIHTVPATKEVILAAGSLASAPVLERSGVSNKTILGVAGIETIVELPGVGCNLVDQPGTGAAALVAEAYRNDTSIIDGINLFAPELSLVNSEQLWGAPIGYYHDQLTSEASLQSRAQTLVAAGAAANLKGAKMILNVTIDLIVNHQFPVAEFIGESYPTILEAVFWPLMPLSRGHVHISSSDPFQSPTIVPRFLTDNFDQQVAIAVSRRSQTLFVSAPFADVVADPYHNPGLGPNGTDSEWLTWYKETSFGASHWVGSTAMLSRELGGVVDSRLR
>c700
MALLPAQPLPPGGASFCTAQSVFTSFVMTMFAESFRRDAERDRRVPDNVGEEYDFVIVGGGSAGCVLARRLSEVRDWRVLVLEAGAEEPPETSVPSFFTHGIVSDTARVSVTRPQKNGAAPLGTLSVRGNVLGGTSAINGVIYTRGNKEDYRRLEHLGWGYGTVLPYFKKAEDNLDEDVASDTEHHGTGGPLSVQRLPYRDPSAVLIKTALLEQGFDDVHDINGASQLGPTNRTSAFYYQTTTRHGRRMSTNRAYLEPVRGRANLHVVTRARVTRVDVVQGRAQAVHFDKHGVSRMVRATREVILSAGVIGSAQLLLLSGVGPKKHLTRVGIPVVLDLPVGRNLKDHVSVVGHVFTMKKGSNLVNDIEVHWADLELWNRTGDGPAGSFGPTAVGSFYRTKRQPPDDPRPDVQLQASGLALNLAWLPKLAQGCPAAIPDVAHYNLLHFLPVLVRPRSSGTVTLRSADPRRPPVVDLNLLDDKEDLAVLVDGLDFYTRKLASSRVFRKMGWAPMVLPQCALVTPWFGRRYFECLARTVTFPIYHSTGTCRMGAPSDPTAVVDPNLVVRGTTNLRVVDASVIPDSMTGNLLAPVVMIAERASDLIKQKHGASV
>c701
MALLRQGKKSFISPTYPGTPFYSSASPFNPLNPDSPFNPNSPFNPLNPNSPFNRNSPLNPSNPNYYFSQRSLVNANLYPNPLLDSSNPNSPFNPNSVYNPNNVDSPFNPYSKYNPENRDSPYNPFNLNSPLNPNNPNSPLNPNYVKREVLTPEEYYRHETTRSYLNIPDDVITSPYDILYRNNPSYSHVRDAPFEAYEPLSQYYELNPYKYPHSPYSVTEPFGPYNEKYSPLYVEYLKYIIANYGNQFPYEQLLFPYDKEARIKYVKFLKTCFTSDVPPSWFPYAPKYWKNPDELKDIAPLVIQYGPYNPLGFKAPFGDYDEKKNALYYSYLLYKYEQYGLDYSYETLLFTYSPTDSLNYIAFLKTKNEEKPDWWPYTSDYWDYPSLLYTESFSEKALLFSNLDTLRSLTRNPSSPYSNIAPFYKYDCNYNELYLEYIKYIHDLYGCDFPYEQLFFPYAPQDRRKFVDYLKSQYTEKIPPFWPYSPYQWLLPSSLITDDSFSPVTIYGAENPLGVEVPFGPYLPEYNELYCKYIKYIHEKFGPNFEYDQLLFSYVSPKDRVTYYNVLKTKYEKCPDFWPYPSNYWTDVELISHLPYRSIELPTQLVDPIYVPDPSSPFAPFYKYDSKYNDLYCDYIKYIYDIYGRDFPYERLFFSYNTKDREAFVKYLSSKSKDAPEYWPYYPFLWKHLDKIGTYGRVHEVAVDTYLRNGILGPYIPKYNDLYCKYIKYVNEKYGPRYPYDTLLFPNANLKERIEFINFLKSQYTDKCPDFWPYPKIYWDKPDQITIVSNEIGSALAPLDYNPYNPYNSYRTFVPEGPFYKYNPEYNKLYGDYIKYIYDLYGEDFPYSRLYFPYDVQSRSAFIKYLKTLPECKDKAPGFWSSYPYEFTYYTDSTIISDYRSIDIPTDFIEPFGPYLPKYKELYASYIKYINKEFGLNYPYESLLFPYATPDQRIEFITYLKSQFDKCPEFWPLSNEIWTKPDTIKTIEITTRYSIPNNRVLLPYNPTDIIPYSNTDDIYNPFSPINQYSPYSPYNTDSLFDNTHPESLLNPYNPESLLSPLNPRSVFYPSNPEVPSFDYNNPNSPFNPYNPSSVFNPKNIDSVFNPRNPDSPYYNQYQFLYSPLSPYNPRSLFSSQNPLSPLSPLNANSPYNPRNQISYYNIENPKSPYNIHNPESPLYSDSPYYYRNLPLYNPVETELIDQYSTSVYNNPDSPLSINSPHSVLNPYNLDSILNPFNVKSPLSPENPASPFNPYNPEPSIFDSHNIYSFFSPHNPYSPFNPYNIDSPFNSDNPDSPFRNYPQYSRYNPKNPESPFSPQNEDSIYNPENPNSPYNPFNENSLYHPGNPDSPYDWQRTIDLSYLKHQDLPLTRYSPTDYFRSVVTDTTLVSNGPVFKPFYPDNPLLLRPSPFNAIAPFGDYNPKYNDLYLEYIKYVHQVYGAFPYRQLLFPYNIEYRNEFIKYLKTKYPTEEPKFWPFTPIEWKNPRLISDVYEPVPYGQKNPMHARAPFGPYLAKYNELYYKYTQYIYETHGPNYPYRFLLFPYAPEDRISYINYLKSQCRSVPKWWPYSLDDWNNPYNIHDFINYPIRIVRPSVDDRYLNPYLIEERHPRSWLKEEPLSSDLPTVNSPVAPFGVYDSKYNDLYHAYIKYIYKTYGDFFPYEQLLFPYNIQSRNNFIKYLKTVEKERPNYWPFLNYQWDNPEAIPYRLYSQQIPYGAINVLGEKAPFGPYSPDANELYCKYIDYIYAKYGDTYPYETLLFPYSPADQVTFLKHLTSTYKKRPDWWPYTEEEWVTGNIHTRSHWNPIYAPKYPSIDIVRAEEDEILAGTSPLSSPYAPFYSYNPKYNSLYEDYTKMIQETYGSDFPLDQLLFPGSPDDTLTYVTYLKTKYPEEPDFWSLFPYQWQSPDRIQEYPLRLRSAEVQEIFKGELPFGPYQDKYNDLYYNYIEYIYDKFGLNYPYESLLFPYDNVNSLCFIKFLKTKCDKIPNWWPYGKYSWDKPESLFITPEPITTIHNLDRTSLSQYRNYVLGLDDFVPYNPLGQYAPFGFYSPAYNELYLKFIKYTYSKFGRSFPYETLLFPYSPRSRYEFVTYLKTVYKDDQPEFWPFTTLSWNEPRTTEFIQDEVRGISLLTESPLGAFGPFGSYCSEYNERYKNYITYIYRRYGDSYPYESLLFPYNKQDRLTFIKYLKSCYPKQPLWWPYPDEAWDAPEFIERYPYPYPGVPYPDYLIDIPFKRSNLATSPLALYGPLGEYKSKSNALYYKYIQYIYERYGLNYPYELVLFPSDSIEKRIEFVKYLKSVCKEIPAWWPYSEEVWNNCELLKCISVKGPYTLGPYAPFGHYSCEYDSLYNEYIQNLYAIYGNSIVYDPFLFPYEPRSRLRFTKYLGSVYKENIPDWFIYGSDFWQDIQIYLEKSSTTTVAATSTTAVVDASPNMRSLLGTLDAVKPALPDPKDELLKFQGSYEFWATYSPYKFDRSGLYSYSLFTTFFEGLEKERYNIYRSVIYPPDMTPYVKSGDCFDIIIVGASAAGCVLANRLSEVSSLKVLLIEAGGDTPIHSRIPGMSSVLSLSEFDHAYLAEPSQFAGLGVRNARIKITAGKGLGGSSAVQNILYQRGTSYDYENFAKLGYNGWGYDETLKYFVKSEDYRSVIYNESKAVHGTQGYLPVGLFKNKENNIIREIFETSAQELGYPCPKDMNDRYVDVGFAELPGMTRYGLRFSAADAYLTPIAGKRTNLYVLKRSKVTKVIINDQNVATGVEYVNSKGETVRVTANKEVILTAGAIANAQLLLLSGIGPKAHLDEVKIPVKQDLR
>c702
MALLVESSRPGVGGAIPPFWTTLRSAGRWSSPEWWGDHVGVWPVSRRPPPGRGRPRARGTGGRPRGRDPRRHGPCAPRAAPAPGTDRRAEPRLLRVDGRRRAAGMERRTERGGVGAARRPVPRADPTATLARPPGARGRPAAALRLRAPRVTGMVPRGMGSQGMETRGVGTGGHEPVACDVLVIGSGAGGAVVADRLTAAGRDVVLVEEGPDVPADLALSPAEAMRRQWRCGGLMTAFGAPLLAYAEGRCVGGGTEINAAILQRIPAALLDAWSRRYAIAEYGADALAPYFREAEALLGASPPERPQGSVTTRFAAAAAALGWDHQSLTQAKDGCLGGATCAEGCPPGRRSMASAVLPRARARGLRVIADCRVVRLERRGARVVRVLARRRDGAGPARPMTFRPEHVFLCAGAIHTPALLRRSGLGRNVGASLRAHPVVRAAALFPEPLTVRHSATPLSAVTEFMPDLRLGGSILLPGYLGMMLAEDWQRRGWLWAHRERVGLYYAMARAEGRGQVIPIPGLVEPLVRYRATDDDWELLRRGLLALSELLFAAGAERVVPSLFGHAGWTSPGAARAELAAPLRRSRAGLATLHLFSSCPPGEEAALTATDSFGRLRGLSNLTVADASQLPEAPGVNPQLGVMAHAARAADAFLAASDAQARRRAARDDA
>c703
MALLVHPGDRYPAQIQALIVLEPTKSSEVAKCPSLLTSLISGPNNTSGCPQRWDSYIRTSLLTRSQCPQHLKPHRFPWSHCLQHLKTHRYPSVTSPFCLSPCAQPLPRIVPLISRSITVSVLSPLFALIMLDHGSKIFSLLFLAFFPRGSHTANMPEMFDYIVVGGGTAGMAVASRLSEDPALTVLVLEAGGTGVNNTGISIPGLVGTTLGTDVDWKYSTVPQSGANQRQVYYPRGKVLGGSSAINFLINTKAEKNDYNAIENLGNPGWGWSRRELVSKICSTSIQALLPRGRLGDRPESSYRNYRPIWR
>c704
MALMYLFAVLSFIAQLGNRGVWAKTSTQLSDLQDSYDFIIVGGGTAGLTIANRLSENFTHSVLVIEAGPIDSNRKEVTVPWFSAVGYMRPLFEWNISTVPQPGLNNQEIMCNQAKVLGGASLKHALVFDRAAPGDFDAFKSLGINGWSWKDIIPYYKKFESFTPPPQAKVENFGAVFEQQCHGFSGPLGVGWNDYIFPKDVAFLQALDSLKIPRSRDPACNKLGTFLMPSSLDQHNQSRTDSKTAYYDTALSRVNLDVLYLNQATKILTENMNGSVKATGVEFAASREASRHTVQAKKEVIITAGALRSPHILLLSGIGQAERITKHNITHVVELPGVGFNVHDQFTVPLSYDVKAGVPTSDDENNAAFMKEQEMLYYHNRTGRWTRGYASIFSFMPISKLAELTGDANSFISESYTAFDDSSISNDTPITVAAGYRRQWKVMRDFLSRDSMAAWEITFVGGSKYTTATHLHPLSRGNVSLASSDPFDNPLVDPRFLDHPADYEALFEGVRILRRIANTDEVTNTLQLTETGPGMRVTSDDELRKWISRGSATGNHYVGSCAMLPKRRVVLWMPLSEFTVYQIYASLMLVF
>c705
MALNSLSPSNEPKIVIVVANQPTQTHMANSFFSSLSPLSNNTKALVSQAAANGPSASLPQNVPAEVARGYAAQFAALNKKMVSTDAAMMEITWVDGSVESILQHPFSRGQVIAPSSSAFDYPIADPGVYRNNIDRAIMHESVSFTRKIMATASMGGLKPTEAVPGASADVDAWIRSTTICIYHPAGTAKIGPREDGGVIDENLKVYGVQGLRVVDASVMPMVPAAHIMATVYAVAERAADIIKGGK
>c706
MALPKFQSLLALVLCATTSSVVAASCPSTSNSEYDYIVVGSGAGGGSTAGYLIDAGFSVLLIDAGHDVDTVNTTVPLYFPNAVEDPDLVFGYKLDEFPEGFKYQRNDVWYPRSGNLGGCTRHNAMINVLAGMGPDVDIVADMFEDDSFSRDAMQDQWKRIERALYDPGDVADHGFDGWLPINDNPSIAELNASNPAFLDDQLIDFLTTVQSSGEPITDFNDLSADNAVGVGAPVFTKTADHRRSSVRDWLVALESSTNRLTFQLDTLVTKVLTCTDDSGNIKAYGVEYAEGVTVPVSPKFTGKQDLDTKTVTAKREIIVAAGAYQSPQLLMLSGIGEAAHLKEHGIDVVVDLPGVGQNLQDHDEIAVIWELKEDLAIFEGCNFKSDPEEDACLKYFLESGKPNLYSFGGLVLATAMKTDRPEVTDTDIVIYWSPVHFQGFVPGFSQEIAQNHNAVTAVHLKARPSSRGYLRLTGGHPQDELYILKNRFQGDAGYQDVVDLREAIKHSREVLKQEPFASHVASEIFPGEGNGTDEEIEDHIYKHIFGHHVCCTNAMGPDSDKLAVLDQDFRVRGVQNLRVVDASSWPIVPAYFPTASHLVLAGRAADAIIADASAA
>c707
MALPPAAYLAAGLLYLAAVTPLLVAAAAVRAGARALGAALDRWLLVGGAPTPHHPSVPDGYHDAADAPVATAVAATRWDAILIGGGSAGCALAAGLLPAAAAAAPPRRVLLVEPGAAVPPAAAAPRDWVTAWGGAADWAHATSPQGALGGRVLAVPRGKALGGSSAINARVWVHPTAADVDGWGVRGWGCAALAPARAALDGAIPRTRADRGGGGGGGGGRGPHLGNGAAPRGGRRGVAPQ
>c708
MALPRSAAAVFLRTSCRTPQRLASSSQSPTRAISRPQFTARARQPTFTTIRSLTNSPPSESKLYDFQQIQKLSSSPSKEKVLIDVREPSEYTAGYIPTAINLPIKSQPDALFLPAEEFLDRFGFEKPQAEQEVVFYCKSGVRSQAAASLRGRSDISSSDPEAFSSQTYDYLIVGGGTAGLVVAARLTEDSNVTVGVLEAGKNHLDDPLVDTPAAFKDMMMKEDYDWGFLTETTGER
>c709
MALRRSADYVIVGAGSAGCVLANRLSRTGASVLLLESGGAGGETSFDRPSLLSRLPTALALPMHFEGYNWGYLAEPEPVCENALMGDDSDILPGRRGTDGPLQVKHGTNMLGTPLYDAFEGTSKMPMTVFHSGSYKGERASCRAAYLEPAMEAQPHLSALSALSRRSLGALSALSRRSLGALSALSRRSLAYLEPAVEARPNAHVRRILWEDGGDAPTAKGVEFSVGGGSQKAVATANKEVVLCAGSIASPMLLQLSGVGPPKLLSELGVGVDHMEVYQSYEVLKPVSLASHLSLAGKGSLGAHWLVTKEGLGATNHFEVGGFVRSRPGVEAPDIQLHFLPIGMSYDGVTLAPSSTGHSMQAHVGYNKRGPTIHLISIARFIYLFIRRIPPAGSPVKPIARFNYMSTDEDWRGFRAAIRITREIMAQPAFDGLCGDEIQPGYAAQTDAEASPPRAWSPPRGPRGGGREIDEFLIEHLESAYHPCGTCKMGPASDPTAVVGADGAVHGVRKLRVVDASLFPVIPNGNLNSPTIMTAEKMADHILGQGMLPPDTAQAAKTWVDPEWRSRQRERAPKVKTWDGVF
>c710
MALSARRDIADSADFVVVGSGAAGAMAARWLAAAGHQVVLVEEGDQPVAWPFESPNALRMVHGGGRWTTSGGDAIALTAGNCVGGSTAIGYGVHAQLPEEVYESWVQLDPSLHNRLGYSEIDLARTQIESDMAVEKVPRELWGASGQLLLSAFAGSAEPVWRGAPGCRGTGRCVAGCPTRGMSSVDRVLWPIAQRLGARLHSQARIERILIEAGRAVGVIGRTIQGSKVSITARRAVFLCAGALNTPLLLRRSSISCPSWGWQLHADALVTAMMPAPLDDEQAAGLAIAGPIPEVDTATIAAVSILPRQRAMQLPGAGLALEQRMEHLNHLAIWRVTVPCQARGGLENGLLGPRFNLKLATSDRLRLLAAVSVAADGMLRQGAIEVYPQVHGVPAVATTVDDVAQITSVAPTAGAIALHANSFFGGLRVDERYCVPGIKGLVVADAAALPACTVVPPMATVMAVAMAAVQRWV
>c711
MALSESEVFDVIVAGGGTAGCVVASRLRQRKPSLSVLILEAGGDLSQNPNVFSTRAGMLLLGSDADWKYMSAPQSHLNDRPIYYESGKGLSGSAALNSGGWIRGDTQDYSQWARQVSDQRWSYEGLLPYFKRTEHHYDPNGDPEQHGFEGPIRTSSVSFSGRQYPLRETIQNAWSSLGVHVINDANNGHPQGLAELVNNFPDGRRQLTSEVYPLDGVKVVIDALVKRVILDDSKTATGVELADGRIYSVRSGGEVIVSAGSLRTPQVLLLSGIGDQDQLSKHQIPLQINLPDVGRNLHDHLMIFRYWKLREPEKGLALGSPLFNGPNYEKGGPGDWIVTTSVASTGLQNALAKDEGGPIDNDHPLVAGPRSHLELTTIYAAFGGELAGLKIPIDGTTIMNFFMSCLPTSRGSVTLQSNDPASQPAIDPNFFATEADRFVMREGWRLLSKLMFETSEGKALVAEEVVPENHESLLSQASDDSIDARIRLAAISTSHPAGTASMGTVVDGSLRVKGAHNLRVVDASVIPMPLASHYQAAVYAIAEQAVDIILEENPNL
>c712
MALSETQRATLRAVCDTFYPALERPDDPTGFWARKASDLGVEAEVERYLEGRVDPVAREGLKQLLDVLTAQDFAANPQEVREQMLIGFAAFGPEVAAGIDAFRSLTLLHAYGVVGPDGKNPNWPVLGYPGPQGPTPQVEKPIRPLEPEGDRLELDADVCVVGSGSGGGVIAGVLSQAGHRVVVLEMGAYYNEADFNQLELWAYEHLYYKGGLPPTSDGNVVLLAGSNLGGGSTVNWMTCFPTRPAVRAEWAAEHGLEASTGPTSTATCAPSWSGSRPTRSAATSTARTFGCGRAARSSAGPSRPSSATQTPRPTTRRVPPTCISAIAPAAARASRGPTYRMRPTPELSLSSTAVRSG
>c713
MALSGRALLLFELLLLLACLLFLLELSQGKEEAFSLRNLPPFHKASSYPAGCPTTYDYIIVGGGTAGCPLAATLSHRYRVLLLERGGSPYGDRNVSYMQNFHIGLMNMAPDSPSQAFISTDGVINARARVLGGGTCINAGFYSRASPSFIQEAGWDEDLVNKSYPWVEDKIVQWPKIAPWQAALRDGLLQAGVAPFNGYTYDHVSGTKVGGTIFDETGYRHTAADLLSAGDASNLKVLLHASVHKIVFGSRQGRLKARAIGVEFTDEDGRHHQAFLNSNRDSEVIVSAGAIGTPQLLLLSGIGPKNDLKNHNIPVVLHNRYVGKGMADNPMNSIFIPTRSPPRQSLIETVGITEEGVFIEASSGFGQSSESVHCHHGIMSAEIGQLSTIPPKQRTLEAAQKYAHNKLNLPKEVFHGGFILEKIDGPMSTGHLVLTDTDVRNNPAVTFNYFSHPQDLNRCIYGIKTIERILKTNRFSELSADGAGLSMERVLNMSVQANVNLIPKHTNDTESLEQFCKDTVITIWHYHGGCHVGKVVDQHYRVLGVSGLRVVDGSIFSKSPGTNPQATVMMMGRYMGVKILRERLGRAAGV
>c714
MALSLSLVASLIYILSYGSEDTTTNTTSVPHTPQDPDQWPQEFDFIIVGAGTAGSILASRLAEVRSWNILLVEAGGDPSNISYFPENRGQLYGSSMDWAFVTEEQSGMFLSLSNQRTTIPCGKGLGGSSSIHSLYYTRGDSRDYDEWGYDAFKFDNVLKYFKKSEFMTDSSKYNEFHGTQGPFVVKPSPRVDKTFDTVGKACEDRYHVWLTDSLSGWGGCLIS
>c715
MALSTVARTNLLVTVIVALSACIHASPFFRRSDHPSSGKKSADFIIIGGGTAGLTVAARLVEADFTVLVLEAGGFPDSYGLPWDSPALTGEMTDTPVDWNFTSLAIPGLNGRTVAQHQGFCLGGTSSINGLTYGRGSRSIYDNWEAIGNPGWGWDDVQEYFERTWKLVPPPNDAHYRTYDPSLYDPNAGPGELGYTNFNPPSIDAFVESLPSIGIPISLDLNSGNNIGGKHELSTLDPLSQTRISSYTAFWNTVVGRSNFEAITFAVVEKILFRSADGKEGSSQPVAYGVEYSTTINGQKRKQTAYANKEVILSAGTIQTPKVLMLSGIGPRQTLQDLEIPVVYDNEWVGKNLRDSPSFSMIVKTTDEASTNKFQHNMNAIQAAMAEKASDPTSSSNPLNAIDGNSGPAYSFAKLSTSDLEDTGASYLLANQSDQAHYEVILWTSLYPLPDNVPTLNNYYDFSNYTQESYVSLASYLLVPGTGGNVTINSRDVSSPPLINLPFYELDADLNIQILSLKRLRTLISQSAFAQYTLGPAYGEIVPGPDVQTDEDIANFIRETSVSAAHQAGTAAMRPLDDEGVVSPSLEVYGVQGLRVVDASVMPLFVDQHPTAAIYMIAEKAAQMIKDKYGAE
>c716
MALTAQQKATLGAIAFAFVAPLSKDAAAAVVSAHLNDVDDSSAVKSKELEAFAQMPPPDLGVVDAIESKLNFFPADKKYEFVKVLDVLATSWGTYLLTGSKRIVPFHDLTLDEREHALLNLSQSRFALLRSLFRALKALTHLCTFAQHVTNDTGDVNPYWKALQYAGKPTEKALPPRSHFHEPCFEDVAALAEAANGGPIEIDTDVVVVGSGAGGGVIAAELAQAGHRVVVLEQGTFHHPSDSNFAEMEEYEKHYIDSVFLVSEDGSMQLLAGKTWGGGTAVNWSASLRPPSDVLDEWVKKHNLPYFGTPEYQAALNAVCTRAGVSADHVSHNVPNQILVDGCAALEFPAHAIPQNTNGHRHSCGFCSLGCPYGEKQGTHMTWLQDAEAAGAKFITGCKVDKVTFTADKIATGVVGTVLDGNVSIVVRANTVVTACGGVNSPALLLRSGLGNPNIGRNMRLHPVTTVHGFLPDKLVKSWEGSIMTSVTDVVSNVHGDGYVLNTVGALLALELGMVLVWKPPRRCWVLRRRCCRGAVSQTLRGSCCKFPISRGS
>c717
MALTRFSVLALLALSAIVQAGVYQRFSDIQNVKFDFVVVGGGTAGNVLANRLTENPKFNVLVLEAGPSHDGVLDAQVPFLAGNLWNTPYDWNYTTTPQSALQGRTVVYPRGHILGGSSSINFMIYTRGPSSQYDDYARIVGDPGWSWNRLQPYFRRNERWVEPADRHDTRGQFDPSIHSKKGINAVSLAGFPTPVDGMIVGAAKQLGGDYRYNLDYSSGNMLGIGWVQTTIDGASRSSSATSYLGSRYLGRRNLYVVLNAQVSKLVHTSGTRVPAFRGVEFRENGGGPLKRVTATKEVLLCAGAIGSPHILLNSGIGDAKALKSIGVRSIVNLPDVGRHLGDHVATANPWIVNGNQTFETLKEPDESAEFLQQWKQNGTGPFVNTIVSHLGFFRAKGSPKSSNTPEYEFLISNGLIIPNPLVPSGRNFFTIVTALMTPKSTGSVRLRSSNPFDAPLVDPGFLKDKSDVDLLKESIKSAFKFVAAPTWSKYIVAPTGGLESTNTDAGLEDFILNNAGTFFHPTSSAKMSKKGAKDGVVDPDLKVKNVDGLRVVDASIFPYIFGAHPQAAVYVYAERASDLIKAAYSA
>c718
MALVERSVEVDLSTESKKLPVTRFVLTALGVDSVSNYHGSSGHVHAPFPREMFTGPQQPVYIDAVSNLTGMSYCADALGGNSNCVTYLPMSINPEDNYHGSSLAIAYLTPVESNRTDWLILINHQVKKVLLSRTLPNVTATGVQFKKSDETSETYRKCSLLVSLDHRNCFSYLSIWDRRPVNLGTARNRCKGRSTDCWLKLPRPDWGFTQPFHPSSYNRGGRGPDNVYAFDSLEQLLAESAGHLLAYNDLSADALTQVFRIQAGLITNSSGITCCRNLLEQWNIQLLKYSSFDGIATGEPVNHGIGSAAMMRRDLGRVIDGSLRVYDTTNVRVVGGSIRPLHVSAHPSSTLYGVAEKAADIIKSGKQSVAYDSTVQLTMCFCFVIFIHVVQTRRTSTQAPNFDRLREEQSYSTPIPHDSWRLFRSSRALVFADELYVFVLWHFIDGGDTIPSPQFVPLQNMVLAFEIPKQVLTFYPIDPLCSGHARTSLAFQSSVNANAWPKNSLPVMSDE
>c719
MALVHGTLTARDRQTGWSLLEHQDDLRRRIETSLAQYPISYLYDDEVEESHAGCLQLQGFQAFLRHIRRTLRESPRSQSLKALTQKFQTAAVPPSPMAELYELLDLSSDVPALAVVETIESVKPSRRYFQWQAACEAAKKPGKLECHEDKIREGLCRKARAQGLTVPSEEELQKQLSQIVRSGMDRGVEHAERAARLWSELSLDPEHLRWQRVRSLWKESGGEELLAQYQALDRAQGDDRRIHGSDFEATDARLAASLAVALLQSRADLFPAAPNVGEAPDCEVKFLQGCTWHDSKRRVCGEVDVVVLAGRPGEEAWQGLAVAIVEMKSGWFELPSALLLQHTSKISGAHTGEAFLYWNSHRILLGDPYVFVATLIPRHPFVIGLDPELLRAVSKKLFQGNSVAPVEEDLVECEKLLNSLRANHHLRSRLSLSPRGLLQHPELKHRTARIHRDGSPGVVDSQLRVLGTTNLRVADTSVYPESPSGHSDAPARLVGELCARFVLRDIARATDQVKEHAGGPAVQLRGYRGVRMPLRGFGTNGVQGEKVRQSLTSFFRLGGRMVDTAVLYENHVDIGRVVANSKIPREEVFIVSKIPPTQMGLDESYEAVLRSVKELGTHLDLVLLHWPSNFDKKDPLPACASVSWRACRAAAWKGLERAYMEGKVRALGVSNFGVKHLSALLADGPSLPIAVNQIELHPWWPQLALRKYCKEKHIALMAYGSLGSSLLGGATLRSPAVAKVSKRVGRSPAQVLLRWAVQQGVAVIPQPVRSSVVPWL
>c720
MALWFGKYLASALRRCVFADLPLGSFNQQQHQSGHTVEPGITAKLQIFHAVAVWRRRHKGHLRYRKGFHKRKALSLYHKMRTAALLVFSLFLTVQCAVSNIPNDYQVFDYVVLGGGGAGSAMASRLSESPSKNVLVVQYGNDDPCYLCDNTTQMTMIFSGLYTSNGDDYFSTPQLFRGRSIREVRTGLPGGGTRYYGAVSIPSSKKVFDTKWPAGYDYNTMLPYLRKFQDHYCNYFNSSVTNISAADCALLHGKGGPMSLSSPYPGVDYQTVVQDFYKSASEFNVSVVPDAYNPQYQKGDYVFPITSFQNRANKYDLLSNRSRASTWTGYLPLSVRQQRGNLKFAFNSEARQLIYATDLLMRPDLLIRLGINVSTLSRTPKVVGVLYLQNDTLKAAFATKQIILSGGVTGTPHFLQHNGIGPTDLLTQKGIAVVADNSQVGQNLAVHQAVSMVFVAKQPVPTTTTNNGDMANMQMTSPYNEGYPDVEVELKFGVGVRSIDPPITAVEDFYLTTPASPEGNYPFISTIVTVTNPMFRGSVNVTGPKFSSPAEVEYGWPKDAGGYATSVDYSKLTWGFNRMRQIFTGNNSFARKWVQYENCPGVSSTLPQSTNDLFYSAQYQHSVYHLTGSVGLGRATDLQGRVKGITGLTVCDNSLIPHPPNANPTTTMLALCERIAEYVKTY
>c721
MALYPYHSGMPENLQGPLDLQEASKIASEAALPPKGNPAFAESARLAYLANEAAFVTTSRTSPALGPTFWLHFHTDRWRPNHRVTIRTAEAGWARDLLGLYRYGAWHFELPKSAFPRGIVMKFLLDGDHWMVENNKSLDPDNNHHFMEEDVTFSSTETRFRIPYDNFVSEAAQGREYPVVGNTNEEIHYEVIIIGSGMGGGILADALSDKGVKTLVLDAGGVAYPSHINNLPGDWVSLPGKHQVNNFENKDGSELLGGVQMSLGGRSVFWSGLIPRMRDWELSSWPSVIRNYLTHNGYDQAERLMRKRQSMGEFQNQLLDDLSGNFPDFLCKDLPRSRHQPNLKPDNQLDDVLETPTGVFSSADLLLDSLAFEGKAGRDNLTVNLNHLVTEIETENGRAKAVICQDLAGNRRRRYTADRIVLSAGSLESPRLALQSNLNDPNGKIGRGLTDHPAYFSHGGEDFGYNIPSHLPNGAPHPFGDPNLHAKVLMQHKQADSQSHSFNVEILLNGWFWDLRHSDDDVRRQRLSSNAQSEIKFTFIFASDLNDANWVQIQSADQRLAVKVARNPAGEQYFDECKQLRNRLLDFFRVPGVDPDSGLGNGNQGTPHHAGGTLRMSDDGTGVVNTDLKFEAYENIYACDNSVFPAIPCANPSLTLGALALRLADHLAQQVHA
>c722
MAMAIPCLHNTKSRMLDCGQSSPFLAGAARMVSEVDIIIIGAGSAGCVLAERLSQDCDRQVLVIEAGARGKTPTISVPAGFVHHFNSSRYNYCYRSEPEPELGQQRVYQPRGKGVGGSGAINAMIYVRGDRRDFDDWAAVSSPRWSYDAVLPYFRRLERHHSEDTRYHGRDGSIGVLSTRDSAPELCHAFFAACDATGLPNNHDFNGERLDGYGFYDMNVRAGLRSSSAREYLTPALKRSNLSLMTQTQARRLVFEGRRAVGVEVACGGERRTIKARQEVILCAGAVDSPKLLQLSGVGDAKALARLGIDSVIDNPRVGQNLQDHLCGSLFFESREPTLNVTLGRLTGKLRAGWDYVSRRQGPLAFGVKHAGAFVPLEGTGLSGHGEHPVQESGDGHAKAQVFFNPISYALPEEAGGRLVLHRHAEVSLFYNVCRPYSRGSVTLKSADPDDAPAIHNRYLSDARDKAELLAAFRQVRSLASAGPLKDILVDHRGYADMHSDEAILDDFRASCGSIYHLCGSCAMGTRLENSVVDPSLKVHGAEGLRVVDASIFPNITSGNTQAPTLMVAEVAADIIRQSWNT
>c723
MAMDVHSGRPTPVVHRRHALDARLCTTQPTVRLNNVPGQNHSARVRFATTAQTEGSVMRTRPADSADYVVVGAGSAGSIVASRLAASCASVVVLEAGGTDRRPDVAMAIGRASIYRQANWLYPCTPDSSKNGFTDTFVPGRISPTLGPSRTEPVDRSRCPGARIVAGQAVVLCAGAIGTPAILLRSGVGPCGSVADVPAVGENFQDHLVALDTWRSKVPTSSTLGPRELRVVGTESLSVVNASVSRLFLRVTQKLQR
>c724
MAMEMAASAIAHARQLGQTALKTVSQGQHTASLRQQEAFFQVMFDASFPAAKRVAYQLYPNKTLVDSPKYRANLEFQLRRIPPALRTAIFAVLHAMQHPVVFNNIVNPPTNIPQIANLLGVIELAGRMTLPSLLDNPQISPNHFSIVQRNTSRVDLTQFDTFFKDGRIPRQFRKNDFVIVGSGPGGIMTAHILHEKYPDAQILIIEEGDYYPGKIFGNSTPIRATGEFYSEGGVTAAIDLKNASGTAAPTGKAVGGSMEIFSTTAARVRTSEEFELYGLSKYMTWEKYQKTVAWVEEIHDVAENPQEIINTITKEMIRAAQNMPKESGIRNAGPTKSFSAHKCGGLGKCPVGCDTGGKETTAMVLLPALLASGKVGLVSGAKVTQTILRSDNSPKAVKIFSMEGVSTIGIEDGIISSAGTFGSPVIVHNAGIRLPMLGKKYTGQAAFELFAFNPNKKIDPPQHVGKPQSGYIEVYNTDNALADLVATVDGFIGLGEGARPATGILAMARRRLYGTNLRDSIEGLPYTGVFGGVLTENMEDVRAGLSGGNVYPGLSNIFGQKVLTYSLSERDRMRRKLLALALLKVAANTPQGEYLGIGLNHFFPSKSKYASWGLFLSSELPEFERYLLPNKKVDLSEEIFFHPMGSMGDCVDNEGKVIGSKDFYVIDGSLFKGPGVNPTISILTVAAELASKIKRRKRIH
>c725
MAMPSSGDLKAEVAIIGAGPGGAVTAMLLAEAGCDVLLLEEGPDLPLDSALHFSSDEVAQKYRNGGVTVGIGEAKMAYVEGRCVGGGSEVNRGLYSRAPANVLAAWRRDFLIDGLTDAEMKSHYEACEQVARVSNLPGQAPPLSQRLHEGASRLGWKAEEIPRLVTYQRDAKSGRMIGRKQSMTETFVPRFIQAGGRLLPGARALRLSRYGGQWQVRTRSLENSKSARRFDLMAKTVIVAGGATQTPVLLRRSGITRNIGDNLRFHPMIKVVAAFSEEINPPGQLDPVHQIKQFDPRFSMGCSISSRPLLALALVDHPEHLVEVERNWRHMGIYYVQTTGGRGVVRTLPAFSDAFVRLRYSSEDMRELGEGLQKLGECLFAAGAVALYPGIAGSPVLRSLEDLKRIPVELPKERASLSALHLFSTCPMGENEFRCATDSFGKVRGTDGLYVSDSSLLPGATIVNPQGSVMAIAHRNALRFIEKRAVASGQRY
>c726
MAMSLGDPHDECVGAGSAGGIVASRLSENENVFVLLLEAGGDPLGINDIPFLWLDNVGHPDSDWMLETVPQKNCALAYPNNIIAQPRGKSLGGTSNLNAMAFWRGNPNDFNTWANLTQDEEWTPKYHGELGPIHVTRQTFHPLKTEWITAGIEMGFPYEDPDAIQTSTFVPVDVSGLDGKRWEVYHGFLEKALQKKNLDVLRYAEVTKINLSGDAGRAESVTYTRFGQVFTAKAKREIVISAGTYNSPKLLLLSGIGPSEHLRSVGIEPKINLPGVGSNYIDHVVSTIGPFLLNDSVSFIQKRDLTAQSVIDYVTNGTGPLSWNLLQGNGLISTHDEPDWPDIIYHHMPIGGNNCKVLGPLSEGICDKYMQNVGENQDAMWAIMFLGRDPKSRGTVKLRSNNPFDAPLIDPNLFSEREDVKAMVDGFKFLVKLFEETDAFRKYNSTLIQNKFPGCESHEAKSDAYYECYLRHVTRTMYHPSSTCKMGASSDPMAVVDSNLKVRGVSNLRIADASVMPIIVNVNINAATMLIGEKAFYLITKDWEMDSSAMRRYIMYSWAVLSFAMISTLVLFLVDYKRKFLFNKFKQYFAKYYERSDPSKSDVVDALKV
>c727
MANADYLIVGAGSAGAVLAGRLSADPNVEVLLLEAGRDYRSKETPPEFRPRNLSNERSINNPDFYWRELTAQRNRYQQEFAYVRGKGLGGTSTINGLCAIRGIPEDFDRWAELGATGWSWRDVLPAFNRLEADAQFGDSAYHGSDGPVPIYRESEAGWGIMDDALRDAALDAGFPWCEDHNAPGTTGVSPFAMNIKDGERVSTNDAYIDPIRDDRPNLRIIGNAEVDRLEFSGNRVSGVRCTDGRIFSIHTDGTVILSAGAIGSPSIMLRSGIGPEDQLSSMNIAPKSVLPVGMGLQDHALVTCVVPTVESFGRRAVGDRPFNCILRYSSGLPGAGENDMLVMALNQNYWLNQANAGVAIILNQCSSRGRLTLASTDPTAAPVIEMDLLEDQLDYARLVDATEVVRDLLSRKPYRDVASGPALIPAANDIRHVVRDGMHMSGTARMGAPDDPRSVVDPDCRVLGIDGLRVVDTSIMPEITRANPNLTAIMLGEHIAARLNR
>c728
MANETHEFDIVVVGAGSAGCVVAGRLSELSGLKVALVDAGTKDNLRLTKVPAAVLNTLGHPRYDYRFKTEPDPTRNGRVDQIARGKVLGGSSAINGLIFARGAPVDFDRWSAMGNRGWDWQSVLPLFRRLETSDLADNSLRGGLGPQDVTLPTYRHPLTDPFIAAAGRHGIPFNPDYNGETQEGIGYVQGTIRRGVRVSAYDGYVAPNLSRSNLQIFAGCRAEQLTFEGNRADGLIARRGDRLLQLKARRGVVVSLGTFNSPQLLMLSGLGPAERLQHYGIGVRQNLPRVGQDMLDHTGFRMIMEVDTPTANNQSRGLRAPYHLAQWLLGGRGPVGAASAEAVGFFRSDASVATPDLQVTFFPYASEFAPTTGRAVLKPKSLISVGLNMNYPRSRSHVTIRSANPADPVEIHYRLFENENDLETLVRGLKIMRSLVDEEPFGKHIVDRSLYPSNEACEQADRDFVRANSRSYMHPISTCRMGTDENAVVTPDLKVRGFDGLWVADASVFPDHISGNINATTLMIGEKAADLLKADLRQFA
>c729
MANEYDFLIVGGGTAGCLLASRIASAASKPSVAILETGENNNAVSLRRTYDRFLLAFTQPTMEYGYMSTPQASADDRKVQQARGRGLGGSSQINFQLWSLGAKDEFNHWAAEVGDNNWAFDSVLEKVKKIERLHDYSSQDWGSIVKPDPANHGYEGDVDVSIGPYIEREIKTLFEASNELGHETNPDINSGNPIGIGLPPSTSWRGSRTTSASAFIEGKKLDNLKVFTNSRVVKVLLEGNHAIGVELENGKQLIAKKDVVLTAGAIDGPRLLLLSGIGPKAHLQSLNILLARDLPSVGQGLTDHPAVPITYHMKPGFSNRHVFAADSNQVTAATEQWLQDRTGPLVEHFGSIPLAFFKSEKSYQSEEFRKLPQQTRELLQKPTVPGYELAMAAPLMPPTYEIEHNQDGYCSYFAAVQNPQARGEVKLKSANPQDLPLINPNYLSHEYDVVVLIEAVRKVLDYMETPALKKYIKNAIVAPISSSEEHIKDFLKTSVEGFWHISGSAKMGRPNNEKTSVVGPDFKVHGYNNLRVADMSIAPILPSGRTYLESHLDSPNLLIN
>c730
MANFDYIIIGAGSAGCVMANRLSEDPNAKVLLLEAGGKDKSMLIHMPAGVGQLISKENKHNWYFYTEGQNHLEGRKLYWPRGKVLGGSSSINGMIYIRGHARDYDQWRQLGLTGWGYADVLPYFKRAENSEARDDEFHGQGGPLNVSTGHSQAPLYRTFIEAGKQAGHPFTKDFNGFAQEGVGTYDLTISGGQRWSAARAYLTPILGRENLTVEVGALTSRILFEGQKAVGVEYIQKKERKHAFAGAEVILCGGAVNSPQTLLLSGIGDGDYLKKFGIDVISDVKGVGENLQDHLDCIVQQECTKPVTLYNQMGPLKQLMTGMQYTFTKSGAGAENGLESGAFLKTRAELEVPDIQLHFINVIMTDHARVKPDRHGTTTHICQLRPESRGFIKLKSKDPMDHPLIQPNYLEAEADRIVMREGVKIAREIYAQEAFDVYRGPELNPGADVKTDAEIDAWIRRTAETIYHPVGTCKMGHDDMAVVDGELKVRGVEGLRVVDASVMPTLVGGNTNAPTIMIAEKASDMILGKAAPAPLDIKVAEDSVTAAAL
>c731
MANITGDQGWSWNAMQTYMKKVERITKPADGRSLAGRIRPEIHGDSGPLSPSLNGWEDNIEKRIIKSTSEQEEFKYNQDHNGGYMLGLGYTQSTILGGARDSAATSQVWPFLNVNKLDVVLNAQATKLVQTGTERCCPAFRAVEFAKDAQSTRYTVQATKEVIVSAGAVGSPQLLLLSGIGPAAELKQVGIKAILDSPHVGKNFQDHPLLSNTFSVDP
>c732
MANKDDKDKQDTDKNKFSNSRRTFIKSSAAFASTAAITSGVNAFEKPPETGKPMPEPETGNTFDYIVVGSGPGGAPLAVRLAKAGFTVAVVEAGIVTPEDTNAYNIPAFSVKAAEDESVCWDFYPKFHDEADDHGFKYDEEKSGVLYPRAAALGGCSSHNAMISIYPEHKDWDQIENITGDSGWNHKKMWGHFGKVKEWLPISVPNLTPAALIQSATDFKLSKIVFSTLLTTASTKSIEPKSGFSTIFNIFDDDINGKATVDGEKAGCFLVPQATKNGKRYCTRDYLLSTSVKYAHLAIKTQLFVKNIIFDENSKKPKAIGVKCISGKNLYKASPRSGDTAAEGELNLMARKEVIISAGTFNSPQILQLSGIGDRNHLESLGITVVKDLPGVGQNLQDHHEISVVTEYDSPLTSVAGCTLGEGEDPCLDKYLSGSKDALYRNNGIAIVAKWRSGEPANQGSDRADLCLLGLPGNFRGYYKGYSKDFLKGDNNNLFSWLVLKGHQTTYKGWVKVTTTDPLHPPEINFQLYPDDQTGEDTLNTLLKGVKIAQSFNNKANDLDWLKLNQSRQVWPPADLNDEELKTFIKKETWGHHASCTNKIGADDDPMAVLDSKCRVRGVKNLRVVDASSFPVIPGLFVAIPIYCLSEKIAQDIIDEA
>c733
MANLAVPRPEPLSEAVPSPLRGRDLGVALRGEPPHSVGSHKTGGIHPEAGRHCRKRSPITCGRLEMVSSTTEWDYIIVGGGAAGSALASRLSEDSSANVLLLETGKDIRPANRPQNFVGREFDLDMGAQPDFWWHGLQTRIHPTLDPIPFQAGRGVGGTSQVNGLFSIRGVRDDFDRWVAQGAEGWSFDEALPYYRKLEDDLDFPDAPYHGRGGPLPIYREPQKNWGGADNAFRDAALDLGVPWHDDTNAPEATGLSPFAMHLRDGKRVAANDGYLEPARERGNLTIRGEALVDSVTFGPGGKVTTGVRLAGGETIRLAPGGEVILSAGGTLSPALLVRSGIGTTEDLTRLGIDQVADLPVGQELTEHPFIVLALPIPPEKAASPFGRTVNVTWRYSSGLADAGANDMMIIPNNGWLGIPGICIWQMHAVSRGKLLFTSRDPLAGPFVEMRMLTEQSDTLRAKDALERVGELVHHRAFAAILADKPELPSAEELPNVTFASHHVATTARMGSPYDTTTVVDPDCRVLGVDGLRVIDQSVMPEVIRGNPLLTVLMLAERMADRIKAART
>c734
MANLQSRKAPVDVVVVGCGAGGAVVAKELGEAGLKVVVLEAGRRFDPAIDYPTDQHDFVKSATKIFFEPPDPRQNLYSAGGEEGFVFTRAKGVGGSTLAYQAQVPRFHESDFRTRSEDSVGEDWPITYKDLEPYYTRVEYELGVSGPAPGDANPYDPPRSKPFPNPAHELSCASRVMQRGAKKLGWVWVQIPLAIPTQPWGGRPPCIRAGVCGYGCRIRAKSSMDVTYVPKAEATGRVEIKPNCMAREITVGPDGKARSVIYFDSEGAEQEISARAIILAGNAVETPRLLLLSTSKHFPNGLANSSGTVGQYFMEHLSSALTGRFEEPLDPWSGPPGGGYTQHFYATNRDHAFARGWQIMINQDWSWPQAVAMNNPGWGSAHKARVKNLIGRSFELSACGEQLPDVRNRVTLSATLKDHRGIPAPHITSEHRENDRNMIPAFTKSLKELFQAAGAREIFEPEDHKPGTSAHYMGGCRMGMNAGTSVVDRWCRTHDVSNLFVADGSVFVTGAGANPSLTIMALANRTADGMIASFKRGEL
>c735
MANLVPSPSDLPDPSPAVDSTLHSTIDAATLDVICALVDTVLPGIRVSTSEAETDGHANQDIETRESLVISRAEFDALYADARKNRSQFPSKAEFAEFLAEKPADNGDVVNSVCRTIEGSGPKQAKEMFFIAWLLSSRIGSFIFTGSFTPFQRQSLASRQRVFKSWNASYFSMKRQLSKAFLMLAQRPYLQYSTLYAKTIGFTPVSPHYVKTTSYPFEFVQFDSSRPDVLYTDIVIVGSGPGGGVCAKVLSEAGYDVTVVDKGFYYPSQNFPMSQAQGEHHLFENQGAVMSTSSKVTCIAGSCWGGGGTINWSVSLRTQDYVRREWAEGDKLPFYTSKDYDACMDTVWEAIGATTDYDKGPRGPILLEGAQKLGYKAEYLALNTGHDKTHYCGRCHLGCGSNSKQGPMTVWLPQAAKNGARFVEGFQVDRVLFGDDGKTAVGVEGVWKLRNRSAGDNAYTRNPIIGTNLHIHPVGLVIGRFDKEIIPWEGPIMSSIMTSLENQDGSGHGIKVEPSCSLPFTAFIGLPWYPGTAHRMNLAKLPTLAPYVVFARERDPGSVTVDPLTGRPQFNYTPSPYDAHHVLKGILATARIVYTQGAREIIVGIPNLPPFIRDDAERGVRSGPVYNGEETSLLGSNAPKTAAERADAAFEAWLNRVESVGNNGEGTPWFTAHQMGTCRMSGIESKGVVDPTGRVYGYNSMYVADASVLPSASGVNPMVSIMATALHISKGMV
>c736
MANMASTLGALCTLVALFPAIVTSIPLVPRFVSGNGILDAYDYVIIGGGTSGLTVANRLSEDSSKTVLVIESGPMDDGSESFRVPYLGRGYLNFGTKFDWNISSVPSQSLGGRSIIMPSARVLGGTSSINGMQFAKGAVSDYDAWEELGNEGWNFESLAKYFRKSENFTAPSEKLVKEFGVTYDKSAHGFTGFIHSSFPRFLWPQLKNWVGAMKSLGHSVSQDPANGGALQLFWSPLSLNPDTQTRSFSREYYDGAQDRPNLHVLLDSTVTKLLTSGDERVRVDAVEFLSSAGAQNGCVKVKKEAILAAGSIFSPQILQVSGIGPASLLKSLGIKVVVDLPGVGANLQGHVYNVIFYQMANASLAATNLTTNPTFYNEMHELYKTKQDGPFTNNGANMIAMLPLSDITSDNLQNLFEVPSKNLSHQDTSLSKGYQAQLKILHHRLTTPNMAATEVVWLNEGAMIFSVMHPLSRGTVTTTSSSLLAGIPAVDTGHLAHPMDTRIFVETLKYTRKIAATDEMQKLGLIEVTPGAGVNTDEQLEKAVRDMSNQMYHMTSTCAMMKRDLGGVVNKDLKVYGVRNLRVVDASVQPLIPAAHVQSTVYAVAEKAADLIKAGDS
>c737
MANNHYDAIVVGSGISGGWAAKELTQKGLKVLLLERGRNIEHITDYQNADKEAWDYPHRNRATQEMKAKYPVLSRDYLLEEATLGMWADEQETPYVEEKRFDWFRGYHVGGRSLLWGRQTYRWSQTDFEANAKEGIAVDWPIRYQDVAPWYDYVERFAGISGSKEGLDILPDGEFLPPIPLNCVEEDVARRLKDRFKGTRHLINSRCANITQELPDQDRTRCQFRNKCRLGCPFGGYFSTQSSTLPAAVATGNLTLRPFSIVKEILYDKDKKKARGVEIIDAETNMTYEYTADIIFLNASTLNSTWVLMNSATDVWEGGLGSSSGELGHNVMDHHFRMGATGEVEGFDEFYFKGRRPAGFYIPRFRNIGDEKRKYLRGFGYQGSASRSRWEREIAEMNIGADYKDALTEPGGWTIGMTAFGEMLPYHENRVKLDQNKKDKWGLPVLSMNVELKQNELDMREDMVNDAVEMFEAVGIKNVKPTRGSYAPGMGIHEMGTARMGRDPKSSVLNGNNQVWDAPNVFVTDGACMTSAACVNPSLTYMALTARAADFAVSELKKGNL
>c738
MANNQTGQNHKRTYLYVLRLLGYAASSYIVIRGLASLGLPPFASLFAATRRKLSIEEEYERLFKGDFDYIVLGAGSAGCALASRLSEDPNCKVLLLEAGPDSKDMLAVKVPGLFTSLLGNYTTDWKLATVPQKDTFSRVHSLARGKLMGGCSAVNATVWVRGSPEDFEELERDYGNKGWGWDIMKRIYERVESVQIPKDHVGGGRGYDGATKISHSTNNRPAALHFKMVECANEAGIGSSPDGTSDTKRQVRLDHKTFGVDYNSENQFGSGILQSNVHNGERQSTAHSYIYPYTNPKLANYRPNLTVFSGVHVLKVLLEPNPKTGKLRADGVVVKISKDTTGTERKIRARKDIIASLGSIGSPQLLMLSGIGPKEHLKSVGLQCLKDLPGVGENLQDHLFSWLHVENLDKTVYTPRRTSFLLWSLLEWSLFRTGMFAGNVILESGSFFNTKKYVERQKKVKRTRPPPPNIQFHMGGSFQGDPNFVGMYSSAVVEPFAGSPSGFDAERAMSESMYLSRDQMSKVPDSSTIWVTFIKPQSRGTVRLRSANPFDKPIIDPKYVNHPDDIEDFADGFEDARRVVDKLQQKYPLTFGREVHDAWIVNELLRVHPEWSREKAAASREYIKAYIRLSCQNISHPTGTCAMKAEAAGGVIDSKCLVYGTENLRVVDASVFVNIPAGNTNAPTIAVAERAADIIRGI
>c739
MANSPSQTRGAICSLDEFLQVSFDYLIVGGGTAGLTLAARLSEDPSVTVGVIEAGKDQTKNEFVRTPAMFPQMLGIPEYDWMLETVPQKWNGNKVHAMTRGKMLGGSSATNGMMYVRGHKQDFDDWSAFGKGWSWSSVAPYFRKHESLEDNRSGEPGDFSFLNFGEKSHGESGPVSTSFNNWRNPLERYFIEAAKTASGMQNSPADPWGGDHLGFFSSLLTVDRSKDKGTRSYAASAYLLPNASRPNLKVLTEALALNVILEGNSAQGVRISHTGREYDVRATREVILSCGTYKSPQLLELSGIGNPSILESAGIKCAVPLPGVGESLQDHVLSATTYELKEGTVSFDSLRKPEVLQQHLDLYAKERRGILAAGTGCMGFLPYSSLVSPQEVTTTCDKVQQIPNTTSFQQRQLEQVASQLRSPSSGNIQYILFQGTMNVDEVIQDQGKFAKPGTPSDPDGFTLVTCLQYPASRGTVHITSSDPTKNPAVDPAYLSNSADVDVLAAAMGMCEKIVNSAPLKDKIQRRMHPAPSVQLGDREQAKAAVRDFCMTEYHPCGTCAIGQVVDERLRVNGVKGLRVCDASVFPGNVSGNILSSVYAVAERAADMIKEDGSKAKALL
>c740
MANSTPLPTRLAPPPDGQPFSTAQWTTLLSIMDTVVPSVGKITSHRLGDDQSRQLVTEVEYSALENHVLERVTDAPRGHDLEAYLEERPSSNKDFNELLLRTLVVYSPPSMQASLKAVLSTLNTRAGSLVLTGSITPFYLQSIANRTSILNAWRTSRFASLQVLFKQMTLLGKNTWIKTSPTVYRMIGYPEVPPDHQPGNQYEFQFLQLPPGSDTANITTEILIIGSGCGAGVCAKNLAESGHSVLVVDKSYHFTSSYFPMSESTGFQQLFENGGTIQSDDGSIAVMAGATWGGGGTINWSVSLQTQDFVRKEWAEEKGLEFFTSEKFQESLDRVCERMGVTADGLRHNHGNRVLMEASRRLGAHVKAAPQNIAGGDHLCGRCTLGCASAEKQGPAITWLPDAAKAGATFMEGLQVDHLLFDDSKSQKTVIGAKGVWTSNPQSGKDKVTREVVIHAKKVIVSCGSLWSPIVLLNSNLKNKHIGQNLHLHPVNFVTAVHKSDVRPWEGPILTVVDSSLENLDGHGHGTKLEASCMLPSLALSFLNWSTGLDFKAQVLKYRHSNSYISLTRDRDPGCVYRDPQTGKPRIRYTPSNFDRRHTMEGVIALATRNFICGAEEIHVGFPGVQPFVRNPDPSFPLSFESQSPSPAQGEEDVNVRFSAWLSKVKSAGNAPPAATFASAHQMGTNRMSSKPSLGVVDVKGRVWGTEGLYVADASVLPSASGVNPMVTTMAICDWISREMVHDLKRKQRLAATKL
>c741
MANSYDYIIVGAGSAGCVLANRLSADPSNRVLLLEAGPRDWNPFIHMPAGLAKLVNFKSLNWNYSTEPEPALNNRRLYWPRGRVLGGSSSINAMCFIRGHRSDYEDWAAAGNPGWGWDDVLPYFIRSENNQARGASELHGVGGPLNVEDLSFSNPLSEVFIQAAEQAGFAANRDFNGPAQRGFGLYQVTQRGGRRCSTAVGYLRPARSRPNLTVLTGALTLNLEFAGNRATGVRYQRRGMIRTALASREVLLAGGSINSPQLLMLSGIGPAAELERVGIDVRHDLEEVGANLQDHLDVCTLTRCSQPITYDQLSEIRVGLKYFLYHEGEGTSNIAEAGGFLVSGRDRDDRPDIQMHFVPALLDDHGRNRLPGDGYTIHACPLRPQSRGRIGLHSDDPRQPPAIRANYLSEPEDLEMMIECVRLSREILNQPAFKPFRGHEIYPGNEVETRDAMIEFIRTKAESIYHPVGTCRMGSDKRAVVDPELRVRGIEGLRVIDASVMPTLIGGNTNAPTVMIAEKAADLILGRAVARPQEAEAEAA
>c742
MANVRVLLPLLLTVIKPAGCTAVYDYIIVGGGNAGLVVASRLSENANVQVLAVEAGYSALNETDSSFPELSQGNNVKTRMMAAGKGIGGSTIINETFGKFDIPLNVDTASGKTRGVSASPRTVTPGNEAVLDVRADSARSYYYPVQGRPNLHMMAGTTALRLLWEAPKTPEDSAVANAVEVVLPNSERKVFIATSDVIVACGAFRTPSLLEHSGVGNPSMDQVLTLFFFNATSPSENPLTPSYPTIADLYSPNATAFASAIHSALPSYAAVIVASNNDATPAASILRYLELQHDLLFNRAVPCAELQHGTNGPNLTAQARSTMPFARGSVHIRSSDPLAAPSIDPRY
>c743
MANYIDARTTLPAEIQADVCIVGGGAAGVTLAVTLARPDLKVVLIESGSLQLEGETQQLYNARQTGLRYYNMAACRLRYFGGTTNHWSGYCRENDPIDYEGRPDMGVPAWPITYDEISPYVKKAISVMRLPAAEFDPFVKAARHGVPRERLIDSMSDDFETKVFQIVPKRRIHDLHGEALAAQGALDIYLHANVTHLQLNPQANRVVSATVKTLGGTASVVKAKAFVLCAHAVENARLLLASNDVMPMGIGNRSDHVGRYFMEHANVQSGLLFPSAKFPVLYNYRWATRYDTNANLGFSAKAMRREKLLQYYCRFVPIPLDQTMEGAYGHLIGDFWSRGSLATIEALKTVAGDMPGAARFITSRLRDGVPPVAAYELDHRIEQAPNPDSRVTLGPARDALGVPEVVLHWALNDLDYHTFSRGQELMRESVERLGLGRVEAPPLTPERIRESVKGHFHHIGTTRMSARPEDGVVDRDCRVHGVGNLYVGGSSIFTTAGYSGPTMMIVAFALRLAEHLQTTWKRA
>c744
MAPAFDFIVVGTLLLEAGDNLEDRNLRVDGQRWLTFQNKNMNWGYQTVPQEYCNNSELDYSRGRGVGGSSAINFGVYSLGARDDYDKWAKIVGDDAFNWDHIHARFKELETFHGEVPAGVDKKYAVPKAADHGTTGPLHVGNAAEWEKDLVPTLDIFEQAGFPLNPDHNSGNPIGMSVLINSAHKGLRSTAKDLLQRQAQNLTIMANSPVQRLLIEDKKAVGVVANGTRCWFKIDGLTQTKEFEDLPSEEQEYLQEVTVPHFEIFTHFPIHWPVARLHCNLRIQTSLCAWIQNSSPTPLIVVLQLISLRDAFRIAKHPAYIKDKLAELAAPKSNSDEDLLEYWKQNISSSWHIICTAKMGKARDADAVVDCDYRVMGIDGLRVADMRVIPVLVSGHIQAAEYVTGDACAEKLIKEYNLA
>c745
MAPAPTPTFTPEAPPAIIPNASSRSDGFSPGAIIGIVIAIVCLLLAVPLIAICLRRYEKTRLRETPKSPGSSNISLRSVQEHHSLSSILVTKELSRSSIRMERVDSGIKRPDEVYENGRERERGWSCTEVRDYPSYTNNNSTNFTGLAGYAAYFNVDDVFESDLAAFNASVASALKQYADRTANASGIIDSSVTEKLFRIQYDLIFKNKIPISEIIVSPAATGPITIEYWGLLPFSRGSIHINSTNASAPANINPNYFMLDYDIRQQIATAKMARKFANTAPFSNALSSETTPGLDVVPTNASDAVWEKWLKSTYRSNFHYISTAAMMPRELGGVVDSNLTVYGTSNVRVVDASVVPFQICGHLTSTLYAIAEKAADMIKARYE
>c746
MAPAQEHYDFIIVGGGTAGCLLAHRLSHSAAAPSVLLLEAGTKPSGPYLSAPGHRYTAAFARSDLDHGYVSEPEPSLNDRELPYARGKGLGGSSILNFGVYLYGSSEDYDRWADLVDDDDWAWSSVQESFRTIENYATEGAAAYEHLADPASGRHGTSGQVTVSLPAVLEKSVAPQMASLLAAGESLCLDPNAGDNIGVSLFPYSYGKSGRCTSAIAHLVDPPKNLEVWIDATVGKLLFDGTSVIGIRTIDGREALSSKEVILCCGAIDTPRLLLLNGIGPKAELEALDIEVKRDLPGVGKHLRDHVAGIMCVEVDGSFNDRTTFETDPNSVEEAQALWDRDHTGALSLQHSSLWGGFLKVPDLANSSEFQDLAPADQEFLTRSKVPHFEFLNNALLWPPGSQLTPGNTYLSFTAALMNAQSEGSVTLRSNNPADKPLLRLNLLSHPYDVLVIREAIRRSWNMIIKNPDMRPHVRKTLSGPASLSDADIDAYAKAEACPIWHANGTVRMGKEEDGGSVDSSGKVHGIQGLRVADLSVCPLTTNNHTQATAYLVGQKIAEKMAEDIENKAEYLANVKIGTPGQTFTLDFDTGSADLWVWSTELPASTRNGNHGGNKHSIFDPKKSSTFKESSGSTWQIQYGDGSTASGDVGADVVNLGGLKVQHQAIELAKTLSTQFASGPGDGLLGLAFGSINTVSPSPAQTVVENMITQSDIPKNTELFTAYLGSTPPGSSSPSANGAATADATSFYTFGYIDQTALAGQTPAYTPTRKGFGCSPVNLVRLEIRRSGWVFPNSTDLSSLPAVRLAIGDTLFTINPEELPFQDLGDGTFYGGIQSRGDQTFDIYGDVFLRYYARSVQTSWTS
>c747
MAPASSTSAYPSSSSQSLSHSTPASKSSSHAHPQKPRLRLPMLPELVVQHYRHLVGRHHPFAAYPHSADAHRGSAYAYAYTSSSITSCGCSSVAVASASDGPQTLPVFHRVGSNPRHPTPSSSLSCGRPAVVRVPTIRTSTNTGGPHHFPAPSSPRQRICSGPPRTSRRSSTKTRSAFASSTSLPSDSSRLSTVTTALRSPTVDYLGAPSVAPPVVPCIKRTEGKNEATYEFVDRLPKTSLWLETLAGPELGWVRALATSTTVVQGPSYFDNLIKRLLAPRTCQKTVVGYGVGKPISISVFGAARSYSKLKKSFKAVEINATRRHQRIKEFIRVVVRRRAVAPRDRHPPYLYWSRDHYRVGRCRRVLRCRQQRGRVILCCAHERTRTVKTQTMSKSAAEPTQNKSSDISTPLHGALLVEKAGMHFPYESMVAQHAANVTAFTELRHNFRALRHRSSLATSQGLQLLRLQGDKMAALRAHIRQKMEEHDVEVTAVLKVAPGPGACAEGLEYRTTRFKTISAGASVPTPRYPGPHDWRTDAILAKVEXXXXILERSGVGDAKLLKKLDIKVVSDLPGVGEQYQDHYTTLSIYRDFLRASDAVGIPFSDDIQDLDTSHASEIWAKYINRHTGRRSDAATAYVHSVMDVQNNLYLRTNSRVSRVIFEGNKAVGVAYVPARNRAHGAQIQETIVRARKCVVVSSGTLGTPQILERSGVGDAKLLKKLDIKVVSDLPGVGEQYQDHYTTLSIYRVSNESATLDDFLRGDKDVQRELFQEWEVSPEKARLSSNAIDAGFKIRPTEEELKEMGPEFNELWDKYFKDKPDKPVMFGSIVSAAYADHTLLPPGKYITMFQYLEYPASRGKIHISSASPYVEPTFDSGFMNNKADFAPIRWSYKKTREVARRMDAFRGELTSHHPHFHPSSPAACKDIDIETAKGLLPNGLTVGIHMGTWHKPGDQYDASKVHEDIKYTKEDDEAIDNWLADHVETTWHSLGTCAMKPREEGGVVDGRLNVFGTQNLKCVDLSICPDNLGTNTYSSALLVGEKGADLVAEDLGLKLKFPHAPVPHAPVPKGIPATQMVR
>c748
MAPEITPELLEDLSNDLGPDVEILADKNSARFKEFSKRWTDIDRETPGAIVLPDSPSLIQKTVRWAHRSSVPFVAKSGGHSQWSTIGEHGIVIDLSKYAAVSVDADAKTATLEGSILSKDVAVALAAKGFFTALGNGNTVGAIPYFLGGGASITTSITGYGSDQILAARMIDATGNIIDVTEEDEPDLLYALRGAGQFFGLVFELTIRATPLAKLGNDQGLIWAGAFIFSLDRAADVARAMNIVVNDSSQATAGLMMVQAPPPARDHALVIAARYTGNPDDAKTAYKALYDLGPLVAKGGPVPIQNPSDGREVLQSKGDFKKFGVVGLRRFDVDGFLGTIDVWKTLIAECPDAINTSFNFQWDSRPAKEPSFESAMSLHDIRFWQNNLIWHTEVQNRERVDELNDQSIALMRGTDTSEFADFQNGTRTGPISWRFRGPGKLDKLKALKRSCIFDVLQKSQLVLSAVTPYEQPAKTEVGELRCRVSDMKVQGYGWHAVSVIPLNAQPSECLSKLWQVYDYTMGSRLRTTLNVVVSAGAFQSPQLLMVSWVGPAKTLRKFGTPVVSDLPGVGQNLQDLFLFGATYEVNVLTHSAVSDPTYRSLAQEEYNINRTGILTNPGGELIAWDKLTCQSKRSCGTLTSDTRKILNAAPSDWPTYEYLMLDAYSGDNMDYQRGSPKNTKMHASPAGSVMIPQSRGTVTISSTDTADAPIISPGWLTHLGDQELAIHGFRRLRQMMDTNIMKKDAIRRTGIQLFHASSTCKMGKASDPYAVVDPQARVFGTKNLRVVDVSVLPFLPPGHPQATIYALAEKIADSLIAKT
>c749
MAPGPREAPWQTEARSKDRLVGARPAPSNFDVEGYEHIKDLASHVAPPHHTNERKWDLVFRKSLSVPSQQHQDPQQYQYQTPPASPRPKSLWPSSLAKRSSNSKRGSIEGQYAGAPVLIVEPPHDDQVPVESQYRITARTNHDLYTVIPSGGDANTTIHSSPYGVISTRDVDPTADHPTLNQQASDLTLNNNASPWPENTEHQHQTPELSLNDTPSLSPKRNERKHKPWQLFGSKNHEPVAAPVDTDSSEVSQVRFDSTPTPSETREAAATAAASSSPRKGNSRSRALEREMARAARGNEDSAFLPQSFLSKRLQRKMPKENLKDEPVVNATNMEQLPPIASPYPIASNVPTKNALDLSPRSSLRNSSANAKRKSINKSLGIESPHPPLPVLPNKHVFSDPQRTALTALVDTYISPLTALETDILVESHLSHFPPPPGETLDSYRDALKAFASMSASELGAVEGISRVLVGGPAGSKREYDRVLVSRLLSTLANPLALWSILPNKLVPKDMRWKPFASFSRNIREEVVIGMTASKTRWVQEALLLVSSLTYNIVYSKAQMPGQQQQQQQQQQMQHQEQPSTTETTDTNIVVDTSKNPAWRTMGYEGPVVEWERRHVQSGGGGFRFIDVEAWGEVQRRRASFLYAGGGFVQGWGLKRKPIEFECDVIVIGSGAGGAVVAAEVSKAGYKVIVVEKGMYVTPSRAAAANVDLEVEMFEGDNLMHSEDLKTTVLTGSTWGGSAMVGWNACAAPPAEILSTWAKAFNLPKLETESFQGSLSYIQSRVQAATKTPAPRSASEILKNGATTLDYSASPIPISEHGHDPGSFLKEAGDFGAIFMEGVRATRINRSRPHGKATGIEGVLITSGTRIKITASIVVAAAGALATPRLLQASGLRNPNIGNNLALHPSTLVLATSMNQVVERVDALSYECTESPSISITTPSLSPSVLARMTPFVSGFHHKLIMARYRHLVPLMVTSTSRHVPHLNATKNTNCPKLIAPITPSETTHLVKGALVASALAVGAGANRVWSMQSGVEEYKVSPNDKSNLTRGPFWEWQSQVNRAGLGPVISTAQSGTCRMAGSDDMGAVNPDGEAFEAVNLFVADASLLPTPPGVPPMLTTWTLSHMVAQHVVERLGHLGVMKEVDLEEAGMVRNRIVVQTASKLAIRTLQRAGPRISSSLCVEAPSIELQQKRYASWSSINDNYTTRRSKRKELTSGSSNQASSTDGVQSDEHPIPTFVDFKPHGELTEDVGNKSTYPYYISQATINTLRALIGSQLSPYGAGNPKCLVLSCPHVGAGKYLDATIRAVAREQHAHVVVIDYPSVVRGVKLVQKAKKPQQQQQQQQQQPWNSFATFPISKSFSPSNFEPVNSNVVASDEDGANDDDDIDLYEEFEDAYDEDDRKNVTNLAREFQRSMPVRLNLTVRPDQSIVLAEPGRNDIVLSFQQTPPPSDGRTTSSSSPPSSSPLAYYAHDLSQLEIQQSVRELGNFLVATSRASPNNNIIINIRDLSDALQYGGNSGQYFVQSVLDMMTALSPHLPIVLVGSCHPSIFEAGNLSKDAAFYHLLFDGGATPKDSSIPSTAAARSQCGGLNLWHDNQLFASPIDQALDSFTRIDVPPPYSRLFAPESHAEMEVALDKWLSRMELDMRREVAETNWTSIRMSCLSRGVEFSDGASVTPPGRESHRLRVNKPILEQYVWPLEKIDRLVALAVGQSVTGSTQRSRDTPIVLSHHHFIKALTLIQDGDVSQIANERFGETEQTDDKLLPTTTNPKGGRGGAGSNTVVVENTAVNRTPVSGIPPATATTQAYQQQSTAAKTTKDESSRGLKSTLQYLKSRGHEVSAYEKKMLSTVIDPTSISVTFADLVLPAPTKLALQTLVTLPLLRPDHFATGILSQHGHNGVLLFGPPGTGKTLLAKAVAKASGARFMALALSDIFDKYVGEGEKHIRAAFSLARKLAPVVIFIDEIDGIFSARRGDGWNASRREIINEAMSEWDGLNSDNKGVIVMGATNRPFDLDDAVLRRMPRRILVDLPTEAQRASILQLHLAKENLDSSVSITDLAKRTNMYSGSDLKNLAVAAALSSVKESVMREMLGPEGADMPRAEVLSKLDSMEGYNESLMTVANTAGAASTSERVIHIEHFEKAFSEISASISDDTQSLVELKKWEQQFAKNGIKVPKSGYGFSFNSNTIKLPSRKVVEEPLADEISKYKEIVVTDLIIKIDGAQVERNVHKLILLGQIEARNRLSDYCIDACSLEHQDTITLKPETTETELDYLIKAAYNFGFDFPEGWGLQDVFESEALSDVTITVLDHNDNIYELPAHRLIITTRIPFCRALFSSPWADSSSSVIKLDETCVTAFTLPFILKYAYGIPLELPTTSAELQAIYSGADYLGMTGLCSRIISTLYTHTTDTEILRLARWAKDVNQPDIINDCEKVMIENFEAVCKWSKTTFWTLSSDTELRSAVIRAVVDGITVTNCVSYLGMAVRIPKSISGKSQREAMNIRDACDLIRTRAKDTIVASFPEVCEKSSYLVRLVGGAGFGAEYVEETLKAVTASLKETNVISHIQTIQRLRERSFASSGRSDVRDMVEEAYNQCIQYATRRWISLKQKGAFVEPETLLQDDHLIRNGTGRILGEETRGIRPVLLDADRTQRPATAPVASPTRSGIVIGSRVLVAGRSGGPGVVKFIGTPRRGLGEFLGIELDEAREGRGGDGSIDGVRVKPAAPPSPTASSQKNMSLRDLRGHGPYEPSREIGQDGAGSRMGSDGNLRGSLTRGQGKTLGSIVSDFGKKLSSRNLGESMRNVSSPKTAEPELKSAVSLPRIAPSTPTAATPEPKEDEETQPLARRESLSKKLRARPTKVDLKLRNILRVDSQDSMTDLTNAGPLEKSLNFERRSEQLRSILKARPAKSELHDMNILRGGESDINLFHEQERNRRQSLQDVLEGKLTNRPRIDEIDAKILNFAETVEVLPTFRKSEYNRKPDGNATFRKLTPQLKVQIREELNQFKKNEMPVHENSRPNTCFH
>c750
MAPHDDGAPPEPPVTSMNGSVTHGPMPFPASCAGAPLVVFATMLIDVVNSRFEAEYQRRRKEDEARAVDEEYDFIVVGGGTSGCILASRLSESTSATVLLLERGGTEPEEARVPALQPYVWRSNSVEYPKSVSEQQNCNEYHSSSGPQRVSWQQYRHPVMHRLAKAMLHEGVPFRLDVNSRDQLGFTVVQTTTDGGERYSTYRCMDGSWRLNCVSVVAVALHPSSRGSVRLNTSAPTSAPVVRLGYYEKASDVDVVMEGVRRARRLAAPLRSLGLELMPNDCGGFPHDSDEYARCLVRTTSGATYHWVGSCPMGPGDKAVVDTRLRVHGLRHLRVADASVMPSLPSGNTMAAVIMVAEYAADLIKKEHVISH
>c751
MAPHTIESNYDLIFAGGGTAACVIAGRLSKADPNLKILILEAGPSTKDKLEHIRPGQYRMHLAPTSKTMQFYKSKPSEHVAGRAVVIPSGRCIGGGSSVNFMLYNRPAASDFDDWQTNFGNKGWGSKDLIPLLQKAETYEVDPTRKTHGSSGPIKASFGANTKMMEMAKQFLEIGPKFEKDRPESEEGNNFGSESVNVFYRMPKYISSAGRRSDTAHHYLYNSESKNLSVFDGTRVKRVIFEGTQAVGVEYVFDKQVYPDAEQTVHTVRASRLVVLSAGAMGSSLILERSGIGAASILGKFGIKQIVDLPGVGKEYDDHPFLITPYVVDANTETTEALSGKDPEQWSKLLRQWDTDGSGLMGGNGVDAAIKMRPREDELEELGPDFKEYWEKIFADKPDKPLFWLSALGGFPGAHSALPPLKFMALGCFLGYPASRGHIHIASNDIYAHPDFDAGFLSHPADVAALVWGYKKGRELIRRMGVYRGPFAPLHPQFPGGSPAAAALAESVPVALDAPKIGYSKEDDEAIATNIRNFVATTWHSLGTCPMKPREQGGVVDTDLNVYGVTGLKIADLSIPPANVNCNTYSATLAIGEKAAIIIANNLGIEGV
>c752
MAPISISLDELFAQAQSPHFKVVIVGSGYGGSIAASRLAPEKQPVCLLERGREILPGQYPRDLVGARKELQVITAREGPLDPDANGMMELRVNDDVHVIVGNGLGGGSLVNAGVSIKPDMRVFKSGWPRAYLPSDDEKPAEGDGEPEPPGNVLSAHFARVMTNLGAIELPEEHNPPKLQALEQSAAAMKQDFQRAEIXVTFEAGPNAFGFNQAGCTMCGDCCSGCNYGAKNTLLMNYLPDAKRAGAEIVTETEVTTXXPVKGGGWKVHVLDRSKTVDGQAXKXITADMVILAAGAVGSTEILARSKDVHGLPLSKALGTKFSANGDVLGFGFGANLPGSNGSDEAATPLYSIGAGSNLPLDHTAGSGSSVSPAFQPGPCITGVIRVDMADDKPLETGMVIEDGVAPGPLAAIYPPAFFLQDVLTADYAGFPDTQARLGALQGLGEALQSGGDPATLSYEGVMTQMQSYLLMSHDSASGNLTYQXPKXPKKLGYVHVDWEGAGSEPSFXRDNEKLXEASDAIWANYIANPIWQKEFGRNIVSVHPLGGCPMSDSDADGVTDADCRVYKGDGQNTIHETLLVCDGAVVPKALGVNPLLTISAITERAMDQLVGAPKKAEKRVDAGAAPPPXPDDPAAQGGLDLPRIAMGIGAAAXLAXTIAEACKAEEPNWKAILAEITAFLVGMIPDYNFNDVASFLXDVGXSIPSNENGTYEYGDLGNGFAQLAEDLRGLFLAGGESQSQGSLQPFLNAFFDALGDVSPSFGFDETMRGYISDRRVSQDDDISXPYEVAAGLGHAAKRSLQADFTVDAPSTLGRDAXGNVIASVTDAKLGGTVXLVAGEGEDPVTYTVTDGKFDLLVPDENAVETWLMTYTCTLTPEETAGTSWTMTGTKYLRRAPGSFWWTDLTTLYVDLEPVGPAGAATPLQGIIRLDLQDLAAXMETIRTGFEGAVAVSDLEDQATQAISSSTFGAAMAKPPKARRTSTXPTLLXSAFLTLLNKGATSGGDNWTSELATGLEAXFGAGIAQVFAGLVFRAYGGFPAYMEDFPSQSDDTLKALPEDGEEYGGSRLKVISLPKTDDDPPIRLFHFPPPDPDKPVKGPILLAPGMSTTSLTFALKTTETSLVKRLLEQNYDVWGFDSRLSPRVTPTQTDYTLDDVAAQDWPRAVTHVLGETKAESLQIVAHCVGALTAQMALLGGHVPTEQVRRMVLMQFTVHPAANWFNVVKSELGLAHDFSNGFPPFLSGIVQSELGDGPDWEAIKGLLKDGIPKINPVSPQPGTEGYRIPLDELHNSVDWNAPFGIDHVCYSPTCHRIYGLYGPVIAHKNLNEATHDAMRQMFGEIATRPFEQLGLIMERGMAVSSTGEDIYLCNPERLKLPIHIISGTINQIVQPESGYYTQQWLKEKMPGDAGLFTRTLIEGYAHNDCIIGKHADKDVFDGIMRVLDNDTAAD
>c753
MAPKNLNGVVDSSLKVWGTANVRVVDASIVPQHIAAHMQSTVYAIGNKAGAIILSGSSTGNTNDAVRGRLGGVGLSGAIAIFAGLEGYQYSVN
>c754
MAPKTATYDHIIVGAGSAGCVLANRLSADDETTVLLLEAGEPNEKREIDIPAGFPELFGSSVDWEYYTEPQEAMNGRELYWPRGKTLGGSSAINAMIYIRGHREDYDHWAALGNEGWGYEDVLPYFKRSERFEPGDSAYHGQDGPLNVSTPRSPRPLSKTFVDAAVETGETRTEDFNGESQEGVGFYHLTQKDGKRHSAADGFLKPVLDRPNLTTRTGAQVTRVTFDGDRATGVEYEIDGQRVRADADGEVLLSAGAVNTPQLLMLSGIGDGDHLREHGIEVRHDLPGVGRNLQDHLFAFVVHESTGASTLDDAGKLRHLPRYLLFKRGPLTSNVAETGGFVRTSPDEPAPDLQYHFAPSYFLRHGFDNPAKGRGFSIGVTQLRPESRGRISLDSGDPFDAPAIDPRYLTATEDMDALVDGLRKARDIARADAFEEHRQKEVWPGKDAETDAELEAHIRETSHTVYHPVGTCTMGDGPMAVVDDRLRVHGLSGLRVVDASIMPTLVGGNTNAPTIMIAERAADFILASDD
>c755
MAPKTATYDYIVVGAGSAGCVLANRLSADADTSVLLLEAGEPNEQREIDIPAAFPELFKSSVDWEYHTEPQTAMNGRELYWPRGKTLGGSSSINAMIYIRGHRTDYDHWASLGNNGWSYDEMLPYFERSEHFEPGDATYHGQGGPLNVTTPRSPRSLSDTFVDAAVEVGHARNDDFNGEQQEGVGRYHLTQKDGERHSAADGYLKPVLDRHNLTARTGAQVTRIAFDGDRATGVEYEIDGDRVRADSHDEIVLSAGAVNSPQLLMLSGVGESDHLREHDIAVHHDLPGVGHNLQDHLFATATYEATDADTIDDAAKLRHLPKYALLKRGPLTSNVAEAGGFVRTSPDEPAPDLQYHFGPAYFMRHGFDNPEKGRGFSIAATQLRPESRGRITLDSADPFDAPAIDPRYLTEPADMETLVEGLRRAREIARADAFEKHRGREVWPGEDARTDEELAAHIRETSETVYHPVGTCRMGDDPMAVVDDRLRVRGLDGLRVVDASIMPTITGGNTNAPTIAIAERAADLIVAGR
>c756
MAPKTATYDYIVVGAGSAGCVLANRLSADAETSVLLLEAGEPNEQREIDIPAAFPELFESSVDWEFYTEPQTAMNGRELYWPRGKTLGGSSSINAMIYIRGHRADYDYWASLGNEGWSYDDMLPYFERSEHFEPGDATHHGQGGPLNVTTPRSPRSLSETFVDAAVEVGNARNDDFNGEHQEGVGHYHLTQKKGERHSAADGFLKPVLDRHNLTARTGAQVTRIAFDGDRATGVEYEIDGDRVRADAQREIVLSAGAINSPQLLMLSGIGDAEHLREHDIGVRHDLPGVGRNLQDHLFATVVYEATNADTIDDAAKLRHLPKYALLKRGPLTSNVAEAGGFVRTSPDESAPDLQYHFGPAYFMRHGFDNPEKGSGFSIAATQLRPESRGRISLDSADPFDAPAIDPRYLTEPADMEALVDGLRRAREIARADAFEEHRGEEVWPGEAARTDEELEAHIRETSQTVYHPVGTCRMGDDPMAVVDDRLRVRGLDGLRVVDASVMPTITGGNTNAPTIAIAERAADLIAAGS
>c757
MAPLGTDSKAGVANASANGVHYSSGLNIVPASKLDLVSSTEYDYIIVGGGAGGCPLAAALAEEKSLRVLLLERGATRDQYPETKTIDGWYDLPSTDALQLTRTKDGVVFARANVLSGGTAVNIGVWGHASAAHIKEEGWDADAMRSAYEHLDARLSHPGLEGPFQDKMLEAFTEIGIKPNNGVTPEHLIGAKTIMRTWDKNNVRHPADELLVGVENVDIVTQALVSKIRFSGSDGTLRAVGVDFTSADGIPRSADVSPSGGEVILAAGTMGTPQLLMLSGIGPETELEKLGLTPRVSLPVGRNLADCPLNGIGIQTREAPERDVISVAGIQEDRIFFVSTGNGEPGTTKWGLMPMVTPGLRTNETMKTTAAAIGALPEELRAEMGRSMGVFFKLYRVKTRGAITLDSTDPAATPSIDYPYFTDPADVASGIEGIRTLKALLASKPVSELKVDTVPQFLLKLAPALAAFPPGQYPGALPLLPDPNDASEAATWLRNTVCTCWHMHGTCRVGEVVDDEHRVKGVEKLRVMDASVLRDVPGTNPMATIMALGRVLGLKMLKERVELA
>c758
MAPLINILTFLLLLTTPILSTPTPNSQATSAAANEYDYIVIGSGPGGGTVASNLARANYTVLLLDAGDQSTANTGGQYPAQITWDFFIEHNNYLPKGTAGHGFDGFFQTMMAKPSSVQNPGLAALNAAAASFGAQASQLTAMLSTDPNAVDPNRDQATGIFGLPSHTRSNGQRYSSRDYILDTINLKYPLTLSMNSLATRILFNTTGCTTKPRATGVEYLAGKSLYKADPRYSPSNKGILTTATARKEVILSGGAFNTPQLLMLSGIGPPDQLSALSIPLLVSSPGVGKNMQDNQEVPTVGQFPSAGMGSAGGCIMRKTPFAAYDERDVFIMQFPGVFRGFWPSNQTNTKLATDPQDVWTSSDEHGGDWGGWRCECGAGFKV
>c759
MAPLKHDIIIVGAGPAGCVLASRLHTKYPDYKILLVEAGQDVSKHPLIVGGAPVPHLQHSDLDWDYKTTPQKGLEGKVCAAAAGKAVSGGSAINACGWLRGDRNDYDEWASLVNSPRWSYTSLLPYFIKTETHHTRTASPSDHGFSGPMYTSAWIPSESSPPYPLREMVKKAWLSEGVNEIGDANAGSPLGIAALTENRREGKRQLASEVYPLDGVEVKTGVLAKQIVLSKSSDGTVRATGVESIDGEVFHGKEIIVSCGAYRTPQLLMLSGIGPKSALEKVGIECIVENEHVGKNLHDHFGVNQWWKLKNPELGLSYGHPKFSEPTWKTRIPLDFIGTTTVPIDGLKKALERDLGSKAPEDHPFLTHDRGHLETFILYVGANVSDPAIPMDGSHVRTRVIGFLPTSRGSVTLRSGKVEDDPVIDPGYYQTEVDKYVMRTGIKALSKMLTRNFGREFIEGETTPEGLKPVGADTTDEELDRKVAKDGDTVYHPGGSAAMGKVVDPDLNVYGVEGLRVVDASILPVPLASHYQACVYAVGEMAADMI
>c760
MAPLTFVALALSLVVWSFAVASPHPRRQTTTFTSTGNPILADGSVYSADPAPIVVNKTVYILSGRDEAGATENGFIMNEWQIFEAQSPDPSGGSWSLHQKVAQPHSVFSWAKTGTAYAGQIVQGANGKFYMYAPVTEADSANSDPFAIGVAVSSNILGPFTDAHASGPIITESVPSPGNTIQNIDPTVLVDTDGRVFIYFGTLGQLRGYELEADMVTIKGSVTIVNSLTGYFEAPWLMKRDSTYYMLYAANNAGESSPCTPTSYHACIAYGTASSPLGPWQFGGIVLDIVSSTTSHPGVYRIGDEWFITYHTRDAEGGTHFRRSVAFDKLEWDDTTSPPSILKVTQTRRPASADAPTRNIAPRAAPSSTSTTPIQYWIKAINDQRVEANPLPPDYWCSYAAEQSPQTSTLTYKWNATMQLNGATMAFFADQPAGSSIGVPPPASWKLEYLTSTGSWTEVSVTSSGGYPTTATDSPKEVSFQTISTTSLRAILTASGSAGQFGGVCITLASSDPKQSPVVDPNFFAKEADRASLRYGVCQVMRMLLDTPEGKDMVKNEVTPPDSSQLTLESTDAEIDDRIRKLGNSLYHSAGSLAMGKVVDTELRVKGVEGLRVVDASILPVSIAAHYQVCVYALAEQAADIILAAGSS
>c761
MAPLVGRELLPGRLYDVKASLTVAFRYGRAFAGSYYHPASSCRLGKVVDKDLHVVGVAGLRIADASILPRLGSAGPLGACLMVGDRAGRLLVQGGTRARGCEEDGKEGGREGGRAVPAKSATGGVSV
>c762
MAPMLPMEMIRKSFQSWYYWFPMLMYGFLGALSTYNTAWYEMDKMADKFKATYLDARDRFDFIIVGGGSAGSVVANRLSKHFDVLLLEAGGEPNPWFSVPAMSFMLLNHPGLDWMYKTVPQKWSGGALIDRVSGWSAGKALGGTSNTNFLIHLRGHPKDFDFIANLTGDQEWSYDGVLPHFKSVEDYNGEWKTDEFHGTGGEIPLQVPPFVGMAEYFIKAGEELGYSNVDLNARFSEGFSYVYYPTKDGRRYSTYKSFLEPIRNRNSLTIYKFSLVSKAVGVEYVRHGVTKTARATKEVILCAGSIGTPKILLRSDHISVYLGMFLINSTVSMVFDRDVTAKSFMDFVHKGTGELTSSGCSASAFVSTSYAKSSGEADWPDVQFIFLGNGVYAKMHTDMSHGFHVDPTIMKKYLSSDLVGKDAFQIIVSLARPRARGVMRLSGKSLTDDLIIDPRYLDNEYDNSVLLEGVKMAVHLVENTTVFRKIDAKFTSNVFPGCEDVPFKSDEYWRCFIRQYSITLHHIVGPCSMGRNDSKDAVVDTRLRVLGVTGLRVIDASIFPKVPISNTNSATVMVGEKGSHFILQVWGVNSTRTQ
>c763
MAPNGDSYDFIIVGAGSAGCVLANRLSADAGNRVLVLEAGGRDRDPMIQVPIGVGKLWQRQSHDWKFASQPEPNLNGRRIPIPRGKVLGGSSSINAMLYGRGSARSYDRWHDAGCGGWSDEEMRPYFKRSETFAGGADDYRGGDGPLMVGRSETSDPFRTAFLDAGRELQFPVVEDYNGSEREGFAASQFTVGDGRRWSASVAYLRPALGRPNLAVEVNAQSVGLAFEDGQATGVEFVQGGRRRLVRARREVILAAGAINSPRLLLLSGIGPADHLASLGIPCLRDLSGVGGNLQEHPAVTLVFRRPGRSRFLEGLRADRAALNFLRAYLFGSGPATKLPGGVTALLRSAPDKDHANIQFLISEVPPDGDLWFPVLRPPAEDGVVCRVCLLSPESRGRLTLASADPLEPPRLAYGLLDAEADRAALRAGIGLLRRTFAGKALTALGLREFVPGPEVASGEALDGFVRQTATTVHHSSGTCRMGTGADAVVDPQLRVIGLKGLRVVDASIMPEVVAGPLNAPVIAIAEKAADMILGRG
>c764
MAPPAASLDGLPTSTLAHPLLQGGRPPYAHKFSKAQLEALEALCSTFVPQVSSPDGSHREFYELSGEADAEMVAGRMTQFIHPKLLRRAEEVLGMLSTPKSTPQYPYDKKFSEVPLEEREKLMYQWANSDDDDSRLNFKIFKTFILNTVYSKVDAKGYNPTWEAIGYAGPDPNSMKATLPPKPSALKSAVFDVREHPDLRGVLKHTGYTLLDDISHLKPALLPSNKLEDGEDVIGIKCDVIIVGAGSGGSVPAQVLSTAGLKVLLLEKGRYFAREDLSLLEQPTFSELYEEGGFLATDDVAYSLMSAAVVGGGTCINWAASFQTPPHVRQEWAEECGLPMFTSEKYQQALDLICKKIGVQPNATVESFQNAVLRKGCVELGLHSANIPRNASPEHYCGCCNMGCRRGMKQATTETWLVEAAAAGATILTGTKGLQVLFTDGTKKEKKAIGVLATTLGDQPKKLIIEAKATIVSTGSIMTPPLLIRSGLTNPNIGKHFHIHPVLGVWGYFPDEEKNPGASFEGGIMTAFSAVSARWDTVGYGPVLMTPSFHPGQYASVVTWKSGAQHKEAMRRFRRVSQVVLFTRDKGAGSIGVDKKTDEITIEYTLDPYDEEVCLEGAEKGLRVLKAAGAVEVGTHHHDAESFTFGKSTSWKEEKKRFEEYLASVRSKGLKPNRLPMVSYHLLGSCRMGSSPENSVIDAKGETWDAEGLFLTDASVFPTPTGLNPMVTIQSIAYCTAQNVVEHVKSSK
>c765
MAPPAVPPPSSRSTGTSANDIDGQTFDYVIVGGGTAGLAAAVRLSEDPSVSVTVLEAGLWRPEDPKIDYPIMMAQVFGDKNYDWCIKTVPQTNANDRQVDWPRGKVLGGSSALNFMVFQRGHKREFDDIESIGNPGWGWDAMLPFYKKTVNHAAPVHLPDPHLAYLDDDAANGGGPINTSFSCWYAEPHKFWIQALQKLGLQANKSSQAGANAGLWASSGSIDANTGKRSYAANSYYAPVASSRTNLKVLCGALATRITLSDDAEEPTAEGVDFVMEDAPTKRLTVRASKEVILSAGTIKTPQLLELSGIGRKEVLEKAGIKQRVDLPGVGENLSEHIYLGCAYEVQDGTVTWDKMRDAEFAAQQMQLYTGKGPDKGLIGSFVSGFAYFNLQNYLSPEDQKLVHQQIDETDQTGWSSGMKELHALQKKRYDDQTVPAMEQMFAPGFFAHSGPPKEDKSYFTLLSALQHPWSRGSIHVKSDDPFAHPDIDPRYFSSKADLTILSKALAWNDKVVSQDPLKEVVNVRQEPNPELVNEKHEDWENAVKGSFQTTYHHLGTASMMPREKGGVVSPSLQVYGVKKLRVADASILPCQLSAHIQATVYAIGEKLADILKKEQSSDVQKLDIAGISISA
>c766
MAPPDVPADVEADFVIVGAGSAGCLLVDRLSADGRFRVVLVEAGRRWRDPLLSIPLGVGAVWKAPRYNWSYRSQPEPAIGGRRLFLPRGRLVGGSSMINAMNHVRGNAADFDAWAALGLPGWSAAEVLPLFRRLEDYSGPDPDDLRGRSGPLAVTEASHADPVVDAAFSAFAAAGHTALADYNGARQEGFGRAQFNLSGGRRLGADRAFLSPALRRPNVRLLTGMRAEQLEIAPDGRATGVVCRREGQRHVLRAGREVVLATGAFGSPALLLRSGLGPAADLAQLGIRLRAHLPAVGANLWDHPRVAVEFRRRRPSQLSGVMRLDRLAAALARAALTGRGPASEPLAAAHLFACSRPGLPAPNLQFLLRLFNPALGPRLPFVPPAVSDAFGLVACLVHPASRGRVRLVSADPADPPAIETSILGARQDVEDLTEGFRMAQAFGSHPALAAHHDGPLSPSSQLVEQGEIEAFLRASADTIFHPAGTCAMGPDGAGGHGQGAVDSTLRVRGVRGLRVVDASVMPLPVRGNIQAAVFMVAEKAAGLILDAARAQG
>c767
MAPPIKPSYDYIIVGAGSGGLVLASRLSEDAHHNILLLEAGPNRMGSPEVETPGPAVALYGDPRVDWDYLSVPQVHANNRQLGQPRGRIVGGTSAINFSVIMYPSRADFAAWQSLGNQGWGPDSMAPYLRKFQAFTPPRHATTNSCLKPENQGTDGPIPVTMSDQYTEMNKAWDETFAKCGWYNEDDPINGKKLGAFLAPVSVDASTGRRGYAAAYYSPSVAKRPNLQLLPNAMVCRVLFTSELNGTVRATGVEIDTGDGEIRTVAASREVILCAGSLGSPLLLERSGIGSQELLQRQQIPVVINRPGVGENLQDHCLSVSTLELAESYSSVLAPGTPMSTACLPPVDSHGLLSREEVEGLLDQHLSHPAGGSQEALSLGLEKQHALQKQMLLDCEHPSSQYILMPLGIHTQPCINTILDVLSPSLTQTSKQKSISILTLLNHPFSRGSVHIQSTNYNDRPVYDPNYLSQTLDLEILARHTRFLHHLTKITPLASILKGACVTGEDSAEQPHDIERTKEMVRNHLFHCFHPVGTCAMMASELGGVVDPQLRVYGTSNLRVVDASIFPLLPVGNIVAVIYAVAERAADIIRGQC
>c768
MAPQDLHDMGALFSKSYQTDPSTSWRINHMTVSLLAQARRGVYSPIDFRKSRRVRPPNRSWSRSIRSYPSGFRKTLQVNPIHGITNAQSNTNINGTAFSWIFYSTPQPNLNNRKLYLPRGMMLGGCTSIDAMMYHRGAPTDFDEWEKLGAKEHPSRFFRSSEKFTPHALYPGLKPEDHGDSGPPGRHPTHIVVIFLSRAWLLSMSDVNTSRGTLGATKIVTFIDAKGRRSSGATAYLNVNLVARKNLTVAIKTLTTRVLLSTDTVPRAIGIEVAKDESSPLLRVSARKEVILSAGSFNTPQILNLSGLGAKEELEKFGIKVVKGLPAVGKNMYDVGVFFISYTARADVAWRWHSGFSDDPKINYKGASSEHVKIEDTTSGFDASDVEISTAPVAYLDHGAIYPGPNCFTVLPILLHPLSVGTVSISSASPFDKPVVDPNYLSHLNDLKILIHANRLCMRIGHAKALESMLDLKAKPTDKKDYFWSGDVDPDTVTDEEIADFIRDNAETIYHPVGTARISIDDKDSVIDPDLKVHGVQGLRVVNASIFPSQISGHPTAALIARRLQ
>c769
MAPQLQPDIMLNAFQRAIHPLNNWYSVLVFGILGTISSVIMTYHGLDSMRDRFQAEFYDTEDTFDFIVVGAGSAGAVVANRLSENYKVLVLESGGEPNPLTNIPALALLVLNYPHIDWRFFTQPQPEACLGMNNGGCFWPRGKALGGSSNLNFLIYMRGHPEDFKQWARITGDPRWGYESVLEFFKKSEDYVGQWDDPKYHGHGGLLSVTKAPYQGLAEYWIKAAKEHGYNATDLNARYTEGFSPIYYTQKHGRRYGTYRAFLEPARSRKNLFIYKYSDVQKVLFRGKSPDLEAYGVEYVRHGVRKRAFAKKEVIVSAGTVMSPHLLMHSGIGPRKQLEENQIKVLVDSPGVGENLQDHISGFVGPFILDSPRTMLFDRDINAQSVMEFVQSGTGALSSTGTQASAFLVSSYAKATKNESHWPDIQWILLGTGIYARMDDDFAHSFNFPKETMRKWMGDHKGKDAFFVINMLSRPKSRGKIVLGGPDPSAYPLIHAGYLKHPDDVKVLIEGAKRTTDLVMNSKTFKDMDIKLPPTHFPGCEQHAFGSDIYWECFHRHCSLTVYHHVGTCAMGKKDDKNAVVDSELKVFGTKNLRVIDASVMPIISNGNTNAPTIMIGEMGSNFIKEAWATTKSNEIIR
>c770
MAPRQRQSRTRTSTTALACAAFLALVAAPAANGLTLDLVANATAVSSTLNSTQFDYVVVGGGNAGLAVAARLSSSYNVLVLEAGTDQSGNAGVTVPGLAGSPLGSGIDWGFSTVPQDDADGRSVYWPRGKMLGGSSGLNFLVSTRPNQAEVDQWSSLSGSSSWSWSSLYPYFKKTERFYSPSATKPQGVRPTYNGWVHGYSGPLAISYPPYLGKQNNGFYQAVQQMGVPVAQDLHTGSNHGVNLSPSTEHNSGTDRTRAYSVDYLKIATSRLTVITSAQATKINWTGSKDGSGKVVAQGVSFVPVGGGTATSVNVNKEVILSAGTVQTPQLLELSGVGDSSVLSRAGVPSVVNLPTVGTNLQDHACIVDVFKLKPGVDSLDELSSNQTALGAALADFANGQGILTQALYPLAYLQKQDFLSSDDINTQLRNLGSRANNPQLSDAQYQAVTALYHANVPIMELLAINTYFGNSSAQPDTNYISLAACLQNPLSRGDIHISTSDPLAKPTINPRYLQSPLDGFLLARAGQFLRNTAAKGPLAQYVDSEAEPGTVVQSDAEWMEWVKSVVRTEYHPIGTASNQPRASGGVVAPNLKVYGTSNVRVVDLSVAPLHVSSHTQTVAYAIAEMAASWILAGK
>c771
MAPSKSSSRVKPFRPCTLIGLLVVLIVVLQETVVTQGGIPGADSPPTSPKAAIQDDDVGAAILPGSSGLDGGFGLGEALLVASVRVTRKFLSMLNPLNWIMYLLGTDDDHWALGSFCNPKAHLYQECSVLFDHIVVGCGAAGCPLARTVSEGGKRVLLIERGKERSFEATPNAMTLEGAGRVIQDEDISQAIVTTQGVRTHTANIMGGGTSINMAIVIEEDKEYFEHMNRAYGYNWDLDRVNEAYSWISRKSYFPMPQDRPFATAWTKSLLARGYRPLIPVGRRYTGGPLPTAYRLHMGYIWGGGSFFNPDEGGFRMASDTLLGDDKGKKRNKNLTVLTEHTVQRVRFAVGDTVPRAVCVDYRKTAFEDQQILGTMNTISTDYIGWKAQAYYLMRRAKAALMYYAKNDPEESKILRRACVGVNGEITLSAGAIHTPLILMRSGIGSREQLKDISVSPVKELPAVGKNLRDRMFIPLNFFAVGKNTSARHHPARVCETTGVAKLGPDCENFNIGDRSLKCTLAVAEELYGGNTTEGVILGTRYIFPPAFRHHPLADKAFEIMTYCARHRPLIEHMHDYLPICATIEPMINCFRRGSAPFYFTSEPKSSGYVKLDKRGEVEVEVNYLKDVQDVFDAIRGMQNLIETTKDPAWKGVLEPISLNSCPVQILNGVLDLVARLGQDAIGEVFHGPSLREIRQDLELLLPGNRTVTPEELRGDGAETDDAEVTPDNLDRYVEILDKIQKKQDAVESLLRATQPSSPTGRFAVEAETTRLGWQKALSELRREFLVSGTTEAKDGVCNATCDGSEAALQLGVLQSCTFKDPYHFYSGFCGTNPEEASTEPSEEQNHDDAPSPSPMDDPEAFGRFWSNKFRPGSNRDQWVAAYPPILPRTDHPEEVAKFVFAFMTSLWHLHGTSKMGEVIDQNFNVIGVKSLSIADASALDKVPRMNPTATLVMMGRYIGLQKLEEWRRLTSASTSAKEFLSEVK
>c772
MAPSLRLWAALGALSVFSSSATAVDNETLAFAQVKEKTYDYIIVGGGLTGLVVANRLTEDEKGRPSTRSSI
>c773
MAPSLRSLVSFATILPFVIAVPAGTSDTASSKEGRTFDYVIVSVLVLETGTITEDINTIIPTLGNNINHALQYSIDSAPDPGLGGLMINGMAFDRASAADYNAWERLGNPGWGWDGLLPYFKKSTTFTPPKLTGKDFNITYNASFYGIDGPIQASFPNFEFPDVKVITRSDARRTYYDSVRNRTNLELLTGVEANRVLFENLTAKGVQFTNLASKTVSKVYARREVILAAGSVFTPKILQLSGIGPAEVLEAAGVKVKKDLAAVGANLQDHPNANMFWSTQNLSIPNPGFASDPAQNASAWTQYYTDRTGPSITSNYIQIVSSIRAQKSTEYLPAIYRKNPHLLRGYEAAKSITTELLAGTKAAAVEIPMNAFGLAIAAVQRPLSRGYVALNATNPSGTPIVQFNTFQNPADRIMMTEAVRWTRRHWQSPILARFSPAEVIPGVTAQSDDEIIDALLEQRALTATFAHQSGTCAMMPEEFGGCVSSNLTVYGTKKLSIVDASMIPLIPATHLQATMYAVAEKAADLIKMRNNR
>c774
MAPTAANGAESAYDYVIVGGGTAGCVLAARLTEDPDCRVCVIEGGPSDVGDERILRLRNWINLLGSEFDYGYTTVEQPRGNSHILHSRARVLGGCSSHNTLISFLPLPQDLDDWVGRGCSGWDPATILPYRDRLRTRIVPVAEADRNPIAKDFVTRLPAPSASPSSTTSTPSPSPTAPDSSRWPTSRRATCAPPRPSPISTPSWTGPTSPFSWKPGPTGCSPTSRGG
>c775
MAPTADVLVVGAGSAGCVLAHRLAAEGRRVRLVEAGGRGVPRRADRLPLTPPWARSYPAELGTGGQVRIWRGATLGGSGAVNGCYLLPPTDAAGWPWPDPVLAAAVDRVWARFDPEVAPDPDIRAWLASCGVPPTPVPLSMHAGQRISAADAYPLTRVALHTDTSVTHLLRQADRVTGVALADGSEWRAGEVALAAGTIGTLSLLARSGLITEAVGLVEHPELLFDSPAPAGAPDPAAVPGPLLATVAHREVPHPGLGTACLEVRPYARPFGAVIPGAGGPPTPQLGLALMGTTSRGRLHLDPAGAAVIDLGLLTDPGDRRALAAATEWARDVLGVRGPGVPATSQHLSGGAELGVRCDPSGRWSGVRGLRIVDGAALPGQRRRGPHAAILALADELARRWDQ
>c776
MAPTDGSSGDRPRARLALSESEAALLGAVFDRMFPDDGDGRSASRMGAVDYVDGALAGVEAENLTAYRRLFDWLSISAMARWKRPATQLADSQLDQLIAELERGAVADGFSLLRRDLLRGLFADPAYGGNRDMSGWKFLRHPGLGKDDTHPQGLSDWTASDSAPLPEAFDPEAGRRPPGQNVDVVIIGGGAVGSVVAARLAHRGLKVVVLEAGPWRSRASYRPDELGQAFYGRAALGPKFNAESPRWVRNTADAEDRPLTFSLGRMANGVGGSSVLYGARFRRFHPHHFQQHSAIVSRGLAGELPAASSLVDWPITYDDLEPYYTELEWMIGVAGEPSPFTPRSRPLPYKPLRPFPVGEAFSSAAGQLGYQPYAIPVGRVGAARDGITPTYDPWDEGIGADTSERWTPLDTLLPAALATGNLDLRTMCRALRIVTDSSGRARGVIYRDPDGRERQQDARATIVAAYTFETVRLLALSGNDTRPDGLGNQHGQLGLSYMSKMFPQVVGQFNDKVFNRHTGPGGQAVIIEDLMADGAIAVPGIVGGGTLSTENQLLPLQIASDLAPLDAPRWGAGYKQHLRGWNSRAAIKIQADALPLSTNRLMLDPRWRDRSGVGDPVMRVVWDLCEPDRRLYEHMQKRAEQLLREMGAHRIGRGPIETGVGCCHDLGGARAGQDPALSVVDPNWQVHDTPGLYVYSGATFSTCPGINPTLTIWAWALRNADDLARSLGA
>c777
MAPVEQVMDKKFDYVIIGGGTSGNALAARLTKNPEISILALEAGQAWDNDPNVGTTIPQLGNPEYDWIFKTKNLGGKEVIWSRDKGLGGSSNMNFMMWSRPGKDEIDDRFGNKGWNHENFIPYIRKAENFHAPPEGIIKRDKLQVDPSWYGKAGPIDVSYLESSSNAEPIIREIRLVYERGRTGC
>c778
MAPVIAAWIGCQLWPSFAALSPTRANRQSPSRLTRCTHTTRNAPRQASTAGCVQHPANADTVLNTKFACYICNLVAHWSVAVTKTEHPDVIIVGSGPTGSAYARTLRTLIPDLTILMLEAGPALGGRLGQHVEAIPPGAQRQAAAIASQGPATAPYDPASRAEWSRRIAGGDDASLLRRPGLFVANHADLHSGDAAFAGFAAANVGGMGAHWSGGCPRPARSEYPDLFNDAEMDALLTEAEAMLSVTPDLFAGDPGLDAMIAILRPAFAEGRPADRRVRTMPMAAGRVDGELCTHGVDVILGDLLENDPAFTLRPNATVLRILHENGSATGVEVHDRLADSIARIPCRAVVVAADSLHGPQLLHASGIRPPALGRNLNEHFQVSLLAELDTAATPKGMMWIPCLGDAFPFSVTIGGANPGHMPFDRPQDHALAFISVFCAGDITPDNRLRFDDEARDWRGLPRLSVDLRLTGNDQSTLAAARALTLSIADAVGRPLPGHMPISPPLGSSLHYQGTLRMGLRPDDSVSDRNSRVWGFSNLHVAGNGVLPTATATNPTLMSVSLAIAGARALATRLSEGGLDA
>c779
MAPVKILSKFALLFSLFAPSLVLAGGNNGSVPNETYDYIVVGTGPGGGPIAVNLAKAGYSVAVVEAGGDNSDNIFSIVPGFSGFVSEQPDMRWDFFVDHFDDENQQKKDWRLTYRKTDGTYYTGFNPPEGAVKLGIYYPRGSTFGGSAEINAITAAMPSDKDWSIVTDITGDQSWSPPQVYTHYEKTKTWLGLTVGDFTGFSQNAPNMKSIFEGGASVLGETFDAATQKDINDVYDPQRDFVPGAFPVTYHVDSMGRRSTSQTYITQTLAEKHANGTSKYKLTVKLNTLATKVLFEKKKGHQPRAKGIEVLVGANAYKADPQYDPSVTPPTARIFARKEVILSTGTFNTPQLLKLSGIGPAAELTAHNIPVLVNNPLVGTNLQDNYETAVVHTGSDGYPNPAFSVCTFTPDAALDPCFAEWETTGKGPYGVGPNMGFIVKSPESVTQNNERDIFVFGGNYAFKGFWPGFTSDMSTNATTWGFAMSKLNSRSAAGTVTLRSNDPTDPPVINFRFFENGADQDLNVLNYGVQFGRDALNAVSPSSPLKPWTEIEPCYEGGCTAAHDKSFIKDNAYSHHAVGTAAIGKVVDSKFRVIGVKGLRVVDASVWPRNPGAFPTLPTFVLSEKASVDVLAAAPHM
>c780
MAPVNKFWCLATITCSIAIYYGCRFTDHPTNRELRESYDYIIIGGGTAGSVLGSRLSEDDDVTVAILEAGGAADNDPRVTIPYYFPSLQGTELDWKFYTTRQQHAYFAMKDQVGYIPRGKLLGGSSNLNAMAYNRGGRDVYDKWAADGCDEWSYDDVLPYFLKSEDIQMTSLENSSYHSRGGPLPISEAKVTPLVDIYAEAWKEIGHQVIHDLNGPTQNGFSSMQANIKNGQRYSTSRAFLLPVMHRHNLDVHTYSHVYKVVINDGRAVAVVVDYQGERRTVRANKEVILSAGALQSPQLLMLSGVGPRKHLKDMGIPVIADLPVGENLRDHLMFVFRQLTNTSHSTTEEEAESLTEQLRYYVLGKGPLSYGGPEGSAFFHSDSSLEGKQPPDLQLSFYSKSASTSGKNMGEYNFRDEVYQALPDGKQSFSYGIILLKPKSKGTIRLRSKDPMDPPIIDPNYLADSGDIDTFVKGIRVCERLAVTSTMARIGASASDAQHPRFCREFTPGSDEYWGCMVRHLASTLYHQASTCRMGSVDDPTAVVDSQLRVKGVSGLRVVDASVIRDLHSGSPHAQVIMIAEKAADIIKNVNTVQNLRKRTTIG
>c781
MAPVSGAAHDYVVVGGGGAGCVVARRLAERGASVLLLEAGPDDVGREDVADAGAWPAMLGGELDWGVSYAPSPRTAGRRIPLPRGRVLGGSSSTNAMLWYRGHPSDYDGWGVPGWGWADVAPCLERAERVLRIERPRDPHPVATALVDAVEAAGRQGWDGFAELAELTAAAEDDGAGGVRSRRWSTSRAYLRELPPLEDVSGSGSLTVLTGSPALRLEMRDGRASGVVHLLDGQPVTAGVRSGGEVVLCAGAVETPRLLLASGIGDPADLARLGVPVVSALGGVGRNLQDHPLLEGVTLRMPEPRGRTRDNGGGAVWNWRSGKPRSDAPDLHCFVTQAACATPAVAEAHGLDRSDPHLVGLGVGLMGSRSRGHLVVRDVAPGGAVDIHPQLLADPADRAALLQGLRDVIDLADGPVFTALGAQRLTPRPAAHPGLDSCSDTDLEEFMSLACTTFFHACGTAAMGRDDDERAVLDAQLRVRGVDGLRVADASAFPTVPTANTLAAVVTLAERAADLLVPWAVRR
>c782
MAPVSSSPQQHVLTHDTPVGYYEALRWYLLGSFYFAYTLYLFVCDNLGDIVCMGYLFGALNATIASKLSMGPDLQMREIFLSTPRMILWSLSNLLLFNIHNQRHPSAMLEDHQNKPWRPLPAGRVSPQMTNRLMFIMYPVVLLISYHWGGMVPCLLEAFSCLWYNEWGGASDPFLKNLLNGVGLACFFAGPLEVVAGRCIFTGGGKAAIWLGILSACITTTVHTQDFRDVKGDLATGRRTVPLVIGDVPARILVAVGVVTGTGVVCWFWDATWLQISLPAVIGGTVPAGIAEKLFGTTLRSSSSGDWPLGPGGQALWHWSSPQQHQRQPAVGGGTSGLVVATRLSEYSKHNVLVIEAGADHTADPRVQIPALFDTLKDSDLDWKFKSEPQPALGGRTINLNQGKALGGSSAINAFVFVPPTKHLIDSWKELGNEGWDWDSLQPFFSKAFTSPPRVDASSSTSLGVDRPATSNQAATGPVQTSFSGNLTDLVRESWIDAFGAEHRLMPGDPFVNPTVGAFSCISSIHPERKERSYSASAYYMPVRDRENLHILTEAEVMRIVFDNTKAGLPAHALGVEYKHQGTTSIAFAKKEVILAAGAFQSPKILELSGVGDAKLLNQLGIEVVVDLPAVGENLQDHAVASICFETTDDVDTLDALVRQEPEAVAQAMQDYGTSRTGPMSTWELRRMHTYRWIHPRGVRP
>c783
MAPVVPAEPRLPPGVVVGANEPVPDDVYDVVVVGSGAAGSVLAARLARQGRTVAVVESGDYVPERYDAGAPARPRPHDELDNLLRYYKDAGLQVTDGDCRMSVLQGQCVGGGSVVNNAVCFRMPDQVRSVWAGEFGATWAVDGRLDAAYDRIAKELRIAPVTTAVPDGWINPSARFLASGARALGRADALRPCEVNIEACLGCGYCNLACAYLRKRTVLQAVLPAAAATGRLRIFTGRRAREIVIRSTAYRAEGVIAEPTRGGGERRAIRGRRVAVAAGAVGSSALLGRTTALNPLGLPIGERFSFNFVSPVHAEYETPVRAFDGLQMGHYFVEDLPRDGFVIETWFSPPATQSLSLPGWMDELHANIQRYAYYASASPLVGSTARSKVDTRHAPERIWVQLDGRDLDRLKHGLQRTCELFFSGSPAPRRVLIGARKGWSLTPGTYRSSIDAIASFDELQISTAHPQGGNGLDPAERGVVRPDFRVRDTRDLYVVDASVFPTSLGVNPQWTIMAMADLAAGHVGGD
>c784
MAPYADINMPRLRTLLVATILILLQQSGLAYPRTHHASKLFVGGRGVDGEYDYIVDGKTTVLVVEYGQRTPSVLQLSGIGPRELLESAGILTVVNLPGVGQDFQHHAMIQAGLRFAAYLARSLTPTEYHPAGTRAMLPRDLGGVVDQELRVYGVDRIRGVPSKWSFAVFRVVSLVLCFLHFHRYTA
>c785
MAPYYERARAFLDLPSEGGWNAAYGWTAEGLEAHYGSPCLNYYSEHFDQIELVIRPVRMGEQFHKPLKSSRNIDVVLNSNVVEIEVDDTGESARGVRVITLSGRRFSVDEKMVVIAAGGLENVRLLLSSTSVRPNGLGNQNDLVGRFFADHINLEPGHLIPNDPAVDLSLYQRRDMTETTESAVWHELSPAAQKLFELVPCSVRLMSRAAALNNSGGRSLKKIVKEIARGKAPADPGAHLMNIMAEVESISAYAAQRLWYGRSPVSKVAYEMSLAPAPNPDSRVSLSGETDKLGMQRLKLDWRLSEIDFRTIRWAASTFVDEAAANGFGRTMLELENETLSEKVRWTWHHMCTTRMSSAPGEGVVDSDYRIHSKKNLYVAGSSVFSTSG
>c786
MAQADGCTMCGHCLAGCPNPAGQPLERKAKRATNVSYVPAAMATGNCEIVPDAFATAVLFDAASGADGRAAVRGVRWRDERTGDLQEAEARVVVLAGGSVESPRLWL
>c787
MAQDPDPERDPEDDARPEHAVISTFDLFSIGVGPSSSHTVGPMRAGRIFITDLVELGLLDKVQSVKITLYGSLAATGKGRHHTPQAVLLGLEGSDPETIDTGTIPSRYDAILSNKQLILGGHHRISYDHDRDMLWRWDHVLPTHPNGMRFACFGSDGELLAVNEYFSVGGGFVVNEKTKVDENLFYKGVDKALVQSSRLHQHSLSEPAHSDESDSGPETGRDESLPPYAFKTGADLLALTRTHNMTISQIVYDNERSFGYSDDDIQDKLRRIWSVMDDCIRSGVHAPDSALPGRLGLRRRAPMLYRRLMRGFYPGLSMPRGAPAIAAGESPAGSVEAPDQARVEARREWEVKDRERMGPPSGRRARATRVVGQFDHPILPEPPRKTMIPAVDFLSCYAIAVNEVNASGGRIVTSPTNGAAGVIPAVLKYIIEFVSDDPEKSVTTFLLTAAAVGMLFKRGSTISAAEGGCQAEVGVACSMASAGFAACMGASPETVLQAAEIGIEHNLGLTCDPIDGLVQVPCIERNSLGAVKAVTAAQLSMAADGVYSVTLDEAIAAMKLTAQDMSVKYKETSLSGLATTVKIPLTVPAC
>c788
MAQDRWDFAIIVASPARPTVLVIEAGGDNADIDGRVDGFKYVQQANPDKNWQDTTVPQKHLNGRTLSLARGRGLGGGSAINFSSWVIGPRDDYDHIAKLVQDDGWKWDKVKTRYKQLEKYHPTGIYKHRLKARCEDHGYEGDLQVGFPETVEAELYDLVDAAVDAGIPICADQNSGEPIGIAISASTARKGRRVMASDLLEPKPENLTIWTKTTVSQIIFDGSRANGVLLSDGREIFVRKEVILCAGPLADPKILMHSGIGPKETMQRFQIPVVQLNENVGQHLNDHQLAVFSWARSDTSSERLAWFRDSQRRAAARKQWEEEDGTGPLAHVGTSIALAYPKLDRIIESDEFAALDKETQALLKLETVPHWEFALGVPSLEYHFDPANASTMLSIFTFLLNEQSKGSVTIRSADPNDAVVVDCNFFSHPFDRRMAIEVTRDLLGLVRSPGFAKDTVGDIAVPRSESDEDVLDFWRSHSFSGSHMMGTCTMGIAEKSAVVDKDFRVFGVEKLRVCSTSVLPLLPNCHLQSTSYLVGLMLSDKLISHHSLGQA
>c789
MAQEQEYDVIVVGSGFGGAVSAMRLSQKGYKVAIVEEGMAWKNTEFPKSNWSVTKYLWAPIIRCFGIQRISLLRKLMIMHGVGVGGGSLVYANTLMRPEENIFRGPTWPKAVDWVKELWPHFEIGKKMLGVATNPYLAPNDLAMKTLGEKMSAAETFHATEVGIFFGKPEVEVPDPYFNGDGPTRTGCHFCGSCMIGCPNGAKNTLDKNYLYFAQKWGAKIFPGLRVEKITPQADGSYLISTVASRSYCGSAGTSFKGKKVVLAAGALGTVKLLLKNRDIYQTLPKLSKKIGEDVRSNGESLLGATTFDQSQDFSTGVAIGAAIHPDPYTKIEGVRYPAGSDLLRFMAVPLAGDGNCLVRPLKMLWRFLTRPLNYIRLLFTRDWAKSTIILLVMQSVESKIKLTLGRPVLNFFRLGLKGQRQEGEIPSYLPVAQDAALKLADIIKGEAQNIFSEVFFQTPATAHILGGALIGKNAEEGAVDSNHELFGYKGLYVSDASVVPSNLAVNPSLTITALTERFAAHFPINPALGPNFKPPVIKFTEIVGAQK
>c790
MAQEQQPQFDYVVVGSGGGGGPVAANLASAGFKVLLIEAGDEHENLSYQVPAFHGQATEDPEMRWDFFVQHYSAPERNTDGYDSKYVTEKKGVLYPRAGTLGGCTGHHALITLYPHNSDWEEISRIAKTYDPTDESWAPDRMRRIFERIERCGYLGEQGPKDVEARHGFSGWLTTEVLTDLIDPEALLDSPDLQLLQTVIGAVHATIWDVDFNPHDPKSLGRLLDRLESTLERAPNLKQLFKLQPLVDKKAELEAHVKGSLNQFLDPNDYRVTLEHREGVFLIPISVSPDERKRVGTRERIKQVKARFPENLTIWCNSFVTRIVFEGNKAVGVEYVNSQKYYDAAREDRSAPPRNEERKVERVKREVVVAGGSFNTPQLLMLSGIGPKEQVEKYKIKSVIDLPAVGGFLQDRYELGFISEAPKNYTILSDYLFREPKPGEKDAALDQWKATHNGLYATNGAVLCVIRKSSHRADENPDLFIFGLPAAFKGYFPGYADTLEQRRNRFTWAILKGHTRNKGGYVRLKSSDPFERPEINFKYFDEGTDEGGDDLAAMVEGVDFVRRFTSHLGLHALPLVAQKKKHPPDMNDGYQISEWVKQEAWGHHACGTCRIGPKDKPDEAALDADFKVRGAEGLRVVDASVFPSIPGFFIVTPIYMIAEKASESILKDAGWKPRDGGQNGLNLPEIG
>c791
MAQFDIIIVGSGFGGSVTAERLARAGRSVLILERGDWWYRANYEGRERRGEPMAYRQPDGSTRYIGGRKLFEHAVDPKYVYSLYEDIISDDVFIGVAAAVGGGSVIFSNVTERAPRRVFDTRPWPTYTDEAGQQKDWGYGYLSLLYDRVEGVGGRPPGIETHIPTVEPPRYQILKRVLEDIYGPGAFPPARVAVSRSVGDYEDGRLIPETEIGACRNCGFCNFGCVYAAQQNLMANYLARAEIAGARIWPNKSVTRLSFNPTAREWTVYY
>c792
MAQFDLDKHGAMDVIFAGGGTAACVAAGRLAKANPDLKILLIEGGPNNFQDPTVVHPAAYLTHLAPESKTALFYKAKPSKYLNGREAVVPTGGILGGGSSINFMMYTRAQGVDFDSWNTVGWNAREIMPLLNKLETFQQGESAINQRRHGHEGPIHVSSGGFRSKSEHVFMDSIKAMGFKEIVDLQDLDQVGGFSRWQRYVSLDGKRQDAAHCYIHPRLRDGKHPNLHILVHSKVVRVIFDEQAVPPRAIGVEYQTDPEHQPALSLSKPTLQFIRAAKLVVVSAGALGSPQILERSGIGNSQLLEGLKIKVISDLRGVGENYQDHHLVLSSYTSNLPPTETLDELFSSRKSFATAIQEKDPRMGWNGIDIASKLRMTDEEVKLLGADFEADWKRDFAPHPTRPVMLCGVINAFLGDAATVEPGQYFTVGTYTAYPYSRGSIHINSANDTQGGVVDENLNVHGTVGLKVADLSIAPENVGANTNNTALVIGEKAAVIIARELGIANI
>c793
MAQGAFDSPQFFLLSGIGPEDELRRHGIPVARALPGVGQNPQDHLDYTISHPSLRRDTVGVNPHGLLRLAKAGLHWRKAGEGFFASPMAEGGAPFCSPPPISYGLICTSIS
>c794
MAQGANSTVHDVVIIGSGAGGGTVTKVLADMGIKVLLMEAGPMIDMSDFKTMMGPSDVWHRGAGDAAELYTEGRAAALNYSASFSANMADEPYTVAPGSQFRLFRSRVIGGRTNHYARVQLRYSDYDFKPRSMNDVGWDWPISYADVAPYYDKAERLIGVTGRPEGLRSAPDGIFQTPAPFKVHEELLYRSCAKLGIKATSARQAVITHALNGRPGCIYCGQCGRGCRFGSNYASTYVQIFPAMRTGNVTVLANAMARELITDASGKVTAVSYVDKTTGTERQVRCRTVVLSAASCESARLLLNSKSSRHPDGLANSAGQVGKYLTDTVGFGLSATVPYLRGTPIHNTDGYGAHLYIPWWMADRHRELDFPLGYHVEVGGGGFGQPTLGFGAQALNQAEGYGLPMKQAIRESYGGINISLTGRGSMVPNEDSYCEIDPEVKDKWGIPALRFHWKWSDYERNQARHMRESFRAILETLGGTVNAPPAGRGGGAGARGQGAAGRAGGAGAAGAPQAAAGRGAINPPGVDPNDDRPQLGPGGGIIHEVGCVRMGDDPKTSVLNRFCQTHEVSNVFSADGGPFVSHGDKNPTHTIIALAWRTAEYLAEEMRKGNV
>c795
MAQGFGIYDYVIVGGGTAGCLLANRLSADPLVTVLLLEAGGKDNSPWVHVPVGYLYCVSNPTTDWCFRTANEAGLKARSIEYARGKVLGGCSTINGMVYIRGQARDYENWRASGNAGWGWEEVLPYFKRHEDFVQGESAEHGIGGEWRVEEQRAHWPIVNEFRDACIELGIPLTPCFNRGDNFGVGYFHVNQRRGVRVNASKAFLHSAKGRENLHVVTHAQAKSIQFQERRASGLTFDHRGQECQVHARREVVLCAGSICTPQLLELSGVGQLERLRALGIKPILDLPGVGENLQDHLQIPLVYKVKNASTLNELSDTLAGKAQIAAEYALKRSGPMSMHSSQLGVFTKSDPSQTSANIQFHVQPFSVDRFGDSLHSFPAITVSVCNLRPTSRGSVHATSPDFQSPPKIQPNYLSTQEDRKVLVDSIRIARKILGARALATHEPEEIQPGLQYQSDAELELAAAELATTKFHPVGTARMGRDHMAVVDERLRVHGLTGLRIVDASVMPSITSGNTNGPTLMIAEKAAEMIIQEHNADLVFARLKASRYVEPNPIVPTF
>c796
MAQGTGLGRVMPLSEQLREYGSGDGVSPAIYVSLQRCAGFGYVCYTVVYGVMWHFASHSDRNSSTTASGFSQSARRDAPLRRPPLKTRRPPAAQARLPHRPRHIRQCCRPITKRVGDAPRGMPTAGLSRDQRARNARGGMPAKRHAVSTSTAEDPSPLVLQEHGAPFDRHPLTSSTAQASSGIAIPEEACRPRRTLFRPAPPKDPSPPRSAGARRPIRRQWARIDQNSRGTRESCTTDREPSRPRPSSSATAAVQHRPTARLTLTMTQKHNGDLGEYQLRLAQVDVYIVMQRQSGVKVLLLEAGGANEDVLNIDVPQLCVTLTPSAPWDWNYTTPQVHLENRTLPFPRGIGLGGTSAVNCLVYTCGTKSDIDMWAALSGEEDWSWDVVLPYFKKAKPYRPRKQTHHSPPLPERCLPDAGDRPLLFNLPVGCVSPSSRGSVTINSSDPFAPPLINPNLLADELDLSGYIVRQGLKAGMRYLAAPAWDSYFVRPLQNLTTDEQFDAYIREHVVSFVKASEDTVHGYLTARER
>c797
[truncated: 3,104,872 more chars]
