# Supplementary material
Source: MDPI journal article supplement (https://www.mdpi.com/2073-4344/10/9/1072)
Supplement: s1 [file s1 › catalysts-923799-sm-r1/Supplementary Dataset 3.xlsx]

## Sheet: Supplementary Dataset 3
Supplementary Dataset 3.
Annotation of the sequences in the Supplementary Dataset 2.
Sequence name	Genbank ID	Sorigue et al., 2017	Moulin et al., 2020	Metagenomic ID	Uniprot	Taxonomy
c0				25377605
c2				8213673
c3				57094970
c8				116725553
c9				5477273
c11				44417207
c13				116420004
c14				116393709
c15				116393708
c19				67928406
c28	RZL98230.1					Bacteria
c33				86475228
c37				75819940
c38				51851363
c39				51495918
c46				55798257
c54				51902812
c57				53444378
c63	KAF3068656.1					Fungi
c66				Mmseqs2-260
c71				115918384
c74	OEU15591.1		Frc-GMC			Sar
c79				26986352
c85				97429747
c88				Mmseqs2-3
c92				5364493
c93				18361266
c94				63121799
c96				115692801
c97				112729464
c98				112729465
c99				Mmseqs2-49
c100				116705161
c101				109822014
c112				45065182
c115				116110556
c125				61040891
c126				112803968
c133				41185939
c134				34828957
c145				Mmseqs2-51
c146				32333240
c147				56991765
c148				Mmseqs2-17
c149				Mmseqs2-11
c163				110043841
c171				45105939
c175				23083377
c187				34860853
c189				4123401
c196				9288719
c197				105170748
c199				9480839
c201				6159518
c202				Mmseqs2-24
c203				9377863
c215				71800925
c223				112395599
c235				100911230
c237				24741924
c245				95546172
c247	AXL65962.1
c249				62684973
c260				113633613
c270				56983000
c271				101194047
c272				59821895
c273				54889508
c274				50827628
c275				51823360
c276				50854433
c277				32629575
c278				32276484
c279				41188281
c280				76473747
c281				78183543
c282				82281508
c283				40728245
c289				44191816
c296				110002869
c300				115651140
c304				115097845
c307				64712795
c314				44088452
c315				112829216
c316				51825974
c318				56329824
c323				25954189
c331				101139983
c350				86572939
c355				63419576
c358				9525881
c359				Mmseqs2-50
c363				66323054
c364				Mmseqs2-54
c512	PSC67760.1		Mic-GMC			Viridiplantae
c617	QDM14404.1
c880	A0A248QE08	Cva-FAP	Cv-FAP		A0A248QE08
c891	XP_005714951.1	Ccr	Chcr-GMC
c933	OSX75970.1		Pum-GMC
c960	PRW60107.1		Cso-GMC			Viridiplantae
c1237	KAA8494096.1
c1339	XP_023243826.1					Metazoa
c1432	SOY75974.1					Bacteria
c1520	RYF45868.1					Bacteria
c1798	KZT01827.1					Fungi
c1811	PXF43763.1		Grc-GMC
c1886			Pye-GMC
c1938			Picse1-GMC
c1994			Picoc-GMC
c2080	XP_009037277.1	Aan	Aa-GMC			Sar
c2082	XP_005706847.1
c2211	WP_113102706.1					Bacteria
c2342	PVI01917.1					Fungi
c2500	HAZ13521.1					Bacteria
c2746	VEU45243.1		Psm-GMC			Sar
c2863	TFV29725.1					Bacteria
c2905	WP_115713012.1
c2932	GBF88787.1		Ras-GMC			Viridiplantae
c3004	GAX83712.1		Chles-GMC			Viridiplantae
c3078	XP_002948047.1	Vca	Vc-GMC			Viridiplantae
c3149			Chrzo-GMC
c3219	KAF3869021.1					Fungi
c3244	VFT14324.1					Bacteria
c3249	XP_016643824.1					Fungi
c3331	XP_005642926.1	Csu	Cs-GMC			Viridiplantae
c3334	QDZ18370.1					Viridiplantae
c3362	XP_001703004.1	Cre-FAP	Cr-FAP			Viridiplantae
c3364	KXZ47408.1	Gpe	Gpe-GMC			Viridiplantae
c3369	KAF5834678.1					Viridiplantae
c3370			Dus-GMC
c3397	KOO25289.1	Csp	Chry-GMC
c3463	PNH05783.1					Viridiplantae
c3534			Gsu-GMC
c3547	WP_051313366.1					Bacteria
c3724	MYS07583.1					Bacteria
c3847	KDQ28851.1					Fungi
c4015			Ulmu1-GMC
c4129	WP_040661879.1					Bacteria
c4148			Lobi-GMC
c4159			Bbr-GMC
c4220	ODM93031.1					Metazoa
c4275			Picok-GMC
c4307	GFH06812.1					Viridiplantae
c4457	XP_005537774.1	Cme	Cme-GMC
c4458	HHG08842.1					Bacteria
c4600	XP_005757666.1	Ehu2
c4645	WP_106347998.1					Bacteria
c4807			Pic1-GMC
c4822			Pic2-GMC
c4901	KAF2346660.1					Metazoa
c5068			Nga-GMC
c5069	EWM27492.1	Nga				Sar
c5070	TFJ85498.1		Nsa-GMC			Sar
c5213	TNC86301.1					Bacteria
c5493
c5790	CBJ25560.1		Esi-GMC			Sar
c5797	XP_005785285.1	Ehu1	Ehu-GMC
c6051	XP_005842992.1					Viridiplantae
c6345				14447664
c6353				83998391
c6354				116464801
c6376				88108869
c6377				7514247
c6380				Mmseqs2-1
c6388				1284070
c6397			Chlle-GMC
c6400				51109475
c6411			Chlch-GMC
c6425				Mmseqs2-7
c6427				88937776
c6429				56402010
c6434				52837172
c6438				Mmseqs2-25
c6439				Mmseqs2-2610548836
c6440				Mmseqs2-37
c6441				50882223
c6443				99174184
c6447				84957631
c6448				84015839
c6455				65816494
c6461				116669807
c6463				64007966
c6466				50856796
c6469				4528847
c6471				86460246
c6472	5NCC_A					Viridiplantae
c6473				18692122
c6474				5461703
c6483				94737353
c6494				44283221
c6496				18715199
c6497				80060596
c6511				80074550
c6514				56375169
c6543	PIW01245.1					Bacteria
c6544				79747864
c6545				Mmseqs2-16
c6546				Mmseqs2-10
c6547				95083276
c6549				88606846
c6550				Mmseqs2-6
c6551				32145453
c6552				32145454
c6553				72108616
c6555				115633043
c6564				45636988
c6567				36794477
c6574				45081375
c6578				65802654
c6579				65816066
c6580				95129187
c6582				113906562
c6583				18170693
c6584				54946517
c6585				51695920
c6590				112381351
c6591				112919685
c6592				116782156
c6598				97583906
c6599				96994444
c6600				56345353
c6601				44292113
c6607				46497577
c6608				88594881
c6609				Mmseqs2-15
c6610				65942239
c6611				56788639
c6612				44409163
c6614				76460653
c6617				34828956
c6619			Picsa-GMC
c6621			Chve-GMC
c6622			Chl68-GMC
c6646				84009611
c6647				112862145
c6648				Mmseqs2-48
c6649				53422642
c6650				Mmseqs2-53
c6651	XP_002178042.1	Ptr	Ptr-GMC			Sar
c6657				Mmseqs2-0
c6666				82879934
c6669				48920226
c6670				54908677
c6671				Mmseqs2-4
c6672				Mmseqs2-5
c1				Mmseqs2-295
c4	ODM87489.1					Metazoa
c5	RME86597.1					Bacteria
c6	KAF2890695.1					Metazoa
c7				116116263
c12	NCF63586.1					Bacteria
c16	NBW03992.1					Bacteria
c17	GAY33060.1					Viridiplantae
c18				44236583
c20	XP_013431509.1					Fungi
c21				Mmseqs2-57
c22	TMM07733.1					Bacteria
c23			Hsa-(CHD)
c24	RUU57971.1					Bacteria
c25				53484400
c26	TLY72429.1					Bacteria
c27	HAC91482.1					Bacteria
c29	TGV64177.1					Bacteria
c30	RWP58629.1					Bacteria
c31				14938733
c32	HAT56637.1					Bacteria
c34	BAM20010.1					Metazoa
c35				25197763
c36	WP_163993074.1					Bacteria
c40				551270
c41				66904166
c42	PZR86107.1					Bacteria
c43	KAF2468008.1					Fungi
c44				24541767
c45				78621087
c47				44721601
c48	RWS00761.1					Metazoa
c49				Mmseqs2-102
c50				16696668
c51	NCZ71253.1					Bacteria
c52	HHC08627.1					Bacteria
c53	RYY80431.1					Bacteria
c55	BAM19652.1					Metazoa
c56				25197764
c58	CCF36920.1					Fungi
c59	KIY53436.1					Fungi
c60	HAK29057.1					Bacteria
c61	EEB93349.1					Fungi
c62	MAI74692.1					Bacteria
c64	NCF20063.1					Bacteria
c65	POM70488.1					Sar
c67	HAI28707.1					Bacteria
c68	NJD17784.1					Bacteria
c69	KPV50491.1					Bacteria
c70	RYC53581.1					Fungi
c72	NES92837.1					Bacteria
c73				Mmseqs2-99
c75				48238470
c76				66905432
c77				14051773
c78				48229639
c80				48233379
c81				48238214
c82				103945736
c83				Mmseqs2-197
c84	RBH43697.1					Bacteria
c86				Mmseqs2-107
c87	HCI88008.1					Bacteria
c89	CCC93276.1
c90	TMF08344.1					Bacteria
c91	PSN46500.1					Metazoa
c95				Mmseqs2-101
c102	AAX26987.2					Metazoa
c103				Mmseqs2-111
c104				13288808
c105				1070153
c106				Mmseqs2-71
c107				Mmseqs2-61
c108				Mmseqs2-67
c109				Mmseqs2-64
c110				Mmseqs2-72
c111				Mmseqs2-76
c113	MQG20293.1					Bacteria
c114				Mmseqs2-216
c116				Mmseqs2-219
c117				Mmseqs2-220
c118				Mmseqs2-78
c119	HDD42554.1					Archaea
c120	HCP47909.1					Bacteria
c121	EEB92607.1					Fungi
c122	HEJ83489.1					Bacteria
c123	RZO53895.1					Bacteria
c124	ETO19338.1					Sar
c127	PKN45093.1					Bacteria
c128	HAJ43015.1					Bacteria
c129	PCI58436.1					Bacteria
c130	HCO03878.1					Bacteria
c131				51248696
c132				Mmseqs2-258
c135				Mmseqs2-79
c136				Mmseqs2-84
c137				Mmseqs2-85
c138				Mmseqs2-106
c139				Mmseqs2-83
c140				Mmseqs2-77
c144				Mmseqs2-73
c150				Mmseqs2-239
c151				Mmseqs2-201
c152				48230190
c155	HAM22830.1					Bacteria
c156	PYV08046.1					Bacteria
c157				Mmseqs2-175
c158				Mmseqs2-190
c159				Mmseqs2-240
c161				Mmseqs2-112
c162				Mmseqs2-139
c164				18466290
c165				Mmseqs2-148
c166				29758389
c167				Mmseqs2-151
c168				Mmseqs2-196
c169	HBK11205.1					Bacteria
c170	VWO98322.1					Fungi
c172	TIR44371.1					Bacteria
c173				Mmseqs2-217
c174	XP_011132772.1					Sar
c176	PSN35009.1					Metazoa
c177	VEN34428.1					Metazoa
c178	HBS36371.1					Bacteria
c179				18678933
c180	HCU88533.1					Bacteria
c181				13878082
c182	KAB7497353.1					Metazoa
c183	TSA43998.1					Bacteria
c184				Mmseqs2-279
c185	CRK92490.1					Metazoa
c186	NDG92659.1					Bacteria
c188	GFC75501.1					Viridiplantae
c190				55325276
c191				Mmseqs2-259
c192	RLB49220.1					Bacteria
c193	KAE8235268.1					Fungi
c194				48229673
c195	HAT56916.1					Bacteria
c198	KXK15642.1					Bacteria
c200				78838065
c204	XP_031634957.1					Metazoa
c205	OXU23050.1					Metazoa
c206	CZR52186.1					Fungi
c207	HCP45664.1					Bacteria
c208				Mmseqs2-82
c209				Mmseqs2-92
c210				Mmseqs2-149
c211	ODM89672.1					Metazoa
c212	KIJ42329.1					Fungi
c213	HGG59042.1					Bacteria
c214	OWY58889.1					Bacteria
c216				Mmseqs2-278
c217				Mmseqs2-173
c218				Mmseqs2-140
c219				Mmseqs2-170
c220	TIM59923.1					Bacteria
c221	TDJ12514.1					Bacteria
c222	TMI98129.1					Bacteria
c224	HBQ31873.1					Bacteria
c225	TQR44176.1					Bacteria
c226				90041170
c227	RMS24336.1					Bacteria
c228				13256365
c229	HBP59395.1					Bacteria
c230	NBX40811.1					Bacteria
c231	WP_022898728.1					Bacteria
c232	WP_106255288.1					Bacteria
c233				Mmseqs2-234
c234	HAN36327.1					Bacteria
c236	XP_007765290.1					Fungi
c238	TFK32052.1					Fungi
c239				Mmseqs2-299
c240				Mmseqs2-198
c242	BAJ83509.1					Fungi
c243	MAJ13955.1					Bacteria
c244	RWS18753.1					Metazoa
c246	OAX32678.1					Fungi
c250	NBR41124.1					Bacteria
c251	BAC31266.1					Metazoa
c252	GBL80370.1					Metazoa
c253	XP_030746384.1					Metazoa
c254	TIV69636.1					Bacteria
c256				47608502
c257	HAF41409.1					Bacteria
c259	THW03201.1					Fungi
c261				20945595
c262	RME82496.1					Bacteria
c263	PHJ17255.1					Sar
c264	EMD36302.1					Fungi
c265	RMD86962.1					Bacteria
c266	HBP72092.1					Bacteria
c267	XP_004933918.1					Metazoa
c268				Mmseqs2-270
c269	TFU99201.1					Bacteria
c284				Mmseqs2-261
c285	XP_031369714.1					Metazoa
c286	WP_127384266.1					Bacteria
c287				Mmseqs2-168
c288	KXN67582.1					Fungi
c290	XP_017303840.1					Metazoa
c291	HAG46948.1					Bacteria
c292				113423694
c293				103949205
c294				17829749
c295				50102797
c297	MBU87743.1					Bacteria
c298	HAU93890.1					Bacteria
c299				66904049
c301	EEB98586.1					Fungi
c302				94896251
c303	XP_017774435.1					Metazoa
c305				Mmseqs2-96
c306				Mmseqs2-264
c308				Mmseqs2-105
c309				Mmseqs2-103
c310				Mmseqs2-104
c311				64337487
c312				Mmseqs2-269
c313	TGR72992.1					Bacteria
c317	RWS13572.1					Metazoa
c319				Mmseqs2-91
c320				Mmseqs2-97
c321	MYE02024.1					Bacteria
c322				18471755
c324				Mmseqs2-214
c325	XP_320416.4					Metazoa
c326				Mmseqs2-256
c327				Mmseqs2-243
c328	NCU21678.1					Bacteria
c329	XP_007397762.1					Fungi
c330	WP_173399498.1					Bacteria
c334	OVE82704.1					Bacteria
c335	NCG10943.1					Bacteria
c336	NBP71899.1					Bacteria
c337	RYY70206.1					Bacteria
c338	PKL57504.1					Archaea
c339	AUW87483.1					Metazoa
c340	NDA78316.1					Bacteria
c341	HBP72093.1					Bacteria
c342				Mmseqs2-242
c343	EEB99127.1					Fungi
c346	NCC88528.1					Bacteria
c347	XP_022207366.1					Metazoa
c348	PIR12832.1					Bacteria
c349	TDD13944.1					Bacteria
c351				Mmseqs2-215
c352	HAC35298.1					Bacteria
c353	RMG96895.1					Bacteria
c354	TAL03185.1					Bacteria
c356	HBJ32069.1					Bacteria
c357	HFC05152.1					Bacteria
c360	THU85336.1					Fungi
c361	HBM54088.1					Bacteria
c362	THY67671.1					Fungi
c365	WP_133719972.1					Bacteria
c366	WP_109505079.1					Bacteria
c367	WP_137860159.1					Bacteria
c368	KAA6414226.1					Fungi
c369	GAC71650.1					Fungi
c370	TVU30395.1					Viridiplantae
c371	NBU95790.1					Bacteria
c372	MBF68819.1					Bacteria
c373	GAT17132.1					Bacteria
c374	WP_035085671.1					Bacteria
c375	MYF70459.1					Bacteria
c376	WP_072596225.1					Bacteria
c377	TBR20785.1					Bacteria
c378	KFA71232.1					Fungi
c379	KKY22426.1					Fungi
c380	OGG05317.1					Bacteria
c381	WP_104954619.1					Bacteria
c382	EFN84161.1					Metazoa
c383	WP_048737873.1					Bacteria
c384	MSO44687.1					Bacteria
c385	OLT16473.1					Bacteria
c386	KOS18614.1					Fungi
c387	TMK54389.1					Bacteria
c388	EAZ37866.1					Viridiplantae
c389	GAW19858.1					Fungi
c390	GAQ33408.1					Bacteria
c391	XP_003046972.1					Fungi
c392	PNF19747.1					Metazoa
c393	VAH04254.1					Viridiplantae
c394		Osa
c395			Osa-(HNL)
c396	XP_031894621.1					Fungi
c397	PVD31882.1					Metazoa
c399	HBS27512.1					Bacteria
c400	SJL11852.1					Fungi
c401	XP_019760007.1					Metazoa
c402	BAT01866.1					Viridiplantae
c403	TPG16496.1					Bacteria
c404	KFH40641.1					Fungi
c405	CDX13037.1					Bacteria
c406	KAE8382975.1					Fungi
c407	TMB48648.1					Bacteria
c408	OLL26423.1					Fungi
c410	WP_152708584.1					Bacteria
c411	KAA0183554.1					Metazoa
c412	CCQ17350.1					Bacteria
c413	GEL21772.1					Bacteria
c414	WP_102251977.1
c415	WP_156680727.1					Bacteria
c416	WP_145206889.1					Bacteria
c417	TBR24042.1					Bacteria
c418	CZR52831.1					Fungi
c419	WP_052383575.1					Bacteria
c420	XP_004363644.1
c421	TFY53105.1					Fungi
c422	WP_151119636.1					Bacteria
c424	CAA7055523.1					Viridiplantae
c425	HCB76135.1					Bacteria
c426	CDO73776.1					Fungi
c427	CEL01764.1					Fungi
c428	MSO19527.1					Bacteria
c429	RWA07765.1					Fungi
c430	XP_033109793.1					Metazoa
c431	KAF2480852.1					Fungi
c432	RMH46892.1					Bacteria
c433	GAM35263.1					Fungi
c435	KKY24066.1					Fungi
c436	WP_155903232.1					Bacteria
c437	WP_076862214.1					Bacteria
c438	WP_132429654.1					Bacteria
c439	PKI41432.1					Viridiplantae
c440	XP_005716499.1
c441	XP_029161022.1					Metazoa
c442	THH01137.1					Fungi
c443		Dre
c444	EMO30575.1					Bacteria
c446	WP_108783587.1					Bacteria
c447	WP_157689568.1					Archaea
c448	HFL67052.1					Bacteria
c449	WP_157081105.1					Bacteria
c450	WP_109920211.1					Bacteria
c451	TVY18175.1					Fungi
c452	WP_068277894.1					Bacteria
c453	KAA8900866.1					Fungi
c454	XP_030020891.1					Metazoa
c455	BAB53014.1				Q5NT46	Bacteria
c456	CRG91428.1					Fungi
c458	HAH66107.1					Bacteria
c459	PFH50977.1					Fungi
c460	WP_068277827.1					Bacteria
c461	WP_082841977.1					Bacteria
c463	XP_018026203.1					Metazoa
c465	OGT94931.1					Bacteria
c466	HCC96564.1					Bacteria
c468	EXB94931.1					Viridiplantae
c469	KAB5516976.1					Fungi
c470	RXG58058.1					Metazoa
c471	PYV04136.1					Bacteria
c472	BAR57361.1					Bacteria
c473	HBP68700.1					Bacteria
c474	RDI83131.1					Fungi
c475	TMB79409.1					Bacteria
c476	KZY39453.1					Bacteria
c477	WP_079550114.1
c478	WP_147111369.1					Bacteria
c479	WP_099623173.1					Bacteria
c480	HCD49931.1					Bacteria
c481	XP_026683585.1					Metazoa
c482	WP_142444031.1					Archaea
c485	GAW16197.1					Fungi
c486					Q8GQE7
c487			Bce-GMC
c488	KZM20533.1					Fungi
c489	WP_014437558.1					Bacteria
c490	SBS72370.1					Bacteria
c491	WP_104830153.1					Bacteria
c492	BCB75589.1					Bacteria
c493	WP_082013366.1					Bacteria
c494	WP_086606510.1					Bacteria
c495	WP_070391782.1					Bacteria
c496	TMC09733.1					Bacteria
c497	CAB0008978.1					Metazoa
c498	WP_012826928.1					Bacteria
c499	MAR19652.1					Bacteria
c500	WP_088311003.1					Bacteria
c501	CAB1112527.1					Sar
c502	AHZ89316.1					Bacteria
c503	WP_146919953.1					Bacteria
c504	KNZ73298.1					Fungi
c505	WP_134683337.1					Bacteria
c506	WP_054297863.1					Archaea
c507	HGB06143.1					Bacteria
c508	WP_033166460.1					Bacteria
c509	TDI13394.1					Bacteria
c510	HGT55043.1					Bacteria
c511	GAT54989.1					Fungi
c513	WP_137858199.1					Bacteria
c514	CEL10234.1					Fungi
c515	OFV96342.1					Bacteria
c516	TGO25984.1					Fungi
c517	HAN35154.1					Bacteria
c518	KAB7503437.1					Metazoa
c519	WP_106087600.1					Bacteria
c520	WP_159716154.1					Bacteria
c522	XP_001542977.1					Fungi
c523	WP_009741564.1					Bacteria
c525	WP_162818513.1					Bacteria
c526	WP_034840132.1					Bacteria
c528	TDI18693.1					Bacteria
c529	XP_003721102.1					Fungi
c530			Rso-GMC
c531	TDI10439.1					Bacteria
c532	OGA56145.1					Bacteria
c533	PYT26914.1					Bacteria
c535	WP_013944129.1					Bacteria
c536	KNE91902.1					Fungi
c537	POS69595.1					Fungi
c539	XP_023945873.1					Metazoa
c540	CRL20273.1					Fungi
c541	WP_080615881.1					Bacteria
c543	EWM21472.1					Sar
c544	KAF3049585.1					Fungi
c545	HEV44176.1					Bacteria
c546	KAF2458635.1					Fungi
c547	GAW08847.1					Fungi
c548	EFJ25323.1					Viridiplantae
c549	KAE8232649.1					Fungi
c550	CRK20329.1					Fungi
c551	WP_116849265.1					Bacteria
c552	CEL73157.1					Sar
c553	XP_007301607.1					Fungi
c554	XP_031022089.1					Fungi
c556	XP_031024887.1					Fungi
c557	WP_142898529.1					Bacteria
c559	VVA27783.1					Viridiplantae
c560	TFK50440.1					Fungi
c561	MBH63095.1					Bacteria
c562	GDX56186.1					Bacteria
c563	CEH16428.1					Fungi
c564	KAF2136822.1					Fungi
c566	WP_115745409.1					Bacteria
c567	KJY02083.1					Fungi
c568	WP_068740862.1					Bacteria
c569	WP_137680909.1					Bacteria
c570	WP_144643695.1					Bacteria
c571	KIM83547.1					Fungi
c572	KAF2009286.1					Fungi
c573	GBF98468.1					Viridiplantae
c574	GBN76146.1					Metazoa
c575	XP_003742566.1					Metazoa
c576	WP_159171575.1					Bacteria
c577	RYP36322.1					Fungi
c578	XP_013947610.1					Fungi
c579	XP_033532721.1					Fungi
c580	WP_143161331.1
c581	SPL91863.1					Bacteria
c582	WP_162804051.1					Bacteria
c583	OQO00279.1					Fungi
c585	WP_156352074.1					Bacteria
c586	ESZ10363.1					Bacteria
c587	NCW48084.1					Bacteria
c588	WP_099916589.1					Bacteria
c589	WP_080507420.1					Bacteria
c590	XP_016594309.1					Fungi
c591	RPB21902.1					Fungi
c592	TNE87306.1					Bacteria
c593	WP_019863430.1					Bacteria
c594	CUA89878.1					Bacteria
c595	WP_147849092.1					Bacteria
c597	XP_016244461.1					Fungi
c598	KXV03635.1					Bacteria
c599	WP_146542703.1					Bacteria
c600	HCG28744.1					Bacteria
c601	TVR95118.1					Bacteria
c602	OLC94019.1					Archaea
c603	XP_019769837.1					Metazoa
c604	PXF47833.1
c605	PZQ52236.1					Bacteria
c606	OJU15319.1					Bacteria
c607	WP_093160346.1					Bacteria
c608	WP_002185240.1					Bacteria
c609	WP_096453478.1					Bacteria
c610	KAE8354687.1					Fungi
c611	HAW18255.1					Bacteria
c612			Ulmu10-GMC
c613	PQE26716.1					Fungi
c614	CZT37477.1					Bacteria
c615	WP_096031927.1					Bacteria
c616	KAF2165237.1					Fungi
c618	XP_015512042.1					Metazoa
c620	XP_003043379.1					Fungi
c623	KAF1952417.1					Fungi
c624	NIM98818.1					Bacteria
c625	WP_160619152.1					Bacteria
c627	GAP82378.1					Fungi
c628	GAT11592.1					Bacteria
c629	ANM86454.1					Fungi
c630	OTA36592.1					Fungi
c631	WP_088210235.1					Bacteria
c632	XP_031338786.1					Metazoa
c633	XP_015523497.1					Metazoa
c634	WP_162789528.1					Bacteria
c635	THC87997.1					Fungi
c636			Ame-(GlucDH)
c637	KRO47726.1					Bacteria
c638	NCS26207.1					Bacteria
c639	WP_093288081.1					Bacteria
c640	PIP82678.1					Bacteria
c641		Pan-AOX
c642	BAF63433.1					Fungi
c643			Ppas-AOX		F2QY27
c644		Cbo-AOX	Cbo-AOX
c645	XP_021950132.1					Metazoa
c646	XP_021883072.1					Fungi
c647	ODM98335.1					Metazoa
c649	HBA39199.1					Bacteria
c650	WP_158485150.1					Bacteria
c651	KAF1992843.1					Fungi
c652	GAM41186.1					Fungi
c653	RKK33465.1					Fungi
c654	WP_128235190.1					Bacteria
c655	WP_064241942.1					Bacteria
c657	TFJ80400.1					Sar
c658	KAE9371805.1					Fungi
c659	PYT74820.1					Bacteria
c660	WP_113358279.1					Bacteria
c661	WP_126673540.1					Bacteria
c662	KAF2749668.1					Fungi
c663	MBH47392.1					Bacteria
c664	XP_019042654.1					Fungi
c665	WP_126211260.1					Bacteria
c666	WP_166992686.1					Bacteria
c667	HEY50046.1					Bacteria
c668	WP_015905716.1					Bacteria
c669	XP_027193622.1					Metazoa
c670	WP_157811972.1					Bacteria
c672	MAV83332.1					Bacteria
c673	WP_076514419.1					Bacteria
c674	XP_007676724.1					Fungi
c675	BAQ21463.1					Bacteria
c676	WP_004273066.1					Bacteria
c678	ROW17644.1					Fungi
c680	WP_162319556.1					Bacteria
c681	WP_020927603.1					Bacteria
c682	WP_164210993.1					Bacteria
c683	MAW85469.1					Bacteria
c684	XP_001791201.1					Fungi
c685	KAF3043720.1					Fungi
c686	XP_002383257.1					Fungi
c687	WP_167313543.1					Bacteria
c688	CRG92675.1					Fungi
c689	OQV26099.1					Metazoa
c690	GBC46867.1					Fungi
c691	OYU69874.1					Bacteria
c692	XP_001598896.1					Fungi
c694	WP_107347920.1					Bacteria
c695	KIM79504.1					Fungi
c696	CCX31674.1					Fungi
c697		Ath-HFO	Ath2-GMC
c699	ROV90476.1					Fungi
c700	XP_026281552.1					Metazoa
c701	XP_017304758.1					Metazoa
c702	WP_082167575.1					Bacteria
c703	KNF02884.1					Fungi
c704	CAA9967182.1					Fungi
c705	XP_014556294.1					Fungi
c706	KIY69010.1					Fungi
c707	OSX69834.1
c708	SMR62725.1					Fungi
c709	XP_005776707.1
c710	MSQ83116.1					Bacteria
c711	GAD92606.1					Fungi
c712	TMD56147.1					Bacteria
c713		Zmay
c714	XP_026677969.1					Metazoa
c715	XP_008727723.1					Fungi
c717	CAA7257392.1					Fungi
c718	XP_007270268.1					Fungi
c719	OLP97184.1					Sar
c720	PRP84644.1
c721	WP_146428985.1					Bacteria
c722	MAR70694.1					Bacteria
c723	GAC52547.1					Bacteria
c725	BCA54089.1					Bacteria
c726	XP_021957200.1					Metazoa
c727	GAF45536.1					Bacteria
c728	CDZ30145.1					Bacteria
c729	KIN03408.1					Fungi
c730	TNE57676.1					Bacteria
c731	TFY80558.1					Fungi
c732	WP_068905222.1					Bacteria
c733	WP_094219825.1
c734	BCA54130.1					Bacteria
c735	PHH49129.1					Fungi
c736	CUS14907.1					Fungi
c737		Rsp-CKO
c738	XP_031023979.1					Fungi
c739	XP_024703926.1					Fungi
c740	XP_013957328.1					Fungi
c741	TVS11944.1					Bacteria
c742	EKG20843.1					Fungi
c743	WP_056898037.1					Bacteria
c744	XP_001538631.1					Fungi
c745	RYO64189.1					Fungi
c746	SMY23191.1					Fungi
c747	GAT60515.1					Fungi
c748	RWA10746.1					Fungi
c749	XP_031026606.1					Fungi
c750	KAE8749156.1					Metazoa
c751	PBK87733.1					Fungi
c752	MAX72384.1					Bacteria
c753	CCA77514.1					Fungi
c754	WP_049996878.1					Archaea
c755	WP_006077483.1		Hse-GMC			Archaea
c756	WP_005038645.1					Archaea
c757			Kni1-GMC
c758	EHL00988.1					Fungi
c759	CZR58715.1					Fungi
c760	KFX96157.1					Fungi
c761	TFJ83012.1					Sar
c762	OXA57467.1					Metazoa
c763	MAF50087.1					Bacteria
c764	XP_024541874.1					Viridiplantae
c765	XP_025370958.1					Fungi
c766	WP_158195446.1					Bacteria
c767	KAE8381808.1					Fungi
c768	KIM91603.1					Fungi
c769	XP_021948924.1					Metazoa
c770	GEM11269.1					Fungi
c771	XP_003881571.1					Sar
c772	KAF1960225.1					Fungi
c773	KAF1343514.1					Fungi
c774	GEC08797.1					Bacteria
c775	WP_145978702.1					Bacteria
c776	WP_146292164.1					Bacteria
c777	KIJ37144.1					Fungi
c778	WP_143145839.1
c779	RPA78086.1					Fungi
c780	XP_021362944.1					Metazoa
c781	WP_109773042.1					Bacteria
c782	RWA03444.1					Fungi
c783	OLB80395.1					Bacteria
c784	XP_003660961.1					Fungi
c785	WP_114287924.1					Bacteria
c786	HCO03879.1					Bacteria
c787	KZV76009.1					Fungi
c788	XP_018003496.1					Fungi
c789	HAZ12280.1					Bacteria
c790	WP_076343855.1					Bacteria
c792	OAL24824.1					Fungi
c793	KAF0175515.1					Bacteria
c794	ODS52847.1					Bacteria
c795	WP_088710565.1					Bacteria
c796	XP_007381270.1					Fungi
c797	CDO68225.1					Fungi
c798	WP_074654361.1					Bacteria
c799	XP_025433489.1					Fungi
c800	HBY61832.1					Bacteria
c801	NDG66475.1					Bacteria
c802	WP_053233662.1					Bacteria
c803	WP_111543916.1
c804	GFF46167.1					Fungi
c805	OGQ25675.1					Bacteria
c806	WP_121580126.1					Bacteria
c807	KAF3070182.1					Fungi
c808	TEY35213.1					Fungi
c809	HCS90516.1					Bacteria
c811	WP_021691532.1					Bacteria
c812	MBS38359.1					Bacteria
c813	MAB89129.1					Bacteria
c814	HEQ94145.1					Bacteria
c815	PIT00809.1					Bacteria
c816	MQA28873.1					Bacteria
c817	NHA00461.1					Bacteria
c818	OBZ76180.1					Fungi
c819	SHM91749.1					Bacteria
c820	OAA59655.1					Fungi
c821	HHJ20820.1					Bacteria
c822	SEH25244.1					Bacteria
c823	WP_063813401.1					Bacteria
c824	RXG58464.1					Metazoa
c825	OBT81573.1					Fungi
c826	WP_156218259.1
c827				48230850
c828	MAV87713.1					Bacteria
c829	HHR99074.1					Bacteria
c830	TAL03079.1					Bacteria
c831	KIJ23764.1					Fungi
c832	XP_004363977.1
c833	TMF91510.1					Bacteria
c834	NQW51367.1					Bacteria
c835	WP_156639661.1
c836	CAA7261241.1					Fungi
c837	XP_002910135.1					Fungi
c838	EEB87592.1					Fungi
c839	TAK18133.1					Bacteria
c840	TGW06436.1					Bacteria
c841	WP_007014352.1					Bacteria
c842	GBM80331.1					Metazoa
c843	XP_014173667.1					Fungi
c844	TMB23810.1					Bacteria
c845	WP_109366328.1
c847			Scu-GMC
c848	WP_104663483.1					Bacteria
c850	WP_145683583.1					Bacteria
c851	CDQ15784.1					Bacteria
c852	WP_173403734.1					Bacteria
c853	WP_165281150.1					Bacteria
c854	WP_012286964.1					Bacteria
c855	XP_017772412.1					Metazoa
c856	KIK42249.1					Fungi
c857	XP_007749167.1					Fungi
c858	EJK66383.1					Sar
c860	XP_011183091.1					Metazoa
c861	XP_002542728.1					Fungi
c862	WP_119267179.1					Bacteria
c863	WP_013127179.1					Bacteria
c864	KIJ47614.1					Fungi
c865	CUS09764.1					Fungi
c866	WP_163992195.1					Bacteria
c867	ORZ06221.1					Fungi
c868	RUS29094.1					Fungi
c869	WP_049986920.1					Archaea
c870	HAE09913.1					Bacteria
c871	XP_013090967.1					Metazoa
c872	XP_006461320.1					Fungi
c873	PRP73198.1
c874	WP_073974158.1					Bacteria
c875	RYC54896.1					Fungi
c876	WP_127281926.1					Bacteria
c877	PWA80521.1					Viridiplantae
c878	TLD29202.1					Fungi
c881	WP_149799868.1					Archaea
c882	XP_007401636.1					Fungi
c883	WP_132458466.1					Bacteria
c884	KIY66684.1					Fungi
c886	KDO63590.1					Viridiplantae
c888	WP_127298006.1					Bacteria
c889	XP_021947812.1					Metazoa
c890	SAL99573.1					Fungi
c892	CVL04243.1					Fungi
c893	XP_014675292.1					Metazoa
c894	XP_023027451.1					Metazoa
c895	RHZ58364.1					Fungi
c896	XP_007397694.1					Fungi
c897				44830347
c898	WP_145206908.1					Bacteria
c899	GAQ81623.1					Viridiplantae
c900	WP_176945916.1					Bacteria
c901	XP_007397353.1					Fungi
c902	XP_002844916.1					Fungi
c903	PHR62676.1					Bacteria
c904	XP_001797048.1					Fungi
c905	XP_001836512.2					Fungi
c906	EQB58814.1					Fungi
c907	XP_011390799.1					Fungi
c908	TQD80564.1					Viridiplantae
c909	XP_025505510.1					Fungi
c910	GAA87012.1					Fungi
c911	RFU30761.1					Fungi
c912	XP_005108386.1					Metazoa
c913	RYP56951.1					Fungi
c914	XP_013329124.1					Fungi
c915	WP_092864050.1					Bacteria
c916	KAB5566260.1					Fungi
c918	GAM41580.1					Fungi
c919	XP_014208795.2					Metazoa
c920	KID81377.1					Fungi
c921	VDC07351.1					Fungi
c922	MYB22799.1					Bacteria
c923	XP_007764427.1					Fungi
c924	XP_023628549.1					Fungi
c925	WP_106091526.1					Bacteria
c926	WP_093018741.1					Bacteria
c927	CRK32016.1					Fungi
c928	WP_108985442.1					Bacteria
c929	WP_085339288.1					Bacteria
c930	AMS28632.1					Bacteria
c931	OYU51291.1					Bacteria
c932	OYU77958.1					Bacteria
c934	OJW27854.1					Bacteria
c935	KAA8913781.1					Fungi
c936	WP_090710661.1					Bacteria
c937	WP_111195750.1					Bacteria
c938		Aor-FOX			Q2UD26
c939	WP_162910248.1					Bacteria
c940	KKY14824.1					Fungi
c941	XP_003738960.1					Metazoa
c943	WP_068013862.1					Bacteria
c944	WP_051035215.1					Bacteria
c945	GAW02283.1					Fungi
c946	EWC47090.1					Fungi
c947	WP_115518374.1					Bacteria
c948	CAB4738587.1
c949	WP_112310551.1					Bacteria
c950	PIV32393.1					Bacteria
c951			Ulmu7-GMC
c953	XP_007382608.1					Fungi
c954			Pp2-GMC
c955	RYP35132.1					Fungi
c956	KFA46943.1					Fungi
c957	TML18080.1					Bacteria
c958	WP_066144613.1					Archaea
c959	WP_103683531.1					Bacteria
c961	BAK33438.1					Bacteria
c962	XP_031636920.1					Metazoa
c963	XP_007837981.1					Fungi
c964	OGA57231.1					Bacteria
c965	WP_178289638.1					Archaea
c966	WP_178918241.1					Archaea
c967	WP_156707841.1					Archaea
c968	PPC87747.1					Bacteria
c969	WP_102331350.1					Bacteria
c970	KAA8912988.1					Fungi
c971	XP_016628032.1					Fungi
c972	XP_002377522.1					Fungi
c973	RYP01492.1					Fungi
c974			Rso-(ADH)
c975	XP_007392501.1					Fungi
c976	WP_165703698.1					Bacteria
c977	CCX04743.1					Fungi
c978	WP_095677773.1					Bacteria
c979	OQV08166.1					Fungi
c980	PHX71196.1					Bacteria
c981	WP_021274791.1					Bacteria
c982	HBD12215.1					Bacteria
c983	KAF2501630.1					Fungi
c984	XP_025357352.1					Fungi
c985	WP_089420122.1					Bacteria
c986	HFM61277.1					Bacteria
c987	CEL98273.1					Sar
c988			Dps-(GlucDH)
c989	OQO29666.1					Fungi
c990	OJT97695.1					Bacteria
c991	KOS20764.1					Fungi
c992	GAA92455.1					Fungi
c993	KIJ90285.1					Fungi
c994	XP_020056195.1					Fungi
c995	WP_021474676.1					Bacteria
c996	GAA89388.1					Fungi
c998	XP_007333550.1					Fungi
c999	CCF42370.1					Fungi
c1000	WP_080058430.1					Bacteria
c1001	KFZ23456.1					Fungi
c1002	WP_017875859.1					Bacteria
c1003	XP_001276380.1					Fungi
c1004	WP_052230673.1					Bacteria
c1005	XP_003027360.1					Fungi
c1006	CBJ33402.1					Sar
c1008	ODN05982.1					Metazoa
c1009	XP_007917530.1					Fungi
c1010	OXE35241.1					Bacteria
c1011	OWP03139.1					Fungi
c1012	MSQ71505.1					Bacteria
c1015	TVR21997.1					Bacteria
c1016	OQE74203.1					Fungi
c1017	KAE9406055.1					Fungi
c1018	PZN29363.1					Bacteria
c1019	SMY23609.1					Fungi
c1020	WP_054686334.1					Bacteria
c1021	WP_014321611.1					Bacteria
c1023	WP_018416516.1					Bacteria
c1024	KJK78189.1					Fungi
c1025	SPF48607.1					Bacteria
c1026	PCG66087.1					Metazoa
c1027	TFK97029.1					Fungi
c1028	TPG05124.1					Bacteria
c1029	PYQ86068.1					Bacteria
c1030	WP_134332634.1					Bacteria
c1031	TDI17210.1					Bacteria
c1032	WP_146386614.1					Bacteria
c1033	MQG72546.1					Bacteria
c1034	WP_160984479.1					Bacteria
c1035	WP_018083733.1
c1036	KKY15265.1					Fungi
c1037	KAB8070959.1					Fungi
c1038	PCI65958.1					Bacteria
c1039	WP_091162400.1					Bacteria
c1040	NBT56155.1					Bacteria
c1041	XP_007809819.1					Fungi
c1042	WP_081606560.1					Bacteria
c1043	CAB4905040.1
c1044	WP_170861189.1					Bacteria
c1045	MAO75073.1					Bacteria
c1046	WP_027545721.1					Bacteria
c1047	KAE9363003.1					Fungi
c1048	KAF2152384.1					Fungi
c1049	XP_014671607.1					Metazoa
c1050	OXA49452.1					Metazoa
c1051	RYC58351.1					Fungi
c1052	WP_060689217.1
c1053	KZM19102.1					Fungi
c1054	WP_083933706.1					Bacteria
c1055	BBH15516.1					Bacteria
c1056	THV45426.1					Fungi
c1057	PYE62763.1					Bacteria
c1058	XP_013314697.1					Fungi
c1059	KXN86996.1					Fungi
c1060	GBP87847.1					Metazoa
c1061	WP_150430248.1					Bacteria
c1062	WP_084504810.1
c1063	XP_025377572.1					Fungi
c1064		Zmar1	Zm1-GMC
c1065	NBR27350.1					Bacteria
c1067	HET69252.1					Bacteria
c1068	KIJ25763.1					Fungi
c1069	XP_022906212.1					Metazoa
c1070	VFS03941.1					Bacteria
c1071	OQE36887.1					Fungi
c1072	ORY21517.1					Fungi
c1073	CAB0043381.1					Metazoa
c1074	MPC73589.1					Metazoa
c1076	MPC39652.1					Metazoa
c1077	WP_172842128.1					Bacteria
c1078	XP_013317289.1					Fungi
c1079	XP_007861677.1					Fungi
c1080	XP_001793088.1					Fungi
c1081	KDQ20914.1					Fungi
c1082	WP_116408382.1					Bacteria
c1083	WP_115684007.1					Bacteria
c1084			Pp1-GMC
c1085	XP_003857809.1					Fungi
c1086	SQH33087.1					Bacteria
c1087	VVD01281.1					Metazoa
c1088	TKR95865.1					Metazoa
c1089	TBU39962.1					Fungi
c1090	VVC31731.1					Metazoa
c1091	XP_017489461.1					Metazoa
c1092	PNH05790.1					Viridiplantae
c1093	WP_104318107.1					Bacteria
c1094	KAF3042478.1					Fungi
c1096	WP_075092954.1					Bacteria
c1097	XP_027209162.1					Metazoa
c1099	WP_100812317.1					Bacteria
c1100	WP_169922349.1					Bacteria
c1101	NBF41198.1					Bacteria
c1102	WP_075214091.1					Bacteria
c1103	OBZ65422.1					Fungi
c1104	WP_094187137.1					Bacteria
c1105	RIK09919.1					Bacteria
c1106	XP_021193337.1					Metazoa
c1107	GBO44009.1					Metazoa
c1108	KPI96024.1					Metazoa
c1110	KIJ51194.1					Fungi
c1111	HFL76119.1					Bacteria
c1112	PSQ84537.1					Bacteria
c1114	KTB43904.1					Fungi
c1115	WP_110450460.1					Bacteria
c1116	XP_016758339.1					Fungi
c1117	WP_085107883.1					Bacteria
c1118	TPV93711.1					Bacteria
c1119	XP_024526973.1					Viridiplantae
c1120	WP_072825645.1					Bacteria
c1121	WP_137226690.1					Bacteria
c1122	WP_028720139.1					Bacteria
c1123	TMD56148.1					Bacteria
c1124	XP_007381012.1					Fungi
c1126	WP_148307948.1					Bacteria
c1127	OJA07946.1					Fungi
c1128	WP_067734247.1					Bacteria
c1130	CEP01371.1					Sar
c1131	XP_014530536.1					Fungi
c1132	WP_065706043.1					Bacteria
c1133	SKQ86952.1					Bacteria
c1135	OCK84792.1					Fungi
c1136	NBN89564.1					Bacteria
c1137	RJP14888.1					Bacteria
c1138	WP_014724532.1					Bacteria
c1139	WP_016745045.1					Bacteria
c1140	WP_014244528.1					Bacteria
c1141	WP_112848890.1					Bacteria
c1142	HAO66936.1					Bacteria
c1143	HAB37688.1					Bacteria
c1144	SIO70561.1					Bacteria
c1145	WP_055479553.1					Bacteria
c1146	WP_050485578.1					Bacteria
c1147	WP_084363550.1					Bacteria
c1148	XP_015773894.1					Metazoa
c1149	AYV89171.1					Metazoa
c1150	WP_057439818.1					Bacteria
c1152	PWA80522.1					Viridiplantae
c1154	PKP72403.1					Bacteria
c1155	KNZ72022.1					Fungi
c1157	WP_031278423.1
c1158	RPB19270.1					Fungi
c1159	WP_153107864.1					Bacteria
c1160	WP_084455243.1
c1161	PSN40239.1					Metazoa
c1162	WP_143652006.1					Bacteria
c1163	WP_079639964.1					Bacteria
c1164	PCI15779.1					Bacteria
c1165	PCI15333.1					Bacteria
c1166	WP_124733927.1					Bacteria
c1167	WP_149499401.1					Bacteria
c1168	BAT62473.1					Fungi
c1169	SDD82120.1					Bacteria
c1170	WP_111575957.1					Bacteria
c1171	TNF77616.1					Bacteria
c1172	WP_136257674.1					Bacteria
c1173	XP_028134080.1					Metazoa
c1175	RME91406.1					Bacteria
c1176	KAE8747709.1					Metazoa
c1177	WP_110773207.1					Bacteria
c1178	GBO34091.1					Metazoa
c1179	GBM61520.1					Metazoa
c1180	WP_079300062.1					Bacteria
c1182	PHR98904.1					Bacteria
c1183	HHE64503.1					Bacteria
c1185	RHZ22517.1					Sar
c1186	WP_044537027.1					Bacteria
c1188	WP_100716201.1					Bacteria
c1189	AGQ19576.1					Bacteria
c1190	GEA09869.1					Bacteria
c1191	PRP77605.1
c1192	EFJ36204.1					Viridiplantae
c1193	CDP28838.1					Fungi
c1194	WP_138168151.1					Bacteria
c1195	MPC56075.1					Metazoa
c1196	XP_021949551.1					Metazoa
c1197	WP_089835485.1					Bacteria
c1198	RAL61790.1					Fungi
c1199	GBO16464.1					Metazoa
c1201		Aco
c1202	VBB73951.1					Fungi
c1203	RPD55966.1					Fungi
c1204	WP_109508543.1					Bacteria
c1205	WP_110871773.1					Bacteria
c1206	AYV85190.1
c1207	KYO29797.1					Metazoa
c1208	TEY62499.1					Fungi
c1209	WP_006997060.1					Bacteria
c1210	MBO68525.1					Bacteria
c1211	XP_014257187.1					Metazoa
c1212	HCV25304.1					Bacteria
c1214	XP_007365610.1					Fungi
c1216	ROT61841.1					Metazoa
c1217	XP_011568407.1					Metazoa
c1218	XP_030036407.1					Metazoa
c1219	MXW61592.1					Bacteria
c1220	RWS25260.1					Metazoa
c1221	WP_139345722.1					Bacteria
c1222	SJL14156.1					Fungi
c1223	BAD03722.1					Viridiplantae
c1224	XP_033666187.1					Fungi
c1225	XP_021000174.1					Metazoa
c1226	TXT11193.1					Fungi
c1227			Ulmu6-GMC
c1228	VEN57081.1					Metazoa
c1229	PSR77915.1					Fungi
c1230	GAA87821.1					Fungi
c1231	WP_006974483.1					Bacteria
c1232	XP_016227357.1					Fungi
c1233	KAF3050148.1					Fungi
c1234	XP_021949181.1					Metazoa
c1235	XP_026678725.1					Metazoa
c1236	EKD41200.1					Bacteria
c1238	WP_054262835.1					Bacteria
c1239	WP_092954443.1					Bacteria
c1240	OXA42327.1					Metazoa
c1241	MPZ70339.1					Bacteria
c1242	XP_018255645.1					Fungi
c1244	XP_021955766.1					Metazoa
c1245	PRP81989.1
c1246	WP_056021089.1					Bacteria
c1248	XP_023237893.1					Metazoa
c1250	WP_007807616.1					Bacteria
c1251	HAM03165.1					Bacteria
c1252	BAV65596.1					Bacteria
c1253	WP_108799785.1					Bacteria
c1254		Ncr1	Ncr-(COX)
c1255	SMR53044.1					Fungi
c1256	KAF2763890.1					Fungi
c1257	VDM84180.1					Metazoa
c1258	WP_056180790.1					Bacteria
c1259	PYO65246.1					Bacteria
c1260	VWX32478.1					Bacteria
c1261	WP_033036327.1					Bacteria
c1262	WP_007240947.1					Bacteria
c1263	EEB89286.1					Fungi
c1264	OHB41038.1					Bacteria
c1265	MAK82779.1					Bacteria
c1266	WP_133951414.1					Bacteria
c1267	WP_099653935.1					Bacteria
c1268	WP_056735165.1					Bacteria
c1269	WP_048441515.1					Bacteria
c1270	XP_021962181.1					Metazoa
c1271	XP_008548155.1					Metazoa
c1272	HET75899.1					Bacteria
c1273	CZR61929.1					Fungi
c1274	WP_159471399.1					Bacteria
c1276	WP_110763397.1					Bacteria
c1277	WP_158720777.1					Bacteria
c1278	ORY41641.1					Fungi
c1279	GAU46199.1					Viridiplantae
c1280	WP_082408389.1
c1281	RWP58621.1					Bacteria
c1282	WP_157043444.1					Bacteria
c1283	VVC95460.1					Metazoa
c1285	OZJ06716.1					Fungi
c1286		Mbr
c1287	KAB2624544.1					Viridiplantae
c1288	ORY94736.1					Fungi
c1289	PPQ69279.1					Fungi
c1290	WP_133985392.1					Bacteria
c1291	SMF11991.1					Bacteria
c1292	XP_017997052.1					Fungi
c1293	WP_134068548.1					Bacteria
c1294	HDY04497.1					Bacteria
c1295	XP_015514722.1					Metazoa
c1296	XP_003343854.1					Fungi
c1297	XP_002141916.1					Sar
c1298	RKZ50493.1					Bacteria
c1299	SGL68001.1					Bacteria
c1300			Mtu-GMC
c1301	KAE9365780.1					Fungi
c1303	TMF36366.1					Bacteria
c1305	PYQ29945.1					Bacteria
c1306	WP_162738858.1					Bacteria
c1307	TMQ06564.1					Bacteria
c1308	XP_031636377.1					Metazoa
c1310	WP_159168884.1					Bacteria
c1311	RPI41484.1					Bacteria
c1312	OQX68735.1					Bacteria
c1313	KAA6424430.1					Viridiplantae
c1314	OAI54597.1					Bacteria
c1315	WP_166159639.1					Bacteria
c1317	TMF52738.1					Bacteria
c1318	SBT06542.1					Bacteria
c1319	MBA00685.1					Bacteria
c1320	OGA45946.1					Bacteria
c1321	WP_013797421.1					Bacteria
c1322	GEV41489.1					Viridiplantae
c1323	RDW84957.1					Fungi
c1324	XP_025492123.1					Fungi
c1325	OII77924.1					Sar
c1327	XP_025262777.1					Metazoa
c1328	OGA96153.1					Bacteria
c1329	XP_021967125.1					Metazoa
c1330	PYN58450.1					Bacteria
c1331	XP_019874293.1					Metazoa
c1332	GAK20829.1					Bacteria
c1333	GDX76219.1					Bacteria
c1334	XP_007713272.1					Fungi
c1335	KAF3862808.1					Fungi
c1337	KFB42236.1					Metazoa
c1338	XP_029718589.1					Metazoa
c1340	XP_022125326.1					Metazoa
c1341	PGH23387.1					Fungi
c1342	KKY28688.1					Fungi
c1343	WP_084434182.1					Bacteria
c1344	RMY55131.1					Fungi
c1345	GAA83592.1					Fungi
c1346	WP_083844744.1					Bacteria
c1347	TMJ94844.1					Bacteria
c1348	RYP51424.1					Fungi
c1349	KAE8319577.1					Fungi
c1350	RWW27749.1					Viridiplantae
c1351	HEL18443.1					Bacteria
c1352	WP_158756567.1					Bacteria
c1354	RMF30762.1					Archaea
c1356	PZC86304.1					Metazoa
c1357	OCK76010.1					Fungi
c1358	BCB83104.1					Bacteria
c1359	HBQ09839.1					Bacteria
c1360	TBU27837.1					Fungi
c1361	WP_013998825.1					Archaea
c1363	BBD96771.1					Bacteria
c1364	WP_113316862.1					Bacteria
c1365	HCK61160.1					Bacteria
c1366	XP_031944652.1					Fungi
c1367	TIX41415.1					Bacteria
c1368	WP_037398433.1					Bacteria
c1369	WP_158897565.1					Bacteria
c1370	WP_129764720.1					Bacteria
c1371	WP_068187774.1					Bacteria
c1372	WP_071098365.1					Bacteria
c1373	BAN23911.1					Bacteria
c1374	RKL03358.1					Fungi
c1377	WP_146454055.1					Bacteria
c1378	PIL28620.1					Fungi
c1379	OGN90888.1					Bacteria
c1380	KAB7494454.1					Metazoa
c1382	XP_031330249.1					Metazoa
c1384	WP_062603509.1					Bacteria
c1385	WP_093701062.1					Bacteria
c1386	WP_153500901.1					Bacteria
c1387	MAX55513.1					Bacteria
c1388	WP_102791107.1					Bacteria
c1389	WP_035235017.1					Bacteria
c1390	WP_161319839.1					Bacteria
c1391	WP_022985223.1					Bacteria
c1392	WP_023446493.1					Bacteria
c1393	WP_126339469.1					Bacteria
c1394	WP_092852580.1					Bacteria
c1395	WP_055678142.1					Bacteria
c1396	WP_144341228.1					Bacteria
c1397	PIE10767.1					Bacteria
c1398	WP_154160819.1					Bacteria
c1399	RLN87503.1					Sar
c1400	WP_008829823.1					Bacteria
c1401	CDZ36015.1					Bacteria
c1402	WP_012166320.1					Bacteria
c1403	WP_101515681.1					Bacteria
c1404	KFA45449.1					Fungi
c1405	CCC86184.1					Bacteria
c1406	GBP07450.1					Metazoa
c1407	PHJ25726.1					Sar
c1408	RZR63265.1					Fungi
c1409	SFJ02390.1					Bacteria
c1410	TMI98632.1					Bacteria
c1411	GAP60944.1					Bacteria
c1413	RYH14455.1					Archaea
c1414	XP_011051127.1					Metazoa
c1415	XP_023707385.1					Metazoa
c1416	HBI48658.1					Bacteria
c1417	KYP62436.1					Viridiplantae
c1418	WP_082519894.1					Bacteria
c1419	CPZ71924.1					Bacteria
c1420	WP_162579278.1					Bacteria
c1421	TYK10894.1					Viridiplantae
c1422	HFD80515.1					Bacteria
c1423	MBS34908.1					Bacteria
c1424	XP_022830641.1					Metazoa
c1425	KIK79731.1					Fungi
c1426	WP_155879177.1					Bacteria
c1427	XP_018161831.1					Fungi
c1428	WP_132316033.1					Bacteria
c1429	CDP07225.1					Viridiplantae
c1430	OXA41478.1					Metazoa
c1431	WP_158821834.1					Bacteria
c1433	CRK22688.1					Fungi
c1434	WP_132669162.1					Bacteria
c1435	CEH12012.1					Fungi
c1436	WP_132830297.1					Bacteria
c1438	HBO91027.1					Bacteria
c1439	GBP43981.1					Metazoa
c1440	MBT76779.1					Bacteria
c1441	GAO24173.1					Bacteria
c1442	WP_028221441.1					Bacteria
c1443	XP_001848853.1					Metazoa
c1444	MBU52749.1					Bacteria
c1445	XP_007829301.1					Fungi
c1446	ROV88577.1					Fungi
c1447	WP_006132855.1					Bacteria
c1448	TFK55509.1					Fungi
c1449	MAW06968.1					Bacteria
c1450	KUK71105.1					Archaea
c1451	WP_033455226.1					Bacteria
c1453	ARF08384.1
c1454	XP_023243333.1					Metazoa
c1455	HFW33199.1					Archaea
c1457	YP_009001244.1
c1458	XP_015795596.1					Metazoa
c1459	RLI82480.1					Archaea
c1460			Pdu-HNL		Q945K2
c1461					B9X0I1
c1462	BAH23314.1					Viridiplantae
c1463		Pdu-HNL			O24243
c1464	OGT32447.1					Bacteria
c1465	RME75857.1					Bacteria
c1466	KYC48869.1					Archaea
c1467	NCW26904.1					Bacteria
c1468	WP_008580475.1					Bacteria
c1469	KSV72021.1					Bacteria
c1470	XP_027193791.1					Metazoa
c1471	WP_095866069.1
c1472	XP_014671615.1					Metazoa
c1473	XP_024530422.1					Viridiplantae
c1474	VTL97132.1					Bacteria
c1475	XP_023022042.1					Metazoa
c1476	KAF2890483.1					Metazoa
c1478	SKZ77141.1					Bacteria
c1479	WP_020406400.1					Bacteria
c1480	PZC46515.1					Bacteria
c1481	ODN00471.1					Metazoa
c1482	OGP60300.1					Bacteria
c1483	PPR20701.1					Bacteria
c1484	PPR62796.1					Bacteria
c1485	WP_133687564.1					Bacteria
c1486			Smo2-GMC
c1487	WP_118942341.1					Bacteria
c1488	XP_021953452.1					Metazoa
c1489	WP_130612054.1					Bacteria
c1490	WP_114941432.1					Bacteria
c1491	WP_044208099.1					Bacteria
c1492	WP_153412198.1					Bacteria
c1493	GAA85300.1					Fungi
c1494	XP_008087399.1					Fungi
c1495	WP_159111680.1					Bacteria
c1496	WP_114685871.1					Bacteria
c1497	WP_046592344.1					Bacteria
c1498	RYP68935.1					Fungi
c1503	CCO32637.1					Fungi
c1504	WP_051478972.1					Bacteria
c1505	CZR66954.1					Fungi
c1506	XP_021938212.1					Metazoa
c1507	WP_069164102.1					Bacteria
c1508	XP_021959777.1					Metazoa
c1509	WP_014371182.1					Bacteria
c1511	KAF3037871.1					Fungi
c1512	SBV34976.1					Bacteria
c1513	WP_137681669.1					Bacteria
c1514	OJW59818.1					Bacteria
c1515	XP_022388630.1					Fungi
c1516	WP_100784609.1					Bacteria
c1517	XP_007395102.1					Fungi
c1518	WP_102130110.1
c1519	TVR02781.1					Bacteria
c1521	ORY78631.1					Fungi
c1522	KIJ55870.1					Fungi
c1523	WP_021075780.1					Bacteria
c1524	WP_061026538.1					Bacteria
c1525	WP_014370804.1					Bacteria
c1526	WP_165195425.1					Bacteria
c1528	CRK94781.1					Metazoa
c1529	HBT33347.1					Bacteria
c1530	WP_173979331.1					Bacteria
c1531	KAE9466204.1					Viridiplantae
c1532	WP_090879720.1					Bacteria
c1533	OQX69691.1					Bacteria
c1534	WP_073560087.1					Bacteria
c1535	WP_079600330.1					Bacteria
c1536	RYP41820.1					Fungi
c1537	WP_146825198.1					Bacteria
c1538	PYQ18284.1					Bacteria
c1539	WP_106395366.1					Bacteria
c1540	MPZ52238.1					Bacteria
c1541	THD59325.1					Bacteria
c1542	KAE8307632.1					Fungi
c1544	ERL90016.1					Metazoa
c1545	XP_012251319.1					Metazoa
c1546	PSN44247.1					Metazoa
c1547	VVC98778.1					Metazoa
c1548	HBR65813.1					Bacteria
c1549	WP_055100737.1					Bacteria
c1550	GAD97845.1					Fungi
c1552	TBR24803.1					Bacteria
c1553	PYO47325.1					Bacteria
c1554	XP_011439691.1
c1555	OAE23557.1					Viridiplantae
c1556	KAD7478010.1					Viridiplantae
c1557	GFG81813.1					Bacteria
c1558	KDQ20011.1					Fungi
c1559	XP_005845040.1					Viridiplantae
c1561	KAB7493783.1					Metazoa
c1562	PFH47421.1					Fungi
c1563	TVY80304.1					Fungi
c1564	XP_030036531.1					Metazoa
c1565	KYG40825.1					Fungi
c1566	HET50019.1					Bacteria
c1567	KAF2661414.1					Fungi
c1568	TAL06977.1					Bacteria
c1569	EPJ44287.1					Bacteria
c1570	WP_137947036.1					Bacteria
c1571	RSL55913.1					Fungi
c1572	CEL11891.1					Fungi
c1573	WP_111649612.1					Bacteria
c1574	BAL26903.1					Bacteria
c1575	WP_139651716.1					Bacteria
c1576	VVS91500.1					Bacteria
c1577	TVR72984.1					Bacteria
c1578	WP_134820828.1					Bacteria
c1579	PJF43792.1					Bacteria
c1580	WP_056361399.1					Bacteria
c1581			Rso-(CHD)
c1582	WP_068626302.1					Bacteria
c1584	NBR38115.1					Bacteria
c1585	MPC16806.1					Metazoa
c1586	KIO28859.1					Fungi
c1587	PYP91216.1					Bacteria
c1588	WP_129790124.1					Bacteria
c1589	NCY23062.1					Bacteria
c1590	XP_033547702.1					Fungi
c1591	KON85962.1					Bacteria
c1592	OPZ10195.1					Bacteria
c1595	WP_143948861.1					Bacteria
c1596	KAF2767252.1					Fungi
c1597	VDP23746.1					Metazoa
c1598	MXX49297.1					Bacteria
c1599	NNJ64637.1					Bacteria
c1600	NCF61374.1					Bacteria
c1601	SFU19489.1					Bacteria
c1602	WP_114197743.1					Bacteria
c1603	WP_103955610.1					Bacteria
c1604	XP_006958958.1					Fungi
c1605	WP_155535545.1					Bacteria
c1606	XP_034123761.1					Metazoa
c1607	XP_031331045.1					Metazoa
c1608	VEN58386.1					Metazoa
c1609	OGU42917.1					Bacteria
c1610	TLX90299.1					Archaea
c1611	PVH96882.1					Fungi
c1613	WP_140469546.1					Bacteria
c1615	PYR89872.1					Bacteria
c1616	XP_018993034.1					Fungi
c1617	CZR68556.1					Fungi
c1618	WP_109566470.1
c1619	XP_030851076.1					Metazoa
c1620	SJL13090.1					Fungi
c1621	KXS15897.1					Fungi
c1623	OCB89708.1					Fungi
c1624	RUM92880.1					Bacteria
c1625	HFK20878.1					Archaea
c1626	PZM84273.1					Bacteria
c1627	WP_056655339.1					Bacteria
c1628	WP_079723330.1					Bacteria
c1629	NDH53109.1					Bacteria
c1630	WP_077330947.1					Bacteria
c1631	WP_117291001.1					Bacteria
c1632	VVD33611.1					Bacteria
c1633	WP_149754410.1					Bacteria
c1634	KAF2086275.1					Fungi
c1635	WP_092629951.1					Bacteria
c1636	WP_160121046.1					Bacteria
c1637	WP_143880297.1					Bacteria
c1638	PIE21847.1					Bacteria
c1639	XP_002430812.1					Metazoa
c1640	WP_156103324.1					Bacteria
c1641	EHL00375.1					Fungi
c1642	ROT61189.1					Metazoa
c1643	KAK48167.1					Bacteria
c1644	GAW00623.1					Fungi
c1645	TXI50859.1					Bacteria
c1646	WP_158984670.1					Bacteria
c1647	WP_115843407.1					Bacteria
c1648	WP_158733856.1					Bacteria
c1649	WP_151171385.1					Bacteria
c1650	WP_139716933.1					Bacteria
c1651	WP_137852633.1					Bacteria
c1652	NOT87223.1					Bacteria
c1653	OHE85150.1					Bacteria
c1654	TBR76238.1					Bacteria
c1655	WP_142808875.1					Bacteria
c1656	WP_043290476.1					Bacteria
c1657	ART40170.1					Bacteria
c1658	WP_012275115.1					Bacteria
c1659	WP_033964749.1					Bacteria
c1660	WP_025549961.1					Bacteria
c1661	WP_043154045.1					Bacteria
c1662	WP_166995580.1					Bacteria
c1663	WP_048897180.1					Bacteria
c1664	WP_094958968.1					Bacteria
c1665	WP_068328254.1					Bacteria
c1666	NUS39672.1					Bacteria
c1667	WP_106223807.1					Bacteria
c1668	WP_138243090.1					Bacteria
c1669	WP_065172176.1					Bacteria
c1670	WP_176284359.1					Bacteria
c1671	WP_044175525.1					Bacteria
c1672	WP_086958279.1					Bacteria
c1673	WP_148109236.1					Bacteria
c1674	WP_115059992.1					Bacteria
c1675	WP_069531532.1					Bacteria
c1676	WP_115426766.1					Bacteria
c1677	WP_176848971.1					Bacteria
c1678	WP_106261779.1					Bacteria
c1679	WP_109375084.1					Bacteria
c1680	WP_086366798.1					Bacteria
c1681	WP_068946783.1					Bacteria
c1682	WP_068969243.1					Bacteria
c1683	WP_106339451.1					Bacteria
c1684	WP_005299756.1					Bacteria
c1685	WP_154140013.1					Bacteria
c1686	NVO99200.1					Bacteria
c1687	WP_106142527.1					Bacteria
c1688	WP_158136122.1					Bacteria
c1689	OUS04771.1					Bacteria
c1690	NNF56659.1					Bacteria
c1691	WP_066044369.1					Bacteria
c1692	WP_136419154.1					Bacteria
c1693	WP_137834243.1					Bacteria
c1694	PKO31077.1					Bacteria
c1695	WP_177137349.1					Bacteria
c1696	OGA75307.1					Bacteria
c1697	OGB22314.1					Bacteria
c1698	OGB31059.1					Bacteria
c1699	OPZ13459.1					Bacteria
c1701	WP_137937158.1					Bacteria
c1702	WP_051415460.1					Bacteria
c1703	WP_133477348.1					Bacteria
c1704	WP_149351420.1					Bacteria
c1705	HAG98201.1					Bacteria
c1706	HCJ34343.1					Bacteria
c1707	HAE82282.1					Bacteria
c1708	WP_084199356.1					Bacteria
c1709	WP_146328780.1					Bacteria
c1710	WP_012566776.1		Rce-GMC			Bacteria
c1711	WP_054734532.1					Bacteria
c1712	PPD15904.1					Bacteria
c1713	WP_164977079.1					Bacteria
c1714	XP_017780006.1					Metazoa
c1715	XP_017492236.1					Metazoa
c1716	XP_014280954.1					Metazoa
c1717	KDQ32843.1					Fungi
c1718	XP_013105630.1					Metazoa
c1719	WP_159557758.1					Bacteria
c1720	TKA64898.1					Fungi
c1721	WP_015603188.1					Bacteria
c1723	KLU91319.1					Fungi
c1724	KOB69344.1					Metazoa
c1725	KTB47091.1					Fungi
c1726	KIP03509.1					Fungi
c1727	OAY48226.1					Viridiplantae
c1728	THH12608.1					Fungi
c1729			Gfr-(CBQ)
c1731	HFS85840.1					Bacteria
c1732	XP_008714742.1					Fungi
c1733	BAU01723.1					Viridiplantae
c1734	CRK97304.1					Metazoa
c1736	XP_025394716.1					Fungi
c1737	KYB26873.1					Metazoa
c1739	OQD88871.1					Fungi
c1740	WP_148765043.1					Bacteria
c1741	WP_160777457.1					Bacteria
c1742	WP_072396845.1					Bacteria
c1743	HAC59627.1					Bacteria
c1744	WP_008972934.1					Bacteria
c1745	CAB4637626.1
c1746	PYN72636.1					Bacteria
c1747	WP_044432393.1					Bacteria
c1748	TNF76395.1					Bacteria
c1749	WP_027159514.1					Bacteria
c1750	MBT59015.1					Bacteria
c1751	XP_025832466.1					Metazoa
c1752	CZT07593.1					Fungi
c1753	MBF87875.1					Bacteria
c1754	WP_068327286.1					Bacteria
c1755	ERL92577.1					Metazoa
c1756	KAF2821653.1					Fungi
c1757	XP_013086580.1					Metazoa
c1758	RYY88604.1					Archaea
c1759	CEJ92598.1					Fungi
c1760	MBS93935.1					Bacteria
c1762	WP_037457809.1					Bacteria
c1763		Pch-POX			Q6QWR1
c1764	XP_023223913.1					Metazoa
c1765	WP_144694711.1					Bacteria
c1766	XP_007269936.1					Fungi
c1767	XP_008487392.2					Metazoa
c1769	TKA32400.1					Fungi
c1770	KXN84007.1					Fungi
c1771	PHH65859.1					Fungi
c1772	XP_001831908.2					Fungi
c1773	KUN75097.1					Bacteria
c1774	MYD70470.1					Bacteria
c1775	XP_013105617.1					Metazoa
c1778	WP_096684185.1					Bacteria
c1779	KXJ13942.1					Metazoa
c1780	KZV67483.1					Fungi
c1781	MBC92140.1					Bacteria
c1782	WP_080495106.1					Bacteria
c1783	KAF1821568.1					Fungi
c1784	GAT52077.1					Fungi
c1785	XP_024708626.1					Fungi
c1786	KAE8736537.1					Metazoa
c1787	XP_008597037.1					Fungi
c1788	CCD52385.1					Fungi
c1789	KAE9385062.1					Fungi
c1790	WP_143331180.1					Bacteria
c1791	WP_138423240.1					Bacteria
c1792	CAB0031109.1					Metazoa
c1793	MPY87611.1					Bacteria
c1794	WP_155564503.1					Bacteria
c1795	TMB92773.1					Bacteria
c1796	TFY81442.1					Fungi
c1797	HAK53072.1					Bacteria
c1799	XP_023238130.1					Metazoa
c1800	XP_020433897.1
c1801	OEU13942.1					Sar
c1802	KAE8704752.1					Viridiplantae
c1803	CAN93646.1					Bacteria
c1804	KMQ52750.1					Bacteria
c1805	RYD73274.1					Bacteria
c1806	XP_007418421.1					Fungi
c1807	KAF2996170.1					Fungi
c1808	WP_160003387.1					Bacteria
c1809	KFH74217.1					Fungi
c1810	XP_023014616.1					Metazoa
c1812	XP_007367502.1					Fungi
c1814	KIN02243.1					Fungi
c1815	XP_022174784.1					Metazoa
c1816	XP_013338896.1					Fungi
c1817	SJL08487.1					Fungi
c1819	RMY58341.1					Fungi
c1820	MAJ93419.1					Bacteria
c1821	KFH65343.1					Fungi
c1822	WP_093348997.1					Bacteria
c1823	XP_014548746.1					Fungi
c1824	HGB08177.1					Bacteria
c1825	KNZ71288.1					Fungi
c1826	XP_007769936.1					Fungi
c1827	XP_021193310.1					Metazoa
c1828	PPJ57031.1					Fungi
c1829	XP_009547974.1					Fungi
c1830	TRY61644.1					Metazoa
c1831	WP_008968129.1					Bacteria
c1832	WP_121968889.1					Bacteria
c1833	GDX93772.1					Bacteria
c1834	SMQ45631.1					Fungi
c1835	BAU41472.1					Bacteria
c1836	TMM38063.1					Bacteria
c1837	SJK98715.1					Fungi
c1838	WP_063993638.1					Bacteria
c1839	KAF2099216.1					Fungi
c1840	KAF1957797.1					Fungi
c1841	EPB87888.1					Fungi
c1842	WP_154449137.1					Bacteria
c1843	WP_175485678.1					Bacteria
c1844	WP_145199440.1					Bacteria
c1845	MAF99872.1					Bacteria
c1846	RPJ38524.1					Bacteria
c1847	WP_045216664.1					Bacteria
c1848	WP_112989877.1					Bacteria
c1850	SEW37333.1					Bacteria
c1851	WP_133271297.1
c1852	GBP65442.1					Metazoa
c1853	XP_021370229.1					Metazoa
c1854	WP_113953062.1
c1855	MBQ48695.1					Bacteria
c1856	MAI10187.1					Bacteria
c1857	XP_022189526.1					Metazoa
c1858	BAM19497.1					Metazoa
c1859	RME74786.1					Bacteria
c1860	WP_037752107.1					Bacteria
c1862	XP_005775293.1
c1863	WP_139940254.1
c1864			Smo1-GMC
c1865	RWG07798.1					Bacteria
c1866	GAW17489.1					Fungi
c1868	CDZ28070.1					Bacteria
c1869	THU90831.1					Fungi
c1871	WP_085067354.1					Bacteria
c1872	KIY62253.1					Fungi
c1873	VDB87423.1					Fungi
c1874	WP_095866070.1					Bacteria
c1875	SDI31775.1					Bacteria
c1877	MSW52164.1					Bacteria
c1878	OAE35017.1					Viridiplantae
c1879	XP_021943850.1					Metazoa
c1880	WP_083543466.1					Bacteria
c1881	WP_081744588.1					Bacteria
c1882	XP_008719882.1					Fungi
c1883	EMR67908.1					Fungi
c1884	WP_023807599.1					Bacteria
c1885	KRG99452.1					Viridiplantae
c1887	RZV56586.1					Bacteria
c1888	PYM59831.1					Bacteria
c1889	MAB12323.1					Bacteria
c1890	ODM88664.1					Metazoa
c1891	KZL81536.1					Fungi
c1892	BAD03765.1					Viridiplantae
c1893	MBS04832.1					Bacteria
c1895	XP_551275.4					Metazoa
c1897	GAL70480.1					Bacteria
c1898	WP_107676337.1					Bacteria
c1900	OLC69852.1					Bacteria
c1901	WP_021691327.1					Bacteria
c1902	XP_021947080.1					Metazoa
c1903	GAF49769.1					Bacteria
c1904	WP_037448973.1					Bacteria
c1905	XP_028490337.1					Fungi
c1906	XP_020243531.1					Viridiplantae
c1908	BAS11459.1					Bacteria
c1909	WP_090648642.1					Bacteria
c1910	VBB78491.1					Fungi
c1911	WP_087573852.1					Bacteria
c1912	WP_111344801.1					Bacteria
c1913	RKK03346.1					Bacteria
c1914	GEQ98665.1					Bacteria
c1915	XP_031865251.1					Fungi
c1916	WP_127871958.1					Bacteria
c1917	KHN72706.1					Metazoa
c1918	MYF61313.1					Bacteria
c1919	WP_135909920.1					Bacteria
c1920	KZT60497.1					Fungi
c1921	XP_011550252.1					Metazoa
c1922	XP_627167.1					Sar
c1924	TNE88280.1					Bacteria
c1925	XP_019638721.1					Metazoa
c1926	OAV90822.1					Fungi
c1927	KUI64316.1					Fungi
c1928	ODM92682.1					Metazoa
c1929	WP_096087421.1					Bacteria
c1930	RMF11592.1					Bacteria
c1931	CCD52110.1					Fungi
c1932	TMM10955.1					Bacteria
c1933	WP_054310169.1					Bacteria
c1934	XP_001275961.1					Fungi
c1935	WP_161602506.1					Bacteria
c1936	WP_081865400.1					Bacteria
c1939	CDI74588.1					Sar
c1940	KAE8739392.1					Metazoa
c1941	XP_025099044.1					Metazoa
c1942	WP_138687502.1					Bacteria
c1943	XP_018005105.1					Fungi
c1944	WP_109772643.1					Bacteria
c1945	CDZ58493.1					Bacteria
c1946	WP_078488339.1					Bacteria
c1947	WP_148296513.1					Bacteria
c1948	CRK24002.1					Fungi
c1949	WP_120201705.1					Bacteria
c1950	WP_106285819.1					Bacteria
c1951	YP_009448335.1
c1952	XP_007822756.1					Fungi
c1953	SCF66629.1					Bacteria
c1954					T2M2J4
c1955			Ulmu4-GMC
c1956	KFM82935.1					Metazoa
c1957	KZM94904.1					Viridiplantae
c1958	OJT15702.1					Fungi
c1959	XP_003880326.1					Sar
c1960	GAM82355.1					Fungi
c1962	WP_037381124.1					Bacteria
c1963	XP_011127379.1					Fungi
c1964	ODM92761.1					Metazoa
c1965	XP_007326305.1					Fungi
c1966	XP_009227106.1					Fungi
c1967	KRT65112.1					Bacteria
c1968	XP_024394337.1					Viridiplantae
c1969	OXA54860.1					Metazoa
c1970	RYP23895.1					Fungi
c1971	WP_125007047.1
c1973	XP_012182724.1					Fungi
c1974	KNZ74015.1					Fungi
c1975	WP_135770135.1					Bacteria
c1976	TCD66861.1					Fungi
c1977	KLU89505.1					Fungi
c1978	WP_142701418.1					Bacteria
c1979	KAE8316234.1					Fungi
c1980	MAT27849.1					Bacteria
c1981	TFY79641.1					Fungi
c1982	WP_113480335.1					Bacteria
c1983	RYP37128.1					Fungi
c1984	WP_138007430.1					Archaea
c1985	WP_094789421.1					Bacteria
c1987	WP_050525191.1					Bacteria
c1988	XP_018021145.1					Metazoa
c1989	KAF2462356.1					Fungi
c1990	RXW14759.1					Fungi
c1991	RZL00777.1					Bacteria
c1993	RMF19273.1					Bacteria
c1995	GAV14850.1					Bacteria
c1996	XP_019768586.1					Metazoa
c1997	WP_165001739.1					Bacteria
c1998	WP_149480741.1					Bacteria
c1999	HBI03999.1					Bacteria
c2000	GAC76841.1					Fungi
c2001	WP_085852748.1					Bacteria
c2002	XP_017473552.1					Metazoa
c2003	OUT64178.1					Bacteria
c2004	KAF2313219.1					Viridiplantae
c2005	XP_011553470.1					Metazoa
c2006	KAA3611406.1					Bacteria
c2007	WP_156528667.1					Bacteria
c2008			Ath4-GMC
c2009	XP_024734487.1					Fungi
[truncated: 4,683 more rows]
