# Supplementary material
Source: MDPI journal article supplement (https://www.mdpi.com/2073-4344/10/9/1072)
Supplement: s1 [file s1 › catalysts-923799-sm-r1/Supplementary Dataset 4.tre]

((((c5186:0.547781719,(c2183:0.493730084,(c1393:0.438574263,c1321:0.454042039):0.028303310):0.053809234):0.055729275,c3610:0.381657392):0.057206622,(c2581:0.379275844,(c3392:0.402282458,c5081:0.321061192):0.087660109):0.038375374):0.046156637,((c415:0.435734903,c1397:0.386563028):0.089729906,(c3594:0.362246100,c3735:0.453473875):0.060516929):0.101476620,((((((((c1569:0.084468231,(c4774:0.101474179,c6278:1.958269818):0.261831283):0.372511596,(((c1418:0.416449545,c5909:0.417241022):0.148549413,(((c367:0.398663114,((c2399:0.347355085,c2770:0.400085214):0.205852712,(c466:0.484832726,(c3303:0.428558412,c5321:0.375157668):0.079836010):0.040420391):0.089534672):0.034579681,c5543:0.410924884):0.071892734,c5601:0.491565786):0.044945757):0.069376548,c6163:0.643998798):0.068490012):0.049816936,((c5819:0.337048848,c5430:0.441049413):0.089676714,((((c6037:0.117491111,(c827:0.119719232,c6569:0.162598463):0.040269297):0.101680262,c2938:0.570047253):0.073711234,((c2626:0.177762997,c5658:0.260280451):0.131485989,c6180:0.307448556):0.033061083):0.060961560,((c6162:0.195849090,(c1395:0.363956983,(c6465:0.141180349,(c3675:0.037589138,c6532:0.000000005):0.163643077):0.077909609):0.088072006):0.037678021,(c3416:0.371456504,(c3340:0.086481434,(c5389:0.111345418,c5643:0.136659335):0.081368365):0.196604657):0.099179718):0.092621004):0.036676622):0.051919801):0.060079629,((((((c1635:0.373936583,c5330:0.551520020):0.112111475,((c2622:0.333284948,(c5474:0.395411185,(c5716:0.413555894,(c4639:0.039100089,c5137:0.364694751):0.304202636):0.135717708):0.114547649):0.079998203,c5111:0.367592390):0.054860366):0.068421886,((c4903:0.456599015,(c5291:0.760355325,(c168:0.992662759,c2633:0.565685223):0.123933942):0.021656173):0.045948407,c1950:0.497718793):0.047750267):0.036291263,(c4147:0.392906483,c6021:0.480157762):0.146276898):0.058021857,(((c4766:0.382349069,(c4648:0.357657023,c4751:0.435625453):0.056313615):0.083051064,(c4022:0.414254231,c5510:0.378423564):0.113839941):0.059843282,c4154:0.363799911):0.080998785):0.027199576,c2772:0.512984483):0.030481685):0.031541695,((((c3212:0.371286401,(c3928:0.387227894,(c4794:0.337934565,c6531:0.535657639):0.116192432):0.104204234):0.108017853,((c3703:0.395561722,c5917:0.364289549):0.203883552,(c4829:0.538147754,(((c1618:0.339573165,c4893:0.549291061):0.096924559,c4227:0.449689085):0.086381130,(c2325:0.317959393,c4262:0.435713711):0.060183727):0.048250992):0.011411317):0.032623435):0.055779784,(((c3723:0.493438694,(c2337:0.418509446,(c2807:0.504510109,c4830:0.374278074):0.169325903):0.092168557):0.085574998,(((((((c6566:0.266037151,(c2968:0.859230060,c2673:0.189620627):0.064297606):0.105030744,(c1901:0.344648230,c3941:0.351397617):0.122063805):0.028139738,(c4743:0.334997667,c5320:0.382966443):0.090813401):0.040062354,(c2750:0.466290054,(c4384:0.397463968,c5770:0.351725706):0.072782742):0.052017063):0.047829168,((c569:0.451639465,(c5423:0.374597952,(c5181:0.326097900,c1916:0.377433397):0.040920807):0.078873331):0.044829458,(c5739:0.312405583,((c2606:0.178263872,((c450:0.212373168,(((c5044:0.076778505,((c4677:0.009652747,(c4675:0.019230038,((c3136:0.0,c4626:0.0):0.029977412,c4625:0.056171372):0.028577554):0.004904305):0.020722425,c4676:0.029019876):0.027698520):0.017207753,c4852:0.113342765):0.009834935,((c5625:0.056244561,(c1164:0.0,c1165:0.0):0.172261706):0.027632937,(c4674:0.086587803,(c4671:0.004851691,(c4673:0.019467486,c4672:0.009422266):0.008443183):0.087784336):0.021648664):0.035488928):0.065820731):0.067131481,(c6565:0.264405509,(c730:0.037524686,c4908:0.020109071):0.072017172):0.070277215):0.040563505):0.063611020,((c928:0.029775456,(c929:0.012955713,((c930:0.0,c931:0.0):0.005405242,c932:0.008250372):0.023265971):0.031459701):0.285616849,(c606:0.270177547,(c479:0.159551322,(((c1246:0.031950184,c1268:0.042968101):0.073939552,(c1541:0.096288500,(c1264:0.083800927,c1265:0.016774651):0.043609619):0.023764119):0.011757362,(c1115:0.099424756,(c691:0.036694528,c1010:0.038690905):0.078416278):0.046962033):0.039033036):0.038047459):0.085101083):0.075512020):0.073937534):0.041777003):0.025948694):0.027300035,(c4412:0.406450920,c374:0.394532121):0.096965051):0.014169019,(((((c5753:0.457159338,(c3123:0.445991062,(c2952:0.449418096,c4693:0.335295584):0.236143884):0.123390824):0.044441422,(c2045:0.354670409,c4120:0.416454593):0.092091564):0.041286027,((c2904:0.269267143,(c41:0.048704269,c1605:0.092960415):0.214559532):0.263085368,(c4571:0.227253939,c4767:0.221101010):0.088448945):0.038398255):0.034649065,((((c947:0.428642622,c3468:0.500202438):0.132274485,(((c2093:0.306543553,(c269:0.277354100,c3512:0.411722595):0.184682759):0.103667360,(c2451:0.426653704,c3622:0.490576532):0.183477077):0.074686069,((c513:0.381710624,c3938:0.476488331):0.094715853,c5319:0.425052583):0.026674264):0.041873090):0.021574073,((c2857:0.395900388,(c4162:0.379051446,c5410:0.306526451):0.116010067):0.055637770,((c4200:0.303204495,(c1487:0.412447577,c5580:0.305019695):0.077356173):0.104554401,c4186:0.376104054):0.066639676):0.037341200):0.037936869,((((c4799:0.371222188,((c4714:0.249484513,c6456:0.429039806):0.118398691,c5097:0.380061190):0.078244645):0.072434653,(((c5361:0.250644198,c6385:0.383054605):0.089966602,((c5516:0.058397386,c5942:0.170571881):0.282285349,(c1944:0.441355299,c4779:0.375669512):0.262305823):0.169810569):0.046222290,((c5843:0.251714314,(c3121:0.338987826,c3122:0.397777715):0.168618772):0.174652239,((c5454:0.527486140,(c4466:0.438355348,c5284:0.319239806):0.072869459):0.037218024,(c422:0.327698343,(c1317:0.239673102,c3661:0.211025304):0.143255161):0.073651711):0.038014836):0.086601295):0.030355979):0.024131980,((c1286:0.317665694,(c73:0.372023516,(c118:0.325316088,c3239:0.333492745):0.061568603):0.094787278):0.124574577,((c6032:0.225856629,((((c4193:0.059602804,(c6020:0.143686749,(c2950:0.140047090,c5414:0.000000005):0.022825888):0.012428349):0.121538410,c6449:0.322061654):0.040889900,((c65:0.257397739,c3671:0.051811631):0.136438228,c1399:0.155668490):0.104982554):0.034876852,(c3191:0.088011073,(c3176:0.000000005,c6577:0.000000005):0.006315499):0.106754542):0.113154117):0.046614795,((c3299:0.286121688,((c6442:0.073682285,(c308:0.040358580,(c309:0.002708263,c310:0.000000005):0.066699694):0.055797465):0.037621756,((c294:0.017072004,c4315:0.237249938):0.018296400,c295:0.032899560):0.059544156):0.107068568):0.282223882,(((c2816:0.313710483,(c1779:0.083749100,(c4185:0.058480890,c4734:0.023626023):0.121326372):0.203215889):0.056455496,((c102:0.158394360,c3060:0.147239540):0.143292089,c6660:0.222224042):0.057066080):0.011340566,(((c3074:0.204747502,(c3085:0.192370259,(c3156:0.127247241,c3670:0.296816826):0.107313674):0.197613511):0.064509420,(c2943:0.175969650,c6513:0.216839084):0.064040094):0.018516529,(((c82:0.081141407,(c6506:0.158709596,c6505:0.028520580):0.035667467):0.130998551,(((c228:0.077306084,((c6642:0.000000005,c6644:0.002777946):0.005228190,(c6643:0.002975094,c6677:0.005379935):0.011827941):0.018098775):0.148333493,(c6663:0.104054868,(c6640:0.020103733,c6641:0.008079444):0.060569311):0.053173994):0.074471642,(((c47:0.036544097,(c44:0.000000005,c45:0.006076300):0.030721089):0.079166305,(c293:0.075585447,c6423:0.054842195):0.080346068):0.065026041,((c131:0.127332303,(c256:0.080103666,c311:0.117444406):0.022210272):0.017240529,((c261:0.096334631,((c6390:0.039411024,c6392:0.022783241):0.012309399,(c292:0.033720479,(c6498:0.0,c6499:0.0):0.029333988):0.013566255):0.035937823):0.032964598,(((c104:0.089050835,((c226:0.017288049,c302:0.000000005):0.015091651,(c6381:0.028495522,c200:0.064609262):0.016787841):0.068679346):0.038858325,(c6393:0.025462947,(c31:0.010631214,c179:0.006577050):0.021860014):0.041335110):0.035878027,(c319:0.004043706,c320:0.004771278):0.061345771):0.083550226):0.028406208):0.048288759):0.047009190):0.056359327):0.055262677,(((((c6509:0.000000005,c6510:0.002705274):0.026767542,(c6507:0.021925725,(c6528:0.032672055,(c312:0.000000005,(c6453:0.000000005,(c6527:0.000000005,((c287:0.000000005,(c83:0.000000005,c240:0.000000005):0.000000005):0.000000005,c6333:0.000000005):0.000000005):0.000000005):0.000000006):0.018865214):0.003294189):0.029408346):0.063633938,(c6391:0.044542358,c6535:0.045608348):0.041002075):0.087556445,((c40:0.056151204,c6365:0.068905719):0.075277698,c6508:0.164370078):0.034003988):0.076565834,((c181:0.110326496,((c6337:0.0,c6338:0.0,c6339:0.0):0.128250455,c6639:0.127542740):0.046154177):0.044315358,((c443:0.035729737,c2090:1.061925109):0.057226930,(c1207:0.258694185,(c23:0.000000005,(c251:0.066418976,c6033:0.003099059):0.000001180):0.118315365):0.056711420):0.055651953):0.030863144):0.035265260):0.034562767):0.015930826):0.019176174):0.033862884):0.033010533):0.089593199):0.019552116,(((c4972:0.149709309,(c4976:0.101682333,(c1070:0.028355600,c4030:0.012009518):0.087529325):0.067940878):0.210112495,c2599:0.385573256):0.060005396,(c5269:0.237708898,(((c4522:0.187300097,((c110:0.005555405,(c107:0.0,c108:0.0,c109:0.0):0.000000006):0.000000006,(c106:0.000000006,c111:0.025277442):0.002769197):0.249625649):0.109287853,(c1574:0.246709243,(c1483:0.328727981,(c6404:0.038148530,(c6405:0.020710290,c6406:0.009715776):0.013226533):0.202941740):0.045601940):0.075551068):0.060863917,(((c76:0.065897524,c77:0.068219799):0.141116337,(c152:0.129530468,c2956:0.205267503):0.051185092):0.136946174,c4107:0.401417972):0.059126048):0.055100960):0.024238973):0.057431692):0.027416420):0.039011057):0.052250328,(((c5229:0.455815140,(c3852:0.374592197,(c5276:0.616455402,c4777:0.347145758):0.076598620):0.040551251):0.062170546,(c2267:0.543310494,((((((c3101:0.381305767,c5335:0.266203063):0.112857499,c841:0.447655970):0.058694535,(c5256:0.418090343,(c589:0.958505406,(c3728:0.177970754,c4711:0.967174985):0.625838402):0.202456381):0.115077341):0.033104344,c3619:0.439364643):0.057412846,((c3489:0.271414932,c5327:0.348879993):0.103578070,c1160:0.497259482):0.046393836):0.032345570,((c1514:0.408635853,(c4314:0.319133159,c5109:0.371122202):0.204562192):0.085462308,((c1513:0.401401533,(c1773:0.145231177,c4567:0.008572003):0.463079865):0.075348785,((c491:0.268766848,c2019:0.426260180):0.055704896,(c5581:0.329022336,c3574:0.353970722):0.054857187):0.038742227):0.054213149):0.074138310):0.053760668):0.035740861):0.064933036,(((((c828:0.446271063,c5328:0.338168502):0.102556485,(c3859:0.562892735,(c1601:0.447522969,(c4565:0.407313361,c4912:0.396539607):0.063510928):0.046475793):0.059607151):0.050622449,(c1077:0.262761881,(c4789:0.505960353,c1898:0.329413251):0.126329144):0.094481707):0.038816064,(c3704:0.304682906,c4768:0.413900974):0.117103866):0.058826130,c763:0.476644233):0.047937556):0.032835420):0.020741868):0.036311821):0.033850383,((((((((c6676:1.074531816,(c3118:1.039203057,c3878:0.908610464):0.153970085):0.266455817,c4183:1.014902428):0.129376892,(((c3736:0.382566147,c4633:0.406029608):0.293457084,(c1423:0.472301828,c4655:0.428955232):0.155749272):0.085255078,(c2844:0.000000016,c6024:0.520577913):0.594928782):0.037036653):0.040692411,(((c3577:1.083456598,c5030:0.542620527):0.192259264,((c5083:0.427795476,(c2013:0.730869804,c5505:0.442782345):0.053602863):0.102102413,(((((c1629:0.488615589,(c2386:0.351657590,c4028:0.540939495):0.289599534):0.097520448,(c4240:0.479129732,(c4137:0.646087341,(c354:0.264268546,c5365:0.276662063):0.091919432):0.041688479):0.051412070):0.058548545,((((c4627:0.362275673,c3689:0.438093314):0.045047157,((c4721:0.231582531,c4851:0.583063504):0.114975171,c6493:0.208468905):0.156218151):0.045279065,((c4370:0.324585731,c4523:0.409905897):0.072685139,(c4481:0.448903769,(c500:0.474851112,c1370:0.567624796):0.178706080):0.150581844):0.083631606):0.052735841,(((c3005:0.397467604,(((c5862:0.557578523,(c4228:0.277587993,c5548:0.575859882):0.134304470):0.111136567,c4793:0.422577758):0.188042709,((c2873:0.346919424,c3070:0.344052001):0.234381457,((c3957:0.434538446,c5764:0.315436258):0.143073729,(c609:0.396793498,c5528:0.446674239):0.107256094):0.176837421):0.101180214):0.105195537):0.062925285,((c1372:0.375004798,c5624:0.342823425):0.054343792,(c3233:0.320060259,c3604:0.447092289):0.065557582):0.047636721):0.164675775,((c1136:0.535517382,(c926:0.238193335,c2060:0.485149313):0.107749218):0.099821740,(c381:0.332643981,(c1035:0.452285911,c5447:0.394079123):0.149572737):0.106284926):0.064879742):0.041135676):0.037443973):0.050157359,(c2059:0.483062281,(c4376:0.484003145,c1276:0.298066571):0.121981489):0.058791913):0.070291824,(c352:0.318484941,c3515:0.345501796):0.277755384):0.075784025):0.059651476):0.054913447,(((c2659:0.521973751,c5369:0.570976747):0.090663798,(c766:0.381611602,c3676:0.474000605):0.279155633):0.079049873,(c521:0.413689741,c4657:0.659507397):0.194189493):0.083676081):0.067534501):0.037000915,((c3542:0.404080338,(c4806:1.352650473,(c404:0.457280497,c677:0.555292958):0.238844254):0.295815272):0.113079629,((c5468:0.393540971,(c3056:0.512314296,(c3451:0.299847807,c5600:0.432992137):0.097097804):0.076320127):0.158150846,(c6436:0.562902832,(c4841:0.580588128,c5038:0.835762328):0.081274548):0.080428322):0.049534092):0.013439514):0.009597973,((((((c366:0.328402087,((c2922:0.177208951,c4744:0.862848941):0.824323835,(c2511:0.614819974,c4568:1.072174066):0.232507620):0.221097047):0.485488313,((c5394:0.859321824,c5856:0.785993568):0.050832382,((((c658:0.396982002,c6005:0.441607858):0.560846621,c2837:0.818716448):0.000000005,c1633:1.226061158):0.147722330,c3848:0.769845949):0.078184594):0.112103038):0.039907376,(c4194:0.000000006,c4669:0.562766927):0.918177550):0.036460505,((c503:0.474149894,c3762:0.462501946):0.427172745,(c1862:0.965054064,c5257:0.439527852):0.190004332):0.188922872):0.072209990,((c446:0.677129612,c5496:0.581016121):0.146290467,c2625:0.497415423):0.162974804):0.038872068,((((c5562:0.854441039,(c4747:0.342141055,c3823:0.490927727):0.035037418):0.114301870,(c5379:0.398548322,(c5227:0.401709526,c449:0.486245409):0.063104436):0.044905663):0.070444103,(c5640:0.347049090,(c4839:0.446762398,(c3111:0.608952303,c5014:0.422544100):0.461174107):0.183086994):0.100787390):0.093546302,((c722:0.423925758,c5023:0.477421298):0.157647193,(c4569:0.613807698,(c4720:0.352997976,(c3197:0.000000005,c3926:0.106891572):0.673077635):0.145200866):0.079775605):0.092431357):0.051635550):0.048742238):0.024419844,((((c2519:0.483347541,c3677:0.582225667):0.213010028,(c1887:0.705259731,(c29:0.416215354,(c1143:0.162312273,c6618:0.297851176):0.468695307):0.072867225):0.098920745):0.053477038,((c254:0.385081564,(c3244:0.013726016,c5671:0.000000005):0.378391094):0.198910179,c1441:0.406581245):0.105859424):0.063311982,((c1896:0.794472849,c3556:0.651004489):0.096014024,((c1876:1.367575179,((((c6297:0.533478867,(c3664:0.625319854,c5941:0.564771221):0.159289655):0.064099891,((((c1565:1.485884158,c5900:0.000000005):0.212392915,(c3501:0.367861927,c2495:0.492613381):0.197128965):0.410992466,((c1323:0.546346359,c3391:1.792251387):0.168664162,(c653:0.847577382,(c3493:1.074140033,c3998:1.133602534):0.000000005):0.294618286):0.164506425):0.067948342,((c4:0.000000005,(c1275:0.512282561,c3363:0.718713995):0.037073013):0.546473691,(c1517:1.619687176,c382:0.560318614):0.309316235):0.048785595):0.003749487):0.098100806,(((((c2740:0.490063924,(((c1337:0.694716209,c5056:0.541144516):0.045194283,(c3220:0.519426885,c2269:0.640171394):0.153090918):0.187544293,(c2240:0.610210315,(c347:0.406463872,c2428:0.536883036):0.184698050):0.224765532):0.030586994):0.075251480,((c4248:0.600421775,((c2154:0.190308611,c6518:0.000000006):0.117585148,c496:0.481915304):0.314610328):0.229540535,c2423:0.657883077):0.096268403):0.045471516,((c3463:1.258413388,c5553:0.000000017):0.498246458,((((c2970:0.539389316,c5712:0.547482361):0.152321617,(c2929:0.043227060,(c3322:0.567535550,c3321:0.254709029):0.232256202):0.452580246):0.176630231,(((c1642:0.291418680,c4716:0.836529340):0.366790632,(c3183:0.631669103,(c4390:0.352602719,c3870:0.447312765):0.155538489):0.063947811):0.094779756,c6304:1.368027930):0.202973469):0.095835747,((c1161:0.198341492,c2863:0.962486814):0.272196001,((c714:0.356769483,c3328:1.173579059):0.318824497,((c3931:0.500224209,c5271:0.455371526):0.446846988,c1476:0.569806658):0.207980861):0.187195301):0.123812098):0.000000006):0.089344025):0.062875985,((((c1176:0.408221455,(c4135:0.000000006,c5344:5.100017679):0.643202557):0.063443358,c5094:0.746853465):0.123167540,c6208:0.358071808):0.082350582,(((c1720:0.480905347,c5968:0.837082459):0.378283459,((c3351:0.429593244,c4164:0.202115992):0.780295261,(c501:0.920076033,c1252:0.711973803):0.110955423):0.201252876):0.087781863,(c1184:0.692618408,c3694:0.519164479):0.347293653):0.171399609):0.028448620):0.017079847,c225:0.436282544):0.014832811):0.026482005,c3427:0.776395925):0.008283397):0.000000012,(c1065:0.650772673,(c4387:0.570836944,(c1247:0.488281767,c5200:0.813997073):0.200488869):0.052959524):0.113229096):0.012876134):0.027190355):0.054603200):0.028334088,((((c3882:0.489356534,c5215:0.421400147):0.120052443,(((c5386:0.310349666,(c1328:0.375718950,c5719:0.340258953):0.061143978):0.123020978,(((c4560:0.412687379,(c4060:0.340710347,c4286:0.549103235):0.086085713):0.089484399,(((c410:0.351283781,c3449:0.582601645):0.081201681,c4153:0.406402474):0.036750821,c419:0.409312172):0.082409724):0.022552272,(((c4006:0.316733704,c4471:0.490513390):0.088518782,(c3172:0.414870994,(c1371:0.266132875,c62:0.577725682):0.081409053):0.093833802):0.032238332,(c4418:0.421896894,c5331:0.502105287):0.131733542):0.030221477):0.027332135):0.047814598,((c4224:0.521072565,c5035:0.458865441):0.099654681,(((c1904:0.278524131,c4993:0.489122842):0.076838972,((c3349:0.155026184,c5312:0.322019454):0.068938726,(c5391:0.130661426,(c1914:0.155718075,c4452:1.211696547):0.167064335):0.082863600):0.055895823):0.071141619,(((c1139:0.351605629,c1239:0.437050602):0.083670031,c4132:0.590328911):0.052286698,c3437:0.374919812):0.072820442):0.038420291):0.020311379):0.041491728):0.010424550,(((((((c3518:0.518827027,(c1166:0.333906971,c3569:0.420226737):0.041040216):0.090850683,(c3444:0.322207461,c4119:0.318947991):0.102525541):0.072406006,c4066:0.403828649):0.047799752,((c1580:0.307401796,c5417:0.490006056):0.104864010,(c866:0.478668457,c4131:0.350951107):0.078889272):0.071926474):0.032720285,((((c3272:0.247719493,c6335:0.749440280):0.109767321,((c80:0.200021990,c81:0.137556548):0.044574252,c5463:0.798821514):0.094275592):0.060599241,(c5746:0.259265330,c5345:0.405097672):0.077318028):0.058983870,(((((((c3775:0.416975324,(c3680:0.369752619,c4477:0.249713061):0.085482078):0.057607634,(c1797:0.533994915,(c5885:0.327365676,(c1640:0.352136540,(c4703:0.367673080,c1884:0.424513505):0.060056849):0.067754836):0.030664711):0.031730974):0.053473296,c2134:0.432867554):0.048166985,((c5348:0.511915748,(c1277:0.332561294,c1384:0.390097135):0.089203604):0.083294090,c3429:0.446838431):0.010276977):0.061639353,(c607:0.380969848,c5399:0.315980949):0.081052602):0.105604536,c1434:0.442978284):0.028445598,(c1186:0.339832203,c1159:0.443836521):0.159110436):0.044135909):0.029811590):0.018090364,((((c1257:0.678367057,c5970:0.367436091):0.150236834,(c5364:0.415841406,(c2847:0.385306188,((((c3627:0.326365774,c5355:0.410675238):0.059738123,c5280:0.454883981):0.033789726,(c5026:0.291288066,c4663:0.434625811):0.072066321):0.051975250,((c949:0.302321182,c1409:0.415967426):0.082608290,(c870:0.505824283,(c1526:0.452407745,c1584:0.354403955):0.099615175):0.113322267):0.034072342):0.036194472):0.034363091):0.032784079):0.086970352,(c4277:0.511067587,(c1638:0.528867687,c3084:0.261534109):0.022458628):0.096731691):0.049659593,(((c3300:0.377586763,c5688:0.330309989):0.101864457,(c6364:0.356860131,(c4658:0.312473219,c5486:0.503897347):0.046346046):0.029376476):0.046866558,((c5579:0.351170641,(c1319:0.352863596,c903:0.454423829):0.119344839):0.076976897,(c3461:0.396218731,c4547:0.438099012):0.080380258):0.056876438):0.018685609):0.014600564):0.033150048,((((((c4231:0.435139591,(c5155:0.363559137,(c1146:0.515815770,c1451:0.312570271):0.096350432):0.091270346):0.103599300,((c4152:0.493687359,c1549:0.588925938):0.101925871,c5224:0.328667713):0.073468377):0.032730336,(c562:0.395162099,(((c1012:0.231885445,c3462:0.279509311):0.180131117,c3607:0.372502533):0.065536865,((c4902:0.478593583,(c2809:0.188104733,c3864:0.277431119):0.237784144):0.037437471,c1320:0.307896821):0.030694778):0.075954758):0.055427546):0.044315459,(c1595:0.487169748,c3625:0.365771679):0.122559849):0.100811219,(((c4155:0.336934721,(c2693:0.482349183,(c2792:0.385159461,c5490:0.330807920):0.580164991):0.089466262):0.081707680,(c1369:0.359381005,((c321:0.376945667,c437:0.362801744):0.049134264,(c194:0.315109502,c594:0.149226197):0.134624593):0.043943822):0.039395862):0.045750056,(((c5487:0.506834865,(c299:0.235443527,(c6435:0.000000005,(c5534:0.021835193,c291:0.000000005):0.000000005):0.196607855):0.132856474):0.065794635,(c3467:0.311965307,c1484:0.399834532):0.073603065):0.058733647,c4167:0.406423157):0.108472227):0.054797386):0.048663285,(((((c959:0.248430325,(c2880:0.442038443,c2207:0.322167098):0.086839032):0.113622537,c1578:0.486214024):0.025320753,c1086:0.446753157):0.026738137,(c4697:0.436412203,(c3059:0.288015341,c2429:0.265045005):0.057602713):0.109629803):0.067455109,((c1868:0.419264422,(((c5029:0.372158601,c5470:0.434706144):0.078305523,(c4616:0.398417329,(c5738:0.314909937,(c2279:0.319280297,c6293:0.000000009):0.290282891):0.202981140):0.066637811):0.078695116,(c4266:0.496953892,((c795:0.332980647,(c3831:0.253406033,c3895:0.263052070):0.119908703):0.050968361,(((c6659:0.369810055,c1209:0.418296133):0.079634969,c6348:0.292515703):0.041440848,(c1581:0.216424720,c3544:0.194341852):0.052644100):0.041392859):0.034519396):0.069595456):0.057972725):0.046910880,(c6366:0.260872308,c6387:0.504621528):0.110338357):0.021048896):0.065689610):0.017132228):0.026592889):0.050828247,((((c4678:0.455107767,(c1141:0.362556700,(c1442:0.238463846,c6398:0.140319688):0.206773290):0.104060190):0.057120297,(c2489:0.471538521,c3968:0.415725625):0.049248715):0.051689550,(c6529:0.310501725,c6327:0.464126372):0.074119482):0.109569447,((c6269:0.789152749,c5578:0.378144947):0.103086926,(c6079:0.486491352,(((((c3048:0.430682609,(c376:0.323122683,c5815:0.393984870):0.089971498):0.038630207,c5611:0.591407901):0.051275836,((((c3329:0.426865891,c4190:0.299870696):0.114833077,c1711:0.439669316):0.058244463,((c2957:0.308832819,c5826:0.487733376):0.050031487,c4986:0.355913312):0.043401673):0.054780442,(c4702:0.335760947,(c520:0.355060409,c5813:0.000000012):0.437680513):0.112223896):0.036744783):0.100703820,((((c2170:0.292054022,c823:0.404629574):0.051328853,(c6259:0.404838562,(c3915:0.423492904,c4166:0.416927637):0.115401183):0.052614223):0.064925856,(((c3083:0.503951306,c4967:0.421776974):0.182006244,(c5822:0.541709077,(c3338:0.346139154,c6589:0.448977703):0.066238582):0.158951662):0.044329636,(c6018:0.486494812,(c4843:0.275174091,(c2167:0.380996990,c6121:0.394551193):0.207047438):0.080333092):0.141844294):0.066891073):0.035040326,(c3487:0.405948598,(c3177:1.090220627,c5887:0.651534913):0.225671684):0.163854356):0.025799103):0.063815309,((((c1396:0.328185852,c5609:0.381670931):0.133776433,(c728:0.529329454,((c5245:0.430840817,(c3666:0.377774802,(c4553:0.327027903,(c1018:0.335390301,c6036:0.347825983):0.076082848):0.063554225):0.055050714):0.165807063,(c1394:0.398486281,c5387:0.373828235):0.095730100):0.064271430):0.125191719):0.043630261,(c3656:0.479811253,(c3384:0.293146281,c5576:0.474638436):0.144189274):0.051879829):0.055817616,(((c2769:0.467850381,c4371:0.490182198):0.154088676,(c2604:0.394071315,c1368:0.334824200):0.061704561):0.049159309,c3469:0.409123843):0.054636448):0.035073717):0.031245714):0.037169624):0.041503733):0.039462746):0.010013315):0.015489849):0.022031601):0.018681269,(((((((((((((c3381:0.733714732,c2667:0.410826800):0.101490113,c5017:0.502201492):0.083463559,(c3571:0.743501065,c3576:0.000909678):0.429703758):0.089964651,((((((c5157:0.114655536,c6017:0.111002586):0.360557036,(c3100:0.032466108,c3979:0.131238376):0.222937987):0.203539672,(c5801:0.414137505,c2998:0.185982304):0.101215677):0.057182966,(c4555:0.378494803,(c5803:0.497271697,c36:0.269219333):0.146283215):0.116857638):0.041789263,(c4271:0.363699977,c3970:0.522890887):0.061443026):0.079925596,(c1627:0.986564020,c3759:0.455590793):0.228742675):0.081044291):0.009204283,c2692:0.568290442):0.108495194,(c1364:0.543791790,(c1492:0.746169190,c4089:0.548273663):0.247035087):0.020615336):0.151925994,(c4717:0.827570799,((c5927:0.732533900,(c1575:0.445837617,(c3573:0.343781925,c3711:0.298345536):0.154390032):0.259588293):0.287482517,(c4991:0.324381874,c5432:0.523736899):0.353110033):0.056661011):0.166985825):0.044877706,(((c577:0.505922711,c6512:0.707756159):1.743319739,((c1713:0.802804603,c5668:0.660776147):0.126533928,c2874:2.382670489):0.104241101):0.084715656,((c6324:2.928538181,c1907:1.420528916):0.234007935,(c4317:1.029910403,(c1738:1.464786143,(c4352:0.411421006,c5911:0.211949876):0.571051635):0.210477406):0.165649590):0.113552458):0.046111001):0.013696035,(((c434:1.812764225,(c1242:1.427545115,c2382:2.110143898):0.373776287):0.155701632,((c6539:0.838494375,c5351:0.533521852):1.124886483,((c787:2.528654979,c1407:2.112361548):0.775676441,(c400:1.751131349,(c4078:0.412631338,c3144:0.360812645):0.386713780):0.650983675):0.000000006):0.189688540):0.000000005,c32:0.885736834):0.089306894):0.034715859,((c6626:1.132222579,(((((((c5209:0.748300465,((c1803:0.259761778,c4525:0.589902987):0.341033796,c6125:0.635328618):0.118010946):0.142376633,(c1532:0.753375969,c3305:0.913412053):0.234302886):0.044256824,c2852:0.842242344):0.104681242,(((((c6530:0.515170283,(c2572:0.438863137,(c4400:0.484654734,c6450:0.394152175):0.101724046):0.185176321):0.088875185,((c1044:0.518304320,(((c5136:0.289139950,(c1038:0.450096779,c5641:0.425355205):0.162865429):0.142798171,(c414:0.506054317,c4535:0.438341127):0.259557895):0.146645826,(c3695:0.323911513,(c5239:0.492578572,(c4561:0.362891800,c4844:0.628585478):0.149291085):0.211922756):0.189052899):0.058002564):0.039842150,(((c5019:0.603675564,(c478:0.001944270,c4076:0.113256149):0.375663104):0.151580029,(c4562:0.619013849,c922:0.412607864):0.078279361):0.060317923,((c2914:0.490865475,c3354:0.426123412):0.051513683,(c5146:0.486574469,(c1099:0.518984885,(c1020:0.503389207,c4904:0.326960472):0.141191590):0.083890444):0.152753257):0.049541594):0.034353074):0.023176853):0.056839257,(c5336:0.685219126,((c5816:0.402577702,(c4103:0.402245342,c1206:0.521264916):0.091114385):0.308870629,((c4226:0.555416676,c3731:0.717547776):0.118457014,((c5176:0.519418969,(c5639:0.292597641,(c1490:0.458095535,(c2559:0.374429312,c6478:0.043377684):0.311669070):0.108654615):0.071598530):0.050478785,c2510:0.986554060):0.024885317):0.103734456):0.177229883):0.075650766):0.032126297,(((((c448:0.224135098,c4100:0.482779738):0.338688853,c4309:1.106521400):0.092340646,(c4268:0.521629809,c4776:0.124031057):0.454478106):0.084895004,(((c2098:0.659661868,c5258:0.580204051):0.088034063,c1419:0.733233406):0.057156793,(((c5233:0.559467306,c4682:0.464156189):0.428070118,c6358:0.982148182):0.238574139,(c51:1.024978435,(c801:0.612107541,c2191:0.095006660):0.498442360):0.557097710):0.149821544):0.125336708):0.084727999,((((c2381:0.519938335,((c5413:0.471427864,c6126:0.522196788):0.063117854,c4532:0.506552021):0.047389481):0.086064493,c2284:0.503760972):0.026491133,c384:0.766331037):0.080481603,((c5169:0.334727387,(c1303:0.486353834,c1795:0.189961149):0.352713219):0.153815332,((c5071:0.709190646,c5384:0.366595401):0.459316493,(((c957:0.415382213,c4534:0.596946000):0.043214272,((c1410:0.372844559,(c5357:0.587089584,c3699:0.419328240):0.094206637):0.237950145,c2244:0.560175049):0.060246769):0.048687645,(c4501:0.857621620,(((c600:0.436429784,c5910:0.617481806):0.159580416,c3385:0.391013988):0.067533907,(((c1480:0.602146938,c4848:0.493909055):0.086239657,((c2208:0.544091538,c3618:0.254589947):0.256844785,(c2249:0.654867541,c5961:0.399631506):0.118788076):0.130439804):0.079051225,(c5492:0.337335462,c5616:0.629638521):0.112818316):0.037076499):0.062964933):0.094904946):0.122772100):0.096835247):0.050395616):0.036548383):0.035642044):0.023163776,((c5586:0.715626713,(c1028:0.919943060,c6313:0.303020676):0.085520590):0.190530582,((((c5594:0.531581628,((c5086:0.565966813,(c727:0.488169245,(c3688:0.369561685,c733:0.455771295):0.054453064):0.046195393):0.127798523,(c1577:0.564111627,(((c6122:0.482045751,c5359:0.328287838):0.058549595,(c286:0.441760786,c3194:0.413473569):0.100455004):0.082361006,((c214:0.000000009,c5374:1.418473057):0.356809860,(c5866:0.661698767,(c3740:0.271579844,c3872:0.516689419):0.322527581):0.048372941):0.061088721):0.044673216):0.039025442):0.057264315):0.075790175,c3436:0.665992462):0.072446017,(c1100:0.322170343,(c4940:0.010358847,c5991:0.102011266):0.454730876):0.492199946):0.084386414,((c5814:0.550318248,(c4573:0.487689323,c4860:0.529732406):0.180330599):0.190120776,(((((c4533:0.411346444,(c2918:0.000000005,c6375:0.007897809):0.577209486):0.153630151,(c356:0.286152069,(((c2051:0.463255622,c5278:0.467118271):0.094966009,c2913:0.391550602):0.073236576,(((c3697:0.374183788,c1942:0.448143691):0.172122889,(c5555:0.501542096,(c1385:0.446975638,c3418:0.601506932):0.098311554):0.119637710):0.039351908,((c1598:0.620372781,c2917:0.286829643):0.138261513,((c2605:0.531502843,(c6492:0.366310335,(c372:0.667153519,(c113:0.000000005,c2774:0.027514622):0.412111767):0.087743611):0.091436832):0.072634270,((c3581:0.414040142,(c297:0.454632658,((c1045:0.392895792,c2719:0.483588588):0.090212210,c2698:0.448636394):0.053268957):0.040282488):0.066560993,(c1212:0.402878540,c3567:0.472075039):0.103901788):0.051933575):0.069657190):0.029257156):0.040934468):0.007843775):0.053161679):0.052535275,c2915:0.447648097):0.110178028,((((c3260:0.485682169,c3495:0.396517273):0.093246206,c3660:0.533220353):0.062180683,(((((c2920:0.465354154,c1875:0.397457240):0.176119307,(c5323:0.543214344,(c412:0.359604412,c4514:0.691088370):0.103878153):0.063429980):0.033796338,c2958:0.825211578):0.071598377,c452:0.499681825):0.083472111,(((c4792:0.447018245,(c680:0.437066248,c2916:0.419949440):0.132238313):0.120667497,((c2210:0.429379148,c5558:0.586114793):0.102065037,((c3860:0.444507607,c5352:0.398384257):0.119611752,c2072:0.591169224):0.078792733):0.054330765):0.090270978,c5296:0.613631847):0.051168180):0.082906354):0.071552553,(c3188:0.459373276,c3885:0.587011879):0.097536330):0.075050365):0.090991086,(c1877:0.518983761,(c445:0.279562269,c4645:0.582326488):0.262183835):0.144151012):0.034974453):0.034982689):0.045034138):0.029825761):0.038779629):0.007719260,((c5004:0.815186727,c5650:0.773995545):0.188239344,((c5247:0.745253879,(c3658:0.405323116,c5362:0.428574602):0.126827966):0.126848257,(((c3906:0.540150547,c4086:0.566886737):0.366988425,c1015:0.580610597):0.075504445,(c6540:0.646900997,(c4651:0.427181949,c637:0.635495289):0.067436485):0.074652528):0.096428416):0.116315536):0.183512852):0.060818673,((c1913:0.516030686,(c4171:0.307213070,c5707:0.781765850):0.236542373):0.233118965,((((c472:0.800078679,(c3080:0.386066022,c2091:0.708909759):0.125154479):0.092195472,(c1570:0.444303164,(c26:0.313627036,c3454:0.491127075):0.107876729):0.104599410):0.083801176,(((c5288:0.578820417,(c1781:0.451390186,(c2179:0.397079936,c3629:0.622788453):0.091954454):0.038492528):0.074938340,c850:0.573749113):0.089599392,((((c4392:0.108694341,c4786:0.110934130):0.358185802,(c812:0.426973818,c964:0.332887310):0.057922378):0.145645894,((c2969:0.594397022,(c1518:0.554320217,c4308:0.555094323):0.072098163):0.061223686,((c2577:0.545959228,c4849:0.355886644):0.175776896,((((((((c3167:0.503566762,c3412:0.473051434):0.080318265,c5311:0.410267341):0.047559423,c4361:0.398664831):0.051976978,((c4719:0.375678512,c5251:0.434088041):0.093022700,(c2574:0.516155506,(c593:0.044965489,c5835:0.039510947):0.319583441):0.107642122):0.036136951):0.048809417,((c5476:0.362859768,c5693:0.344338220):0.107201044,(c1636:0.463028582,c4628:0.438104304):0.078501481):0.054926833):0.047171372,c2462:0.633578694):0.007929488,((c1865:0.344867756,c5237:0.452649779):0.176407111,(c4001:0.356074064,c4691:0.366870915):0.082816984):0.129077744):0.032182740,(c4960:1.313220549,(c336:0.444759400,c4238:0.354733395):0.105239632):0.069891835):0.046736988):0.011922194):0.050794750):0.078388090,(c830:0.617200840,(((c803:0.675543952,c1163:0.411613160):0.103508074,((c377:0.215380897,c2161:0.511587826):0.162217366,c4117:0.412504150):0.106885836):0.128889657,((c3433:0.455417050,c3726:0.542426798):0.105758909,(c1420:0.429317393,c2905:0.498000279):0.131692766):0.070092748):0.047600681):0.039737672):0.050946410):0.046417559):0.056989005,((c5896:0.979195240,c5028:0.432629344):0.236683027,(c4149:0.746757828,c1871:0.531579562):0.119701011):0.083511169):0.137626796):0.014182523):0.141240576,((c6215:0.568535282,c3110:0.229199800):0.349496795,((c5747:0.462540659,c948:0.567458185):0.306868847,((c1573:0.513922574,(c4798:0.602949245,(c167:0.060859810,(c6638:0.047613879,(c159:0.154535792,c996:0.069069496):0.040614944):0.057529541):0.402389083):0.119400420):0.051621513,(c5667:0.703794962,(c937:0.485062506,c2307:0.406080217):0.244747150):0.110050803):0.118123707):0.054146255):0.096935697):0.049471869):0.034340036,((((c3480:0.762687356,c4024:0.673641953):0.192265288,c4870:0.909803519):0.049724414,(c1882:1.527745633,(c4609:0.768013714,((c3426:0.588136613,((c4243:0.000000006,c6031:1.529006603):0.743835895,(c1080:0.187580008,c1560:0.325829602):0.642738669):0.396450799):0.173434019,((((c1096:0.391747416,c5966:0.680727403):0.082612943,c790:0.390350674):0.080018288,c3054:0.489709488):0.067177061,(c5290:0.586963669,(((((c2009:0.482953543,(((c4393:0.249712027,c3985:1.018057717):0.350544334,(((c4444:0.401396883,(c779:0.395816728,(c4311:0.400549184,(c4957:0.420310112,((c758:0.227904503,c5860:0.445868824):0.077032443,c550:0.135566018):0.102128557):0.056851912):0.097880042):0.062574850):0.061386759,(c4542:0.343089212,(c3163:0.184872958,c3193:0.087873725):0.509574152):0.093455135):0.054113085,(c1224:0.439748265,(c391:0.454739710,((c4210:0.369568744,(c1094:0.355281021,(c1997:0.976136128,c2842:0.000000005):0.244947980):0.013641622):0.041878492,(c2800:0.314081655,c2726:0.138820099):0.065800845):0.090330287):0.162210376):0.203791178):0.046340805):0.065637830,(c1771:0.384265073,c3148:0.328223780):0.157211974):0.054620506):0.030747354,((c5976:0.426752547,c6002:0.594301752):0.049110292,c2760:0.397171752):0.151753008):0.043772311,(c4919:0.442178073,c5745:0.396651074):0.109000087):0.048143641,(c3476:0.413418291,((c3707:0.627441214,c420:0.529652432):0.075893101,(c732:0.501912049,(c5899:0.323209716,(c4055:0.254428893,(c288:0.743429422,c6263:0.315844384):0.180612862):0.153608022):0.200472472):0.036232868):0.060131790):0.088167986):0.022197825,(c2188:0.735077896,(((((c895:0.588610734,(c4394:0.507360488,c2192:0.083069176):0.094254699):0.095216679,((c4355:0.468221073,(c2245:0.299900440,c2841:0.441519798):0.054726911):0.068132301,(c1009:0.358936010,c6087:0.334095159):0.078955090):0.045225609):0.050161988,((((c1617:0.247174027,(c132:0.000000005,(c326:0.0,c327:0.0):0.000000005):0.092947523):0.113482880,c6308:0.625589307):0.063461445,c1280:0.617437203):0.029159874,(c4518:0.271005535,(((c150:0.226192258,((c3210:0.317769455,(c3041:0.125516597,(c3007:0.156006750,c3238:0.294983226):0.153736846):0.516717740):0.103395364,c324:0.162008650):0.056527662):0.043076306,(c1024:0.021594102,c3813:0.718779194):0.229845302):0.065192610,(c3552:0.296372549,(c2729:0.334521802,(c151:0.000000005,c6554:0.000000005):0.056427946):0.040339165):0.196721345):0.060700864):0.021924374):0.047519853):0.050397310,c5654:0.494936179):0.056378176,(((((c4114:0.313122240,(c4333:0.437643307,c4838:0.260083816):0.143961296):0.106219513,((c2621:0.340942694,c3410:0.408926808):0.167682628,(c4713:0.284636909,c4456:0.459163514):0.074764823):0.066827330):0.040206178,(c461:0.649997395,c934:0.383391988):0.175916336):0.029777787,((c3767:0.420710618,c2883:0.504250007):0.111964619,c6444:0.422932520):0.059334383):0.033462950,(c3223:0.333981525,(c706:0.647095782,c5800:0.339641804):0.320079630):0.325174633):0.036549629):0.058217717):0.080475437):0.050890637):0.032762698):0.049168469):0.085639714):0.056760340):0.086047252):0.101732010,((c2686:0.936580802,((c575:1.056266728,(c508:0.502616880,c2390:0.633318103):0.154570924):0.181651041,(c1457:0.863029759,(((c2830:0.784900712,c5478:0.634191285):0.165061095,c3492:1.072282760):0.020566946,c2483:0.606544323):0.356059723):0.127364172):0.158370343):0.170982208,((c3001:0.599000444,(c5325:0.766107482,c6035:1.099026715):0.312931380):0.090088959,(c771:0.756463371,(c1112:0.593132281,c1006:0.597181129):0.074231537):0.286199213):0.102024242):0.046263425):0.074970557):0.038051021):0.037344013,(((((c1586:1.341133994,c1376:0.630773105):0.123655677,((((c4380:0.490864994,(c1037:0.100243886,c5392:0.592235818):0.471129886):0.476690261,(c5981:1.083841546,(((c3708:0.352221827,c3505:0.518880552):0.113291554,(c2088:0.281225421,c5485:0.318236878):0.348511855):0.108255641,((((((c851:0.380262618,(((c4679:0.599834265,(c2858:0.389000271,c3598:0.473820011):0.109555428):0.074596352,((c4692:0.374602572,c4881:0.373071655):0.131462052,((c4017:0.365418938,(c778:0.454593102,c5722:0.346854815):0.221015841):0.078602575,(c2289:0.394033717,c5677:0.493257263):0.110542324):0.050982743):0.070194961):0.056526051,((c3038:0.392001835,((c4467:0.333116762,c5001:0.441341177):0.109868322,(c2106:0.431963219,c5544:0.405844885):0.128073350):0.109964122):0.051554053,c4705:0.520930650):0.261871091):0.100062125):0.312964117,(c3861:0.693082759,c4493:0.606521964):0.570376790):0.171604238,((c1543:0.874896237,(c492:0.425338004,((c1809:0.473320324,(c3958:0.090855969,c4005:0.133471985):0.324074426):0.086318392,((((c4592:0.052911469,c6042:0.211673157):0.518208259,((c2085:0.389575084,(c2089:0.273722744,c3955:0.466620722):0.104337670):0.069783384,c875:0.369360037):0.062785958):0.102458438,(c1910:0.554919107,c5010:0.484958121):0.065739816):0.085477953,(((c5139:0.429225612,(c1763:0.326400593,c5053:0.259835287):0.066142048):0.276909077,(c797:0.183917526,(c5150:0.0,c5151:0.0):0.155362772):0.452328391):0.099677307,c1963:0.568579720):0.006614044):0.134945877):0.120810187):0.296376580):0.147154384,((c590:1.033424484,c596:0.719573572):0.411474599,(c5512:0.888604663,(c5599:0.712085017,((c4367:0.330085110,c6011:0.271115005):0.143004191,(c4128:0.450910098,c4298:0.496504516):0.311202079):0.398574771):0.401774265):0.141546294):0.034069823):0.084493537):0.113242152,((c5684:0.733839641,(c5046:0.352448125,(c566:0.609826868,c5577:0.497639179):0.075963201):0.578706753):0.232067419,(c5761:0.523944179,c4572:0.659299797):0.089134732):0.275173803):0.035271435,((c2706:1.988150274,(c3434:0.505083134,(c945:0.231485426,(c4923:0.571162500,c1378:0.159855144):0.127476501):0.267945658):0.204770812):0.364300548,(c1072:0.661101702,c4136:1.036749242):0.284349843):0.232319440):0.052928973,c2452:0.924624980):0.156007386):0.110391406):0.155049034):0.058657035,(((c1363:0.567122215,(c6556:0.443658876,(((c477:0.570075476,(c1204:0.646406039,c5500:0.743754715):0.038561908):0.114832753,(c1347:0.352644491,(c4699:0.171681995,c2177:0.257624216):0.266696153):0.043447223):0.119603487,c4026:0.505234915):0.415881154):0.093605917):0.059179348,(((c3170:1.120387796,(c533:0.818415635,c5898:0.809843175):0.289669699):0.052608573,c2829:1.560000857):0.020558580,c679:0.774293060):0.124353311):0.073490001,(c2696:0.790287514,(c5689:0.475191379,c5994:0.348206254):0.162149888):0.112242334):0.082079242):0.040395448,(((((c3196:0.686144152,((c4735:0.917024563,(c2459:0.404458337,c2565:0.506656149):0.206277818):0.081337751,c397:0.356476712):0.120587170):0.122424924,c1003:0.600563485):0.000000005,(c244:0.746707251,(c55:0.287973403,c4002:0.398932755):0.353141503):0.142421658):0.039394541,(c4259:0.512221209,c3966:0.884516111):0.590944013):0.045687228,(c894:0.537081406,(c4334:0.976597789,(c1449:0.965891069,c2763:1.089983419):0.425117333):0.146557397):0.157204333):0.056208144):0.014394606):0.030984583,((((c3367:1.422291415,c4496:0.000000005):0.968442226,c2676:1.106782659):0.078085927,(((((((((c3187:0.491446442,c5729:0.438494475):0.456317857,((c5694:1.471661851,c2180:1.194366520):0.179743873,(c2759:0.333956761,c3051:1.453927813):0.304849525):0.239475702):0.119994531,(((((c2064:0.331081253,c2066:0.163076526):0.525955070,(c757:0.171701528,(c5717:1.977569880,c2116:0.109435306):0.148734102):0.369687697):0.471583425,(((c858:0.364252151,c2795:0.443938001):0.278061801,(c5676:0.283721421,c5894:1.422874898):0.603894740):0.429791072,(c552:1.355901411,c5260:0.761448598):0.621047778):0.460997552):0.170175247,((((c4184:0.900087170,(c174:1.073557199,c5612:1.008194142):0.246922320):0.120861740,((c1922:1.206394163,(c2143:0.665354227,c3980:1.039251019):0.421154511):0.112224490,(c1297:0.549791331,(c555:0.306980691,c1325:0.377409582):0.452405765):0.263935533):0.092474834):0.064539308,(((c3008:0.783818295,((c1939:0.018938396,c6302:0.049454825):0.408083959,((c5859:0.175184498,(c4482:0.000000005,(c3838:0.000000005,c4814:0.000000005):1.488193738):0.234246254):0.154803752,(c1375:0.363013198,(c1959:0.038517781,c2290:0.089132534):0.177383296):0.181546148):0.157265650):0.184035975):0.102763395,(c2327:1.033663244,c5148:0.743451007):0.228491254):0.058280216,(c3108:1.522232144,(c3324:0.197670702,(c5967:0.434194149,c2389:0.371726694):0.091405926):0.270086821):0.207606160):0.061078094):0.087218408,c1477:1.115330554):0.064354303):0.029725997,(((c5395:0.183001408,c5974:0.166774657):0.406383637,((((c5444:0.239968553,(c1322:0.119528096,c908:0.769013871):0.019514250):0.393025650,(c2175:0.224083359,c5620:0.309828178):0.908681912):0.212522413,(c2612:0.930628545,c3993:0.811546426):0.191025461):0.096099596,c548:0.531766795):0.062851533):0.126558114,(c1473:0.657654723,(((c1064:0.326256897,c4344:0.237406229):0.121589800,(((c1084:0.000000005,c2010:0.000000005):0.534820343,((c2034:0.392371383,c4795:0.053859622):0.120313011,((c1287:0.118895961,c6341:0.031340354):0.090570342,c2658:1.470684115):0.097421291):0.285922228):0.052656819,(c388:0.405707070,((c5605:0.493561174,c5888:0.164344447):0.044761955,(c2111:0.224091748,((((c1461:0.004001238,c1462:0.000000005):0.076545728,(c1460:0.068121239,c1463:0.154768613):0.034380787):0.258447320,(c468:0.000000009,c2582:0.991119304):0.191363678):0.020984555,(c1452:0.302538098,(c1421:0.130154021,c4027:0.271179681):0.110754174):0.106949998):0.016915136):0.096674362):0.055310166):0.117120971):0.033727033):0.026010277,(((((c3181:0.286193654,c3047:0.384949822):0.086368507,(c1192:0.401546049,c2035:0.256993802):0.075615114):0.125299701,((c3478:0.004231503,c5869:0.000000006):0.296755940,c5652:0.444121462):0.008384265):0.092586179,((((c4715:0.067677162,(c5366:0.008204832,c6322:0.000000005):0.059819746):0.182397134,(c954:0.081333084,c4858:0.133272043):0.535398300):0.089257195,(c1486:0.300761250,(c847:0.199052874,c1864:0.222685321):0.048761852):0.015717850):0.035522632,((c2834:0.203484559,c5397:0.215488880):0.032544357,(c5789:0.184421491,((((c439:0.153404243,c5871:0.210590906):0.063337080,(c1201:0.095904683,c4212:0.194082458):0.026559830):0.019875152,(c5433:0.150281239,(c3465:0.068776021,(c2008:0.000000005,c2613:0.000000005):0.038773934):0.025978722):0.214123814):0.027216324,(c394:0.0,c395:0.0):0.230807891):0.026018398):0.027074579):0.045339308):0.038425800):0.022370689,(c4878:0.183264497,((c713:0.151157447,c1350:0.408348590):0.054872907,((c697:0.142361622,c3596:0.295080940):0.062430883,c3358:0.281715753):0.066074535):0.022079538):0.099511783):0.038112452):0.060089981):0.060012555):0.246339373):0.044688230):0.098524788,(((c5184:0.727877228,c3290:0.296674022):0.128177812,c953:0.530685768):0.726429453,((c723:0.837544674,(c1126:0.484732706,c5052:0.594739292):0.370947022):0.271684563,((c1937:2.185719738,((c1383:1.522208284,c5776:1.140242959):0.571246361,c3996:1.039685864):0.191018748):0.111429744,c693:0.998997749):0.082871472):0.147844417):0.052638488):0.020887445,(((((((c3940:0.723254239,c4607:0.458775140):1.374607642,(c3355:0.743381691,c5912:0.767057293):0.557701713):0.363464466,(c3445:0.472991811,c5076:0.624382433):1.619207108):0.153769887,(((c3884:0.090827682,c5530:0.000000005):1.396532814,(c4591:0.331571015,(c980:0.349205795,c4416:0.446746629):0.224243544):0.814376323):0.329123687,(c89:0.389757665,c4396:0.451693762):0.593952608):0.116817247):0.119447621,c5198:0.884538298):0.130178944,(((c775:0.510327636,c6010:0.578704799):0.509214457,(c568:0.780054903,(c5838:2.044525095,c4304:0.801878972):0.270257301):0.172906448):0.098153990,(c5409:0.178065610,(c4631:0.885095469,(c5032:0.472584464,(c2117:0.348396190,c4557:0.643639827):0.213135723):0.212081270):0.100232859):0.227641497):0.382003450):0.126318603,(((((c1801:0.458973798,(c1402:0.376248766,c3691:0.668880092):0.118505470):1.120847414,c1437:1.198579281):0.164334871,((((c2316:0.315228457,c3189:0.632090802):0.821460383,(c3250:0.935237447,((c2996:0.252941729,c3414:0.742098174):0.341898221,c3430:0.417984849):0.742430361):0.155094715):0.160700920,(c696:0.820952488,(((c935:0.626248316,(c5979:0.424832243,((c2879:0.336708923,c2665:0.323481074):0.125949654,c1116:0.296005866):0.138895665):0.352604400):0.098029268,(c20:0.355130585,(c1819:0.239834617,((c6046:0.845710470,(c3481:0.351903679,c2645:0.529847078):0.079941535):0.081024120,(((c4242:0.095559958,(c2743:0.189681594,((c4491:0.000000005,c6620:0.000000005):0.092636803,(c4483:0.022934335,c4484:0.054584914):0.109779878):0.080330704):0.023106135):0.034223149,(c2644:0.140571394,c2896:0.116227107):0.140605673):0.055415405,c4859:0.348508645):0.029697481):0.061363894):0.102737777):0.120022064):0.146551349,(((((c3182:0.363733991,c5907:0.799838929):0.107117146,c4090:0.386081322):0.390715830,(c3916:0.277777068,(c1892:0.000000005,c5112:0.100970832):2.030345098):0.129220660):0.113499269,((c2049:0.430479182,(c1374:0.359123398,c6128:0.619580657):0.204036126):0.304659412,(((c3243:0.195883604,((c1729:0.120956643,(c2643:0.123102425,c2745:0.066494091):0.065581535):0.057902627,(c3002:0.107174719,c3190:0.139473409):0.050240201):0.038082433):0.226935218,(c2794:0.258853374,c3247:0.213190689):0.274777917):0.426550407,(((c2839:0.384680684,c4438:0.180553420):0.122343471,(c4232:0.449113860,c5506:0.218884198):0.134110508):0.055387560,(c2898:0.440002618,c6316:0.181215517):0.229418428):0.124418961):0.168006528):0.038891850):0.091581480,((((c2230:0.485991622,c4488:0.489686521):0.103025210,c59:0.386867269):0.115590548,(c846:0.261728484,(c3129:0.305040826,c2655:0.417382461):0.055178699):0.057094905):0.067763411,(c4464:0.489610941,c58:0.452228615):0.033942608):0.102760086):0.234783888):0.142713393):0.234089132):0.227257551,(((((c130:0.581904919,(c5277:1.793829365,c4383:0.788375820):0.447021253):1.138583167,(c2602:0.127217075,c6490:1.393689209):0.950665990):0.191176422,(c3356:0.988321413,((c3733:0.632106255,(c380:0.585138511,c2202:1.060144308):0.259696487):0.195477594,((c1730:1.607709712,c4270:0.514197942):0.621158013,c2096:0.909801080):0.117764729):0.304097363):0.097821959):0.185277788,c3824:1.326760408):0.021043933,((c6275:1.357199193,((c371:0.887783478,(c385:0.695082318,(c2158:0.345519833,c5011:0.233624736):0.557049222):0.297149204):0.292745501,c2050:1.371977706):0.068650118):0.086412918,((c1459:1.424445428,(c4586:0.556043362,c5731:0.932286598):0.498786528):0.355168321,(c2418:1.307978495,(c710:1.445125000,((c2741:0.296798261,c3862:0.385510939):0.977491089,(c1432:0.958531063,c6543:0.468444963):0.187826630):0.286320721):0.040900572):0.101754391):0.038114750):0.145752664):0.053332986):0.047090915):0.011593418,((((((((((((((c4296:0.892067981,(c1880:0.189537322,c4161:0.193807498):0.350564594):0.116566183,((((c5221:0.447410167,c5464:0.415624430):0.123339570,(c3081:0.272978916,c3346:1.052482484):0.202291731):0.119850798,(c1468:0.670143923,(((c5730:0.476408251,c5614:0.559800435):0.113319629,c2823:0.410183294):0.028084147,c2514:0.360595865):0.042503196):0.080110164):0.461672793,c2601:1.511661698):0.000000005):0.069500923,(((c4665:0.396941228,c4882:0.317081791):0.119142156,((c2616:0.334749303,(c2573:0.370846148,c4125:0.722559756):0.121655159):0.134500159,c1804:0.818899398):0.115628810):0.052635252,(c4529:0.268883237,c332:0.592847109):0.124578341):0.192897015):0.108067855,(((c2296:0.906328362,(c6575:1.156175108,(c2152:0.419224658,c6373:0.518641131):0.100171418):0.050019649):0.000000005,(c22:0.000000005,c1932:0.000000005):0.965801034):0.075376600,(((c2813:0.579172870,c4320:0.503655900):0.052547229,c1251:0.510604096):0.147196150,(c844:0.283660309,c4590:0.478940074):0.284670519):0.119073598):0.134200700):0.036815183,((c2782:0.406595587,c3672:0.288742942):0.329288691,((c5634:0.407717207,(c3682:0.416267011,(c961:0.350586064,c5408:0.363166729):0.096848803):0.127075218):0.126005129,((c5400:0.357595981,c5811:0.374465813):0.245104285,(c4611:0.236008439,c6367:0.752455333):0.124921724):0.072580509):0.574002081):0.188040756):0.105545447,(((c2493:0.601065587,((c4983:0.362461137,(c2788:0.384509773,c4937:0.346740147):0.185129350):0.093143991,c4832:0.441330550):0.074509677):0.236390060,(c241:0.623331985,(c1967:0.682857381,c2946:0.958204586):0.070401635):0.103314143):0.082371823,((((((c5119:0.372136188,(c1358:0.420644436,c5191:0.305469315):0.084193009):0.071019177,((((c3037:0.437331858,c438:0.365664771):0.064727311,(((c2773:1.797725457,c5214:0.215324439):0.220925755,c3514:0.327929386):0.069621253,c3374:0.388328895):0.059595240):0.096216658,(c4595:0.362477970,c6340:0.256475622):0.110669364):0.077778111,((c6291:0.472623766,(c5604:0.558113919,c1548:0.270815239):0.056322450):0.027066185,(c3360:0.457505234,c5234:0.415452381):0.244198492):0.053899424):0.072930208):0.200594514,((((((c995:0.455302734,(c666:0.434885243,c4737:0.444622767):0.058667545):0.102010873,((((c943:0.440376147,c969:0.526798445):0.056613185,((c524:0.474910627,(c670:0.421938301,c2705:0.489227829):0.219709260):0.129696636,(((c665:0.494458197,((c3783:0.359678951,c5591:0.401233978):0.084079365,(c845:0.595483154,c5957:0.483149974):0.205236416):0.065888247):0.079100727,(((c5893:0.550953888,c659:0.458249843):0.097063702,(c4933:0.333675048,((c2892:0.398724814,c681:0.313858431):0.040516387,c3333:0.344988423):0.063998206):0.057522126):0.013253564,(((c2708:0.331095372,c5986:0.508306709):0.074444852,(c224:0.319135368,c3411:0.385291731):0.096934931):0.022908049,((c4101:0.311149857,(c810:0.076649256,c3095:0.100683483):0.456886668):0.177275724,c5853:0.654818236):0.118629914):0.041047404):0.071112974):0.119125731,c2292:0.574491629):0.182091597):0.050775376):0.028887349,((c5383:0.553312795,(((c4597:0.198449599,c5596:0.544025989):0.183852360,c4787:0.499861122):0.113828323,c3898:0.572244381):0.111760103):0.060769438,((c776:0.452305241,(c4366:0.526117613,c4989:0.355339985):0.224553155):0.700910243,c986:0.679673338):0.181806876):0.082884895):0.108682797,c5401:0.693469329):0.128736332):0.077633299,c447:0.603756909):0.036004948,(c3784:0.405556398,c6593:0.681158586):0.075755927):0.066339078,(c3543:0.347840568,c3765:0.277083627):0.166382320):0.057118485,c649:0.384233390):0.058179478):0.069867143,((c734:0.263926804,c222:0.405921805):0.201090404,(((c2097:0.229980977,c5456:0.485820945):0.153040874,(c4556:0.367543030,(c1881:0.315600447,(c3106:0.523560905,c3402:0.092917562):0.179680616):0.232994123):0.125760629):0.094358893,(c2893:0.653529192,(c5015:0.703473459,(c2824:0.489435365,(c5518:0.418719094,(c586:0.327669318,c3440:0.081213650):0.170683294):0.040566840):0.109345082):0.232336470):0.090310302):0.061748786):0.046922381):0.029741070,(((c510:0.388895543,c2220:0.404206123):0.170249883,(((c4712:0.595408293,(c156:0.230410447,c3058:0.218977518):0.286396460):0.107526511,((((((((c1438:0.360411442,c2173:0.633743018):0.414481706,(c3978:0.482217066,c5861:0.258623290):0.189619774):0.071767396,((((((c5473:0.225966163,c425:0.434554270):0.093835028,(c16:0.464840923,c365:0.325421743):0.091474233):0.077854720,(((c4718:0.362248178,c87:0.477500319):0.053653346,c6501:0.349402805):0.108740634,(((c1190:0.794304872,c1169:0.348853034):0.055706928,c4494:0.362935885):0.066865598,(c3357:0.361845379,(c5725:0.153118907,(c737:0.154393144,c60:0.447162336):0.078237715):0.076274661):0.068018799):0.031602897):0.032420171):0.208181995,(c1312:0.562804384,c4335:0.446282912):0.163205742):0.089142737,((c3550:0.608898726,(((((c5232:0.463585606,c1030:0.420571475):0.104565470,c4069:0.304034076):0.072378883,c3523:0.430687316):0.082580078,(c852:0.610922257,c4206:0.381094592):0.102514499):0.298301843,c5999:0.362780836):0.084311958):0.083389037,(((((c1180:0.721736309,c1333:0.303019606):0.186539157,c5778:0.323409094):0.063063340,c819:0.487014685):0.103625142,c4805:0.706141249):0.130143257,((c3400:0.333432969,c4589:0.473479746):0.047819799,((c3659:0.280499458,c6370:0.351773622):0.068783330,(c4916:0.450289704,(c5663:0.339625841,(c3536:0.330229693,(c3719:0.234036884,c5440:0.531477795):0.089246251):0.083822554):0.116065837):0.114704305):0.115385021):0.042191455):0.035485614):0.073730859):0.027347406,c4990:0.492829321):0.079475253):0.073847137,((c798:0.479016524,c1025:0.324531238):0.267729696,c5005:0.383551921):0.040249762):0.056847840,(c1426:0.329262264,c4748:0.435185967):0.198619344):0.039516286,((c3833:0.450226468,c4641:0.196067396):0.193058014,c2632:0.447793033):0.126414869):0.106600305,((c829:0.498072711,(c471:0.450531623,(c2934:0.241178541,c3165:0.465625153):0.059682789):0.157166183):0.052880608,(c5190:0.876569764,((c794:0.348717143,c3826:0.394481514):0.140469088,(c1909:0.362433304,c4340:0.358497072):0.089452185):0.333558543):0.233259912):0.030249605):0.077128635,c5262:0.626023763):0.043250934):0.106376852,c2889:0.594277617):0.160846091):0.032170660,(c982:0.636950964,c5715:1.200000157):0.156605306):0.059688292):0.073012932,((c387:0.709144711,c4221:0.415864759):0.457985873,(c5793:0.420956277,(c1478:0.479077121,c6264:0.403002793):0.126658205):0.107819981):0.398868174):0.050403577):0.073720513):0.067639235,((((c1259:0.464126775,c3590:0.289237662):0.216187578,(c5333:0.308859665,c334:0.499675044):0.154906528):0.131816703,(c5416:0.362312673,(c348:0.123164834,c1183:0.252833556):0.390602268):0.170599110):0.492616458,(((c298:0.334928221,(c4354:0.817722156,c6413:0.244976428):0.127176602):0.064281593,c192:0.335416952):0.090018480,(c558:0.471816259,c2583:0.467601074):0.269927050):0.170584877):0.168936041):0.055167774,((((c5149:0.508054074,(c6092:0.404314439,(c2388:0.353405033,c4740:0.395416592):0.312855696):0.035991101):0.135479390,(c2872:0.543211880,c3585:0.392763183):0.177389261):0.245652238,((c3443:0.542036594,(c4594:0.531155861,(c968:0.375723846,c1318:0.251561187):0.124818104):0.293272326):0.669605618,((((c1310:0.534126465,((c2469:0.587953581,(c5743:0.488286908,(c4545:0.577348837,(c1122:0.323274843,c5253:0.235960459):0.121461870):0.239369899):0.169662851):0.038058962,(c1401:0.237757912,c3098:0.520759308):0.133576133):0.092894170):0.188985263,(c3424:0.391708282,(c628:0.489082998,c5088:0.450941685):0.120793969):0.109193681):0.298829598,((c2442:0.381781881,(((c489:0.590601921,c4126:0.694055512):0.087938982,c2537:0.373894132):0.133601456,(c4958:0.000000005,c5264:0.214293789):0.271163459):0.078259789):0.129209418,(((c3049:0.231968926,c4082:0.226612862):0.259382996,((c2836:0.365682368,c4685:0.427544038):0.066124412,((c3431:0.637391546,(c3342:0.447290576,(c1933:0.368165273,c2178:0.475204609):0.078452374):0.127442907):0.036274546,((c2964:0.475101363,c6468:0.389093948):0.117565031,(c2211:0.423445466,(c615:0.506140112,(c4104:0.096369427,c6287:0.139702434):0.253203157):0.129613947):0.128139528):0.032189052):0.091711911):0.022381654):0.035490779,(((c1903:0.331505800,((c178:0.395698353,c220:0.921703352):0.187247692,c5483:0.366720691):0.149323516):0.068243263,c978:0.532822287):0.090055416,c2576:0.606442658):0.061558258):0.062194289):0.212307895):0.080610288,(((c1142:1.037430979,c2142:0.434414915):0.095298833,c1314:0.394763067):0.136378769,(c1833:0.619003089,c1428:0.697818847):0.096951691):0.281126430):0.151530976):0.161228966):0.152232784,((c1167:1.318016841,(c509:0.654307516,c4564:0.000000005):1.357997643):0.359737460,((c1590:1.992698483,c4288:1.213536245):0.625266072,((c1496:0.372342221,c5573:0.514415924):0.079291633,(c5199:0.124740778,c2343:1.847841408):0.331315777):0.281572171):0.090538365):0.191471188):0.101612621):0.035507072,(c6410:1.148209665,(c1093:0.673731612,c2457:0.101507939):0.507411934):0.539686550):0.040162921,(((c5243:0.589580283,c4608:0.396731684):0.261802322,c3776:1.147657404):0.122687132,(((((c1293:0.599571722,(((((((c551:0.548535468,c3448:0.303412938):0.130736413,(c3382:0.382606914,c5695:0.504374305):0.082236472):0.035349536,c519:0.483400443):0.071835284,(c1489:0.415609575,((((c876:0.404905612,c4921:0.350727593):0.085471405,(c2441:0.396015539,c5222:0.512443731):0.107914319):0.067876347,((c4887:0.243497278,(c2196:0.361398017,c1491:0.398899723):0.128162168):0.188246322,c2069:0.397413457):0.069688837):0.059642435,(c3531:0.704258385,c3491:0.432390334):0.088719547):0.124750412):0.086776645):0.057336662,((((c1355:0.358222850,c5788:0.386512230):0.206127066,(c5238:0.341763723,c5281:0.601964166):0.086693709):0.113512307,(((((c625:0.240975849,(c4662:0.520819426,c5424:0.321319313):0.090980232):0.228892775,(c6673:0.331172831,((c486:0.0,c487:0.0):0.088251951,c530:0.097877287):0.128105849):0.066011953):0.074259309,c598:0.340063023):0.065856192,(c5093:0.375566953,(c4907:0.302728680,(c675:0.097459599,c3376:0.198765970):0.237908295):0.082279690):0.108433563):0.053080876,c4654:0.561844449):0.064716585):0.038394321,(c458:0.279776422,c1194:0.464924925):0.106837227):0.061109093):0.037278035,(c6129:0.483540594,(c5141:0.570742118,c5830:0.448474983):0.039704299):0.104178468):0.032062499,((c5411:0.321512558,c4324:0.436405342):0.094130689,((c3343:0.482189777,c4156:0.486573741):0.168826680,(c5651:0.354479044,(c4813:0.530175555,((c5132:0.527196129,(c5021:0.165438753,c5554:0.160920438):0.068736558):0.095724304,(c5168:0.672023815,c1330:0.472748663):0.062644292):0.313223999):0.255618136):0.098665348):0.064238566):0.048402654):0.030199057):0.032959823,(c4587:0.436264713,(c3390:0.351432911,(c526:0.325094160,(c1365:0.248482169,c4478:0.376329848):0.594637279):0.723071807):0.144391907):0.150269340):0.041768362,c2437:0.480570987):0.208483819,(((c2758:0.490192200,(c2450:0.458880003,(c1791:0.444065735,c4425:0.373068331):0.099084465):0.116147091):0.175853546,(((c1121:0.415471404,c1848:0.420780438):0.154331909,(c405:0.313335699,(c2067:0.359224138,c4053:0.415422956):0.166410644):0.076389800):0.181629034,(((c2811:0.650166566,(c3725:0.527350403,(c265:0.471665414,c2695:0.522381920):0.079446829):0.079521686):0.073506370,(c4143:0.677755986,(c5775:0.552491815,c925:0.501209289):0.105533281):0.082655858):0.059923212,(c4023:0.504312348,(c5274:0.403444367,(c1023:0.525499306,c2845:0.429127319):0.135034985):0.081826762):0.117152274):0.095947374):0.128472461):0.520488776,((c5193:1.102644580,((((c64:0.204547530,c2291:0.398996899):0.193130746,c936:0.551803188):0.114085501,(c2704:0.527728517,c4289:0.436623161):0.077926236):0.076941193,((c5514:0.345467476,c6570:0.445174148):0.106060135,c5220:0.372572277):0.066956598):0.262311119):0.131667986,((c1929:0.435371932,(c3458:0.483509761,c5140:0.532784501):0.034128619):0.422296906,(c2791:0.594238400,(c5231:0.852932692,c5669:0.432328052):0.237871581):0.455207047):0.294922954):0.083894672):0.038312474):0.045884883,(c4021:1.113045839,c5791:1.027973379):0.257563125):0.035313287):0.037655700):0.072612952,(((c1847:0.647388911,((c4647:0.407482340,c5090:0.382132839):0.322122874,(c4072:0.419971944,c4158:0.505681091):0.106346551):0.204129187):0.166164503,((c879:0.834444440,(c944:0.830405613,c3310:0.467981976):0.600649581):0.285870762,((c5037:1.061220791,(c3155:0.584858574,c3828:0.328266947):0.436801745):0.090805190,c5:0.671011107):0.096760945):0.186626985):0.081861670,(((c1947:0.644734907,(c1057:0.546722024,(((c1591:0.458323788,((c1405:0.348614500,c4290:0.371627194):0.099827285,c3778:0.423696743):0.037265856):0.008325631,(c1177:0.443175418,c5008:0.394214453):0.117978285):0.017907358,((((c2339:0.279900096,c1509:0.473303413):0.110925822,c3621:0.396431840):0.024236074,c1525:0.375910425):0.021146499,c2691:0.436943623):0.030101206):0.117912689):0.270804657):0.551206561,((c5108:0.592991111,(((c1150:0.060170465,c3624:0.006674165):0.439544651,(c3406:0.404267540,(c2786:0.552262634,c5122:0.396395292):0.124839517):0.156102327):0.116823750,(c4328:0.782658502,c4850:0.537988733):0.116816428):0.065836663):0.354802076,(c180:0.387102119,c4999:0.632505501):0.412152805):0.212208450):0.209945729,((((((((c6312:0.739593277,(c1422:0.673521430,c2953:0.865403073):0.117629057):0.071142913,c5441:0.802319940):0.104223414,((c1367:0.618008476,(c3857:0.404242165,(c4869:0.396511606,c3421:0.371265588):0.092786252):0.105033471):0.069808879,(c1253:0.402802210,c5313:0.557457598):0.209431803):0.208097864):0.068900052,(((c1170:0.553059773,(c4353:0.423884430,c4336:0.639831754):0.112957096):0.274773824,(c990:0.412524449,c1431:0.922812337):0.347866192):0.110628917,(((c2472:0.608022784,((c650:0.360009478,c3989:0.482455072):0.903112012,(c2414:0.729965787,(c4670:0.488848793,((c5099:0.431633971,(c1411:0.380727804,c2024:0.695923622):0.127120721):0.097782364,(c638:0.615145495,(c4582:0.406254516,(c4796:0.314622647,(c4421:0.789921871,(c3597:0.393568969,c3642:0.474221322):0.111888987):0.052413550):0.190632685):0.183071296):0.073174884):0.374907208):0.691160211):0.335055279):0.309133927):0.054343804,(((c2349:0.562700612,c2516:0.725366628):0.329031450,(c2003:0.600486602,(c3745:0.438709944,((c3746:0.428507823,(c3747:0.522233457,c3758:0.527432743):0.057396399):0.145356238,c3749:0.543300810):0.101899052):0.183731058):0.415143367):0.097974600,(c2866:0.820977019,c2908:0.943643452):0.230715010):0.079626810):0.075640768,((((c4102:0.592937016,c4052:0.724116385):0.245535022,((c1021:0.354029299,c6270:0.396980017):0.280282612,(c2420:1.096875964,c5863:0.641700394):0.378347927):0.136018600):0.129976393,(((c2535:0.423769560,((((c1712:0.314412624,c2547:0.469794800):0.193671222,(c2359:0.411772506,(c4219:0.471131232,c2496:0.410768295):0.070132256):0.066256611):0.058861823,((c2268:0.465365227,c2544:0.322176866):0.187743505,c2404:0.367454139):0.064464871):0.051608120,(c3113:0.358237725,(c1744:0.409224776,c3265:0.306264191):0.115813515):0.128014150):0.041436003):0.052125678,(c3069:0.384442296,(c2345:0.448041913,c3066:0.273964193):0.145682513):0.095193981):0.083135247,(((c2260:1.101240428,c2372:0.760399465):0.414832222,((((((c5425:0.411155733,c654:0.522758071):0.144222518,c2376:0.503616754):0.049608486,((c1731:0.809092771,((c3757:0.458139105,c3789:0.385625564):0.329717671,(c4293:0.534872772,(c2012:0.554817009,c5584:0.483599343):0.245218268):0.051989484):0.128696208):0.079510843,c2933:0.493729564):0.054722572):0.077719949,(c3792:0.289417500,c4329:0.534893954):0.122907960):0.047817695,((c1808:0.410383679,((c5031:0.425893172,c2257:0.482752272):0.044676101,(c3246:0.478235979,(c5767:0.417855776,c2504:0.534897645):0.114040728):0.283043474):0.086711236):0.208153441,((c2351:0.349272908,c3027:0.378631409):0.097541726,(c1945:0.330304731,c2332:0.551965695):0.123321468):0.143364311):0.083890035):0.033802742,((c2528:0.340611509,(c2338:0.459250287,c3035:0.297789845):0.203441717):0.076679141,(c2531:0.365385592,((c2280:0.341580250,c2299:0.419421365):0.150261163,(c1838:0.590482943,c2589:0.398773017):0.130493258):0.066634878):0.095802475):0.146334648):0.088137456):0.041864454,((c2484:0.745319624,c5080:0.299995853):0.255898851,(c4146:0.570571507,c5759:0.405460998):0.224628290):0.088876167):0.097794091):0.101776244):0.071820585,((((c5686:0.842714491,(c4854:0.431508760,(c1832:0.382691489,c2475:0.332189239):0.205462621):0.096933466):0.110064471,c2527:0.543347894):0.077399978,(((c2570:0.566015623,((c2949:0.511051622,c2405:0.325133746):0.127532541,c1844:0.414265570):0.086754969):0.016873085,(c5241:0.443167564,c4229:0.536530979):0.187659179):0.126124041,c6006:0.823024739):0.091371192):0.134362159,(((((c3270:0.506609020,((c2407:0.389687621,(c2526:0.707720236,c4374:0.350138167):0.100755696):0.067429659,((c129:1.261432662,c5744:0.304634847):0.222837526,c1566:0.362635147):0.086099589):0.041093747):0.129137130,((c2806:0.536771946,c5120:0.538943758):0.102744431,((c5987:0.530743987,(c2534:0.546665724,(c835:0.390915967,c1624:0.582691981):0.102156232):0.065477201):0.065620648,c2474:0.834923460):0.114528518):0.074302193):0.024396611,((c3025:0.454095706,(c232:0.282874693,(c1843:0.505897372,c3024:0.183388806):0.066115681):0.092117554):0.059859874,((c3030:0.169521402,c5142:2.143029838):0.302706677,(c213:0.341764752,c2670:0.451838837):0.043733907):0.119211663):0.120051724):0.112963942,((((c1746:0.502132024,(((c2317:0.507503558,(c2512:0.447495152,c2384:0.314708282):0.066200613):0.087816400,(c5989:0.372093124,c1613:0.603357261):0.114957000):0.096301850,((c2357:0.533470516,(c2549:0.427320018,c2563:0.284411947):0.063110043):0.086034480,(c1004:0.396121250,c2285:0.457351408):0.107989210):0.144066949):0.123500007):0.069553851,((((((((c1842:0.419784717,c1850:0.398810349):0.136910293,(c2930:0.531702456,c2306:0.458975924):0.105953705):0.096121208,(((c2419:0.483087872,c2555:0.511841823):0.134023711,c3278:0.744706972):0.304024182,c525:0.948153195):0.104963815):0.031333059,(c2487:0.396105589,c4531:0.463596537):0.250361407):0.058118215,(((c3042:0.409386325,c4330:0.412586601):0.104297135,(c6274:0.518784655,(c2902:0.365680232,c2302:0.833515735):0.081291020):0.025806818):0.089519861,c2542:0.480285626):0.070733934):0.232066061,((((c2355:0.400419288,(c2350:0.348347394,c3029:0.395656341):0.150416880):0.186420765,((c2967:0.427417679,c2440:0.392584987):0.074752917,(c3306:0.478016320,c2366:0.551964581):0.047687904):0.098241850):0.116011259,((c1440:0.296679609,c2258:0.249706869):0.204019601,(c3274:0.384633994,(c2368:0.613393853,c5489:0.408500881):0.118248209):0.038717533):0.150056144):0.024275283,(c605:0.314968824,c2301:0.361270211):0.300288916):0.044549154):0.136398871,(((c2354:0.636512388,(c1749:0.389541958,c4138:0.451282723):0.188381545):0.132801754,(c2979:0.487463188,c3366:0.495422471):0.393261152):0.045774643,((c2513:0.491807505,c5375:0.596774771):0.073157449,c2540:0.573502601):0.167901314):0.085363145):0.069681691,((c5437:0.651710559,c1753:0.600090019):0.318942663,(c3026:0.334375197,(c1282:0.469138655,(c2295:0.303124795,c2403:0.371997190):0.099522029):0.102871721):0.314796315):0.122162386):0.120569784):0.071111522,(((((c3917:0.533409572,c2416:0.626618977):0.109719893,(c1745:0.632481141,c3040:0.770361221):0.145926201):0.070215708,c5377:0.756953865):0.067720366,(((c1171:0.766066802,c4395:0.719056002):0.125938074,(c12:0.696101110,((c183:0.566985660,(c2473:0.304864889,c4302:0.561648793):0.134371479):0.299763428,(c687:0.427603232,c4000:0.467874822):0.084891112):0.097307969):0.055345741):0.067191350,c3253:0.598627368):0.099323556):0.090483036,((c2536:0.484382656,c4725:0.549671563):0.111756234,((c1748:0.457050933,c2287:0.477287204):0.101741539,(c2515:0.436395459,c4191:0.593195293):0.159890001):0.050542431):0.029607409):0.028023402):0.040457392,((((c822:0.602999457,c2250:0.182085036):0.133529335,(((c2297:0.292786464,c5754:0.355521986):0.065609962,(c4051:0.363986848,c2286:0.571792013):0.067136962):0.102280011,((c1535:0.364407013,c3279:0.320309075):0.126129225,(((c4068:0.336738670,c3794:0.380467879):0.090681278,(c4305:0.303487067,c4310:0.394199326):0.094380127):0.072343832,(((c3055:0.355687906,c5714:0.409041096):0.145564100,c5007:0.371535185):0.059401085,((c4684:0.283878735,(c306:0.589215319,c2682:0.219840439):0.516793992):0.210231182,c5626:0.210373437):0.219756661):0.045020250):0.063378097):0.093672488):0.037667520):0.061999636,((c4422:0.452445173,c3473:0.409386330):0.068018661,c1062:0.394903649):0.064786639):0.127550986,(c2562:0.420264859,(c683:1.183415945,c2506:0.347481468):0.138387863):0.159861120):0.086105341):0.016491646):0.042987470,(c3294:0.568344073,((((c1741:0.609285303,c2303:0.450840085):0.115832310,((c2239:0.745206145,c3292:0.523584061):0.210723077,c2940:0.398956647):0.071241539):0.056804388,((((((((c1219:0.497972769,c4820:0.353772987):0.111738586,(c4300:0.401018866,(c785:0.546081065,c4291:0.341503543):0.133131081):0.072637534):0.057413896,(c545:0.489771762,(c2352:0.492024328,c3065:0.401167622):0.110221421):0.053452497):0.027409538,(c1743:0.407956743,(c4563:0.571999234,(c2545:0.620951530,c3019:0.246851650):0.079816229):0.071244377):0.069910979):0.042920064,((c4503:0.622717300,c6276:0.647246955):0.187505362,((c2478:0.463655069,(c2412:0.383500717,(c2356:0.903609695,c3273:0.444792001):0.178395498):0.104388500):0.068081703,((c2149:0.411495785,c2185:0.456439073):0.189183577,(c743:0.360965490,(c4930:0.397802582,c5226:0.364572689):0.141988309):0.315570563):0.039557353):0.034156299):0.033560411):0.015107977,((((c1846:0.332336483,((c2259:0.318058630,(c2344:0.298967536,c2346:0.383239082):0.152592476):0.093227806,(c2947:0.475356976,((c1831:0.414145013,c2353:0.423229439):0.123806598,(c3023:0.367611598,(c2672:0.441910065,(c328:0.633552550,c3276:0.294176749):0.152226572):0.083549814):0.039115317):0.067565208):0.064759716):0.035930697):0.027389023,(c1935:0.305020956,c3674:0.405371444):0.086321287):0.033647410,((c2367:0.494150585,c655:0.657757909):0.131493149,(c1856:0.559079901,c557:0.364639097):0.109167997):0.126388426):0.044495909,((c2921:0.429001367,(c2520:0.297867497,c1762:0.462418347):0.125844842):0.087809470,(((c2312:0.422738031,c4127:0.242879560):0.112153410,((c2358:0.456087443,c3028:0.441675207):0.189318402,(c1750:0.270253685,c1845:0.434549941):0.163218568):0.082503991):0.018204292,(c4453:0.308196952,(c3206:0.355443232,c4431:0.308261870):0.136574926):0.057270528):0.053841686):0.053359395):0.021289955):0.046104890,((((c3166:0.440761527,(c2160:0.437554770,c2293:0.438532152):0.125878514):0.146735194,c3271:0.299340510):0.092626959,(c3016:0.652464568,c2361:0.373525981):0.107339143):0.097281932,((c1793:0.617768304,(c2348:0.630160986,c1747:0.357588486):0.098829889):0.079973025,(c2238:0.417782342,(((c1742:0.386458063,c2439:0.358973475):0.059981617,c2176:0.473575461):0.031473314,(c541:0.499525099,c1760:0.553969203):0.141070691):0.031206104):0.031080604):0.023078168):0.013805094):0.027957318,(((c2501:0.521218435,c3017:0.430019799):0.169678134,((c2757:0.430131569,c2326:0.417737596):0.091057348,(((c2334:0.368368756,c2360:0.316835179):0.050569361,c3021:0.329465373):0.087956507,(((c1373:0.263586542,c2948:0.404587147):0.094390479,(c3031:0.440672819,c3067:0.430744206):0.098579405):0.093451032,(c1982:0.284377910,c3022:0.427979120):0.114540590):0.107869996):0.026892383):0.125423040):0.067429920,(c6524:0.640581253,((c2385:0.540802606,c5567:0.407279687):0.125117055,(c2675:0.305698849,c3973:0.585315997):0.163169045):0.053174767):0.135484477):0.040127999):0.012222296):0.048797474,((c3389:0.783051727,(((c2413:0.543485016,((((c3009:0.357397203,c2375:0.658016881):0.091087810,c2288:0.438513251):0.115478979,((c2409:0.429439843,c2539:0.425322633):0.138082004,(c2541:0.358536959,(c1589:0.594102779,c2561:0.304258448):0.243404748):0.126516087):0.086854284):0.245781327,(c2518:0.497559266,c634:0.798887943):0.078151482):0.061184790):0.276175360,(((((c6277:0.796089583,(c2305:0.770100642,(c5873:0.683408636,(c809:0.394359084,c3168:0.409769858):0.121148881):0.091386157):0.243395782):0.142090401,(((c5501:0.591222718,(c3073:0.538416962,((((c2221:0.121373958,c4821:0.000000005):0.509153817,c5439:0.359707718):0.070219795,c582:0.503986411):0.101764937,(c3806:0.420445199,c3795:0.358464548):0.081956411):0.071021980):0.148700311):0.068932830,((c2335:0.472225571,(c3192:0.542657787,c3309:0.803814235):0.118792151):0.108199144,(c2444:0.721081407,(c2479:0.325829535,c3120:0.532873379):0.110835977):0.101221312):0.213382642):0.232895745,(c3308:0.655622080,(c5421:0.233142198,c5442:0.487609326):0.315712120):0.137985604):0.196772528):0.101251692,c2517:0.564088085):0.110254353,c3595:0.787292325):0.087435559,c2529:0.646251739):0.076156915):0.110577565,(c2321:0.457513507,c2298:0.568809908):0.222052040):0.077664572):0.000726809,(((c2322:0.533014195,(c2275:0.644516634,c1067:0.427280472):0.124418511):0.085113780,((c2383:0.309705935,(c2362:0.267898729,c2406:0.385955330):0.093908390):0.232485806,((c1820:0.411567150,(c3254:0.447155619,c1719:0.445786059):0.124462709):0.070174217,(c3741:0.526182106,(c2486:0.355626502,c6346:0.351400886):0.072820949):0.130097594):0.033823177):0.087413839):0.030924880,((c5878:0.527357575,(c403:0.598776177,c3777:0.386272265):0.090835343):0.219865830,(c5511:0.553299762,(c3844:0.457296585,c4280:0.397221623):0.139843925):0.302024483):0.061162070):0.015642449):0.035715530):0.033331685):0.027409514):0.043284328):0.037414011):0.074178931):0.050671643):0.029344805):0.016555968,((((c1774:0.419680824,c4172:0.486594659):0.271682720,(c2138:0.724328814,c5435:0.620423901):0.346245332):0.186785354,c2962:0.813254919):0.098482425,(((c4261:0.715647554,c5235:0.832910275):0.578588629,c2989:0.748603728):0.083747382,c805:1.000649598):0.049895616):0.084838181):0.020851938,(c814:0.515747640,(c198:0.409126163,c3386:0.395256578):0.124425180):0.774890037):0.038634854,(((c3034:1.723726027,((c2331:1.296861887,(c2637:0.369935046,c5741:0.375113206):0.261419815):0.237547399,((((c1740:0.459693295,c2374:0.367378794):0.223526273,(c2271:0.393781497,c3760:0.680228650):0.125057437):0.271763281,(c3032:0.422556906,c5128:0.534486213):0.430041669):0.136250039,(c2410:1.008227690,(c3255:0.644951803,c5921:0.532434965):0.195843497):0.170910125):0.127274184):0.132248527):0.000000005,((((c3359:0.113639380,c5228:1.552947139):1.015934374,(c3752:0.814927014,(c2225:0.494616878,c3186:0.646770352):0.485056913):0.318581073):0.060689146,(c498:0.510293870,c2623:0.517153145):0.455370555):0.136844220,(c3018:1.077944361,c4598:0.929888411):0.110900269):0.094529457):0.044052170,(c2492:1.106451906,(c4490:0.541639805,(c2805:0.461503543,c5022:0.324274039):0.465077216):0.158483512):0.184206868):0.124098522):0.065486278,((c1306:0.819928656,(c5498:0.619295039,((c1529:0.000000005,c6362:1.702047898):0.303018022,(c4975:0.448419444,(c2027:0.593674352,c4256:0.331980875):0.068324118):0.090546936):0.134323244):0.125166337):0.374469295,((c5635:0.531275661,(c2424:0.397164470,(c816:0.387507991,c3020:0.598762726):0.048720617):0.094771022):0.232887079,((c2315:0.431026230,c3277:0.381743882):0.119099347,c2379:0.542962945):0.200147622):0.181128435):0.100955464):0.064512075):0.045838151):0.034749420):0.068144260,(((((c2216:0.535618134,(c535:0.505215366,c2936:0.371621409):0.143927974):0.558829819,(c5289:0.539942824,(c1805:0.335880772,(c588:0.459088237,c2586:0.759706097):0.077589297):0.269897131):0.693143798):0.349601306,((c4584:0.397542307,c5358:1.157299928):0.961381685,(((c5798:0.525516766,(c4596:0.389689598,c5275:0.723069260):0.080381665):0.135271864,((c1626:0.631804458,(c4847:0.445957119,c5736:0.383645449):0.148772724):0.295236458,c5211:1.279166319):0.104288429):0.303569991,((c1039:0.368144239,c5996:0.311492262):0.121593313,((c3836:0.294809898,c3837:0.485786213):0.171724499,(c2124:0.246035950,((c1281:1.255181856,c4760:0.773093146):0.094934382,c6615:0.350172998):0.122071546):0.275234891):0.247227486):0.164315178):0.201894881):0.305969243):0.143373139,((c2955:0.662839918,c5467:0.586913916):0.417262961,(((c3774:0.299043171,(c5685:0.376213454,(c2521:0.443182513,c5522:0.469633694):0.046251093):0.110124582):0.267185192,(c5347:0.466345323,c2617:0.706645699):0.252637639):0.178697373,(c804:0.462405657,c2029:0.000000005):0.977683066):0.165654546):0.071184423):0.189338304,(((((c4618:0.635297815,c5550:0.588924014):0.256289516,(((c2945:0.470356698,c4537:0.396361724):0.128738902,(c5928:0.462346155,((c1643:0.446607637,c1467:0.742444133):0.170571099,(c3669:0.460397830,c1197:0.526879979):0.089667767):0.036576303):0.076265867):0.059302544,(c4559:0.677400864,(c3551:0.563638160,(c3513:0.397711739,c5282:0.314753955):0.183465692):0.226166434):0.146248497):0.058391158):0.058861636,(c6284:1.293576883,(c1464:1.250767351,c1552:0.587375676):0.137882604):0.067138189):0.183439165,(c4816:0.808444889,(((c2603:0.521794656,c5960:0.471749047):0.239405466,c1120:0.520681069):0.100953091,c155:0.395128854):0.225988148):0.418096854):0.069444140,((c5376:1.554688664,(c1147:0.917244425,(c1782:0.263103905,c5163:0.542229420):0.594865351):0.188872106):0.507411177,(((c5318:0.892313320,(c2157:0.582291601,c5363:0.608494501):0.225012297):0.092643566,(c4835:0.797271900,((c2630:0.468961397,c5466:0.523904367):0.216982506,(c3000:0.688762508,(c2609:0.717198692,c3791:0.581411735):0.136964495):0.207652480):0.133908625):0.093846811):0.115153312,(c5637:0.659279281,c5779:0.797156389):0.547777529):0.198912319):0.075312676):0.149377313):0.044155949):0.062379944,((c1444:0.804764293,(c432:0.520781700,(c494:0.560878681,(c874:0.495340990,c5268:0.451706138):0.160802235):0.054606617):0.580250672):0.249618874,(c3425:0.672083268,(c2571:0.492442665,(c5519:0.412006477,(c663:0.466253093,c2822:0.522773943):0.127718725):0.158880075):0.386462583):0.489569319):0.159080316):0.057976498,((((((((c3379:0.460372277,c3808:0.665417330):0.272496229,(((c1610:0.298526999,c4664:0.520897585):0.275586109,(c502:0.488872988,c5531:0.788649432):0.175998344):0.096454867,((c538:0.357326420,c3742:0.407478546):0.544592272,(c4209:0.691448972,(c800:0.263404740,c3006:0.223014717):0.278658198):0.772471350):0.326854028):0.288100197):0.030510728,((c3911:0.813707512,(c2814:0.371116869,c3337:0.500765240):0.333730555):0.195542808,((c1855:0.650692156,(((c3352:0.306227700,c4917:0.225724927):0.572671865,c3125:0.890360460):0.083600486,(c4123:0.569668363,c5457:0.406669015):0.197613546):0.058214632):0.105912153,((c1182:1.135520141,((((c1362:0.529579180,(c3613:0.328110386,c4773:0.324781313):0.140338403):0.261906028,c4140:0.720929492):0.041775957,(c4381:0.439691641,(c3732:0.416148128,(c4284:0.390025116,c5033:0.150683763):0.291422651):0.260670803):0.129137944):0.133642647,(((((c673:0.437084532,(c576:0.558488609,c5527:0.430836549):0.171939689):0.122438343,(((c3751:0.282086367,c4910:0.479650221):0.102461271,(c1778:0.255733728,c4785:0.121217680):0.199835972):0.089182665,c1102:0.424497454):0.101652360):0.039916497,(c4950:0.742677236,c2619:0.533217055):0.085589741):0.081818450,((c1262:0.587869810,((c1055:0.444010417,c2778:0.473571571):0.064108055,((c5360:0.442890485,c3588:0.468009285):0.104450101,((c5297:0.334049993,c3820:0.561439603):0.087555046,(c2264:0.109101413,c5242:0.064576310):0.176977089):0.078887356):0.249974577):0.082467005):0.052215349,((c3702:0.347102081,c5167:0.424479780):0.130200646,(c4900:0.504667352,(c2243:0.513938034,(c4118:0.408338655,c6271:0.000000005):0.392610998):0.117117237):0.248003764):0.075110306):0.099463928):0.065071398,(c460:0.456518199,c3452:0.391051650):0.168040694):0.114380275):0.266527830):0.198525762,(c373:0.712703942,c4579:0.531686900):0.176560085):0.039465216):0.346026043):0.079233588):0.060105779,(((c3555:0.809205489,c6007:0.679206786):0.175324449,((((c694:0.443413136,c3714:0.474065278):0.288800880,(((c4339:0.419850634,(c1111:0.521155685,c5471:0.504067125):0.116660069):0.085905163,((c3586:1.504580533,c399:0.382566342):0.134909105,(c2021:0.518951055,(c1925:0.290348519,(((c67:0.607390911,c1148:0.000000005):0.043532530,c6072:0.147708521):0.375611585,c1619:0.274577323):0.110283941):0.137937374):0.144451582):0.050698884):0.056111618,(c981:0.378315217,c2785:0.491836512):0.298560100):0.059170666):0.062273549,((c1557:0.906997012,((((((c357:0.341355064,c5832:0.516005439):0.141069187,c5074:0.660084113):0.072067320,((c5787:0.550977616,(c2709:0.382778040,c5665:0.463183359):0.150083991):0.081978895,(c989:0.513298255,((((c999:0.195521109,c1254:0.143038683):0.058339189,(c5117:0.228054232,c4018:0.366680680):0.072489541):0.070053962,c1787:0.287342914):0.069532342,c6080:0.354773729):0.163030094):0.234641779):0.054185831):0.095881054,c4130:0.432520321):0.066938151,(c5170:0.774203194,((c27:0.340238933,((c3432:0.603476578,c3995:0.183021931):0.108860194,c1985:0.549129335):0.025197762):0.273085759,(c4646:0.494938030,(c1978:0.336727527,c2848:0.314749673):0.152169012):0.130585573):0.047930347):0.152402955):0.166270884,(((((c2146:0.388713416,((c939:0.448515696,c5012:0.619684522):0.097934604,(c2808:0.371182374,((c5324:0.563250556,c5549:0.310021842):0.144553564,c4992:0.519168588):0.085681680):0.123855067):0.123136945):0.177662929,(c1479:0.356831172,c2821:0.285353993):0.288449093):0.146647726,c1157:0.592925079):0.086938052,((c3344:0.587470690,c5946:0.359434224):0.114890690,c2141:0.339383959):0.092186847):0.082552432,(c1987:0.204996575,c5786:0.551822069):0.180271022):0.162669254):0.144980472):0.132493056,(c2862:0.492308306,(c5721:0.000000005,c6403:0.000000005):0.432919943):0.320436029):0.050454251):0.053939996,(c3975:1.359321088,((c252:0.000000005,c1103:0.000000016):0.925391525,(c4397:0.000000005,c6075:0.730096739):1.355189974):0.228851081):0.188115404):0.061368512):0.049488419,((c1998:0.552677817,(c4680:0.406404678,c5180:0.298260233):0.131145574):0.210019374,(((((c821:0.861569777,c2810:0.375088463):0.140125189,c4199:0.459748781):0.106360338,(c2720:0.479876606,c1305:0.633690151):0.097054313):0.068582290,(c4659:0.507600153,((c4863:1.212949142,c5574:0.000000006):0.582914420,(c1949:0.422842726,c2037:0.383718300):0.149809634):0.150728100):0.103856586):0.038323255,((c4214:1.257639992,c5189:0.721972029):0.494410597,((c4772:0.525225521,c4894:0.360467789):0.182119598,(c4012:1.076658485,(c5452:0.383298745,c4831:0.405761924):0.082876809):0.146925354):0.078956439):0.058413451):0.027702512):0.085493902):0.063608525):0.072539563,(((((c1352:0.737909589,((c523:0.253492708,c3117:0.392782826):0.070470446,(c52:0.258947457,c5642:0.561882616):0.067960532):0.035531810):0.084959550,((c436:0.557531029,(c2329:0.401227292,c5735:0.330464226):0.067947338):0.117498421,((((c789:0.397340931,c1140:0.363264030):0.216354472,(c5388:0.450862165,(c5293:0.355433501,c5958:0.306696799):0.091420333):0.067653345):0.058181867,c4239:0.415577314):0.064565078,(((c6603:0.485120664,(c1154:0.581718980,c1516:0.295123886):0.070468982):0.040710738,(c1754:0.548052250,(c4643:0.319603350,c3184:0.594822029):0.094994430):0.290886518):0.058361610,(((c122:0.336673109,(c68:0.000000005,c4061:1.091488914):0.470556274):0.072039939,c6161:0.312781315):0.075521708,((c2702:0.392052339,c2984:0.351794405):0.157710823,(c4974:0.370285217,(c1416:0.430099082,(c1721:0.236833070,c4770:0.213031140):0.122040141):0.293530999):0.098730909):0.130233184):0.044526370):0.103040219):0.094517237):0.063166078):0.084648375,(c2966:0.333025612,(c3729:0.395249610,c5420:0.311510174):0.151643496):0.237189581):0.588646539,(c1465:0.580661678,c2081:0.372532026):0.686105035):0.075681713,((c4124:0.542037225,(c4988:0.506651968,(c5174:0.600793703,c5484:0.296246619):0.067111682):0.116867751):0.195222287,((c3570:0.477426049,c5602:0.410816957):0.612463620,(c1930:0.684546440,(c375:0.620718481,((((((c3773:0.299229996,c2395:0.650862553):0.101797095,(c2951:0.508985593,c1128:0.545581538):0.150174652):0.054112890,c853:0.430347663):0.078526981,(c1863:0.574147065,(c5102:0.299730866,(c3639:0.459638931,(c3549:0.468710229,c5183:0.541489293):0.108389937):0.055673624):0.089788593):0.049754658):0.066426731,c4690:0.498681770):0.073845387,(c3503:0.302711772,c4920:0.554463078):0.268905556):0.095606083):0.080264555):0.032230991):0.079663388):0.158750746):0.081129745):0.069747358,(c4276:0.697193105,(c4391:0.578854555,c5980:0.309121829):0.239022805):0.355477083):0.137329343,((((c2983:0.000000005,c3439:1.171572590):0.475305112,(c624:0.442031233,c4696:0.732540051):0.349339043):0.249681051,(c2109:1.196750380,(c1061:0.153719232,(c5316:0.092161659,c2248:0.000000005):0.000000006):0.710366006):0.665879263):0.050171654,(((c2347:0.653919122,(c2063:1.120920170,c1758:0.744001218):0.074447346):0.564642188,(((c1555:1.257978932,((c393:0.527252956,((c1417:0.189166398,(c1556:0.270782445,c1279:0.239596758):0.040720692):0.082582315,(c1531:0.242147355,c5837:0.198332625):0.034522850):0.271682281):0.842359020,(c3986:0.501771322,(c2224:0.454883719,c2026:0.160896913):0.182190302):0.358140383):0.581403356):0.336296014,(((c4479:1.320577653,(c791:0.512922909,(c3153:2.050637878,c1777:0.759960236):0.239181446):0.400663579):0.154994715,(c4640:0.693299791,c5422:0.428076569):0.428487509):0.384645920,(c534:0.716724530,(c3939:0.503625533,(c5852:0.857507636,c6085:0.293197144):0.408666781):1.029020452):0.099950184):0.154944438):0.113960368,((((c900:0.415112299,c4653:0.523731947):0.198084163,((c4521:0.466420236,c5326:0.526590455):0.188303097,(((c915:0.568055038,(c5947:0.194397578,c5948:0.132499247):0.358573839):0.277485864,c3442:0.460843445):0.074446078,(c2253:0.468561894,(c1822:0.302188117,c3477:0.286326691):0.296408294):0.169113460):0.069238345):0.084778933):0.386474248,((c2162:0.681482255,c5118:0.392548593):0.181908045,(c5997:0.686056191,((c6402:0.346538957,c2172:0.213631750):0.345186259,c1353:0.274053696):0.337922532):0.089330745):0.332250583):0.095285352,(c1238:1.324538633,(c28:0.607059913,(c1527:0.588681900,c1861:0.260448701):0.375359212):0.832994904):0.155346882):0.081971605):0.076354147):0.000000005,(c5828:1.862813282,(c1794:0.959411140,(c2777:0.464389441,c2784:0.269641413):0.779533736):0.387699928):0.217520677):0.012032144):0.027610875):0.110139734,((((((c2370:0.743360752,(c1889:0.430756422,(c4775:0.487046177,c5100:0.430563926):0.272342365):0.335172423):0.159266245,((((((((c2713:0.729305645,c3606:0.526470808):0.219348186,(c1924:0.858876722,(((((c802:0.460994473,c1519:0.414232202):0.160839061,(c1936:0.472951683,(c2006:0.515238333,(c123:0.013122248,c1359:0.000000005):0.480221385):0.340663651):0.077712063):0.030910758,(c5418:0.601732027,c3175:0.567266681):0.151438662):0.042309454,((c833:0.548230591,(c127:0.477545405,c3266:0.354078025):0.092435623):0.082187424,(c3403:0.493971484,c5845:0.376586513):0.120336534):0.057373714):0.046182668,c2454:0.483701035):0.083550195):0.178700030):0.068238728,(c2336:0.655772792,(((c3453:0.431911960,c5589:0.365622345):0.115096041,c2212:0.504438107):0.068802601,c5372:0.722190434):0.167614115):0.094294370):0.035794869,((c2333:0.593464800,((((c4704:0.653607495,(c207:0.344119006,c4517:0.441783145):0.214301998):0.110583401,c3134:0.614438014):0.068396125,c4216:0.527224801):0.130882725,(c2310:0.644623845,(c1993:0.773182036,c4995:0.718363853):0.156008117):0.073393137):0.077250066):0.101407242,(((((c4269:0.437622353,(c1105:0.662508478,c5810:0.483271279):0.136980510):0.122343092,c5082:0.465798754):0.159344892,((c5547:0.457846621,(c2781:0.450490213,c5177:0.493145141):0.238664002):0.031779605,((c2891:0.609327720,((c417:0.449537561,c640:0.296250342):0.528464274,(c3446:0.676792038,(c2139:0.422861846,(c2697:0.534011452,c3415:0.460662112):0.076908653):0.168276210):0.169807450):0.225536056):0.133874142,(((c5488:0.602880740,(c3696:0.285844547,c3466:0.752118038):0.038507141):0.160303610,(((c128:0.000000005,c473:0.000000005):0.619585785,(((c1307:0.322120033,c5796:0.393375150):0.053294649,(c839:0.397512837,c3541:0.309263124):0.143735394):0.107633868,((c1533:0.421358367,c3257:0.260504612):0.210900775,(c3715:0.366157039,c2995:0.491888993):0.088326543):0.125174995):0.031855308):0.043710096,c4994:0.718947018):0.033468573):0.076063352,(c2543:0.476556572,(c4544:0.374235623,c4661:0.453045914):0.381786000):0.071713218):0.052393715):0.050685967):0.074822349):0.051227990,((c1553:0.917770079,c4728:0.580276255):0.162580369,((c1236:0.661122546,c6131:0.993855806):0.092890753,(c3909:1.475727595,c1175:0.501177975):0.141259901):0.096980484):0.083699359):0.036266770,((((c1824:0.422918126,c5802:0.501529038):0.057995191,c4399:1.165533573):0.064395475,(c2590:0.591947938,((((c3285:0.485816700,c4842:0.465970388):0.098759044,(c2378:0.499364945,(c2371:0.576757774,c5434:0.408757688):0.197052428):0.055331248):0.059485288,(c2127:0.580739363,c2341:0.498100472):0.156563722):0.020958774,(c407:0.385427165,c2618:1.111744124):0.211064346):0.073740168):0.092622703):0.041711375,(c4583:0.587265207,(((c2294:0.445075605,(c621:0.412532772,(c4686:0.502471092,(c2373:0.645827409,c5402:0.602005315):0.387832186):0.238376902):0.059615054):0.040992872,c2411:0.553479635):0.087115694,(c2115:0.393880901,c2387:0.462188021):0.173054125):0.019083892):0.086031111):0.049954706):0.050938767):0.023219130):0.031633694,c6347:0.544375850):0.059976152,((c2171:0.667263950,(c4905:1.172881674,c5024:0.543937454):0.387027445):0.209132750,(((c2783:0.418989766,c4499:0.399713322):0.190234767,((c5541:0.371947863,c5704:0.578969123):0.539450085,(c3560:0.443480106,(c1261:0.050598683,c3892:0.480747934):0.590837885):0.135978642):0.036047046):0.261906607,(((c4836:0.870795402,c4909:0.726010389):0.202535631,(c2703:0.551921754,c5525:0.906864180):0.242941042):0.492118220,(((c3721:0.632184629,(c2662:0.400609980,c3557:0.369085157):0.105980014):0.075598244,((c5350:0.557528257,(((c2776:0.892996443,c4701:0.199498067):0.164315633,((c725:0.416295869,(c2660:0.409320232,c5769:0.484884646):0.066689509):0.079566746,((c2449:0.686419325,c4913:0.790604504):0.210216936,((c1765:0.659780549,c3498:0.747271434):0.188664279,c4306:0.404541753):0.035638475):0.130164587):0.089354905):0.042532461,(c2819:0.380386781,c4409:0.537100545):0.151270731):0.100259982):0.066043800,(c221:0.284432771,c5000:0.376918822):0.113849930):0.044369640):0.380755358,(c702:0.511473597,(c5705:0.398928151,(c4413:0.551937665,((c3336:0.253326020,c3617:0.274595972):0.156257343,(c2894:0.386686121,c5777:0.422834079):0.089272483):0.092742753):0.087001692):0.079982389):0.149594514):0.150267396):0.166337773):0.064834887):0.085371560):0.044270056,((((c3781:0.388494625,(c1579:0.412219808,(c5179:0.269197826,c3750:0.400573935):0.068116767):0.095118387):0.144302524,((((c1313:0.498228729,(c1559:0.373397713,(c6480:0.460358468,c573:0.367943057):0.057770096):0.131021699):0.160357893,(c899:0.729309939,c1284:1.003218307):0.124051396):0.107321884,((((c735:0.796832289,c946:0.445180396):0.605031033,(((c1223:0.939483528,c1802:0.790749875):0.106522742,(c2263:1.123798451,c3526:0.736880900):0.609126249):0.178458648,c6057:1.378666528):0.388352922):0.124932091,(c1733:0.669411463,(c543:0.428903528,c2923:0.592909494):0.509743918):0.232136331):0.204289839,((c5152:0.240394148,c5995:0.293273645):0.441207069,((c764:0.360005044,c1878:0.409932737):0.335320946,(c1429:0.411784477,c1968:0.366331475):0.086293822):0.141805200):0.107146677):0.022797037):0.069867008,((((c1130:0.416221083,(c3062:0.446884426,c5755:0.328195549):0.230305031):0.105093317,c2036:0.671851709):0.106134809,((((c3297:0.400158039,((c5683:0.314917963,c5920:0.332877720):0.175914284,((c3668:0.387884615,c5162:0.304442807):0.270207909,(((c1521:0.401079032,(c3807:0.600082149,c5217:0.339260354):0.096676310):0.062531805,(((c1232:0.362680872,(c4927:0.486051224,c1292:0.595582454):0.093272450):0.067943843,(((c5219:0.287060067,(c5353:0.381130275,c3482:0.538746940):0.066301302):0.099309933,(c433:0.285396698,((c740:0.360237523,c5757:0.306062334):0.036624917,(c1342:0.278605460,c474:0.345150690):0.081930086):0.046214346):0.026757046):0.027617427,(c843:0.409759246,c963:0.312263833):0.077829176):0.085596389):0.069734941,(c865:0.400647830,c5143:0.428992269):0.104042654):0.111214074):0.072149623,(c970:0.479992052,(c408:0.402004801,c5919:0.583288598):0.123643160):0.096144930):0.072687578):0.049248129):0.130619527):0.052027496,(((c1288:0.340761320,(c1841:0.332526830,(c2463:0.338936074,c5367:0.334142737):0.091887504):0.059730239):0.064737991,((c5877:0.785048087,c5713:0.298441855):0.065750222,c890:0.293033070):0.085009729):0.124947592,c868:0.444532375):0.068800283):0.032448554,(c4971:0.498010719,(c554:0.443638442,(c1278:0.319238190,(c716:0.447743105,c3405:0.197804486):0.173731101):0.130323323):0.053576276):0.045666665):0.025089381,c646:0.318126171):0.099875577):0.072057468,(c4812:0.937749325,((c3516:0.506545081,(c1189:0.517279455,c5205:0.294716545):0.305944328):0.742506943,(c591:0.929594996,(c5448:0.450813986,(c5265:0.644019425,(c3927:0.307065490,(c2181:0.263901254,(c6258:0.295921953,c3568:0.363664942):0.070253840):0.180527335):0.076412353):0.092833899):0.204925903):0.158094741):0.258153233):0.113704105):0.101921206):0.059228076):0.055721290,(((c5171:0.439546092,(((c1123:0.423475322,(((c3413:0.898706746,c3202:0.686163532):0.142986589,(c390:0.187819395,c4899:0.567045206):0.085401251):0.088947601,(c4513:0.263482186,c4964:0.329980134):0.078823371):0.053892927):0.063457792,(c3460:0.242531837,c5742:0.495001546):0.146902157):0.097038347,(c1568:0.375507702,c6458:0.440511999):0.224033999):0.134550202):0.085600202,((c90:0.324157486,(((c3969:0.375775823,c1241:0.408577735):0.121289832,(c4382:0.445306230,(c3914:0.463088124,(c3164:0.257632145,c4281:0.791947302):0.082617068):0.119499044):0.068974405):0.026645556,c465:0.393643925):0.058070515):0.037960770,c1294:0.313029628):0.044154940):0.126246041,(c5762:0.370530691,(c2754:0.541455856,(c5491:0.407791593,(c6476:0.145126589,(c3662:0.579013194,c4144:0.413360344):0.505549043):0.060738294):0.130783740):0.105162226):0.054084367):0.053223677):0.181911406,c1351:0.841761125):0.203916765):0.056524031,((c4348:0.741613521,c5230:0.382917367):0.331139307,((((((c4827:0.368737330,((c6623:0.354641135,c5657:0.262774742):0.080654676,c2971:0.481055225):0.097146534):0.076938618,((((c1918:0.482012842,c4020:0.347481025):0.139784312,(((c4414:0.259002538,c4840:0.409671222):0.093544901,(c639:0.395812114,c3984:0.275743975):0.106504117):0.083487212,((c1188:0.525698744,c3510:0.550636940):0.090264419,((c3587:0.408731839,(c2408:0.574173208,c4644:0.474633599):0.092826063):0.111265538,c631:0.421812937):0.050031493):0.051342843):0.049580588):0.077927274,c3519:0.443890539):0.240657183,c5458:0.370058968):0.101888367):0.189437726,c475:0.724324150):0.063816946,c2507:0.541175574):0.055328810,(c1975:0.716389425,c2557:0.451306054):0.117176968):0.073644862,(((c5341:0.435479405,(c592:0.379014513,c5445:0.472633480):0.559382944):0.067515776,c2482:0.927522417):0.083352262,c2369:0.757072230):0.167530309):0.054859772):0.071709972):0.055667751):0.059613093,(c2530:0.757195742,(c2364:0.332070643,c2377:0.407598125):0.575073069):0.130026031):0.056972469,((((c854:0.309142162,(c5827:0.529585665,c2927:0.394257901):0.066363925):0.857373237,(((c5340:0.571786334,(c1354:0.491788757,(c602:0.359311562,c506:0.314984477):0.059483299):0.208841281):0.148724182,c5583:0.882488357):0.122111438,(((c1609:0.446122087,((c5049:0.375488727,c5127:0.559932406):0.181253468,c2827:0.864748899):0.125210699):0.119384229,(c6548:0.576899150,(c3509:0.449528984,c6625:0.358894818):0.059754183):0.050331622):0.118886079,c783:0.872101245):0.096643353):0.075803410):0.121070355,((c4083:0.328669259,c5240:0.322625340):0.572674600,(c5427:0.588894856,c3706:0.641109703):0.221176445):0.264019841):0.060357160,c4346:1.301101237):0.064387684):0.033964980,((((c2614:0.929988598,c5906:0.635261809):0.460767232,(c4441:0.289120829,c4985:0.640382171):0.286531012):0.090000608,c5065:0.604724109):0.255582500,(((c3409:0.356380827,c4292:0.619629634):0.574684375,(c3638:0.349991048,(c4080:0.282143333,(c3825:0.164285793,c4959:0.335997976):0.336729119):0.126462055):0.370508238):0.669670956,(c580:1.066485004,c6418:0.894901364):0.280280478):0.062497775):0.167482219):0.050589315,(((c3810:0.552404024,c5087:0.457338415):1.076246362,c813:0.919097879):0.191598271,(((((c2711:0.732248254,c5337:0.707677541):0.115324894,(c2699:0.492386322,c2818:0.505824522):0.124444374):0.383968963,((((c3922:0.636968518,c4079:0.701701589):0.090314082,((((c5701:0.666135126,(c4064:0.603391013,(c507:0.616373818,c2677:0.372941472):0.097112592):0.032859795):0.047684275,(c4941:0.343154986,c2870:0.499526716):0.116060944):0.058587284,(c668:0.562666831,(c1137:0.520419397,c4360:0.485190006):0.124772719):0.202505235):0.075682851,(((c1083:1.225903404,c5561:0.000000005):1.179211157,(c793:0.912451432,c6424:0.297947105):0.182723274):0.196112897,((c2596:0.681980487,((c2054:0.378711340,c2663:0.365790202):0.106420726,(c3640:0.624078801,c3547:0.400029137):0.054534773):0.088270013):0.302703371,((((c1482:0.456737924,(c4084:0.504406710,c5536:0.454162209):0.207021931):0.111284547,(c1576:0.432087355,(c1379:0.376653483,c4174:0.482724899):0.102687349):0.106321664):0.019709646,(c6281:0.368879088,(c2899:0.549007803,c6127:0.396867118):0.253874903):0.131371493):0.044969837,(c4603:0.769231466,c3126:0.431162087):0.164254241):0.075259571):0.138074649):0.062368355):0.093806847):0.113407061,(((((c2674:0.485196756,c2779:0.422021498):0.118579691,c4009:0.606436575):0.075560663,((c1466:0.813858465,c6415:0.593966997):0.164145531,(((c1450:0.524793192,c5884:0.325541688):0.169303751,(c2550:0.545752756,(c5883:0.277524207,c2860:0.647735391):0.108153401):0.093490511):0.121802808,(((c2575:0.514926398,(c2485:0.613892904,c6374:0.623740288):0.315417117):0.103245238,c5449:0.551222846):0.085954358,c1625:0.700907492):0.047916067):0.032857028):0.108146926):0.062058336,(c5338:0.918446789,(c2600:0.660069389,(c2721:0.532039169,c2812:0.392022589):0.219473934):0.315015890):0.052820146):0.045289837,c6319:0.731947066):0.070283328):0.248952492,(c667:0.789502825,c5472:1.504711401):0.501062131):0.050667002):0.176375646,(c5943:1.157731651,(c4318:0.561476997,(c1361:0.496338896,c6273:0.441145980):0.388489487):0.209687170):0.249519608):0.222675835,(c515:0.899341185,(c428:0.595923311,(c528:0.529060552,(c464:0.421107014,c531:0.455691738):0.136589763):0.076201274):0.634321993):0.317951150):0.170897393):0.060178599):0.051664605):0.058430754):0.040011799):0.054330837,((((c2278:0.619861363,c5710:1.115076258):0.365047180,c5121:1.186156363):0.183888556,(c5050:1.080318357,((c3974:1.231896438,(c301:1.842875233,c1256:0.000000005):0.366211379):0.556572681,(c4112:1.221385383,((c4250:0.584379859,c2897:0.701573892):0.149976446,c3248:1.134336026):0.267756302):0.152813279):0.101087064):0.056942151):0.257707466,(((c1592:0.776289453,((c4880:0.000000005,c6587:0.278036968):0.651273667,c2443:1.091602590):0.125782558):0.193973997,((((c2826:0.701143567,(c2718:0.667137319,c4085:0.460589520):0.204456094):0.333910007,(c2635:1.183296147,(c6039:0.332116916,(c2798:0.525797634,c3887:0.349030719):0.155061174):0.306521808):0.410654460):0.377439283,(c4809:1.534219253,(c672:0.742452408,(c2648:0.673477922,c2666:0.602991127):0.239878439):0.209704872):0.154342700):0.089321715,(c3441:0.632612144,c4924:1.087028535):0.411165324):0.046929044):0.234441401,(((((c5593:0.347906296,c5855:0.511971194):0.108690600,(c2490:0.394290623,c4966:0.154913384):0.220205841):0.188316633,c993:0.396277115):0.124671442,((c1124:0.363331834,c6268:0.284960924):0.213951342,(c5092:0.483491367,(c2137:1.583156174,c5619:0.000000016):0.358590354):0.107828135):0.092562806):0.502118366,((c6003:0.919465264,((c2266:0.194431443,c6307:0.918569803):0.095922887,(((c1536:0.362418019,c3545:0.445525507):0.151154924,(c1168:0.373959215,c864:0.588843239):0.142587255):0.042198776,c1349:0.412559377):0.141335401):0.554330165):0.088207146,((((c3651:0.502248411,c5165:1.214134558):0.072011950,c4755:0.314235966):0.206338070,c5382:0.590762717):0.696123374,(((c721:0.324232862,c3457:0.313240061):0.175729534,(c5164:0.713072453,(c2318:0.593145093,(c1835:0.258977885,c1836:0.429941254):0.049975796):0.058999242):0.276286466):0.517171482,(c1504:0.396206719,(c2661:0.506205045,c4071:0.390958105):0.142380197):0.343023580):0.152303165):0.238234056):0.074004270):0.288376127):0.093855938):0.060348741):0.041783668):0.064428684):0.018398416,((((((c1953:1.474530193,(c4884:1.272666262,(c4121:0.786372977,c5666:0.783086336):0.428015866):0.197330330):0.256379505,((c238:0.414727593,c4613:0.528658476):0.405997852,((c4578:0.867071373,c2094:0.842850783):0.490324018,((c516:0.531033503,c4871:0.931791557):0.292660912,((c1048:0.238272835,(c1017:0.399083942,((c5542:1.874268780,c914:1.053491887):0.496706685,c1324:0.252745854):0.423879266):0.285899060):0.095503263,(((c4508:0.381778239,(c4274:0.698853172,(c2593:0.219934424,c3295:0.262626133):0.251828746):0.353856719):0.471236418,(c3614:0.831146268,(c883:0.664904675,(c480:0.541456475,c2900:0.423152421):0.317509454):0.358974998):1.303168971):0.215495419,((c1736:0.393338412,(c4165:1.079307708,c3044:1.080290107):0.335037725):0.377162564,c4368:0.358474277):0.069330621):0.356787210):0.048128230):0.046124479):0.065877582):0.036594106):0.032227207,((c153:1.111162751,c4824:1.338472648):0.396634786,((c5252:1.043086349,c2497:0.774324910):0.462426736,(((c1990:1.053338941,c5236:0.428208993):0.569907183,c5867:1.819309848):0.296915611,(c5450:0.463585667,c5218:0.715926026):0.557725510):0.219079545):0.039978343):0.100712394):0.070632707,((((c873:0.487804758,c1191:0.542877184):0.183164488,(c2775:0.236056549,c4406:1.687345955):0.781890979):0.067732231,c3517:0.595273928):0.264799699,(c2748:1.192894041,(c2075:0.508275550,c2184:0.479691589):0.487036549):0.300510594):0.289339124):0.049069316,((((((c4213:1.183453664,(c1304:0.908791656,c4410:0.425870074):0.698818651):0.081057682,(((c1899:0.580845406,c1027:0.806780683):0.094548978,c6588:0.422032981):0.758534296,(c5740:1.661742029,(c909:0.905032732,c2587:0.142292738):1.720219423):0.190417657):0.222490458):0.130236245,((c2169:1.011152659,(c1866:0.000000006,c6484:0.422097670):0.228086981):0.149556329,(c2053:0.763491525,c4029:0.560271451):1.128482854):0.543956815):0.138836541,(((((c2789:0.815635839,c5115:0.801071397):1.177542742,c4215:0.951686613):0.273698338,(((c4108:1.464139222,c4803:0.389060364):0.676846554,(c565:1.008665505,(c942:0.501592728,(c5535:0.511208857,(c1243:0.427214067,(c6016:0.608075981,c1113:0.597100277):0.201343981):0.209933259):0.241603498):0.258212347):0.266963745):0.494884579,(c4652:1.311730113,c72:0.613680210):0.486394214):0.154456397):0.137097179,(c1507:1.324374364,c5266:1.978020783):0.625726537):0.132293381,(c1052:1.823079363,(c1000:1.821120351,(c505:0.799509176,c5636:0.470673360):1.425838311):0.757490248):0.106284797):0.119606739):0.077346962,(((c195:1.182500558,c1594:0.569102150):1.282175828,(c1153:1.142700239,(c815:1.984619176,((c724:0.835891047,c4129:1.054794891):0.765568655,c4660:1.472172541):0.104708912):0.172609372):0.626801592):0.400254032,((c5844:1.125785180,(c1946:0.913925358,c4815:0.896662114):1.223830881):0.509113062,((c977:0.730115607,c3780:1.214691467):0.288685798,(c3934:1.476748564,c5697:1.157702197):0.483712854):0.458862116):0.082557522):0.171369760):0.032506951,(((c4443:1.039877596,c3171:0.883558593):0.000000005,c629:0.594133443):0.579715680,(((c1551:0.111352460,c3841:0.915619768):1.009232543,(c669:2.005651879,(c1031:0.871268078,c4764:0.585035678):0.850336352):0.348477147):0.160007788,(c2319:0.936684610,(c4272:0.561757826,(c3631:0.988416330,c3865:0.723575428):0.941062373):0.164536730):0.380577182):0.051273271):0.131612875):0.052545265):0.027050239,((((((c3678:1.340298678,c4063:1.539879245):0.100114999,(c504:0.713693844,c4695:0.362374376):0.327881738):0.111269815,((c3724:0.709194928,c3829:0.000000009):0.460714629,(c2228:1.513578190,c838:0.412641045):0.299721231):0.265605121):0.110982787,(c1101:1.044170225,c467:0.790450462):0.356150766):0.117713597,(((((c6414:0.882803163,((((c1225:0.165813167,c6665:0.473883697):0.643339170,(c4604:0.867991359,c4599:0.634696139):0.198297451):0.256878604,c958:1.220669262):0.211892468,c3296:1.323061053):0.404859921):0.000000005,c5851:3.913582362):0.118928668,((c361:0.726661222,c6093:0.575948305):0.445353154,(c1956:0.888524536,c227:0.728158155):0.574840820):0.078337854):0.054208349,((c1233:0.666050690,c2801:1.089996419):0.527525821,(((c3611:1.537283703,c5792:0.587307373):0.337702142,c1474:1.148910036):0.483085418,(c3479:1.081040173,c4746:0.739919528):0.219227361):0.399834865):0.115448185):0.023363353,(((((((c5687:0.696297853,((c5588:0.295037251,(c3879:0.799516902,c5834:1.217655931):0.455931689):0.473578617,(c3965:1.267454107,(c3602:0.499517287,c4889:0.782915072):0.000000005):0.170289437):0.140081506):0.540486325,(((c1289:0.774061021,c3221:0.672656781):0.294674620,(c1768:1.135112671,c1897:0.274800133):0.299202927):0.342423242,(((c1859:0.689351346,c2436:0.911528197):0.432261302,c6542:0.786828965):0.420032519,c3753:1.122809350):0.268416856):0.279156718):0.140828488,(c2324:0.467382396,((c5244:1.468311456,(c1984:0.898081582,c5213:0.183115188):0.833636062):0.125734271,c3700:0.653532048):0.176555605):0.304503816):0.016718561,(c2488:0.427635624,c4512:1.413206119):0.814283104):0.047569282,(c4951:1.446159454,((c1226:1.062662944,(c5443:0.511453185,(c2730:0.916635752,c3782:0.807850857):0.223683424):0.021763022):0.380609369,(c2638:0.925686531,(c10:0.757694631,c752:0.716896468):0.207038300):0.460695486):0.165687221):0.174569014):0.104394686,(((c3821:1.041030146,(c4883:0.719846821,c4867:0.487218952):0.354314752):0.042828845,(c1334:0.654743909,c5752:0.350241845):0.832776342):0.254731379,(c4222:0.762993465,c5638:1.091199584):0.466178071):0.030696876):0.075031751,((((c2095:0.200199214,c2546:0.305443412):1.077072350,(c1537:0.855677179,((c1110:1.277293374,c3698:0.767879535):0.675664545,c4008:0.840844321):0.155051075):0.356338150):0.263018195,(c3103:0.840398597,(c1231:0.595665145,c4251:0.349070489):0.412268099):0.382854492):0.044450204,c4345:1.532812748):0.032241384):0.049603047):0.048040716):0.039080833,((c5556:0.982193460,c5603:0.946804648):0.227096570,(((c1520:0.651784888,c2799:0.757988434):0.461093241,((((c1986:0.556505929,c4133:0.620966501):0.414936691,((c2671:1.231888005,(c1381:0.369864306,c2076:0.629517782):0.648535830):0.698210145,((c1728:0.043756371,c2273:0.107171942):1.104199122,(c712:0.600645469,c5381:0.729397741):0.333684613):0.317321630):0.451740825):0.115528964,((((c4918:0.493466126,c5187:0.426690016):0.442282621,(c344:1.605611909,((c824:0.000000005,c1380:0.077676116):1.017451149,c2532:0.753917633):0.714053813):0.545676467):0.233624976,(c5890:0.754991106,((c1867:2.808469962,c5572:1.963886567):0.599867731,(c3039:0.000000006,c4615:0.285779633):1.238576778):0.115589597):0.092009246):0.141526480,((c2651:2.260925951,c3219:2.208729192):0.555420117,(c5627:0.381505077,(c4465:1.570199914,c5606:1.264333018):0.338284464):0.597191745):0.428144654):0.000000006):0.031713356,((c3582:1.782611747,(c1923:1.317400762,c2464:0.806306168):0.359227233):0.058681120,(c1029:0.635047036,c2926:0.000000005):1.199509609):0.122323590):0.000000005):0.034469122,(c5371:0.822409849,(c5002:0.605745143,(c720:0.259963942,c4321:0.320059694):0.186683423):0.691797073):0.250435338):0.024115546):0.030739603):0.033294926):0.023849057):0.038710462,((c3417:0.000000009,c6088:0.190268660):0.640201186,(c5964:1.658379750,c5003:1.690547957):0.000000005):0.299083165):0.006952795,c6008:1.085211169):0.025029201,(((c3226:1.020244589,(((((c4885:1.109120019,(c5726:0.658320180,c6428:0.784227733):0.416109469):0.493359900,(c4417:1.257527697,c1216:0.248723814):0.252255561):0.188988125,(((c3832:0.791898734,c5690:0.742303492):0.253313671,c984:0.992572602):0.163294951,c3800:0.678217784):0.167758774):0.000000006,((c119:0.285910222,c3347:0.751067851):0.829823982,((c3853:0.133294274,c5370:0.353052784):0.708078014,(c708:1.739927312,c6486:0.665512076):0.876027378):0.181320498):0.063637877):0.107627273,((c1249:0.426844054,c2833:0.688499225):0.364857923,(((c1066:0.350236021,c4343:0.344509043):0.453479953,(c2491:0.598026718,((c4168:0.199662707,c4436:0.165687530):0.481972923,((c1227:0.415392694,(c3011:0.307638060,(c4092:0.163231407,(c1955:0.139640187,c4338:0.090559644):0.121356021):0.057734633):0.069975259):0.115833912,((c951:0.657756774,(c612:0.099202264,c2110:0.132533082):0.299655820):0.066850292,(c604:0.630726803,(c2982:0.687519888,c3082:0.391875211):0.139271979):0.160575396):0.165047662):0.147123919):0.131600393):0.023832225):0.120718992,(c4113:0.963750836,(c440:0.984041146,c2751:0.561670209):0.360426926):0.157043642):0.163081073):0.074648192):0.027358822):0.000000005,(((((c2365:1.083868444,c1404:0.477872883):0.299023018,c664:0.652213864):0.114175238,(c2591:0.700233062,((c5042:0.982444224,((((((c5104:0.372197082,c4656:0.496388957):0.109203920,(c751:0.304061432,(((c4954:0.533323848,c5134:0.292883501):0.167105398,(c4700:0.243659639,c5969:0.380454765):0.079967396):0.080133851,(c3818:0.267254912,((c4890:0.153135418,c5075:0.133793385):0.220548523,(c3935:0.150465455,c5864:0.101805412):0.122683509):0.070077857):0.043819575):0.051635623):0.062990541):0.128845938,(c4982:0.251550429,(c2219:0.615381450,c5078:0.228339079):0.122549055):0.155244565):0.065072201,(((c643:0.151768818,(c644:0.097745502,(c641:0.071687670,c642:0.069383017):0.057271107):0.049532767):0.049516572,(c5438:0.262913831,c5756:0.535470224):0.148754087):0.313059058,((c453:0.329712379,c5378:0.355429298):0.341481309,(c3845:0.469517286,c5225:0.435272327):0.049542573):0.044117524):0.055787364):0.051650921,((c5623:0.567259834,((((c1966:0.445802353,((c216:0.236349759,(c626:0.492804133,(c627:0.449733959,c1983:0.644398079):0.288622757):0.075304740):0.020569532,c2133:0.455728755):0.063895266):0.063697366,((c1977:0.257593923,c3999:0.298504290):0.062507662,((c2015:0.235649835,c4115:0.162956227):0.081931464,c2136:0.316418828):0.106460260):0.034952181):0.037854029,(c2014:0.372337992,c2016:0.357801162):0.073827803):0.180746541,(c792:0.265430696,c979:0.554422717):0.047226170):0.039719230):0.047229841,(c5749:0.675296796,(c522:0.285113350,((c5145:0.159253358,c5870:0.588275110):0.044465993,c4225:0.321992455):0.107813181):0.081094096):0.092379217):0.069157224):0.088668048,((c386:0.542090910,c1214:0.978589760):0.330192289,(c459:0.889404389,(((c1954:0.046494179,c747:0.389309794):0.036007098,c6288:0.000000005):0.046747666,c4109:0.189191565):0.262327450):0.105647862):0.217858787):0.066828589):0.040393463,(c2342:0.531979980,(c1051:0.372294244,c5882:0.742405044):0.250714305):0.368540287):0.074941130):0.095711042):0.136225661,(c738:0.648681917,(c4163:0.522028530,c6292:0.461469623):0.292426439):0.120207805):0.038020156,(c2509:0.508132264,c1403:0.574018553):0.144900618):0.056713761):0.032755499,(((c1593:0.825942261,(c1992:1.129862918,c2398:0.000000016):0.821004544):0.240268708,((((((((((c2919:0.370763901,c5872:0.351058511):0.099898914,(c5938:0.430334944,(c3912:0.361394412,c5794:0.382005532):0.094372580):0.042827668):0.102166240,((((((((c3216:0.463720751,c6336:0.682365961):0.205774121,((c784:0.674056535,c5804:1.004919780):0.322658889,c5135:0.361926721):0.180423705):0.102434378,((c6613:0.379854394,(c3997:0.000000005,c5930:0.221259426):0.686671261):0.224177983,(c2311:0.836828998,((c5681:0.324449932,c6369:0.068639795):0.151448459,c685:0.435520432):0.172752665):0.128820734):0.108783913):0.014175426,(((c3068:0.278560742,c5891:0.395105536):0.312362360,(c5101:1.959618717,(c684:0.255044111,c4173:0.360030358):0.522971220):0.183347111):0.162375773,((c1341:0.472907837,c3178:0.407266612):0.313173226,(((c4411:0.335862126,(c4886:0.483740407,(c1883:0.343439695,c4254:0.224212803):0.051763647):0.103714752):0.651838644,(c1019:0.475534941,c5933:0.410867692):0.163738060):0.122022714,(c3904:0.623057251,(c1572:0.485326084,c3990:0.475421255):0.662745433):0.387812891):0.093818280):0.055223078):0.113054734):0.043537428,((c997:0.666064442,c5462:0.720837186):0.581724141,(((c3919:0.191497515,c5965:0.506179963):0.163983422,(c2997:0.412630033,(c3830:0.478897043,c3372:0.300551328):0.034520055):0.043989525):0.079832121,(c3104:0.282506274,(c2466:0.419847289,c4952:0.513221602):0.063076495):0.112336385):0.134101858):0.129227061):0.050025148,((((c5455:0.440960090,(c5842:0.483291446,c6285:0.427589435):0.105827906):0.057060064,(c3768:0.250020794,(c2194:0.249590705,c4252:0.398950950):0.103135965):0.058743848):0.083633342,((c4638:0.366393043,(c362:0.258104928,c3043:0.209642178):0.069684260):0.151472235,((((c972:0.373181961,(c2944:0.313447763,c3899:0.327258467):0.054511565):0.106425561,((c184:0.131790563,c2656:0.085778203):0.191307453,(c191:0.211685071,c544:0.599793144):0.226300452):0.082938496):0.130954495,((c1611:0.130993742,c4636:0.257282993):0.299803004,c4241:0.445945772):0.035711758):0.062643242,c5949:0.309028265):0.054463209):0.068355270):0.034157490,(((c537:0.416815767,(c1427:0.289948123,c5653:0.335322277):0.060196782):0.140035885,((c5865:0.484560648,((((c3099:0.327977332,c4363:0.341225163):0.166768220,((c1960:0.321145499,c2062:0.378954370):0.058356478,c5166:0.472213595):0.016982824):0.032264762,((((c3284:0.135288771,c4935:0.270706007):0.141271495,c3673:0.392244387):0.153809167,c859:0.401992408):0.048117977,(c773:0.271559505,c5680:0.455601643):0.085641256):0.039863828):0.056040705,(c4295:0.300874308,c4347:0.304984023):0.183000322):0.045705350):0.114272641,(((((c1989:0.420543236,(c1047:0.315359062,c4552:0.476336497):0.064314408):0.035861756,(c43:0.382644582,c2309:0.378947190):0.111747457):0.028063076,((c836:0.348213166,c2201:0.396631455):0.088151976,(c1500:0.397582797,c4408:0.407996092):0.107741096):0.086290073):0.044571757,(c5939:0.201367908,c5975:0.172563795):0.260382877):0.026091665,(c1634:0.400791745,(c662:0.413270449,c5840:0.477663521):0.096039299):0.073184132):0.090012870):0.033745852):0.030226862,(c4279:0.167565750,c5025:0.173310870):0.336591624):0.030274822):0.033308760):0.020468886,(((c3224:0.348271366,(c2524:0.427328190,c3249:0.380110370):0.270405680):0.108262622,c2764:0.440534836):0.035111002,((c4891:0.380193826,(c2976:0.306029495,c4249:0.448975708):0.092958730):0.075811454,c4244:0.571251605):0.090460375):0.064705789):0.064332768,((c1752:0.289099221,(c1818:0.683510645,c4451:0.237881205):0.111382149):0.225459623,(c2159:0.524165985,((c4450:0.256005330,c6289:0.344329422):0.075105146,(c4468:0.260595716,c620:0.479233896):0.106997803):0.066378840):0.061433650):0.056514276):0.030346158):0.068305108,((c2669:0.537639519,c2755:0.269597942):0.164766599,(((((c5733:0.542050648,(c5412:0.250310760,c5918:0.156606108):0.087232165):0.055611222,((c3615:0.446362362,c6045:0.312692465):0.047608713,(c1202:0.306890310,c5932:0.350725195):0.091000828):0.040914838):0.054356299,(c3793:0.212859254,(c1931:0.118795986,c5451:0.101466534):0.101881319):0.134101908):0.087342913,(c885:0.503583120,(c1807:0.420013725,c1783:0.409202527):0.060950134):0.063415629):0.043849720,c4461:0.584261430):0.054573485):0.102974725):0.027788944,(c736:0.367633446,(c2147:0.480983391,c2849:0.325269949):0.110472103):0.123339519):0.023723286,c704:0.970900294):0.060653237,(((c3843:0.547714988,(c259:0.699825590,c435:0.629557352):0.209824162):0.353077011,((c4487:0.590573147,(c2687:0.583608308,c2198:0.412419325):0.063897938):0.053973076,((((c4445:0.518700778,(c4202:0.443933316,((c4197:0.055618843,c4473:0.354250024):0.165374248,(c699:0.193723083,c1894:0.292623861):0.090806445):0.191622984):0.100846836):0.249561976,(c3096:0.496033389,(c3866:1.220215227,((c4157:0.019421559,c4160:0.011214488):0.165555003,(c5874:0.302531520,(c4536:0.291894110,(c5978:0.000000005,c6675:0.000000005):0.108561368):0.050300821):0.129207273):0.052700561):0.324258697):0.555394303):0.100909520,(((((c4429:0.468730895,c4208:0.322680630):0.108608861,(c2965:0.439957614,(c1063:0.570345472,(c3913:0.342731681,c5551:0.371568821):0.244399167):0.089030861):0.035952075):0.105314067,c4095:0.507862301):0.071632652,c1816:0.611624207):0.092359192,((c4357:0.754246234,(c3107:0.342819809,c3819:0.312323402):0.159948726):0.059734033,((((c1766:0.354533783,c3643:0.344710009):0.187258919,(c1644:0.357611047,c3326:0.272381939):0.040703989):0.050723756,(c3088:0.275619083,c3138:0.542949604):0.131311133):0.061178695,c2502:0.374102226):0.073467190):0.082979785):0.079759003):0.054372476,((c2272:0.343754976,((c4729:0.821620976,(c563:0.645154897,c3377:0.585561224):0.237992287):0.206520960,c2961:0.707202776):0.086047291):0.210146072,((((c1814:0.380458959,c3075:0.475370715):0.078063474,(c3077:0.168520089,c671:1.190885775):0.191677523):0.051255629,(c3873:0.396555707,((c2869:0.270424932,(c2780:0.268549291,c5956:0.348298514):0.078339228):0.066913456,((c2981:0.194808515,c4577:0.451909491):0.025704629,((c1785:0.220893860,(c3094:0.512798088,c2256:0.357408082):0.052236542):0.089625348,c4865:0.258834849):0.087960371):0.049921519):0.068841638):0.105913546):0.057428901,(((((((c3234:0.352896610,c4189:0.382799591):0.102504125,(c2843:0.574875390,c6350:0.331150681):0.123132117):0.055303461,(c2607:0.538920264,(c4515:0.348368840,c4635:0.288908970):0.042479608):0.054870948):0.056462867,(c2744:0.236635261,c1408:0.593213319):0.172836305):0.031780120,(c2639:0.410577502,c4462:0.362329265):0.085619619):0.126083324,(c3010:0.401223350,c5380:0.411200435):0.296097470):0.024452520,((((c3301:0.354143277,c3399:0.514441404):0.061570860,c3174:0.557951638):0.036352795,(c3327:0.396532364,c3394:0.420253267):0.095700060):0.045200419,(((c2237:0.337953416,(c742:0.435344975,c5398:0.451871342):0.113734233):0.129004575,c1058:0.452126653):0.071453116,c2078:0.445352289):0.015645023):0.035640294):0.028997763):0.164928489):0.106997482):0.081695014):0.040200481):0.069470745,(((((c5990:0.450834743,c2402:0.682724290):0.104185323,(((c2422:0.423237540,c2499:0.458622998):0.227406943,(c1837:0.613932952,c3242:0.413092999):0.077185342):0.097360585,((((c770:0.386499641,c5607:0.280704325):0.179247285,(c5067:0.000000007,c5950:0.508808153):0.657299834):0.044400100,(c2061:0.311017337,c3282:0.568705947):0.236279008):0.059869040,(c5047:0.507113480,c2735:0.504627639):0.059771324):0.037415749):0.035967031):0.013462891,(((c1616:0.349952106,(c4010:0.286590003,c4373:0.321334530):0.151064677):0.248133691,(((c4492:0.293402710,c2747:0.440444473):0.111976823,c2928:0.367117293):0.066043574,c4430:0.422752551):0.089285539):0.147233329,((((c3227:0.353576556,c6359:0.358882697):0.081978708,((((c6015:0.254107343,c6074:0.248653534):0.071852447,c5590:0.252722467):0.076094227,((c3109:0.195569617,c3963:0.271827735):0.158100786,c884:0.485186435):0.066051867):0.037602279,c4201:0.254974243):0.081537912):0.116389173,((c3208:0.251248502,c3925:0.251097545):0.176706581,((c2756:0.315158394,c5592:0.345281584):0.114953839,(c3320:0.388562742,c2884:0.338653190):0.102734367):0.076228311):0.051062518):0.077474238,(c2640:0.454514041,c5839:0.444094429):0.101529359):0.071812758):0.105013234):0.054708579,(((c1604:0.671669279,(c2641:0.485981229,(c2885:0.310266908,c4505:0.386813984):0.085959123):0.126268009):0.089355553,((((((c2505:0.354548121,(c3933:0.200297782,c6091:1.007025324):0.225216469):0.070460698,(c3839:0.693268274,c3846:0.341577026):0.098322980):0.026094511,((c264:0.337515430,(c5529:0.060368400,c6515:0.016833501):0.235209185):0.089104849,c4606:0.455133946):0.155230017):0.044861292,((((c4804:0.452086663,(c6371:0.423362210,c2508:0.376626287):0.074376524):0.070807685,(c4906:0.283552213,(c3748:0.328063995,c3834:0.396242614):0.054581712):0.069368294):0.061277229,((c6516:0.257844459,c3470:0.366438129):0.186703761,c1558:0.385468089):0.061602081):0.032373485,((((c5902:0.752938593,(c4105:0.467014613,c5831:0.406252003):0.042273728):0.026044970,((c5564:0.274991060,((c1522:0.192230611,c6536:0.173188457):0.225253699,c777:0.363065971):0.101513008):0.188353952,((c462:0.360911981,c5585:0.308053184):0.068065908,(((c4948:0.416274118,(c5808:0.423159738,(c4359:0.362323213,(c882:0.212919428,c2235:0.298641640):0.128415966):0.094171950):0.049945577):0.027081457,(c1187:0.557724817,(((c3241:0.962888799,c6459:0.690937468):0.293817044,c1981:0.470715552):0.335567106,c4356:0.887773192):0.254334349):0.287083152):0.031160808,(c4864:0.382780197,(c345:0.401408024,c4939:0.210923351):0.095071471):0.050893125):0.031607453):0.076930466):0.090374385):0.077395072,((c3756:0.309818094,(c3769:0.308310636,(c4077:0.326815994,c3900:1.170798270):0.238094787):0.079485479):0.073606470,((c2939:0.369391645,c426:0.370954589):0.108948736,(c3293:0.353301989,c3289:0.363315020):0.057683425):0.071418381):0.049737336):0.028981705,((c5248:0.431479018,c2937:0.395937900):0.140623610,(c4546:0.318266398,c5533:0.439627899):0.101402653):0.067280534):0.046441938):0.048251814):0.067792010,(c3690:0.502685024,c3287:0.444622259):0.077598669):0.052764143,c3137:0.618407036):0.079658791):0.048841041,(((((((c3261:0.352199970,c5147:0.370926859):0.080993842,((c3198:0.338218087,c5175:0.573706357):0.062698316,((c3141:0.498312552,c6267:0.363430018):0.118102320,(((c3304:0.303680591,c3766:0.263301068):0.103969456,(c6025:0.484812865,(c4541:0.269401590,c921:0.424850020):0.138080463):0.067027336):0.040866345,(c3398:0.412137787,c5131:0.489700719):0.119766219):0.023900329):0.051050928):0.043589696):0.040379668,((c4247:0.315138603,c4472:0.423075066):0.084465641,(c2277:0.522905597,c4182:0.405147048):0.077781264):0.076075872):0.035800485,((c4070:0.337950040,c4375:0.576057647):0.255883573,(((c4379:0.471802004,(c3953:0.376387496,(c3524:0.370119845,c3785:0.369124195):0.076257137):0.070170995):0.070180065,c6084:0.433904767):0.063832401,(c1780:0.619650660,c3920:0.522550529):0.137295450):0.031102353):0.094713776):0.053605432,c2055:0.436108047):0.082059336,((((c856:0.212323009,c1448:0.265866633):0.235458645,(c1059:0.438190763,c5129:0.401197791):0.063525962):0.168358933,((c5431:0.410637991,(c1229:0.227297205,c4327:0.279037378):0.081107644):0.247514576,c3796:0.566667428):0.037843861):0.093694125,(((c6301:0.744536937,(c5188:0.474370533,(c3014:0.291133313,c3139:0.198350537):0.184345680):0.092330112):0.064621387,((((c4588:0.408961353,(c2533:0.345483130,c6047:0.308032377):0.056046909):0.052358964,(c1562:0.397670850,c6500:0.382589602):0.095369562):0.055724388,c5806:0.633195610):0.030698509,(((c998:0.212349643,c4828:0.227563272):0.446391768,(c1825:0.136260512,c5040:0.420632326):0.280733741):0.021806236,(c1114:0.478977348,(c1005:0.000000006,c6604:0.664648308):0.343516480):0.138335885):0.053600832):0.104287684):0.054994701,(((((c170:0.618022150,(c3790:0.526593479,((c3804:0.339862043,c5557:0.350904239):0.047244596,(c3849:0.314298017,c6382:0.379801058):0.050227327):0.013528979):0.034411478):0.058135882,((((c3788:0.312857632,c3797:0.223406715):0.430168165,c3801:0.344125652):0.035844733,(c3799:0.304958792,c3988:0.522395541):0.104723596):0.060030869,c3803:0.461134063):0.086249820):0.040090157,(c3802:0.404157540,c753:0.477305634):0.248725309):0.065708190,c444:2.778557726):0.000000017,(((c5737:0.436665889,(c560:0.453035619,c5315:0.447644284):0.067771198):0.026647369,c2560:0.385164053):0.054813059,(((c2415:0.208673298,(c421:0.330385337,c5977:0.405414719):0.092521567):0.269804969,c4823:0.411671929):0.046824028,(c3905:0.342064539,c5659:0.426884596):0.115440280):0.054219207):0.057857500):0.060415180):0.020681333):0.016620614):0.051706082,((((((c861:0.624483039,c5760:0.292478114):0.192848742,(c579:0.295296897,c5812:0.188162225):0.188998307):0.114069992,(c3275:0.413135003,((((c4623:0.498264610,c4791:0.571726078):0.074288309,c2193:0.450437838):0.109878476,(((((c5825:0.294880982,(c5469:0.435585532,(c767:0.302217531,c1131:0.200767506):0.096718996):0.109886212):0.075025712,(c456:0.281474859,(c940:0.067986052,c3798:0.703889884):0.316039500):0.046714818):0.070044476,(((c116:0.0,c117:0.0):0.252066450,c918:0.224695145):0.118555455,c4938:0.467246401):0.078283140):0.051856344,((c3532:0.472786172,c613:0.362562188):0.107907371,((c2083:0.333629116,(c4698:0.376877278,(c2131:0.414724936,c5085:0.344787928):0.125039719):0.048815825):0.045211862,c3204:0.334084498):0.109124013):0.042187614):0.056262957,((((((c2247:0.269547099,c5072:0.127024090):0.190590059,(c572:0.343220516,c973:0.254355351):0.145866317):0.061629013,(c3507:0.381774084,c983:0.474031708):0.086822748):0.056723495,((((c2480:0.045214136,c5664:0.287158714):0.370517705,(c1498:0.129828997,c1499:0.308981356):0.314103625):0.191057420,(((c1203:0.899137734,c623:1.080788357):0.416874131,((c378:0.136520832,c2993:0.232628639):0.216535973,c5123:0.331277022):0.025390818):0.000000005,(((c3475:0.309261809,(c4507:0.136401011,c913:0.235720504):0.211279150):0.056468017,c4708:0.405481926):0.037168579,(c5039:0.278702063,(c2558:0.617085941,c5036:0.379490794):0.121034069):0.049724825):0.041146744):0.060397328):0.101610376,c5702:0.385243116):0.047491162):0.049981831,((((c782:0.063755301,c3559:0.078508404):0.465906742,(c992:0.272269248,c5913:0.440971897):0.038691190):0.105983616,c3976:0.414455251):0.029239842,(c2886:0.442807282,c5985:1.503650751):0.200714432):0.094781053):0.039848791,(((c4797:0.345493453,(c5703:0.349198512,(c4485:0.373655696,c4688:0.205687780):0.111452920):0.057789937):0.137376601,(c3353:0.405910585,(c674:0.212241099,(c4434:0.118547473,c4435:0.004639556):0.251018893):0.233129270):0.073521603):0.063234194,((((c1759:0.300256020,c3856:0.856156370):0.107227337,((c5419:0.411924232,((c1366:0.445245363,(c3332:0.301751850,c5098:0.374135909):0.061666227):0.087143193,(c1542:0.256233093,(c1007:0.407714017,c2135:0.155098389):0.314854636):0.066975570):0.046068052):0.164714135,c5953:0.790792778):0.014730092):0.029761606,((c956:0.535323348,(c5661:0.266404201,(c2716:0.767128017,c3529:0.000000005):0.392400997):0.089605027):0.079030217,(((c2991:0.319024229,((c3076:0.194258176,c2320:1.426922226):0.382884718,(c206:0.144215388,c4205:0.432105846):0.486299923):0.054702751):0.031772878,(c5130:0.000000005,c4736:0.000000005):0.649442139):0.045547414,(c3345:0.913171707,c4341:0.122407590):0.199442861):0.114745981):0.103147481):0.040298501,(c5077:0.344346025,(c635:0.193833388,c4757:0.310373754):0.190882232):0.070844846):0.122230879):0.020504491):0.062433049):0.069122035):0.070967712,((((c616:0.375902046,c5182:0.460269663):0.077235737,(c5103:0.665260933,(c6326:0.123660140,(c1788:0.450135908,c3786:0.216615096):0.034598155):0.100828455):0.133988227):0.057728031,(c3924:0.321681192,c1494:0.838115056):0.179415073):0.062129082,(c5295:0.375414368,c2846:0.495251173):0.132268325):0.053735090):0.034838091):0.034746770):0.039230208,((c4649:0.499060259,(((c4868:0.365042571,(c1732:0.309000519,c3772:0.471486105):0.082728430):0.249664098,(c2132:0.141507599,c4968:0.949568894):0.199028158):0.183655721,c4943:0.315992812):0.066312054):0.071941706,(c4372:0.638172908,c4861:0.641619787):0.136008315):0.077537054):0.041989210,c3318:0.630176485):0.044982821,((c5718:0.366915146,(c765:0.345435308,c5343:0.715233518):0.069649103):0.155682050,(((((c1296:0.450453371,c4075:0.316428605):0.106174280,(c5727:0.352969503,c1550:0.337337201):0.047550543):0.037304552,(c2022:0.224270451,c5515:0.152801418):0.165379874):0.181282077,(c4634:0.464787004,(c5972:0.472025781,c6503:0.513162990):0.140827089):0.063071739):0.057794399,((c1001:0.356447242,c5041:0.468917623):0.078997055,(((c5287:0.440725698,((c4845:0.231683673,c5934:0.303789946):0.166512239,(c3685:0.539875290,c6407:0.098386987):0.207745463):0.089718428):0.084561667,(c1036:0.745369890,((c368:0.507096335,c739:0.280818518):0.072356826,((c4947:0.277288760,c5254:0.255144365):0.076271039,(c514:0.322896390,c5570:0.494455740):0.052290345):0.099123472):0.015155816):0.022821927):0.049765196,(c2087:0.384351266,(((c5106:0.315203567,c3012:0.669186747):0.090852124,(c427:0.340883976,c406:0.337194857):0.043435559):0.059249075,(c1230:0.259566893,c2468:0.544975947):0.106976203):0.069024102):0.154142043):0.064114211):0.163792636):0.061037545):0.074254827):0.041849666):0.032335656):0.043063098):0.045509759,(c2980:0.733411125,((c2646:0.399969531,c6485:0.362382017):0.168302777,(c3015:0.310111420,(c3286:0.532868854,c3348:0.422733965):0.229632396):0.115533899):0.139983384):0.093882444):0.032314873):0.061606909):0.043918006,((c840:0.808837130,(c2043:0.727546334,((c703:0.495723971,c3537:0.358828656):0.112652110,c536:0.564769634):0.092539746):0.210053997):0.041325487,(c923:0.315710388,c3380:0.411736393):0.492976014):0.054769023):0.041305030,(c2281:0.695415567,c4351:0.648225549):0.136308555):0.110040639,(((((c695:0.423809863,c4459:0.453672521):0.451609423,(((c193:0.022989349,c4237:0.000000005):0.640880033,(c1926:0.422896938,c2200:0.963567395):0.151308322):0.089161356,(c5481:0.412195274,((c825:0.095497969,c2853:0.000000005):0.318591366,((((c3264:0.616048517,c4111:0.342889016):0.055929692,c3173:0.376417558):0.032532022,((((c2963:0.313894648,c4233:0.364404503):0.111353613,(((c5356:0.289105445,(c2434:1.117731636,c1614:0.748616415):0.258874550):0.097866045,c2568:0.221449958):0.065113391,(c1198:0.294466286,c2313:0.218049109):0.122037553):0.035799202):0.075548139,(c165:0.290371117,c2552:0.172649776):0.185804271):0.034461060,((((c4207:0.297172448,((c4480:0.393627234,c6320:0.353751179):0.045475866,c6389:0.282250735):0.061316938):0.065712774,(c3147:0.700669624,c2195:0.274903135):0.097334785):0.053774829,(c4897:0.411341531,c2392:0.375283738):0.096539838):0.071398553,((((((c3679:0.454460866,(c2742:0.332316655,(c4524:0.444488342,c3267:0.192886309):0.101314975):0.098383344):0.048898980,(c4192:0.362451341,c4326:0.330866296):0.081609779):0.046801965,((c4170:0.428706807,c6040:0.424926247):0.207650234,(c3093:0.535142860,(c2166:0.454015540,((c389:0.300310484,c3608:0.358738102):0.131363454,(c652:0.295274963,c904:0.354121776):0.061577341):0.059498099):0.109294072):0.061394198):0.053496840):0.034384156,((((((c1344:1.150026737,c1596:0.650189570):0.123431797,c5993:0.258790840):0.089640662,((c2681:0.280763544,c3923:0.234054865):0.162211625,(c3371:0.317824870,c4511:0.380874887):0.161630671):0.093464393):0.047902801,(c878:0.557648607,((c396:0.354539890,(c1348:0.418601052,c4285:0.191225177):0.192177504):0.067726102,(c4264:0.275145817,c3236:0.476250307):0.107257731):0.094925559):0.109264568):0.043262785,((c3683:0.000000005,c6086:0.154979746):0.473132071,(c651:0.466246943,((c4498:0.305641519,((c1:0.000000005,((c6594:0.0,c6596:0.0):0.000000005,c6595:0.000000005):0.000000005):0.155201379,(c3063:0.178627453,c6597:0.143366490):0.141229364):0.166904156):0.212792741,((c1927:0.421105857,c3102:0.288273368):0.116640445,(c3245:0.320078382,c3133:0.430984961):0.028263194):0.018852893):0.050190689):0.084558186):0.055040856):0.031945495,(((c3880:0.248826678,c5617:0.356288887):0.078761247,(c4188:0.458047582,c3378:0.209047381):0.109150848):0.072689096,(c630:0.458404598,c4771:0.413930012):0.209647932):0.060954653):0.037301944):0.037674608,(((c542:0.467317070,c3225:0.486303885):0.114451036,(c1943:0.535611013,(((c2725:0.306266083,c2752:0.225139071):0.131123864,((c2254:0.214434214,c3142:0.193561310):0.063188566,c3538:0.418177607):0.142844334):0.030813519,(c920:0.738961226,c242:0.247602172):0.392976304):0.037576850):0.077731721):0.024669413,(c5904:0.365581985,c1769:0.351998405):0.108147973):0.029894956):0.019085394,(((c5963:0.455599143,c1789:0.314510824):0.108481544,(c5552:0.347070691,c748:0.818276860):0.116812299):0.014212098,((c4733:0.307315976,(c1739:0.480165405,c3506:0.468229158):0.185171100):0.101237590,c2030:0.408532755):0.034748244):0.056753208):0.023541267):0.023896855):0.045460168):0.027395180,((c1723:0.177965387,(c4350:0.419219305,c4349:0.016269165):0.103213306):0.071938250,(c6661:0.000000005,c6662:0.000000005):0.166991779):0.070480363):0.045180538):0.120162188):0.057843046):0.049188615):0.069761089,(c4437:0.475544880,((c1828:0.193317996,c1834:0.235036661):0.565488416,((c715:0.153914577,c1078:0.108660476):0.620932797,(c4949:0.452166664,(c2218:0.628172025,(c3918:0.415976364,(c3281:0.509277549,c6266:0.295879842):0.133841406):0.269443219):0.131761840):0.065222615):0.030865235):0.138479310):0.093563337):0.123283334,((((((c688:0.672812233,(c1011:0.594982113,((c5937:0.462271576,c1135:0.447466745):0.021579687,(c1571:0.421152208,c2597:0.372348794):0.172330893):0.057930681):0.087314867):0.074541025,(((((c2041:0.389110993,c4683:0.502445782):0.111259205,c5096:0.613430714):0.078181970,(c892:0.547178293,c1563:0.734587286):0.085649130):0.064087249,(((c3787:0.494422090,(c431:0.707297066,((c4642:0.258222568,(c3474:0.229185185,c3435:1.580841260):0.433149328):0.161218375,((c451:0.309063165,(c4622:0.430963427,c1567:0.379339459):0.097495323):0.071477652,((c5270:0.268384116,c5385:0.455387378):0.751208868,(c1215:0.526006248,c3404:0.198566428):0.273277078):0.068579973):0.036429544):0.109757478):0.031044617):0.022477537,(((((c5158:0.107857970,(c120:1.028614646,c3951:0.000000005):0.565661393):0.292289138,c2417:0.425751482):0.052125762,(((c3298:0.208516829,c4389:0.870643320):0.143666598,(c4739:0.643339475,c4056:0.317756258):0.096038874):0.112329541,((c429:0.231807221,(c3232:0.380755561,(c2960:0.339363292,c4516:0.311766659):0.254988216):0.274434166):0.083901057,c3131:0.398305463):0.199725938):0.107219398):0.048073249,c759:0.533526060):0.037350955,(c711:0.401521053,(c5054:0.228250063,(c1934:0.280501345,c3734:0.506352463):0.092121995):0.148463584):0.082713100):0.059027044):0.040112309,(c546:0.446333250,(c3146:0.664429117,(c485:0.565329938,c3663:0.510735246):0.071404955):0.093967187):0.088462446):0.050740402):0.076846771,(c578:0.341746043,(c857:0.066556741,c5334:0.132174441):0.279885460):0.552765727):0.075728043):0.083281236,(c3583:0.473291647,((c4313:0.226491118,(c4895:0.527280063,(c3681:0.105372107,c955:0.131394127):0.185498106):0.095623154):0.073907136,(c5066:0.955735289,((c5924:0.154504368,(c938:0.126495689,c5940:0.155952332):0.020352461):0.051837771,c6038:0.174406280):0.053546946):0.108400493):0.228481668):0.379619131):0.076985330,(c907:0.520045007,(c4331:0.461409448,(c2907:0.477125681,(c6321:0.404423398,(((c70:0.372859797,c5951:0.311461219):0.184349817,((c5613:1.773755642,(c1952:0.163494845,c2052:0.430478358):0.138991611):0.065037054,c3407:0.360974008):0.081107425):0.069632236,(c3313:0.399361223,c5923:0.367486716):0.050971501):0.082311719):0.085249318):0.123523572):0.246938920):0.186629527):0.018143041,c3162:0.597433689):0.022153377,(c540:0.742888010,c4432:1.436699877):0.238788212):0.045737652):0.033446695,((c4915:1.225784146,(((c2653:0.549402099,((((c5540:0.198151697,(c343:0.115284562,(c2007:0.000000012,c5833:0.759299457):1.160859910):0.075955511):0.214265349,(c2739:0.369120151,c6295:0.447818204):0.075446833):0.066714895,(c2972:0.386153699,(c3105:0.273238669,(c6012:0.162315693,c3921:0.412312636):0.275886648):0.236395054):0.038979709):0.046288260,(c5644:0.376015451,c896:0.569979600):0.090906112):0.042951934):0.017067710,(c4497:0.477827057,c4876:0.369554086):0.082846405):0.072134961,(c916:0.394554562,c1948:0.904596213):0.151450712):0.046387620):0.023626926,((c2425:0.625620665,c4469:0.508951784):0.201184068,((((((((c2876:0.455154437,c4427:0.538767005):0.093978338,c2974:0.508348649):0.044551122,c5656:0.634662850):0.067042477,c4332:0.482331181):0.045546897,(((c837:0.421601788,((c346:1.326168191,c5048:0.445427745):0.346548131,(c2901:0.599875705,c4447:0.605379640):0.111367655):0.070247985):0.092230170,(c3533:0.588796919,c4282:0.827453790):0.175010845):0.022356233,(c2817:0.409847902,(c4463:0.801612643,c4526:0.180117524):0.086556078):0.065244386):0.040487281):0.044599886,(((c2125:0.441565493,(c2999:0.430277993,c3863:0.310288770):0.127894285):0.117466953,((c3388:0.410907541,(c1770:0.250058388,(c2456:0.126294367,c3143:0.109424511):0.212488290):0.080959423):0.128863252,(c872:0.526726862,c4519:0.308471900):0.144727427):0.048872580):0.059020715,((((((c2231:0.374457266,((c3842:0.653781405,(c2112:0.128939338,c2246:0.110522853):0.258386313):0.176660846,((c4726:0.022442089,c4742:0.020494961):0.281326968,(c3964:0.319595443,c2234:0.332855387):0.060698567):0.033961953):0.050162826):0.068686681,c5916:0.462540293):0.030448852,((c1620:0.361933601,c2935:0.296580145):0.095526344,(c717:0.331460007,c2217:0.427431232):0.073967677):0.070990946):0.058299497,(((c4195:0.571188423,(((c3159:0.491502129,c4489:0.388027966):0.066971766,(c1263:0.247062789,c61:0.103507071):0.272848628):0.052774448,(c1717:0.371759835,c2163:0.488882702):0.070372320):0.016355473):0.010596290,(c3805:0.662582671,c5915:0.358243271):0.127778563):0.038499538,((((c3527:0.322952661,c5823:0.419407661):0.083788765,(c2650:0.380349145,c4506:0.414632923):0.078821617):0.048881498,(c511:0.258770712,c3079:0.330089509):0.078719373):0.041025017,(c3229:0.393744595,((c2242:0.356504610,(c3179:0.474852623,c3050:0.339671355):0.086140937):0.058799264,c698:0.419153676):0.072399256):0.061379150):0.024326947):0.050874226):0.051129728,((((c3490:0.101095942,c3930:0.432747611):0.250091296,(c1772:0.382382648,c2840:0.360143218):0.060059615):0.080450375,(c4944:0.329378334,c4236:0.353757486):0.053044471):0.049413901,(c4460:0.413654527,c6586:0.344807223):0.113378820):0.035059219):0.019716327,c1965:0.470507244):0.024768825):0.039671868):0.044795136,((c796:0.650618101,c2538:0.232724102):0.226853697,(c6026:0.504052508,(c2854:0.475848556,c3835:0.407678311):0.075486481):0.199651783):0.077967172):0.049954751,((c4853:0.410560471,(c1817:0.269047914,c6351:0.335780062):0.093187974):0.054049814,((c3252:0.450026531,(c329:0.441805087,c1726:0.290453920):0.092949625):0.104889509,(((c3603:0.302904500,(c2851:0.389617032,c4337:0.274042559):0.045139185):0.097738133,(c4892:0.257534122,c3851:0.490037611):0.101138371):0.045458969,((c553:0.471820015,(((c1623:0.256616635,(c3288:0.322610535,c3316:0.328365848):0.044808227):0.096730325,(c1812:0.315651018,c1829:0.520186999):0.099291455):0.022441876,c2032:0.511019183):0.037477309):0.079570754,((c3211:1.045485973,c6315:0.247583455):0.222556613,c3235:0.323270510):0.095111252):0.055614733):0.026157643):0.033017810):0.037190905):0.043863736):0.055691908):0.163023941):0.039633622):0.017269293):0.037723554,((c6070:0.705307245,((((c1193:0.424996824,c6061:0.527488310):0.110188295,((c6055:0.295372051,c6058:0.343358907):0.066859753,(c3992:0.418653698,c6064:0.295993800):0.088956230):0.053785868):0.048930800,(c6059:0.206514094,(c3319:0.342602045,c6062:0.444783751):0.081113572):0.182495619):0.067974881,c6013:0.464866432):0.142879322):0.175633349,(((c6063:0.371803241,c6067:0.394785127):0.124600836,((c3743:0.567488015,(c2567:0.773202912,c6069:0.509334264):0.044582499):0.086455021,c3727:0.419524866):0.075432313):0.047810215,(((((c1974:0.305544132,(c2815:0.158298344,c3626:0.475092236):0.452236905):0.033110198,(c692:0.359072620,(((c6082:0.280385947,(c1208:0.438324809,(c3994:0.727532958,c6314:0.143410792):0.166227887):0.059536708):0.059393668,(c6083:0.324967176,c6081:0.222689399):0.046759992):0.091364840,c3686:0.388945973):0.050975483):0.025396615):0.055910125,(c442:0.243621240,c1068:0.590717064):0.208572354):0.032730288,(((c5622:0.335258109,c5709:0.740149036):0.110736647,(c4540:0.456536909,(c818:0.413766112,c4945:0.462356958):0.276114181):0.162479017):0.073438342,(c5172:0.368956410,c3840:0.370652215):0.100723864):0.033903322):0.040345131,((((c6065:0.362479560,c6066:0.402880869):0.081033702,(c2107:0.601954113,c5892:1.487740693):0.339819385):0.055704790,(((c2233:0.403972364,(c6060:0.405302728,c6068:0.333581595):0.134778737):0.047418392,(c901:0.237548305,c5009:0.514903288):0.082438178):0.050314254,c6056:0.294831666):0.127297675):0.026288404,(((c2086:0.728655592,c549:0.629396582):0.329173785,c4979:0.209300919):0.079176794,((c5560:0.198896534,c5575:0.887406980):0.852522204,c1826:0.177842519):0.146875332):0.194876462):0.097875546):0.042150943):0.201336033):0.231497483):0.045488388):0.045717535):0.013523388):0.017986421,(((c1315:0.518411025,c2685:0.249120053):0.175172821,((((c1823:0.138449584,c1912:0.000000005):0.695099685,(c5597:0.000000005,c5598:0.000000005):1.299624697):0.256875771,(((((c2715:0.499120452,c3484:0.588793105):0.201106395,c2737:0.477621302):0.077817382,c1800:0.481817742):0.180489477,(c2421:0.543513537,(c2738:0.462239026,c4245:0.585007467):0.183884614):0.222996456):0.405945271,(c3521:1.215722633,(c1951:0.876951599,(c2684:0.640844531,c3361:0.943578145):0.284790334):0.191382600):0.133604898):0.084087067):0.041664238,(c962:0.375124679,c4911:0.478388991):0.143360328):0.025994427):0.076012980,(((c1874:0.760365969,(c1964:0.471112351,c2304:0.511935906):0.468277448):0.378200806,(c1041:1.469598909,(c1398:0.197257541,(c5962:0.000000005,c3160:0.932861908):0.310546945):0.247475776):0.418735783):0.254642364,(c5914:0.789378896,(c6225:0.638396374,(c1799:0.000000006,c6256:0.085621426):0.359419303):0.174453719):0.172844872):0.076368476):0.011234722):0.009577079):0.015098381,(((((((((((((c331:0.225541716,(c11:0.169216277,(c5797:0.000000005,(c163:0.002764309,c9:0.003044145):0.000000005):0.245437717):0.025655081):0.031787376,(((c25:0.209584934,(c66:0.064872868,(c33:0.066924108,c6609:0.134663508):0.024548148):0.029537600):0.064577453,(c3397:0.168168293,c203:0.147010627):0.016664838):0.043702059,c271:0.151509373):0.055997715):0.023918650,((c6608:0.007708972,(c54:0.000000005,(c6580:0.000000005,c235:0.003432248):0.000000005):0.010243689):0.024271683,(c6617:0.049787915,(c133:0.010514711,c134:0.006637012):0.030745034):0.037244415):0.183849632):0.056263560,((c6471:0.121800329,((c94:0.002855833,(c93:0.000000005,c95:0.000000005):0.002863304):0.020323398,(c92:0.003178782,((c99:0.004382641,c101:0.015837171):0.007570132,(c100:0.000000006,((c6354:0.016895844,(c97:0.000000005,c96:0.043635888):0.000000005):0.008505389,c98:0.002800893):0.019884009):0.006503022):0.030165265):0.024177169):0.118926630):0.120103072,c105:0.269607837):0.036029222):0.135599064,((c6474:0.040941073,(c7:0.057128054,(c8:0.000000005,c6555:0.000000005):0.030994188):0.033610435):0.228658257,(c4600:0.161347725,c6425:0.307062202):0.105337302):0.227585797):0.058492535,(c5790:0.416887846,(((c6345:0.000000005,(c248:0.000000005,c6380:0.012668283):0.000000005):0.000000005,c6377:0.036519897):0.337627689,((c6619:0.292043674,c88:0.498993017):0.170571663,(((c4148:0.210012779,(c3331:0.212429452,c4159:0.206957013):0.062433444):0.094861154,((c1994:0.178732060,((c1938:0.000000005,c4275:0.009377253):0.132709285,((c6574:0.112019242,((c112:0.000000005,c289:0.000000005):0.017581485,(c171:0.000000005,(c18:0.000000005,c6657:0.000000005):0.000000005):0.036225753):0.070186077):0.092566717,(c4807:0.021556946,c4822:0.000000005):0.138438791):0.063650430):0.084170293):0.214010847,(((((c1092:0.120008204,(c3364:0.034267541,(c3078:0.081393069,(c247:0.0,c3362:0.0):0.088815831):0.026185352):0.016620958):0.115123028,(c3004:0.171774518,c6411:0.135270325):0.101210430):0.053388830,((c3369:0.0,c3370:0.0):0.235951914,(c6622:0.151957617,(c4307:0.186011940,c6397:0.157637597):0.052678938):0.035806511):0.034521016):0.058008794,(c2932:0.121016235,c3149:0.149424296):0.163468991):0.076439305,(((c6472:0.0,c880:0.0):0.000000005,c6051:0.017078142):0.100336143,(c512:0.079922887,c960:0.114809585):0.049940270):0.141751126):0.047569035):0.044251383):0.040604274,c4015:0.326090835):0.042503553):0.032136795):0.141906340):0.045957789):0.027367468,(((c323:0.064253322,(c6466:0.019393132,(((c6376:0.000000005,c350:0.019878169):0.000000005,c6666:0.000000005):0.000000005,c6544:0.000000005):0.024481734):0.095228634):0.131577938,((c237:0.002977420,(c190:0.000000006,c2470:0.754774941):0.238505689):0.016174178,c189:0.010998144):0.290565949):0.159037651,((c21:0.022645565,c46:0.000000005):0.180892205,((((c37:0.017890351,(c148:0.000000005,(c38:0.000000006,(c39:0.0,c149:0.0):0.000000005):0.002838399):0.007896645):0.122263823,(c3334:0.077685839,(c6438:0.002828564,(c6441:0.000000005,((c6439:0.0,c6440:0.0):0.000000005,(c364:0.000000005,c6614:0.000000005):0.000000005):0.000000005):0.000000005):0.085786434):0.028986025):0.046794781,(c6511:0.091137335,(c49:0.000000005,(c6496:0.0,c6497:0.0):0.004974527):0.098459730):0.032876989):0.049631027,(c6671:0.005569959,(c6447:0.000000005,c6672:0.000000005):0.002947802):0.093478566):0.172680214):0.245157378):0.076098723):0.028413981,((c196:0.290054065,((((c115:0.017667242,c304:0.008716031):0.174580762,((c126:0.186711221,(c315:0.231010002,c6567:0.227684486):0.095781266):0.014244740,((c13:0.140202489,(c6494:0.081727723,(c201:0.089257971,(c6590:0.005609446,c6591:0.000000005):0.090827858):0.029100922):0.043923311):0.034229820,((((c2746:0.032258365,((((c6582:0.047143764,c6448:0.097303724):0.012137639,c6646:0.048549276):0.004554589,c6353:0.033044553):0.009715726,c223:0.044325759):0.010624315):0.014040630,((c300:0.000000005,(c74:0.000000005,c6592:0.000000005):0.000000005):0.044676768,((c6598:0.044543147,c6599:0.040590981):0.020363846,(c6647:0.000000005,c6648:0.000000005):0.028729479):0.008617054):0.024966024):0.088900043,(c6651:0.111995069,c6483:0.211029225):0.031894152):0.028718270,(((c14:0.0,c15:0.0):0.140696114,c5493:0.101410676):0.082482289,(c145:0.000000005,c260:0.000000006):0.217333312):0.018360653):0.023589823):0.015562362):0.045863557):0.051121475,((c175:0.003517669,c202:0.000000005):0.139452431,(c6649:0.000000005,c6650:0.000000005):0.123953320):0.078818896):0.229673966,((((((c85:0.204088423,((c6469:0.029827304,c6473:0.035827426):0.125866934,((c19:0.006855461,(c6514:0.010390046,c6427:0.003365033):0.006775511):0.074610014,(((c6600:0.021868087,(c6612:0.034342498,c6601:0.019575254):0.014952681):0.023008875,(c318:0.009336864,c6611:0.000000005):0.043600908):0.024135938,c6429:0.022149054):0.040118309):0.085037482):0.030765696):0.032944889,(c71:0.102680971,c296:0.132213321):0.102798493):0.018086508,((c6579:0.047427627,(c6578:0.014247582,c6610:0.005907887):0.043641660):0.135026331,((c79:0.051840037,c363:0.042995939):0.063020043,((c197:0.052090664,c6434:0.030536258):0.123502287,(c6400:0.051756733,(c307:0.000000005,c6463:0.000000005):0.032884096):0.047577989):0.064479657):0.122173399):0.047513123):0.034669479,((c249:0.239212372,(c0:0.160353729,c215:0.133891499):0.075020011):0.036304265,(((c2:0.000000005,c272:0.006098442):0.048421162,(c3:0.002815155,c6549:0.000000006):0.051410857):0.175271393,c355:0.281146022):0.049425160):0.032855953):0.058023836,((c188:0.439139837,c6553:0.000000012):0.222187691,(c6583:0.003016724,(c6584:0.000000005,c6585:0.005560911):0.000000005):0.287645419):0.051744575):0.052499003,(c6455:0.237488569,((c273:0.054569917,(c274:0.000000005,c275:0.002724851):0.002386855):0.047298308,((c270:0.039927652,(c57:0.000000005,c314:0.000000005):0.063511398):0.034423588,(((c283:0.000000005,c6669:0.014768836):0.095506247,(((c187:0.000000005,(c277:0.000000005,c278:0.000000005):0.000000005):0.003453259,c245:0.000000005):0.041229400,((c6564:0.002810591,(c282:0.000000005,(c279:0.000000005,(c280:0.002786185,c281:0.000000005):0.005571010):0.002778732):0.002794755):0.000000005,c6607:0.000000005):0.045869883):0.012390954):0.015538131,(c276:0.005432447,c6670:0.181798128):0.066303682):0.026252753):0.031213644):0.243956788):0.184996529):0.055578879):0.019103556):0.025962836,((c6461:0.140510689,c6645:0.140788460):0.187415610,(c316:0.281984389,(c199:0.123339095,c358:0.158343956):0.122264505):0.079779152):0.077006185):0.041431693):0.063205706,((c6621:0.543991287,(c6550:0.086032581,(c2080:0.002932849,(c6545:0.000000005,(c6546:0.000000005,((c6443:0.000000006,c359:0.002820953):0.000000005,c6547:0.000000005):0.000000005):0.002734809):0.013745806):0.052209096):0.361812134):0.066359405,(((c5068:0.0,c5069:0.0):0.008511212,c5070:0.000000005):0.347602479,((c6388:0.000000005,(c6552:0.002900645,c6551:0.000000005):0.000000005):0.089620329,(c147:0.032510029,(c125:0.061388671,c146:0.112917324):0.055419126):0.067051166):0.404453582):0.144042728):0.079751118):0.068834339,((c2082:0.023996091,c3534:0.042547197):0.379940418,(c1237:0.280560258,((c4457:0.002956552,c4458:0.000000005):0.378463411,(c891:0.205143009,c1811:0.151655651):0.159337049):0.051471660):0.068228203):0.096852372):0.188848086,((((((c2105:0.533892629,c1316:1.501008388):0.160154570,(((c849:0.890921609,c5016:1.033351802):0.146966369,(c5027:0.921530011,c2446:0.791144087):0.371866785):0.114088120,(c975:0.000000005,c6303:0.000000005):1.647743771):0.140851891):0.024014032,(c1908:0.954078708,((c266:0.447989236,(c1919:0.487486953,(c1972:0.834222300,c4319:0.801566980):0.379476499):0.131503789):0.103541069,(c3169:0.979214046,c4141:0.502734251):0.283765240):0.061498495):0.071522627):0.034408564,(((c34:0.000000005,c1329:0.414781251):0.592054691,(c1311:0.132658621,c1632:0.533689067):0.530705449):0.066786311,c3520:1.117115079):0.118466040):0.046755254,(((c3116:0.840967525,c5216:0.000000012):0.624412264,(c6261:0.296210044,c2728:1.020633326):0.105751692):0.130100519,((c3350:0.731411221,c1199:1.025748093):0.148345779,(((c1790:1.438434440,((c517:0.956321686,((((c3633:1.084607317,c5929:0.392072524):0.247285108,c3128:0.276473408):0.112047812,c1082:0.893721732):0.219795224,c84:1.170060359):0.000000005):0.168776264,((c561:0.831027715,(c1722:1.200592843,c3483:0.000000005):0.656075820):0.489835343,(c1097:0.776155266,c2001:0.573558593):0.228875761):0.251725254):0.000000006):0.072119246,(c5699:1.461918154,c842:0.031717863):0.114118241):0.086152142,c4998:1.152586399):0.000000005):0.059323144):0.109351918):0.007897134,((((c3455:1.174530328,((c1510:0.331859205,c4246:0.000000005):0.619158828,(((c186:0.332278865,c3013:1.325412359):0.391498787,(c2182:0.756076823,(c3072:0.923927769,(c5646:0.690248023,c4116:0.407345834):0.177553122):0.306951161):0.257486171):0.144702996,(c3140:1.049954979,c5936:0.744930583):0.146111550):0.107885816):0.070184382):0.036782294,((((c3628:0.582959537,c3464:0.720805029):0.078304923,((c2046:0.445723387,(c871:0.304030309,c1872:0.517803440):0.054769078):0.119248486,c2229:1.254907082):0.044133569):0.050128075,(c2435:0.402926421,c177:0.571964017):0.272967025):0.025945718,((c709:0.659255139,(c3827:0.877730028,c4169:0.253817332):0.145894186):0.090982251,(c2448:0.395159708,c2657:1.015631259):0.820836275):0.225741281):0.069931719):0.004069757,((c1497:0.204661850,(c5824:0.106706586,c5945:0.211435061):2.361174004):0.994007031,((c2683:0.546011814,(c1406:0.325392315,c2328:0.529870031):0.100112575):0.299797423,(c1026:0.481653481,c4833:0.809501652):0.164115811):0.207792501):0.287402302):0.037074927,((c1999:1.187632560,(c6043:1.044427887,((c1714:0.699336092,(c5051:0.523141218,((c3687:0.461220464,(c1412:0.385650435,c5342:0.420602887):0.078011973):0.126293398,(c1331:0.362635656,c3739:0.570059142):0.108999122):0.267269222):0.141337422):0.221974272,(c5509:0.746428250,((c701:0.000000005,c4449:0.000000005):0.628972095,(c1013:0.853714827,c5795:0.653025179):0.129553693):0.101367508):0.133545088):0.054047686):0.017029105):0.024679927,(((((c3591:1.181477874,(c1622:0.484322788,c3152:0.682673438):0.635053357):0.098556757,(c2458:0.495305536,c3269:0.298890657):0.817639164):0.105583418,(c1612:0.731668788,c3584:1.128551937):0.408943434):0.000000005,(c4731:0.514275263,c5105:0.379514793):0.465996905):0.113712179,(c2875:1.250326505,((c4981:1.004744150,(c1088:0.425454224,(c1917:0.220458361,c2647:0.321935236):0.397797527):0.183584722):0.136838439,(c3637:0.715796068,((c1751:0.312023990,c3554:0.497859498):0.289190334,(((c648:0.598157672,c1895:0.427956490):0.106521869,(c2753:0.587490139,c2165:0.705060886):0.094497626):0.067495612,((c1547:0.317500572,c3500:0.091959527):0.381694519,(c6049:0.433062416,(c6052:0.309104064,c6054:0.336152364):0.139858284):0.093273026):0.061691242):0.067495828):0.097131059):0.070710148):0.044119963):0.072881359):0.049267156):0.036785864):0.039921559):0.007141025):0.023693834,(((((c4620:0.819460726,((c2595:0.527453914,c3291:0.508917564):0.145913512,(c3341:0.667767685,(c3383:0.667446814,c4342:0.574564699):0.429501225):0.184393852):0.146651941):0.000000005,((c6502:0.266554300,((c6421:0.0,c6422:0.0):0.006092307,(c6419:0.000000005,c6420:0.003115412):0.000000005):0.319272918):0.302491099,(c5889:0.424707194,(c1149:0.219757202,c3508:0.411476711):0.201520744):0.093376335):0.049532253):0.064144889,((((((((c1508:0.526931919,c4054:0.285977168):0.251597197,c726:0.473322365):0.111134753,((c1270:0.291577872,c2039:0.275806430):0.097330522,(c889:0.393701666,c1879:0.420628489):0.039799345):0.043347643):0.079200327,((((c2426:0.278950098,c6330:0.368209858):0.142595179,((c4294:0.403631392,(c1134:0.319273925,c3539:0.302584320):0.078211566):0.341302044,((c769:0.413386650,c5734:0.372601873):0.095671279,((c1196:0.249165092,c1234:0.570289446):0.153024125,(((c762:0.360879438,(c1969:0.321842270,c4301:0.382045304):0.126665019):0.073040921,(c3450:0.307744960,c5895:0.541608901):0.037040728):0.068769582,(c917:0.428621816,c5545:0.446744767):0.139687574):0.062807601):0.025467305):0.078160121):0.049107940):0.040315700,(c647:0.350294569,c6383:0.407987476):0.140865606):0.042266039,((c1014:0.332057397,c1481:0.109253742):0.412417712,(c1902:0.424137024,(c1008:0.315339083,c1244:0.378483976):0.069041340):0.062378563):0.065576626):0.055754706):0.059099861,((((c211:0.136409005,c6394:0.175499176):0.307052501,(c1928:0.256007936,(c5901:0.401341803,c4426:0.400550890):0.078849222):0.060124325):0.206840681,(c2731:0.381553240,(((c3263:0.396265211,c3540:0.422581303):0.251672370,(c2391:0.444414542,(c3115:0.202889592,(c1050:0.269205416,c2394:0.233269485):0.000000005):0.171768284):0.053091308):0.085350747,((c656:0.350301185,(c4781:0.474965750,c6504:0.137597450):0.223519421):0.223336031,(c2723:0.602371806,c1430:0.305922933):0.065581250):0.095079615):0.107784552):0.127294347):0.142337488,(c645:0.574120418,(c3200:0.399864413,c4817:0.271403074):0.226249484):0.287938626):0.054980181):0.044773603,c3530:0.613849439):0.040033072,((c887:0.512685269,(c3375:0.551864474,(c2002:0.496074812,c5116:0.264159816):0.152873128):0.066644583):0.126703168,(c1470:0.424444197,(c1715:0.499724806,c5079:0.347486790):0.088501368):0.091459559):0.229248019):0.038476487,(((c5095:0.559284362,(c6541:0.418684841,(c6077:0.084835497,c6668:0.039283810):0.302503986):0.034682301):0.053873591,((c5655:0.417520728,(c1179:0.376783214,c3599:0.378061278):0.031651974):0.175678325,((((c1813:0.402947083,(c1074:0.603457562,c3323:0.345764418):0.091216630):0.065547665,((c5857:0.000000005,c6464:0.005365508):0.283672053,c3262:0.318538733):0.134596136):0.089142495,(c3230:0.447644087,(c4500:0.243371612,(c5820:0.529164209,c5161:0.213544044):0.053543371):0.053348859):0.044247113):0.030754125,((((c2476:0.355107274,c2736:0.274097383):0.154375061,((c1454:0.014674689,c4065:0.030512968):0.455396295,c4961:0.431770261):0.052389168):0.095986154,(c1248:0.368814255,c1764:0.255104898):0.043195332):0.061810472,c3217:0.331655047):0.023518316):0.031122085):0.045725918):0.065440825,((((((c3127:0.465238367,(c1211:0.243542358,c4932:0.371997868):0.101955313):0.106819015,((c2265:0.422192791,(c4790:0.476413552,((c2427:0.239748338,c3091:0.211732796):0.222087149,(c5006:0.351532753,(c4094:0.369604831,(c1716:0.270013525,c2431:0.408949935):0.085936449):0.075118358):0.096914173):0.091530778):0.032925530):0.067402194,(c2689:0.411126363,c5876:0.577947346):0.118794907):0.042372882):0.079513752,(((((c2762:0.300028569,c6616:0.407031743):0.176354337,c6412:0.338273840):0.052802605,((((c205:0.191206925,(c1414:0.068156021,c4385:0.077905870):0.205890856):0.041094235,c2122:0.335194787):0.053311440,c1125:0.303734295):0.094745907,(c1815:0.346532015,(c2580:0.357098945,c3045:0.348924925):0.074500663):0.051748206):0.057440636):0.027667724,((c2796:0.344555418,(c518:0.131806865,c3713:0.307262729):0.056716837):0.175466977,(c2592:0.266428396,c6395:0.242438097):0.142370032):0.068111650):0.062595267,(((c1786:0.468917777,(c3135:0.903665627,c5662:0.164065264):0.247980812):0.056288736,c392:0.441518800):0.057697894,(((((c4504:0.374841919,(c2323:0.387456191,c4756:0.297824474):0.226029329):0.028824108,(c4142:0.348219555,(c2668:0.456948308,((c409:0.651335234,c4074:0.185957866):0.185905698,c5875:0.332903268):0.068670812):0.095324530):0.051645766):0.048590631,((c2942:0.465487029,(c2628:0.240790745,(c1608:0.341512066,c3150:0.329714890):0.030251505):0.061564651):0.102449461,(c5479:0.426140310,((c1060:0.244809658,c2432:0.274284344):0.259273189,((c1737:0.197208361,c2734:0.356361129):0.091551022,((c1755:0.429402438,c3112:0.108105353):0.211814838,(c4574:0.367098625,c6029:0.262368088):0.139736910):0.037312348):0.070521471):0.049871248):0.042334565):0.042674657):0.075685849,(((c3982:0.315547394,c6534:0.287240247):0.128718876,(c2627:0.389309855,(c4969:0.321465783,c4263:0.391849861):0.066579910):0.080689548):0.041317922,(c2554:0.306507969,c5897:0.355485351):0.276955834):0.070040261):0.044208353,(((c2679:0.353508547,c5881:0.411895655):0.069916465,(c5503:0.380436133,((c4258:0.169201291,c6023:0.294619210):0.105899678,(c4358:0.361957443,c5460:0.383046173):0.052337786):0.039429645):0.041187782):0.031555610,(c4520:0.379909460,(c2733:0.372787521,(c3502:0.432952469,c3365:0.473379620):0.068638784):0.098257832):0.074181402):0.042904844):0.029619200):0.031581636):0.052456849):0.021442266,(((((c6014:0.288984467,(c5768:0.152688253,c5517:0.378503024):0.169643243):0.156081831,(c5765:0.314020462,(c5202:0.172132199,(c3114:0.247610611,c5480:0.221848830):0.117639898):0.089413726):0.067677862):0.051167757,((c3499:0.466338944,(c2903:0.256610567,c4554:0.299103076):0.065720381):0.079402071,(c5203:0.336793895,c5204:0.321262088):0.110425624):0.052462658):0.052862141,(c1506:0.399575210,c1546:0.301760940):0.156451325):0.108224788,((((c441:0.420279901,((c2031:0.393268609,c5255:0.417172971):0.082628989,c4761:0.261477587):0.043447378):0.033097988,(c633:0.177304704,c6624:0.294661253):0.138492229):0.068146078,c6034:0.562598045):0.046330346,((((c209:0.063743615,(c208:0.006099345,(c35:0.011680570,c56:0.016884265):0.002842010):0.051817650):0.072345646,(c210:0.119167528,(c342:0.000000005,c6632:0.000000005):0.090402958):0.029917311):0.200706868,((((c305:0.074039813,(c6356:0.000000005,c6433:0.000000005):0.087387762):0.106224281,(c6627:0.275712593,((c6631:0.143096548,(c6630:0.129460545,((c140:0.040065852,((c6416:0.004631908,c6523:0.000000005):0.004854726,(c233:0.000000005,c6363:0.007765853):0.034510854):0.034120541):0.055713219,((c141:0.000000005,(c142:0.0,c143:0.0):0.002731149):0.127504783,(c6628:0.002762961,c6629:0.000000005):0.095750778):0.043212123):0.023750392):0.024249653):0.066561642,(c139:0.221657265,(c135:0.172773173,((c136:0.0,c137:0.0):0.186613816,(c144:0.094712775,(c6452:0.000000005,c6636:0.008042383):0.074997085):0.074286616):0.033014215):0.031043808):0.058245509):0.036480417):0.027293039):0.017614705,((c86:0.000000005,c6431:0.000000005):0.183355566,(c138:0.001912368,c6426:0.006400316):0.136314936):0.083023815):0.034812531,(c351:0.003759643,c6432:0.003934721):0.277596965):0.050536937):0.043929520,(c2128:0.263711946,c603:0.239482008):0.048814739):0.063601045):0.035316699):0.025237815):0.080621465,((((((c1545:0.299116175,(((c1327:0.152886241,(c2690:0.284370684,c6409:0.151012381):0.075162158):0.084917964,(c4602:0.176223015,c285:0.322600669):0.101046119):0.093594464,(c1271:0.300687622,c919:0.445697406):0.075888919):0.059835173):0.121098219,(c2467:0.525282901,(c3646:0.546572378,c5124:0.573179200):0.082379774):0.027776918):0.041814197,(((c4896:0.364858676,(c952:0.278270027,c6311:0.501306413):0.082415046):0.053266796,c5569:0.641364246):0.112373544,(c1870:0.412663428,c6290:0.475111763):0.134308835):0.121383507):0.018292681,(((((c5836:0.345084161,c1439:0.327268838):0.043683203,(c1340:0.329947654,c1108:0.373849097):0.096871033):0.288414852,(((c1852:0.262963295,c1217:0.359203062):0.088583842,((c1502:0.502915252,c5045:0.348470001):0.160946286,(c1858:0.269258288,c5766:0.435089703):0.093825521):0.074198897):0.073050696,((((((c2608:0.390388278,c6090:0.478376403):0.046694102,(c1827:0.356614529,c1356:0.303701161):0.041212921):0.039890015,(c5475:0.391068824,(c5502:0.349936949,(c2579:0.000000005,c2610:0.000000005):0.267466439):0.085987620):0.079090398):0.049383028,c4312:0.280676201):0.198860842,((c3535:0.500823277,(c2144:0.443610590,c2975:0.320193075):0.175321258):0.110523674,((c4872:0.592491157,(c1921:0.445589505,c4765:0.631924243):0.100130106):0.104062931,((((((c1724:0.383465183,(c454:0.463963845,c4837:0.568009749):0.064577575):0.069171196,((c1098:0.425771130,c5089:0.468074163):0.179367886,((c1564:0.299765726,(c398:0.482201520,c2101:0.292395696):0.123558352):0.046480371,c2123:0.416195618):0.057846232):0.118906364):0.100065200,c5272:0.450877794):0.042951689,((((((c1424:0.616089988,c3311:0.385464705):0.041751390,(c4299:0.432718821,(c1095:0.388166265,c1109:0.407849526):0.109646855):0.062119465):0.054925735,c2145:0.394415708):0.068011143,((c1106:0.359839268,c1583:0.435538936):0.056275597,((c2071:0.306949886,c1218:0.381691504):0.056203817,c3644:0.310585732):0.050779499):0.020101432):0.037288864,(c1075:0.349845420,(c539:0.338797245,c1283:0.386813991):0.118660712):0.078498940):0.009907906,(c2148:0.517256597,(c2100:0.390781265,c3205:0.587612972):0.124712118):0.077098805):0.029761037):0.029086088,((c4543:0.448558150,(c1326:0.401609033,c1336:0.395660783):0.186546158):0.075495471,(c1309:0.518623008,(c2471:0.601501971,c4003:0.356948012):0.102818565):0.085081361):0.020969668):0.087260167,((c4091:0.328279986,(c4877:0.341341110,c5903:0.434939948):0.087928105):0.102957361,(c267:0.417074996,c1761:0.525120283):0.070748549):0.059946574):0.099532663):0.066632359):0.060428319):0.045449805,(c5261:0.457794890,(c1087:0.257489266,c5446:0.284238336):0.365610833):0.090535574):0.094215444):0.062352360):0.046314300,((c4509:0.402541287,((c1415:0.337191030,c5173:0.232998796):0.087623733,(c3616:0.344822353,c6265:0.494906797):0.079504130):0.037861262):0.050210873,((c4362:0.487554491,(c4134:0.448024601,c4614:0.329364018):0.108901038):0.113139957,((c1382:0.415315762,c1607:0.397395705):0.136217416,(c3428:0.357342226,((c1173:0.299965577,c3562:0.301565988):0.120116757,c1228:0.302485693):0.054343615):0.089911737):0.065599217):0.061176860):0.036423124):0.033794933,(((c1443:0.487937223,((c2890:0.950005164,c6004:0.000000023):0.288496346,(c470:0.431513992,(c5807:0.000000016,c1561:0.635507334):0.298169004):0.225358305):0.099406180):0.081386321,((((c6022:0.262831219,((c1767:0.270298426,c2214:0.000000007):0.405567855,c4419:0.324628260):0.078645784):0.072704948,(c2578:0.465384791,c1338:0.345961880):0.066165535):0.079949644,c4826:0.393385686):0.083019376,((c4788:0.412555761,(((c3634:0.108561937,c2548:0.270020656):0.075677013,((c4856:0.360372626,(c5696:0.451501130,c1775:0.297285267):0.082452540):0.078818296,c3635:0.356733451):0.032087768):0.094556738,(c860:0.359514566,c1091:0.292821688):0.132572369):0.059794049):0.130952098,(c1606:0.223498806,c4898:0.206627132):0.346444901):0.078783017):0.023236448):0.046855385,((c1308:0.394794406,(c204:0.393536252,(c3548:0.461440886,c4914:0.284872145):0.190599772):0.111056134):0.067602844,(c3546:0.522613978,c5110:0.484583167):0.156203172):0.053616233):0.030648272):0.037097774):0.044884804,((((c3641:0.572848345,(c1776:0.363157544,c2222:0.704021387):0.099468251):0.100271768,((c2598:0.421081647,(c2276:0.335722510,(c2252:0.408104363,c3251:0.367384244):0.088261329):0.140718702):0.201462359,(c2678:0.432227672,c6000:0.413165861):0.069639467):0.059618966):0.052829463,(((c2255:0.393829179,(c5064:0.469591588,c5508:0.414749063):0.085460244):0.066818865,(c3665:0.040262965,c6331:0.069722010):0.433110573):0.044831473,((c401:0.331271815,c6310:0.546659173):0.092315601,(c4539:0.365490107,c1806:1.507547713):0.123745191):0.108960415):0.076015989):0.043830775,(c2494:0.470917074,(((((c4098:0.435219506,((c2033:0.467415387,(c3910:0.364921066,c3977:0.302898440):0.075122440):0.090939947,((c4365:0.449922410,(c2865:0.442171264,c2553:0.461584816):0.100457070):0.030172992,(((c1810:0.300320927,c2978:0.263158141):0.066572497,c6282:0.428568775):0.067776903,c2680:0.368999890):0.063126231):0.026160183):0.008821896):0.033592659,c4211:0.481187173):0.041570453,(c855:0.440383727,c303:0.492995393):0.093912002):0.035744698,((c2649:0.302066593,(c1181:0.507959092,((c1488:0.787720634,c5459:0.659579153):0.129499996,c3218:0.255341881):0.169209636):0.073710606):0.050966307,(c4874:0.396132419,(c2477:0.297590775,c2190:0.305987125):0.040085102):0.076540100):0.043091573):0.026674162,((c4297:0.308600095,c5880:0.299515887):0.060861308,(c632:0.594677200,c234:1.352322902):0.127962862):0.113230945):0.030652149):0.054225092):0.126915585):0.022431765,(((c91:0.222766427,c176:0.285070499):0.272765705,(((c3317:0.551710390,((c618:0.249368274,c1295:0.495691964):0.121491019,(c636:0.223491241,c3504:0.335425895):0.165186616):0.068773489):0.050042872,(c4784:0.400967548,(c1906:1.615653507,(c1544:0.201889948,c4741:0.259480562):0.192575973):0.010976442):0.135204039):0.057896235,((c988:0.023248737,(c2977:0.000000005,c4601:0.008066090):0.067602301):0.121375017,(c1734:0.148519953,c5034:0.088734555):0.063024137):0.246534298):0.051708263):0.042997565,(c4433:0.484949540,(c2973:0.429394480,((c4857:0.292880392,(c5524:0.204098932,c6260:0.329385217):0.058397624):0.219756870,((c2308:0.387761131,c4404:0.591693454):0.704177325,(c182:0.000000005,c6562:0.162601180):0.354929354):0.057032047):0.133434101):0.059621037):0.082319705):0.140861183):0.010132049):0.034409415,(((((c1240:0.476499595,c3215:0.260039747):0.218396396,c1830:0.460487700):0.111685020,(c6372:0.362521408,(c3528:0.423064882,(c103:0.296170094,c161:0.274061148):0.209232755):0.071128442):0.107283848):0.068051497,(((c6041:0.387164203,(c3744:0.016776509,c6470:0.000000005):0.400501038):0.180221323,(c6294:0.488679621,(c5153:0.397907446,(c2129:0.000000012,c1588:1.372655487):0.475494185):0.154084915):0.050011801):0.035176074,(((c6563:0.160598062,c6602:0.216662077):0.140819283,(((c6560:0.000000005,(c6430:0.000000005,c6561:0.000000005):0.003124780):0.040976339,(c162:0.006690692,c268:0.131464670):0.032379706):0.211896914,((c114:0.000000005,c6559:0.026204856):0.189619931,c6279:0.256068273):0.050940675):0.074357319):0.189600978,c402:1.874141201):0.000000009):0.041582483):0.026748828,((((c2393:0.494731261,c6296:0.280797278):0.180245479,(c5799:0.575825049,(c4689:0.404936337,((c48:0.382488036,c3052:0.451022872):0.183193514,(c2564:0.449649519,c4610:0.451621297):0.088650007):0.071287350):0.013472301):0.054312801):0.022713019,(c5107:0.296648301,c6078:0.478965157):0.085800810):0.027546239,((((c4316:1.040973160,c5538:0.441912329):0.146354981,(((c1639:0.567457746,(((((c325:0.394175288,c4873:0.492121014):0.250102001,(c185:0.346423476,c2566:0.579409394):0.141593059):0.183816790,c2551:0.574940872):0.078790406,((c1069:0.368102543,c1996:0.499280635):0.103075545,((c1475:0.314331687,c3237:0.191975050):0.192932561,(c2262:0.257219488,c3368:0.409694604):0.060721085):0.074577566):0.128573219):0.065589245,(c1090:0.470485772,c2465:0.285942913):0.062988323):0.051996357):0.060746089,(c3283:0.282994269,c6076:0.306051751):0.218069352):0.061291215,c1857:0.481228192):0.104394633):0.053518159,((c5477:0.634633993,(c3312:0.269922711,c2525:0.320438042):0.525539009):0.095518662,c5711:0.457595066):0.172119501):0.057068754,(((((c1853:0.490347234,c2714:0.449903161):0.155507608,((c2652:0.323452584,c2867:0.421730043):0.177953710,((c3511:0.523966096,c1458:0.672051474):0.077196980,c4738:0.587708755):0.022703554):0.050855145):0.071603990,(c1554:0.267576690,c3717:0.434241269):0.140633749):0.029056154,(((c2701:0.409209055,(c780:0.321845339,c2888:0.275266770):0.077621186):0.048043941,((c1941:0.287879981,c2042:0.484695037):0.049838540,c4846:0.281983884):0.059326209):0.041019426,(((c832:0.439696126,c430:0.392017071):0.112536913,(c6050:0.440548876,(c532:0.194680181,(c3003:0.060702085,c3822:0.000000009):0.351476963):0.196683572):0.149271787):0.022105263,((c6323:0.263459543,c2056:0.403163631):0.111772118,((c1757:0.323208118,c3325:0.452205254):0.051059131,(c912:0.413501657,c5073:0.265103174):0.092761061):0.069753997):0.113148021):0.042647762):0.063421524):0.044095927,((c2380:0.283010944,c2455:0.556606059):0.059993313,c5523:0.407042517):0.051786357):0.037002013):0.021817567):0.020152363):0.025735477):0.034925315):0.028584458):0.019586355):0.014739717,(((c1851:1.015473371,c4810:0.662476784):0.125148993,((c1158:1.557209888,(c3932:0.606566246,c3937:0.579199289):0.341549184):0.240064376,c5436:0.407326910):0.126248609):0.096097232,(c6664:0.310783036,(c1940:0.309556033,c2727:1.059073094):0.233502704):0.123695599):0.032822832):0.029218795,(((c750:0.748992995,c5854:0.751060538):0.176934894,(c3486:1.210644649,(c42:0.281150274,c3764:0.976906325):0.000000005):0.221770575):0.324606381,(((((((c4087:0.601890855,(c817:0.855936026,(((c1886:0.000000005,c617:0.000000005):0.072066791,c933:0.067881140):0.194600078,c5566:0.629912440):0.065027805):0.098782894):0.143304777,((((c2020:1.241821168,c4187:0.304075591):1.046946458,(c4093:0.864904460,(((c4016:1.597012228,c867:0.943896688):0.000000005,c6522:0.737917808):0.220219247,c2433:1.231918605):0.000000006):0.104929291):0.113906869,c6454:0.328939986):0.066350510,c4866:0.402600884):0.078044890):0.121200272,(c700:0.555231530,(c1174:0.431277290,c4811:0.314253937):0.273781554):0.098232951):0.000000009,(c4255:1.000016778,(c2992:0.890803812,(c786:0.910874321,c1970:0.166848742):0.101735586):0.113440421):0.091499405):0.034614352,((c3092:0.549907446,(c4439:0.608202961,c4253:0.588111585):0.263916771):0.000000009,c2065:0.483904367):0.134970293):0.047806147,(((c1213:0.563177660,(c411:0.615584130,(c2766:0.332176483,c2556:0.471545512):0.110686407):0.089270058):0.117590529,((((c1076:0.504519469,c2445:0.258644187):0.065453448,c2522:0.332353734):0.074257291,(((c2044:0.016459077,c2047:0.075551463):0.168800423,(((c5373:0.000000005,c3158:0.000000005):0.308379896,(c154:0.846232738,c5608:0.152732070):0.149977980):0.084164404,(c3705:0.230368648,c5403:0.398236115):0.055838175):0.069003877):0.148624672,((c463:0.047238479,c5868:0.222867716):0.141669733,c2722:0.264382977):0.037106167):0.099222146):0.026890896,(c3222:0.467545694,(c1988:0.338925657,c5368:0.453582160):0.147628614):0.106940204):0.070937728):0.078770695,((c2023:0.812226427,(c689:0.536666689,c3086:0.856334828):0.178731787):0.106401450,c5984:0.662179632):0.060692100):0.029471774):0.041642289,((c2994:0.392967695,(c2314:0.535899441,c3145:0.243905048):0.131865934):0.403479963,((c1073:0.554111217,((c1220:0.465480554,(c481:0.482371692,c6343:0.378319750):0.242794895):0.221601243,c1235:0.538970966):0.094789308):0.129103985,(c2126:0.671101824,(c2712:0.838646642,c4605:0.046310053):0.517287872):0.434624248):0.071395156):0.081058844):0.010468894):0.031046222):0.028498873):0.034823799,(((((c1245:0.775699805,((c418:0.400478920,(c5125:0.740302875,(c686:0.206532175,c4110:0.042098467):0.002495689):0.410789617):0.275022682,((c4576:0.507414049,(c820:0.283911245,(c729:0.437698396,c527:0.454206346):0.074848672):0.039902986):0.177628211,((((c469:0.371636893,(c63:0.564359971,c807:0.370124855):0.084835051):0.141810568,(((c5043:0.331395475,(c3485:0.354607833,c924:0.527859454):0.094022687):0.078980752,c1915:0.607467339):0.059698341,(((c5159:0.498718925,((c991:0.594584455,(c3867:0.379646717,(c529:0.372726867,c2859:0.404878684):0.085905216):0.156448566):0.027067779,((c5482:0.552081041,(c788:0.481194680,c3738:0.280563543):0.071862538):0.057683127,(((c744:0.439816351,((c910:0.107059025,c2197:0.422945647):0.078309233,c610:0.426028182):0.067904578):0.065607133,c5682:0.414013073):0.067831800,c1022:0.451348708):0.094046773):0.030718862):0.050313592):0.103577754,((((c4593:0.345471326,c5772:0.507443821):0.104718044,(c5546:0.417375905,c2910:0.496413716):0.035562037):0.027292579,(c1839:0.393241303,c2103:0.325826873):0.062140890):0.069517435,(c3718:0.531996494,(c2153:0.521937559,c6117:0.580870576):0.048598956):0.068642662):0.071782100):0.024584411,c6116:0.669591112):0.041130776):0.068684217):0.055452073,((c1301:0.307043490,c1505:0.356093831):0.259489306,(((c1357:1.005658932,c5298:0.516924084):0.059831821,(c4925:0.629132149,(c911:0.364183213,c4617:0.315105281):0.080688016):0.026923953):0.019252059,(c971:0.515291323,((c746:0.321651220,(c488:0.380249345,c5645:0.194795693):0.140762314):0.089778339,c4575:0.331449498):0.221894926):0.049307759):0.064495848):0.040928032):0.059247307,c597:0.589745381):0.021306845):0.125302521):0.197466302):0.056614335,(c6637:0.617023085,((((c4984:0.188202303,(c690:0.097727620,c5720:0.171049266):0.061410950):0.594783768,((c499:0.384393098,c3553:0.539129300):0.339880319,c2585:0.843735543):0.077968836):0.101192746,(c160:0.587253333,(c4530:0.962533139,c1453:0.244721649):0.082826218):0.064745048):0.067862576,(c1138:0.664504560,(c495:0.418003692,c4150:0.342022243):0.168640125):0.272678899):0.024373374):0.028404966):0.041882157,((((c1285:0.473930462,(c1821:0.493501982,c3972:0.627453899):0.090386357):0.047673272,((((c5133:0.424623794,(c2226:0.530804375,(c3967:0.358727159,(((c3877:0.160645725,c4234:0.166799786):0.087154540,c236:0.446073436):0.044844606,(c547:0.371626234,(c1784:0.223629408,(c905:0.230741730,(c121:0.786727248,c5091:0.070519223):0.183464217):0.054805965):0.132866573):0.064248695):0.059990696):0.080692728):0.050639841):0.110693463,(((((c2130:0.437622521,c2099:0.339872733):0.073216134,(c2011:0.416742131,((c1873:0.426849184,(c2102:0.392875265,c1976:0.462646078):0.051572289):0.083524397,(c1869:0.467812116,(c1079:0.438612129,c1973:0.376427887):0.058175753):0.025007793):0.049773882):0.083403757):0.063328405,(c3124:0.567360941,(c2000:0.443172371,((c1435:0.000000005,c6325:0.622005149):0.392610249,(c2068:0.416984227,c3589:0.157047477):0.117785995):0.080237984):0.106996415):0.054519422):0.030057000,c1920:0.415571958):0.028533942,c4619:0.593390812):0.032062217):0.046693794,c571:0.554068154):0.041419577,(c3854:0.522571253,(c5055:0.256252426,(c6652:0.000000005,c6653:0.000000005):0.324626623):0.167893482):0.058809309):0.116638861):0.105447002,(c5858:0.500606662,(c3268:0.685666895,(c2717:0.498459717,c3302:0.415849443):0.153661665):0.073328315):0.078738549):0.025179426,(c5160:0.407253056,(c5154:0.762722283,c3812:0.607686682):0.080246818):0.158715106):0.038850222):0.021527771,(((((c5223:0.432414071,(c1700:0.136314908,(c4855:0.910128268,(c2864:0.442219379,(c6220:0.486226679,c4099:0.556534387):0.111210655):0.245927097):0.131874937):0.293235155):0.926689462,(c5018:1.597774848,c774:0.650236765):0.260838811):0.202953960,((c3563:1.204720130,((c3561:0.000000005,c4265:2.013656202):0.400812912,c2005:0.512002975):0.247464297):0.245073508,((((c2877:1.155188991,c4637:0.304377107):0.581300366,(c3886:0.596733973,c3565:0.400128080):0.181237618):0.636084378,(c3956:0.953293544,c5931:0.555553999):1.634412274):0.000000005,c5504:1.692636456):0.227761336):0.134516512):0.326490070,((c317:0.539659261,(c2959:0.000000009,c2990:0.000000006):0.595702453):0.287619978,(((((c1725:0.657260526,(c3046:0.327920907,(c581:0.000000006,c660:0.316928594):0.715139810):0.404051927):0.163282867,c6030:0.293774125):0.299220406,((c2912:0.609235237,c6053:0.000000005):0.540553862,c6:0.360389055):0.136839765):0.149858716,c4875:0.644629901):0.250994841,(c1195:0.162713616,c4825:0.471358809):0.473941029):0.193193491):0.022925829):0.054150991,((((c5817:0.593127646,c5192:0.687592961):0.267859529,c5208:0.883214802):0.361289516,c893:0.559529029):0.075441716,(((c231:1.662946468,(((c2092:2.076912771,(c1891:0.343823905,c4011:0.797212225):0.695333997):0.522169818,(c6401:0.212314250,c6467:0.618227258):0.805291748):0.095621782,c5349:1.642143933):0.000000005):0.248136640,c4681:1.737355048):0.072681733,(((((c1447:0.432987162,c4031:0.204734962):0.481543062,c6300:0.619401160):0.450511095,c2767:0.446587627):0.295685429,c5988:0.048580038):0.194571832,(c1178:0.220316339,(c4538:1.753726153,(c2500:1.368172689,c5660:0.000000016):0.492622065):0.230744168):0.000000005):0.273005826):0.057504057):0.031449309):0.063727395):0.034048981,(((c2634:0.632665268,(c4630:0.756408228,(c263:0.477975558,c2761:0.631026944):0.211621228):0.081239940):0.146697692,((((c2749:0.374544274,c6558:0.543798821):0.151507493,c5267:1.290379575):0.164324115,((c2073:0.356248734,c4401:0.708360831):0.088836343,c5339:0.916211582):0.110844129):0.091406402,(c4510:0.953883610,(c497:0.523253275,c2251:0.418174110):0.160435842):0.240433263):0.013610231):0.114217758,((((((((c369:0.394447215,c4953:0.545989537):0.199512054,(c4278:0.732939786,c4621:0.498551359):0.214326792):0.105673178,((c1056:0.509940882,(c1756:0.000000005,c5513:0.795454403):0.140584223):0.276384275,((c1345:0.915673271,c3600:0.401159566):0.803494549,(c4963:0.476578690,((c217:0.200843493,(c1493:0.279872839,c379:0.196696587):0.062125161):0.098997759,(c3259:0.531783264,(c218:0.294735048,c219:0.195826058):0.088466721):0.041535346):0.097959969):0.149868700):0.041168542):0.069825287):0.149626026,(c941:0.624106441,(c3395:0.976840690,((c6635:0.007716845,(c6633:0.000000006,c6634:0.015662090):0.031866666):0.557046624,c3494:0.514429686):0.133900388):0.093112134):0.044296096):0.028432969,(((c3472:0.482770480,c6299:0.267909200):0.412675041,(((c5249:0.105275096,(c5750:0.426526034,c5751:0.254811185):0.443282841):0.374732107,(c423:0.341760840,c3447:0.252444770):0.074555725):0.302053594,(c2498:0.436766159,c5908:0.369649246):0.100098500):0.271876050):0.095816772,c4220:0.888321373):0.165079438):0.026261516,(c3809:0.648827235,(c349:0.143446222,c5286:0.000000005):0.672539817):0.294282764):0.029411563,((c5648:0.871831262,c2205:0.772449138):0.202481121,(c1445:0.873838655,(c2199:0.882369669,c3203:0.693865404):0.254933235):0.089178462):0.134318714):0.011093493,(c1621:0.493583301,(c2174:0.663271637,c3657:0.447181244):0.122891613):0.203290887):0.015740783):0.044083187):0.013783156):0.027681830):0.005782617,((((((c6089:1.489551093,c3097:0.565025576):0.247672983,c1515:0.664846911):0.127889119,(((c6538:0.350037018,c3889:1.256472742):0.429272846,(c1840:1.234780282,(c1446:1.459343605,(c1641:0.561170085,(c1127:0.368648211,(c246:0.128283253,c6027:0.048066209):0.113428261):0.704944185):0.392367447):0.000000006):0.230086702):0.142743513,c4230:1.150919941):0.136181806):0.094732383,((((c4931:0.422366408,c2058:0.217827095):0.391205392,(c2017:0.612287904,((c772:0.000000005,c5647:0.515333910):0.728878814,c4423:0.000000005):0.871633194):0.144960569):0.207679953,((c4470:0.388143159,c50:0.446217482):0.082616428,c5952:1.079326813):0.166771222):0.082259939,(((((((((c4402:0.458826748,(c1798:0.619903145,c1958:0.589964886):0.134355417):0.116553421,((c731:0.626334710,c2236:1.015001886):0.113907822,c4970:1.113693667):0.625930476):0.102830998,(((c6678:0.204735048,(c3209:0.402970346,c1501:0.739157372):0.843710065):0.481548107,(c2700:0.506103124,(c1893:0.381010471,c1155:0.920593268):0.506665608):0.421936132):0.177625212,c5983:2.101964315):0.126841654):0.131401345,((c3087:0.000000009,(c4303:0.806741530,(c3894:0.000000005,c4668:0.000000006):0.000000016):0.169325217):0.486004715,((c6028:0.770739610,c1053:0.442619575):0.248645691,c1528:1.116453670):0.100935735):0.061270112):0.040015577,((((c678:0.480263683,c1979:1.640549630):0.238225437,(c4687:0.542646706,(c3061:1.033388112,c5461:0.618440640):0.073033943):0.647100628):0.184298161,((c2118:0.462389975,(c5673:0.354165082,c4151:1.165907701):0.194200111):0.208727589,(c1727:1.063568138,c6462:0.786276375):0.506470345):0.282727112):0.099423263,c1335:1.698681248):0.109643454):0.050868538,((((c2620:0.000000005,c6517:1.631826001):0.249237160,c2018:0.262001835):0.443286420,(c4629:0.855450795,(c4322:0.570559173,c6488:0.530226571):0.107520065):0.139179051):0.086296894,((c6667:0.330915909,(c1049:0.000000005,c2986:0.891927148):0.629790737):0.079567491,((c229:0.501150912,c2108:0.862027063):0.427757720,(c2925:0.692879467,c3132:0.463422841):0.621318405):0.359505652):0.082478931):0.155296714):0.060082641,((((c3654:0.583755531,c6457:0.260679158):0.178352493,c6460:0.202351107):0.550664675,(((c4936:0.807807218,c5084:1.113382283):0.118800170,((c4818:1.268089304,c2856:0.545631742):0.381615926,(c2270:0.331002626,c3240:0.995148632):0.246049799):0.174798028):0.094255352,((((c2987:0.538738896,(c886:0.163132722,c2004:0.394425115):0.436727987):0.265785358,c3601:1.456395754):0.219414447,((c1957:0.243474203,c6298:0.453974401):0.296882649,c1119:0.710173642):0.477415985):0.156940929,c761:1.655302736):0.150278512):0.105225842):0.037269761,(((c4965:1.111409576,((c2025:2.035230831,((c5259:0.616990289,(c2040:0.998955223,c3201:0.974662435):0.402029109):0.127091884,c6352:0.773896158):0.355478146):0.000000006,c1433:1.285742133):0.120459058):0.076539365,(((c330:0.384263946,c4495:0.717134322):0.405121889,((c1071:0.837716725,c3954:1.133149618):0.328366381,c2688:0.745782643):0.099876815):0.261162216,(c4978:0.865803071,((c3592:1.015846863,c5314:0.221856116):0.377265873,c4097:0.447737360):0.366433988):1.180052512):0.131534440):0.115509650,(((c124:0.674182265,(c4196:0.379623498,c6044:0.000000005):0.391667745):0.185801025,c3902:0.635861543):0.388826446,(c3064:0.906088324,(c2400:0.510195037,c6386:0.468168037):0.185278156):0.359000115):0.067796278):0.047915500):0.038474656):0.037491033,(((c290:0.476227553,(c4752:0.472244132,((c5829:0.853333209,c3185:0.336179729):0.582991018,c2330:0.856260825):0.242913975):0.130948061):0.211495432,((c3761:2.008558999,(c898:0.511196237,c5886:1.936006458):0.902737850):0.088328793,(((c339:0.235812657,c4758:0.510139437):0.065731553,c5210:0.882948634):0.145895678,((c3720:0.748873883,c2710:0.691536698):0.070032539,c1339:0.802758425):0.319433428):0.050860072):0.050942779):0.062210356,(c3339:0.698356539,(c6571:0.000000005,(c1081:0.000000005,c4424:0.000000005):1.144463671):0.221249385):0.286737459):0.049098483):0.030146955,(((((c3929:0.274626400,c2629:0.403357227):0.254041228,((c413:0.830318066,(c2631:0.097877846,c2941:0.187476978):0.440826027):0.163151943,c3763:0.616583443):0.098682960):0.134446968,((c4014:0.950086650,c4650:0.655845907):0.092668225,(c4442:0.565757888,c4403:0.562907025):0.501393938):0.380322520):0.068995843,((((c340:0.995571961,c4667:0.585930586):0.239116218,c2168:0.817459146):0.188155270,((c1597:1.404671922,c3901:1.437665165):0.466058272,(((c2664:0.709459422,c1455:1.073597979):0.148992687,(c1854:0.292725548,c1888:0.515891351):1.044270062):0.208140828,((c6272:0.043308366,c6073:1.705606794):0.740761616,c2985:0.789574847):0.365983378):0.161474464):0.165635217):0.175295592,c6361:1.409020169):0.080123610):0.064225350,(((((((c2048:0.687564565,c3228:0.522468805):0.258136870,(c6572:0.0,c6573:0.0):0.227877158):0.109498957,(((c5675:1.620841190,c4062:0.606417275):0.176162451,(c243:0.571517867,c4727:0.732390937):0.185690819):0.088801464,(c2397:0.535118142,c2164:1.454992647):0.282120348):0.079733358):0.018187573,(c2594:0.528832687,c4446:0.644153089):0.078480550):0.062882148,(((((c2636:1.931275804,(c831:1.410915306,c3422:1.342091283):0.308012822):0.614473093,((c3814:0.525744617,c2803:0.412699867):0.160617674,(c5526:0.295240986,(c6481:0.057233232,c6482:0.053366707):0.187218211):0.245771394):0.061900330):0.000000005,c3090:0.718511891):0.092705839,((c3883:0.650068558,(c2140:0.368718991,c6396:1.451735015):0.381260341):0.087513744,(c4901:1.165709807,c6537:0.674176684):0.290205033):0.159731736):0.017676857,(((c3908:0.609745275,c5925:0.476293683):0.070235550,(c5520:0.511727554,c6519:0.553110555):0.153077296):0.116895433,((c6332:0.527468577,c2460:1.371763749):0.163283833,(c2931:0.548868577,(c6357:0.679106840,(c6328:0.348886710,(c559:1.271280540,(c424:0.501762639,c2797:0.906432951):0.938224713):0.474834456):0.099125062):0.140496219):0.070930542):0.103941520):0.090121250):0.080625676):0.044943195,(((c6283:1.204161511,(c877:0.409901105,c1152:0.160491866):0.533253169):0.584843950,(c6329:0.919561577,c3214:0.291043246):0.079465978):0.083512282,c3213:0.524971877):0.153972734):0.035317351,((((c5698:0.644547732,c3636:0.403813453):0.238699403,c5568:0.670867154):0.186090787,c888:0.465829647):0.140775117,(c3991:0.012122459,c6605:0.060247059):0.476717391):0.122090707):0.038622518):0.037986127):0.001418176):0.012798781):0.014558735,((((((c2340:0.978536803,(((c353:0.447290749,(c1495:0.513473340,(c3623:0.000000005,c6379:0.000000005):0.281798536):0.168658259):0.051056915,c1539:0.275406583):0.124262403,(c3907:1.013830003,(c1034:1.355021872,(c4122:0.417898999,(c3130:0.211799269,c3609:0.146148758):0.310155763):0.521973693):0.386161887):0.153925750):0.105052935):0.096431949,(c2079:1.622449568,((c6576:0.477959715,c4218:0.975035800):0.122120193,(c3057:1.265306233,c4956:1.227733985):0.048055821):0.000000012):0.241437155):0.067247819,(((((((c5954:0.000000005,(c6342:1.598450745,c5539:0.150100617):0.611315543):0.514214900,(c4528:0.474140861,((c3180:0.192986139,c5732:0.159001129):0.390336238,(c2453:0.678322930,c3684:0.920050712):0.151342712):0.125977042):0.187779498):0.459892356,((c1735:1.023654062,(c4004:0.466467436,c5621:0.532188787):0.205634927):0.443843484,(c3667:0.918759518,(c2523:0.797317807,c6491:1.256158007):1.044125878):0.289032688):0.230997683):0.065424913,(c173:0.582171155,(c5494:0.783895904,c1221:0.821384495):0.188157138):0.158519715):0.066927923,(c2209:0.485334340,c5144:0.663648861):0.246272934):0.035713689,(((c2232:0.864439082,c3650:0.313422879):0.374807034,(c1129:0.721821789,c2203:1.096706214):0.027945863):0.147631377,(c4267:0.860608775,(c6581:1.114039581,c1413:1.285225970):0.195286868):0.071989402):0.105279157):0.021880548,(((c1255:1.005331418,(c5499:1.288148019,(c1089:0.143812116,c1360:0.222149930):0.133825105):0.546072044):0.068940753,c1585:1.589698475):0.393381811,(((c1436:0.863012831,c3653:2.857389223):2.175935173,(c657:2.305872182,((c4745:0.517481977,c5879:1.405042953):0.199121415,c6520:1.537983692):0.176195733):0.000000006):0.000000005,((c2569:0.000000006,c6606:0.136666721):0.561749150,c4834:0.858298622):0.164965542):0.060265050):0.058448021):0.040802714):0.001712819,(((c4632:0.287475605,c5246:0.467191736):0.106922860,c6262:1.325090423):0.223928795,(c1885:1.260166404,((c4369:1.304299314,(c2283:0.384167749,(c4007:1.136213757,c4223:0.322220454):0.513041583):0.843551325):0.839995620,(c6487:0.982789022,((c4059:0.769012389,c6334:0.534627938):0.572768371,c262:0.427644066):0.209973148):0.081655866):0.173326603):0.073429419):0.326882535):0.036759002,(c2793:0.519076062,c3847:0.753835401):1.276079707):0.007181803,(((c3119:0.989302834,(c3632:0.333943126,c6378:0.366021309):0.258098936):0.252861577,(((c157:0.0,c158:0.0):0.973631050,c1085:1.361255287):0.170397506,((c3033:0.567620835,(c5992:0.068319510,c6305:0.337427792):0.532692368):0.456706848,(c1054:1.290823827,c3647:0.577488133):0.162642742):0.077868373):0.073922469):0.054475522,(c4260:0.379230803,(c2611:0.566676461,c2503:0.806671208):0.078550149):0.298791308):0.080847051):0.017248276):0.008044681,((((c1200:0.866187188,c1911:0.000000012):0.852321925,((c3652:1.924437180,(c253:1.031847885,c5959:0.653013581):0.448152455):0.173327681,((c1016:1.008560794,c2113:0.404234122):0.334005170,c2642:0.966786849):0.169570547):0.017800230):0.100729037,(((c902:1.686521243,(((((c1346:0.813692493,c2461:0.156691601):0.195249204,((c4934:0.200931132,(c2988:0.313752527,c3525:0.033143448):1.691598313):0.716493698,(c6306:0.897758162,c3655:0.715932310):0.186503678):0.167933577):0.150167598,((((c745:0.475066889,(c1961:0.299156557,c3891:0.248694226):0.555104522):0.391549020,c3423:0.772347801):0.225165519,(((c4019:0.358122022,c927:1.743512001):0.169243423,(c4287:0.722287729,c4527:1.159058373):0.519279587):0.115397505,(c1503:0.000000005,c1995:0.847790977):0.410770979):0.160791618):0.154824631,c4235:1.830029874):0.044562561):0.084314913,((c3207:0.449824281,c718:1.485443055):0.240910121,((c1796:0.563722171,c5935:0.695394936):0.162181263,c3053:0.423354463):0.180628958):0.118122239):0.101707905,(c5565:0.352188114,(c258:0.000000005,c5728:0.000000005):0.593239756):0.440514802):0.046014610):0.036167501,c994:1.390922660):0.087654453,((c2954:1.546764916,c313:0.682232209):0.000000005,((c1511:0.447796517,((c2038:0.603991529,c1222:0.908174834):0.148432510,c360:0.661956669):0.055771266):0.228290658,((c760:0.580566640,c3151:0.268713200):0.645307116,(c3855:0.427202042,c5212:0.875614750):0.090657347):0.247922234):0.273989697):0.022746513):0.043516692):0.060898322,(((((((c24:0.286376733,c1033:0.833062376):0.140147052,(c1971:0.405170656,(c1162:0.247557261,c3438:0.000000006):0.769048915):0.045599610):0.240015473,(((c1792:0.778159335,c239:0.064068172):0.112149572,(c4257:0.399807723,(c1962:0.400892724,c5178:0.486665837):0.476387465):0.329653909):0.194725639,c6071:0.810096962):0.017703718):0.175558771,((((c4217:0.384001242,(c584:0.313017501,c1144:0.303831304):0.138434016):0.189631789,(c4879:0.418576666,(c2787:0.367688285,c3157:0.523788966):0.317618898):0.057727372):0.147858817,(c4502:0.465806660,(c5310:0.143501787,c3335:1.233207678):0.121099398):0.150566884):0.050489730,(c1273:1.780670372,(c335:1.532214952,c4067:0.449842738):0.276383072):0.406877107):0.075021378):0.024386014,((c3575:0.955802924,(c768:0.605812414,(c906:0.458599479,c3408:0.943167537):0.207576095):0.231975631):0.085899070,c4204:0.431625757):0.112483876):0.053500964,((((c1980:0.405582517,(((c457:1.686061782,c2430:1.657749418):0.207567511,c476:0.522232137):0.238636530,(c1471:0.848084557,c5971:0.219467224):0.309715265):0.135445231):0.133166888,(c1469:0.556434276,(c169:0.533103232,c2895:0.960095242):0.230889396):0.105687439):0.036156333,((c5020:0.000000009,c564:1.030178833):0.268083998,(c799:1.356650173,((c6526:0.532151684,c3488:1.375711787):0.092986027,c3393:0.856615659):0.160724258):0.159388345):0.197685956):0.028465028,((((c5201:0.000000006,c705:0.480016951):0.250897820,c3771:0.350774309):0.262444401,c53:0.992876596):0.179330475,(c5692:0.840051584,(c676:0.568480582,c6525:0.431781299):0.196811717):0.059025667):0.182692612):0.043990763):0.047680317,((((c5785:1.125430765,c4273:0.966213920):0.970183925,(((c2850:0.248743276,c6445:0.881075868):0.332465014,((c4073:0.496283171,(c4364:1.480523307,(c6533:0.476691173,c4486:1.265905982):0.105607693):0.075295407):0.115648161,c5273:0.649118563):0.128751013):0.134474864,(((c3154:2.323544958,(c1151:0.501450366,(c2363:0.000000005,c608:0.000000005):0.566144325):0.669776241):0.246029974,(c4139:0.545253026,c4325:0.983345133):0.284038858):0.215028408,c5944:2.036342141):0.072806973):0.041829204):0.000000005,((c6417:1.229222339,c6451:0.000000006):0.700922199,c2223:0.413866973):0.148185084):0.055305673,(((((c5955:1.111254535,c3419:0.715954862):0.123525737,(c5723:1.674530641,c619:1.108599213):0.284435749):0.109338521,(c6408:0.555812102,(c6317:0.602193261,c2871:1.285252417):0.079056296):0.397238874):0.136971148,(c5973:1.059028161,c6349:0.534247411):0.103698644):0.099232421,(((c1472:0.126139751,c2215:0.027184312):0.401786737,(c574:0.442995185,c3566:0.394273738):0.178225740):0.226704141,((c4203:1.130272409,(c6557:0.279593768,(c3420:0.180599903,(c17:0.238344502,c1456:0.278456228):0.000000005):0.183170404):0.369871412):0.867495928,(c2820:1.810274861,((c2077:1.326604473,(c4946:0.241798916,c5250:0.233153765):0.631241354):0.996425494,(c3036:1.732906896,(c2274:0.506161302,c2732:0.555295087):0.820675903):0.764478334):0.236035845):0.109886921):0.160678891):0.035571307):0.025403652):0.030649023):0.022533035):0.014468185):0.004185403):0.044620214):0.043375018,(((((c1185:0.378272432,c2906:0.431065234):0.173241514,((((c5294:0.484919449,(c2615:0.525723259,c5537:0.501887168):0.109753062):0.105000085,(c1145:0.495431803,(c806:0.475819049,(c6123:0.238919685,(c3649:0.238788367,c4386:1.449055169):0.237036091):0.164452534):0.107077207):0.085663171):0.053711027,(((c3089:0.692739885,c826:0.581547778):0.050902260,(c4928:0.837766582,c3396:0.680082276):0.267629965):0.117912317,((((((c1377:0.513017578,c4888:0.408476202):0.128088410,(c3564:0.598141530,c3881:0.509382491):0.112364812):0.137987388,(c3850:0.470651842,c4378:0.509835478):0.668636477):0.195645847,(c4283:0.826999318,(c3693:0.466145058,c4750:1.097011794):0.220227120):0.202941668):0.104361710,((c3754:0.562164026,c6048:0.627479710):0.245366034,(c3256:0.613492706,c3612:0.489600044):0.116946491):0.103379377):0.112583018,((c5013:0.453166618,c5415:0.587586555):0.219931449,c416:0.384258730):0.015665090):0.059390583):0.045475226):0.022487430,((c5618:0.515224713,(c4753:0.868178401,c5763:0.390774204):0.073279791):0.093387309,(((c1258:0.520669436,(c1118:0.406698974,c2868:0.438011936):0.241686055):0.162021236,((c1210:0.408327198,(c4476:0.367291425,(c5724:0.436631436,(c455:0.384239406,c5595:0.340409379):0.289271600):0.077237854):0.082388793):0.231200271,((c4783:0.293087043,(c230:0.119878665,c4996:0.164169681):0.273055100):0.196850742,(c4709:0.452016893,((((c3572:0.286997484,c4973:0.154681522):0.069340378,(c4769:0.229426410,c5821:0.424597063):0.161753514):0.056771829,c2057:0.390970753):0.082058019,(c484:0.450875804,c5156:0.276644683):0.097770514):0.030863532):0.092304484):0.049475941):0.037727395):0.038551999,(c1205:0.507085708,c3950:0.522563226):0.165675299):0.027932157):0.038445285):0.012748200):0.024619181,(((((((((c1107:2.204549881,(c4405:1.906076222,c2707:4.375417237):0.245202634):0.073623091,(c3195:1.626991323,c3199:1.950669220):0.775588713):0.101368936,(c5708:0.306769154,((c2204:1.353419577,c4732:0.621025555):0.776752773,(c2924:1.314425836,(c1540:2.662738776,c4962:0.000000005):1.727415951):0.385020309):0.514845464):0.682334650):0.013118576,(((c4710:0.375970114,c4763:0.255780962):0.733596145,((c2724:1.342006777,c5926:0.359995642):0.373787938,c3971:2.028218860):0.356595832):0.073504875,(((c4096:0.700882246,(c483:1.663216260,c6489:1.264491104):0.115214383):0.049777247,(c1615:0.672018915,c987:0.761709929):0.912016190):0.209734051,c5393:1.465428039):0.184749220):0.041982782):0.036418638,((((c583:0.996836148,(c2401:0.413766866,c2213:0.529355822):0.505365521):0.442708699,(c4081:1.508020932,(c4762:1.476332744,(c1900:0.401389129,c4987:0.896999563):0.533248614):0.242300133):0.250968470):0.131858970,(((((c383:1.332680765,(c6344:0.000000016,c985:2.113809054):0.780889196):0.099540790,c4922:0.726471096):0.066857196,(c69:0.453365675,c976:0.526200381):1.864113508):0.492781267,c3712:1.672405269):0.205954740,(c2151:1.629281867,c4013:0.943233401):0.465458214):0.046432051):0.047398510,((c585:1.110087549,(c3987:0.506196773,(c570:0.741631352,c2241:0.448276668):0.693313452):0.693049706):0.202472482,(((c1298:0.062320372,c3981:1.460392564):0.671730079,(c587:0.713126030,(c4730:1.661539077,(c1156:1.033977520,(c3330:0.000000005,c5905:0.000000005):0.966569206):0.257769902):0.966536322):0.116315143):0.101664328,(c30:0.512728072,((c5982:0.980731065,c6286:0.181061081):0.382115507,(c3578:0.644428114,c5674:1.255914397):0.011758046):0.162016661):0.083901035):0.165415695):0.154377664):0.151131774):0.042453758,((c4377:1.370997851,(c567:1.384873765,((c4145:0.715362295,c3387:0.782483382):0.465673431,(c4058:1.866483162,c4448:2.371805258):0.539699217):0.217288280):0.092209250):0.267441043,((((c255:1.721625970,c5317:0.559427439):0.193100662,c4955:0.823806448):0.387918610,c601:0.057455256):1.075913578,(((c719:0.941870897,c6318:1.056545704):0.243182046,c2765:1.153061124):0.715248842,((((c2119:1.388258109,c370:1.026940469):0.409612556,c2028:0.974198290):0.402698652,c1042:0.350526968):0.166112297,c1718:1.110863050):0.927975246):0.071231347):0.022791944):0.104716567):0.037451022,(((c3071:0.558052677,(((c4624:0.371144021,(c707:0.123419044,c2768:0.300303509):0.210480793):0.059586530,c749:0.582111342):0.070520245,c333:0.519474177):0.160752491):0.019825670,c1849:1.042734986):0.009406323,c1890:0.753459182):0.000000006):0.037877563,(c4980:0.419746824,(c3692:0.369168897,c5678:0.423992835):0.214145323):0.164195664):0.026191654,c1269:0.540305085):0.021369343):0.028354410,((c250:0.399213545,c341:0.473987063):0.387599455,(c4415:0.499850401,(c1040:0.441298413,c2588:1.022731372):0.082036677):0.172358784):0.069479360):0.016192847,((((c4474:0.486854255,(c4475:0.377514114,c5998:0.344753020):0.074731207):0.069705114,(((c1400:0.427921751,(c2074:0.381567207,c5495:0.514433830):0.156198766):0.084974607,c5748:0.447329068):0.048286225,(c4566:0.418909828,(c2396:0.510358695,c2825:0.370121289):0.227793831):0.084440080):0.071218413):0.057867981,c3871:0.497686588):0.010183517,((((((((c5263:0.219051301,c6658:0.238553176):0.181734049,c4057:0.474095952):0.069354350,((c284:0.013094041,c6495:0.005175515):0.398014816,c4808:0.426174523):0.085967219):0.032895382,(c2104:0.552813343,((c4398:0.627384707,c2887:0.373506317):0.052226726,(c2911:0.000000005,c6446:0.032957596):0.433996190):0.129124018):0.088095437):0.025704745,c4612:0.508994316):0.032740148,(c3231:0.374094276,(c6655:0.041294901,c6656:0.037116180):0.336261218):0.118356572):0.064848840,(c2227:0.542956945,(c4942:0.574326066,c5497:0.790989707):0.140704358):0.114118965):0.059337049,((((((c614:0.123068707,c2828:0.272488246):0.257638741,(c781:0.486708776,c3755:0.500738419):0.075308323):0.172241866,((c4707:0.527108823,c5521:0.411224866):0.125516480,(c3701:0.410267177,c3280:0.408766167):0.113047302):0.057042878):0.130281623,(((c1530:0.962816422,c5841:0.434710197):0.128237483,(c5113:0.621822797,c1534:0.426144140):0.086830450):0.067011717,((c1043:0.498924604,(c5285:0.320848602,c5615:0.339963557):0.163424401):0.148380165,((c1290:0.442848024,c3401:0.273001285):0.100558408,((c1104:0.498805844,(c5571:0.317059797,c1133:0.411191530):0.111699152):0.057430889,(c3648:0.369244356,c6521:0.437586150):0.092777692):0.044983960):0.027754591):0.027036242):0.034763783):0.042325976,(((c4694:0.370152384,c4801:0.375473002):0.072593402,(c6009:0.424602099,((c5428:0.296339170,c5700:0.293783081):0.100695449,(c2438:0.554069573,c2804:0.457348354):0.031727715):0.058898666):0.085853230):0.085154313,((c3630:0.295953032,c5126:0.350674951):0.141216521,(c3952:0.389467771,c4428:0.417386775):0.073624501):0.094560923):0.079181906):0.034424191,((c4420:0.420553661,(c4388:0.371203209,c1860:0.410297296):0.067094352):0.058748583,(c2261:0.313921744,(c848:0.378656607,c1274:0.508543445):0.042533310):0.049128750):0.059327215):0.054633731):0.029112701):0.019255501):0.028209899):0.041092642,((((((c1272:0.297375295,((c78:0.005401980,c5322:0.000000005):0.222408380,(c1690:0.181636789,c6216:0.217760092):0.043986427):0.039876536):0.051652563,((c5532:0.318760292,c6355:0.296397697):0.153686130,(((c863:0.311327578,c4198:0.185668032):0.075832056,(c3888:0.327421437,c5587:0.361318685):0.095520293):0.067493678,(c4025:0.319071272,c6255:0.236580630):0.066125467):0.062024279):0.016642421):0.020244155,c622:0.886348174):0.019145838,((((c1538:0.000000005,c2156:0.000000005):0.292782539,(c2481:0.118701828,c5559:0.096683878):0.273026038):0.047393356,(c1603:0.376686378,(c75:0.315900339,(c5922:0.105750265,(c1300:0.034759450,c1299:0.206710116):0.032602799):0.270587410):0.109584269):0.125191766):0.024967774,(c2155:0.283491934,(c4778:0.388856155,c4780:0.281129568):0.054709658):0.058581304):0.023322981):0.027770437,(((c6096:0.443707986,(c2802:0.392194791,(c5329:0.389182745,(c5582:0.394603494,(c490:0.321875629,c1582:0.439780958):0.115066421):0.086415272):0.057421734):0.037498329):0.059335392,c4782:0.300420233):0.041443171,((c1702:0.324085202,c2206:0.413100611):0.093236981,(c2694:0.388809052,c5809:0.418725773):0.046012465):0.161396270):0.057740959):0.042868488,((((((((c3868:0.162348677,(c5679:0.323123837,((c3959:0.0,c3960:0.0):0.020852554,(c3961:0.002660404,c3962:0.002659004):0.020558772):0.243659680):0.029797185):0.045480989,(c4558:0.176337194,((c755:0.049843411,c756:0.036251295):0.044700753,(c754:0.109595175,c3869:0.077134616):0.037605520):0.024639189):0.068843267):0.046461930,(((c2120:0.021546152,(c5846:0.027783262,c2121:0.037617758):0.010156654):0.174039727,(c2114:0.133370601,c5784:0.100311691):0.029103332):0.023895850,((c965:0.093980397,(c966:0.015776703,c967:0.003248580):0.137241162):0.060682005,((c2282:0.061201781,(c5299:0.045662541,((((c5300:0.002662195,(c5283:0.005328707,c5302:0.000000005):0.002661631):0.000000005,(c5301:0.0,c5303:0.0):0.000000005):0.000000006,(c5304:0.000000005,(c5306:0.002667727,((c5308:0.000000005,c5309:0.002666226):0.005354226,c5305:0.000000005):0.000000005):0.002671038):0.002667568):0.002669038,c5307:0.000000005):0.051291077):0.026883857):0.017818179,(((c5354:0.029386361,(c2300:0.027945473,c5404:0.045897028):0.013315563):0.098960528,(((c5633:0.000000006,((c5628:0.000000005,c5847:0.002688453):0.010727091,(((c5630:0.000000005,c5629:0.002674150):0.000000005,((c5848:0.000000005,c5849:0.002692333):0.002694641,c5426:0.002673490):0.000000006):0.000000005,(c5632:0.000000005,c5631:0.002676296):0.002674651):0.000000005):0.010747434):0.000000005,c5850:0.002693708):0.023470624,(c5672:0.010929825,c5649:0.029421510):0.008521316):0.003519727):0.029977644,c881:0.027074387):0.038517314):0.124946282):0.023636706):0.032689917):0.025948907,((c3770:0.051260608,c3811:0.094731331):0.063222466,(c869:0.140943227,c5346:0.103918080):0.037841783):0.124813932):0.033426408,(c5805:0.223205988,(((c4926:0.057693111,c482:0.093645723):0.016836299,((c3936:0.027494945,c5114:0.047918965):0.046024857,c4929:0.056803423):0.017726646):0.054931166,(c3890:0.088284548,((c4759:0.068130350,(c5407:0.015275147,(c5406:0.027570810,(c5396:0.008226112,c5405:0.000000005):0.005843392):0.010507225):0.043179168):0.023733735,((c5332:0.065716465,(c4666:0.055226439,c5610:0.032713847):0.054321823):0.007391561,c5185:0.096131749):0.014392627):0.021085105):0.021313785):0.077470663):0.055529720):0.129558282,(((((c6210:0.218471612,((c4570:0.028371078,(c3314:0.005480297,c3315:0.002754635):0.000000005):0.118625196,(c2855:0.051680027,(c2831:0.000000005,c2832:0.000000005):0.032544348):0.132362862):0.045397619):0.016743839,c5453:0.327954231):0.038047840,(((((c6242:0.137324495,((c6233:0.023099131,c6234:0.026762999):0.034194340,((((c6241:0.041101760,(c6236:0.000000005,c6237:0.005363182):0.033858626):0.007556576,(c6240:0.005441458,(c6238:0.000000005,c6239:0.000000005):0.002621358):0.034359542):0.003777147,c6235:0.032688794):0.062298014,(c6243:0.039250797,(c6226:0.016591131,(((c6227:0.0,c6229:0.0):0.005420379,c6228:0.002689155):0.004576878,((c6230:0.002680644,c6244:0.011048829):0.000000023,(c6231:0.0,c6232:0.0):0.000000005):0.008971860):0.007923742):0.021939475):0.008229052):0.066542402):0.039302125):0.035305257,c6130:0.152101453):0.018027678,((c2070:0.0,c6253:0.0):0.128400112,c6254:0.116879473):0.120948474):0.036504614,c6252:0.132021173):0.031736946,c6157:0.343560346):0.058536440):0.045388794,(((c6224:0.247715879,c6201:0.297651017):0.040848969,c6247:0.225104999):0.024789528,((c1705:0.0,c1707:0.0):0.000000005,c1706:0.000000005):0.212384562):0.006580201):0.045741148,c6219:0.329046639):0.052219057):0.036940941,c1587:0.320003493):0.035597927,((c5563:0.353574289,c6097:0.356308507):0.044466535,c556:0.500614841):0.046978238):0.044580288):0.040013202):0.039400587):0.014318790):0.032585514,(((((((c1392:0.148239627,c5390:0.152721297):0.142745339,(c1701:0.218526517,(c1692:0.099938580,(c1708:0.029209821,c1709:0.056461512):0.068767347):0.082631902):0.041244733):0.037056215,((c1991:0.085232531,c5818:0.074845437):0.158661916,(c3373:0.215714934,c3730:0.215498722):0.074498924):0.070461853):0.062789175,(c1689:0.105902299,c6188:0.158029120):0.230764174):0.052401020,((c1710:0.374016481,(c2084:0.456355990,c4997:0.367385136):0.138511948):0.056734057,(((c2838:0.573627957,((c4754:0.196339572,((c4440:0.076817471,c6213:0.104100082):0.141575756,(c6119:0.115165982,(c1631:0.247192578,c6257:0.077776071):0.017589972):0.078003233):0.034793988):0.059113218,((c3722:0.074142977,c5507:0.099640507):0.143664806,(c6437:0.239112016,c1260:0.330280451):0.049482824):0.087654138):0.071513395):0.029661984,(((c1676:0.000000005,((((((c1669:0.0,c1670:0.0,c1682:0.0):0.000000005,c1688:0.002688259):0.000000005,(c1671:0.002689379,c1672:0.000000005):0.002688259):0.002687522,(c1677:0.002691568,((((c1680:0.002690891,(c1681:0.0,c1685:0.0,c1686:0.0):0.000000005):0.000000005,c1678:0.002687767):0.000000005,c1679:0.002686838):0.000000006,(c1649:0.002686610,c1687:0.002688368):0.000000005):0.000000005):0.000000006):0.000000005,c1675:0.002691960):0.002686956,(c1668:0.002694272,((c1683:0.0,c1684:0.0):0.000000005,(c1667:0.002693447,(c1673:0.005384295,c1674:0.000000005):0.000000005):0.002689166):0.000000005):0.000000005):0.005389199):0.163533861,((c1665:0.070476936,(c1663:0.039213598,c1664:0.051246309):0.069865347):0.093797062,((((c6114:0.009550446,c6115:0.004609998):0.077122687,(c6113:0.059565740,(c6108:0.012033859,c6109:0.023794506):0.036611906):0.021520969):0.049556309,(c6118:0.106748840,(c6101:0.023200886,(c6099:0.014308213,(c6098:0.008932278,c6100:0.015983515):0.012103774):0.008958535):0.134699069):0.025435120):0.049522197,(c6105:0.119999559,(c6102:0.165651920,(c6106:0.070775016,((c6111:0.000000005,c6112:0.005427966):0.056300387,(c6110:0.051167705,c6107:0.074761493):0.016425249):0.084032323):0.019363767):0.037351981):0.031707617):0.037962784):0.021347349):0.127919381,(((c4724:0.076090893,(c4722:0.014886264,c4723:0.010050122):0.062838909):0.141473487,(((((c4039:0.0,c4040:0.0):0.000000005,c4041:0.002751037):0.021710404,(c4037:0.012134036,(c4035:0.000000005,(c4038:0.016626726,c4036:0.002652514):0.008263324):0.012864802):0.026734420):0.017860067,((c4033:0.004702771,(c4032:0.000000005,c4034:0.000000005):0.009310043):0.020361258,((c1389:0.003403314,(c1391:0.023944421,(c1387:0.000000005,c1388:0.002766532):0.009927741):0.035354313):0.016150218,(c1386:0.019644743,c1390:0.013934403):0.009640372):0.051993584):0.014098764):0.050447376,(((c4178:0.008356427,(c4175:0.002778934,c4176:0.000000005):0.002783477):0.000000005,(c4179:0.002778550,(c4180:0.002771792,(c4181:0.000000005,c4177:0.016767966):0.000000005):0.000000005):0.002778161):0.078396015,(c4042:0.072601543,((((c4049:0.002813546,c4050:0.000000005):0.002790915,((c4043:0.000000012,c4046:0.000000005):0.019816521,(c4048:0.005672150,(c4047:0.0,c6479:0.0):0.000000005):0.000000005):0.000000005):0.005601800,c4044:0.002775278):0.002808782,c4045:0.000000005):0.061472737):0.029033862):0.054198658):0.068516440):0.162916647,((c6183:0.0,c6184:0.0):0.193310359,(c6124:0.174936775,((c6248:0.014797489,(c6175:0.042143581,(c6249:0.000000005,c6250:0.002734368):0.022697633):0.029353080):0.110528089,(c1002:0.128193161,c4088:0.147812050):0.034776645):0.079328576):0.038388486):0.040028494):0.032345783):0.020778506):0.040585530,((c3779:0.269376352,(((c5195:0.074758238,(c5197:0.009037033,(c5194:0.019933707,c5196:0.031268926):0.010191339):0.064391799):0.055547044,(((((c5060:0.008335482,c5057:0.030878398):0.013721936,c5061:0.000000005):0.014977521,c5058:0.009986559):0.012784329,(c5059:0.041261187,(c5062:0.016342641,c5063:0.002970018):0.048594140):0.016147254):0.035815959,(c834:0.067921868,(c6246:0.038936065,(c4580:0.020969831,c4581:0.033822467):0.021895849):0.019055369):0.045252070):0.044850723):0.173752543,(c5207:0.175212079,(c862:0.080708903,(c595:0.070380787,c599:0.065039182):0.041087686):0.108268485):0.073455890):0.112944645):0.075261363,((((c3737:0.096125664,c4706:0.126351695):0.100497726,((c682:0.078192380,c741:0.053957670):0.049162271,(c3815:0.161493655,(c3893:0.067342423,(c4323:0.101660348,(c3858:0.071742738,(c3817:0.023170477,(c3816:0.047907709,c3903:0.061688959):0.022164605):0.044143508):0.033048461):0.010515245):0.025746588):0.039121241):0.051696267):0.090868755,(((c5782:0.193162870,((((((c2909:0.042969732,c5206:0.078089208):0.143387643,(c4749:0.111561320,c5670:0.111896279):0.044583459):0.032602387,(c3307:0.103185632,c5773:0.233246482):0.069137675):0.026995434,(c661:0.109841177,(c3620:0.096332440,(c3645:0.127887654,((c3558:0.037183447,(((c3497:0.000000005,c4819:0.002738698):0.060944039,(c2771:0.065421763,c3496:0.024644427):0.016858855):0.009663933,((c4454:0.023699637,(c1172:0.000000006,c4455:0.002775620):0.048736730):0.030069567,((c1266:0.000000006,c1267:0.010971332):0.057662287,(c1250:0.004359965,(c3579:0.002347303,c3580:0.007179029):0.005579436):0.060961234):0.023883163):0.009762438):0.028191174):0.014561049,c4802:0.043978968):0.009244588):0.014523562):0.070156853):0.119397732):0.020622934,(c5774:0.094586970,c5781:0.104566343):0.105375407):0.044177982,(c5771:0.039519040,c5780:0.091579009):0.127615302):0.048458586):0.057205218,(c950:0.212542166,c6095:0.239681071):0.170037428):0.046985237,(((c6218:0.207958428,(c6185:0.016221797,c6186:0.020166057):0.137940399):0.052627574,(((c6181:0.121039637,c6200:0.098577703):0.066338326,(c6103:0.125742799,((((c6194:0.011345742,c6195:0.006547458):0.052694871,((c6190:0.050198320,c6191:0.097703555):0.018111199,(c6197:0.052552649,c6211:0.041764073):0.026319407):0.020352692):0.024038135,(c6192:0.060338524,(c6193:0.034249817,c6196:0.038513978):0.040808420):0.031521204):0.009086405,(c6198:0.104297828,c6209:0.083219813):0.028652812):0.069621556):0.014175211):0.038522670,(((c6177:0.013913407,c6178:0.003122882):0.024610860,(c6176:0.045274403,c6179:0.043930273):0.016296856):0.175245170,c4407:0.245429148):0.021910419):0.052978092):0.025208586,((((c6199:0.075282680,c6251:0.066095086):0.056324901,(c1703:0.056210245,c1704:0.108347204):0.047522856):0.081378296,(((((((c2878:0.126221206,c1653:0.124781897):0.029992135,((((((c3947:0.000000005,c3949:0.002758229):0.035717433,(c4550:0.005595388,(c4549:0.008267206,((c3948:0.0,c4551:0.0):0.002743243,c4548:0.002752459):0.002771812):0.005416350):0.010100709):0.083636327,(c4977:0.030489747,(c3946:0.087774295,((c3876:0.000000005,(c3874:0.002691733,c3875:0.000000005):0.013551168):0.059674548,(c3943:0.000000005,(c3942:0.008196065,(c3944:0.0,c3945:0.0):0.000000005):0.002722002):0.052097066):0.009058565):0.024202379):0.025448048):0.048040657,((c1648:0.053321241,(c1646:0.046454843,(c1647:0.042889649,c1693:0.057724910):0.038555284):0.010567934):0.028888168,(c6142:0.094670883,(c6149:0.042343475,((c6150:0.002753697,c6151:0.000000005):0.006460511,(c6145:0.041553230,(c6146:0.006988678,(c6147:0.000000005,c6148:0.002738446):0.006763018):0.006594738):0.017108978):0.037131930):0.033158540):0.027570887):0.014180733):0.023844952,(c6158:0.091670765,(c6152:0.000000005,c6153:0.002742092):0.110586781):0.052757630):0.022739825,c6144:0.110277733):0.018070421):0.018277559,c6141:0.072755381):0.042608161,(((c6138:0.121146286,(c2150:0.080967135,c3161:0.058585442):0.112739467):0.057015328,c1650:0.126596189):0.008605896,(c1651:0.097632557,(c1652:0.110114051,(c1645:0.082940934,c6133:0.120116869):0.026210364):0.029434510):0.037049124):0.041045137):0.009173878,((((c1032:0.095622799,(c3896:0.000000005,c3897:0.005489594):0.111998272):0.022734600,(c3716:0.095298449,c3983:0.061417550):0.051016460):0.032971443,(c1666:0.104623214,(c1637:0.105690609,c5783:0.154528911):0.054274081):0.018661114):0.006473367,(c6159:0.146197344,c6143:0.069385640):0.038097407):0.028667126):0.039854146,((c6160:0.118995356,(c6094:0.171846456,((((c6120:0.077755920,c6134:0.132233330):0.014445500,((((c6173:0.020523033,c6165:0.033148449):0.011145535,c6166:0.023709684):0.015234176,(c6167:0.000000005,c6168:0.008280284):0.021523268):0.023495405,(c6170:0.045507047,((c6171:0.000000005,c6172:0.002761167):0.026486023,(c6164:0.022868870,c6169:0.033664855):0.010884014):0.013854386):0.026861387):0.083682135):0.014298178,c1628:0.195654341):0.018206319,((c6136:0.015269543,c6155:0.047036094):0.075465196,((c6135:0.042003883,c6137:0.033028046):0.026814987,((c6139:0.006773640,c6140:0.015526800):0.024624178,c6156:0.083134700):0.015162527):0.012391161):0.045288785):0.019831666):0.023654970):0.025926407,(c3710:0.092688096,(c3709:0.002721348,c6154:0.000000005):0.086946751):0.032016227):0.044582116):0.024262308,(c6189:0.200275817,(c6132:0.097332221,c6217:0.177706339):0.045772576):0.026420492):0.033266688):0.047153532,c1699:0.306634727):0.030473969):0.041767943):0.057219168):0.052519794,(c6104:0.290775472,(c6309:0.241598304,((c2881:0.000000005,c2882:0.002769716):0.168596837,(c1599:0.127773793,c1600:0.140814696):0.042940193):0.109016746):0.053136885):0.026867362):0.044799112):0.048462157):0.018393969):0.000000005):0.025661206,((c3456:0.201331606,(c166:0.393374631,c6477:0.362017047):0.051191686):0.065583645,(c257:0.367815119,((c1691:0.118085841,((c1656:0.009803509,c1657:0.012795740):0.052809738,(c6245:0.038488099,(c1658:0.010600123,((c1659:0.0,c1660:0.0):0.000000005,c1661:0.002706466):0.011345527):0.020180708):0.029030857):0.059595099):0.098072968,(c6182:0.207006684,((c6187:0.071837831,((c6207:0.000000005,(c6206:0.000000005,c6654:0.000000005):0.002786759):0.020396706,((c6204:0.0,c6205:0.0):0.000000005,(c6202:0.000000005,c6203:0.002744156):0.002742605):0.004867268):0.010595302):0.143720079,((c1523:0.0,c1524:0.0):0.084053448,c6174:0.057034430):0.051894078):0.054958015):0.085583082):0.058670545):0.114071682):0.061810403):0.008415999,((c5138:0.407637391,(c2624:0.268889547,c5429:0.343328114):0.037079182):0.069231229,((c897:0.421287938,(c4106:0.435123056,(c6399:0.172729354,(c322:0.093384314,c3459:0.101396275):0.141229585):0.134170186):0.102979820):0.024050976,c6214:0.406513414):0.041309352):0.086508782):0.058807892):0.031634113,((((((c337:0.549567301,c1655:0.432003457):0.177043105,(c1654:0.108612876,((((c6221:0.024215000,(c6222:0.000000006,c6223:0.000000005):0.021448487):0.035591374,c6212:0.126927565):0.018953375,(c1694:0.013366268,(c1695:0.006835076,(c1696:0.002533239,(c1697:0.000000005,c1698:0.002785273):0.008657218):0.002786808):0.009252601):0.038572540):0.017668291,c1630:0.051605969):0.127088892):0.061568220):0.053319624,((c4800:0.314036580,c6568:0.424176456):0.059731961,(((c1512:0.125515691,c6475:0.222096571):0.228802333,c1302:0.435566288):0.040079805,(c974:0.204995490,c1602:0.296056031):0.056769545):0.101313349):0.042357788):0.063765585,((c5691:0.356652027,c1117:0.345070256):0.071944463,c6368:0.340343201):0.094149136):0.031929450,((((c1332:0.134219096,c3258:0.132268424):0.215921624,(c6384:0.002893710,c212:0.810745959):0.314603350):0.064250097,(c2186:0.0,c2187:0.0):0.343551625):0.066059598,((c164:0.219780996,c493:0.254146063):0.254943913,(c2835:0.382728526,(c1046:0.292833046,c6679:0.245437750):0.057601142):0.050990595):0.058221430):0.046409058):0.051650001,((c2584:0.571569237,(((c3471:0.523778312,((c1132:0.421964120,(((c1485:0.433587056,c5706:0.360812798):0.083931153,c2189:0.454409344):0.074470961,(c172:0.317788341,(c3605:1.731704301,c2447:0.000000009):0.167321912):0.402939872):0.021257024):0.097680190,c1343:0.513940745):0.072103661):0.020459282,((c1291:0.429046995,c6001:0.403686028):0.151095959,c6674:0.422818050):0.234218273):0.050864307,((c1905:0.995621382,c5758:0.288911192):0.317442124,(c338:0.000000012,c808:1.644795119):0.449954635):0.139886083):0.077666164):0.051517430,(c6280:0.491587501,((c1425:0.044293219,c6360:0.000000005):0.467194460,(c4585:0.627968407,c5279:0.557266630):0.313315590):0.231712291):0.141335501):0.033033995):0.011400664):0.034808701,((((c4862:0.691853432,c2790:0.338578781):0.070393187,c5465:0.337288590):0.037827872,(c2861:0.468449285,c3522:0.368866831):0.119671424):0.095686700,(((c5292:0.515367295,(c6019:0.794592161,(c2654:0.362441668,c3593:0.352501372):0.072345423):0.122242827):0.040149523,(c811:0.477957669,c1662:0.413088332):0.084791669):0.048359474,c611:0.459201711):0.071388355):0.060590022):0.033082704);
