# Supplementary material
Source: MDPI journal article supplement (https://www.mdpi.com/2073-4344/10/9/1072)
Supplement: s1 [file s1 › catalysts-923799-sm-r1/Supplementary Dataset 5.xlsx]

## Sheet: Sheet1
Short name	Organism	Full name	Genbank/Uniprot ID
Abi-PDH	Agaricus bisporus	Pyranose dehydrogenase	Q3L1D1
Agl-COx	Arthrobacter globiformis	Choline oxidase	Q7X2H8
Ani-GOx	Aspergillus niger	Glucose oxidase	P13006
Aor-Fox	Aspergillus oryzae	Formate oxidase	Q2UD26
Ath-HAOx	Arabidopsis thaliana	Hydroxy fatty acid oxidase	NP_565050
Bst-ChOx	Brevibacterium sterolicum	Cholesterol oxidase	P22637
Cbo-AOx	Candida boinidii	Alcohol oxidase	Q00922
Cgl-GDH	Colletotrichum gloeosporioides	Glucose dehydrogenase	G8E4B5
Cva-FAP	Chlorella variabilis	Fatty acid photodecarboxylase	A0A248QE08
Eco-CHDH	Escherichia coli	Choline dehydrogenase	NP414845
Gja-FDH	Gluconobacter japonicus	Fructose dehydrogenase	M1VMF7
Hel-CHDH	Halomonas elongata	Choline dehydrogenase	Q9L4K0
Mimivirus R135	Acanthamoeba polyphaga mimivirus	Putative GMC-type oxidoreductase R135	Q5UPL2
Mlo-PNOx	Mesorhizobium loti	Pyridoxine 4-oxidase	Q5NT46
Msp-HMFO	Methylovorus sp. (strain MP688)	5-(hydroxymethyl)furfural oxidase	E4QP00
Mth-CDH	Myriococcum thermophilum	Cellobiose dehydrogenase	A9XK88
Ncr-CDH	Neurospora crassa	Cellobiose dehydrogenase	CAD21388
Pam-GOx	Penicillium amagasakiense	Glucose oxidase	P81156
Pan-AOx	Pichia angusta	Alcohol oxidase	P04841
Pch-AOx	Pichia pastoris	Alcohol oxidase	F2QY27
Pch-CDH	Phanerochaete chrysosporium	Cellobiose dehydrogenase	Q01738
Pch-POx	Phanerochaete chrysosporium	Pyranose oxidase	Q6QWR1
Pdu-HNL	Prunus dulcis	Hydroxynitrile lyase	Q945K2
Pmu-HNL	Prunus mume	Hydroxynitrile lyase	B9X0I1
Ppu-AAOx	Pleurotus pulmonarius	Aryl-alcohol oxidase	AAF31169
Psp-POx	Peniophora sp. (strain SG)	Pyranose 2-oxidase	Q8J136
Rsp-CKOx	Rhizobium sp. GIN611	Compound K oxidase	G9ILI7
Ssp-ChOx	Streptomyces sp. SA-COO	Cholesterol oxidase	P12676
