# Supplementary material
Source: MDPI journal article supplement (https://www.mdpi.com/2073-4344/10/9/1072)
Supplement: s1 [file s1 › catalysts-923799-sm-r1/Supplementary Dataset 6.tre]

(((((Grc-GMC:0.14890575442524847660,Ccr:0.19375235454181688466)99:0.10322052656873903498,(OSX75970.1:0.05681196404038358488,(QDM14404.1:0.00168330106626293535,Pye-GMC:0.00000100000050002909)100:0.05604578369792727333)100:0.27141212310025131238)81:0.07690622569137338382,(KAA8494096.1:0.31428863697290876367,((XP_005706847.1:0.05416851398557347846,Gsu-GMC:0.02865190748505782453)100:0.41070234276533268414,(HHG08842.1:0.00000100000050002909,Cme:0.00172742835083316182)100:0.44690657747919854126)90:0.11625417696665385492)69:0.06285164648686536459)100:0.24193255627766255267,((MMseqs2-6:0.07131957512815285949,(Aa-GMC:0.00552891896941740558,(MMseqs2-50:0.00000100000050002909,((MMseqs2-16:0.00158152969118524394,(95083276:0.00000100000050002909,MMseqs2-10:0.00000100000050002909)76:0.00000100000050002909)59:0.00000100000050002909,99174184:0.00000100000050002909)53:0.00158011705071260449)100:0.00889774374513642961)94:0.03877972606399175681)100:0.60216351395758282994,(((((24741924:0.01279089752516070731,4123401:0.01296556631203364847)100:0.30256049734268930518,(25954189:0.06231516084338893646,((79747864:0.00000100000050002909,((86572939:0.02408545041998208167,88108869:0.00000100000050002909)100:0.00000100000050002909,82879934:0.00000100000050002909)97:0.00000100000050002909)100:0.01708833853561952595,50856796:0.01959786182639193519)97:0.07822518729465173515)100:0.22245077993006978634)99:0.19093473299329927206,((MMseqs2-57:0.00473389898312771926,55798257:0.00239221468624245710)100:0.21501812080422583184,((MMseqs2-4:0.00599304802842237638,(MMseqs2-5:0.00000100000050002909,84957631:0.00165950753431624702)80:0.00554298839372148380)100:0.09027433305808701958,((80074550:0.09980868915432630772,(MMseqs2-102:0.00209644373831609741,(18715199:0.00157598541208268592,80060596:0.00154928318309091790)65:0.00288629573819211950)100:0.09044855870870664727)96:0.04340131403702496282,((((MMseqs2-54:0.00000100000050002909,(50882223:0.00000100000050002909,(10548836:0.00000100000050002909,(MMseqs2-37:0.00159739994628868413,MMseqs2-25:0.00159691767264253043)44:0.00000100000050002909)53:0.00000100000050002909)100:0.00000100000050002909)91:0.00000100000050002909,76460653:0.00000100000050002909)100:0.09928924828296353811,QDZ18370.1:0.08844739484204945656)63:0.02843882221983224171,(((MMseqs2-11:0.00000100000050002909,(51495918:0.00000100000050002909,51851363:0.00000100000050002909)56:0.00000100000050002909)72:0.00161567930272411365,MMseqs2-17:0.00000100000050002909)100:0.01986756441571682977,75819940:0.01711440642532477407)100:0.15336778382337676319)66:0.05252706696053983937)54:0.04450790616825449353)98:0.18297499118601243118)100:0.32189618528274188680)87:0.09393452572316919602,(((((((Picsa-GMC:0.43385061012368719702,Ulmu1-GMC:0.39797985244791855841)25:0.03290344595340799483,(((((A0A248QE08:0.00000100000050002909,5NCC_A:0.00000100000050002909)100:0.00000100000050002909,XP_005842992.1:0.04074144223916154051)100:0.08883711297873073121,(Mic-GMC:0.08140159045295254636,Cso-GMC:0.11425133867234714413)87:0.04708099318560778762)100:0.11621699793186721084,(Picoc-GMC:0.17266318354392382051,((Picse1-GMC:0.00065393420310941254,Picok-GMC:0.00671925499291779055)100:0.11713195591115432848,((Pic2-GMC:0.00554605136857664813,Pic1-GMC:0.01483383469301712866)100:0.12049082921330725449,(45081375:0.09242722607744341401,((45105939:0.00000100000050002909,MMseqs2-0:0.00000100000050002909)100:0.02818885727195275318,(44191816:0.00000100000050002909,45065182:0.00000100000050002909)100:0.02755582887020347621)100:0.07323506249406344648)100:0.10540241835971760065)94:0.07321072297445010979)88:0.06114711645129845136)100:0.21329287203668148565)99:0.11498251539563779378,((Lobi-GMC:0.22201004987543232483,(Cs-GMC:0.23520840526307715268,Bbr-GMC:0.26233881634634892421)89:0.07145219611421474437)99:0.10360897609852826040,((((PNH05783.1:0.14584029538190815267,((AXL65962.1:0.00000100000050002909,Cr-FAP:0.00000100000050002909)100:0.06659514058328452890,(Vc-GMC:0.08037222419561522446,Gpe:0.04164775808982398853)46:0.02028916516895067079)70:0.04196243379342944751)100:0.10375070635633598659,(Chlch-GMC:0.12101180703363205449,Chles-GMC:0.16551770674282853535)100:0.09459714229092376636)76:0.05229363922530252951,((KAF5834678.1:0.00000100000050002909,Dus-GMC:0.00000100000050002909)100:0.24887494322053074769,(Chl68-GMC:0.14692002052442143523,(Chlle-GMC:0.14687794036742748971,GFH06812.1:0.20386214548578673877)80:0.03698107077014294725)52:0.03488157562826076086)84:0.05218345041537226364)71:0.07352825246568388262,(GBF88787.1:0.14905595534738486085,Chrzo-GMC:0.20346440056269887720)100:0.16743701816887107681)100:0.13933094039135793252)61:0.05989733414865720806)60:0.06908657354502366343)63:0.06389409665667250549,((7514247:0.03279674296501810388,14447664:0.00000100000050002909)98:0.00457348352931875000,MMseqs2-1:0.04183298913617351789)100:0.36662625267797366302)72:0.10625886018682585699,MMseqs2-3:0.63477027271699659750)95:0.12780160034210605313,((Ehu2:0.18627361508026685222,MMseqs2-7:0.29388475445020684207)99:0.13924598705133559018,((116725553:0.00000100000050002909,115633043:0.00000100000050002909)100:0.06498983994364354588,5461703:0.06763816994667888605)100:0.25632179436255392302)100:0.28972819776150743332)31:0.05566387829907969848,(CBJ25560.1:0.45542146846867698207,(Chve-GMC:0.67265753279988615976,((((32145454:0.00152176592777254153,32145453:0.00000100000050002909)94:0.00000100000050002909,1284070:0.00000100000050002909)100:0.13423939427531775270,(56991765:0.04193306913841276379,(61040891:0.07667148403055355776,32333240:0.11894653653154411976)71:0.04632227215234901996)81:0.05475040817314557468)100:0.47946896429118596172,((EWM27492.1:0.00000100000050002909,Nga-GMC:0.00000100000050002909)98:0.00829470739473586391,Nsa-GMC:0.00000100000050002909)100:0.44101763901004303881)59:0.09957023040159496130)81:0.08891525070351011251)88:0.08933947633904480712)31:0.06059908197092376408,(((116464801:0.00779146885932668985,(((((MMseqs2-49:0.00820737092407582136,(((63121799:0.00671642273254384296,(MMseqs2-101:0.00000100000050002909,18361266:0.00000100000050002909)49:0.00000100000050002909)100:0.03691645405295749388,5364493:0.00688234011413127716)84:0.02562058870590181586,109822014:0.01175064631560202195)43:0.00414522001638514392)65:0.01289303610144888063,116705161:0.00000100000050002909)73:0.02456737701829289633,112729465:0.00225926404160387787)36:0.00648981161287068287,112729464:0.00318342787985347693)44:0.00669714655551762253,115692801:0.04968721241217485124)38:0.00735892726946869163)100:0.12115277394976010916,86460246:0.14131272520656334990)100:0.19146776305631107995,(((44417207:0.20389309077046785523,((5477273:0.00348579190202473639,Ehu-GMC:0.00000100000050002909)81:0.00000100000050002909,110043841:0.00326145828860911497)100:0.32729518567293142128)35:0.02545699118321003915,(101139983:0.25686063063066039147,1070153:0.28943767169912199000)30:0.01953803965013181307)81:0.05859837623527849870,((((((34828956:0.03588057945203371180,(34828957:0.00410533068668167845,41185939:0.00920363154480883551)100:0.02880341387132151487)100:0.04495586734000852486,(88594881:0.01260965570217026030,(51902812:0.00000100000050002909,(95129187:0.00000100000050002909,100911230:0.00199463509571673643)100:0.00531255516236830896)64:0.00476632962846155594)72:0.01849910177083799803)100:0.21801155940700256419,53484400:0.17606523319696845697)31:0.02380709319839598853,(MMseqs2-260:0.10978266486531268464,(86475228:0.08693007941509410530,MMseqs2-15:0.12430044108392084012)24:0.00621118242987140062)72:0.04716656672448892029)88:0.06501536235348703840,(Chry-GMC:0.17216112716799705784,9377863:0.15880780312004030841)61:0.04611573945044361578)54:0.02723136344091147895,101194047:0.24354160441973060625)99:0.09420682883509137739)51:0.03471337784789484127)100:0.21116060021338600716)18:0.04757810601141075624)34:0.05553429993964095063,(((51825974:0.30521803649165457628,(9288719:0.28324059826117858885,(9525881:0.13643157596923907726,9480839:0.13141042308800238159)100:0.16973946868605546690)70:0.06434492551107764968)61:0.04155870492552661555,116669807:0.32494298216279288161)81:0.07042631152790664040,(((65816494:0.24670539116155498771,((54889508:0.16090440976386446992,(50827628:0.00000100000050002909,51823360:0.00497386537306864027)35:0.00000100000050002909)99:0.04134956181531144331,((50854433:0.07453861385635457415,(((95546172:0.00000100000050002909,(34860853:0.00000100000050002909,(32629575:0.00000100000050002909,32276484:0.00000100000050002909)97:0.00000100000050002909)83:0.00400633532786480191)100:0.02995185939544171491,(40728245:0.00000100000050002909,48920226:0.01065227458062658478)100:0.09253321188596190516)37:0.01208306291752607106,(46497577:0.00000100000050002909,(45636988:0.00164542206914790345,(82281508:0.00000100000050002909,((78183543:0.00000100000050002909,76473747:0.00161199735566955977)78:0.00322961916701473319,41188281:0.00000100000050002909)27:0.00161430836849756369)48:0.00166265595175072605)32:0.00000100000050002909)99:0.07424966738074180450)30:0.00941808857438688855)57:0.02859593366928491268,(56983000:0.03549235170434639208,(53444378:0.00000100000050002909,44088452:0.00000100000050002909)100:0.06399921551482118387)97:0.03089692431760459115)50:0.02574011009696440880)100:0.27417394625880758818)100:0.19421364867706039647,(((((26986352:0.03937764683534207555,66323054:0.03738974730831478438)100:0.06244202442104909018,((52837172:0.03862036107506514743,105170748:0.03908877531189253185)100:0.09152082296896585367,(51109475:0.04865894896430744687,(64712795:0.00000100000050002909,64007966:0.00000100000050002909)100:0.04047687824504796889)94:0.05088796118912992245)81:0.04371658173768720040)100:0.16016811694326388293,((72108616:0.32718677320316208457,(65816066:0.05241394415956315139,(65942239:0.01888432061788724095,65802654:0.01797333621058777586)100:0.04134990389781850045)100:0.12337907750471423241)32:0.04224257207091835359,((97429747:0.22991890563093148048,((18692122:0.02761553904133038501,4528847:0.03873592692739866866)100:0.14999550745676790142,((67928406:0.00487235766249347318,(88937776:0.00836115672755237925,56375169:0.01450412765038200553)70:0.00708356534635277719)100:0.12295655807901012535,(56402010:0.02921413520684956050,((56345353:0.03600679657194531813,(44292113:0.02386558678891460838,44409163:0.04118332110249146860)77:0.01769164395764127179)98:0.04247227821257971297,(56788639:0.00234358290285804080,56329824:0.00267181966243258380)100:0.04941534378391769511)72:0.01902310897559039704)97:0.04487276961005663006)100:0.10610330430948448910)46:0.02674024036930292697)65:0.03901098401956362705,(115918384:0.13358469647554321869,110002869:0.11412796169664006507)99:0.08651257477128007634)16:0.02076361614060598035)34:0.03743797407154604573)40:0.03435450907676640409,(63419576:0.29975844781292454444,(((57094970:0.00323210942318899030,88606846:0.00000100000050002909)100:0.04208641087935825753,(59821895:0.00347910468744618354,8213673:0.00000100000050002909)100:0.05160181238674742960)100:0.21864946940411505993,(62684973:0.25250687740018024074,(71800925:0.14121311298300484594,25377605:0.15603197972496957169)95:0.07711015961289105491)70:0.03021808869987394411)45:0.02192203173118124557)100:0.06249068958910654337)68:0.04597094475343957432,(18170693:0.00663882290070740705,(51695920:0.01034102715958642484,54946517:0.00000100000050002909)82:0.00000100000050002909)100:0.32381444565215361520)81:0.04995308833796842374)84:0.07151443878916145802,(((23083377:0.00000100000050002909,MMseqs2-24:0.00370955264743619848)100:0.13459245025014182628,(MMseqs2-53:0.00000100000050002909,53422642:0.00000100000050002909)100:0.11311898036248470290)100:0.09762588068304085820,((115097845:0.01177572022292904148,116110556:0.01407619191458821077)100:0.17175559351794392193,(((112829216:0.20510275280909867623,36794477:0.31599904215164609234)87:0.08276907952607148733,112803968:0.19612318910486351009)25:0.01099614684427361114,(((116420004:0.16563017720414155431,(113633613:0.00170832894486124378,MMseqs2-51:0.00000100000050002909)100:0.20527679539745488646)27:0.02829669322275968346,(((94737353:0.17964571599233655763,Ptr:0.11297788295959398930)97:0.04585118197600250578,((84009611:0.04349827444034293916,84015839:0.08959826774800094817)46:0.00775422671781097420,(((((116782156:0.00000100000050002909,Frc-GMC:0.00000100000050002909)76:0.00000100000050002909,115651140:0.00000100000050002909)100:0.04018636650428147883,((MMseqs2-48:0.00000100000050002909,112862145:0.00000100000050002909)100:0.03124844052205956457,(97583906:0.04314620394619510940,96994444:0.05992758291287011985)68:0.01516720127450571672)86:0.01694965262075314935)91:0.02776512426533890576,((112395599:0.04204331500438487912,83998391:0.04279936250667232267)55:0.01402182707945750714,113906562:0.05448261383632418964)6:0.00189036565116169745)17:0.00700231611760503570,Psm-GMC:0.03805283322767111231)19:0.00777138609331592522)100:0.07453775290710920598)94:0.02946510039498533018,(MOB04319.1:0.13196573723618010288,(116393709:0.00000100000050002909,116393708:0.00496439756414248767)100:0.16448211542414978292)100:0.07138511021941484902)75:0.02362310782883709007)32:0.01633479111030533212,(44283221:0.08054325807681132765,(6159518:0.07463745225385101656,(112381351:0.00351742290448283203,112919685:0.00000100000050002909)100:0.09915291658581018575)96:0.03324405715826684454)96:0.05014829536912535080)32:0.01575245718987839522)90:0.05730900998201481772)96:0.06598269789335003965)100:0.25028943306486861609)50:0.03818450917577888987)69:0.06771057949491002259)28:0.06792061447280871300)74:0.10587818118764596997)92:0.12461374694533769447,(Q7X2H8:0.87990012109198478818,(Q5NT46:1.01026187679002488196,E4QP00:1.13838719099825436132)75:0.21880226840520120013)92:0.12461374694533769447);
