# Supplementary material
Source: MDPI journal article supplement (https://www.mdpi.com/2073-4344/10/9/1072)
Supplement: s1 [file s1 › catalysts-923799-sm-r1/Supplementary Dataset 7.xlsx]

## Sheet: Sheet1
Short name	Organism	Genbank/Uniprot ID
Aa	Aureococcus anophagefferens	XP_009037277.1
Bbr	Botryococcus braunii	Bobra.0021s0023.1 *
Chcr	Chondrus crispus	XP_005714951.1
Chl68	Chlamydomonas sp.	**
Chlch	Chlamydomonas chlamydogama	**
Chles	Chlamydomonas eustigma	GAX83712.1
Chlle	Chlamydomonas leiostraca	**
Chry	Chrysochromulina tobinii	KOO25289.1
Chrzo	Chromochloris zofingiensis	Cz10g26110.t1 *
Chve	Chromera velia	**
Cme	Cyanidioschyzon merolae	XP_005537774.1
Cpr	Chloropicon primus	QDZ18370.1
Cr	Chlamydomonas reinhardtii	XP_001703004.1
Cs	Coccomyxa subellipsoidea	XP_005642926.1
Cso	Chlorella sorokiniana	PRW60107.1
Cv	Chlorella variabilis	A0A248QE08
Dus	Dunaliella salina	KAF5834678.1
Ehu1	Emiliania huxleyi	XP_005785285.1
Ehu2	Emiliania huxleyi	XP_005757666.1
Esi	Ectocarpus siliculosus	CBJ25560.1
Fra	Fragilaria radians	MOB04319.1
Frc	Fragilariopsis cylindrus	OEU15591.1
Gpe	Gonium pectorale	KXZ47408.1
Grc	Gracilariopsis chorda	PXF43763.1
Gsu	Galdieria sulphuraria	XP_005706847.1
Hla	Haematococcus lacustris	GFH06812.1
Lobi	Lobosphaera incisa	**
Mic	Micractinium conductrix	PSC67760.1
Nga	Nannochloropsis gaditana	EWM27492.1
Nsa	Nannochloropsis salina	TFJ85498.1
Pic1	Picochlorum sp.	**
Pic2	Picochlorum sp.	**
Picoc	Picochlorum oculata	**
Picok	Picochlorum oklahomensis	**
Picsa	Picocystis salinarum	**
Ppu	Porphyridium purpureum	KAA8494096.1
Psm	Pseudo-nitzschia multistriata	VEU45243.1
Ptr	Phaeodactylum tricornutum	XP_002178042.1
Pum	Porphyra umbilicalis	OSX75970.1
Pye	Pyropia yezoensis	QDM14404.1
Ras	Raphidocelis subcapitata	GBF88787.1
Tso	Tetrabaena socialis	PNH05783.1
Ulmu1	Ulva mutabilis	**
Vc	Volvox carteri f. nagariensis	XP_002948047.1
* Phytozome IDs
** Accession numbers unavailable; sequences may be found in Supplementary Dataset 8
