# Supplementary material
Source: MDPI journal article supplement (https://www.mdpi.com/2073-4344/10/9/1072)
Supplement: s1 [file s1 › catalysts-923799-sm-r1/Supplementary Dataset 8.fasta]

>PNH05783.1
------------------------------------------------------------
------------------------------------------------------------
------------------------------------------------------------
------------------------------------------------------------
------------------------------------------------------------
------------------------------------------------------------
------------------------------------------------------------
------------------------------------------------------------
------------------------------------------------------------
------------------------------------------------------------
------------------------------------------------------------
------------------------------------------------------------
------------------------------------------------------------
------------------------------------------------------------
------------------------------------------------------------
------------------------------------------------------------
---------------------MN-------------------------------------
------------------------------------------------------------
--------------------------ET--A------------RK---------------
---------------------------------GV-------------------------
-------------VEV---------------DGT--------------------------
-------------------------------------------------------LRI--
-------------VP---------RRYWFLPYSWFLPSA--VP----LEGTV------TM
---------------------HIKS--------------------------WNDKVARVQ
ER------FFNIPTIIPVPV---RWLVGWAVGTAGVLSEP-ALAQL---------YD-W-
YSAG---YS-----GVQG---------------GV----------EQALQSA--------
----PV--------------AAAVEKAEGLR-----------------------------
---GSVAE--G--------------------------------------------VQAAK
AK-VLEGETFPGVRAS-----SDKDIDEYVRRT--VHSGNALVGTCAMGAS---------
--AA-A----GA--------------VVSSADLKVF-GVAGLRVVD----ASV----IPT
L------PG----GQTG----AATVMVAERAAALLLGKAAIASAR---------------
---QQPVAV---------------------------------------------------
------------------------------------------------------------
------------------------------------------------------------
------------------------------------------------------------
------------------------------------------------------------
------------------------------------------------------------
------------------------------------------------------------
------------------------------------------------------------
------------------------------------------------------------
------------------------------------------------------------
-------------------------------------
>Cr-FAP
------------------------------------------------------------
------------------------------------------------------------
------------------------------------------------------------
------------------------------------------------------------
------------------------------------------------------------
------------------------------------------------------------
------------------------------------------------------------
------------------------------------------------------------
------------------------------------------MMLGPKTVT---RGATKG
AA--------------PRSMAARRVGGARRL-----------SV-RAAAGP---------
---AGSEKFDYVLVGGGTA------------SCVLANK----------------------
---LSA-D---------------------GNK-----KVLVLEAGP-TGDA---------
-------------------------------------------MEVAVPAGITRLFA-HP
VMDWGMSSLTQK-----QL-VAR-EIYL-----ARGR-----------------------
-MLGGSSGSN---------------------------ATLYHRGSAADYD----------
---------AW------GLEGWSSKDVLDWFVKAECY-ADG-------------------
PKPYHGT---GGSMNTEQPRYENV-LHD--------------------EFFKAA-A----
----A-TGLPA-NPDFNDWSHPQD-------------GFGE-------------------
----FQVS-QKKGQRADTYRTYL---KP--AMA----------RGN-LKVVIGARATKVN
IEKGSS----------------------GARTTGVEYAMQ---------------QFGDR
FTAELA-----PGGEVLM------------CSGA-----VHTPHLLMLSGVGPAATLKEH
GIDVVSDLSGVGQNLQDHPAAVLAA----------RA-KPEFEKL----SVTSE-VYD--
--------DK-CNI------------KLGAVAQYLFQRR--GP----LATT---------
GCDHGA---------------FVRTSS--SL-----------------------SQPDLQ
-------------------M---RFVPGCALDPDGVKSYI-VFGEL---KKQGR--A-W-
-PGG---ITLQLL-AIRA-----------KSK-G-----------SIGLKAADPFI-N--
----PAININYFSDP-----ADLATLVNAVK-----------------------------
---MARKI--A--------------------------------------------AQEPL
KK-YLQEETFPGERAS-----SDKDLEEYIRRT--VHSGNALVGTAAMGAS---------
--PA-A----GA--------------VVSSADLKVF-GVEGLRVVD----ASV----LPR
I------PG----GQTG----AATVMVAERAAALLRGQATIAPSRQPVAV----------
------------------------------------------------------------
------------------------------------------------------------
------------------------------------------------------------
------------------------------------------------------------
------------------------------------------------------------
------------------------------------------------------------
------------------------------------------------------------
------------------------------------------------------------
------------------------------------------------------------
------------------------------------------------------------
-------------------------------------
>XP_005706847.1
------------------------------------------------------------
------------------------------------------------------------
------------------------------------------------------------
------------------------------------------------------------
------------------------------------------------------------
------------------------------------------------------------
------------------------------------------------------------
------------------------------------------------------------
------------------------------------------------------------
------------------------------------------------------------
------------------------------------------------------------
------------------------------------------------------------
------------------------------------------------------------
------------------------------------------------------------
------------------------------------------------------------
------------------------------------------------------------
------------------------------------------------------------
------------------------------------------------------------
------------------------------------------------------------
----MG---------------------SAPRALGVSYINA----------------NGER
ERAMIR-------KEVIL------------SAGA-----YGSPQLLMLSGIGPPDILAPL
GIPVVMPLHGVGKNLQDHCAVLFSC----------KS-PNPSEDR----KHRDL-YYT--
--------EE-TGK------------DWKTILTWVVAGK--GP----LTST---------
MCEAGA---------------FLKTNP--IF-----------------------NDPDLQ
-------------------L---RFIPFFS-EADPYFSLS-DYSSKGMFFKNRS--H-R-
-PSG---FTIQSV-AIRP-----------KSR-G-----------RLTIQSKDPRM-L--
----PIIESGWFSSQ-----EDLETLLRGIS-----------------------------
---LSQKL--V--------------------------------------------HASPL
AS-YFGEQCFPSTGLS-----KKEDIIRYISST--CHTANAVVGTCRMG-----------
--TD-K----QA--------------VVNP-NLQVM-GVERLRVL---------------
--------------------------------------LQL-------------------
------------------------------------------------------------
------------------------------------------------------------
------------------------------------------------------------
------------------------------------------------------------
------------------------------------------------------------
------------------------------------------------------------
------------------------------------------------------------
------------------------------------------------------------
------------------------------------------------------------
------------------------------------------------------------
-------------------------------------
>Ehu2
------------------------------------------------------------
-----------------------MSA----------------------------------
------------------------------------------------------------
------------------------------------------------------------
------------------------------------------------------------
------------------------------------------------------------
------------------------------------------------------------
------------------------------------------------------------
---------------------------------------RWLLLLAT-------------
---------------------------------------HCSAA-LRNPFR---------
---AAPTHFDYIIVGGGTA------------GCVLADR----------------------
---LSA-----------------------ASK-----QVLVLEPGP-SPAA---------
------------------------------------------ELKIAAPVALTKLFG-SE
-YDWGFRSAPAP-----GT-AGR-EVHL-----CRGK-----------------------
-CLGGSSATN---------------------------ALLYLRGTAADFD----------
---------GW------GLDGWGSEAMLASFLAVEAQ-RDAA---------------FRT
DALHHGS---GGAVPAETPRYANP-LSE--------------------RFLEAA-A----
----Q-AGHPS-NADFNDWSRPQA-------------GVGR-------------------
----FQLT-TRRGRRAHSAATHL---RR--AAR----------RPN-LHVRCGCAATRLL
LEAEGGGGGGGGGGKTRPWTGPAVTGQAGRRAVGVEYIDA----------------AGVQ
RTASVSGGGGGGGGEVLL------------CAGA-----VSSPHLLLLSGIGSPDELAAH
GIGAEVCLPGVGRNLIDQPAVVTGY----------TV----TSPL----SITDE-MFW--
--------RR-SGAL-----------SPRRVGEWLLRGS--GP----LASS---------
GCDFGG---------------FFSSRP--GL-----------------------AQPDLQ
-------------------L---RFVPGLGTSPDGVSSYR-DIGRA---G------K-T-
-PSG---LTLQSI-AVRP-----------TAR-G-----------SVSLSSADPSA-P--
----PRIETGYGTSE-----ADLATLRQGLR-----------------------------
---LSREL--V--------------------------------------------AQPAF
DG-VRGEEAWPRAACRLRRPGDDAALDEYIRST--AHSANALGGSCRMGRATSPARLVE-
-GSD-P----LA--------------VVDP-ALRVR-GASGLRVVD----ASV----LPT
L------PG----GQLG----ATTFALAERAARIILGERAAGEAEAPAE-----------
-RRQEHAHA---------------------------------------------------
----------------------------------------LGAA----------------
------------------------------------------------------------
------------------------------------------------------------
------------------------------------------------------------
------------------------------------------------------------
------------------------------------------------------------
------------------------------------------------------------
------------------------------------------------------------
------------------------------------------------------------
-------------------------------------
>Ehu-GMC
------------------------------------------------------------
------------------------------------------------------------
------------------------------------------------------------
------------------------------------------------------------
------------------------------------------------------------
------------------------------------------------------------
------------------------------------------------------------
------------------------------------------------------------
---------------------------------------MVALFALQLA-----------
---------LSPPQARLGSGSARAALRLRGGSGV----TGGSLG-RGGGSP---------
---AIDGEFDYIIVGGGAA------------GCVLANR----------------------
---LSA-D---------------------PAH-----RVLLIEAGG-DASR---------
------------------------------------------DKRAQVPWAFTKLLR-SE
-YDWDFHVEAEA-----AV-NQQ-EVYL-----CRGK-----------------------
-ALGGSSVTN---------------------------VMLYHRGSPADYD----------
---------AWEEA---GARGWGAKDVLPYYLRVEDY-GDG-------------------
ASQYHAV---GGHVSVQEVPYQNQ-LSA--------------------TFLRAM-G----
----Q-LGFRP-NGDFNDWSSPQE-------------GYGR-------------------
----YKVT-QRAGRRCTAADGYL---AA--ARE----------RAN-LVVVTGAQATRLA
LDSAYDG-------------------AGRLQVSGVEFARG---------------DEREP
CSVRLA-----RGGEAVL------------CAGA-----VQTPHLLLLSGIGPAEHLREV
GVPVRADLPGVGSGLQDHPAVVVSY----------ES----KKAV----AATDD-ALL--
--------KGYASLV-----------NPLAMLRWLLFGR--GP----LACA---------
ACDHGG---------------FVRSSP--DL-----------------------DQPDVQ
-------------------I---RFVPARASSASGMNTLI-ELGRR---A------R-F-
-LPG---FSTQVV-ACRP-----------RSE-G-----------RVRLRSADPFA-K--
----PIIEGIHLGAA-----EDVASLRHGIR-----------------------------
---LGRQV--C--------------------------------------------AAAAF
DE-YRGEEVFPGAAVQ-----SDEQIDEYIRSS--VHSANALTSSCRMGDP---------
--SD-P----AA--------------VLDS-HLRVR-GVGGLRVAD----ASA----MPR
I------IG----GQTQ----APTYMLAERAADILLHARLQAHEPATESVSQRLEV----
AAAA------------------------------------------------------L-
------------------------------------------------------------
------------------------------------------------------------
------------------------------------------------------------
------------------------------------------------------------
------------------------------------------------------------
------------------------------------------------------------
------------------------------------------------------------
------------------------------------------------------------
------------------------------------------------------------
-------------------------------------
>5NCC_A
------------------------------------------------------------
------------------------------------------------------------
------------------------------------------------------------
------------------------------------------------------------
------------------------------------------------------------
------------------------------------------------------------
------------------------------------------------------------
------------------------------------------------------------
------------------------------------------------------------
----------------------------SASAVE----DIRKVL-SDSSSP---------
---VAGQKYDYILVGGGTA------------ACVLANR----------------------
---LSA-D---------------------GSK-----RVLVLEAGP-DNTS---------
-------------------------------------------RDVKIPAAITRLFR-SP
-LDWNLFSELQE-----QL-AER-QIYM-----ARGR-----------------------
-LLGGSSATN---------------------------ATLYHRGAAGDYD----------
---------AW------GVEGWSSEDVLSWFVQAETN-ADFG------------------
PGAYHGS---GGPMRVENPRYTNKQLHT--------------------AFFKAA-E----
----E-VGLTP-NSDFNDWSHDHA-------------GYGT-------------------
----FQVM-QDKGTRADMYRQYL---KP--VLG----------RRN-LQVLTGAAVTKVN
IDQAAG----------------------KAQALGVEFSTD--------------GPTGER
LSAELA-----PGGEVIM------------CAGA-----VHTPFLLKHSGVGPSAELKEF
GIPVVSNLAGVGQNLQDQPACLTAA----------PV-KEKYDGI----AISDH-IYN--
--------EK-GQI------------RKRAIASYLLGGR--GG----LTST---------
GCDRGA---------------FVRTAG--Q------------------------ALPDLQ
-------------------V---RFVPGMALDPDGVSTYV-RFAKF---QSQGL--K-W-
-PSG---ITMQLI-ACRP-----------QST-G-----------SVGLKSADPFA-P--
----PKLSPGYLTDK---DGADLATLRKGIH-----------------------------
---WARDV--A--------------------------------------------RSSAL
SE-YLDGELFPGSGVV-----SDDQIDEYIRRS--IHSSNAITGTCKMGNA---------
--GD-S----SS--------------VVDN-QLRVH-GVEGLRVVD----ASV----VPK
I------PG----GQTG----APVVMIAERAAALLTGKATIGASAAAPA-----------
-----TVAA---------------------------------------------------
------------------------------------------------------------
------------------------------------------------------------
------------------------------------------------------------
------------------------------------------------------------
------------------------------------------------------------
------------------------------------------------------------
------------------------------------------------------------
------------------------------------------------------------
------------------------------------------------------------
-------------------------------------
>Mic-GMC
MAEMAG---GGEGDGMLMGGAGSANTTDACYSDPSNPDCAAFERSDDDWAADIELLCSAM
PFMPGCTLAEQCMNGTAAGEYCEMSSLAGNICLDMPGMKGCEAWNALCGAASAVEQCSSP
GPVVALPTTALAKEGLESLCSTHCMDGCPDCEMGKLWNTCTDPLSVLAWMCYAMPDMPEC
LAAPQGSGMVVACGDAEVAATFPLVCAQPPTPAANFQHRLRTCRTAGVAASASGSPAVTM
AGLSTVLAVLALLPSPVAMAMTPMPTPALAPGPAIDDIGGNCPLLGRGNMEAPCYSDPSA
AACVSFERSDAGWADDLSQLCSAMPYAVGCWLWHLCKTGAASGTYCALPSLTANVCVDAP
LVNATSAPGCEAWAALCGAQGSVVAQCSAPGPLPDIINTLTTRDGINSLCGMHYMDGCNE
CTPHEGPAVHDFAACADPGPLPTLAHQCYAMPEMGECTQTGITAMCSGAEARATFPTVCV
DPPNPTTLAPAPAVSACDVAAGAGAPPAASARPAS--HSRASLVASRSGFCAPSPALRSQ
RT-------------STVAPARRAASAPRASAVD----DIQRAL-STAGSP---------
---VSGKQYDYILVGGGTA------------ACVLANR----------------------
---LTA-D---------------------GSK-----RVLVLEAGA-DNVS---------
-------------------------------------------RDVKVPAAITRLFR-SP
-LDWNLFSELQE-----QL-AAR-QIYM-----ARGR-----------------------
-LLGGSSATN---------------------------ATLYHRGAAADYD----------
---------AW------GVPGWGAADVLPWFVKAETN-AEFA------------------
AGKYHGA---GGNMRVENPRYSNPQLHG--------------------AFFAAA-Q----
----Q-MGLPQ-NTDFNNWDQDHA-------------GFGT-------------------
----FQVM-QEKGTRADMYRQYL---KP--ALG----------RPN-LQVLTGASVTKVH
IDKAGG----------------------KPRALGVEFSLD--------------GPAGER
MAAELA-----PGGEVLM------------CAGA-----VHSPHILQLSGVGSAATLADH
GIAAVADLPGVGANMQDQPACLTAA----------PL-KDKYDGI----SLTDH-IYN--
--------SK-GQI------------RKRAIASYLLQGK--GG----LTST---------
GCDRGA---------------FVRTAG--Q------------------------ALPDLQ
-------------------V---RFVPGMALDADGVSTYV-RFAKF---QSQGL--K-W-
-PSG---ITVQLI-ACRP-----------HSK-G-----------SVGLKNADPFT-P--
----PKLRPGYLTDK---AGADLATLRSGVH-----------------------------
---WARDL--A--------------------------------------------SSGPL
SE-FLEGELFPGSQVV-----SDDDIDSYIRRT--IHSSNAIVGTCRMGAA---------
--GE-A----GV--------------VVDN-QLRVQ-GVDGLRVVD----ASV----MPR
I------PG----GQVG----APVVMLAERAAAMLTGQAALAGASAAAP-----------
---PTPVAA---------------------------------------------------
------------------------------------------------------------
------------------------------------------------------------
------------------------------------------------------------
------------------------------------------------------------
------------------------------------------------------------
------------------------------------------------------------
------------------------------------------------------------
------------------------------------------------------------
------------------------------------------------------------
-------------------------------------
>Grc-GMC
------------------------------------------------------------
-----------------------MFS----------------------------------
------------------------------------------------------------
------------------------------------------------------------
-------------------------GPTIP------------------------------
-------------------------------------TFV-------------------P
LPSIF------------HASKL--------------------------------------
------------------------------------------------------------
-----------------------------------------SSTFTHTVSRSHRPAHV-V
PPT------RTPITNAAPADTISETLPR-------------------TATS---------
---PPSQSFDYVIIGGGAA------------GCVLANR----------------------
---LSA-N---------------------GKT-----RVLLLEAGP-PDDS---------
-------------------------------------------FYLRVPLGFPYLLG-SK
-HDWAFVTEPEP-----HL-NGR-RLYF-----PRGK-----------------------
-VLGGSHAIS---------------------------VMLYHRGNAADYE----------
---------SWP-------EGWHAEDVLPYFKRSEGQ-RAAL----------------KQ
QSAAHSC---NGPLAVDDLARVNP-MSS--------------------AFVDAA-V----
----Q-CGLQR-NDDFNDWERSQD-------------GVGI-------------------
----FQVT-QRDGNRESPATAYL---NS--IRA----------RRN-LTVQTGVTVERII
FEQGNG----------------------VPRASGVSYVKA----------------DGNR
--ATVK-----AEKEVLL------------SAGV-----YASPQLLMLSGVGPAEHLEGM
GIPIVADVPAVGQNLQDHAAVMLSY----------ES-QAPQLDK----RNSSV-YYT--
--------ER-TGK------------NIGTILNYIFRGK--GP----LTSP---------
MCEAGG---------------FVKSDG--SM-----------------------GTCDLQ
-------------------L---RFIPFVS-EPDPYHSLA-DFATAGSYLKNES--N-R-
-PAG---FTLQSV-AARP-----------RSR-G-----------WVSLRSTDVRD-S--
----VRIHGNWMADT-----QDLRTLVQGLK-----------------------------
---LCREI--A--------------------------------------------CQDAL
KE-YRGREAYPGKEVV-----SDQALEKYVLNT--CHTANAMVGTCRMGRG---------
--ED-------C--------------AVDS-ELRVR-GVEGLRVID----SSV----MPT
L------PG----GQSG----APTMMIAEKGADLVLQAQQGVSEAVSLSTGTRQV-----
------------------------------------------------------------
------------------------------------------------------------
------------------------------------------------------------
------------------------------------------------------------
------------------------------------------------------------
------------------------------------------------------------
------------------------------------------------------------
------------------------------------------------------------
------------------------------------------------------------
------------------------------------------------------------
-------------------------------------
>Psm-GMC
------------------------------------------------------------
-----------------------MKL----------------------------------
------------------------------------------------------------
------------------------------------------------------------
---------------------QIFKILTL-------------------------------
------------------------------------------------------------
------------------------------------------------------------
------------------------------------------------------------
--------------------------------------LNVAATAS--------------
---------ATTAAGAPPIG------NMNRA--------------HAVEAK---------
---AVEDGYDYIIAGGGLA------------GCLLADR----------------------
---LSA-D---------------------G-K-----KVLVLEAGT-PDYN---------
------------------------------------------SMIVRIPAGILRLFR-NT
KYDWQHETGGEK-----AC-NGR-NVFL-----QRGK-----------------------
-VLGGSSCTN---------------------------VCLHHRGSAQDYD----------
---------DW------GIPGWKASDVLPFFKASQKD-MTDR------------------
SPEFHGK---DGDWVMDXVKYQNP-LSK--------------------RFLEVG-E----
----K-AGLGT-NDDFNNWSRPQE-------------GVGR-------------------
----FQVS-EVNGERCSGAKAFI---SK--ALK----------RKN-CEVRTGTMVRRID
FDG-------------------------SKTATGVTYDLM-------G------DDTMTP
FNAKLN-----DGGEVIV------------TSGA-----IASPQLLMCSGIGPADHLKDH
GIPVVHDNPSVGKNLQDHPAAVVSF----------KT-P--QKGV----SVTSK-LRL--
--------FG-L--T-----------NPFPIIQWLLTKT--GL----LTST---------
GCDHGA---------------FVRTSA--SS----------------------RGQPDLQ
-------------------I---RFLAALALGPDGMTTFT-QFRNK---K------N-H-
-ADG---YSFQSV-ACRA-----------KSK-G-----------CVRLASSNTHV-K--
----PKIDGGYLSDP-----ADLKTLREGIK-----------------------------
---LGRQL--G--------------------------------------------NRPEW
GE-YLGEEVYPGIDVQ-----TDAQIDEYIKNT--IHTANALTGTCKMGTG---------
--KD-------A--------------VVSP-DLKVI-GVNGVRVAD----SST----LPN
I------PG----GQTA----TPTVMIAERAAAFLRSPQQSVTTTT--------------
------------------------------------------------------------
------------------------------------------------------------
--------------------EVI--------------------MEE--------------
------------------------------------------------------------
------------------------------------------------------------
-------KAV--------------------------------------------------
--------------------EEPAPE----------------------------------
------------------------------------------------------------
------------------------------------------------------------
------------------------------------------------------------
--LAA-------------------------------A
>Nsa-GMC
------------------------------------------------------------
-----------------------MSS----------------------------------
------------------------------------------------------------
------------------------------------------------------------
------------------------------------------------------------
------------------------------------------------------------
-------------------NGYLRAY----------------------------------
------------------------------------------------------------
-------------------------------------HLLIALLISANAFLITPPRLSKT
TI-------GLQSFVTANYGVRRAISLR---------GGLQSVS-MKAPAA---------
---VASSTYDYIIVGGGIG------------GCVLANR----------------------
---LTE-S---------------------GRF-----KVLLLEAGK-SAER---------
------------------------------------------NPYVNIPAGVVRLFK-SA
-LDWQFESAPER-----HL-DGK-EVYL-----VRGK-----------------------
-AMGGSSAVN---------------------------VMLVHRGSASDYA----------
---------KWEAE---GAQGWGPEEALRYFKKMEDN-LVGG------------------
EGRWHGQ---GGMYPVDDVKYQNP-LSK--------------------RFLQAC-E----
----E-YGWRA-NPDFNDWSHPQD-------------GYGS-------------------
----FKVA-QKHGKRVTAASGYL---NK--AVRR---------RPN-LDILSEALVTRVL
LEGEG-----------------------NVKAVGVEFTGK---------------DGKAH
QVRTMG-----KAGEVLL------------AGGA-----VNSPQLLMLSGIGPEADLEAV
GIATKVNRPGVGENLQDHPAVTIAH----------NI----TRPI----SLCDD-LFL--
--------FH-TPVP-----------KPHQVLRWTLTGS--GP----LTTP---------
GCDHGA---------------FLKTRE--DL-----------------------QEPNVQ
-------------------F---RFIAGRGSDPDGVRSYI-MGGSA----------R-P-
-LSG---LTLQVV-NIRP-----------KSK-G-----------KLTLASKDPLK-K--
----PRIEVRYLSAA-----EDLQALRTGMR-----------------------------
---IGREL--I--------------------------------------------KQRAF
AD-ILDEEVFPGPAAQ-----TDEELDAYIRDS--LHTANALVGTCKMGSV---------
--ED-R----NA--------------VVDP-ECRVI-GVGGLRVVD----ASV----MPV
I------PG----GQTG----SGTTMLAEKAADLVRAHAGDLVEMGVQDEERKGGWFNGL
LGRKQKAAT---------------------------------------------------
------------------------------------------------------------
------------------------------------------------------------
------------------------------------------------------------
------------------------------------------------------------
------------------------------------------------------------
------------------------------------------------------------
------------------------------------------------------------
------------------------------------------------------------
------------------------------------------------------------
-------------------------------------
>QDZ18370.1
------------------------------------------------------------
------------------------------------------------------------
------------------------------------------------------------
------------------------------------------------------------
------------------------------------------------------------
------------------------------------------------------------
------------------------------------------------------------
------------------------------------------------------------
------------------------------------------MMATTSYRL---------
--------WAQASSKLLSSSKAGGLGSRLQGV----------SR-RLLSTA---------
---TTAGEYNYILVGGGTA------------SCVLAKR----------------------
---LLEAN---------------------PDN-----KILVLEAGS-DDYE---------
------------------------------------------HKYIKVPAAIGRLFK-SD
-KDWDYTSSSSTE-AGLSP-THE-GVYL-----CRGK-----------------------
-VLGGSSCTN---------------------------VLLYNRGSARDYD----------
---------GW------KVPGWSSRDVLQYFKKSENN-H------------------AVS
NDKFHGK---DGPFDVGNVQYTNP-LVD--------------------TFLDAS-V----
----K-MGFRR-NSDFNDWDNGQD-------------GVGP-------------------
----FHVA-QNNGVRSSAASSYL---SG--VQG----------KPR-LEVVTGAHVSKLD
IDAE------------------------NKAARGVNYVK-----------------DGKQ
LSAGIK-----EGGEVIL------------AAGS-----VGSPHLLMLSGIGPKKHLEEH
GIDCVADLP-VGESLQDHPAAVVVY----------TV----DQKV----SVTDE-FKL--
--------FGISNLP-----------SPMPLLKYLLSGT--GP----MTSV---------
GCDYGG---------------FFKTSE--EK-----------------------EDPDLQ
-------------------M---RFIGARAQSPLGISNYR-EYAAKW--L------S-W-
-PSG---YTFQNI-CVRP-----------KST-G-----------HVRLKSSSYKD-K--
----PEISTGYLSSD-----EDVKSLRNGIK-----------------------------
---LSRKL--G--------------------------------------------TSEEF
KK-YNPVELFPGAHVQ-----TDEEIDEYIRNS--AHSGNAVVGSCRMGVN---------
--PK------SA--------------VVDP-ELRVM-GIKALRVVD----SSV----MPV
L------PG----GQTC----SSTLMIAEKGADLLADHA---------------------
------------------------------------------------------------
------------------------------------------------------------
------------------------------------------------------------
------------------------------------------------------------
------------------------------------------------------------
------------------------------------------------------------
------------------------------------------------------------
------------------------------------------------------------
------------------------------------------------------------
------------------------------------------------------------
-------------------------------------
>GFH06812.1
------------------------------------------------------------
------------------------------------------------------------
------------------------------------------------------------
------------------------------------------------------------
------------------------------------------------------------
------------------------------------------------------------
------------------------------------------------------------
------------------------------------------------------------
------------------------------------------------------------
------------------------------------------------------------
------------------------------------------------------------
------------------------------------------------------------
------------------------------------------------------------
------------------------------------------------------------
------------------------------------------------------------
------------------------------------------------------------
------------------------------------------------------------
------------------------------------------------------------
-----------------------------------------------------MRITKLQ
FEHSSSP-------------------GSLPRTVGVEFSPA-------N------DSFGDR
FSAQLA-----PEGQVLL------------CAGA-----VHSPHLLQLSGVGPRQVLAEH
GIPLVADLQGVGANLQDHPATLFAA----------RT-DDKFDNL----AVTSQ-VYD--
--------RS-SNV------------RITALLHYLLQRR--GP----LATT---------
GCDHGA---------------FLSTTG--K------------------------GEPDLQ
-------------------I---RFVPGFALDPDAIQSYI-KFGEN---KKRGI--A-W-
-PCG---ITMQLL-AVRP-----------HSV-G-----------SVGLKSSDPFA-A--
----PAVDIGYYAGD---GEKDLVTLREGLK-----------------------------
---IARRI--A--------------------------------------------EASPL
SE-YGTSERYPGPRAT-----SDADLDEFIRKT--TCSGNALVGTCRMGPA---------
--SD-S----GT--------------VVSHTDMSVH-GVAGLRVVD----ASV----MPR
I------PG----GQTG----APTVMIAERVAAMLVGQQARVGSTPGRGGSQQMA-----
--GRTLVGAA--------------------------------------------------
------------------------------------------------------------
------------------------------------------------------------
------------------------------------------------------------
------------------------------------------------------------
------------------------------------------------------------
------------------------------------------------------------
------------------------------------------------------------
------------------------------------------------------------
------------------------------------------------------------
-------------------------------------
>Ptr
------------------------------------------------------------
------------------------------------------------------------
------------------------------------------------------------
------------------------------------------------------------
------------------------------------------------------------
------------------------------------------------------------
------------------------------------------------------------
------------------------------------------------------------
------------------------------------------------------------
------------------------------------------------------------
--------YDYIICGGGLA------------GCVLAER----------------------
---LSQ-D---------------------ESK-----RVLVLEAGG-SDYK---------
------------------------------------------SLFIRIPAGVLRLFR-SK
-YDWQHETGGEK-----GC-NGR-NVFL-----QRGK-----------------------
-ILGGSSCTN---------------------------VCLHHRGSAEDYN----------
---------SW------NIPGWTATDVLPFFKQSQKD-ETGR------------------
DATFHGA---DGEWVMDEVRYQNP-LSK--------------------LFLEVG-E----
----A-AGLGT-NDDFNNWSHPQD-------------GVGR-------------------
----FQVS-EVNGERCSGATAFL---SK--AAK----------RSN-VIVRTGTMVRRID
FDE-------------------------TKTAKGITYDLM-------G------DDTCTV
--PCLK-----EGGEVLV------------TGGA-----IASPQLLMCSGIGPGKHLRSL
GIPVVHDNSAVGENLQDHPAAVVSF----------KT-P--QKGV----SVTSK-LRL--
--------FG-K--T-----------NPIPVFQWLFFKS--GL----LTST---------
GCDHGA---------------FVRTSD--SL-----------------------EQPDLQ
-------------------I---RFLAARALGPDGMTTYT-KFRTM---K------T-V-
-EDG---YSFQSV-ACRA-----------KSK-G-----------RIRLSSSNSHV-K--
----PMIDGGYLSNQ-----DDLATLRAGIK-----------------------------
---LGRML--G--------------------------------------------NRPEW
GE-YLGQEVYPGPDVQ-----TDEEIDEYIRNS--LHTANALTGTCKMGTG---------
--RG-------A--------------VVGP-DLRVI-GVNGVRVAD----SSV----FPC
I------PG----GQTA----TPTVMIADRAAVFVR------------------------
------------------------------------------------------------
------------------------------------------------------------
------------------------------------------------------------
------------------------------------------------------------
------------------------------------------------------------
------------------------------------------------------------
------------------------------------------------------------
------------------------------------------------------------
------------------------------------------------------------
------------------------------------------------------------
-------------------------------------
>CBJ25560.1
------------------------------------------------------------
-----------------------MVA----------------------------------
------------------------------------------------------------
------------------------------------------------------------
------------------------------------------------------------
------------------------------------------------------------
------------------AQGLM-------------------------------------
------------------------------------------------------------
---------------------------------------AMAMCAVSSAFMLAPTPMS--
---------IPSTISRSARGTTRVPAARYAT--------------SSVSMS---------
---VAEEGHKFIIIGGGTA------------GCVLANR----------------------
---LSA-D---------------------KDN-----SVLVLEAGS-EKFN---------
------------------------------------------DRNIKMPIAILRLFK-SV
-FDWGFQSENEK-----FA-TGD-GIYL-----CRGK-----------------------
-VLGGSSCTN---------------------------VMLYHRGEEADYD----------
---------AW------GVDGWKGKDVLPYFKKAENN-RSKK------------------
KGEFHGK---GGLMQVENARYMNP-LTK--------------------LFFKAC-E----
----Q-AGLSE-NEDFNDWSHSQE-------------GFGR-------------------
----FQVA-QKRGKRCSAASSYL---KE--AMG----------RKN-LDVQTSAQITKVL
IEN--------------------------GGAIGVEYVR-----------------DGEK
KIAKLA-----VGGEILL------------AGGA-----ISSPQVLMLSGVGPAEHLRSK
GIEVKSNVPGVGKNLRDHPAVTVMA----------DI----NKPI----SITDK-VLK--
--------EG-SGDV-----------NKITALQWLLTGT--GP----LTSP---------
GCENGA---------------FFKTTP--DK-----------------------AAADLQ
-------------------L---RFVPGRSTTPDGVKAYN-TIGTK---G------R-P-
-PSG---VTVQVV-GIRP-----------QSE-G-----------HVELRSSDPFD-K--
----PHIVTNYLESG-----EDMASLTNGIE-----------------------------
---MARKL--F--------------------------------------------DQEAF
GE-MVDKEVFPGR--------DNKEISEYIKST--VHSANALVGTCKMGEE---------
--SD-N----MS--------------VVNS-ALKVK-GVAGLRVID----SSV----MPS
I------PG----GQTA----APTIMIAEKAADMLMA-----------------------
------------------------------------------------------------
------------------------------------------------------------
------------------------------------------------------------
------------------------------------------------------------
------------------------------------------------------------
------------------------------------------------------------
------------------------------------------------------------
------------------------------------------------------------
------------------------------------------------------------
------------------------------------------------------------
-------------------------------------
>Vc-GMC
------------------------------------------------------------
------------------------------------------------------------
------------------------------------------------------------
------------------------------------------------------------
------------------------------------------------------------
------------------------------------------------------------
------------------------------------------------------------
------------------------------------------------------------
------------------------------------------MLLGQRPFG--APAKGAM
PC-------------WKAARHGGVAGVARRP-----------VA-VKAAAS---------
---VGSEKFDYILVGGGTA------------GCVLANK----------------------
---LSA-N---------------------GSK-----KVLVLEAGP-TGDA---------
-------------------------------------------MEVAVPAGIARLFA-HP
VFDWGMSSLTQQ-----QL-VAR-EIYL-----ARGR-----------------------
-LLGGSSGTN---------------------------ATLYHRGTPADYD----------
---------SW------GLEGWTSKDLLDWFVKAECY-GDG-------------------
PRAFHGQ---SGSMNVEQPRYQNV-LHD--------------------EFFRAA-A----
----A-AGLPA-NEDFNDWSRPQE-------------GYGE-------------------
----FQVA-QKNGERADTYRTYL---KP--AMG----------RDN-LKVMTGARTTKVH
IEKSST----------------------GPRARGVEYATQ---------------QFGER
YTAELT-----PGGEVLM------------CTGA-----VHTPHLLMLSGIGPAPTLLEH
GLDVISSLPGVGANLQDHPAAVLAV----------RA-KPEFEGL----SVTSE-IYD--
--------SK-CNI------------RLGAVMKYLFGRR--GP----LATT---------
GCDHGA---------------FVRTSA--SH-----------------------SQPDLQ
-------------------M---RFVPGCALDPDGVKSYI-VFGEL---KKQGR--A-W-
-PGG---ITLQLL-GIRA-----------KSR-G-----------SIGLKAADPFI-N--
----PAININYFSDP-----EDLATLKNGVR-----------------------------
---IAREI--V--------------------------------------------AQEPL
RK-YLLEETFPGERAN-----TDKDIEEYVRRT--VHSGNALVGTCAMGTT---------
--PA-S----GA--------------VVSSADLKVF-GVDGLRVVD----ASV----LPR
I------PG----GQTG----AATVMVAERAAAMLLGQATITSRREPAAV----------
------------------------------------------------------------
------------------------------------------------------------
------------------------------------------------------------
------------------------------------------------------------
------------------------------------------------------------
------------------------------------------------------------
------------------------------------------------------------
------------------------------------------------------------
------------------------------------------------------------
------------------------------------------------------------
-------------------------------------
>Cme
------------------------------------------------------------
-----------------------MRS----------------------------------
------------------------------------------------------------
------------------------------------------------------------
------------------------------------------------------------
------------------------------------------------------------
------------------------------------------------------------
------------------------------------------------------------
---------------------------------------RYCFLLSSTPCK-----YAGQ
RSPFP----ASALAGVCAGGRLRNVTRNLRPGLRT---LRASAE-TEHSQG---------
---TRQAQYDFIIVGAGAA------------GCVLANR----------------------
---LSTAQFSN------------------GDR--RYPRVLLLEAGD-ALAEA--------
------------------------------------------PYFEHIPLGFPQLIG-SR
-LDYGFFSRENPT----HL-GGRGAVYL-----PRGR-----------------------
-GEGGSHAIS---------------------------VMLVHRGSRHDYE----------
---------TWVKD--YEALGWGPDDVLPYFKRLESN-ERTAQRGAD----------GEA
ATALHGS---DGPLRVSDQRSPNP-LSL--------------------AFIEAC-L----
----E-RGIRR-NKDFNDWDHGQE-------------GAGL-------------------
----FQVT-QRDGRRESPATAYL---QP--VRS----------RRN-LHIETNALAEHLV
WSK------------------------DGRRVEGIRFIDR----------------HGRR
RAAL-------AHCEVIL------------AAGA-----INTPQLLMLSGLGPGAHLQDF
GIPVVRDLPGVGQNLQDHAAVMLSY----------YA-PDPYGKD-R--DKKRI-FYT--
--------ER-LGK------------DPLVLAEYFLLGR--GP----LTSP---------
VCEAGA---------------FVHTQA--VI---------------------GEPSCDLQ
-------------------L---RFVPFFS-DADPYKSLG-EYRSGGHVLTNTS--I-R-
-PAG---FGLQAV-AIRP-----------RSR-G-----------RIELATIDPRA-R--
----PIIHTGWLEDK-----RDLQTLLSGLK-----------------------------
---LGREI--L--------------------------------------------SGDSM
RP-YRGREAFPET--------LEDDLVTYIRRT--CHTANAIVGTARMGTG---------
--RD-------A--------------VVDP-ELRVH-GVERLRVID----ASV----MPK
I------IG----GQTG----VPTMMIAERGADLVKKTWKLV------------------
------------------------------------------------------------
------------------------------------------------------------
------------------------------------------------------------
------------------------------------------------------------
------------------------------------------------------------
------------------------------------------------------------
------------------------------------------------------------
------------------------------------------------------------
------------------------------------------------------------
------------------------------------------------------------
-------------------------------------
>Cs-GMC
------------------------------------------------------------
------------------------------------------------------------
------------------------------------------------------------
------------------------------------------------------------
------------------------------------------------------------
------------------------------------------------------------
------------------------------------------------------------
------------------------------------------------------------
------------------------------------------MMASQSVFLGTRPATRS-
----------PLPIGRAGHGSAGRRALRVRA--------------IIKSDN---------
---PAADKYDFILVGGGTA------------GCVLANR----------------------
---LTA-D---------------------GSK-----KVLLLEAGG-ANKA---------
-------------------------------------------REVRTPAGLPRLFK-SA
-LDWNLYSSLQQ-----AA-SDR-SIYL-----ARGK-----------------------
-LLGGSSATN---------------------------ATLYHRGTAADYD----------
---------AW------GVPGWTSQDALRWFIQAENN-CRGI------------------
EDGVHGT---GGLMRVENPRYNNP-LHE--------------------VFFQAA-K----
----Q-AGLPE-NDNFNNWGRSQA-------------GYGE-------------------
----FQVT-HSKGERADCFRMYL---EP--VMG----------RSN-LTVLTGAKTLKIE
TEKSGG----------------------ATVSRGVTFQVN--------------GQDGSK
HSAELA-----AGGEVVL------------CAGS-----IHSPQILQLSGIGPQAELRSK
DIPVVADLPGVGQNMQDHPACLSAF----------YL-KESAGPI----SVTDE-LLH--
--------TN-GRI------------RARAILKYLLFKK--GP----LATT---------
GCDHGA---------------FVKTAG--Q------------------------SEPDLQ
-------------------I---RFVPGLALDPDGIGSYT-AFGKM---KDQ----K-W-
-PSG---ITFQLL-GVRP-----------KSR-G-----------SVGLRSDDPWD-A--
----PKLDIGFLTDK---EGADLATLRSGIK-----------------------------
---LSREI--A--------------------------------------------AEPAF
GA-YVGNELHPGAAAS-----SDSAIDSFIRDT--VHSGNANVGTCSMGVN---------
-----G----NA--------------VVDP-SLRVF-GIRGLRVAD----ASV----IPV
I------PG----GQTG----AATVMVAERAAEILLGSNQKQPAAAVPAA----------
----QPALA---------------------------------------------------
------------------------------------------------------------
------------------------------------------------------------
------------------------------------------------------------
------------------------------------------------------------
------------------------------------------------------------
------------------------------------------------------------
------------------------------------------------------------
------------------------------------------------------------
------------------------------------------------------------
-------------------------------------
>Ccr
------------------------------------------------------------
-----------------------MASP---------------------------------
------------------------------------------------------------
------------------------------------------------------------
-------------------------CPAFAT-----------------------------
------------------------------------PIAV-------------------P
RSTL--------------------------------------------------------
------------------------------------------------------------
-----------------------------------------TSLISSSSSCTPRPVRTPA
PPTH-----RRLIHMAAPAGTVASTFRR------------------TVPSS---------
---EAATTYDYIIVGGGAA------------GCVLANR----------------------
---LTE-D---------------------PST-----RVLLLEAGK-PDDS---------
-------------------------------------------FYLHVPLGFPYLLG-SP
-NDWAFVTEPEP-----NL-ANR-RLYF-----PRGK-----------------------
-VLGGSHAIS---------------------------VMLYHRGHPADYT----------
---------AWAE----SAPGWAPQDVLPYFLKSESQ-QSAV-----------------P
NQDAHGY---EGPLAVSDLARLNP-MSK--------------------AFIKAA-H----
----NAAGLNH-NPDFNDWATGQD-------------GVGP-------------------
----FQVT-QRDGSRESPATSYL---RA--AKG----------RRN-LTVMTGAVVERIL
FENPAG--------------------SSTPVATAVSFIDS----------------KGTR
--VRMS-----ASREILL------------CGGV-----YATPQLLMLSGVGPAEHLRSH
GIEIVADVPAVGQNLQDHAAAMVSF----------ES-QNPEKDK----ANSSV-YYT--
--------ER-TGK------------NIGTLLNYVFRGK--GP----LTSP---------
MCEAGG---------------FAKTDP--SM-----------------------DACDLQ
-------------------L---RFIPFVS-EPDPYHSLA-DFATAGSYLQNRA--N-R-
-PTG---FTIQSV-AARP-----------KSR-G-----------HVQLRSTDVRD-S--
----MSIHGNWISND-----ADLKTLVHGVK-----------------------------
---LCRTI--G--------------------------------------------NDDSM
KE-FRGRELYPGGEKV-----SDADIEAYIRDT--CHTANAMVGTCRMGIG---------
-----E----QA--------------AVDP-ALQVK-GVARLRVVD----SSV----MPT
L------PG----GQSG----APTMMIAEKGADLIRAAARQADAATVGAAA---------
------------------------------------------------------------
------------------------------------------------------------
------------------------------------------------------------
------------------------------------------------------------
------------------------------------------------------------
------------------------------------------------------------
------------------------------------------------------------
------------------------------------------------------------
------------------------------------------------------------
------------------------------------------------------------
-------------------------------------
>XP_005842992.1
------------------------------------------------------------
------------------------------------------------------------
------------------------------------------------------------
------------------------------------------------------------
------------------------------------------------------------
-------------------------------MWLLLYT----------------------
------------------------------------------------------------
------------------------------------------------------------
------------------------------------------------------------
-----------------GAVRRGGALSARASAVE----DIRKVL-SDSSSP---------
---VAGQKYDYILVGGGTA------------ACVLANR----------------------
---LSA-D---------------------GSK-----RVLVLEAGP-DNTS---------
-------------------------------------------RDVKIPAAITRLFR-SP
-LDWNLFSELQE-----QL-AER-QIYM-----ARGR-----------------------
-LLGGSSATN---------------------------ATLYHRGAAGDYD----------
---------AW------GVEGWSSEDVLSCASLAR-R-SPAG------------------
PGAYHGS---GGPMRVENPRYTNKQLHT--------------------AFFKAA-E----
----E-VGLTP-NSDFNDWSHDHA-------------GYGT-------------------
----FQVM-QDKGTRADMYRQYL---KP--VLG----------RRN-LQVLTGAAVTKVN
IDQAAG----------------------KAQALGVEFSTD--------------GPTG--
-GAELA-----PGGEVIM------------CAGA-----VHTPFLLKHSGVGPSAELKEF
GIPVVSNLAGVGQNLQDQPACLTAA----------PV-KEKYDGI----AISGE-RNS--
--------LL-GQ-----------------ATIYLLGGR--GG----LTST---------
GCDRGA---------------FVRTAG--Q------------------------ALPDLQ
-------------------V---RFVPGMALDPDGVSTYV-RFA----------------
--NG---ITMQLI-ACRP-----------QST-G-----------SVGLKSADPFA-P--
----PKLSPGYLTDK---DGADLATLRKGIH-----------------------------
---WARDV--A--------------------------------------------RSSAL
SE-YLDGELFPGSGVV-----SDDQIDEYIRRS--IHSSNAITGTCKMGNA---------
--GD-S----SS--------------VVDN-QLRVH-GVEGLRVVD----ASV----VPK
I------PG----GQTG----APVVMIAERAAALLTGKATIGASAAAPA-----------
-----TVAA---------------------------------------------------
------------------------------------------------------------
------------------------------------------------------------
------------------------------------------------------------
------------------------------------------------------------
------------------------------------------------------------
------------------------------------------------------------
------------------------------------------------------------
------------------------------------------------------------
------------------------------------------------------------
-------------------------------------
>EWM27492.1
------------------------------------------------------------
-----------------------MSS----------------------------------
------------------------------------------------------------
------------------------------------------------------------
------------------------------------------------------------
------------------------------------------------------------
-------------------NGYLRAY----------------------------------
------------------------------------------------------------
-------------------------------------HLLIALLISANAFLITPPRLSKT
TI-------GLQSFVTANYGVRRAISLR---------GGLQSVS-MKAPAA---------
---VASSTYDYIIVGGGIG------------GCVLANR----------------------
---LTE-S---------------------GRF-----KVLLLEAGK-SAER---------
------------------------------------------NPYVNIPAGVVRLFK-SA
-LDWQFESAPER-----HL-DGK-EVYL-----VRGK-----------------------
-AMGGSSAVN---------------------------VMLVHRGSASDYA----------
---------KWEAE---GAQGWGPEEALRYFKKMEDN-LVGG------------------
EGRWHGQ---GGMYPVDDVKYQNP-LSK--------------------RFLQAC-E----
----E-YGWRA-NPDFNDWSHPQD-------------GYGS-------------------
----FKVA-QKHGKRVTAASGYL---NK--AVRR---------RPN-LDILSEALVTRVL
LEGEG-----------------------DVKAVGVEFTGK---------------DGKTH
QVRTTG-----KAGEVLL------------AGGA-----VNSPQLLMLSGIGPEADLQAV
GIATKVNRPGVGENLQDHPAVTIAH----------NI----TRPI----SLCDD-LFL--
--------FH-TPVP-----------KPHQVLRWTLTGS--GP----LTTP---------
GCDHGA---------------FLKTRE--DL-----------------------QEPNVQ
-------------------F---RFIAGRGSDPDGVRSYI-MGGSA----------R-P-
-LSG---LTLQVV-NIRP-----------KSK-G-----------KLTLASKDPLK-K--
----PRIEVRYLSAA-----EDLQALRTGMR-----------------------------
---IGRDL--I--------------------------------------------KQRAF
AD-ILDEEVFPGPAAQ-----TDEELDAYIRDS--LHTANALVGTCKMGSV---------
--ED-R----NA--------------VVDP-ECRVI-GVGGLRVVD----ASV----MPV
I------PG----GQTG----SGTTMLAEKAADLVRAHAGDLVEMGVQDEERKGGWFNGL
LGRKQKVATEKERGERGKSERFVSEVIRHMGRVFVQVSRARRAQTCMRVGKGLDRERQLE
CAMRKELTIALFYAML-FTMRHSGFLSTTGRASYKDLGYLTGSCRAHPCTSPSSLCLFPE
KPFMKLSPALAVVGFCFNSINVQGFLLSNLAGRSLKHPVPQKGLYSR---IEYDAREPRL
DEFGLPLDPADLMEKPRVPLKDRVYHIIDMTNDWVDAVSRGRREEETRRIIQRRRAAAKA
MAIKDKVLISLDYVFHPVKAWRTFVADPLEARHQRQLRQQAEKRARLERYLQRYNTVKNR
FHDTLDLLESTTRTSVKVAKSVSSAVVGAPGTVTRTVKEVKSQAQGTAEAVAKVSSSVSS
VVSKITSVIRKEDGALAGAKGKKDPRSEDEGKADPVKVREIWETKEQTAIRTIWEADEL-
-VTPVTPPATAMASTVSVSEPQDENEASISQGAAPSPSTSSPSSPEPVTRLSFRARVEAD
EKERFGSRRLKISGNVPPTASPTRGASSLPLDTLSSSATQTFERSKVGPPIRTSKARCI-
---GKCVHNGWKGICEEWFVHISFPTYAVSIVRPPMHVHNFKVICCVLAVRHARRKKEMS
TALSTHLIYLLLKTVKMLQDLPQLRRKGKTN------
>Aa-GMC
------------------------------------------------------------
-----------------------MG-----------------------------------
------------------------------------------------------------
------------------------------------------------------------
------------------------------------------------------------
------------------------------------------------------------
------------------------------------------------------------
------------------------------------------------------------
------------------------------------------------------------
---------------------------------------------RTLVLK---------
---VATTSYDYIIAGGGTA------------GCVLANR----------------------
---LSE-D---------------------PSK-----KVLVLEAGD-RGPN---------
------------------------------------------SPLVKIPVAILKLFK-SA
-YDWNFATRPSE-----AV-ADR-SLYV-----CRGK-----------------------
-GLGGSSLTN---------------------------VMLYNRGSANDYD----------
---------AWAAA--CGDDSWGAEEMLGYFKKAEDC-LVPA----------------HR
ANHYHGV---GGPYASSHVPYTNE-MST--------------------AFVEAA-V----
----E-DGGVR-NGDFNDWSTSQV-------------GFGR-------------------
----FAVS-QRKGARVDAATAYLP--RK--VRR----------RAN-LDVVRGAALSGVT
WNA--------------------------NKATGVEFAFG--------------------
GVSGIA-----CGGEVIL------------SGGA-----VHSPQMLMLSGVGAKAQLEEF
GIPVVADRPGVGKNLQDHPACLVSW----------RG-SAKAQGK----SHSTQ-LRI--
--------PG-TTKT-----------SPKALLQWLFLGR--GP----LASP---------
GCDHGG---------------FAKVGA--GD-----------------------GDCDVQ
-------------------F---RFLATKSITPDGMSTISDSYEAA---V------D-H-
-PDG---LTIQTI-VARP-----------KSRAG-----------EVKLASRDPAA-K--
----PVIENAYLSDE-----ADVMTMVKALQ-----------------------------
---KARSI--A--------------------------------------------SRAPL
SA-YAGHEEFPGEDVA-----DERQLAAYVRNT--AHTANAVVGTCKMGES---------
--SD-A----LA--------------VVDN-HLKVI-GVSNLRVVD----ASV----MPT
L------PG----GQTA----ASTVALAEKAADLIKGG----------------------
------------------------------------------------------------
------------------------------------------------------------
------------------------------------------------------------
------------------------------------------------------------
------------------------------------------------------------
------------------------------------------------------------
------------------------------------------------------------
------------------------------------------------------------
------------------------------------------------------------
------------------------------------------------------------
-------------------------------------
>Chry-GMC
------------------------------------------------------------
----------------------MMRR----------------------------------
------------------------------------------------------------
------------------------------------------------------------
------------------------------------------------------------
------------------------------------------------------------
------------------------------------------------------------
------------------------------------------------------------
---------------------------------------LVYICAVATV-----------
---------TAAISSRSVPTSARRLIALRGG--------------VAAAEQ---------
---LAEEPWDYIIVGGGAA------------GCVMAER----------------------
---LSA-----------------------AEA-----RVLVLEAGT-DASR---------
------------------------------------------DLRIRVPAGLIKVFK-SE
-RDWDFTTEAGQ-----GT-SGR-GIYL-----CRGK-----------------------
-ALGGSSCTN---------------------------VMLYNRGSPADYN----------
---------SWVAA---GAEGWGPDSVLHYYRKSENY-VGG-------------------
ASQYHGV---DGPLSVSDVPYENE-LST--------------------AFLRAA-G----
----E-LGYRR-VHDFNDWSAPQE-------------GFGR-------------------
----YKVT-QRNGERCSAANAYL---EG--TEG----------RSN-LCVRTGVHATRVT
LEGSGD----------------------DLCAAGVEYIG----------------ADGKP
SRAQLA-----QGGEVLL------------SAGA-----VQSPQLLMLSGIGPRAHLEEV
GIEVRKELDNVGVGLADHPAVVVSC----------GS----KKKV----SVTDE-IRL--
--------WG-GSKT-----------NPMALLRWLLWRR--GP----LTSV---------
ACEFGG---------------FFKTKP--DL-----------------------KQADVQ
-------------------V---RFVAARAMSPDGITTLQ-QLGAG---A------K-F-
-LSG---YTTQII-ACRP-----------QST-G-----------LVRLRSSDPLA-Q--
----PMLQDVHLSDD-----ADVATLREGIK-----------------------------
---LGRQL--L--------------------------------------------AAKSF
DQ-YRDEEVYPGVAVQ-----SDEDIDAYVRKT--THSANALVGSCRMGRV---------
--DD-Q----AA--------------VLDP-EMRVR-GVGSLRVVD----ASA----MPH
I------IG----GQTC----GPTIMMAEKAADLVLRQRAEINAYMQQAQAYLAAS----
AGAATPALSPAQAA----------------------------------------------
------------------------------------------------------------
------------------------------------------------------------
------------------------------------------------------------
------------------------------------------------------------
------------------------------------------------------------
------------------------------------------------------------
------------------------------------------------------------
------------------------------------------------------------
------------------------------------------------------------
-------------------------------------
>Gpe
------------------------------------------------------------
------------------------------------------------------------
------------------------------------------------------------
------------------------------------------------------------
------------------------------------------------------------
------------------------------------------------------------
------------------------------------------------------------
------------------------------------------------------------
------------------------------------------MMLGRKPVA---PAKGAS
AA--------------RTVRPVRLAGGRRQL-----------VV-SAAAAPV--------
---DPAEKYDYILVGGGTA------------GCVLANK----------------------
---LSA-D---------------------GNK-----KVLVLEAGP-SGDS---------
-------------------------------------------LEVAVPAGIARLFA-HP
VMDWGMSSLTQK-----QL-VAR-EIYL-----ARGR-----------------------
-LLGGSSGTN---------------------------ATLYHRGTSSDYD----------
---------SW------GLEGWTSKDVLDWFVKAECY-GDG-------------------
PKPYHGN---SGSMNVEQPRYQNP-LHE--------------------EFFRAA-A----
----A-AGIPA-NPDFNDWSRPQD-------------GYGE-------------------
----FQVA-QNKGQRADTYRTYL---KP--ALS----------RGN-LKVVTGARTTKVH
IEKGSS----------------------GPRARGVEFATQ---------------QFGDR
YSAQLA-----PGGEVLM------------CTGA-----VHTPHLLMLSGVGPAAALREH
GVDVVADLAGVGANLQDHPAAVVAV----------RA-KPEFEKL----SVTSE-IYD--
--------EK-CNI------------KLGAVAQYLFNRR--GP----LATT---------
GCDHGA---------------FVRTSG--SH-----------------------SQPDLQ
-------------------M---RFVPGCALDPDGVKSYI-VFGEL---KKQGR--A-W-
-PGG---ITLQLL-AIRA-----------KSK-G-----------SIGLKAADPFI-N--
----PAININYFSDP-----ADLATLKQGVR-----------------------------
---MARDI--A--------------------------------------------RQEPL
RK-YLQEETFPGERAS-----SDSDIEEYVRRT--VHSGNALVGTCAMGTS---------
--PA-K----GA--------------VVSSSDLKVF-GVEGLRVVD----ASV----LPQ
I------PG----GQTG----AATVMVAERAAALLKGQTTMAPSRQPVAA----------
------------------------------------------------------------
------------------------------------------------------------
------------------------------------------------------------
------------------------------------------------------------
------------------------------------------------------------
------------------------------------------------------------
------------------------------------------------------------
------------------------------------------------------------
------------------------------------------------------------
------------------------------------------------------------
-------------------------------------
>Frc-GMC
------------------------------------------------------------
------------------------------------------------------------
------------------------------------------------------------
------------------------------------------------------------
------------------------------------------------------------
------------------------------------------------------------
------------------------------------------------------------
------------------------------------------------------------
------------------------------------------------------------
------------------------------------------------------------
---------DYIITGGGLA------------GCLLADR----------------------
---LTA-D---------------------GTK-----KVLVLEAGT-PDYN---------
------------------------------------------AMIVRIPAGILRLFR-NT
KYDWQHETGGEK-----AC-NGR-NVFL-----QRGK-----------------------
-VLGGSSCTN---------------------------VCLHHRGSAQDYD----------
---------DW------GVPGWKAADVLPFFKASQKD-MTGR------------------
SPEFHGV---DGDWVMDDVRYQNP-LSK--------------------RFLEVG-E----
----K-AGLGT-NDDFNNWGRTQE-------------GVGR-------------------
----FQVS-EINGERCSGANAFL---TK--AMK----------NKN-CKVRTGTMVRRIN
FDQ-------------------------SKTATGVTYDLM-------G------DDTM--
---KLN-----PGGEVIV------------TSGA-----IASPQLLLCSGIGPSQHLKDH
GIPVVHDNPNVGENLQDHPAAVVSF----------KT-P--VKGV----SVTSK-LRL--
--------FG-M--T-----------NPFPILQWLIFKT--GL----LTST---------
GCDHGA---------------FVRTSA--SI----------------------KGQPDLQ
-------------------I---RFLAARALGPDGMTTFT-QFRNS---K------S-H-
-DDG---YSLQSV-ACRA-----------KSQ-G-----------SVRLVSSNTHI-K--
----PAIDGGYLSDP-----NDLKTLREGIK-----------------------------
---LGRQL--G--------------------------------------------NSPDW
GE-YLGEEVYPGLDVQ-----TDAEIDEYIKNT--IHTANALTGTCKMGTG---------
--KD-------A--------------VVTP-ELKVI-GVNGVRVAD----SST----IPI
L------PG----GQTA----TPTVMIAERAAAFLINPHQSVTTTT--------------
------------------------------------------------------------
------------------------------------------------------------
--------------------EVI--------------------MED--------------
------------------------------------------------------------
------------------------------------------------------------
-------N-V--------------------------------------------------
--------------------DTPEPA----------------------------------
------------------------------------------------------------
------------------------------------------------------------
------------------------------------------------------------
--MAA-------------------------------A
>OSX75970.1
------------------------------------------------------------
------------------------------------------------------------
------------------------------------------------------------
------------------------------------------------------------
------------------------------------------------------------
------------------------------------------------------------
------------------------------------------------------------
------------------------------------------------------------
------------------------------------------------------------
--------------MATAAASSPSVAAR--------------------SPP---------
---ASSKTFDYIIVGGGAA------------GCVLAAR----------------------
---LSE-D---------------------PTK-----RVVLLEAGG-RDTK---------
-------------------------------------------RMIHIPLGFPYLLG-SD
-VDWAYSTEPEA-----AL-GGR-RLYL-----PRGK-----------------------
-VLGGSHAIS---------------------------VMLYQRGDTADYA----------
---------RWDAA-AGGNAGWSADDMLPYFKRSEAN-TRATAGDSGVDAAAASGMSAAD
AARVHGA---DGPLAVSDLRCVNE-MST--------------------AFLAAA-Q----
----E-AGLDR-NPDFNDWERSQE-------------GVGF-------------------
----FQVT-QRNGSRASPATTYL---AA--ARG----------RKN-LTVLTGVTVERVT
MAGTTGGAGA----------------GSPPRATGVEYIDA----------------AGQR
--HAVT-----AAVETLL------------AGGV-----FASPQLLMLSGVGPAAHLRAH
GIPVVADVPGVGANLQDHPATMVSY----------VS-KEPQADK----RNSSV-FYT--
--------EK-TGK------------SLATLLKYAFGGK--GP----LTTP---------
MCEAGG---------------FVTTPS--AA-------------------ADGRTSADLQ
-------------------L---RFIPFAS-EPDPYASLG-EFAAGGSYLTNSS--S-R-
-PAG---FTLQSV-LARP-----------VSR-G-----------SVALKTASAFD-R--
----PSIEAGWMKAE-----EDVATLVDGMK-----------------------------
---LCRKI--G--------------------------------------------AQAPF
AA-YRGAERFPGGDVV-----SDADLAAYVRST--CHTANALVGTCALGD----------
--------------------------VVDA-QLRVK-GVAGLRVVD----SSV----MPT
I------VG----GQTG----AATMALAEKGADMIRGDAAAEAAAAAAAASATL------
------------------------------------------------------------
------------------------------------------------------------
------------------------------------------------------------
------------------------------------------------------------
------------------------------------------------------------
------------------------------------------------------------
------------------------------------------------------------
------------------------------------------------------------
------------------------------------------------------------
------------------------------------------------------------
-------------------------------------
>A0A248QE08
------------------------------------------------------------
-----------------------MASI---------------------------------
------------------------------------------------------------
------------------------------------------------TSRAS-------
------------------------------------------------------------
------------------------------------------------------------
------------------------------------------------------------
------------------------------------------------------------
------------------ARASCSQANTRAGRVA---LSGGALLRPARPARSFVPARKQQ
Q----------------GAVRRGGALSARASAVE----DIRKVL-SDSSSP---------
---VAGQKYDYILVGGGTA------------ACVLANR----------------------
---LSA-D---------------------GSK-----RVLVLEAGP-DNTS---------
-------------------------------------------RDVKIPAAITRLFR-SP
-LDWNLFSELQE-----QL-AER-QIYM-----ARGR-----------------------
-LLGGSSATN---------------------------ATLYHRGAAGDYD----------
---------AW------GVEGWSSEDVLSWFVQAETN-ADFG------------------
PGAYHGS---GGPMRVENPRYTNKQLHT--------------------AFFKAA-E----
----E-VGLTP-NSDFNDWSHDHA-------------GYGT-------------------
----FQVM-QDKGTRADMYRQYL---KP--VLG----------RRN-LQVLTGAAVTKVN
IDQAAG----------------------KAQALGVEFSTD--------------GPTGER
LSAELA-----PGGEVIM------------CAGA-----VHTPFLLKHSGVGPSAELKEF
GIPVVSNLAGVGQNLQDQPACLTAA----------PV-KEKYDGI----AISDH-IYN--
--------EK-GQI------------RKRAIASYLLGGR--GG----LTST---------
GCDRGA---------------FVRTAG--Q------------------------ALPDLQ
-------------------V---RFVPGMALDPDGVSTYV-RFAKF---QSQGL--K-W-
-PSG---ITMQLI-ACRP-----------QST-G-----------SVGLKSADPFA-P--
----PKLSPGYLTDK---DGADLATLRKGIH-----------------------------
---WARDV--A--------------------------------------------RSSAL
SE-YLDGELFPGSGVV-----SDDQIDEYIRRS--IHSSNAITGTCKMGNA---------
--GD-S----SS--------------VVDN-QLRVH-GVEGLRVVD----ASV----VPK
I------PG----GQTG----APVVMIAERAAALLTGKATIGASAAAPA-----------
-----TVAA---------------------------------------------------
------------------------------------------------------------
------------------------------------------------------------
------------------------------------------------------------
------------------------------------------------------------
------------------------------------------------------------
------------------------------------------------------------
------------------------------------------------------------
------------------------------------------------------------
------------------------------------------------------------
-------------------------------------
>Chles-GMC
------------------------------------------------------------
------------------------------------------------------------
------------------------------------------------------------
------------------------------------------------------------
------------------------------------------------------------
------------------------------------------------------------
------------------------------------------------------------
------------------------------------------------------------
-------------------------------------------MLGTLPKS---------
------------TNQRLSANHGRPGSGQRGQ-----------VA-CRAANP---------
---VNGEKFDYIVVGGGTA------------GCVVANR----------------------
---LSA-D---------------------SSK-----KVLLLESGP-SGDS---------
-------------------------------------------MEISVPAGISRLFK-HP
ILDWGLMSKTQQ-----QL-FAR-EIYL-----ARGR-----------------------
-ALGGSSCTN---------------------------ATLYNRGSAEDYD----------
---------GW------GLEGWKSSDVLKWFMDAEDY-PPG-------------------
PKPYHGV---GGTMKVEQPRYENI-LHD--------------------EFFRAA-A----
----S-IGLKH-NDDFNAWDRPQE-------------GFGE-------------------
----FQVT-QMQGERADMYRTYL---KP--AMQ----------RGN-LKVVTGARTTKIS
FERLLG--------------------RSEQRAEGVEFTTG--------------GQFGER
FVAELS-----SQGEVVM------------AAGA-----VHTPHLLQLSGVGGAAMLLSH
GIPVVSDLPGVGANLQDHPACCYAA----------RF-KPEYDDI----TVTAD-IYD--
--------KS-NNI------------KPSAVLKYLFGRK--GP----LTTT---------
GCDHGA---------------FLSTTG--K------------------------GQPDLQ
-------------------I---RFVAGFALDPDGVSSYI-KFGEM---KKQGL--S-W-
-PGG---ITLQLL-AIRS-----------KSK-G-----------SVGLKSADPFV-N--
----PDININYFSDP---LSADVATLREGYK-----------------------------
---ISRKI--A--------------------------------------------GAAAF
EK-YGPTEAYPGTSRT-----EDADIDEFIRKT--VHSGNALVGTCRMGHS---------
--PEDE----GA--------------VVSSQDLKVF-GLENVRVVD----SSV----IPV
I------PG----GQTG----AATVMVAERAAVLLKSSASRSPLVMRSA-----------
------------------------------------------------------------
------------------------------------------------------------
------------------------------------------------------------
------------------------------------------------------------
------------------------------------------------------------
------------------------------------------------------------
------------------------------------------------------------
------------------------------------------------------------
------------------------------------------------------------
------------------------------------------------------------
-------------------------------------
>Cso-GMC
------------------------------------------------------------
-----------------------MATI---------------------------------
------------------------------------------------------------
------------------------------------------------AASRS-------
------------------------------------------------------------
------------------------------------------------------------
------------------------------------------------------------
------------------------------------------------------------
------------------VQGVASGPAARSGR-----SGSLGLLAGSKRATAPVAAIQAQ
RTAS-----------RGAATACRGSTAVRASAVE----DIQKVL-TETSSP---------
---VAGKQYDYILVGGGTA------------ACVLANR----------------------
---LSE-G---------------------GAK-----RVLVLEAGP-DNTS---------
-------------------------------------------RDVKIPAAITRLFR-SP
-LDWNLFSSLQP-----QL-AER-QIYL-----ARGR-----------------------
-LLGGSSSTN---------------------------ATLYHRGAAADYD----------
---------SW------GVPGWGAADLLPWFIKAETN-ADFE------------------
AGKFHGK---QGNMRVENPRYTNEKLHS--------------------AFFASA-Q----
----Q-MGLPR-NSDFNNWDQDHG-------------GYGT-------------------
----FQVM-QDKGTRADMYRQYL---KP--ALG----------RPN-LQVLTGASVTRVH
IDKASG----------------------KATALGVEFSLD--------------GPAGQR
LTAELA-----PGGEVVM------------CAGA-----VHTPHILQLSGVGNGRELREH
GMAVATDLPAVGANLQDQPACLTAA----------PL-KDKYDGI----AISDD-IYT--
--------AK-GQI------------RKRAVLSYLLRGR--GP----LTST---------
GCDRGA---------------FVRTSG--Q------------------------ALPDLQ
ASTGGFACHFNW-------V---RFVPGMALDSDGVSTYV-RFAKF---QTQGL--K-W-
-PSG---ITVQLI-ACRP-----------QSV-G-----------SVGLKSADPFD-A--
----PKLSPGYLTDA---AGADLATLRSGVH-----------------------------
---WAREL--A--------------------------------------------RQGPL
AE-YLSGELFPGSAVD-----SDAAIDEYIRGS--IHSSNAIVGTCKMGGS---------
--PA------DS--------------VVDT-QLRVH-GVEGLRVVD----ASV----VPR
I------PG----GQVA----APVVAIAERAAALLRGEASIAGAAAAAT-----------
------VAA---------------------------------------------------
------------------------------------------------------------
------------------------------------------------------------
------------------------------------------------------------
------------------------------------------------------------
------------------------------------------------------------
------------------------------------------------------------
------------------------------------------------------------
------------------------------------------------------------
------------------------------------------------------------
-------------------------------------
>GBF88787.1
------------------------------------------------------------
------------------------------------------------------------
------------------------------------------------------------
------------------------------------------------------------
------------------------------------------------------------
------------------------------------------------------------
------------------------------------------------------------
------------------------------------------------------------
-------------------------------------------MLAQTSRGAVRPAAAAQ
K---------------GRTVSLRAAARRRAA-----------VV-VRAAAS---------
---PVDGKYDYVIVGGGTA------------GCVLANR----------------------
---LTA-D---------------------GGK-----RVLVLESGG-NGGA---------
-------------------------------------------LETRVPAALARLFR-HP
TLDWNLFSALQA-----RL-GER-EVYL-----ARGK-----------------------
-LLGGSSATN---------------------------ATLYLRGTPADYD----------
---------AW------ALPGWGAGDVLPWFVEAETN-SKG-------------------
ASPYHGS---GGLMRVESPRYVNP-LHA--------------------EFFAAA-K----
----A-AGLEA-NGDFNDWGRPQE-------------GFGE-------------------
----YQVT-QNNGRRADAFQTHL---KP--AMG----------RPN-LTVVTGTHVTRLG
LESSGA---------------------GKPRAVGVEFSTG-------R------AAQADR
FTAELA-----PGGEVLM------------CSGT-----VANPQLLMLSGIGPEGALRDL
GLPVVAAAEGVGANLQDHPATLFAA----------LS-KPEYQDM----YISSE-IYG--
--------IG-GTI------------RLGAIAQLLLQGR--GP----LATT---------
GCDRGA---------------FVNTRG--GS-----------------------GDPDLQ
-------------------I---RFVPGYALDPDAIQSYV-KYGQL---RKEGK--A-W-
-PGG---ITMQLL-TARP-----------KSR-G-----------RVGLYSADPFA-P--
----PKVDLGYFSDA---GGADLATLLAGIK-----------------------------
---LARSI--A--------------------------------------------EQAPL
AK-YLKQEGWPGADVQ-----SEADLEAYVRRS--ACSGNALVGSCRMGAA---------
--PT-D----GS--------------VVSAQDFSVW-GVDALRVVD----ASV----IPT
I------PG----GQTG----AATVMVAERAAALLTGAGAPRRGGAAAGA----------
---KAAALA---------------------------------------------------
------------------------------------------------------------
------------------------------------------------------------
------------------------------------------------------------
------------------------------------------------------------
------------------------------------------------------------
------------------------------------------------------------
------------------------------------------------------------
------------------------------------------------------------
------------------------------------------------------------
-------------------------------------
>QDM14404.1
MAHSSATRCGGP---------------------------AAF----------------AP
PL-----------------GVRVMGAT---------------------------------
------------------------------------------------------------
------------------------------------------------------------
-------------------------RPAAAA-----------------------------
------------------------------------------------------------
------------------AVG-ASPTTASSF-----------------------------
------------------------------------------------------------
-------------------------------------TPG-GGAGVASRSRCTRPATA-A
PS-------GAAVRMTTAAPSSPSVASR--------------------STP---------
---ASSSTVDYIVVGGGAA------------GCVLAAR----------------------
---LSE-D---------------------PTK-----RVLLLEAGG-RDTK---------
-------------------------------------------RMLHIPLGFPYLLG-SD
-VDWAYTTEPEE-----AL-GGR-RLYL-----PRGK-----------------------
-VLGGSHAIS---------------------------VMLYQRGDTADYA----------
---------RWDAA-AGGNAGWSAADMLPYFKRSEAN-TRVLGGGDG-------ELSPAD
AARIHGA---DGPLAVSDLRCVNE-MSS--------------------AFLSAA-S----
----A-AGLAR-NADFNDWERSQE-------------GVGL-------------------
----FQVT-QRNGARATPATTYL---AA--ARG----------RKN-LTVLTGVTVERVT
TTAASG--------------------SSPPRATGVEYIDA----------------DGQR
--HVVA-----AAVETVL------------AGGV-----FASPQLLMLSGIGPAEDLQSH
GIPVVVDAPGVGANLQDHPATMVSY----------LS-HEPMQDK----RKSSV-YYT--
--------EK-TGK------------SLFTLLRYAFGGK--GP----LTSP---------
MCEAGG---------------FVTTPS--AA-------------------ADGRSSADLQ
-------------------L---RFIPFAS-EPDPYASLG-EFAAGGSYLTNSS--S-R-
-PAG---FTLQSV-VARP-----------VSR-G-----------RVSIKSASVTD-R--
----PVIEAGWMKSE-----EDLATLVDGMK-----------------------------
---LCRKI--A--------------------------------------------AQEPF
SP-YRGTERFPGGDVV-----SDADLADYARST--CHTANALVGTCALGD----------
--------------------------VVDA-QLRVK-GVAGLRVVD----SSV----MPT
I------VG----GQTG----AATMALAEKGADMIRAAAVAEAGAAAAAASATL------
------------------------------------------------------------
------------------------------------------------------------
------------------------------------------------------------
------------------------------------------------------------
------------------------------------------------------------
------------------------------------------------------------
------------------------------------------------------------
------------------------------------------------------------
------------------------------------------------------------
------------------------------------------------------------
-------------------------------------
>KAA8494096.1
MDQST-------------------------------------------------------
--------------------TKAMDVV---------------------------------
------------------------------------------------------------
------------------------------------------------------------
-------------------------PPAMI------------------------------
-------------------------------------MFV-------------------P
IANG--------------SGG-AGALRHSRG-----------------------------
------------------------------------------------------------
-------------------------------------KVGHSACLAATSGRRHRP-----
---------------SSGSHSARRLDVRMAAAL------------EQGTHR---------
---SLTGEVDYVIVGGGAA------------GCVLANR----------------------
---LSA-D---------------------KNV-----SVLLLEAGG-KGDS---------
-------------------------------------------FKISVPLGFPYLCG-SD
-IDWKYLSEPEE-----EL-HER-RVYF-----PRGK-----------------------
-MLGGSHSMS---------------------------VMLYHRGEAADYE----------
---------QWEAM---GAEGWGPDGVLPFFKKSEHQ-HAKD-----------------M
DSAFHSK---SGPLSVSDLRRVNP-LTK--------------------VFLEAC-E----
----G-AGMPR-NEDFNNWNSRQD-------------GMGT-------------------
----FQVT-QREGMRESPATAYL---RP--VVG----------RRN-LRVETHASVEKVL
IDE------------------------GSKTAVGVSYVNK----------------DGRK
--VKIQ-----ARKEVIL------------AAGS-----LATPQLLMLSGIGDRHMLDEF
GIPVIQHLPGVGQNLQDQPAVMLSY----------QS-PNPYVDK----NKTQT-YYT--
--------ER-TGK------------DIRSILSYLFLGN--GP----LTSP---------
MCEAGG---------------FVRSDP--SQ-----------------------RSCDLQ
-------------------L---RFIPFVS-EPDPYHSLG-DFATGGEYLTNKS--N-R-
-PAG---FTLQSV-VTRP-----------KSR-G-----------YVALRSADFRD-R--
----PMVVPRWLEDK-----ADLKTMVEGIK-----------------------------
---LCRKI--A--------------------------------------------SQSQF
AQ-FRGDELYPGPQLS-----SDADLESYIRES--CHTANAVVGSCRMGAL---------
--DD-D----SA--------------VVDP-SLRVK-HIKNLRVID----SSV----MPT
L------PG----GQAG----APTMMIAEKGAELVFILALSESAHLPLDAVGKMLVI---
------------------------------------------------------------
------------------------------------------------------------
------------------------------------------------------------
------------------------------------------------------------
------------------------------------------------------------
------------------------------------------------------------
------------------------------------------------------------
------------------------------------------------------------
----------------------CS------------------------------------
------------------------------------------------------------
-------------------------------------
>HHG08842.1
------------------------------------------------------------
-----------------------MRS----------------------------------
------------------------------------------------------------
------------------------------------------------------------
------------------------------------------------------------
------------------------------------------------------------
------------------------------------------------------------
------------------------------------------------------------
---------------------------------------RYCFLLSSTPCK-----YAGQ
RSPFP----ASALAGVCAVGRLRNVTHNLRPGLRT---LRASAE-TEHSQG---------
---TRQAQYDFIIVGAGAA------------GCVLANR----------------------
---LSTAQFSN------------------GDR--RYPRVLLLEAGD-ALAEA--------
------------------------------------------PYFEHIPLGFPQLIG-SR
-LDYGFFSRENPT----HL-GGRGAVYL-----PRGR-----------------------
-GEGGSHAIS---------------------------VMLVHRGSRHDYE----------
---------TWVKD--YEALGWGPDDVLPYFKRLESN-ERTAQRGAD----------GEA
ATALHGS---DGPLRVSDQRSPNP-LSL--------------------AFIEAC-L----
----E-RGIRR-NKDFNDWDHGQE-------------GAGL-------------------
----FQVT-QRDGRRESPATAYL---QP--VRS----------RRN-LHIETNALAEHLV
WSK------------------------DGRRVEGIRFIDR----------------HGRR
RAAL-------AHCEVIL------------AAGA-----INTPQLLMLSGLGPGAHLQDF
GIPVVRDLPGVGQNLQDHAAVMLSY----------YA-PDPYGKD-R--DKKRI-FYT--
--------ER-LGK------------DPLVLAEYFLLGR--GP----LTSP---------
VCEAGA---------------FVHTQA--VI---------------------GEPSCDLQ
-------------------L---RFVPFFS-DADPYKSLG-EYRSGGHVLTNTS--I-R-
-PAG---FGLQAV-AIRP-----------RSR-G-----------RIELATIDPRA-R--
----PIIHTGWLEDE-----RDLQTLLSGLK-----------------------------
---LGREI--L--------------------------------------------SGDSM
RP-YRGREAFPET--------LEDDLVTYIRRT--CHTANAIVGTARMGTG---------
--RD-------A--------------VVDP-ELRVH-GVERLRVID----ASV----MPK
I------IG----GQTG----VPTMMIAERGADLVKKTWKLV------------------
------------------------------------------------------------
------------------------------------------------------------
------------------------------------------------------------
------------------------------------------------------------
------------------------------------------------------------
------------------------------------------------------------
------------------------------------------------------------
------------------------------------------------------------
------------------------------------------------------------
------------------------------------------------------------
-------------------------------------
>AXL65962.1
------------------------------------------------------------
------------------------------------------------------------
------------------------------------------------------------
------------------------------------------------------------
------------------------------------------------------------
------------------------------------------------------------
------------------------------------------------------------
------------------------------------------------------------
-----------------------------------------HMMLGPKTVT---RGATKG
AA--------------PRSMAARRVGGARRL----------GSV-RAAAGP---------
---AGSEKFDYVLVGGGTA------------SCVLANK----------------------
---LSA-D---------------------GNK-----KVLVLEAGP-TGDA---------
-------------------------------------------MEVAVPAGITRLFA-HP
VMDWGMSSLTQK-----QL-VAR-EIYL-----ARGR-----------------------
-MLGGSSGSN---------------------------ATLYHRGSAADYD----------
---------AW------GLEGWSSKDVLDWFVKAECY-ADG-------------------
PKPYHGT---GGSMNTEQPRYENV-LHD--------------------EFFKAA-A----
----A-TGLPA-NPDFNDWSHPQD-------------GFGE-------------------
----FQVS-QKKGQRADTYRTYL---KP--AMA----------RGN-LKVVIGARATKVN
IEKGSS----------------------GARTTGVEYAMQ---------------QFGDR
FTAELA-----PGGEVLM------------CSGA-----VHTPHLLMLSGVGPAATLKEH
GIDVVSDLSGVGQNLQDHPAAVLAA----------RA-KPEFEKL----SVTSE-VYD--
--------DK-CNI------------KLGAVAQYLFQRR--GP----LATT---------
GCDHGA---------------FVRTSS--SL-----------------------SQPDLQ
-------------------M---RFVPGCALDPDGVKSYI-VFGEL---KKQGR--A-W-
-PGG---ITLQLL-AIRA-----------KSK-G-----------SIGLKAADPFI-N--
----PAININYFSDP-----ADLATLVNAVK-----------------------------
---MARKI--A--------------------------------------------AQEPL
KK-YLQEETFPGERAS-----SDKDLEEYIRRT--VHSGNALVGTAAMGAS---------
--PA-A----GA--------------VVSSADLKVF-GVEGLRVVD----ASV----LPR
I------PG----GQTG----AATVMVAERAAALLRGQATIAPSRQPVAV----------
------------------------------------------------------------
------------------------------------------------------------
------------------------------------------------------------
------------------------------------------------------------
------------------------------------------------------------
------------------------------------------------------------
------------------------------------------------------------
------------------------------------------------------------
------------------------------------------------------------
------------------------------------------------------------
-------------------------------------
>KAF5834678.1
------------------------------------------------------------
------------------------------------------------------------
------------------------------------------------------------
------------------------------------------------------------
------------------------------------------------------------
------------------------------------------------------------
------------------------------------------------------------
------------------------------------------------------------
------------------------------------------MMLQGKVSL---------
-----------------RVGQHGLRLGSRSG-----------IS-KVAVRPLPVL-----
--RATGEKYDAIIVGGGTA------------GCVLADR----------------------
---LSA-D---------------------ENK-----RVLVLEAGP-KGDT---------
-------------------------------------------WETWVPAGITRLFN-HP
VLDWGLKTVSQK-----QL-TER-EVYL-----ARGK-----------------------
-ALGGSSCTN---------------------------ATLYHRGTAADYD----------
---------SW------GLEGWKSDELLKWFNQAENF-EDGP------------------
VSPYHGV---GGAMHVERPRYDTP-MHE--------------------NFFKSC-A----
----N-AGLPA-NPDFNDWSRPQA-------------GYGE-------------------
----FLVS-QKKGQRADANRMYL---KP--AMG----------RPN-LEVVTEARTTKIM
FDRAAG---------------------VLPKAVGVQFSQG-----------------GAN
ESAQLA-----EGGEVLM------------CSGA-----VHSPHLLQLSGIGPAAQLQQL
GIEVVSDLPGVGQNLQDHPATLVGC----------LT-AEEFDDL----AVTSQ-IYN--
--------KK-SEV------------KKRRVLQYLLTKT--GP----LATT---------
GCDHGA---------------FLSTTG--S------------------------GDPDLQ
-------------------M---RFVPAFSLDPDGVQAYI-KFAEL---KRLGQ--S-W-
-PCG---VTIQLL-AVRP-----------KSR-G-----------SVGLRSTDPFA-N--
----PAIDLNYYSDP---EGADIRTLREGIR-----------------------------
---LARNI--F--------------------------------------------RQQPL
AS-YIKEEKWPGPQVQ-----EDADLDAFIRSS--TCSGNALVGTCRMGLP---------
--ED-P----NA--------------VVSATDLSVR-GVSGVRVVD----SSV----IPR
I------PG----GQTG----AATVMVAERAAAMLTSKQPMVRGSPGSIGD---------
---KQLVASA--------------------------------------------------
------------------------------------------------------------
------------------------------------------------------------
------------------------------------------------------------
------------------------------------------------------------
------------------------------------------------------------
------------------------------------------------------------
------------------------------------------------------------
------------------------------------------------------------
------------------------------------------------------------
-------------------------------------
>Nga-GMC
------------------------------------------------------------
-----------------------MSS----------------------------------
------------------------------------------------------------
------------------------------------------------------------
------------------------------------------------------------
------------------------------------------------------------
-------------------NGYLRAY----------------------------------
------------------------------------------------------------
-------------------------------------HLLIALLISANAFLITPPRLSKT
TI-------GLQSFVTANYGVRRAISLR---------GGLQSVS-MKAPAA---------
---VASSTYDYIIVGGGIG------------GCVLANR----------------------
---LTE-S---------------------GRF-----KVLLLEAGK-SAER---------
------------------------------------------NPYVNIPAGVVRLFK-SA
-LDWQFESAPER-----HL-DGK-EVYL-----VRGK-----------------------
-AMGGSSAVN---------------------------VMLVHRGSASDYA----------
---------KWEAE---GAQGWGPEEALRYFKKMEDN-LVGG------------------
EGRWHGQ---GGMYPVDDVKYQNP-LSK--------------------RFLQAC-E----
----E-YGWRA-NPDFNDWSHPQD-------------GYGS-------------------
----FKVA-QKHGKRVTAASGYL---NK--AVRR---------RPN-LDILSEALVTRVL
LEGEG-----------------------DVKAVGVEFTGK---------------DGKTH
QVRTTG-----KAGEVLL------------AGGA-----VNSPQLLMLSGIGPEADLQAV
GIATKVNRPGVGENLQDHPAVTIAH----------NI----TRPI----SLCDD-LFL--
--------FH-TPVP-----------KPHQVLRWTLTGS--GP----LTTP---------
GCDHGA---------------FLKTRE--DL-----------------------QEPNVQ
-------------------F---RFIAGRGSDPDGVRSYI-MGGSA----------R-P-
-LSG---LTLQVV-NIRP-----------KSK-G-----------KLTLASKDPLK-K--
----PRIEVRYLSAA-----EDLQALRTGMR-----------------------------
---IGRDL--I--------------------------------------------KQRAF
AD-ILDEEVFPGPAAQ-----TDEELDAYIRDS--LHTANALVGTCKMGSV---------
--ED-R----NA--------------VVDP-ECRVI-GVGGLRVVD----ASV----MPV
I------PG----GQTG----SGTTMLAEKAADLVRAHAGDLVEMGVQDEERKGGWFNGL
LGRKQKAAT---------------------------------------------------
------------------------------------------------------------
------------------------------------------------------------
------------------------------------------------------------
------------------------------------------------------------
------------------------------------------------------------
------------------------------------------------------------
------------------------------------------------------------
------------------------------------------------------------
------------------------------------------------------------
-------------------------------------
>Gsu-GMC
------------------------------------------------------------
-----------------------MN-----------------------------------
------------------------------------------------------------
------------------------------------------------------------
------------------------------------------------------------
------------------------------------------------------------
------------------------------------------------------------
------------------------------------------------------------
------------------------------------------LMKTSFISCCCLPTCKSS
KVDRKGWK-RAFLKVLKRKKSLRAYFWKDKQYIS-----------TVPVAAS--LENDVH
NGFDRSREFDYVIVGGGAA------------GCVLASR----------------------
---LSE-D---------------------KRS-----TVLLLEAGK-EDEN---------
-------------------------------------------FYIHVPMGFPYLVG-SD
-LDWKYQSTSEE-----RL-LDR-KIMW-----PRGK-----------------------
-VLGGSHAIS---------------------------VMLYLRGSANDYR----------
---------EWERC---GALGWGPEDVLPYYLKAENN-LRG-------------------
VGPYHGK---GGPLTVSDLPSPNE-MSH--------------------AFVIAG-Q----
----T-LDIPY-NKDFNDWSHSQE-------------GIGL-------------------
----FQVT-QANGKRVSPATAYL---HP--VRS----------RRN-LFIETQRHVEKIL
FTKEIG---------------------SCPRAIGVSYINS----------------NGKR
ERAMIR-------KEVVV------------SAGA-----YGSPQLLMLSGIGPSNVLDSI
GIPTVMPLEGVGKNLQDHFAVMFSC----------KS-PDPSKDR----KRRNL-YYT--
--------DD-TGK------------DWKTILTWFLSGK--GP----LTST---------
MCEAGA---------------FLKTNP--IF-----------------------NDPDLQ
-------------------L---RFIPFFS-EADPYFSLS-DYSSKGMFFKNRS--H-R-
-PSG---FTIQSV-AIRP-----------KSR-G-----------RLTIQSKDPRM-L--
----PIIESGWFSSQ-----EDLETLLRGIS-----------------------------
---LSQKL--V--------------------------------------------HASPL
AS-YFGEQCFPSTGLS-----KKEDIIRYISST--CHTANAVVGTCRMG-----------
--TD-K----QA--------------VVNP-NLQVM-GVERLRVVD----ASI----MPC
I------PG----GQTG----APTIMIAEKAADMIRGKLSLKANF---------------
---EQNVFK---------------------------------------------------
------------------------------------------------------------
------------------------------------------------------------
------------------------------------------------------------
------------------------------------------------------------
------------------------------------------------------------
------------------------------------------------------------
------------------------------------------------------------
------------------------------------------------------------
------------------------------------------------------------
-------------------------------------
>Dus-GMC
------------------------------------------------------------
------------------------------------------------------------
------------------------------------------------------------
------------------------------------------------------------
------------------------------------------------------------
------------------------------------------------------------
------------------------------------------------------------
------------------------------------------------------------
------------------------------------------MMLQGKVSL---------
-----------------RVGQHGLRLGSRSG-----------IS-KVAVRPLPVL-----
--RATGEKYDAIIVGGGTA------------GCVLADR----------------------
---LSA-D---------------------ENK-----RVLVLEAGP-KGDT---------
-------------------------------------------WETWVPAGITRLFN-HP
VLDWGLKTVSQK-----QL-TER-EVYL-----ARGK-----------------------
-ALGGSSCTN---------------------------ATLYHRGTAADYD----------
---------SW------GLEGWKSDELLKWFNQAENF-EDGP------------------
VSPYHGV---GGAMHVERPRYDTP-MHE--------------------NFFKSC-A----
----N-AGLPA-NPDFNDWSRPQA-------------GYGE-------------------
----FLVS-QKKGQRADANRMYL---KP--AMG----------RPN-LEVVTEARTTKIM
FDRAAG---------------------VLPKAVGVQFSQG-----------------GAN
ESAQLA-----EGGEVLM------------CSGA-----VHSPHLLQLSGIGPAAQLQQL
GIEVVSDLPGVGQNLQDHPATLVGC----------LT-AEEFDDL----AVTSQ-IYN--
--------KK-SEV------------KKRRVLQYLLTKT--GP----LATT---------
GCDHGA---------------FLSTTG--S------------------------GDPDLQ
-------------------M---RFVPAFSLDPDGVQAYI-KFAEL---KRLGQ--S-W-
-PCG---VTIQLL-AVRP-----------KSR-G-----------SVGLRSTDPFA-N--
----PAIDLNYYSDP---EGADIRTLREGIR-----------------------------
---LARNI--F--------------------------------------------RQQPL
AS-YIKEEKWPGPQVQ-----EDADLDAFIRSS--TCSGNALVGTCRMGLP---------
--ED-P----NA--------------VVSATDLSVR-GVSGVRVVD----SSV----IPR
I------PG----GQTG----AATVMVAERAAAMLTSKQPMVRGSPGSIGD---------
---KQLVASAX-------------------------------------------------
------------------------------------------------------------
------------------------------------------------------------
------------------------------------------------------------
------------------------------------------------------------
------------------------------------------------------------
------------------------------------------------------------
------------------------------------------------------------
------------------------------------------------------------
------------------------------------------------------------
-------------------------------------
>14447664
------------------------------------------------------------
------------------------------------------------------------
------------------------------------------------------------
------------------------------------------------------------
------------------------------------------------------------
------------------------------------------------------------
------------------------------------------------------------
------------------------------------------------------------
------------------------------------------------------------
-------------------------------------------------NP---------
---VKGKTFDYIIVGGGAA------------GCVLASK----------------------
---LSA-D---------------------GSK-----RVLLLEAGP-DRTD---------
------------------------------------------AFEVKVPAGITRIFR-SP
-LDWGLYTDRQK-----PL-GQR-EVNL-----ARGR-----------------------
-LLGGSSSTN---------------------------AALYHRGTAADYD----------
---------AW------GVEGWAARDVLPWFVRAETN-SRG-------------------
PSKYHGA---EGAMSVEDPRYENG-LVP--------------------LFFEAA-R----
----Q-AGYNS-NADFNNWDREQD-------------GYGT-------------------
----FQVA-MRRGERGDTARMYL---KD--ARG----------RPN-LSVVTGAAATRIA
FEG--------------------------KRAVGVEFVLP-------E------ADARNR
MDANLA-----TGGEVIL------------SSGA-----IHSPQLLMLSGVGAAEDLAEM
DIPVVADLPGVGQNLQDHPACVATY----------DI----NDNI----AVTDQ-IYD--
--------SQ-GAI------------RPSVVAQYLLFRR--GP----LTST---------
GCDRGL---------------FTRSSP--SA-----------------------KQPDLQ
-------------------I---RFVPARALHPDGVSAYS-IFGRL---KELGL--A-W-
-PSG---FSFQII-ACRP-----------HSR-G-----------RVSLRTPSPYD-A--
----PSIDAGFLSDK-----RDLETLKVGLR-----------------------------
---KSREL--A--------------------------------------------STAAF
KS-LIKAEVYPGQE----------EDEKYIRRT--LHSANAVVGTCRMGRN---------
--AT-D----GS--------------VVDA-QLRVH-GLSGLRVID----ASV----MPG
I------IG----GQTG----APAVMIAERAAHMLT------------------------
------------------------------------------------------------
------------------------------------------------------------
------------------------------------------------------------
------------------------------------------------------------
------------------------------------------------------------
------------------------------------------------------------
------------------------------------------------------------
------------------------------------------------------------
------------------------------------------------------------
------------------------------------------------------------
-------------------------------------
>7514247
------------------------------------------------------------
------------------------------------------------------------
------------------------------------------------------------
------------------------------------------------------------
------------------------------------------------------------
------------------------------------------------------------
------------------------------------------------------------
------------------------------------------------------------
------------------------------------------------------------
--------------------------------------------------P---------
----------------SAC------------SCL--------------------------
-------------------------------K-----R----------------------
-----------------------------------------------APTA-----R-TP
-LRRSLRASRG-------------SFNL-----ARGR-----------------------
-LLGGSSSTN---------------------------AALYHRGTAADYD----------
---------AW------GVEGWAARDVLPWFVRAETN-SRG-------------------
PSKYHGA---EGAMSVEDPRYENG-LVP--------------------LFFEAA-R----
----Q-AGYNS-NADFNNWDREQD-------------GYGT-------------------
----FQVA-MRRGERGDTARMYL---KD--ARG----------RPN-LSVVTGAAATRIA
FEG--------------------------KRAVGVEFVLP-------E------ADARNR
MDANLA-----TGGEVIL------------SSGA-----IHSPQLLMLSGVGAAEDLAEM
DIPVVADLPGVGQNLQDHPACVATY----------DI----NDNI----AVTDQ-IYD--
--------SQ-GAI------------RPSVVAQYLLFRR--GP----LTST---------
GCDRGL---------------FTRSSP--SA-----------------------KQPDLQ
-------------------I---RFVPARALHPDGVSAYS-IFGRL---KELGL--A-W-
-PSG---FSFQII-ACRP-----------HSR-G-----------RVSLRTPSPYD-A--
----PSIDAGFLSDK-----RDLETLKVGLR-----------------------------
---KSREL--A--------------------------------------------STAAF
KS-LIKAEVYPGQE----------EDEKYIRRT--LHSANAVVGTCRMGRN---------
--AT-D----GS--------------VVDA-QLRVH-GLSGLRVID----ASV----MPG
I------IG----GQTG----APAVMIAERAAHMLT------------------------
------------------------------------------------------------
------------------------------------------------------------
------------------------------------------------------------
------------------------------------------------------------
------------------------------------------------------------
------------------------------------------------------------
------------------------------------------------------------
------------------------------------------------------------
------------------------------------------------------------
------------------------------------------------------------
-------------------------------------
>25954189
------------------------------------------------------------
------------------------------------------------------------
------------------------------------------------------------
------------------------------------------------------------
------------------------------------------------------------
------------------------------------------------------------
------------------------------------------------------------
------------------------------------------------------------
------------------------------------------------------------
------------------------------------------------------------
-------KYDYIVAGGGTA------------GCVLANR----------------------
---LSQ-D---------------------GSK-----RVLVLEAGT-ADYK---------
------------------------------------------HPYVKIPAGIVKLFK-SR
-LDWDYTSSAGAE-P--GL-TNR-GVYL-----CRGK-----------------------
-VLGGSSCAN---------------------------VMLYHRGTEEDYD----------
---------AW------GVQGWGGAEVLDFFKKSEHF-EGG-------------------
ESKYHGT---GGHYHVSETPYQNT-LCK--------------------SFLEVC-A----
----Q-MGLTN-NPDFNDWGRPQE-------------GYGR-------------------
----FHVA-QSKGERCSAASGYL---AA--AEG----------RGN-LQVLSEVLISKVT
MDG--------------------------GKARGVAFRDK----------------SGQN
VVAELA-----DGGEVIM------------ASGA-----IGSPQLLMLSGIGPAGHLKEQ
GIKPTVDLPGVGQNLQDHPAAVVSY----------KT----EQKL----SVTDE-IRA--
--------GG---FP-----------SPTAFLKWMFFRN--GP----LTSP---------
GCDHGG---------------FFQTHG--GK---------------------DASAPDLQ
-------------------V---RFVPAHASAPDGVATYT-QFGSNWGGS------Q-F-
-QSG---FSFQPI-AVRP-----------QSR-G-----------SLHLASADPAE-K--
----PVISTGYLTDN-----SDLQTLISGIK-----------------------------
---LARDM--A--------------------------------------------SQGPL
AA-LSDSETFPGKAIQ-----SDDDIASYIRST--AHSANAIVGTCAMGTD---------
--PK-S----GA--------------VVNP-SLQVF-GVPNLRVVD----ASV----IPK
I------PG----GQTA----GPVVMIAEKAANII-------------------------
------------------------------------------------------------
------------------------------------------------------------
------------------------------------------------------------
------------------------------------------------------------
------------------------------------------------------------
------------------------------------------------------------
------------------------------------------------------------
------------------------------------------------------------
------------------------------------------------------------
------------------------------------------------------------
-------------------------------------
>79747864
------------------------------------------------------------
------------------------------------------------------------
------------------------------------------------------------
------------------------------------------------------------
------------------------------------------------------------
------------------------------------------------------------
------------------------------------------------------------
------------------------------------------------------------
------------------------------------------------------------
------------------------------------------------------------
------------VAGGGTA------------GCVLANR----------------------
---LSQ-G---------------------GGK-----RVLVLEAGT-GDYT---------
------------------------------------------HPYVKIPAGIVKLFK-SR
-LDWDYTSSAGAE-P--GL-AGR-GVYL-----CRGK-----------------------
-VVGGSSCAN---------------------------VMLYHRGSAADYD----------
---------AW------GVEGWGGADVLDYFKKSEHF-EGG-------------------
ESQYHGA---GGHYYVSETPYQNT-LCK--------------------SFLEVC-S----
----Q-MGLAN-NPDFNDWGRPQE-------------GYGR-------------------
----FHVA-QKQGERCSAASGYL---AA--AEG----------RGN-LEVRSEVHITNVA
MDG--------------------------GKARGVAYRDK----------------AGQD
VVAELA-----EGGEVIM------------ASGA-----IGTPQVLMLSGIGPGAHLRDM
GIGTAVDLPGVGQNLQDHPAAVVSY----------KT----EKKL----SVTDE-IRT--
--------GG---FP-----------SPMAFLRWMMFRN--GP----LTTP---------
GCDHGG---------------FFQTRE--GA---------------------DAGAPDLQ
-------------------V---RFVPAHASAPDGVATYT-KFGSNWGGA------Q-F-
-DSG---FSFQPI-AVRP-----------QSR-G-----------SLRLASADPAA-K--
----PVISTGYLTDP-----ADLQTLISGVR-----------------------------
---LARDM--A--------------------------------------------AQGPL
AA-LSDSETYPGKAVQ-----TDEDLVEYLRST--AHSANAVVGTCAMGAD---------
--PG-A----GA--------------VVDS-SLRVF-GVPNLRVVD----ASV----IPK
L------PG----GQTA----APVVMIAEKAAEMILG-----------------------
------------------------------------------------------------
------------------------------------------------------------
------------------------------------------------------------
------------------------------------------------------------
------------------------------------------------------------
------------------------------------------------------------
------------------------------------------------------------
------------------------------------------------------------
------------------------------------------------------------
------------------------------------------------------------
-------------------------------------
>50856796
------------------------------------------------------------
------------------------------------------------------------
------------------------------------------------------------
------------------------------------------------------------
------------------------------------------------------------
------------------------------------------------------------
------------------------------------------------------------
------------------------------------------------------------
------------------------------------------------------------
------------------------------------------------------------
-------RWDFIVAGGGTA------------GCVLANR----------------------
---LSQ-G---------------------GGK-----RVLVLEAGT-GDYT---------
------------------------------------------HPYVKIPAGIVKLFK-SR
-LDWDYTSSAGAE-P--GL-AGR-GVYL-----CRGK-----------------------
-VVGGSSCAN---------------------------VMLYHRGSAADYD----------
---------AW------GVEGWGGADVLDYFKKSEHF-EGG-------------------
ESQYHGA---GGHYHVSETPYQNT-LCK--------------------SFLEVC-S----
----Q-MGLAN-NPDFNDWGRPQE-------------GYGR-------------------
----FHVA-QKQGERCSAASGYL---AA--AEG----------RGN-LEVRSEVHITNVA
MDG--------------------------GKARGVAYRDK----------------TGQD
ALAELA-----EGGEVIM------------ASGA-----IGTPQLLMLSGIGPGAHLREM
GIETAVDLPGVGQNLQDHPAAVVSY----------KT----EKKL----SVTDE-IRT--
--------GG---FP-----------SPTAFLRWMMFRN--GP----LTTP---------
GCDHGG---------------FFQTRE--GA---------------------GAGSPDLQ
-------------------V---RFVPAHATAPDGVATYT-KFGSNWGGA------Q-F-
-DSG---FSFQPI-AVRP-----------QSR-G-----------SLRLASTDPAA-K--
----PVISTGYLTEA-----ADLQTLISGVR-----------------------------
---LARDM--A--------------------------------------------AKGPL
AA-LSDSETYPGKAVQ-----TDEDLAGYLRST--AHSANAIVGTCAMGAD---------
--PG-A----GA--------------VVDS-SLRVF-GVPNMRVVD----ASV----IPK
L------PG----GQTA----GPVVMIAEKAADIILG-----------------------
------------------------------------------------------------
------------------------------------------------------------
------------------------------------------------------------
------------------------------------------------------------
------------------------------------------------------------
------------------------------------------------------------
------------------------------------------------------------
------------------------------------------------------------
------------------------------------------------------------
------------------------------------------------------------
-------------------------------------
>86475228
------------------------------------------------------------
------------------------------------------------------------
------------------------------------------------------------
------------------------------------------------------------
------------------------------------------------------------
------------------------------------------------------------
------------------------------------------------------------
------------------------------------------------------------
------------------------------------------------------------
-------------------------------------------------AP---------
---PAEETWDYILVGGGAA------------GCVLAER----------------------
---LSQ-D---------------------PEN-----RVLVLEAGN-DGSR---------
------------------------------------------DMRIRVPAGLVKVFK-SE
-YDWDFETEPVE-----GT--NR-GVYL-----CRGK-----------------------
-VLGGSSCTN---------------------------VMLYHRGTPADYD----------
---------SWVQQ---GAVGWGPSEVLDYYRRAENN-IDG-------------------
PSQYHGT---GGPMPVADVPYINT-LSA--------------------AFLEAC-G----
----N-LGYRR-NPDFNDWSAPQD-------------GFGR-------------------
----FKVT-QNNGERCSAHNAYL---QGAGALK----------RPN-LTVRQGAHVTRVR
LEGGEA----------------------ELCASGVEYTDG---------------AGGAP
TAAQLA-----PGGEVLL------------CAGA-----VQSPQVLMLSGVGPRAELEAL
GIEVRKELPGVGGGLQDHPAVLVSY----------GA----TKRV----SVTDE-IKW--
--------FG-SSLP-----------NPITLLRWLLWKR--GA----LTSV---------
ACEHGG---------------FFRTAK--GF-----------------------SQPDLQ
-------------------V---RFIAARAMSPDGISTLE-KMGAG---E------R-M-
-QPG---YTTQII-AIRP-----------QSA-G-----------RVRLRSADPMD-K--
----PVLENVHLSDD-----ADVATLREGIK-----------------------------
---LGRKL--C--------------------------------------------QCPEF
EP-YRDAEVYPSAAVQ-----SDDEIDSYVRAT--VHSANALTGSCRMGHD---------
--SD-P----NA--------------VLDP-ELRVR-GIGSLRVID----ASA----MPH
I------IG----GQTC----APTIMMAEKGADMV-------------------------
------------------------------------------------------------
------------------------------------------------------------
------------------------------------------------------------
------------------------------------------------------------
------------------------------------------------------------
------------------------------------------------------------
------------------------------------------------------------
------------------------------------------------------------
------------------------------------------------------------
------------------------------------------------------------
-------------------------------------
>110043841
------------------------------------------------------------
------------------------------------------------------------
------------------------------------------------------------
------------------------------------------------------------
------------------------------------------------------------
------------------------------------------------------------
------------------------------------------------------------
------------------------------------------------------------
------------------------------------------------------------
------------------------------------------------------------
--------FDYIIVGGGAA------------GCVLANR----------------------
---LSA-D---------------------PAH-----RVLLIEAGG-DASR---------
------------------------------------------DKRAQVPWAFTKLLR-SE
-YDWDFHVEAEA-----AV-NQQ-EVYL-----CRGK-----------------------
-ALGGSSVTN---------------------------VMLYHRGSPADYD----------
---------AWEEA---GARGWGAKDVLPYYLRVEDY-GDG-------------------
ASQYHAV---GGHVSVQEVPYQNQ-LSA--------------------TFLRAM-G----
----Q-LGFRP-NGDFNDWSSPQE-------------GYGR-------------------
----YKVT-QRAGRRCTAADGYL---AA--ARE----------RAN-LVVVTGAQATRLA
LDSAYDG-------------------AGRLQVSGVEFARG---------------DEREP
CSVRLA-----RGGEAVL------------CAGA-----VQTPHLLLLSGIGPAEHLREV
GVAVRADLPGVGSGLQDHPAVVVSY----------ES----KKAV----AATDD-ALL--
--------KGYASLV-----------NPLAMLRWLLFGR--GP----LACA---------
ACDHGG---------------FVRSSP--DL-----------------------DQPDVQ
-------------------I---RFVPARASSASGMNTLI-DLGRR---A------R-F-
-LPG---FSTQVV-ACRP-----------RSE-G-----------RVRLRSADPFA-K--
----PIIEGIHLGAA-----EDVASLRHGIR-----------------------------
---LGRQV--C--------------------------------------------AAAAF
DE-YRGEEVFPGAAVQ-----SDEQIDEYIRSS--VHSANALTSSCRMGDP---------
--SD-P----AA--------------VLDS-HLRVR-GVGGLRVAD----ASA----MPR
I------IG----GQTQ----APTYMLAERAADIL-------------------------
------------------------------------------------------------
------------------------------------------------------------
------------------------------------------------------------
------------------------------------------------------------
------------------------------------------------------------
------------------------------------------------------------
------------------------------------------------------------
------------------------------------------------------------
------------------------------------------------------------
------------------------------------------------------------
-------------------------------------
>44088452
------------------------------------------------------------
----------------------K-------------------------------------
------------------------------------------------------------
------------------------------------------------------------
------------------------------------------------------------
------------------------------------------------------------
------------------------------------------------------------
------------------------------------------------------------
------------------------------------------------------------
-------------------------SVRSAT--------------AADAQA---------
---AAAGEWDFIIVGGGTA------------GCVLANR----------------------
---LSA-S---------------------GEK-----RVLLLEAGSDKSLS---------
------------------------------------------SLMFRIPAGILGLFL-SE
-HDWAFQSSAQK-----NA-SSR-QIYC-----ARGK-----------------------
-VLGGSSSIN---------------------------VLLYNRGDAADYD----------
---------LWETQ--YGCTGWGAKSVLPHFVQNQDD-QSGL---------------AAK
NPKHHGT---GGMWTTDNVRYQNV-LSR--------------------TFLAAC-G----
----M-VGIGQ-NDDFNDWSKPQA-------------GAGR-------------------
----FLVS-ERNGARCCAATSYL---TA--ALG----------RKN-LTVLTGVYARKLV
IKK--------------------------NTCTGVQFALG--------------KDSSAT
FEAGIA-----ADGEVVC------------AGGA-----VQTPQLLMLSGVGPKAHLAEH
GIPLVLDLPAVGQNLQDQPAGVVSY----------AV-KPEFKGI----SSSSD-ARM--
--------PN-TVYP-----------NPRSVLQWLCARR--GV----LTST---------
GCDHGA---------------FVPVAN--E------------------------ASPRLQ
-------------------L---RFLATRAVTADGMGSFT-TFRKT---P------N-H-
-PDG---FSVQAI-AARP-----------KCR-G-----------SIKLRSANPED-R--
----PLLDYDWLNDE------DRATIREGIR-----------------------------
---LGRQI--A--------------------------------------------KTAAF
EK-YKAEEVFPGEAIV-----TDAQLDEYLDQS--VHSANALVGTCRMGPK---------
--EK------DT--------------VVDS-ALRVH-GVAQLRIAD----ASV----FPQ
L------PG----GQSG----APTVMVAERASEFL-------------------------
------------------------------------------------------------
------------------------------------------------------------
------------------------------------------------------------
------------------------------------------------------------
------------------------------------------------------------
------------------------------------------------------------
------------------------------------------------------------
------------------------------------------------------------
------------------------------------------------------------
------------------------------------------------------------
-------------------------------------
>65816066
------------------------------------------------------------
------------------------------------------------------------
------------------------------------------------------------
------------------------------------------------------------
------------------------------------------------------------
------------------------------------------------------------
------------------------------------------------------------
------------------------------------------------------------
------------------------------------------------------------
--------------------------VRPAT--------------QADAAE---------
---VTRNSWDYIIVGGGTA------------GCVLANR----------------------
---LSK-G---------------------GSK-----RVLVLEAGS-ADHD---------
------------------------------------------NTMVRIPAGVLRLFR-TE
-YDWNYETQNES-----AT-SGR-GIYL-----CRGK-----------------------
-TLGGSSSLN---------------------------VLLYTRGDAHDYD----------
---------LWETK--FGCKGWRGCDVLPHFKRTEDD-HTGL---------------AAK
DKKHHAV---GGEWAVDHVRYQNV-LSK--------------------KFLQAC-E----
----E-AGFGY-NDDFNNWDRSQE-------------GFGR-------------------
----FPVS-QRDGNRCDAASSML---AP--ASADS--------TRI-LKVLTGAPVQKII
FDG--------------------------TAAKGVQFTA-----------------EGFQ
HVARLA-----TGGEVLL------------TGGA-----INSPHLLMVSGVGPKKHLAEH
SIPLVADVPAVGQNLQDHPAAVVSY----------EC-PESKKGV----SVTSK-LRI--
--------AG-TSLP-----------HPWPMLEWMLSKG--GV----LTST---------
GCDHGG---------------FVRTSA--AA--------------------ANCPSPDLQ
-------------------M---RFLAARAVTADGMGTFA-SFKKT---T------A-H-
-PDG---FSFQCV-AARP-----------ESR-G-----------RVLLASADPSQ-K--
----PIVEGNYLTNK-----ADVATIREGLR-----------------------------
---LARTL--A--------------------------------------------KQKAF
AE-YLGDEVFPGPGVD-----TDSQLDKYIADS--IHTANAIVGTCRMGEA---------
--SD-P----QA--------------AVDP-MMCVK-GVQGLRVCD----ASV----MPK
L------PG----GQTG----SSTVMIAERASDLI-------------------------
------------------------------------------------------------
------------------------------------------------------------
------------------------------------------------------------
------------------------------------------------------------
------------------------------------------------------------
------------------------------------------------------------
------------------------------------------------------------
------------------------------------------------------------
------------------------------------------------------------
------------------------------------------------------------
-------------------------------------
>65802654
------------------------------------------------------------
------------------------------------------------------------
------------------------------------------------------------
------------------------------------------------------------
------------------------------------------------------------
------------------------------------------------------------
------------------------------------------------------------
------------------------------------------------------------
------------------------------------------------------------
--------------------------VRAAT--------------QAEAAE---------
---VTRSSWDYIIVGGGTA------------GCVLANR----------------------
---LSR-G---------------------GQK-----RVLVLEAGS-ADHN---------
------------------------------------------NSMVRIPAGVLRLFR-TE
-YDWNFETQNEP-----AT-SGR-GIYL-----CRGK-----------------------
-TLGGSSALN---------------------------VLLYTRGNAHDYD----------
---------LWETK--FGCKGWRGCDVLPHFTRTQDD-RTGL---------------AAN
DKKHHAV---GGEWAVDHVRYQNI-LSK--------------------TFLQAC-A----
----E-AGFKL-NDDFNNWEHSQE-------------GFGR-------------------
----FAVS-QQDGARCDAASSML---AP--ALADS--------SRI-LKVLVGAPVQKII
FDG--------------------------NVTKGVQFTA-----------------EGFQ
HVARLS-----AGGEVLL------------TGGA-----VHSPQLLMVSGVGPAAHLNEH
GISVVADVPAVGQNLQDHPAAVVSY----------QC-PESKTGV----SVTSK-LRI--
--------AG-TTLP-----------HPWPMLEWLFSKS--GV----LTST---------
GCDHGG---------------FVRTSA--AP--------------------SDSLSPDLQ
-------------------M---RFLAARAVTADGMGTFA-SFKKT---T------A-H-
-PDG---FSFQCI-AARP-----------ESR-G-----------RVLLASSDPSK-K--
----PIVEGNYLTSK-----SDVATIREGLR-----------------------------
---LARHL--A--------------------------------------------KQTAF
AE-YLGDEVFPGPGVN-----TDSQLDKYIADS--IHTANALVGTCRMGAP---------
--SD-P----QA--------------AVDP-DMRVK-GVQGLRVCD----ASV----MPK
L------PG----GQTG----SSTVMIAERASDLI-------------------------
------------------------------------------------------------
------------------------------------------------------------
------------------------------------------------------------
------------------------------------------------------------
------------------------------------------------------------
------------------------------------------------------------
------------------------------------------------------------
------------------------------------------------------------
------------------------------------------------------------
------------------------------------------------------------
-------------------------------------
>116393709
------------------------------------------------------------
------------------------------------------------------------
------------------------------------------------------------
------------------------------------------------------------
------------------------------------------------------------
------------------------------------------------------------
------------------------------------------------------------
------------------------------------------------------------
------------------------------------------------------------
-----------------------------------------------AETK---------
---VTSQTYDYIICGGGCA------------GCVLAER----------------------
---LSA-D---------------------GTK-----RVLMLEAGR-PDYD---------
------------------------------------------NTLIRIPAGVLRLFR-SV
-YDWQYESSGEK-----EC-NGR-NIFL-----QRGK-----------------------
-VLGGSSCTN---------------------------VLLHHRGSAKDYD----------
---------DW------NIPGWTGVDVLPFFKMSEGD-KTGR------------------
STKFHGK---DGPWTMDEVRYQNP-LSK--------------------TFLKVG-A----
----A-VGLGS-NEDFNDWSKPQD-------------GFGR-------------------
----FQVS-EDGGVRCSAAAAFL---KP--CKQ----------RKN-LTVRSITMCRRIN
FDQ-------------------------SKTATGVTYDIL-------G------DDTCKE
FKATLK-----EGGEVLV------------TSGA-----LASPQLLMCSGIGPEKDLQEH
GIEVISDLPGVGRNLRDHPAAVVSY----------QT-S--KRGV----SVTSK-LRI--
--------FG-R--T-----------NPLPVLQWLFFKT--GI----LTST---------
GCDHGA---------------FVRTTA--ST----------------------DGQADLQ
-------------------F---RFLAALALGPDGMTTYT-QFLNQ---RS-----R-H-
-EDG---YSIQSV-AIRA-----------KSQ-G-----------SVRLASSNTHV-K--
----PVVDTSYLSHP-----ADLATLREGIK-----------------------------
---LARKL--S--------------------------------------------QRPEW
GE-YLGNEIYPGTNVK-----TDEEIDEYIRNT--LHTANALTGTCKMGTG---------
--KD-------C--------------VVGP-DLKVF-GVNNVRVCD----SSI----FPT
I------PG----GQTA----TPTVMIADRAAAFI-------------------------
------------------------------------------------------------
------------------------------------------------------------
------------------------------------------------------------
------------------------------------------------------------
------------------------------------------------------------
------------------------------------------------------------
------------------------------------------------------------
------------------------------------------------------------
------------------------------------------------------------
------------------------------------------------------------
-------------------------------------
>34828957
------------------------------------------------------------
------------------------------------------------------------
------------------------------------------------------------
------------------------------------------------------------
------------------------------------------------------------
------------------------------------------------------------
------------------------------------------------------------
------------------------------------------------------------
------------------------------------------------------------
------------------------------------------------------------
-------EWDYIIVGGGAA------------GCVLADR----------------------
---LSA-D---------------------GAR-----KVLVLEAGQ-DPSK---------
------------------------------------------DMRVRVPAALVKVFK-SE
-LDWNFQTASVP-----GT--ER-GVYL-----CRGK-----------------------
-ALGGSSSTN---------------------------VMLYHRGTPADYQ----------
---------AWEEK---GATGWGPAEVLPYFRKAEDH-ADG-------------------
PSEYHGV---DGPMPVQDVPYVNP-LSK--------------------AFLEAA-G----
----Q-LGFRR-QHDFNDWSAPQE-------------GFGR-------------------
----FKVT-QNNGERCSAWNAYGSGASGA-AAA----------RAN-LVVKAGCHVTKIA
LDK-------------------------AVVATGVEYTA-----------------SGEQ
CTAKLA-----KGGEVLL------------CAGA-----VQSPHVLMLSGLGPKAHLEQF
GVPVRKDLPGVGVGLQDHPAALVSY----------GS----SQPV----SITDE-IRL--
--------FG-SKYP-----------NPLTTLKWLLFRR--GA----LTTV---------
ACEFGG---------------FFRSPRAKSA-----------------------DQTDIQ
-------------------V---RFIAAKAMNPDGISTLE-KFGAG---A------R-T-
-TPG---FTAQVV-AIRP-----------KSE-G-----------RVRLQSADPFD-K--
----PVLENVHLSSE-----EDVRTLREGIK-----------------------------
---LGRRL--L--------------------------------------------QDSSF
DE-YRTEEVYPGAKVQ-----SDADIDAFIRGS--VHSANALTSSCRMGSE---------
--KD-P----NA--------------VLDA-ELRVR-GVGALRVID----ASA----FPQ
I------PG----GQTC----APTIMVAEKAADLLLG-----------------------
------------------------------------------------------------
------------------------------------------------------------
------------------------------------------------------------
------------------------------------------------------------
------------------------------------------------------------
------------------------------------------------------------
------------------------------------------------------------
------------------------------------------------------------
------------------------------------------------------------
------------------------------------------------------------
-------------------------------------
>50854433
------------------------------------------------------------
------------------------------------------------------------
------------------------------------------------------------
------------------------------------------------------------
------------------------------------------------------------
------------------------------------------------------------
------------------------------------------------------------
------------------------------------------------------------
------------------------------------------------------------
--------------------------IRRAT--------------AADAQA---------
---AAACEWDYIIVGGGTA------------GCILANR----------------------
---LSA-S---------------------GEK-----RVLLLEAGSAKSLT---------
------------------------------------------SLMFRIPAGVLGLFL-SE
-HDWAFQSCAQK-----QA-SNR-QIYC-----ARGK-----------------------
-VLGGSSSIN---------------------------VLLYNRGNAADYD----------
---------LWETK--YGCVGWAAKNVLPYFVKHQDD-RSGL---------------AAK
NPDYHGV---GGMWKTDHVRYQNV-LSR--------------------TFLAAC-G----
----M-MGIGQ-NDDFNDWSTPQT-------------GAGR-------------------
----FLVS-EMNGARCDAAVTYL---AA--ALG----------RPN-LTVLSGVYARKLC
ISN--------------------------NACTGVQFCID----------------GSAT
YEARTA-----SNGEVVC------------TAGA-----MQTPHLLMLSGVGPKAQLAEH
GIPLVKDLPAVGENLQDQPAGVVSY----------GM-KPGFEGI----SSSSE-ARM--
--------PG-TVYP-----------NPRSVMKWLCARR--GV----LTST---------
GCDHGA---------------FISLAD--E------------------------TSPKLQ
-------------------L---RFLATRAVTADGMGSFT-TFRKT---P------N-H-
-PDG---FSIQAI-AARP-----------KCR-G-----------RVTLRSANPDD-K--
----PILDYGWLNDD------DRATLRDGMR-----------------------------
---LARQL--A--------------------------------------------KTAAF
DQ-YRAEEVFPGEAVQ-----TDAELDEYLDQS--VHSANALVGTCRMGPE---------
--GR------DT--------------VVDS-ALRVH-GVARLRIAD----ASV----FPQ
L------PG----GQSG----APTVMVAERASEFL-------------------------
------------------------------------------------------------
------------------------------------------------------------
------------------------------------------------------------
------------------------------------------------------------
------------------------------------------------------------
------------------------------------------------------------
------------------------------------------------------------
------------------------------------------------------------
------------------------------------------------------------
------------------------------------------------------------
-------------------------------------
>82281508
------------------------------------------------------------
------------------------------------------------------------
------------------------------------------------------------
------------------------------------------------------------
------------------------------------------------------------
------------------------------------------------------------
------------------------------------------------------------
------------------------------------------------------------
------------------------------------------------------------
--------------------------IRRAT--------------AAEAQA---------
---AAAAEWDFIIVGGGTA------------GCVLANR----------------------
---LSA-S---------------------GEK-----RVLLLEAGSAKSLA---------
------------------------------------------SLMFRIPAGVLGLFL-SE
-HDWAFQSCAQK-----QA-HNR-QIYC-----ARGK-----------------------
-VLGGSSAIN---------------------------VLLYNRGNAADYD----------
---------LWETK--YGCEGWGAKNVLPYFVKNQDD-RSGL---------------AAK
NPKYHGS---GGTWSTDQVRYQNV-LSR--------------------KFLEAC-E----
----K-LGISK-NDDFNDWSKSQT-------------GAGR-------------------
----FLVS-ERNGARCCAATAYL---AP--ALG----------RSN-LTVLSGVYARKLC
ISN--------------------------NECTGVQFCVN-------DFFGGSSSSASAT
FEARTA-----AGGEVVC------------AGGA-----MQTPQILMLSGVGPKAHLKEH
GIPLVADLPAVGENLQDQPAGVVSF----------SV-KKECKGM----SSSSH-ARL--
--------PG-TVYP-----------DPRVVLQWLTMRR--GV----LTST---------
GCDHGA---------------FVSLAN--E------------------------TSPQLQ
-------------------L---RFLATRAVTADGMGSFT-TFRKT---P------N-H-
-PDG---FSIQAI-AARP-----------RCR-G-----------RITLRSAAPED-R--
----PILDYGWLNDE------DRKTLREGMR-----------------------------
---LGRRL--A--------------------------------------------KTAAF
DQ-YRAEEVFPGEAVQ-----TDAELDEYLDQS--VHSANALVGTCRMGPN---------
--AR------DA--------------VVDS-KLRVH-GVKRLRIAD----ASV----FPQ
L------PG----GQSG----ASTVMVAERASEFL-------------------------
------------------------------------------------------------
------------------------------------------------------------
------------------------------------------------------------
------------------------------------------------------------
------------------------------------------------------------
------------------------------------------------------------
------------------------------------------------------------
------------------------------------------------------------
------------------------------------------------------------
------------------------------------------------------------
-------------------------------------
>41188281
------------------------------------------------------------
------------------------------------------------------------
------------------------------------------------------------
------------------------------------------------------------
------------------------------------------------------------
------------------------------------------------------------
------------------------------------------------------------
------------------------------------------------------------
------------------------------------------------------------
--------------------------IRRAT--------------AAEAQA---------
---AAAAEWDFIIVGGGTA------------GCVLANR----------------------
---LSA-S---------------------GEK-----RVLLLEAGSAKSLA---------
------------------------------------------SLMFRIPAGVLGLFL-SE
-HDWAFQSCAQK-----QA-HNR-QIYC-----ARGK-----------------------
-VLGGSSAIN---------------------------VLLYNRGDAADYD----------
---------LWETK--YGCEGWGAKNVLPYFVKNQDD-RSGL---------------AAK
NPKYHGS---GGTWSTDQVRYQNV-LSR--------------------KFLEAC-E----
----K-LGISK-NDDFNDWSKSQT-------------GAGR-------------------
----FLVS-ERNGARCCAATAYL---AP--ALG----------RSN-LTVLSGVYARKLC
ISN--------------------------NECTGVQFCVN-------DFFGGSSSSASAT
FEARTA-----AGGEVVC------------AGGA-----MQTPQILMLSGVGPKAHLKEH
GIPLVADLPAVGENLQDQPAGVVSF----------SV-KKECKGM----SSSSH-ARL--
--------PG-TVYP-----------DPRVVLQWLTMRR--GV----LTST---------
GCDHGA---------------FVSLAN--E------------------------TSPQLQ
-------------------L---RFLATRAVTADGMGSFT-TFRKT---P------N-H-
-PDG---FSIQAI-AARP-----------RCR-G-----------RITLRSAAPED-R--
----PILDYGWLNDE------DRKTLREGMR-----------------------------
---LGRRL--A--------------------------------------------KTAAF
DQ-YRAEEVFPGEAVQ-----TDAELDEYLDQS--VHSANALVGTCRMGPN---------
--AR------DA--------------VVDS-KLRVH-GVKRLRIAD----ASV----FPQ
L------PG----GQSG----ASTVMVAERASEFL-------------------------
------------------------------------------------------------
------------------------------------------------------------
------------------------------------------------------------
------------------------------------------------------------
------------------------------------------------------------
------------------------------------------------------------
------------------------------------------------------------
------------------------------------------------------------
------------------------------------------------------------
------------------------------------------------------------
-------------------------------------
>55798257
------------------------------------------------------------
------------------------------------------------------------
------------------------------------------------------------
------------------------------------------------------------
------------------------------------------------------------
------------------------------------------------------------
------------------------------------------------------------
------------------------------------------------------------
------------------------------------------------------------
------------------------------------------------ATE---------
---AAGGKYDYILAGGGTA------------ACVLANR----------------------
---LSKWA---------------------PDK-----RILVLEAGK-DNFD---------
------------------------------------------HPYVKIPSAIARLFK-SD
-LDWNFTSAKQEE-PGLGS-NHG-GVYL-----CRGK-----------------------
-VLGGSSCTN---------------------------VLLYNRGTANDYD----------
---------GW------ECPGWGAKDVLKYFMRSENN-HD-----------------ASS
SAKFHSR---DGPFDVNPIQYKSV-LTE--------------------SFLDAG-V----
----S-FGFEK-NDDFNNWDRSQQ-------------GVGP-------------------
----FHVA-QHRGVRTSAASAYL---SE--VMG----------KSN-VTILTEALVKKVK
LEG--------------------------KHARGVHFSK-----------------AGVD
ATALLK-----DGGEVIL------------TAGA-----VGSPHILMLSGIGPREHLGEH
GIACVADLP-VGSNLQDHPAALVTY----------TI----DKPL----ALTDE-FKFG-
-------GLGIPMLP-----------NPMPILRWFFGGS--GP----LTSV---------
GCDHGG---------------FFKTDD--SK-----------------------AEPDLQ
-------------------M---RFISGFSKDPYGISNYA-QYAKEW--W------K-W-
-PSG---FTFQNI-CVRP-----------KSK-G-----------HVRLRSGDPED-K--
----PVISTGYLTQP-----DDLASIRNGIK-----------------------------
---LSRKL--A--------------------------------------------RSSAF
SR-FNPVELHPGPNVQ-----TDAELDDYIRAS--AHSGNALVGSCRMGQD---------
--PK------HC--------------VVDA-ELRVN-GIAGLRVVD----SSV----IPQ
I------PG----GQTC----SATLMIAEKGAEMIHGQ----------------------
------------------------------------------------------------
------------------------------------------------------------
------------------------------------------------------------
------------------------------------------------------------
------------------------------------------------------------
------------------------------------------------------------
------------------------------------------------------------
------------------------------------------------------------
------------------------------------------------------------
------------------------------------------------------------
-------------------------------------
>65942239
------------------------------------------------------------
------------------------------------------------------------
------------------------------------------------------------
------------------------------------------------------------
------------------------------------------------------------
------------------------------------------------------------
------------------------------------------------------------
------------------------------------------------------------
------------------------------------------------------------
------------------------------------------------------------
--------WDYIIVGGGTA------------GCVLANR----------------------
---LSK-G---------------------GQK-----RVLVLEAGV-ADHN---------
------------------------------------------SIMVRIPAGVLRLFR-TE
-YDWNFETQNEP-----AT-SGR-GIYL-----CRGK-----------------------
-TLGGSSSLN---------------------------VLLYTRGNAHDYD----------
---------LWETN--FGCKGWRGCDVLPHFTRTQDD-RTGL---------------AAN
DTKHHAV---GGEWAVDHVRYQNI-LSK--------------------TFLQAC-A----
----E-AGFKL-NDDFNNWERSQE-------------GFGR-------------------
----FAVS-QQDGARCDAASSML---AP--ALADS--------SRI-LKVLTGAPVQKII
FDG--------------------------NVTKGVQFTA-----------------EGFQ
HVARLS-----AGGEVLL------------TGGA-----IHSPQLLMVSGVGPAAHLNEH
GISVVADVPAVGQNLQDHPAAVVSY----------QC-PESKKGV----SVTSK-LRI--
--------KG-TSLP-----------CPFHMLEWLWSKS--GV----LTST---------
GCDHGG---------------FVRTSA--AP--------------------SDSLSPDLQ
-------------------M---RFLAARAVTADGMGTFA-SFKKT---T------A-H-
-PDG---FSFQCI-AARP-----------ESR-G-----------RVLLASADPNK-K--
----PIVEGNYLTSK-----SDVATIREGLR-----------------------------
---LARKL--A--------------------------------------------KQTAF
AE-YLGDEVFPGLGVD-----TDSQLDKYIADS--IHTANALVGTCRMGAP---------
--SD-P----QA--------------AVDP-DMRVK-GVQGLRVCD----ASV----MPK
L------PG----GQTG----SSTVMIAERASDLILTG----------------------
------------------------------------------------------------
------------------------------------------------------------
------------------------------------------------------------
------------------------------------------------------------
------------------------------------------------------------
------------------------------------------------------------
------------------------------------------------------------
------------------------------------------------------------
------------------------------------------------------------
------------------------------------------------------------
-------------------------------------
>53444378
------------------------------------------------------------
------------------------------------------------------------
------------------------------------------------------------
------------------------------------------------------------
------------------------------------------------------------
------------------------------------------------------------
------------------------------------------------------------
------------------------------------------------------------
------------------------------------------------------------
------------------------------------------------------------
---------DFIIVGGGTA------------GCVLANR----------------------
---LSA-S---------------------GEK-----RVLLLEAGSDKSLS---------
------------------------------------------SLMFRIPAGILGLFL-SE
-HDWAFQSSAQK-----NA-SSR-QIYC-----ARGK-----------------------
-VLGGSSSIN---------------------------VLLYNRGDAADYD----------
---------LWETQ--YGCTGWGAKSVLPHFVQNQDD-QSGL---------------AAK
NPKHHGT---GGMWTTDNVRYQNV-LSR--------------------TFLAAC-G----
----M-VGIGQ-NDDFNDWSKPQA-------------GAGR-------------------
----FLVS-ERNGARCCAATSYL---TA--ALG----------RKN-LTVLTGVYARKLV
IKK--------------------------NTCTGVQFALG--------------KDSSAT
FEAGIA-----ADGEVVC------------AGGA-----VQTPQLLMLSGVGPKAHLAEH
GIPLVLDLPAVGQNLQDQPAGVVSY----------AV-KPEFKGI----SSSSD-ARM--
--------PN-TVYP-----------NPRSVLQWLCARRGVGV----LTST---------
GCDHGA---------------FVPVAN--E------------------------ASPRLQ
-------------------L---RFLATRAVTADGMGSFT-TFRKT---P------N-H-
-PDG---FSVQAI-AARP-----------KCR-G-----------SIKLRSANPED-R--
----PLLDYDWLNDE------DRATIREGIR-----------------------------
---LGRQI--A--------------------------------------------KTAAF
EK-YKAEEVFPGEAIV-----TDAQLDEYLDQS--VHSANALVGTCRMGPK---------
--EK------DT--------------VVDS-ALRVH-GVAQLRIAD----ASV----FPQ
L------PG----GQSG----APTVMVAERASEFL-------------------------
------------------------------------------------------------
------------------------------------------------------------
------------------------------------------------------------
------------------------------------------------------------
------------------------------------------------------------
------------------------------------------------------------
------------------------------------------------------------
------------------------------------------------------------
------------------------------------------------------------
------------------------------------------------------------
-------------------------------------
>88594881
------------------------------------------------------------
------------------------------------------------------------
------------------------------------------------------------
------------------------------------------------------------
------------------------------------------------------------
------------------------------------------------------------
------------------------------------------------------------
------------------------------------------------------------
------------------------------------------------------------
------------------------------------------------------------
--------WDYIIIGGGAA------------GCVLAER----------------------
---LSA-D---------------------PAT-----RVLVLEAGQ-DPSK---------
------------------------------------------DMRVRVPAALVKVFK-SE
-LDWNFQTAPVQ-----GT--DR-GVYL-----CRGK-----------------------
-ALGGSSSTN---------------------------VMLYHRGTPADYE----------
---------QWEAK---GAKGWGPTDVLPYFRKAEDN-AEG-------------------
PSEYHGV---DGPMPVQDVPYVNP-LSR--------------------AFLAAA-G----
----Q-LGFRR-THDFNDWSTPQE-------------GFGR-------------------
----FKVT-QNNGERCSAWNAYG---AG--ASA----------RPN-LTVRAGCHVTKIA
LDK-------------------------AVVATGVEYKQ-----------------GGEA
CTAKLA-----KGGEVLL------------CAGA-----VQSPHVLMLSGLGPKAHLEEH
GVPVRKDIPGVGVGLQDHPTALVSY----------GS----SQKV----SITDE-IRL--
--------FG-SGYP-----------NPLTTLKWLLFRR--GA----LTTV---------
ACEFGG---------------FFRTPRA-ET-----------------------AQADLQ
-------------------V---RFIAAKAMNADGISTLE-KFGAG---A------R-T-
-TPG---FTTQVV-AIRP-----------KSE-G-----------RVRMQSADPFD-K--
----PVLENVHLSND-----EDVRTLREGIK-----------------------------
---LGRRL--L--------------------------------------------QAQSF
DE-YRTEEVYPGAKVQ-----SDADIDAFVRSS--VHSANALTSSCRMGAD---------
--KD-P----MA--------------VLDA-ELRVR-GVGALRVID----ASV----FPE
I------PG----GQTC----APTIMVAEKAADMLLAGK---------------------
------------------------------------------------------------
------------------------------------------------------------
------------------------------------------------------------
------------------------------------------------------------
------------------------------------------------------------
------------------------------------------------------------
------------------------------------------------------------
------------------------------------------------------------
------------------------------------------------------------
------------------------------------------------------------
-------------------------------------
>84957631
------------------------------------------------------------
------------------------------------------------------------
------------------------------------------------------------
------------------------------------------------------------
------------------------------------------------------------
------------------------------------------------------------
------------------------------------------------------------
------------------------------------------------------------
------------------------------------------------------------
----------------------------------------------RLLST---------
---SSNSSYKYILVGGGTA------------SCVLAKR----------------------
---LVKED---------------------PGS-----KVLVLEAGS-PDFE---------
------------------------------------------HKYIKIPSAVVRLFK-SD
-MDWDFTSSSQSE-KGLDP-NHE-GVYL-----CRGK-----------------------
-VLGGSSCTN---------------------------VLLYNRGSAGDYD----------
---------NW------KVPGWSSSEVLKYFKKSENN-H------------------AGV
DDKFHGK---SGPFNVDPVQYTTE-LTS--------------------TFLDAG-A----
----A-AGYSR-NNDFNDWDKGQA-------------GVGP-------------------
----FHVM-QHNGVRTSAASAFL---SK--VMH----------DPQ-LDVVTGAQVSKIE
IDSGGK--------------------SKNSAAKGVSYTK-----------------DGQA
MTASIE-----DGGEIIL------------AAGA-----VGSPHLLMLSGIGPKEHLKEH
GIDCVADLP-VGENLQDHPAAVVCF----------KV----DKKV----ALTDE-FKF--
--------FGISGIP-----------SPMPLLKWLLGSK--GP----LTSV---------
GCDYGG---------------FFKTSE--AK-----------------------EDPDLQ
-------------------M---RFIPALAQSPLGISNYK-EYGEKW--L------S-W-
-PSG---FTFQNI-CCRP-----------KSK-G-----------YIRLKSSNYHD-K--
----PIISTGYLSSD-----EDVVSIRNGLK-----------------------------
---LSRKL--G--------------------------------------------SSEQF
KK-YNPVELFPGPEVQ-----SDEELDSYIRRS--AHSANALVGSCKMGVD---------
--AK------TC--------------VVDP-ELRVN-GVDALRVID----SSV----MPV
L------PG----GQTC----SSTVMIAEKGADLL-------------------------
------------------------------------------------------------
------------------------------------------------------------
------------------------------------------------------------
------------------------------------------------------------
------------------------------------------------------------
------------------------------------------------------------
------------------------------------------------------------
------------------------------------------------------------
------------------------------------------------------------
------------------------------------------------------------
-------------------------------------
>46497577
------------------------------------------------------------
------------------------------------------------------------
------------------------------------------------------------
------------------------------------------------------------
------------------------------------------------------------
------------------------------------------------------------
------------------------------------------------------------
------------------------------------------------------------
------------------------------------------------------------
------------------------------------------------------------
--------WDFIIVGGGTA------------GCVLANR----------------------
---LSA-S---------------------GEK-----RVLLLEAGSAKSLA---------
------------------------------------------SLMFRIPAGVLGLFL-SE
-HDWAFQSCAQK-----QA-HNR-QIYC-----ARGK-----------------------
-VLGGSSAIN---------------------------VLLYNRGNAADYD----------
---------LWETK--YGCEGWGAKNVLPYFVKNQDD-RSGL---------------AAK
NPKYHGS---GGTWSTDQVRYQNV-LSR--------------------KFLEAC-E----
----K-LGISK-NDDFNDWSKSQT-------------GAGR-------------------
----FLVS-ERNGARCCAATAYL---AP--ALG----------RSN-LTVLSGVYARKLC
ISN--------------------------NECTGVQFCVN-------DFFGGSSSSASAT
FEARTA-----AGGEVVC------------AGGA-----MQTPQILMLSGVGPKAHLKEH
GIPLVADLPAVGENLQDQPAGVVSF----------SV-KKECKGM----SSSSH-ARL--
--------PG-TVYP-----------DPRVVLQWLTMRR--GV----LTST---------
GCDHGA---------------FVSLAN--E------------------------TSPQLQ
-------------------L---RFLATRAVTADGMGSFT-TFRKT---P------N-H-
-PDG---FSIQAI-AARP-----------RCR-G-----------RITLRSAAPED-R--
----PILDYGWLNDE------DRATLREGMR-----------------------------
---LGRRL--A--------------------------------------------KTAAF
DQ-YRAEEVFPGEAVQ-----TDAELDEYLDQS--VHSANALVGTCRMGPN---------
--AR------DA--------------VVDS-KLRVH-GVKRLRIAD----ASV----FPQ
L------PG----GQSG----ASTVMVAERASEFL-------------------------
------------------------------------------------------------
------------------------------------------------------------
------------------------------------------------------------
------------------------------------------------------------
------------------------------------------------------------
------------------------------------------------------------
------------------------------------------------------------
------------------------------------------------------------
------------------------------------------------------------
------------------------------------------------------------
-------------------------------------
>41185939
------------------------------------------------------------
------------------------------------------------------------
------------------------------------------------------------
------------------------------------------------------------
------------------------------------------------------------
------------------------------------------------------------
------------------------------------------------------------
------------------------------------------------------------
------------------------------------------------------------
------------------------------------------------------------
-------EWDYIIVGGGAA------------GCVLADR----------------------
---LSA-D---------------------GAR-----KVLVLEAGQ-DPSK---------
------------------------------------------DMRVRVPAALVKVFK-SE
-LDWNFQTAAVP-----GT--ER-GVYL-----CRGK-----------------------
-ALGGSSSTN---------------------------VMLYHRGTPADYQ----------
---------AWEEK---GATGWGPAEVLPYFRKAEDH-ADG-------------------
PSEYHGV---DGPMPVQDVPYVNP-LSR--------------------AFLAAA-G----
----Q-LGFRR-QHDFNDWSAPQE-------------GFGR-------------------
----FKVT-QNNGERCSAWNAYG---SGA-AAA----------RAN-LVVKAGCHVTKIA
LDK-------------------------AVVATGVEYTA-----------------AGEQ
CTAKLA-----KGGEVLL------------CAGA-----VQSPHVLMLSGLGPKAHLEQF
GVPVRKDLPGVGVGLQDHPAALVSY----------GS----SQPV----SITDE-IRL--
--------FG-SKYP-----------NPLTTLKWLLFRR--GA----LTTV---------
ACEFGG---------------FFRSPRAKAA-----------------------DQTDLQ
-------------------V---RFIAAKAMNPDGISTLE-KFGAG---A------R-T-
-TPG---FTAQVV-AIRP-----------KSE-G-----------RVRLQSADPFD-K--
----PVLENVHLSSE-----EDVHTLREGIK-----------------------------
---LGRRL--L--------------------------------------------QDSSF
DE-YRTEEVYPGAKVQ-----SDADLDAFIRGS--VHSANALTSSCRMGSE---------
--KD-P----NA--------------VLDA-ELRVR-GVGALRVID----ASA----FPQ
I------PG----GQTC----APTIMVAEKAADLL-------------------------
------------------------------------------------------------
------------------------------------------------------------
------------------------------------------------------------
------------------------------------------------------------
------------------------------------------------------------
------------------------------------------------------------
------------------------------------------------------------
------------------------------------------------------------
------------------------------------------------------------
------------------------------------------------------------
-------------------------------------
>112381351
------------------------------------------------------------
------------------------------------------------------------
------------------------------------------------------------
------------------------------------------------------------
------------------------------------------------------------
------------------------------------------------------------
------------------------------------------------------------
------------------------------------------------------------
------------------------------------------------------------
------------------------------------------------------------
---VTSKTYDYIIAGGGLA------------GCVLADR----------------------
---LSA-D---------------------GTK-----KVLVLEAGR-SDYN---------
------------------------------------------NIKIRIPAGILRLFR-SV
-YDWQHETSGEK-----GC-NGR-NIFL-----QRGK-----------------------
-VLGGSSCTN---------------------------VQLHMRGTAQDYN----------
---------DW------NVPGWTAADVLPYFKKSEDD-KTGR------------------
SSEFHST---GGEWCMDEVRYQNP-LSK--------------------MFLKIG-E----
----E-FGLGV-NDDFNNWSRSQT-------------GVGR-------------------
----FQVS-QKNGERCSGASAFL---KQ--ALK----------RKN-LTVKAGVMVRNIN
FDG-------------------------SRTAQGVSYDLM-------G------DETMKI
FKASLN-----QGGEVIV------------CAGA-----IASPQLLMCSGIGPAEHLISN
GIPVVSDCPGVGQNLQDHPAAVVSY----------KT-S--KRGV----SVTSK-LRL--
--------LG-M--T-----------NPFPILNWGIFKR--GL----LTSV---------
GCDHGA---------------FVKTSA--S-----------------------NGQPDLQ
-------------------M---RFLPAKALTPDGMTSFT-QFRYT---K------R-Y-
-EDG---YSFQSI-VARA-----------KSC-G-----------RVRLASSNIHT-K--
----PIVDGGYLSDP-----SDLATLREGIK-----------------------------
---LGRKL--G--------------------------------------------QHDSW
EA-YKGEEVYPGPGVQ-----TDEEIDEYIKNT--LHTANALTGTCKMGTG---------
--KD-------A--------------VVGP-DLRVK-GVNGVRVVD----SSI----IPT
I------TG----GQTG----TPTVMIAERASSFL-------------------------
------------------------------------------------------------
------------------------------------------------------------
------------------------------------------------------------
------------------------------------------------------------
------------------------------------------------------------
------------------------------------------------------------
------------------------------------------------------------
------------------------------------------------------------
------------------------------------------------------------
------------------------------------------------------------
-------------------------------------
>78183543
------------------------------------------------------------
------------------------------------------------------------
------------------------------------------------------------
------------------------------------------------------------
------------------------------------------------------------
------------------------------------------------------------
------------------------------------------------------------
------------------------------------------------------------
------------------------------------------------------------
--------------------------IRRAT--------------AAEAQA---------
---AAAAEWDFIIVGGGTA------------GCVLANR----------------------
---LSA-S---------------------GEK-----RVLLLEAGSAKSLA---------
------------------------------------------SLMFRIPAGVLGLFL-SE
-HDWAFQSCAQK-----QA-HNR-QIYC-----ARGK-----------------------
-VLGGSSAIN---------------------------VLLYNRGDAADYD----------
---------LWETK--YGCEGWGAKNVLPYFVKNQDD-RSGL---------------AAK
NPKYHGS---GGTWSTDQVRYQNV-LSR--------------------KFLEAC-E----
----M-LGISK-NDDFNDWSKSQT-------------GAGR-------------------
----FLVS-ERNGARCCAATAYL---AP--ALG----------RSN-LTVLSGVYARKLC
ISN--------------------------NECTGVQFCVN-------DFFGGSSSSASAT
FEARTA-----AGGEVVC------------AGGA-----MQTPQILMLSGVGPKAHLKEH
GIPLVADLPAVGENLQDQPAGVVSF----------SV-KKECKGM----SSSSH-ARL--
--------PG-TVYP-----------DPRVVLQWLTMRR--GV----LTST---------
GCDHGA---------------FVSLAN--E------------------------TSPQLQ
-------------------L---RFLATRAVTADGMGSFT-TFRKT---P------N-H-
-PDG---FSIQAI-AARP-----------RCR-G-----------RITLRSAAPED-R--
----PILDYGWLNDE------DRKTLREGMR-----------------------------
---LGRRL--A--------------------------------------------KSAAF
DQ-YRAEEVFPGEAVQ-----TDAELDEYLDQS--VHSANALVGTCRMGPN---------
--AR------DA--------------VVDS-KLRVH-GVKRLRIAD----ASV----FPQ
L------PG----GQSG----ASTVMVAERASEFL-------------------------
------------------------------------------------------------
------------------------------------------------------------
------------------------------------------------------------
------------------------------------------------------------
------------------------------------------------------------
------------------------------------------------------------
------------------------------------------------------------
------------------------------------------------------------
------------------------------------------------------------
------------------------------------------------------------
-------------------------------------
>62684973
------------------------------------------------------------
------------------------------------------------------------
------------------------------------------------------------
------------------------------------------------------------
------------------------------------------------------------
------------------------------------------------------------
------------------------------------------------------------
------------------------------------------------------------
------------------------------------------------------------
------------------------------------------------------------
---IAAQAWDYIIVGGGTA------------GCVLANR----------------------
---LSA-K---------------------TRK-----RVLVLEAGS-GDYN---------
------------------------------------------ATRIRIPAGVLDLFQ-SK
-CDWNFRTSSEP----VAT-SND-GIYL-----CRGK-----------------------
-VLGGSSSVS---------------------------VMLYNRGSANDYN----------
---------TWRDE--FGLDGWGAEDVLPYFRRTENA-HIEL----------------GA
NPDYHGF---GGEWSVSNVRYQNP-LSK--------------------SFLDAC-N----
----E-AGLPA-NPDFNDWSRTQE-------------GAGR-------------------
----FAVS-QLNGARASSASAFL---AP--ALADERT------GRH-LRVACGIQVNRIV
VEG--------------------------GAASGVEFMLA-------N------GDVSER
FTAHLH-----PAGEVLL------------ASGA-----IHSPQLLMLSGIGPKEHLKAH
GIPLVRDMPGVGENLQDHPAANVSY----------EC-PASAQGV----SPTSSCMFI--
--------LG-KKIP-----------HPLWILRWFISGS--GP----LTSP---------
GCDHGG---------------FFKTAA--SAL------------GKAMHEEQLQLEPDLQ
-------------------M---RFLPARAVTADGMNSFA-TFRSI---R------S-L-
-PDG---FSFQSI-AARP-----------HSR-G-----------RVRLASASVRQ-K--
----PLVEGCYLQDH-----RDMATLREGLR-----------------------------
---LSRRL--A--------------------------------------------RQPAF
SS-WLGPEVFPGSEVQ-----SDEQLDTYIAAG--VHTANALVGTCRMGRA---------
--DD-A----AA--------------VCNG-AMQVL-GIAGLRVCD----ASI----VPR
L------PG----GQTA----APTVMIAERAADLVIG-----------------------
------------------------------------------------------------
------------------------------------------------------------
------------------------------------------------------------
------------------------------------------------------------
------------------------------------------------------------
------------------------------------------------------------
------------------------------------------------------------
------------------------------------------------------------
------------------------------------------------------------
------------------------------------------------------------
-------------------------------------
>75819940
------------------------------------------------------------
------------------------------------------------------------
------------------------------------------------------------
------------------------------------------------------------
------------------------------------------------------------
------------------------------------------------------------
------------------------------------------------------------
------------------------------------------------------------
------------------------------------------------------------
------------------------------------------------ASA---------
---AASGEYDYILVGGGTA------------SCVLAKR----------------------
---LLEQD---------------------PNN-----KILVLEAGS-PDYE---------
------------------------------------------HKYIKIPAAVGRLFK-SE
-FDWDYTSSGSTE-GGLGA-NHD-GVYL-----CRGK-----------------------
-VLGGSSCTN---------------------------VLLYNRGSARDYD----------
---------AW------KVPGWGSQDVLDYFKRSEKN-SDFQ---------------VSG
DAKHHGK---DGPLSVSAVRYTNP-LIN--------------------TFLQAS-Y----
----K-AGYAK-NDDFNNWDRDQD-------------GVGP-------------------
----FHVT-QKDGERSSAASAYL---SS--VES----------EAS-LNVVTGAQVQKLD
ICPE------------------------KMEAGGVRYIK-----------------DGNA
IEARVR-----EGGEVIL------------AAGA-----VGSPQLLMLSGIGPKNHLKDL
GIECIADLP-VGENLQDHPAAVVAY----------QV----DKKV----SVTDE-FKL--
--------FG-MGLP-----------SPFPILKYFLSGT--GV----MTSV---------
GCDYGG---------------FFKTAK--SK-----------------------KDPDLQ
-------------------I---RFIGGLATSPMGISNYK-EYAKKW--L------S-W-
-PSG---YTFQNI-CVRP-----------RSK-G-----------YIRLKTANYQD-K--
----PVISTGYLTSD-----EDVESIRNGIK-----------------------------
---LSRKL--G--------------------------------------------SSDEF
KK-FNPVELFPGPAVQ-----TDEEIDAYIRNS--AHSGNALVGSCKMGVD---------
--PK------TS--------------VVDP-ELRVM-GIKSLRVID----SSV----MPV
L------PG----GQTC----SSTLMIAEKGADLL-------------------------
------------------------------------------------------------
------------------------------------------------------------
------------------------------------------------------------
------------------------------------------------------------
------------------------------------------------------------
------------------------------------------------------------
------------------------------------------------------------
------------------------------------------------------------
------------------------------------------------------------
------------------------------------------------------------
-------------------------------------
>32629575
------------------------------------------------------------
------------------------------------------------------------
------------------------------------------------------------
------------------------------------------------------------
------------------------------------------------------------
------------------------------------------------------------
------------------------------------------------------------
------------------------------------------------------------
------------------------------------------------------------
--------------------------IRRAT--------------AADAQA---------
---AAACEWDYIIVGGGTA------------GCVLANR----------------------
---LSA-S---------------------GEK-----RVLLLEAGSAKSLS---------
------------------------------------------SLMFRIPAGVLGLFL-SE
-HDWAFQSCAQK-----QA-QNR-QIYC-----ARGK-----------------------
-VLGGSSAIN---------------------------VLLYNRGNAADYD----------
---------LWETK--YGCDGWGAKDVLKYFVK---------------------------
---HHGS---GGTWGTDNVRYQNV-LSR--------------------TFLAAC-G----
----K-LGIGP-NDDFNDWSKPQT-------------GAGR-------------------
----FLVS-ERNGARCCAATAYL---AP--ALG----------RSN-LTVLSGVYARKLS
ISN--------------------------NACTGVQFCID----------------SSAT
FEARTA-----SDGEVVC------------AGGA-----MQTPQMLMLSGIGPKAQLKEH
GIPLVADLPAVGENLQDQPAGVVSY----------AV-KPQFKGI----SSSSE-ARM--
--------PG-TVYP-----------NPRSVLKWLCARR--GV----LTST---------
GCDHGA---------------FISLAN--E------------------------TSPRLQ
-------------------L---RFLATRAVTADGMGSFT-TFRKT---P------N-H-
-PDG---FSIQSI-AARP-----------LCR-G-----------RVMLKSASPED-R--
----PILDYDWLNDE------DRATLREGMR-----------------------------
---LARRI--A--------------------------------------------KTASF
DQ-YRAEEVFPGEAIQ-----SDAELNEYLDQS--VHSANALVGTCRMGPD---------
--AR------DT--------------VVDS-RLRVH-GVARLRIAD----ASV----FPQ
L------PG----GQSG----APTVMVAERASEFL-------------------------
------------------------------------------------------------
------------------------------------------------------------
------------------------------------------------------------
------------------------------------------------------------
------------------------------------------------------------
------------------------------------------------------------
------------------------------------------------------------
------------------------------------------------------------
------------------------------------------------------------
------------------------------------------------------------
-------------------------------------
>116393708
------------------------------------------------------------
------------------------------------------------------------
------------------------------------------------------------
------------------------------------------------------------
------------------------------------------------------------
------------------------------------------------------------
------------------------------------------------------------
------------------------------------------------------------
------------------------------------------------------------
-----------------------------------------------AETK---------
---VTSQTYDYIICGGGCA------------GCVLAER----------------------
---LSA-D---------------------GTK-----RVLMLEAGR-PDYD---------
------------------------------------------NTLIRIPAGVLRLFR-SV
-YDWQYESSGEK-----EC-NGR-NIFL-----QRGK-----------------------
-VLGGSSCTN---------------------------VLLHHRGSAKDYD----------
---------DW------NIPGWTGVDVLPFFKMSEGD-KTGR------------------
STKFHGK---DGPWTMDEVRYQNP-LSK--------------------TFLKVG-A----
----A-VGLGS-NEDFNDWSKPQD-------------GFGR-------------------
----FQVS-EDGGVRCSAAAAFL---KP--CKQ----------RKN-LTVRSITMCRRIN
FDQ-------------------------SKTATGVTYDIL-------G------DDTCKE
FKATLK-----EGGEVLV------------TSGA-----LASPQLLMCSGIGPEKDLQEH
GIEVISDLPGVGRNLRDHPAAVVSY----------QT-S--KRGV----SVTSK-LRI--
--------FG-R--T-----------NPLPVLQWLFFKT--GI----LTST---------
GCDHGA---------------FVRTTA--ST----------------------DGQADLQ
-------------------F---RFLAALALGPDGMTTYT-QFLNQ---RS-----R-H-
VSWG---YSIQSV-AIRA-----------KSQ-G-----------SVRLASSNTHV-K--
----PVVDTSYLSHP-----ADLATLREGIK-----------------------------
---LARKL--S--------------------------------------------QRPEW
GE-YLGNEIYPGTNVK-----TDEEIDEYIRNT--LHTANALTGTCKMGTG---------
--KD-------C--------------VVGP-DLKVF-GVNNVRVCD----SSI----FPT
I------PG----GQTA----TPTVMIADRAAAFI-------------------------
------------------------------------------------------------
------------------------------------------------------------
------------------------------------------------------------
------------------------------------------------------------
------------------------------------------------------------
------------------------------------------------------------
------------------------------------------------------------
------------------------------------------------------------
------------------------------------------------------------
------------------------------------------------------------
-------------------------------------
>95083276
------------------------------------------------------------
------------------------------------------------------------
------------------------------------------------------------
------------------------------------------------------------
------------------------------------------------------------
------------------------------------------------------------
------------------------------------------------------------
------------------------------------------------------------
------------------------------------------------------------
------------------------------------------------------------
---VAKTSYDYIIAGGGTA------------GCVLANR----------------------
---LSE-D---------------------PSK-----KVLVLEAGD-RGPN---------
------------------------------------------SPLVKIPVAILKLFK-SA
-YDWNFATKPSE-----AV-ADR-SLYV-----CRGK-----------------------
-GLGGSSLTN---------------------------VMLYNRGSAGDYD----------
---------AWAAA--CGDDSWGAEEMLGYFKKAEDC-LVPA----------------HR
ANHYHGV---GGPYASSHVPYTNE-MST--------------------AFVESA-V----
----E-DGGVR-NGDFNDWSTSQV-------------GFGR-------------------
----FAVS-QRKGARVDAATAYLP--RK--VRR----------RKN-LDVVRGAALSGVT
WNA--------------------------NKATGVEFAFG--------------------
GVQGIA-----CGGEVIL------------SGGA-----VHSPQMLMLSGVGAKAQLEEF
GIPVVADRPGVGKNLQDHPACLVSW----------RG-SAKAQGK----SHSTQ-LRI--
--------PG-TTKT-----------SPKALLQWLFLGR--GP----LASP---------
GCDHGG---------------FAKVGA--GD-----------------------GDCDVQ
-------------------F---RFLATKSITPDGMSTISDSYEAA---V------D-H-
-PDG---LTIQTI-VARP-----------KSRAG-----------EVKLASRDPAA-K--
----PVISNAYLDDE-----ADVMTMVKALQ-----------------------------
---KARSI--A--------------------------------------------SRAPL
SA-YAGNEEFPGEDVA-----DERALAAYVRNT--AHTANAVVGTCKMGES---------
--SD-A----LA--------------VVDN-HLKVI-GVSNLRVVD----ASV----MPT
L------PG----GQTA----ASTIALAEKAADLIKG-----------------------
------------------------------------------------------------
------------------------------------------------------------
------------------------------------------------------------
------------------------------------------------------------
------------------------------------------------------------
------------------------------------------------------------
------------------------------------------------------------
------------------------------------------------------------
------------------------------------------------------------
------------------------------------------------------------
-------------------------------------
>51495918
------------------------------------------------------------
------------------------------------------------------------
------------------------------------------------------------
------------------------------------------------------------
------------------------------------------------------------
------------------------------------------------------------
------------------------------------------------------------
------------------------------------------------------------
------------------------------------------------------------
------------------------------------------------ASA---------
---AASGEYDYILVGGGTA------------SCVLAKR----------------------
---LLEQD---------------------PNN-----KILVLEAGS-PDYG---------
------------------------------------------HKYIKIPAAVGRLFK-SD
-FDWDYTSSGSTE-GGLGA-NHE-GVYL-----CRGK-----------------------
-VLGGSSCTN---------------------------VLLYNRGSARDYD----------
---------AW------KVPGWGSQDVLDYFKRSEKN-SDFQ---------------VSG
DTKHHGK---DGPLSVSAVRYTNP-LIN--------------------TFLQAS-Y----
----K-AGYAK-NDDFNNWDRDQD-------------GVGP-------------------
----FHVA-QKDGERSSAASAYL---SS--VEA----------EAS-LSVVTGAQVQKLD
ICPE------------------------KREAGGVRYVK-----------------DGAA
VEARVR-----EGGEVIL------------AAGA-----VGSPQLLMLSGIGPKKHLKDL
GIDCIADLP-VGQNLQDHPAAVVAY----------QV----DKKV----SVTDE-FKL--
--------FG-LGLP-----------SPFPILKYFLSGT--GV----MTSV---------
GCDYGG---------------FFKTAE--TK-----------------------KDPDLQ
-------------------I---RFIGGLATSPMGISNYS-EYAKKW--L------S-W-
-PSG---YTFQNI-CVRP-----------RSK-G-----------YIRLKTSNYQD-K--
----PVISTGYLTSD-----EDVESIRNGIK-----------------------------
---LSREL--G--------------------------------------------SSEEF
KK-FNPVELFPGPAVQ-----TDEEIDAYIRNS--AHSGNALVGSCKMGTD---------
--PK------TS--------------VVDP-ELRVV-GIKSLRVID----SSV----MPV
L------PG----GQTC----SSTLMIAEKGADLL-------------------------
------------------------------------------------------------
------------------------------------------------------------
------------------------------------------------------------
------------------------------------------------------------
------------------------------------------------------------
------------------------------------------------------------
------------------------------------------------------------
------------------------------------------------------------
------------------------------------------------------------
------------------------------------------------------------
-------------------------------------
>116725553
------------------------------------------------------------
------------------------------------------------------------
------------------------------------------------------------
------------------------------------------------------------
------------------------------------------------------------
------------------------------------------------------------
------------------------------------------------------------
------------------------------------------------------------
------------------------------------------------------------
------------------------------------------------------------
----ADDEFDYVIVGGGTA------------GCVLANR----------------------
---LSA-D---------------------ERT-----RVLLLEPGP-SARG---------
------------------------------------------ALKVTVPVALVKLFN-SE
-WDWSFKAHPRA-----ET-NLRPNIHL-----ARGR-----------------------
-ALGGSGATN---------------------------ALLYHRGTAADFD----------
---------AW------GCDGWGSAEMLHAFKRVEGQ-RRRT----------------LR
SSPFHSV---SGPVSVEDARYTNS-LST--------------------RFVEAA-V----
----A-QGHAR-RNDFNDWSEEQD-------------GVGK-------------------
----FQLQ-TRRGRRVHAAASHL---RP--ALR----------RPN-LEVRTSARVTRVL
LDDPRDSGKA------------------AARAVGVAYADE-------A------GGGGEE
RR---------ASGEVVL------------CAGA-----VGTPQLLLLSGIGPRAHLTSH
GLATRVDLPGVGAHLADQPAVVNSH----------KI----SRPI----SITDH-MLL--
--------RG-TGVL-----------HPARLAQWALRGS--GP----LSST---------
GCDYGG---------------FFKVGP--GSI---AAETGAEPATADAADAASGLQPNLQ
-------------------L---RFVSGLGTQPDGVSSYE-DIGKA---G------M-P-
-DSG---MTFQSI-AVRP-----------VSR-G-----------RVELDSTDPLA-P--
----PRLWPGFCEAA-----QDVATLREGIR-----------------------------
---LARRL--A--------------------------------------------ASEAF
DD-VRGEEVWPGTAVT-----SDAELDEYIRAN--VHSANALAGSCRMGSA---------
--ND-EXXXXEA--------------VVDT-RLRVR-GVESLRVAD----ASI----MPA
M------PG----AQLG----ATVFAIAEKAADILLG-----------------------
------------------------------------------------------------
------------------------------------------------------------
------------------------------------------------------------
------------------------------------------------------------
------------------------------------------------------------
------------------------------------------------------------
------------------------------------------------------------
------------------------------------------------------------
------------------------------------------------------------
------------------------------------------------------------
-------------------------------------
>80074550
------------------------------------------------------------
------------------------------------------------------------
------------------------------------------------------------
------------------------------------------------------------
------------------------------------------------------------
------------------------------------------------------------
------------------------------------------------------------
------------------------------------------------------------
------------------------------------------------------------
------------------------------------------------STT---------
---ASADKYNYILVGGGTA------------SCVLAKR----------------------
---LLETN---------------------PEH-----KILVLEAGS-PDFE---------
------------------------------------------HKHIKIPAAIGNLFK-SD
-KDWDFTSSSESE-SGLGP-SHQ-GVYL-----CRGK-----------------------
-VLGGSSCTN---------------------------VLLYNRGSARDYD----------
---------KW------KIPGWSSSNVLEYFKKSENN-HDHE---------------VSA
DSKFHGS---GGLFDVSPVQYKNP-LIS--------------------AFMSAC-R----
----S-AGFST-NNDFNNWDKGQT-------------GVGP-------------------
----FHVA-QHKGVRSSAASAFL---SS--VMN----------DPQ-LDLVTGAQVSKIE
IDRESQG-------------------QQGGAAKGVHYKK-----------------DGQT
LSASIE-----EGGEIIL------------AAGA-----VGSPHILMLSGVGPKEHLEQH
GIECINDLP-VGENLQDHPAAVVAY----------AT----DKKV----SVTDE-FKL--
--------FGISNVP-----------NPLPFLQYLLTGK--GI----MTSV---------
GCDHGG---------------FFKTSA--AK-----------------------EDPDLQ
-------------------V---RFIGGLAQSPIGISNYE-EYGRRW--L------S-W-
-PSG---FTFQNI-AVRP-----------KSK-G-----------SVRLKTGNYSD-K--
----PVLSTGYLTSD-----EDIVSIRNGIK-----------------------------
---LSRKL--G--------------------------------------------ESEEF
KA-YNPVEVFPGPDVQ-----TDEEIDDYIRSS--AHSGNALVGSCKMGVD---------
--PK------TS--------------VVDP-ELRVN-GIKSLRVID----SSV----MPV
I------PG----GQTC----ASTIMIAEKGAELL-------------------------
------------------------------------------------------------
------------------------------------------------------------
------------------------------------------------------------
------------------------------------------------------------
------------------------------------------------------------
------------------------------------------------------------
------------------------------------------------------------
------------------------------------------------------------
------------------------------------------------------------
------------------------------------------------------------
-------------------------------------
>80060596
------------------------------------------------------------
------------------------------------------------------------
------------------------------------------------------------
------------------------------------------------------------
------------------------------------------------------------
------------------------------------------------------------
------------------------------------------------------------
------------------------------------------------------------
------------------------------------------------------------
-----------------------------------------------SSAA---------
---AASDSYHYILVGGGTA------------SCVLAKR----------------------
---LLETN---------------------PGY-----KILVLEAGS-PDFE---------
------------------------------------------HKHIKIPAAVGRLFK-SD
-KDWDHTSSRENE-PGLGP-GHD-GVYL-----CRGK-----------------------
-VLGGSSCTN---------------------------VLLYNRGSARDYD----------
---------KW------QIPEWSSSQVLNYFKKSENN-H------------------AVS
DEKFHGK---DGPFDVDPVQYTNP-LIS--------------------AFFEAS-H----
----S-AGYNR-NNDFNNWDKGQT-------------GVGP-------------------
----FHVA-QHNGVRSSAASAYL---SS--VIN----------DPQ-LEVVTGAQVSKID
IDKSSRGAG-QGKQ------------QTKGVAKGVTFKK-----------------DGRS
HSATIE-----EGGEIIL------------AAGA-----VGSPHLLMLSGIGPKEHLQDH
GIECIADLP-VGENLQDHPAAVVAY----------TI----DKKA----SVTDE-FKF--
--------MGMSNIP-----------NPVPFLQYLMSGK--GV----MTSV---------
GCDHGG---------------FFKTSE--AK-----------------------EDPDLQ
-------------------I---RFISGLAQSPHGISNYD-EYASKW--L------S-W-
-PSG---YTMQNI-CVRP-----------QSK-G-----------SIRLKSSNYHD-K--
----PIISTGYLTSP-----EDVVTIRNGIK-----------------------------
---LSREL--G--------------------------------------------SSKEF
QK-YNPVELFPGPAVQ-----TDEEIDDYIRSS--AHSGNALVGSCKMGTD---------
--PK------NA--------------VVDP-ELRVN-GISSLRVID----SSI----MPI
L------PG----GQTC----ASTLMIAEKGADLL-------------------------
------------------------------------------------------------
------------------------------------------------------------
------------------------------------------------------------
------------------------------------------------------------
------------------------------------------------------------
------------------------------------------------------------
------------------------------------------------------------
------------------------------------------------------------
------------------------------------------------------------
------------------------------------------------------------
-------------------------------------
>18715199
------------------------------------------------------------
------------------------------------------------------------
------------------------------------------------------------
------------------------------------------------------------
------------------------------------------------------------
------------------------------------------------------------
------------------------------------------------------------
------------------------------------------------------------
------------------------------------------------------------
-----------------------------------------------SSAA---------
---AASDSYHYILVGGGTA------------SCVLAKR----------------------
---LLETN---------------------PGY-----KILVLEAGS-PDFE---------
------------------------------------------HKHIKIPAAVGRLFK-SD
-KDWDHTSSRENE-PGLGP-GHD-GVYL-----CRGK-----------------------
-VLGGSSCTN---------------------------VLLYNRGSARDYD----------
---------KW------QIPEWSSSQVLNYFKKSENN-H------------------AVS
DEKFHGK---DGPFDVDPVQYTNP-LIS--------------------AFFEAS-H----
----S-AGYNR-NHDFNNWDKGQS-------------GVGP-------------------
----FHVA-QHNGVRSSAASAYL---SS--VIN----------DPQ-LEVVTGAQVSKID
IDKSSRGAG-QGKQ------------QTKGVAKGVTFKK-----------------DGRS
HSATIE-----EGGEIIL------------AAGA-----VGSPHLLMLSGIGPKEHLQDH
GIECIADLP-VGENLQDHPAAVVAY----------TI----DKKA----SVTDE-FKF--
--------MGMSNIP-----------NPVPFLQYLMSGK--GV----MTSV---------
GCDHGG---------------FFKTSE--AK-----------------------EDPDLQ
-------------------I---RFISGLAQSPHGISNYD-EYASKW--L------S-W-
-PSG---YTMQNI-CVRP-----------QSK-G-----------SIRLKSSNYHD-K--
----PIISTGYLTSP-----EDVVTIRNGIK-----------------------------
---LSREL--G--------------------------------------------SSKEF
QK-YNPVELFPGPAVQ-----TDEEIDDYIRSS--AHSGNALVGSCKMGTD---------
--PK------NA--------------VVDP-ELRVN-GISSLRVID----SSI----MPI
L------PG----GQTC----ASTLMIAEKGADLL-------------------------
------------------------------------------------------------
------------------------------------------------------------
------------------------------------------------------------
------------------------------------------------------------
------------------------------------------------------------
------------------------------------------------------------
------------------------------------------------------------
------------------------------------------------------------
------------------------------------------------------------
------------------------------------------------------------
-------------------------------------
>112829216
------------------------------------------------------------
------------------------------------------------------------
------------------------------------------------------------
------------------------------------------------------------
------------------------------------------------------------
------------------------------------------------------------
------------------------------------------------------------
------------------------------------------------------------
------------------------------------------------------------
------------------------------------------------------------
------KSYDYIIAGGGLA------------GCVLAER----------------------
---LTS-D---------------------GKS-----KVLMLEAGR-SDYN---------
------------------------------------------TLFIRIPAGILRLFR-SV
-YDWQYETSGEE-----DC-EGR-NIYL-----QRGM-----------------------
-VLGGSSCTN---------------------------VLLYHRGSAMDYD----------
---------SW------KVPGWTSSDVLPFFKLSEDD-KIGK------------------
SSDYHSK---GGEWTVDQVRYQNP-LSK--------------------AFLTVAHD----
----E-WGLPY-NDDFNNWSRSQE-------------GIGR-------------------
----YDVN-EKNGERVSGASGFL---SK--AIK----------RKN-LTVRSGAMVRKIE
FDE-------------------------SKTAKSITYDLM-------G------DDTGDT
FSAKLA-----DGGEVIV------------TGGA-----IASPQILMCSGIGPRKELESL
GINVIADLDGVGQNLQDHPAAVVSF----------TT-P--KKGV----SVTSK-LRI--
--------FG-L--S-----------NPFPLLRWLLFKT--GL----LTST---------
GCDHGA---------------FIKVGE--NV-----------------------EQPNLQ
-------------------L---RFLPAKALTPDGMTTFT-KFRTA---K------T-L-
-EDG---YSFQSI-AVRS-----------KNR-G-----------EVKLASSNTHT-K--
----PIIDLKYLHDR-----DDLITLREGIK-----------------------------
---LTRKL--G--------------------------------------------RSSKW
NE-YLGEEVFPGPEVN-----SDEEIEDYIRRS--VHTSNALTGTCKMGLG---------
--DD-------C--------------VVTP-DLKVR-GVQGVRVAD----SSI----LPQ
I------IG----GQTA----TPTVMIAEKAAAFLKAK----------------------
------------------------------------------------------------
------------------------------------------------------------
------------------------------------------------------------
------------------------------------------------------------
------------------------------------------------------------
------------------------------------------------------------
------------------------------------------------------------
------------------------------------------------------------
------------------------------------------------------------
------------------------------------------------------------
-------------------------------------
>53422642
------------------------------------------------------------
------------------------------------------------------------
------------------------------------------------------------
------------------------------------------------------------
------------------------------------------------------------
------------------------------------------------------------
------------------------------------------------------------
------------------------------------------------------------
------------------------------------------------------------
------------------------------------------------------------
--------YDYIIAGGGLS------------GCVLAER----------------------
---LSQ-D---------------------PSK-----RVLLLEAGS-ADYK---------
------------------------------------------NKFIKIPAGILRLFK-SG
-FDWQHETKGDK-----AA-SGR-NIFL-----ARGK-----------------------
-VLGGSSCTN---------------------------VLLHHRGSKADYD----------
---------EW------G-NGWSGDDVLPYFLKSQDD-TTGR---------------AEN
SPKYHSK---GGEWTMSEVRYQNP-LSK--------------------KFLEVG-G----
----E-V-LGN-NDDFNNWDRKQQ-------------GAGR-------------------
----FQVS-ERNGCRESGATAFL---EK--ALK----------REN-LEVRTSAMIRHVD
FVS--------------------------AAAVGVTYNIV-------G------DDTNAN
FSPVLS-----QGGEVIL------------AAGA-----IASPQILMASGVGPKEHLEDL
SIPVISDLPGVGENLQDHPAAVVSF----------ET-P--KKGV----SVTSK-LRI--
--------KG-TKLN-----------NPIPILKWFLRGK--GE----LTSV---------
GCDHGA---------------FVSTAG--S------------------------NEPDLQ
-------------------M---RFLPARAMGPDGMTTFT-QFRNT---K------N-H-
-ADG---YSFQPV-ATRA-----------KSR-G-----------RVRLASSNTHV-K--
----PVIDGGYLSDE-----SDLATLREGIK-----------------------------
---LGRKL--G----------------------------------------------AQF
GE-YTGEEVFPGTDVQ-----TDEQIDQYIRDS--VHTANAIVGTCKMGAP---------
--SD-R----SA--------------VVTP-DLKVK-GVTGLRVVD----SSV----FPT
I------PG----GQTG----TPTVMVAERAAEFI-------------------------
------------------------------------------------------------
------------------------------------------------------------
------------------------------------------------------------
------------------------------------------------------------
------------------------------------------------------------
------------------------------------------------------------
------------------------------------------------------------
------------------------------------------------------------
------------------------------------------------------------
------------------------------------------------------------
-------------------------------------
>44292113
------------------------------------------------------------
------------------------------------------------------------
------------------------------------------------------------
------------------------------------------------------------
------------------------------------------------------------
------------------------------------------------------------
------------------------------------------------------------
------------------------------------------------------------
------------------------------------------------------------
------------------------------------------------------------
---VVRRTWDYIVVGGGTA------------GCVIANR----------------------
---LTA-----------------------AGK-----RVLVLEAGR-ADYD---------
------------------------------------------ATLVQMPAGLLRLFR-SK
-YDWNFTTSNEA-----KT-SGR-GIYL-----PRGK-----------------------
-VLGGSSALN---------------------------VLLYNRGDANDFN----------
---------LWEEK--FGCQGWKADDVLPYFKRTEDN-QTGL---------------AKS
DPKHHST---GGEWSVDHVRYQNP-LSK--------------------RFLEAC-K----
----Q-MGLPG-NNDFNSWGHKQE-------------GAGR-------------------
----FFVS-ERRGTRCSAASAML---EP--ALKDE--------KRC-IKVLCGSPVQRIL
FTED------------------------GVKAAGVHFTN-----------------GGVD
HVAQLA-----PGGEVLL------------TGGA-----IHSPQLLMLSGLGPAAHLQEH
GIKIVKDLPGVGENFQDHPAAVVSY----------QC-PDAKRGI----SISSE-MRI--
--------FG---LP-----------NPIPMLKWFLFRS--GP----LTSP---------
ACDHGG---------------FFRTAA--AS-------------------EEDAKSPDLQ
-------------------M---RFLAARAITADGMSTSC-DFQKT---A------K-H-
-PDG---FSFQSV-AVRP-----------HSR-G-----------RVRLASANPSD-K--
----PTIEGNYLTDA-----RDMATLREGLR-----------------------------
---LSRKI--A--------------------------------------------KQPAF
AE-YLGFEVFPGPQFQ-----TDEQLDAYIAST--VHTANAIVGTCRMGQA---------
--ED-P----QA--------------VCDP-KMRVH-GMEGLRVCD----SSV----MPK
M------PG----AQTG----ATTVMIAERAADMI-------------------------
------------------------------------------------------------
------------------------------------------------------------
------------------------------------------------------------
------------------------------------------------------------
------------------------------------------------------------
------------------------------------------------------------
------------------------------------------------------------
------------------------------------------------------------
------------------------------------------------------------
------------------------------------------------------------
-------------------------------------
>115097845
------------------------------------------------------------
------------------------------------------------------------
------------------------------------------------------------
------------------------------------------------------------
------------------------------------------------------------
------------------------------------------------------------
------------------------------------------------------------
------------------------------------------------------------
------------------------------------------------------------
-------------------------KNIRKA--------------HAAEEK---------
---VSGEEYDYIIAGGGLA------------GTVLAER----------------------
---LTA-D---------------------GTK-----NVLMLEAGS-ADYK---------
------------------------------------------NKFINIPAGILRLFK-SS
-FDWDYETKGEK-----AC-NGR-NVYF-----ARGK-----------------------
-VLGGSSCLN---------------------------VLLHHRGTNKDYD----------
---------DW------GVPGWGSADVLEYFKMSHDD-LTNR------------------
DPAYHGK---GGEWTMDEVKYQNP-LSK--------------------KFLEVG-A----
----A-AGLGT-NDDFNNWGREQD-------------GVGR-------------------
----FQVS-AKKGARVSGASAFL---SK--AIK----------RKN-LSVRTGTMVRRIN
FDS-------------------------SKTSTGVTYDLI-------G------DDTMKQ
FSPKLK-----KGGEILV------------TSGA-----IASPQLLMVSGIGPADHLEEN
GIKVVADLPGVGENLQDHPSAVVSF----------KT-P--KKGI----SVTSK-LRI--
--------PG-TTIT-----------NPLHAFRWLFFGT--GI----LTSV---------
GCDHGA---------------FTKTSA--A-----------------------DGQSDLQ
-------------------V---RFLPAKALSPDGMTTFS-LFRTT---P------N-L-
-EDG---YSFQSV-AVRA-----------RSR-G-----------QVRLASSNTHV-K--
----PSINAGYLADA-----ADMTTLREGIK-----------------------------
---LGRKL--G--------------------------------------------NRDEW
GN-LKGEEVYPGTEVQ-----TDDEIDEYIRNT--VHTANAIVGTCKMGSD---------
--AS-------S--------------VVGP-DLKVH-GVGGVRVID----SSI----IPR
I------MG----GQTG----TPVVMIAERAAAFM-------------------------
------------------------------------------------------------
------------------------------------------------------------
------------------------------------------------------------
------------------------------------------------------------
------------------------------------------------------------
------------------------------------------------------------
------------------------------------------------------------
------------------------------------------------------------
------------------------------------------------------------
------------------------------------------------------------
-------------------------------------
>44283221
------------------------------------------------------------
------------------------------------------------------------
------------------------------------------------------------
------------------------------------------------------------
------------------------------------------------------------
------------------------------------------------------------
------------------------------------------------------------
------------------------------------------------------------
------------------------------------------------------------
-----------------------------------------------SQNK---------
---IAAESYDYIIAGGGLA------------GCLLAER----------------------
---LSA-D---------------------GTK-----SVLMIEAGR-SDYD---------
------------------------------------------NIKIRIPAGILRLFR-SV
-YDWQHETSGEK-----GC-NGR-NVFL-----QRGK-----------------------
-VLGGSSCTN---------------------------VCLHMRGSAQDYN----------
---------DW------QVPGWSAADVLPYFKKSQDD-QTGR------------------
SPEFHGT---GGEWVMDEVKYQNP-LSA--------------------TFLKVG-E----
----T-YGLGT-NDDFNNWSRPQT-------------GVGR-------------------
----YQVS-EKKGERCSGATAFL---SK--ASK----------RKN-LVVQAGAMVRNID
FDD-------------------------SKTATGITYDLM-------G------DDTCTK
FKASLK-----EGGEVIV------------CSGA-----IASPQLLMCSGIGPAEHLEEH
GITVVSDVPGVGENLQDHPAAVVSF----------KT-P--KKGV----SVTSQ-LRL--
--------FG-F--T-----------NPIPVLKWLLFKT--GL----LTST---------
GCDHGG---------------FVCTAA--S-----------------------DGQPDLQ
-------------------V---RFLAAKALGPDGMTTFT-QFRHT---K------I-L-
-EDG---YSFQSV-AARA-----------KSC-G-----------RIRLASSNIHT-K--
----PIIDGGYLSDP-----SDLATLREGIK-----------------------------
---LGRQL--G--------------------------------------------QQDGW
GE-YKGEEVYPGPDVQ-----TDEEIDEYIKNT--LHTANALTGTCKMGCG---------
--DD-------A--------------VVGP-DLRVR-GVNGVRVID----SSV----IPR
I------PG----GQTG----TPTVMIAERAAAFL-------------------------
------------------------------------------------------------
------------------------------------------------------------
------------------------------------------------------------
------------------------------------------------------------
------------------------------------------------------------
------------------------------------------------------------
------------------------------------------------------------
------------------------------------------------------------
------------------------------------------------------------
------------------------------------------------------------
-------------------------------------
>50827628
------------------------------------------------------------
------------------------------------------------------------
------------------------------------------------------------
------------------------------------------------------------
------------------------------------------------------------
------------------------------------------------------------
------------------------------------------------------------
------------------------------------------------------------
------------------------------------------------------------
--------------------------IRPAT--------------VADAKA---------
---AAECEWDFIIVGGGTA------------GCVLANR----------------------
---LSA-S---------------------GEK-----RVLLLEAGSSKSLS---------
------------------------------------------SLMFRIPAGVLGLFL-SE
-HDWAFQSSGQK-----KA-ANR-EIYC-----ARGK-----------------------
-VLGGSSAIN---------------------------VLLYNRGNAADYD----------
---------LWETH--YGCAGWGAETVLPYFVKNQND-HSGL---------------AGK
NPQYHGT---GGLWSTDHVRYQNV-LSR--------------------TFLAAC-G----
----M-LGMGQ-NDDFNDWSKSQT-------------GAGR-------------------
----FLVS-QSNGARCCAATSHL---AA--ALG----------RPN-LTVLTGVYARKLN
ISN--------------------------NSCTGVQFCMG-------N------WDSTQT
FDARTA-----ADGEVVC------------TGGA-----VQTPQLLMLSGVGPKAHLAEH
GIPVVVDLPAVGENLQDQPAGVVSY----------GV-KPAYKGI----SSSSD-ARM--
--------PG-TVYP-----------NPRSVMKWLLARR--GV----LTST---------
GCDHGA---------------FVPIGN--E------------------------TSPSLQ
-------------------L---RFLATRAVTADGMGSFT-TFRKT---P------N-H-
-PDG---FSIQAI-AARP-----------RCR-G-----------SIKLRSAAPED-R--
----PILDYGWLNDE------DRKTLREGLR-----------------------------
---LARRI--A--------------------------------------------KTSAF
DQ-YRAEEVFPGKAIE-----TDAEIDEYLDQS--VHSANALVGTCRMGPD---------
--AH------DT--------------VVDS-ALRVH-GVAGLRIAD----ASV----FPQ
L------PG----GQSG----APTVMVAERASEFL-------------------------
------------------------------------------------------------
------------------------------------------------------------
------------------------------------------------------------
------------------------------------------------------------
------------------------------------------------------------
------------------------------------------------------------
------------------------------------------------------------
------------------------------------------------------------
------------------------------------------------------------
------------------------------------------------------------
-------------------------------------
>40728245
------------------------------------------------------------
------------------------------------------------------------
------------------------------------------------------------
------------------------------------------------------------
------------------------------------------------------------
------------------------------------------------------------
------------------------------------------------------------
------------------------------------------------------------
------------------------------------------------------------
--------------------------IRRAT--------------EADAKA---------
---AAASEWDFIIVGGGTA------------GCVLANR----------------------
---LSA-S---------------------GEK-----RVLLLEAGSDKSMS---------
------------------------------------------SLMFKIPAGILGLFL-SE
-HDWAFQSCAQK-----QA-QNR-QIYC-----ARGK-----------------------
-VLGGSSSIN---------------------------VLLYNRGNAADYD----------
---------LWETK--YGCDGWGAKEVLPYFVENQDD-RSGL---------------GAK
NPKYHGT---GGIWKTDHVRYQNV-LSK--------------------KFIAAC-G----
----M-LGIGP-NDDFNDWSKPQT-------------GAGR-------------------
----FLVS-QNNGARCCAATSYL---AA--ALG----------RPN-LTVLSGVYARKLC
ISN--------------------------NTCTGVQFGIG----------------SSAT
FEVKTA-----SNGEVVC------------AGGA-----MQTPQMLMLSGIGPKAQLKEH
GIPLVADLPAVGENLQDQPAGVVSY----------AV-KPNWKGI----SSSSE-ARM--
--------PG-TVYP-----------SPYSVSKWLCARR--GV----LTST---------
GCDHGA---------------FISLGK--E------------------------TSPKLQ
-------------------M---RFLATRAVTADGMGSFT-TFRKT---P------N-H-
-PDG---FSFQSI-AVRP-----------ACR-G-----------RVTLRSKAPED-R--
----PILDYDWLRAE------DRATMREGMR-----------------------------
---LARKL--A--------------------------------------------KTDEF
KD-YIAEEVFPGEAIQ-----TDAELDEYLDQS--VHSANALVGSCRMGPN---------
--AK------DA--------------VVDT-RLRVH-GIARLRVAD----ASV----FPQ
L------PG----GQSG----APTVMVAERASEFL-------------------------
------------------------------------------------------------
------------------------------------------------------------
------------------------------------------------------------
------------------------------------------------------------
------------------------------------------------------------
------------------------------------------------------------
------------------------------------------------------------
------------------------------------------------------------
------------------------------------------------------------
------------------------------------------------------------
-------------------------------------
>86460246
------------------------------------------------------------
------------------------------------------------------------
------------------------------------------------------------
------------------------------------------------------------
------------------------------------------------------------
------------------------------------------------------------
------------------------------------------------------------
------------------------------------------------------------
------------------------------------------------------------
------------------------------------------------SAE---------
---VPQEEWDYIILGGGAA------------GCVLANR----------------------
---LSA-D---------------------PSN-----RVLVLEAGG-DASR---------
------------------------------------------DLKVRIPAMLIKVLR-SE
-IDWNFETVPDG-----PC--DH-SVYL-----CRGK-----------------------
-TLGGSSCTN---------------------------VQLYHRGTETDYK----------
---------AWEQA---GATGWGPKDVLPYFRKSERY-LAG-------------------
ASKYHGA---EGEMAVGEGPYLNP-LSE--------------------VFFNAV-G----
----E-LGFRR-NHDFSDWSAPQE-------------GFGR-------------------
----FKLT-QEHGERVSAATTFL---KD--ARH----------RPN-LCVRTGAHATKLV
LEGNN-----------------------DIAAKGVEYLS-----------------GGVA
KTALLA-----SRGEVLM------------AAGA-----VQSPQLLMLSGIGPRSHLEEL
GITVRKELNGVGQGLQDHPAVLVSY----------ES----KKKC----SLTDH-IRL--
--------WG-TPLP-----------NPATLLDWFVRGK--GA----LTTV---------
ACEQGG---------------FFRTRP--DK-----------------------PEADLQ
-------------------M---RFVPERAMSPDGMNSLV-KMGSG---N------V-A-
-KAG---FTFQLL-ACRP-----------QAR-G-----------RVRLRDADPFS-K--
----PLVENLYLSHG----SNDLQTLREAIK-----------------------------
---FSRSI--C--------------------------------------------QASAF
DG-VRGKEIYPGEEVQ-----SNADIDRYVRET--LHSANALTGSCRMGAA---------
--ND-P----LA--------------VLDP-QLRVR-GVRGLRVVD----ASA----IPK
I------PG----GQTV----APTIMIAEKAA----------------------------
------------------------------------------------------------
------------------------------------------------------------
------------------------------------------------------------
------------------------------------------------------------
------------------------------------------------------------
------------------------------------------------------------
------------------------------------------------------------
------------------------------------------------------------
------------------------------------------------------------
------------------------------------------------------------
-------------------------------------
>112729464
------------------------------------------------------------
------------------------------------------------------------
------------------------------------------------------------
------------------------------------------------------------
------------------------------------------------------------
------------------------------------------------------------
------------------------------------------------------------
------------------------------------------------------------
------------------------------------------------------------
------------------------------------------------------------
------EEWDYIILGAGAA------------GCVLANR----------------------
---LTA-D---------------------PSV-----RVLVLEAGD-DASS---------
------------------------------------------DLKVRIPAMLIKVLR-SD
-MDWNFETEPDT-----AL-NDH-PVYL-----CRGK-----------------------
-TLGGSTCAN---------------------------VQLYHRGTETDYK----------
---------SWEQA---GAVGWGPSDVLPYFRKSESY-HGG-------------------
SDKYHGG---DGPMTVSQVPYFNP-LSA--------------------VFFEAV-G----
----E-LGHRH-NHDFNDWSAPQE-------------GFGR-------------------
----YSVT-QRNGERISTANTYL---KQ--AQG----------RPN-LSVRTGAHVSRLL
LEGAN-----------------------DLTTTGVSYMQ-----------------RGNE
KAAKLA-----AGGEVLL------------AAGA-----VQSPQILMLSGIGPRAHLEDH
GIKVRKEVDGVGQGLQDHPAVLVSY----------ES----KRAC----SLTDH-IRL--
--------WG-TALP-----------NPLTLLNWFVRGK--GA----LATV---------
ACEQGG---------------FFRTTP--DK-----------------------AQPDLQ
-------------------L---RFVPERSMSPDGMNSLQ-KMGSG---A------I-A-
-KSG---FTFQCL-ACRP-----------QAR-G-----------RVRLRDANPLS-K--
----PLVEGLYLSQG----SSDLATLREGIK-----------------------------
---LGRRV--C--------------------------------------------QTKAF
EG-VRGEELYPGADVV-----SDEAIESYVRTT--IHSANALTGSCRMGTA---------
--AD-P----LA--------------VLDP-QLRVR-GVRALRVVD----ASA----MPR
I------PG----GQTC----APTIMIAEKAADVI-------------------------
------------------------------------------------------------
------------------------------------------------------------
------------------------------------------------------------
------------------------------------------------------------
------------------------------------------------------------
------------------------------------------------------------
------------------------------------------------------------
------------------------------------------------------------
------------------------------------------------------------
------------------------------------------------------------
-------------------------------------
>56788639
------------------------------------------------------------
------------------------------------------------------------
------------------------------------------------------------
------------------------------------------------------------
------------------------------------------------------------
------------------------------------------------------------
------------------------------------------------------------
------------------------------------------------------------
------------------------------------------------------------
------------------------------------------------------------
--------WDYIIVGGGTA------------GCVLANR----------------------
---LTA-----------------------AKK-----KVLVLEAGR-ADYD---------
------------------------------------------TTLVRMPAGLLRLFR-SK
-YDWDFTSSNEA-----RT-SGR-GIYL-----PRGK-----------------------
-VLGGSSSLN---------------------------VLLYNRGDANDYN----------
---------LWAEE--FGCQGWKADDVLPYFKRSEDN-QTGL---------------AAS
DPKHHST---GGEWSVDHVRYQNT-LSK--------------------RFLEAC-K----
----Q-MGLPL-NNDFNSWGRKQD-------------GAGR-------------------
----FFVS-ERKGSRCSAASAML---EP--ALKDK--------KRC-IKVLCGSPVQRIL
FTED------------------------GAKAAGVHFST-----------------DGAD
HIAQLA-----PGGEVLL------------TGGA-----IHSPQLLMLSGLGPAQHLQKH
GIKLVRDLPGVGENFQDHPAAVVSY----------QC-PDAQRGI----SISSE-MRV--
--------CG-TSLP-----------HPVPLLRWLLFRS--GP----LTSP---------
ACDHGG---------------FFRTAA--AP--------------------EGAKSPDLQ
-------------------M---RFLAARAVTADGMATSC-NFKQT---S------N-H-
-PDG---FSFQSV-AVRP-----------LSR-G-----------RVSLASANPSD-K--
----PIIEGNYLTDA-----QDMATLREGLR-----------------------------
---LSRKI--A--------------------------------------------KQPAF
AE-YLGHEVFPGPGFE-----TDAELDAYIAST--VHTANAIVGTCRMGQA---------
--KD-P----QA--------------VCDP-QMRVS-GVQGLRVCD----SSV----MPK
M------PG----GQTG----AATVMIAERAADMILG-----------------------
------------------------------------------------------------
------------------------------------------------------------
------------------------------------------------------------
------------------------------------------------------------
------------------------------------------------------------
------------------------------------------------------------
------------------------------------------------------------
------------------------------------------------------------
------------------------------------------------------------
------------------------------------------------------------
-------------------------------------
>51823360
------------------------------------------------------------
------------------------------------------------------------
------------------------------------------------------------
------------------------------------------------------------
------------------------------------------------------------
------------------------------------------------------------
------------------------------------------------------------
------------------------------------------------------------
------------------------------------------------------------
--------------------------IRPAT--------------VADAKA---------
---AAECEWDFIIVGGGTA------------GCVLANR----------------------
---LSA-S---------------------GEK-----RVLLLEAGSSKSLS---------
------------------------------------------SLMFRIPAGVLGLFL-SE
-HDWAFQSSGQK-----KA-ANR-EIYC-----ARGK-----------------------
-VLGGSSAIN---------------------------VLLYNRGNAADYD----------
---------LWETH--YGCAGWGAETVLPYFVKNQND-HSGL---------------AGK
NPQYHGT---GGLWSTDHVRYQNV-LSR--------------------TFLAAC-G----
----M-LGMGQ-NDDFNDWSKSQT-------------GAGR-------------------
----FLVS-QSNGARCCAATSHL---AA--ALG----------RPN-LTVLTGVYARKLN
ISN--------------------------NSCTGVQFCMG-------N------WDSTQT
FDARTA-----ADGEVVC------------TGGA-----VQTPQLLMLSGVGPKAHLAEH
GIPVVVDLPAVGENLQDQPAGVVSY----------GV-KPAYKGT----KAS--------
----------------------------RSVMKWLLARR--GV----LTST---------
GCDHGA---------------FVPIGN--E------------------------TSPSLQ
-------------------L---RFLATRAVTADGMGSFT-TFRKT---P------N-H-
-PDG---FSIQAI-AARP-----------RCR-G-----------SIKLRSAAPED-R--
----PILDYGWLNDE------DRKTLREGLR-----------------------------
---LARRI--A--------------------------------------------KTSAF
DQ-YRAEEVFPGKAIE-----TDAEIDEYLDQS--VHSANALVGTCRMGPD---------
--AH------DT--------------VVDS-ALRVH-GVAGLRIAD----ASV----FPQ
L------PG----GQSG----APTVMVAERASEFL-------------------------
------------------------------------------------------------
------------------------------------------------------------
------------------------------------------------------------
------------------------------------------------------------
------------------------------------------------------------
------------------------------------------------------------
------------------------------------------------------------
------------------------------------------------------------
------------------------------------------------------------
------------------------------------------------------------
-------------------------------------
>115692801
------------------------------------------------------------
------------------------------------------------------------
------------------------------------------------------------
------------------------------------------------------------
------------------------------------------------------------
------------------------------------------------------------
------------------------------------------------------------
------------------------------------------------------------
------------------------------------------------------------
------------------------------------------------------------
------EEWDYIILGAGAA------------GCVLANR----------------------
---LTA-D---------------------PSI-----RVLVLEAGD-DSSN---------
------------------------------------------DLKVRIPAMLIKVLR-SD
-MDWNFETEPEP-----AL-NDH-GVYL-----CRGK-----------------------
-TLGGSTCAN---------------------------VQLYHRGTEADYK----------
---------SWEQA---GAVGWGPSDVLPYFRKSESY-HGG-------------------
ADKYHGG---DGPMTVSQVPYFNP-LSA--------------------IFFEAV-G----
----E-LGHRR-NHDFNDWSAPQE-------------GFGR-------------------
----YSVT-QRNGERVSTANTYL---KQ--AQG----------RPN-LSVRTGAHVSRVL
LEGAT-----------------------DLTTTGVSYMQ-----------------RGNE
KAAKLA-----AGGEVLL------------AAGA-----VQSPQILMLSGIGPRGHLEDH
GIKVRKEVDGVGQGLQDHPAVLVSY----------ES----KRAC----SLTDH-IRL--
--------WG-TSLP-----------NPLTLLNWFVRGK--GA----LATV---------
ACEQGG---------------FFRTAA--DK-----------------------RQPDLQ
-------------------L---RFVPERSMSPDGMNSLQ-KMGGG---S------V-A-
-KSG---FTFQLL-ACRP-----------QAR-G-----------RVRLRDANPLS-K--
----PLVEGLYLSQG----TADLATLREGIK-----------------------------
---LGRRV--C--------------------------------------------QTKAF
AA-VRGAELYPGADVV-----SNEAIEQYVRTT--IHSANALTGSCRMGAA---------
--AD-P----LA--------------VLDP-QLRVR-GVCALRVID----ASA----IPQ
I------PG----GQTC----APTVMIAEKAA----------------------------
------------------------------------------------------------
------------------------------------------------------------
------------------------------------------------------------
------------------------------------------------------------
------------------------------------------------------------
------------------------------------------------------------
------------------------------------------------------------
------------------------------------------------------------
------------------------------------------------------------
------------------------------------------------------------
-------------------------------------
>64712795
------------------------------------------------------------
------------------------------------------------------------
------------------------------------------------------------
------------------------------------------------------------
------------------------------------------------------------
------------------------------------------------------------
------------------------------------------------------------
------------------------------------------------------------
------------------------------------------------------------
------------------------------------------------------------
------KQWDYIIVGGGTA------------GCVLANR----------------------
---LTS---------------------KGKNV-----RVLVLEAGS-GDYN---------
------------------------------------------HPMVRIPAGVLKLFQ-GD
-KDWNFTSVNET-----KT-SGR-GIYL-----CRGK-----------------------
-VLGGSSALN---------------------------VALYTRGDKHDYD----------
---------AWETE--FGCVGWGAKDVLPLFMRTEDD-RTGH---------------AVK
TPRHHGV---CGEWAVEHVRYQNP-LSK--------------------LFLQAC-K----
----Q-AGLPM-NDDFNDWSKKQE-------------GAGR-------------------
----FPVS-SRRGERVHAASALL---AP--ALADS--------KRQ-LQVLTGALVRKII
FEK--------------------------NVAKGVQFAA-----------------DGVV
HIARLA-----PDGEVLL------------AGGA-----VHSPQVLMLSGIGPKEQLEQN
GIKVLQDLPGVGENLQDHPAAVVSF----------EC-PKNQSGV----SVTSK-IRI--
--------PG-TTLP-----------HPAPVLEWLFKKT--GP----LCST---------
GCDHGG---------------FFRTSA--AP--------------------AGCPSPDLQ
-------------------M---RFLAARAVTADGMGSFT-KFRDM---T------N-H-
-PDG---FSFQSI-AVRP-----------QSR-G-----------RVLLASSDPDA-K--
----PLIETNYLSSE-----QDFATIREGIR-----------------------------
---LGRKL--A--------------------------------------------QQPAF
KE-FLGSEVFPGTHVQ-----SDKELDAYISDS--THTANALVGTCRMGPA---------
--GD-A----KT--------------VVDP-DMRVK-GMTGLRVCD----ASI----MPK
L------PG----GQSG----ACTVMIAEHAAEII-------------------------
------------------------------------------------------------
------------------------------------------------------------
------------------------------------------------------------
------------------------------------------------------------
------------------------------------------------------------
------------------------------------------------------------
------------------------------------------------------------
------------------------------------------------------------
------------------------------------------------------------
------------------------------------------------------------
-------------------------------------
>112919685
------------------------------------------------------------
------------------------------------------------------------
------------------------------------------------------------
------------------------------------------------------------
------------------------------------------------------------
------------------------------------------------------------
------------------------------------------------------------
------------------------------------------------------------
------------------------------------------------------------
------------------------------------------------------------
---VTSKTYDYIIAGGGLA------------GCVLADR----------------------
---LSA-D---------------------GTK-----KVLVLEAGR-SDYN---------
------------------------------------------NIKIRIPAGILRLFR-SV
-YDWQHETSGEK-----GC-NGR-NIFL-----QRGK-----------------------
-VLGGSSCTN---------------------------VQLHMRGTAQDYN----------
---------DW------NVPGWTAADVLPYFKKSEDD-KTGR------------------
SSEFHST---GGEWCMDEVRYQNP-LSK--------------------MFLKIG-E----
----E-FGLGV-NDDFNNWSRSQT-------------GVGR-------------------
----FQVS-QKNGERCSGASAFL---KQ--ALK----------RKN-LTVKAGVMVRNIN
FDG-------------------------SRTAQGVSYDLM-------G------DETMKI
FKASLN-----QGGEVIV------------CAGA-----IASPQLLMCSGIGPAEHLTSN
GIPVVSDCPGVGENLQDHPAAVVSY----------KT-S--KRGV----SVTSK-LRL--
--------LG-M--T-----------NPFPILNWGIFKR--GL----LTSV---------
GCDHGA---------------FVKTSA--S-----------------------NGQPDLQ
-------------------M---RFLPAKALTPDGMTSFT-QF-----------------
---G---YSFQSI-VARA-----------KSC-G-----------RVRLASSNIHT-K--
----PIVDGGYLSDP-----SDLATLREGIK-----------------------------
---LGRKL--G--------------------------------------------QHDSW
EA-YKGEEVYPGPGVQ-----TDEEIDEYIKNT--LHTANALTGTCKMGTG---------
--KD-------A--------------VVGP-DLRVK-GVNGVRVVD----SSI----IPT
I------TG----GQTG----TPTVMIAERASSFL-------------------------
------------------------------------------------------------
------------------------------------------------------------
------------------------------------------------------------
------------------------------------------------------------
------------------------------------------------------------
------------------------------------------------------------
------------------------------------------------------------
------------------------------------------------------------
------------------------------------------------------------
------------------------------------------------------------
-------------------------------------
>116420004
------------------------------------------------------------
------------------------------------------------------------
------------------------------------------------------------
------------------------------------------------------------
------------------------------------------------------------
------------------------------------------------------------
------------------------------------------------------------
------------------------------------------------------------
------------------------------------------------------------
-----------------------------------------------AEAK---------
---IGKNEFDYIIAGGGLA------------GCLLAER----------------------
---LTA-D---------------------GTK-----KVLMIEAGR-PDYT---------
------------------------------------------DYKIRIPAGVLSLFR-SV
-YDWQHETKGEK-----NC-NGR-NVFL-----QRGK-----------------------
-VLGGSSCTN---------------------------VCLNHRGSAQDYN----------
---------DW------GVPGWTADQVLPYFKLSGND-KTGR------------------
STEYHGK---NGEWVMEEVRYQNP-LSK--------------------KFLQVG-E----
----A-FGLGT-NDDFNNWSKPQN-------------GVGR-------------------
----FQVS-QDNGERCSGATAFL---SK--AIK----------RKN-LVVKTGAMVRRIN
FEE--------------------------QTATGITYDLM-------G------DDSNKV
FEANLK-----EGGEVLV------------TAGA-----IASPQLLMCSGIGPADHLKDN
GIKVVSDCAGVGSNLQDHPSAVVSF----------ET-P--K-------SAPLK-LRL--
--------FG-K--T-----------NPFPIMEWFMFGS--GL----ATSV---------
GCDHGA---------------FVKTSA--SN----------------------DGQPDLQ
-------------------I---RFLAARSLTPDGMTAFT-QFRNT---K------V-F-
-PDG---YSFQSV-ATRA-----------KSK-G-----------RVTLASSNMHS-K--
----PVIEGGYLSDP-----TDLATLREGVK-----------------------------
---LNRLL--G--------------------------------------------RSPEW
GP-YLGKEVYPGPNVQ-----TDEQIDEYIKNT--LHTANALTGTCKMGTG---------
--KD-------A--------------VVGS-DLRVR-GVNGVRVCD----SSV----IPN
I------PG----GQTA----TPTVMIAERAAAMI-------------------------
------------------------------------------------------------
------------------------------------------------------------
------------------------------------------------------------
------------------------------------------------------------
------------------------------------------------------------
------------------------------------------------------------
------------------------------------------------------------
------------------------------------------------------------
------------------------------------------------------------
------------------------------------------------------------
-------------------------------------
>112803968
------------------------------------------------------------
------------------------------------------------------------
------------------------------------------------------------
------------------------------------------------------------
------------------------------------------------------------
------------------------------------------------------------
------------------------------------------------------------
------------------------------------------------------------
------------------------------------------------------------
------------------------------------------------------------
------EPYDYIIAGGGLA------------GCVLAER----------------------
---LTS-D---------------------KSK-----RVLLLEAGR-PDYN---------
------------------------------------------NLFIRLPAGILKLFR-SV
-YDWQHETSGET-----EC-KGR-NVFL-----QRGK-----------------------
-VLGGSSCTN---------------------------VLLHHRGSAQDYN----------
---------DW------KVPGWSASDVLPFFKKSEND-NTGR------------------
SSDYHAK---GGEWSMDEVRYQNP-LSK--------------------RFLEVG-E----
----A-FGLGK-NDDFNNWSRPQD-------------GVGR-------------------
----FQVT-ELKGERCSGATAFL---SK--ALK----------RRN-FAIRSRVMARRIT
FDD-------------------------GKIATGVDFDLMXXXXXXXX------XXTMKT
FSARLK-----PGGEVIC------------ACGA-----IASPQLLMCSGIGPASHLEEY
GIPVVSDIPAVGKNLQDHPAAVVSF----------NT-P--RKGV----SVTSK-LRF--
--------MG-K--T-----------NPLPVLKWFFFRT--GI----MTST---------
GCDHGA---------------FVKTPA--A-----------------------DSQPDLQ
-------------------I---RFLPARAITPDGMTSFT-KFRNL---K------K-L-
-DDG---YSFQSV-AARA-----------RSC-G-----------EVRLASSNTHT-K--
----PIIHGNYLSDS-----KDLDTLREGIK-----------------------------
---LSRKL--G--------------------------------------------KREEW
KE-FLGKEVFPGNHVQ-----NDEQIDEYIRDT--LHTANALTGTCKMGTG---------
--SD-------A--------------VVGP-DLRVK-GVKGLRVID----ASV----IPI
I------PG----GQTA----TPTVMIAERASTFI-------------------------
------------------------------------------------------------
------------------------------------------------------------
------------------------------------------------------------
------------------------------------------------------------
------------------------------------------------------------
------------------------------------------------------------
------------------------------------------------------------
------------------------------------------------------------
------------------------------------------------------------
------------------------------------------------------------
-------------------------------------
>76473747
------------------------------------------------------------
------------------------------------------------------------
------------------------------------------------------------
------------------------------------------------------------
------------------------------------------------------------
------------------------------------------------------------
------------------------------------------------------------
------------------------------------------------------------
------------------------------------------------------------
--------------------------IRRAT--------------AAEAQA---------
---AAAAEWDFIIVGGGTA------------GCVLANR----------------------
---LSA-S---------------------GEK-----RVLLLEAGSAKSLA---------
------------------------------------------SLMFRIPAGVLGLFL-SE
-HDWAFQSCAQK-----QA-HNR-QIYC-----ARGK-----------------------
-VLGGSSAIN---------------------------VLLYNRGDAADYD----------
---------LWETK--YGCEGWGAKNVLPYFVKNQDD-RSGL---------------AAK
NPKYHGS---GGTWSTDQVRYQNV-LSR--------------------KFLEAC-E----
----M-LGISK-NDDFNDWSKSQT-------------GAGR-------------------
----FLVS-ERNGARCCAATAYL---AP--ALG----------RSN-LTVLSGVYARKLC
ISN--------------------------NECTGVQFCVN-------DFFGGSSSSASAT
FEARTA-----AGGEVVC------------AGGA-----MQTPQILMLSGVGPKAHLKEH
GIPLVADLPAVGENLQDQPAGVVSF----------SV-KKECKGM----SSSSH-ARL--
--------PG-TVYP-----------DPRVVLQWLTMRR--GV----LTST---------
GCDHGA---------------FVSLAN--E------------------------TSPDLQ
LR------F----------L---RFLATRAVTADGMGSFT-TFRKT---P------N-H-
-PDG---FSIQAI-AARP-----------RCR-G-----------RITLRSAAPED-RPI
LDYGPILDYGWLNDE------DRKTLREGMR-----------------------------
---LGRRL--A--------------------------------------------KSAAF
DQ-YRAEEVFPGEAVQ-----TDAELDEYLDQS--VHSANALVGTCRMGPN---------
--AR------DA--------------VVDS-KLRVH-GVKRLRIAD----ASV----FPQ
L------PG----GQSG----ASTVMVAERASEFL-------------------------
------------------------------------------------------------
------------------------------------------------------------
------------------------------------------------------------
------------------------------------------------------------
------------------------------------------------------------
------------------------------------------------------------
------------------------------------------------------------
------------------------------------------------------------
------------------------------------------------------------
------------------------------------------------------------
-------------------------------------
>56983000
------------------------------------------------------------
------------------------------------------------------------
------------------------------------------------------------
------------------------------------------------------------
------------------------------------------------------------
------------------------------------------------------------
------------------------------------------------------------
------------------------------------------------------------
------------------------------------------------------------
--------------------------IRAAT--------------AADAQA---------
---AAACEWDFIIVGGGTA------------GCVLANR----------------------
---LSA-S---------------------GEK-----RVLLLEAGGAKSLS---------
------------------------------------------SLMFRIPAGVLGLFL-SE
-HDWAFQSGAQK-----QA-QNR-QIYC-----ARGK-----------------------
-VLGGSSAIN---------------------------VLLYNRGDAADYD----------
---------LWETK--YGCAGWGAKSVLQYFVKXXXX-XXXXXX------------PGAK
SPEHHGT---GGTWTTDHVRYQNV-LSR--------------------TFLKAC-G----
----M-VGIGQ-NEDFNDWSKPQA-------------GAGR-------------------
----FLVS-ERNGARCCAATAYL---AD--ALG----------RKN-LTVLTGVYARKLL
IEN--------------------------NTCTGVQFGMG-------T------QPSSAT
FEVRTT-----SDGEVVC------------AGGA-----VQTPQLLMLSGVGPKAHLAEH
GIPLVADLPAVGENLQDQPAGVVSY----------AV-KPQYKGI----SSSSD-ARM--
--------PN-TVYP-----------NPRSVLKWLIARR--GV----LTST---------
GCDHGA---------------FIPIAN--E------------------------TSPRLQ
-------------------L---RFLATRAVTADGMGSFT-TFRKT---P------N-H-
-PDG---FSVQAI-AARP-----------QCR-G-----------SIKLRSAAPED-R--
----PLLDYDWLNPE------DRATIREGIR-----------------------------
---LGRRI--A--------------------------------------------KTAAF
EQ-YRAEEVFPGEAVE-----TDAQLDEYLDQS--VHSANALVGTCRMGPD---------
--AR------KA--------------VVDT-ALRVH-GVARLRIAD----ASV----FPQ
L------PG----GQSG----APTVMVAERASEFL-------------------------
------------------------------------------------------------
------------------------------------------------------------
------------------------------------------------------------
------------------------------------------------------------
------------------------------------------------------------
------------------------------------------------------------
------------------------------------------------------------
------------------------------------------------------------
------------------------------------------------------------
------------------------------------------------------------
-------------------------------------
>84009611
------------------------------------------------------------
------------------------------------------------------------
------------------------------------------------------------
------------------------------------------------------------
------------------------------------------------------------
------------------------------------------------------------
------------------------------------------------------------
------------------------------------------------------------
------------------------------------------------------------
------------------------------------------------------------
--------YDYIIAGGGLA------------GCLLADR----------------------
---LSA-D---------------------G-K-----KVLVLEAGT-PDYN---------
------------------------------------------AMIVRIPAGILRLFR-NT
KYDWQHETGGEK-----AC-NGR-NIFL-----QRGK-----------------------
-VLGGSSCTN---------------------------VCLHHRGSAQDYD----------
---------DW------GVTGWKASDVLPFFKASQKD-HTGR------------------
SPEFHGT---EGDWEMDDVRYQNP-LSK--------------------RFLEVG-E----
----K-AGLGT-NDDFNNWSRPQD-------------GVGR-------------------
----FQVS-EANGERCSGAYAFL---SK--AMK----------RKN-CEVRTGTMVRRIN
FDG-------------------------SKTATGVTYDLM-------G------DDTMKA
FNAKLN-----EGGEVIV------------ASGA-----VASPQLLMCSGVGPADHLADH
GIPVVHDNPSVGKNLQDHPAAVVSF----------QT-P--KKGV----SVTSK-LRL--
--------FG-M--T-----------NPVPIFQWLLRKT--GV----LTST---------
GCDHGA---------------FVRTSA--SS----------------------KGQPDLQ
-------------------I---RFLAAKALGPDGMTTFT-QFRNS---K------S-H-
-ADG---YSFQSV-ACRA-----------KSK-G-----------CIRLASSNTHV-K--
----PMIDLAYLSDA-----ADMKTLREGIK-----------------------------
---LGRQL--G--------------------------------------------NRPEW
GE-YLGEEVYPGIDVQ-----SDEEIDEYIRNT--VHTANALVGTCKMGTG---------
--KD-------A--------------VVSP-DLKVI-GVNGVRVCD----SST----IPV
I------PG----GQTA----TPTVMIAERAAA---------------------------
------------------------------------------------------------
------------------------------------------------------------
------------------------------------------------------------
------------------------------------------------------------
------------------------------------------------------------
------------------------------------------------------------
------------------------------------------------------------
------------------------------------------------------------
------------------------------------------------------------
------------------------------------------------------------
-------------------------------------
>51825974
------------------------------------------------------------
------------------------------------------------------------
------------------------------------------------------------
------------------------------------------------------------
------------------------------------------------------------
------------------------------------------------------------
------------------------------------------------------------
------------------------------------------------------------
------------------------------------------------------------
------------------------------------------------------------
------KSYDYVICGGGTA------------GSLLANR----------------------
---LTA-N---------------------GDK-----SVLVLEAGS-KKYN---------
------------------------------------------DIRIKIPAGILKTFK-SE
-FDWDYESVPTS-----HT-ADR-PIYL-----CRGK-----------------------
-VLGGSSCTN---------------------------VLLYNRGDKSDYE----------
---------AWEKA--TGDKNWGPEGVLPYFKRSEDD-HRG-------------------
GSMYHGV---GGEFSISDVNYQNP-LSR--------------------TYLSAC-D----
----E-FGVPL-NDDFNDWSRPQE-------------GAGR-------------------
----YQVS-EKNGVRCSAASAFL---EP--ALS----------RKN-LEISCSSQTSKIL
FDS-------------------------SKSAIGVEYIK-----------------NGKK
CMAKLN----ENGGEVLL------------TGGV-----VNSPQILMLSGVGPQAHLSQH
NIPLVHDSIGVGKNLQDHPACVVSY----------EC-SDGNAGV----SVTSK-IRI--
--------KG-TTIT-----------NPKVIAQWLFKKA--GP----LTST---------
GCDHGG---------------FFKTKS--TL-----------------------TSPDLQ
-------------------M---RFLPAQAITPDGMGTFT-KFRET---A------N-L-
-KDG---FSFQSI-AVRP-----------EST-G-----------ELLLRSDNIQD-K--
----PLIDVGYFRSQ-----KDIETMRDGIK-----------------------------
---LSRKI--AT-------------------------------------------TTQAF
QP-YLGREVYPGESVQ-----SDNDIDRYIRET--IHTSNALVGTCKMGAK---------
--DD-E----YA--------------VVDS-ELKVK-GVQNVRVVD----ASV----MPK
I------PG----GQTS----APTVMIGEKGADIILGR----------------------
------------------------------------------------------------
------------------------------------------------------------
------------------------------------------------------------
------------------------------------------------------------
------------------------------------------------------------
------------------------------------------------------------
------------------------------------------------------------
------------------------------------------------------------
------------------------------------------------------------
------------------------------------------------------------
-------------------------------------
>36794477
------------------------------------------------------------
------------------------------------------------------------
------------------------------------------------------------
------------------------------------------------------------
------------------------------------------------------------
------------------------------------------------------------
------------------------------------------------------------
------------------------------------------------------------
------------------------------------------------------------
------------------------------------------------------------
---VISEPYDYIIAGGGLS------------GCLLADR----------------------
---LTM-D---------------------KST-----KVLLLEAGR-SDYD---------
------------------------------------------STFIKIPMGLLRLFR-SV
-YDWQHETSGEPALNGRNI-NGR-NIFL-----QRGM-----------------------
-VLGGSSCTN---------------------------IMLSHRGSAADYD----------
---------AW------NIPGWTSVEVLPYFKYGEDF-VKGE------------------
ASEFHSK---GGEWSVSKPPYQNP-INA--------------------KLISVA-Q----
---NE-LGMSF-NDDFNDWSRPQT-------------GFGR-------------------
----FHVN-QKNGERCSGASAWL---KK--AMG----------RKN-LTVRTGVMVRKID
FDN-------------------------SKTAKGVTYDLK-------G------DDTTAT
FEAKLK-----NNGEVLV------------TGGA-----VASPQILMCSGVGPSEHLAEH
GIPVISDLPGVGQNLQDHPAVVCAY----------TI-A--KKGM----SDSSI-MRL--
-------PFG---IT-----------NPLPLLKWSLFRR--GL----LTST---------
LCEQGG---------------FLKTSN--KN-----------------------AQPDLQ
-------------------L---RFVASKAESPDGMSSVT-HFKSV---K------S-M-
-KDG---FTIQCV-AIRA-----------KSK-G-----------SVLLASSNTHV-K--
----PTIRAGYLSDP-----ADLATLREGIK-----------------------------
---IGRKI--G--------------------------------------------SSPNW
GK-FKPEEVFPGPDVR-----TDDDIDEYIRNS--LHTSNALAGTCKMGTG---------
--KD-------A--------------VVTP-DFRVK-GVSGVRVID----SSV----MPV
I------PG----GQTG----TPTVMIAERGAAVL-------------------------
------------------------------------------------------------
------------------------------------------------------------
------------------------------------------------------------
------------------------------------------------------------
------------------------------------------------------------
------------------------------------------------------------
------------------------------------------------------------
------------------------------------------------------------
------------------------------------------------------------
------------------------------------------------------------
-------------------------------------
>32276484
------------------------------------------------------------
------------------------------------------------------------
------------------------------------------------------------
------------------------------------------------------------
------------------------------------------------------------
------------------------------------------------------------
------------------------------------------------------------
------------------------------------------------------------
------------------------------------------------------------
--------------------------IRRAT--------------AADAQA---------
---AAACEWDYIIVGGGTA------------GCVLANR----------------------
---LSA-S---------------------GEK-----RVLLLEAGSAKSLS---------
------------------------------------------SLMFRIPAGVLGLFL-SE
-HDWAFQSCAQK-----QA-QNR-QIYC-----ARGK-----------------------
-VLGGSSAIN---------------------------VLLYNRGNAADYD----------
---------LWETK--YGCDGWGAKDVLKYFVKNQDD-QSGL---------------AAK
NPQHHGS---GG----DNVRYQNV-LSR--------------------TFLAAC-G----
----K-LGIGP-NDDFNDWSKPQT-------------GAGR-------------------
----FLVS-ERNGARCCAATAYL---AP--ALG----------RSN-LTVLSGVYARKLS
ISN--------------------------NACTGVQFCID----------------SSAT
FEARTA-----SDGEVVC------------AGGAMQTPQMQTPQMLMLSGIGPKAQLKEH
GIPLVADLPAVGENLQDQPAGVVSY----------AV-KPQFKGI----SSSSE-ARM--
--------PG-TVYP-----------NPRSVLKWLCARR--GV----LTST---------
GCDHGA---------------FISLAN--E------------------------TSPRLQ
-------------------L---RFLATRAVTADGMGSFT-TFRKT---P------N-H-
-PDG---FSIQSI-AARP-----------LCR-G-----------RVMLKSASPED-R--
----PILDYDWLNDE------DRATLREGMR-----------------------------
---LARRI--A--------------------------------------------KTASF
DQ-YRAEEVFPGEAIQ-----SDAELNEYLDQS--VHSANALVGTCRMGPD---------
--AR------DT--------------VVDS-RLRVH-GVARLRIAD----ASV----FPQ
L------PG----GQSG----APTVMVAERASEFL-------------------------
------------------------------------------------------------
------------------------------------------------------------
------------------------------------------------------------
------------------------------------------------------------
------------------------------------------------------------
------------------------------------------------------------
------------------------------------------------------------
------------------------------------------------------------
------------------------------------------------------------
------------------------------------------------------------
-------------------------------------
>10548836
------------------------------------------------------------
------------------------------------------------------------
------------------------------------------------------------
------------------------------------------------------------
------------------------------------------------------------
------------------------------------------------------------
------------------------------------------------------------
------------------------------------------------------------
------------------------------------------------------------
-------------------------------------------R-KLLSTA---------
---AASGEYNYILVGGGTA------------SCVLAKR----------------------
---LLDAN---------------------PDH-----KVLVLEAGS-SDYD---------
------------------------------------------DRFIRIPAGIGRLFK-SD
-KDWDFTSSSSAE-AGLGP-THS-GVYL-----CRGK-----------------------
-VLGGSSCTN---------------------------VLLYNRGSARDYD----------
---------GW------GVPGWGSEEVLEYFKKSESN-N------------------AVS
NDKFHGM---AGPYEVDSVQYTNP-LID--------------------TFLGAS-V----
----K-AGYSR-NSDFNDWDRGQE-------------GVGP-------------------
----FHVA-QRNGVRSSAASAYL---SQ--VEK----------DNR-LEVVTGAHVKKLA
IDAG------------------------KKEARGVHYAK-----------------DGME
VFTSIK-----EGGEVIL------------AAGS-----VGSPHILMLSGIGPRQHLEEH
GIDCVADLP-VGENLQDHPAAVVSY----------TV----DQKV----SVTDE-FKL--
--------FGISNIP-----------NPWPMIKYLLTGT--GP----MTSV---------
GCDYGG---------------FFKTSE--SK-----------------------EDPDLQ
-------------------M---RFIGALAQSPLGISNYK-EYARKW--L------S-W-
-PSG---FTFQNI-CVRP-----------KSK-G-----------YVRLQSANYGD-K--
----PVISTGYLSSE-----EDIESIRNGIK-----------------------------
---LSRKL--G--------------------------------------------ASEEF
KK-YNPVELYPGPEVQ-----TDEEIDEYIRNS--AHSGNALVGSCRMGVD---------
--SK------TA--------------VVDP-ELRVM-GFKSLRVID----SSV----MPV
L------PG----GQTC----SSTLMIAEKGADLL-------------------------
------------------------------------------------------------
------------------------------------------------------------
------------------------------------------------------------
------------------------------------------------------------
------------------------------------------------------------
------------------------------------------------------------
------------------------------------------------------------
------------------------------------------------------------
------------------------------------------------------------
------------------------------------------------------------
-------------------------------------
>112862145
------------------------------------------------------------
------------------------------------------------------------
------------------------------------------------------------
------------------------------------------------------------
------------------------------------------------------------
------------------------------------------------------------
------------------------------------------------------------
------------------------------------------------------------
------------------------------------------------------------
------------------------------------------------------------
--------YDYIIAGGGLA------------GCLLADR----------------------
---LSA-D---------------------G-K-----NVLVLEAGT-PDYD---------
------------------------------------------SLIVRIPAGILRLFR-NT
KWDWQHETRGEK-----AC-NGR-NVFL-----QRGK-----------------------
-GLGGSSCTN---------------------------VLLHHRGSAQDYD----------
---------DW------GIPGWKAEDVLPFFKESQKD-MTDR------------------
SPEFHGK---DGDWIMDEVRYQNP-LSK--------------------RFLEVG-A----
----K-AGLGT-NDDFNNWGRPQD-------------GVGR-------------------
----FQVS-EINGERCSGANAFL---TK--AMK----------NKN-CKVRTGTMVRRIN
FDK-------------------------SKTATGVTYDLM-------G------DDTTKA
FEAKLN-----PGGEVIV------------TSGA-----IASPQLLMCSGIGPSQHLKDL
GIPVVYDNPNVGENLQDHPAAVVSF----------KT-P--KRGV----SVTSK-LRL--
--------FG-M--T-----------NPFPVLQWLLFKT--GL----LTST---------
GCDHGA---------------FVRTSA--SV----------------------KGQPDLQ
-------------------I---RFLAARALGPDGMTTFS-QFRNS---K------H-L-
-DDG---YSFQSV-ACRA-----------KSK-G-----------CVRLSSSNTHI-K--
----PTIDGGYLSDP-----ADLKTLREGIK-----------------------------
---LGRQL--G--------------------------------------------NRPEW
GE-YLGEEIYPGLDVQ-----TDAQIDEYIKNS--IHTANALTGTCKMGTG---------
--KD-------A--------------VVSP-DLKVT-GVNGVRVAD----SST----IPI
L------PG----GQTA----TPTVMIAERAAAFL-------------------------
------------------------------------------------------------
------------------------------------------------------------
------------------------------------------------------------
------------------------------------------------------------
------------------------------------------------------------
------------------------------------------------------------
------------------------------------------------------------
------------------------------------------------------------
------------------------------------------------------------
------------------------------------------------------------
-------------------------------------
>97583906
------------------------------------------------------------
------------------------------------------------------------
------------------------------------------------------------
------------------------------------------------------------
------------------------------------------------------------
------------------------------------------------------------
------------------------------------------------------------
------------------------------------------------------------
------------------------------------------------------------
------------------------------------------------------------
---VVNDGYDYIIAGGGLA------------GCLLADR----------------------
---LSA-D---------------------GTK-----RVLVLEAGS-PDYN---------
------------------------------------------AMIIRIPAGILRLFR-NT
KYDWQHETGGEK-----AC-NGR-NVFL-----QRGK-----------------------
-VLGGSSCTN---------------------------VCLHHRGSAQDYD----------
---------DW------GVPGWKAEDVLPFFKESQKD-MTDR------------------
SPEFHGK---SGDWVMDEVRYQNP-LSK--------------------RFLEVG-A----
----K-AGLGS-NDDFNNWGRPQD-------------GVGR-------------------
----FQVS-ETNGERCSGATAFI---GK--AMK----------NKN-CSVRTGTMVRQID
FDK-------------------------SKTATGVTYDLM-------G------DDTMKA
FKAKLN-----PGGEVIV------------TSGA-----IASPQLLMCSGIGPAQHLKSH
GISVVHDNPNVGENLQDHPAAVVSF----------KT-P--KKGV----SVTSK-LRL--
--------FG-K--T-----------NPFPVLQWLLFKT--GL----LTST---------
GCDHGG---------------FVRTSA--ST----------------------DGQPDLQ
-------------------I---RFLAARALGPDGMTTFT-QFRNS---K------H-L-
-DDG---YSFQSV-ACRA-----------KSK-G-----------CVRLSSSNTHV-K--
----PTIDGGYLNDA-----NDLKTLREGIK-----------------------------
---LGRQL--G--------------------------------------------NRPEW
GE-YLGEEVYPGIDVR-----TDAQIDEYIKNS--LHTANALTGTCKMGTG---------
--KD-------A--------------VVSS-DLKVI-GVNGVRVAD----SST----IPI
I------PG----GQTA----TPTVMIAERAASLL-------------------------
------------------------------------------------------------
------------------------------------------------------------
------------------------------------------------------------
------------------------------------------------------------
------------------------------------------------------------
------------------------------------------------------------
------------------------------------------------------------
------------------------------------------------------------
------------------------------------------------------------
------------------------------------------------------------
-------------------------------------
>63121799
------------------------------------------------------------
------------------------------------------------------------
------------------------------------------------------------
------------------------------------------------------------
------------------------------------------------------------
------------------------------------------------------------
------------------------------------------------------------
------------------------------------------------------------
------------------------------------------------------------
------------------------------------------------------------
------EEWDYIILGAGAA------------GCTLANR----------------------
---LTE-D---------------------PSI-----RVLVLEAGD-DASN---------
------------------------------------------DLKVRIPAMLIKVLR-SE
-MDWNFETEPDD-----NG-TPH-GVYL-----CRGK-----------------------
-TLGGSTCAN---------------------------VQLYHRGTETDYK----------
---------SWEQA---GAVGWGPKDVLPYFRKSESY-HGG-------------------
ADKYHGA---DGPMTVGQVPYFNP-LSA--------------------IFFDAM-G----
----E-LGYRR-THDFNDWSAPQE-------------GFGR-------------------
----YSVT-QRNGERVSAASTYL---KQ--ARG----------RPN-LVVRTGAHVSRLL
LDGAA-----------------------DLAATGVSYLQ-----------------SGNE
KAAKLA-----AGGEVLL------------AAGA-----VQSPQILMLSGIGPRAHLEDH
GIQVRKEVDGVGQGLQDHPAVLVSF----------ES----KLVC----SLTDH-IRL--
--------WG-TALP-----------NPLTLLNWFVRGK--GA----LTTV---------
ACEQGG---------------FFRTTP--DK-----------------------PQPDLQ
-------------------L---RFLPERSMSPDGMNSLQ-KMGGG---G------APP-
-KSG---FTFQCL-ACRP-----------QAR-G-----------RVRLRDANPLS-K--
----PLVEGLYLSQG----GADIATLREGIK-----------------------------
---LGRRL--S--------------------------------------------QTKAF
EA-VRGKELYPGADVV-----SDEALDSYVRNT--IHSANALVGSCRMGAA---------
--AD-P----LA--------------VLDA-QLRVR-GVRALRVVD----ASA----MPR
I------PG----GQTA----APTIMIAEKAA----------------------------
------------------------------------------------------------
------------------------------------------------------------
------------------------------------------------------------
------------------------------------------------------------
------------------------------------------------------------
------------------------------------------------------------
------------------------------------------------------------
------------------------------------------------------------
------------------------------------------------------------
------------------------------------------------------------
-------------------------------------
>51902812
------------------------------------------------------------
------------------------------------------------------------
------------------------------------------------------------
------------------------------------------------------------
------------------------------------------------------------
------------------------------------------------------------
------------------------------------------------------------
------------------------------------------------------------
------------------------------------------------------------
------------------------------------------------------------
--------------------------------CVLAER----------------------
---LSA-D---------------------PAT-----RVLVLEAGQ-DPSK---------
------------------------------------------DMRVRVPAALVKVFK-SE
-LDWNFQTAPVQ-----GT--DR-GVYL-----CRGK-----------------------
-ALGGSSSTN---------------------------VMLYHRGTPADYE----------
---------KWEAK---GAKGWGPTDVLPYFRKAEDN-AEG-------------------
PSEYHGV---DGPMPVQDVPYVNP-LSR--------------------AFLAAA-G----
----Q-LGFRR-QHDFNDWSTPQE-------------GFGR-------------------
----FKVT-QNNGERCSAWNAYG---AG--ASA----------RPN-LTVRAGCHVTKIA
LDK-------------------------AVVATGVEYKQ-----------------GGEA
CTAKLA-----KGGEVLL------------CAGA-----VQSPHVLMLSGLGPKAHLEEH
GVPVRKDIPGVGVGLQDHPTALVSY----------GS----SQKV----SITDE-IRL--
--------FG-SGYP-----------NPLTTLKWLLFRR--GA----LTTV---------
ACEFGG---------------FFRTPRA-ET-----------------------AQADLQ
-------------------V---RFIAARAMNADGISTLE-KFGAG---A------R-T-
-TPG---YTAQVV-AIRP-----------KSE-G-----------RVRMQSADPFD-K--
----PVLENVHLSND-----EDVRTLREGIK-----------------------------
---LGRRL--L--------------------------------------------QAESF
DE-YRTEEVYPGAKVQ-----SDADIDAFVRSS--VHSANALTSSCRMGSE---------
--KD-P----MA--------------VLDA-ELRLR-GVGALRVID----ASV----FPQ
I------PG----GQTC----APTIMVAEKAADMLLAGK---------------------
------------------------------------------------------------
------------------------------------------------------------
------------------------------------------------------------
------------------------------------------------------------
------------------------------------------------------------
------------------------------------------------------------
------------------------------------------------------------
------------------------------------------------------------
------------------------------------------------------------
------------------------------------------------------------
-------------------------------------
>51109475
------------------------------------------------------------
------------------------------------------------------------
------------------------------------------------------------
------------------------------------------------------------
------------------------------------------------------------
------------------------------------------------------------
------------------------------------------------------------
------------------------------------------------------------
------------------------------------------------------------
------------------------------------------------------------
------QQWDYIIIGGGTA------------GCLLANR----------------------
---LTS-K-------------------KGGSK-----RVLVLEAGS-GDYN---------
------------------------------------------HPMVRIPAGVLKLFQ-GE
-KDWNFTSVNET-----KT-SGR-GIYL-----CRGK-----------------------
-VLGGSSAVN---------------------------VALYTRGDKHDYN----------
---------TWENE--FGCVGWGAKDVLPLFMRTEDD-CTGH---------------AVK
TPKHHGV---GGEWGVEHVRYQNP-LSK--------------------LFLQAC-K----
----Q-FGLPM-NDDFNDWSKGQE-------------GAGR-------------------
----FPVS-SRRGVRVHAASALL---EP--ALADG--------KRQ-LQVLTGALVRKII
LEK--------------------------NAAKGVQFAA-----------------DGVV
HIARLA-----TDGEVLL------------AGGA-----VHSPQILMLSGIGPKEQLEQN
GIEVLQDLPGVGENLQDHPAAVVSF----------EC-PKDQRGI----SVTSK-IRI--
--------PG-TTLP-----------HPAPVLEWLLQKT--GP----LCST---------
GCDHGG---------------FFRTSA--AS--------------------ADCPSPDLQ
-------------------M---RFLAARAVTADGMGSFT-KFRDM---T------D-H-
-PDG---FSFQSI-AVRP-----------KSR-G-----------RVLLASSDPDV-K--
----PLVETHYFSDE-----QDFATIREGIR-----------------------------
---LGRKL--A--------------------------------------------QQPAF
KH-VLGPEVFPGTHVQ-----SDKELDAYISDS--AHTANAIVGTCRMGPV---------
--ND-P----NT--------------VVDP-DMRVK-GITGLRVCD----ASI----MPK
I------PG----GQAG----ACTVMIAERAAEII-------------------------
------------------------------------------------------------
------------------------------------------------------------
------------------------------------------------------------
------------------------------------------------------------
------------------------------------------------------------
------------------------------------------------------------
------------------------------------------------------------
------------------------------------------------------------
------------------------------------------------------------
------------------------------------------------------------
-------------------------------------
>44409163
------------------------------------------------------------
------------------------------------------------------------
------------------------------------------------------------
------------------------------------------------------------
------------------------------------------------------------
------------------------------------------------------------
------------------------------------------------------------
------------------------------------------------------------
------------------------------------------------------------
------------------------------------------------------------
--------WDYIVVGGGTA------------GCVIANR----------------------
---LTA-----------------------TGK-----RVLVLEAGR-ADYD---------
------------------------------------------ATLVRMPAGLLRLFR-SK
-YDWDFTTSNEA-----RT-SGR-GIYL-----PRGK-----------------------
-VLGGSSALN---------------------------VLLYNRGDANDFN----------
---------LWEEK--FGCQGWKADDVLPYFKHTEDN-QTGL---------------AKS
DPKHHST---GGEWSVDHVRYQNP-LSK--------------------RFLEAC-K----
----Q-MGLPR-NDDFNSWGHKQE-------------GAGR-------------------
----FFVS-ERKGARCSAASAML---EP--ALKDK--------KRC-LKVLCGSPVQRIL
FTKD------------------------GAKATGVHFTS-----------------GGVD
HIAQLA-----TGGEVLL------------TGGA-----IHSPQLLMLSGLGPAKHLQEH
GIKVVKDLPGVGENFQDHPAAVVSY----------QC-PDAKRGV----SISSE-MRV--
--------FG---LP-----------NPIPMLKWFLLGS--GP----LTSP---------
ACDHGG---------------FFHTAA--VS-------------------AEDAKSPDLQ
-------------------M---RFLAARAITADGMSTSC-NFQKT---A------Q-H-
-PDG---FSFQAV-AVRP-----------HSR-G-----------RVRLASANPSD-K--
----PTIEGNYLTDP-----RDMATLREGLR-----------------------------
---LSRKI--A--------------------------------------------EQPAF
KE-YLGFEVFPGPQFQ-----TDTQLDTYIAST--VHTANAIVGTCRMGQA---------
--QD-P----QA--------------VCDP-KMRVH-GVAGLRVCD----SSV----MPK
M------PG----AQTG----ATTVMIAERAADMI-------------------------
------------------------------------------------------------
------------------------------------------------------------
------------------------------------------------------------
------------------------------------------------------------
------------------------------------------------------------
------------------------------------------------------------
------------------------------------------------------------
------------------------------------------------------------
------------------------------------------------------------
------------------------------------------------------------
-------------------------------------
>51851363
------------------------------------------------------------
------------------------------------------------------------
------------------------------------------------------------
------------------------------------------------------------
------------------------------------------------------------
------------------------------------------------------------
------------------------------------------------------------
------------------------------------------------------------
------------------------------------------------------------
------------------------------------------------ASA---------
---AASGEYDYILVGGGTA------------SCVLAKR----------------------
---LLEQD---------------------PNN-----KILVLEAGS-PDYG---------
------------------------------------------HKYIKIPAAVGRLFK-SD
-FDWDYTSSGSTE-GGLGA-NHE-GVYL-----CRGK-----------------------
-VLGGSSCTN---------------------------VLLYNRGSARDYD----------
---------AW------KVPGWGSQDVLDYFKRSEKN-SDFQ---------------VSG
DTKHHGK---DGPLSVSAVRYTNP-LIN--------------------TFLQAS-Y----
----K-AGYAK-NDDFNNWDRDQD-------------GVGP-------------------
----FHVA-QKDGERSSAASAYL---SS--VEA----------EAS-LSVVTGAQVQKLD
ICPE------------------------KREAGGVRYVK-----------------DGAA
VEARVR-----EGGEVIL------------AAGA-----VGSPQLLMLSGIGPKKHLKDL
GIDCIADLP-VGQNLQDHPAAVVAY----------QV----DKKV----SVTDE-FKL--
--------FG-LGLP-----------SPFPILKYFLSGT--GV----MTSV---------
GCDYGG---------------FFKTAE--TK-----------------------KDPDLQ
-------------------I---RFIGGLATSPMGISNYS-EYAKKW--L------S-W-
-PSG---YTFQNI-CVRP-----------RSK-G-----------YIRLKTSNYQD-K--
----PVISTGYLTSD-----EDVESIRNGIKVSLSPPLFAGVRHESPLTLPRSPSLRPRH
VTRLSREL--G--------------------------------------------SSEEF
KK-FNPVELFPGPAVQ-----TDEEIDAYIRNS--AHSGNALVGSCKMGTD---------
--PK------TS--------------VVDP-ELRVV-GIKSLRVID----SSV----MPV
L------PG----GQTC----SSTLMIAEK------------------------------
------------------------------------------------------------
------------------------------------------------------------
------------------------------------------------------------
------------------------------------------------------------
------------------------------------------------------------
------------------------------------------------------------
------------------------------------------------------------
------------------------------------------------------------
------------------------------------------------------------
------------------------------------------------------------
-------------------------------------
>32145454
------------------------------------------------------------
------------------------------------------------------------
------------------------------------------------------------
------------------------------------------------------------
------------------------------------------------------------
------------------------------------------------------------
------------------------------------------------------------
------------------------------------------------------------
------------------------------------------------------------
------------------------------------------VA-SDSDIA---------
---VETTEYDYIICGGGVG------------GCILANK----------------------
---LSESD---------------------PDA-----NILLLEAGK-AKQN---------
------------------------------------------SGKVKIPAKVVHTFR-SD
-IDWSYESIGTD-----HC-NGK-NIFI-----PRGK-----------------------
-SLGGSSCIN---------------------------VMLVNRGDKNDYN----------
---------EWEQQ---GAENWGADDVLPYFKNSEDY-KQEG------------------
NPAYHSK---KGLYQVTDVGYQNN-LSR--------------------LFFQAC-I----
----E-SGLKY-NGDFNDWDHDQE-------------GFGR-------------------
----FKVS-QCQGRRWTAATSHL---KA--AQS----------RQNGLRVRSSVTVNKIN
LDE-------------------------KKQATGVEIKDM----------------FGRI
KKINCK-----SNGEVLV------------CGGA-----INSPKLLQLSGIGPKAVLSKA
NVDCKVNLSGVGKNLQDHPAVVITR----------NV----KKGL----SATDD-MVWR-
-------PPIGKALP-----------KVKAITNWLVAGR--GS----LTSP---------
GCDHGA---------------FYRTDK--RM-----------------------KSPDIQ
-------------------Y---RFVAARGADPDGVVSYI-KISNE---G------A-P-
-VSG---LTLQVL-AARP-----------KSV-G-----------SVNIQSNDPDE-K--
----PAVDLGFLSNA-----ADVASLVKGVK-----------------------------
---KGREI--L--------------------------------------------ASVAF
EDVLEGDEIWPGNDLK-----SDAQIEKYVRTH--VHTANAIVGTCKIGRA---------
--SD-K----NA--------------VVDN-ELRVY-GTSNLRVVD----ASV----MPK
L------PG----GQTA----ASTVMIAERAAEMI-------------------------
------------------------------------------------------------
------------------------------------------------------------
------------------------------------------------------------
------------------------------------------------------------
------------------------------------------------------------
------------------------------------------------------------
------------------------------------------------------------
------------------------------------------------------------
------------------------------------------------------------
------------------------------------------------------------
-------------------------------------
>63419576
------------------------------------------------------------
------------------------------------------------------------
------------------------------------------------------------
------------------------------------------------------------
------------------------------------------------------------
------------------------------------------------------------
------------------------------------------------------------
------------------------------------------------------------
------------------------------------------------------------
---------------------LRSVL-------------LDGSR-PGAADK---------
---VASEQWDYIIAGGGTA------------GCVLANR----------------------
---LMR-----------------------AGK-----RVLVLEAGS-ADYE---------
------------------------------------------NRLIRIPVGVLYLFA-SK
-FDWTFFTKDLP------------KVFL-----CRGR-----------------------
-VLGGSSALN---------------------------VMLYHRGDAKDYN----------
---------LWETE--FGCKGWAAEQVLPYFKCTEDG-RAGL---------------AQK
DPKHHGV---GGEWKVDHVSYQNE-LSA--------------------TFLDAC-K----
----E-AGLPA-NDDFNNWDRPQE-------------GAGR-------------------
----FHVS-QKDGSRCSAASALL---AP--ALRESSSSA----SKP-LRVLCNAHTSKVT
FQG--------------------------KAATGVSFRTA----------------AGEQ
REARLA-----PGGEVIV------------AGGA-----LHSPQILMLSGIGPRNHLKEK
GIDVIADLPGVGENFQDHPAANVSY----------EV-PPARRGI----SPTSKCIYV--
--------FG-KRIP-----------SPLWGVQWLLFGS--GP----LTSP---------
GCDHGC---------------FFKTSV--AA---------------------KEASPDVQ
-------------------M---RFLPARAVTADGMNSFT-TFRNLK--K------S-Q-
-PDG---FSFQSV-AIRP-----------HSR-G-----------CVRLASADPSE-L--
----PVVEGGYLSNP-----KDLESLREGMR-----------------------------
---FSRRL--A--------------------------------------------KQPVF
AG-YLGPEVFPGEEVQ-----TDEQLNSYIRTN--VHTANAIVGTCRMGAA---------
--ED-K----MA--------------VCDP-EMKVLGGLTNLRICD----ASV----MPK
M------PG----GQTG----APVVMIAERLAAILTG-----------------------
------------------------------------------------------------
------------------------------------------------------------
------------------------------------------------------------
------------------------------------------------------------
------------------------------------------------------------
------------------------------------------------------------
------------------------------------------------------------
------------------------------------------------------------
------------------------------------------------------------
------------------------------------------------------------
-------------------------------------
>24741924
------------------------------------------------------------
------------------------------------------------------------
------------------------------------------------------------
------------------------------------------------------------
------------------------------------------------------------
------------------------------------------------------------
------------------------------------------------------------
------------------------------------------------------------
------------------------------------------------------------
------------------------------------------------------------
----------------GTA------------GCVLADR----------------------
---LSA-G---------------------GAK-----RVLVLEAGP-DETG---------
------------------------------------------HPHIRIPAGILRLFK-SR
-FDWDYNSRGEA-----GLKAGK-SVYL-----CRGK-----------------------
-VLGGSSCAN---------------------------VMLYNRGAAEDYE----------
---------GW------GLDGWGAAECLKYFRKSEGF-HKG-------------------
ASEFHGG---DGPFKVSDVPYQNV-LSK--------------------AFLDAC-Q----
----A-MGLAR-NDDFNDWKRAQE-------------GFGR-------------------
----FQVS-QSRGERCSAASSYM---AN--AAK----------REN-LHVETEATITRLN
VDG--------------------------GDVRGVVYVDR----------------HGAE
QYAALA-----AGGEAVL------------TAGA-----IGSPQLLMLSGIGAPDHLRDV
GVRPVVDLPAVGRNLQDQPAAVVSY----------QI----DRPV----SVTDD-IRL--
--------GG---WP-----------NPMSFLRWYLFRS--GP----LTSP---------
GCDHGG---------------FFSTTG--RA-----------------------ALPDLQ
-------------------I---RFIAAQASSPDGVSTYK-NFGRGWGGA------K-F-
-RSG---FSFQPI-CVRP-----------KSR-G-----------KLELTGGTIHD-K--
----PAITTGYLAED-----SDARTIVEGIK-----------------------------
---LSREI--A--------------------------------------------RQGPL
AG-YVEDEVFPGAGVE-----KDDDLLEYIKAN--AHSANAITGTCRMGVG---------
--RD------SA--------------VVDT-SLNVF-GVGNLRIAD----ASV----MPT
I------PG----GQTA----ASTVMIAEKAADMILAK----------------------
------------------------------------------------------------
------------------------------------------------------------
------------------------------------------------------------
------------------------------------------------------------
------------------------------------------------------------
------------------------------------------------------------
------------------------------------------------------------
------------------------------------------------------------
------------------------------------------------------------
------------------------------------------------------------
-------------------------------------
>56345353
------------------------------------------------------------
------------------------------------------------------------
------------------------------------------------------------
------------------------------------------------------------
------------------------------------------------------------
------------------------------------------------------------
------------------------------------------------------------
------------------------------------------------------------
------------------------------------------------------------
------------------------------------------------------------
---VVRRTWDYIVVGGGTA------------GCVIANR----------------------
---LTA-----------------------AGK-----KVLILEAGR-ADYD---------
------------------------------------------ATLVRMPAGLLRLFK-SK
-YDWDFTSSNEA-----KT-SGR-GIYL-----PRGK-----------------------
-VLGGSSALN---------------------------VLLYNRGDANDFN----------
---------LWEEK--FGCQGWKADDVLPYFKRTEDN-QTGL---------------AKS
DPKHHST---GGEWSVDHVRYQNP-LSK--------------------RFLEAC-K----
----Q-MGLPR-NDDFNSWGRKQE-------------GAGR-------------------
----FFVS-ERKGSRCSAASAML---EP--ALKDE--------KRC-IKVLCGSPVQRIL
FTED------------------------GVKAAGVHFTN-----------------GGTD
HIAHLA-----PGGEVLL------------TGGA-----IHSPQLLMLSGLGPAKHLQEH
GIKIVKDLPGVGENFQDHPAAVVSY----------QC-PDAKRGV----SITSK-MRI--
--------FG---LP-----------NPIPMLRWFIFGS--GP----LTSP---------
ACDHGG---------------FFHTAA--VS-------------------KVDAKSPDLQ
-------------------M---RFLAARAVTADGMSTFC-KFQNT---L------N-H-
-PDG---FSFQSV-AVRP-----------HSR-G-----------RVCLASANPSD-K--
----PIIEGNYLTDA-----RDMATLREGLR-----------------------------
---LSRKI--A--------------------------------------------KQPAF
AD-YLGFEIFPGPQFQ-----TDAELDTYIAST--VHTANAIVGTCRMGQA---------
--KD-T----QA--------------VCDP-QMRVH-GMVGLRVCD----SSV----MPK
M------PG----AQTG----ATTVMIAERAAEMI-------------------------
------------------------------------------------------------
------------------------------------------------------------
------------------------------------------------------------
------------------------------------------------------------
------------------------------------------------------------
------------------------------------------------------------
------------------------------------------------------------
------------------------------------------------------------
------------------------------------------------------------
------------------------------------------------------------
-------------------------------------
>51695920
------------------------------------------------------------
------------------------------------------------------------
------------------------------------------------------------
------------------------------------------------------------
------------------------------------------------------------
------------------------------------------------------------
------------------------------------------------------------
------------------------------------------------------------
------------------------------------------------------------
------------------------------------------------------------
---VSGQTWDYIIVGGGAA------------GCALANR----------------------
---LTA-----------------------AEK-----KVLVLEAGG-RITKR--------
----------------------------------XXXXXXXXXXEMKIPAGVLKLFQ-SE
-YDWHFQTSNEA-----AI-NNR-SVYL-----CRGK-----------------------
-VLGGSSVTN---------------------------VLLYNRGDANDYN----------
---------VWDTE--FGCKGWKADEVLPDFIRHEND-RTG-----------------ST
STKHHGT---SGELCVEHVRYQNP-MSR--------------------AFLEAC-E----
----Q-AGLPS-NPDFNDWSRKQE-------------GAGR-------------------
----FSVM-TNKGERCDCASAFM---KP--ALDDK--------RRK-LEVLTGAAVRKVN
INE-------------------------NGAATGVKFALV----------------DGNT
HTVNLA-----QGGEVLL------------AGGA-----IHSPQLLMLSGVGPRDHLEKM
GIDVVSDIPAVGSNLQDHPAAVLSY----------QC-PDSQKGV----SMSSK-LRI--
--------PG-TTKP-----------NPLRVFQWLFTGT--GP----MASV---------
GCDHGG---------------FFRTPA--AA----------------------SSSADLQ
-------------------M---RFLATRSVTADGMQSVT-EFRDR---T------S-H-
-PDG---FSFQCL-AARP-----------HSS-G-----------RVLLSSPDPDD-K--
----PIIQGNYLKDS-----RDVATIREGLK-----------------------------
---LGRKL--A--------------------------------------------HQQAF
SK-YIGEEVFPGREVQ-----SDADLDNFIKST--VHTGNALVGTCRMGQP---------
--ND-P----LA--------------VVDT-ELKVK-GVSGLRVID----SSV----MPK
L------PG----GQIV----ASTLMVVERGADMLLRK----------------------
------------------------------------------------------------
------------------------------------------------------------
------------------------------------------------------------
------------------------------------------------------------
------------------------------------------------------------
------------------------------------------------------------
------------------------------------------------------------
------------------------------------------------------------
------------------------------------------------------------
------------------------------------------------------------
-------------------------------------
>112729465
------------------------------------------------------------
------------------------------------------------------------
------------------------------------------------------------
------------------------------------------------------------
------------------------------------------------------------
------------------------------------------------------------
------------------------------------------------------------
------------------------------------------------------------
------------------------------------------------------------
------------------------------------------------------------
------EEWDYIILGAGAA------------GCVLANR----------------------
---LTA-D---------------------PSV-----RVLVLEAGD-DASS---------
------------------------------------------DLKVRIPAMLIKVLR-SD
-MDWNFETEPDT-----AL-NDH-PVYL-----CRGK-----------------------
-TLGGSTCAN---------------------------VQLYHRGTETDYK----------
---------SWEQA---GAVGWGPSDVLPYFRKSESY-HGG-------------------
SDKYHGG---DGPMTVSQVPYFNP-LSA--------------------VFFEAV-G----
----E-LGHRH-NHDFNDWSAPQE-------------GFGR-------------------
----YSVT-QRNGERISTANTYL---KQ--AQG----------RPN-LSVRTGAHVSRLL
LEGAN-----------------------DLTTTGVSYMQ-----------------RGNE
KAAKLA-----AGGEVLL------------AAGA-----VQSPQILMLSGIGPRAHLEDH
GIKVRKEVDGVGQGLQDHPAVLVSY----------ES----KRAC----SLTDH-IRL--
--------WG-TALP-----------NPLTLLNWFVRGK--GA----LATV---------
ACEQGG---------------FFRTTP--DK-----------------------AQPDLQ
-------------------L---RFVPERSMSPDGMNSLQ-KMGSG---A------I-A-
-KSG---FTFQLL-ACRP-----------QAR-G-----------RVRLRDANPLS-K--
----PLVEGLYLSQG----SSDLATLREGIK-----------------------------
---LGRRV--S--------------------------------------------QTKAF
EG-VRGEELYPGADVV-----SDEAIESYVRNT--IHSANALVGSCRMGAA---------
--AD-P----LAVLDPQLRVRGVRALVLDP-QLRVR-GVRALRVVD----ASA----MPR
I------VG----GQTC----APTIMIAEKAA----------------------------
------------------------------------------------------------
------------------------------------------------------------
------------------------------------------------------------
------------------------------------------------------------
------------------------------------------------------------
------------------------------------------------------------
------------------------------------------------------------
------------------------------------------------------------
------------------------------------------------------------
------------------------------------------------------------
-------------------------------------
>116705161
------------------------------------------------------------
------------------------------------------------------------
------------------------------------------------------------
------------------------------------------------------------
------------------------------------------------------------
------------------------------------------------------------
------------------------------------------------------------
------------------------------------------------------------
------------------------------------------------------------
------------------------------------------------------------
------EEWDYIILGAGAA------------GCVLANR----------------------
---LTD-D---------------------PSV-----RVLVLEAGD-DASS---------
------------------------------------------DLKVRIPAMLIKVLR-SD
-MDWNFETEPDA-----AG-TSH-GVYL-----CRGK-----------------------
-TLGGSTCAN---------------------------VQLYHRGTETDYK----------
---------SWEQA---GAVGWGPSDVLPYFRKSESY-HGG-------------------
SDKYHGG---DGPMTVSQVPYFNP-LSA--------------------VFFEAV-G----
----E-LGHRH-NHDFNDWSAPQE-------------GFGR-------------------
----YSVT-QRNGERISTANTYL---KQ--AQG----------RPN-LSVRTGAHVSRLL
LEGAN-----------------------DLTTTGVSYMQ-----------------RGNE
KAAKLA-----AGGEVLL------------AAGA-----VQSPQILMLSGIGPRAHLEDH
GIKVRKEVDGVGQGLQDHPAVLVSF----------ES----KLAC----SLTDH-IRL--
--------WG-TALP-----------NPLTLLNWFVRGK--GA----LTTV---------
ACEQGG---------------FFRTTP--DK-----------------------PQPDLQ
-------------------M---RFLPERSMSPDGMNSLQ-KMGSG---A------I-A-
-KSG---FTFQCL-ACRP-----------QAR-G-----------RVRLRDANPLS-K--
----PLVEGLYLSQG----SSDLATLREGIK-----------------------------
---LGRRV--C--------------------------------------------QTKAF
EG-VRGEELYPGADVV-----SDEAIESYVRNT--IHSANALVGSCRMGAA---------
--AD-P----LA--------------VLDP-QLRVR-GVRALRVVD----ASA----MPR
I------VG----GQTC----APTIMIAEKAADEILNGR---------------------
------------------------------------------------------------
------------------------------------------------------------
------------------------------------------------------------
------------------------------------------------------------
------------------------------------------------------------
------------------------------------------------------------
------------------------------------------------------------
------------------------------------------------------------
------------------------------------------------------------
------------------------------------------------------------
-------------------------------------
>116110556
------------------------------------------------------------
------------------------------------------------------------
------------------------------------------------------------
------------------------------------------------------------
------------------------------------------------------------
------------------------------------------------------------
------------------------------------------------------------
------------------------------------------------------------
------------------------------------------------------------
------------------------------------------------------------
------------------------------------------------------------
------------------------------------------------------------
------------------------------------------------------------
------------------------------------------------------------
------------------------------------------------------------
------------------------------------------------------------
------------------------------------------------------------
------------------------------------------------------------
------------------------------------------------------------
------------------------------------------------------------
--------------EILI------------TSGA-----IASPQLLMVSGIGPADHLKEN
GIKVVADLPGVGENLQDHPSAVVSF----------KT-P--KKGI----SVTSK-LRI--
--------PG-TTIT-----------NPLHAFRWLFFGT--GI----LTSV---------
GCDHGA---------------FTKTSA--AD-----------------------GQSDLQ
-------------------V---RFLPAKALSPDGMTTFS-LFRTT---P------N-L-
-EDG---YSFQSV-AVRA-----------RSR-G-----------QVRLASSNTHV-K--
----PSINAGYLADA-----ADMTTLREGIK-----------------------------
---LGRKL--G--------------------------------------------NRDEW
GN-LKGEEVYPGTEVQ-----TDDEIDEYIRNT--VHTANAIVGTCKMG-----------
--ND-A----AS--------------VVGP-DLKVH-GVDGVRVID----SSI----IPR
I------MG----GQTG----TPVVMIAERAAKNIRKAHAAEEKVSGEEYDYIIAG----
GGLAGTVLAERLTADGTKNV------------LMLEAGSADYKNKFINIPAGILR-----
----------LFKSSFDWDYETKGEKACNGRNVYFARGKVLGGSSC--------------
-------------------LNVL--------------------LHHRGTNKDYD------
--------------------------------DW------G-------------------
-----------------VPGWGS--ADVLE-------------------YFK-------M
SHDD---LT---------------------------------------------------
---------------------NRDPAYHGKGGE--------------------WTMDEVK
YQNPLSKKFLVVGADAGLGTNDDFNNWGREQDGVGSFQVS--------------------
--AKKGAR--------------VSGASAF-----------------ISKAIKRKN---LS
VSTGTMVH------------RINF------------------------------------
---------------------------------DAFM
>101194047
------------------------------------------------------------
------------------------------------------------------------
------------------------------------------------------------
------------------------------------------------------------
------------------------------------------------------------
------------------------------------------------------------
------------------------------------------------------------
------------------------------------------------------------
------------------------------------------------------------
------------------------------------------------------------
------------------------------------------------------------
------------------------------------------------------------
---------------------------------------------IRIPAGLVKVFK-TK
-HDWDFETKPDP-----DT-ADR-GVYL-----CRGK-----------------------
-VLGGSSSTN---------------------------VMLYHRGTPADYE----------
---------SWVAR---GAVGWGPGDVLDYYKKAERA-SNG-------------------
QSKYHGA---GGPLHVQDVPYVNP-LST--------------------AFVAAA-G----
----E-LGYRH-NSDFNDWSAPQE-------------GFGR-------------------
----FKVT-QRSGERCSAANAYL---PDE-VAR----------RAN-LCVRMGTTVTRVA
LDGNGD--------------------AEPLAAGGIEYVD----------------AEGRL
MTARLA-----SGGEVLV------------CAGA-----VQSPQLLMLSGIGPREHLEEV
GIEVRHDSKGVGEGLQDHPAVIVSY----------EC----PQAV----SLSDE-IRV--
--------PG-TSIT-----------NPITLAKWMLFKK--GA----LTSV---------
ACEFGG---------------FFKTSE--QR-----------------------EQPDVQ
-------------------V---RFIAARALSPDGISTLK-KFGSG---E------V-L-
-KSG---FTTQIV-ACRP-----------RSE-G-----------RVRLRSADPRA-K--
----PQVEGIYLSSR---DGADIATLREGIR-----------------------------
---LGRKI--A--------------------------------------------AASSF
DA-YRGAEVYPSTAVS-----SDEEIDSYIRSS--VHSANALTSSCRMGAD---------
--GD-P----AA--------------VLDP-ELRVR-GVGALRVVD----ASA----MPH
I------IG----GQTC----APVIMLAEKAADMV-------------------------
------------------------------------------------------------
------------------------------------------------------------
------------------------------------------------------------
------------------------------------------------------------
------------------------------------------------------------
------------------------------------------------------------
------------------------------------------------------------
------------------------------------------------------------
------------------------------------------------------------
------------------------------------------------------------
-------------------------------------
>4528847
------------------------------------------------------------
------------------------------------------------------------
------------------------------------------------------------
------------------------------------------------------------
------------------------------------------------------------
------------------------------------------------------------
------------------------------------------------------------
------------------------------------------------------------
------------------------------------------------------------
-----------------------------------------------SAAE---------
---VSRETWDYIIVGGGTA------------GCVLANR----------------------
---LTG-A-------------------RGKGK-----RVLVLEAGR-SDYD---------
------------------------------------------ATMVKIPAGVLKLFK-SK
-YDWDFTTSNEK-----CT-AGR-GIYL-----PRGK-----------------------
-VLGGSSALN---------------------------VCLYNRGDDNDYN----------
---------TWESK--FGCVGWSAKDVLPLFKKTQDD-LTGL---------------AKE
DPQHHST---GGEWATEHVRYQNP-LSK--------------------RFLEAC-K----
----E-MGFPL-VKDFNCWGRGQE-------------GAGR-------------------
----FAVS-ERKGVRCCAASSML---KP--ALADQ--------ARN-LKVLTGAPVERII
FADEKS--------------------KAAPEATGVLFSV-----------------AGVQ
HVARLA-----PEGEVLL------------TGGA-----IHSPQLLMISGIGPAKHLAEH
GIDVVSDLAGVGENLQDHPAAVASF----------EC-PADQKGI----SVTSL-IKI--
--------QG-TNLP-----------HPKPLLQWLLTGT--GP----LTST---------
GCDHGG---------------FFRTAA--AP--------------------KDSESPDLQ
-------------------M---RFLAARAITADGMGTFT-AFKKT---T------T-L-
-PDG---FSFQSI-AVRP-----------LSR-G-----------RVLLKSGDPND-K--
----PIIEGNYLSDK-----ADVSTIREGLK-----------------------------
---LARMM--A--------------------------------------------KQPAF
KG-VVGSEIFPGPHVQ-----TDAQLDAYIADT--VHTGNALVGTCRMGPA---------
--ID-P----FA--------------VCDP-EMRVK-GVYRLRVCD----ASI----MPK
M------PG----AQSG----ACVVMQAERAADLL-------------------------
------------------------------------------------------------
------------------------------------------------------------
------------------------------------------------------------
------------------------------------------------------------
------------------------------------------------------------
------------------------------------------------------------
------------------------------------------------------------
------------------------------------------------------------
------------------------------------------------------------
------------------------------------------------------------
-------------------------------------
>109822014
------------------------------------------------------------
------------------------------------------------------------
------------------------------------------------------------
------------------------------------------------------------
------------------------------------------------------------
------------------------------------------------------------
------------------------------------------------------------
------------------------------------------------------------
------------------------------------------------------------
------------------------------------------------------------
------EEWDYIILGAGAA------------GCVLANR----------------------
---LTE-D---------------------PSV-----RVLVLEAGE-DASS---------
------------------------------------------DLKVRIPAMLIKVLR-SD
-MDWNFETEPDA-----AG-TSH-GVYL-----CRGK-----------------------
-TLGGSTCAN---------------------------VQLYHRGTETDYK----------
---------SWEQA---GAAGWGPNDVLPYFRKSECY-FGG-------------------
ADKYHGA---DGPMTVSQVPYFNP-LSA--------------------IFFEAV-G----
----E-LGHRR-NHDFNDWSAPQE-------------GFGR-------------------
----YSVT-QRNGERISTANTYL---KQ--ARG----------RPN-LDVRTGAHVSRLL
LEGAT-----------------------DLATTGVSYMQ-----------------SGNE
KAAKLA-----AGGEVLL------------AAGA-----VQSPQILMLSGIGPRAHLEDH
GIKVRKEVDGVGQGLQDHPAVLVSF----------ES----KLAC----SLTDH-IRL--
--------WG-TALP-----------NPLTLLNWFVRGK--GA----LTTV---------
ACEQGG---------------FFRTTP--DK-----------------------PQSDLQ
-------------------M---RFLPERSMSPDGMNSLQ-KMGSG---A------I-A-
-KSG---FTFQCL-ACRP-----------QAR-------------RVRLRDANPLS-K--
----PLVEGLYLSQG----SSDLATLREGIK-----------------------------
---LGRRV--S--------------------------------------------QTKAF
EG-VRGEELYPGADVV-----SDEAIENYVRNT--IHSANALVGSCRMGAA---------
--AD-P----LA--------------VLDP-QLRVR-GVRALRVVD----ASA----MPR
I------VG----GQTC----APTIMIAEKAA----------------------------
------------------------------------------------------------
------------------------------------------------------------
------------------------------------------------------------
------------------------------------------------------------
------------------------------------------------------------
------------------------------------------------------------
------------------------------------------------------------
------------------------------------------------------------
------------------------------------------------------------
------------------------------------------------------------
-------------------------------------
>44417207
------------------------------------------------------------
------------------------------------------------------------
------------------------------------------------------------
------------------------------------------------------------
------------------------------------------------------------
------------------------------------------------------------
------------------------------------------------------------
------------------------------------------------------------
------------------------------------------------------------
------------------------------------------------------------
------------------------------------------------------------
-----A-D---------------------SAN-----RVLLIEAGE-DAKG---------
------------------------------------------DMRVKVPAAAVKLFK-SE
-RDWDFETPTDA-----RL-NGN-SVYL-----CRGK-----------------------
-ALGGSSCTN---------------------------VMLYHRGTAADYD----------
---------SWEAT---GARGWGPNDVLPYYLKCEDY-QEG-------------------
ASKYHGV---GGPIAVQEVPYQNP-LSR--------------------AFLKAA-G----
----A-LGYRK-TEDFNDWSAPQDGFGXXXXXXXXXXGFGR-------------------
----YKVT-QRNGVRCSAASAYL---EG--IKG----------RAN-LHIRTGAHITRLA
LDGVGD----------------------SLSISGVEYVCG---------------PDDSA
RSVQLA-----SGGEAIV------------CAGA-----VQTPQLLMLSGIGPREHLEEI
GITVRKDLPGVGEGLQDHPAVLVSF----------EG----TKRI----SVTDK-IGI--
--------FG-TRIP-----------NPAALAQWVFRGR--GP----LTSV---------
ACDHGG---------------FFRTSD--EK-----------------------PQADLQ
-------------------M---RFVAARAMSNSGMSTLT-KMGAG---T------R-M-
-QPG---FTAQLL-ACRP-----------KSH-G-----------RVRLQSDDPFA-K--
----PLLQDLYLSAP---GDDDIVTLREGIK-----------------------------
---LARNL--L--------------------------------------------RSREF
DE-YRGHEAFPGEEVR-----SDEQIEQYIRDS--VHSANALTSSCRMGAA---------
--DD-P----LA--------------VLDS-QLRVR-GVGALRVVD----ASA----MPQ
I------IG----GQTC----APTMMIAEKAADLILG-----------------------
------------------------------------------------------------
------------------------------------------------------------
------------------------------------------------------------
------------------------------------------------------------
------------------------------------------------------------
------------------------------------------------------------
------------------------------------------------------------
------------------------------------------------------------
------------------------------------------------------------
------------------------------------------------------------
-------------------------------------
>97429747
------------------------------------------------------------
------------------------------------------------------------
------------------------------------------------------------
------------------------------------------------------------
------------------------------------------------------------
------------------------------------------------------------
------------------------------------------------------------
------------------------------------------------------------
------------------------------------------------------------
------------------------------------------------------------
------EAWDYIIVGGGTA------------GCVLANR----------------------
---LSA-----------------------ADK-----KVLVIEAGR-SDYD---------
------------------------------------------HMLVKIPAGVLRTFK-SV
-YDWDFTSQNEK-----AT-SGR-GIYL-----PRGK-----------------------
-VLGGSSCLN---------------------------VCLYQRGDANDYN----------
---------LWETE--FGCDGWAACDVLPHFKRSEND-QTGL---------------AKT
DPKHHST---GGEWSVDNVRYQNP-LSK--------------------TFLSAC-K----
----E-AGLPD-NSDFNSWGHKQE-------------GAGR-------------------
----FCVS-QKGGSRCSAATAML---EP--ALAKG--------DRK-LKVLSGAPCRKIV
FGE-------------------------GNVVKGVLFKA-----------------GGAE
HVARIA-----PKGEVIL------------AGGA-----IHSPQILMLSGIGPKKHLQDN
NISVLVDSPGVGANLQDHPAAVVSF----------EC-PQSCTGV----SVTSK-LRI--
--------AG-SSLP-----------NPRPLLQWLFTGS--GP----LTST---------
GCDHGG---------------YFRTSA--AG--------------------KDNNSTDLQ
-------------------M---RFLAARAVTADGMGSFT-SFKNS---S------N-H-
-KDG---FTFQAI-AARP-----------RSR-G-----------TVSLKSSNPDD-K--
----PIIQLNYLTDK-----QDVATIREGIR-----------------------------
---LGRKI--A--------------------------------------------QQNSF
KE-FVGEEVFPGKNVQ-----SDADLDAYISDT--VHTANALVGTCRMGKA---------
--DD-P----DA--------------VCDP-EMRVK-GCSGLRVCD----ASL----MPK
I------TG----GQTG----ACVVMMAERAADMVLGK----------------------
------------------------------------------------------------
------------------------------------------------------------
------------------------------------------------------------
------------------------------------------------------------
------------------------------------------------------------
------------------------------------------------------------
------------------------------------------------------------
------------------------------------------------------------
------------------------------------------------------------
------------------------------------------------------------
-------------------------------------
>65816494
------------------------------------------------------------
------------------------------------------------------------
------------------------------------------------------------
------------------------------------------------------------
------------------------------------------------------------
------------------------------------------------------------
------------------------------------------------------------
------------------------------------------------------------
------------------------------------------------------------
---------------------------RRAT--------------AADAKK---------
---VAECKWDYIILGGGTA------------GCVLANR----------------------
---LSA-S---------------------GEK-----KVLVLEAGT-GNFA---------
------------------------------------------SLPFRVPAGVLKLFL-SE
-HDWAFTTKPQP-----NA-ADR-EIYF-----CRGK-----------------------
-VLGGSSAMN---------------------------VLLYNRGDREDYEWEKLGCVVLL
YNRGDREDYEWEKL---GCVGWTADAALDSFRKSQDD-RSGC---------------VEK
APKFHGK---GGEWKTDHVRYQNV-LSR--------------------TFLAAC-A----
----A-VGFKA-NPDFNDWSRDQT-------------GFGR-------------------
----FTVS-QRDGERCCAGSAYL---AP--VED----------RAN-LTVLTGAYVRRLL
MEG--------------------------TKCTGAEFSL-----------------GGET
FAVKAT-----AAGEVIC------------AGGA-----VQTPQLLMLSGIGPKDHLQSL
GIKTVVDSPVVGENLQDHPSAVVSY----------QC-CPEKAGV----SVSSR-LRI--
--------PG-TIIT-----------HPWPVLKWLFTRK--GE----LTST---------
GCDHGG---------------FFRTNK--D------------------------ASPDLQ
-------------------M---RFLAARAVTADGMGSFT-TFRKT---P------N-H-
-PDG---FSFQAV-AVRP-----------ASR-G-----------RVRLRSAVPED-R--
----PTIDAGWL-DP-----KDLATLRDGLK-----------------------------
---LGRRI--A--------------------------------------------AAKDF
DD-FRGKEVFPGPDVK-----TDAQLDEYIASS--CHTANAIVGTCRMGED---------
--KK------TN--------------VVDS-RLQVH-GCSNLRVVD----ASV----VPR
I------PG----GQTG----PVTVMIAERAALMITGK----------------------
------------------------------------------------------------
------------------------------------------------------------
------------------------------------------------------------
------------------------------------------------------------
------------------------------------------------------------
------------------------------------------------------------
------------------------------------------------------------
------------------------------------------------------------
------------------------------------------------------------
------------------------------------------------------------
-------------------------------------
>34828956
------------------------------------------------------------
------------------------------------------------------------
------------------------------------------------------------
------------------------------------------------------------
------------------------------------------------------------
------------------------------------------------------------
------------------------------------------------------------
------------------------------------------------------------
------------------------------------------------------------
------------------------------------------------------------
--------WNYIIVGGGAA------------GCVLAER----------------------
---LSA-D---------------------PAA-----RILVLEAGQ-DPSK---------
------------------------------------------DMRVRVPAALVKVFK-SE
-LDWNFETASVP-----GT--KR-GVYL-----CRGK-----------------------
-ALGGSSSTN---------------------------VMLYHRGTPADYA----------
---------SWEAK---GAQGWGAADVLPYFRKAEDH-AEG-------------------
ASEYHGV---DGPMPVQDVPYVNP-LSR--------------------AFLAAA-G----
----E-LGFRR-QHDFNDWSTPQE-------------GFGR-------------------
----FKVT-QNNGERCSAWNAYG---AGA-A-----------------------------
-------------------------------AARVEYVQ-----------------GGEK
CTAKLA-----KGGEVLL------------CAGA-----VQSPHVLMLSGLGPRKELEAH
KIPVRKDIPGVGVGLQDHPAALVSY----------GS----SQPV----SITDE-IRL--
--------FG-SKYP-----------NPLTTLKWLLFRR--GA----LTTV---------
ACEFGG---------------FFRSPRAKSA-----------------------DQTDIQ
-------------------V---RFIAAKAMNPDGISTLE-KFGAG---A------R-T-
-TPG---FTAQVV-AIRP-----------KSE-G-----------RVRLQSADPFD-K--
----PVLENVHLSSE-----EDVRTLREGIK-----------------------------
---LGRRL--L--------------------------------------------QDSSF
DE-YRTEEVYPGAKVQ-----SDADIDAFIRGS--VHSANALTSSCRMGSE---------
--KD-P----NA--------------VLDA-ELRVR-GVGALRVID----ASA----FPQ
I------PG----GQTC----APTIMVAEKAADLLLG-----------------------
------------------------------------------------------------
------------------------------------------------------------
------------------------------------------------------------
------------------------------------------------------------
------------------------------------------------------------
------------------------------------------------------------
------------------------------------------------------------
------------------------------------------------------------
------------------------------------------------------------
------------------------------------------------------------
-------------------------------------
>25377605
------------------------------------------------------------
------------------------------------------------------------
------------------------------------------------------------
------------------------------------------------------------
------------------------------------------------------------
------------------------------------------------------------
------------------------------------------------------------
------------------------------------------------------------
------------------------------------------------------------
-----------------------------------------------AAAA---------
---AAAEAWDYIIVGGGTA------------GCVLANR----------------------
---LTA-G---------------------TGK-----RVLVLEAGS-GDYA---------
------------------------------------------DTRIRIPAGVLDLFQ-GP
-NDWHFTTQNEP-----AT-SGH-GVYV-----CRGK-----------------------
-VLGGSSSMS---------------------------VMLYNRGSAHDYD----------
---------RWESA--FGLGEWSAASVLPFFKLSQDD-QTGL---------------WSS
DPRHHST---GGPWGVDHVRYQNP-LSK--------------------CFLKAC-A----
----E-AGLPA-NSDFNNWGQPQE-------------GAGR-------------------
----FTVS-HRGGSRVSSALALL---DP--AVRDA--------SRH-LAVLCGALAHRVI
FEE-------------------------GRVAAGVEFSV-----------------GGAV
HTARLA-----PGGEVLL------------AGGA-----VQSPQLLMLSGVGPEEHLAEH
GITTISHLAGVGGNYQDHPAANVSF----------EC-AESKRGV----SPTSHCIFA--
--------FG-RKIP-----------HPWWILRWFLFGS--GP----LTSP---------
GCDHGG---------------FFRTEA--AG--------------------GELPLPDLQ
-------------------M---RFLPARAVTADGMNSFA-KFRET---T------R-L-
-PDG---FSFQSI-AVRP-----------HSR-G-----------CVRLASASALD-K--
----PIIEGNYLQDE-----RDVASIREGLR-----------------------------
---LSRRL--A--------------------------------------------QQPAF
AE-FLGPEVFPGPAVQ-----TDGQLNAYIAETVPVHTANAVVGTCRMGSP---------
--ED-P----LT--------------VCDG-ELRVV-GTRGLRVCD----ASV----MPT
L------PG----CQTG----APTVMIAERAASMI-------------------------
------------------------------------------------------------
------------------------------------------------------------
------------------------------------------------------------
------------------------------------------------------------
------------------------------------------------------------
------------------------------------------------------------
------------------------------------------------------------
------------------------------------------------------------
------------------------------------------------------------
------------------------------------------------------------
-------------------------------------
>50882223
------------------------------------------------------------
------------------------------------------------------------
------------------------------------------------------------
------------------------------------------------------------
------------------------------------------------------------
------------------------------------------------------------
------------------------------------------------------------
------------------------------------------------------------
------------------------------------------------------------
-------------------------------------------R-KLLSTA---------
---AASGEYNYI-------------------SCVLAKR----------------------
---LLDAN---------------------PDH-----KVLVLEAGS-SDYD---------
------------------------------------------DRFIRIPAGIGRLFK-SD
-KDWDFTSSSSAE-AGLGP-THS-GVYL-----CRGK-----------------------
-VLGGSSCTN---------------------------VLLYNRGSARDYD----------
---------GW------GVPGWGSEEVLEYFKKSESN-N------------------AVS
NDKFHGM---AGPYEVDSVQYTNP-LID--------------------TFLGAS-V----
----K-AGYSR-NSDFNDWDRGQE-------------GVGP-------------------
----FHVA-QRNGVRSSAASAYL---SQ--VEK----------DNR-LEVVTGAHVKKLA
IDAG------------------------KKEARGVHYAK-----------------DGME
VFTSIK-----EGGEVIL------------AAGS-----VGSPHILMLSGIGPRQHLEEH
GIDCVADLP-VGENLQDHPAAVVSY----------TV----DQKV----SVTDE-FKL--
--------FGISNIP-----------NPWPMIKYLLTGT--GP----MTSV---------
GCDYGG---------------FFKTSE--SK-----------------------EDPDLQ
-------------------M---RFIGALAQSPLGISNYK-EYARKW--L------S-W-
-PSG---FTFQNI-CVRP-----------KSK-G-----------YVRLQSANYGD-K--
----PVISTGYLSSE-----EDIESIRNGIK-----------------------------
---LSRKL--G--------------------------------------------ASEEF
KK-YNPVELYPGPEVQ-----TDEEIDEYIRNS--AHSGNALVGSCRMGVD---------
--SK------TA--------------VVDP-ELRVM-GFKSLRVID----SSV----MPV
L------PG----GQTC----SSTLMIAEKGADLL-------------------------
------------------------------------------------------------
------------------------------------------------------------
------------------------------------------------------------
------------------------------------------------------------
------------------------------------------------------------
------------------------------------------------------------
------------------------------------------------------------
------------------------------------------------------------
------------------------------------------------------------
------------------------------------------------------------
-------------------------------------
>113633613
------------------------------------------------------------
------------------------------------------------------------
------------------------------------------------------------
------------------------------------------------------------
------------------------------------------------------------
------------------------------------------------------------
------------------------------------------------------------
------------------------------------------------------------
------------------------------------------------------------
------------------------------------------------------------
---IISSEYDYIIAGGGLA------------ACLLAER----------------------
---LSV-D---------------------KSK-----SVLVLEAGR-SDYD---------
------------------------------------------AAIIRIPAGVLRLFR-SV
-YDWQYESCGEK-----NC-NGR-NVFL-----QRGK-----------------------
-VIGGSSCTF---------------------------VCLHHRGSAKDYD----------
---------NW------EVPGWSAKDVLPYFKKSQHD-NTGK-----------------C
DPEFHGT---GGEWVMDHVRYQNP-LSE--------------------KFLEVG-E----
----K-WGLGT-NDDFNNWSRPQD-------------GVGR-------------------
----FHVS-QINGERCTGGLAFL---SK--AKG----------RKN-LKVRSGTMAKHIN
FDD-------------------------SKTATGVTYDLM-------G------DDTCTT
FEAKLK-----KGGEVLV------------AGGV-----FGSPQLLMCSGIGPAAHLKEL
AIRVISDLPGVGQNLQDHPSANVSF----------RT-P--KKGV----SVTSK-LRL--
--------FG-K--T-----------NPFPVLKWLFFKR--GL----LTSV---------
GCDYGA---------------FVKTSA--SV----------------------DDQADLQ
-------------------I---RFLAAKAVNPDGMTSFT-EFRNT---K------K-M-
-EDG---YTFQSV-CVRA-----------RSK-G-----------CVRLASSNSHI-K--
----PIIDTAYLSEE-----SDLATLREGIK-----------------------------
---LGRKL--G--------------------------------------------NSNTW
GV-FKGEEVFPGPSVQ-----TDDEIDNYIRNT--LHTANALVGTCKMGSG---------
--VD-------A--------------VVGP-DLCVI-GVNGVRVCD----SSV----IPK
I------PG----GQTA----TPTVMIAERAANFL-------------------------
------------------------------------------------------------
------------------------------------------------------------
------------------------------------------------------------
------------------------------------------------------------
------------------------------------------------------------
------------------------------------------------------------
------------------------------------------------------------
------------------------------------------------------------
------------------------------------------------------------
------------------------------------------------------------
-------------------------------------
>26986352
------------------------------------------------------------
------------------------------------------------------------
------------------------------------------------------------
------------------------------------------------------------
------------------------------------------------------------
------------------------------------------------------------
------------------------------------------------------------
------------------------------------------------------------
------------------------------------------------------------
------------------------------------------------------------
---------DYIIVGGGTA------------GSLLANR----------------------
---LTS-G-------------------KAAGK-----RVLVLEAGS-GDYN---------
------------------------------------------HPMVKIPAGVLKLFQ-GD
-KDWNFTSTNEK-----QT-SGR-GIYL-----CRGK-----------------------
-ILGGSSALN---------------------------VLLYTRGDKHDYD----------
---------IWESE--YGCVNWGSTDVLPLFKRTQDD-LTGC---------------ASK
NPKHHAT---GGEWAVEHVRYQNP-LSK--------------------LFLQAC-Q----
----Q-AGLPL-NDDFNDWSKKQE-------------GAGR-------------------
----FPVS-TRKGVRCDAASSLL---AP--AQADA--------TRQ-LKVLTGAHVRKI-
-----------------------------------XXXX-----------------XXXX
XXSRLA-----PGGEVLL------------TGGA-----LHSPQVLMLSGVGPQKQLEEH
GIEVIQNLSGVGENLQDHPAAVVSF----------EC-PQDQRGI----SVSSK-IRI--
--------PN-TTLP-----------HPAPMLEWLFRKT--GP----LCST---------
GCDHGG---------------FFRTSA--AP--------------------QDSPSCDLQ
-------------------M---RFLAARAVTADGMGSFT-KFKHI---T------N-H-
-PDG---FSFQSI-AVRP-----------KSR-G-----------RVTLASADPDM-K--
----PIVTTNYLTEE-----EDLATIREGIR-----------------------------
---LGREL--A--------------------------------------------KQPAF
KD-YLGPEVFPGSHVQ-----TDKELNAYISDS--VHTANALVGTCRMGRT---------
--DD-P----LA--------------VVDS-DMCVI-GVRGLRICD----SSV----MPK
I------PG----AQTG----ACTVMIAERAA----------------------------
------------------------------------------------------------
------------------------------------------------------------
------------------------------------------------------------
------------------------------------------------------------
------------------------------------------------------------
------------------------------------------------------------
------------------------------------------------------------
------------------------------------------------------------
------------------------------------------------------------
------------------------------------------------------------
-------------------------------------
>57094970
------------------------------------------------------------
------------------------------------------------------------
------------------------------------------------------------
------------------------------------------------------------
------------------------------------------------------------
------------------------------------------------------------
------------------------------------------------------------
------------------------------------------------------------
------------------------------------------------------------
------------------------------------------------AAK---------
---VAQEEWDYIIVGGGTA------------GCVLANR----------------------
---LTA-G---------------------TGK-----RVLVLEAGG-SDWN---------
------------------------------------------DKRIRIPTGVLHLFQHPQ
-YDWYFNTSKEK-----NT-AGR-GIYL-----CRGK-----------------------
-VLGGSSCLN---------------------------VLLYGRGDAHDYD----------
---------VWGSE--FGLKDWVASKVLPYFKRTEGD-RSGL---------------AEK
DPKHHNK---DGEWGVDHVRYQNV-MSK--------------------CFLEAC-D----
----E-MGLPA-NDDFNNWDRNQE-------------GAGR-------------------
----FHVS-ERNGTRASAASALL---AP--AQADK--------SRS-LAVLCGASVSKIQ
FDSVT-----------------------SKKATGVSFTC-----------------GGES
HSARLK-----LGGEVIV------------TLGS-----IQSPQLLMISGIGPKAHLASH
NIAVVADRAGVGENLRDHPAANVSY----------QC-PDSKKGI----SPTSKAFFV--
--------MG-KKLP-----------DPAWLWEWLTRKS--GP----LTSP---------
GCDHGG---------------FFRTPA--AS--------------------QENNSPDLQ
-------------------M---RFLAVRAVTADGMNSVA-KFRDV---R------N-H-
-PDG---FSFQNI-AARP-----------HSV-G-----------RVSLASSNMSD-H--
----PIVEGNYLTDP-----RDVATLREGLK-----------------------------
---LSRKI--A--------------------------------------------QQKAF
KD-FVGHEVFPGPEVQ-----TDEQLDAYIEES--IHTANALVGTCRMGRS---------
--DD-P----LA--------------VCDS-EMRVL-GVHNLRVCD----ASV----MPK
L------PG----CQTG----APTVMIAERAA----------------------------
------------------------------------------------------------
------------------------------------------------------------
------------------------------------------------------------
------------------------------------------------------------
------------------------------------------------------------
------------------------------------------------------------
------------------------------------------------------------
------------------------------------------------------------
------------------------------------------------------------
------------------------------------------------------------
-------------------------------------
>56991765
------------------------------------------------------------
------------------------------------------------------------
------------------------------------------------------------
------------------------------------------------------------
------------------------------------------------------------
------------------------------------------------------------
------------------------------------------------------------
------------------------------------------------------------
------------------------------------------------------------
------------------------------------------------------------
-------EYDYIICGGGVA------------GCILARR----------------------
---LSENN---------------------PDS-----KILLLEAGK-AKQN---------
------------------------------------------SASVQIPAKVVSTFN-SD
-IDWSYSSTGSQ-----HC-NGK-NIFI-----PRGK-----------------------
-TLGGSSCIN---------------------------VMLVNRGDRNDYN----------
---------EWMRR---GADDWGAEEVLPYFKKSEDY-KQDG------------------
NPMYHSK---NGHYQVDDVKYQSQ-LSR--------------------LFFDAC-V----
----E-SGIKY-NNDFNDWDHDQE-------------GFGR-------------------
----FKVS-QKNGRRWTAANSYL---KE--AQN----------CANGLKVRSSVTVNRIL
LDK-------------------------SKKATGVEVKDF----------------SGKN
RQIKCK-----PTGEVLV------------CGGA-----INSPKLLQLSGIGPKDVLSKA
NVECQVNLPGVGKNLQDHPAVVITH----------NV----EKGK----ASTDE-MVWR-
-------PIGMKAKP-----------RLKAITKWLVNGN--GP----LTSP---------
GCDHGA---------------YYRTDK--RL-----------------------QSPDVQ
-------------------F---RFVAARGADPDGVLSYI-KIAKE---G------A-P-
-ISG---LTLQVL-AIRP-----------KSV-G-----------SVEIQSNDPNE-K--
----PNVDLGFLSNS-----ADVASMVKGVK-----------------------------
---KGREI--L--------------------------------------------ASSAF
QDVVVGDEIWPGKDVQ-----TDAEIEQYIRTN--VHTANAIVGTCKIGRA---------
--SD-R----YA--------------VVDN-ELRVH-GTSNLRVID----SSV----MPK
I------PG----GQTA----SSTVMIAERGADLV-------------------------
------------------------------------------------------------
------------------------------------------------------------
------------------------------------------------------------
------------------------------------------------------------
------------------------------------------------------------
------------------------------------------------------------
------------------------------------------------------------
------------------------------------------------------------
------------------------------------------------------------
------------------------------------------------------------
-------------------------------------
>116669807
------------------------------------------------------------
------------------------------------------------------------
------------------------------------------------------------
------------------------------------------------------------
------------------------------------------------------------
------------------------------------------------------------
------------------------------------------------------------
------------------------------------------------------------
------------------------------------------------------------
------------------------------------------------------------
------------------------------------------------------------
------------------------------------------------------------
--------------------------------------------------------R-TK
-FDWIYDSEKSA-----EC-HDR-SIYL-----CRGK-----------------------
-LLGGSSCTN---------------------------VLLYNRGDKSDYD----------
---------GWAAD--YNLKSWSGDQCLPYFKKAEDD-YRGN------------------
SPEFHGQ---GGPIAVSDVRYQNP-LSK--------------------TFLSAC-A----
----E-AGASRFNSDFNDWSIGQE-------------GYGR-------------------
----FSVM-ERKGERSSSAKEYL---EP--AMG----------RKN-LQIIQNAQVGKIT
FDG--------------------------KTASGVDIQW-----------------GNKA
VSASLA-----AGGEVLL------------SGGA-----INSPQTLMLSGVGPAEHLQQH
GIEVVKDLKGVGENLQDHPAAVVSF----------EC-TPEHKGI----SPTSI-IRI--
--------GG-TGLT-----------NPLPIAKWLTQKS--GV----LTST---------
GCDHGG---------------FFKTSA--AG-----------------------DSPDLQ
-------------------M---RFLAAKAVSPDGMGSFT-NFRKT---A------G-H-
-ADG---FSFQSI-AARA-----------HSR-G-----------SVKLASTNPAD-K--
----AKVETGYLRDE-----RDLETIREGLK-----------------------------
---LGRKI--A--------------------------------------------ASPAF
DQ-YRGQEVYPGAHVQ-----SDADLDAYIRGS--IHTSNALVGTCRMGVS---------
--SD-S----DA--------------VVDE-ELKVH-GVSGLRVVD----ASV----MPR
I------PG----GQTG----SSTFMVAEKAADMILG-----------------------
------------------------------------------------------------
------------------------------------------------------------
------------------------------------------------------------
------------------------------------------------------------
------------------------------------------------------------
------------------------------------------------------------
------------------------------------------------------------
------------------------------------------------------------
------------------------------------------------------------
------------------------------------------------------------
-------------------------------------
>115651140
------------------------------------------------------------
------------------------------------------------------------
------------------------------------------------------------
------------------------------------------------------------
------------------------------------------------------------
------------------------------------------------------------
------------------------------------------------------------
------------------------------------------------------------
------------------------------------------------------------
------------------------------------------------------------
------------------------------------------------------------
-------------------------------K-----KVLVLEAGT-PDYN---------
------------------------------------------AMIVRIPAGILRLFR-NT
KYDWQHETGGEK-----AC-NGR-NVFL-----QRGK-----------------------
-VLGGSSCTN---------------------------VCLHHRGSAQDYD----------
---------DW------GVPGWKAADVLPFFKASQKD-MTGR------------------
SPEFHGV---DGDWVMDDVRYQNP-LSK--------------------RFLEVG-E----
----K-AGLGT-NDDFNNWGRTQE-------------GVGR-------------------
----FQVS-EINGERCSGANAFL---TK--AMK----------NKN-CKVRTGTMVRRIN
FDQ-------------------------SKTATGVTYDLM-------G------DDTMKA
FEAKLN-----PGGEVIV------------TSGA-----IASPQLLLCSGIGPSQHLKDH
GIPVVHDNPNVGENLQDHPAAVVSF----------KT-P--VKGV----SVTSK-LRL--
--------FG-M--T-----------NPFPILQWLIFKT--GL----LTST---------
GCDHGA---------------FVRTSA--SI----------------------KGQPDLQ
-------------------I---RFLAARALGPDGMTTFT-QFRNS---K------S-H-
-DDG---YSLQSV-ACRA-----------KSQ-G-----------SVRLVSSNTHI-K--
----PAIDGGYLSDP-----NDLKTLREGIK-----------------------------
---LGRQL--G--------------------------------------------NSPDW
GE-YLGEEVYPGLDVQ-----TDAEIDEYIKNT--IHTANALTGTCKMGTG---------
--KD-------A--------------VVTP-ELKVI-GVNGVRVAD----SST----IPI
L------PG----GQTA----TPTVMIAERAAAFL-------------------------
------------------------------------------------------------
------------------------------------------------------------
------------------------------------------------------------
------------------------------------------------------------
------------------------------------------------------------
------------------------------------------------------------
------------------------------------------------------------
------------------------------------------------------------
------------------------------------------------------------
------------------------------------------------------------
-------------------------------------
>95129187
------------------------------------------------------------
------------------------------------------------------------
------------------------------------------------------------
------------------------------------------------------------
------------------------------------------------------------
------------------------------------------------------------
------------------------------------------------------------
------------------------------------------------------------
------------------------------------------------------------
------------------------------------------------------------
------------------------------------------------------------
------------------------------------------------------------
---------------------------------------------VRVPAALVKVFK-SE
-LDWNFQTAPVQ-----GT--DR-GVYL-----CRGK-----------------------
-ALGGSSSTN---------------------------VMLYHRGTPADYE----------
---------KWEAK---GAKGWGPTDVLPYFRKAEDN-AEG-------------------
PSEYHGV---DGPMPVQDVPYVNP-LSR--------------------AFLAAA-G----
----Q-LGFRR-QHDFNDWSTPQE-------------GFGR-------------------
----FKVT-QNNGERCSAWNAYG---AA--AAA----------RPN-LTVRAGCHVTKIA
LDK-------------------------AVVATGVEYKQ-----------------GGEA
CTAKLA-----KGGEVLL------------CAGA-----VQSPHVLMLSGLGPKAHLEEH
GVPVRKDIPGVGVGLQDHPTALVSY----------GS----SQKV----SITDE-IRL--
--------FG-SGYP-----------NPLTTLKWLLFRR--GA----LTTV---------
ACEFGG---------------FFRTPRA-ET-----------------------AQADLQ
-------------------V---RFIAARAMNADGISTLE-KFGAG---A------R-T-
-TPG---YTAQVV-AIRP-----------KSE-G-----------RVRMQSADPFD-K--
----PVLENVHLSND-----EDVRTLREGIK-----------------------------
---LGRRL--L--------------------------------------------QAESF
DE-YRTEEVYPGAKVQ-----SDADIDAFVRSS--VHSANALTSSCRMGSE---------
--KD-P----MA--------------VLDA-ELRLR-GVGALRVID----ASV----FPQ
I------PG----GQTC----APTIMVAEKAADLL-------------------------
------------------------------------------------------------
------------------------------------------------------------
------------------------------------------------------------
------------------------------------------------------------
------------------------------------------------------------
------------------------------------------------------------
------------------------------------------------------------
------------------------------------------------------------
------------------------------------------------------------
------------------------------------------------------------
-------------------------------------
>88606846
------------------------------------------------------------
------------------------------------------------------------
------------------------------------------------------------
------------------------------------------------------------
------------------------------------------------------------
------------------------------------------------------------
------------------------------------------------------------
------------------------------------------------------------
------------------------------------------------------------
------------------------------------------------------------
---VAQEEWDYIIVGGGTA------------GCVLANR----------------------
---LTA-G---------------------TGK-----RVLVLEAGG-SDWN---------
------------------------------------------DKRIRIPTGVLHLFQHPQ
-YDWYFNTSKEK-----KT-AGR-GIYL-----CRGK-----------------------
-VLGGSSCLN---------------------------VLLYGRGNAHDYD----------
---------VWGSE--FGLKDWVASKVLPYFKRTEGD-RSGL---------------AEK
DPKHHNK---DGEWGVDHVRYQNV-MSK--------------------CFLEAC-D----
----E-MGLPA-NDDFNNWDRNQE-------------GAGR-------------------
----FHVS-ERNGTRASAASALL---AP--AQADK--------SRS-LAVLCGASVSKIQ
FDSVT-----------------------SKKATGVSFTC-----------------GGES
HSARLK-----LGGEVIV------------TLGS-----IQSPQLLMISGIGPKAHLASH
NIAVVADRAGVGENLRDHPAANVSY----------QC-PDSKKGI----SPTSKAFFV--
--------MG-KKLPDPAWLWEWLTRDPAWLWEWLTRKS--GP----LTSP---------
GCDHGG---------------FFRTPA--AS--------------------QENNSPDLQ
-------------------M---RFLAVRAVTADGMNSVA-KFRDV---R------N-H-
-PDG---FSFQNI-AARP-----------HSV-G-----------RVSLASSNMSD-H--
----PIVEGNYLTDP-----RDVATLREGLK-----------------------------
---LSRKI--A--------------------------------------------QQKAF
KD-FVGHEVFPGPEVQ-----TDEQLDAYIEES--IHTANALVGTCRMGRS---------
--DD-P----LA--------------VCDS-EMRVL-GVHNLRVCD----ASV----MPK
L------PG----CQTG----APTVMIAERAA----------------------------
------------------------------------------------------------
------------------------------------------------------------
------------------------------------------------------------
------------------------------------------------------------
------------------------------------------------------------
------------------------------------------------------------
------------------------------------------------------------
------------------------------------------------------------
------------------------------------------------------------
------------------------------------------------------------
-------------------------------------
>116782156
------------------------------------------------------------
------------------------------------------------------------
------------------------------------------------------------
------------------------------------------------------------
------------------------------------------------------------
------------------------------------------------------------
------------------------------------------------------------
------------------------------------------------------------
------------------------------------------------------------
------------------------------------------------------------
---VVADGYDYIITGGGLA------------GCLLADR----------------------
---LTA-D---------------------GTK-----KVLVLEAGT-PDYN---------
------------------------------------------AMIVRIPAGILRLFR-NT
KYDWQHETGGEK-----AC-NGR-NVFL-----QRGK-----------------------
-VLGGSSCTN---------------------------VCLHHRGSAQDYD----------
---------DW------GVPGWKAADVLPFFKASQKD-MTGR------------------
SPEFHGV---DGDWVMDDVRYQNP-LSK--------------------RFLEVG-E----
----K-AGLGT-NDDFNNWGRTQE-------------GVGR-------------------
----FQVS-EINGERCSGANAFL---TK--AMK----------NKN-CKVRTGTMVRRIN
FDQ-------------------------SKTATGVTYDLM-------G------DDTMKA
FEAKLN-----PGGEVIV------------TSGA-----IASPQLLLCSGIGPSQHLKDH
GIPVVHDNPNVGENLQDHPAAVVSF----------KT-P--VKGV----SVTSK-LRL--
--------FG-M--T-----------NPFPILQWLIFKT--GL----LTST---------
GCDHGA---------------FVRTSA--SI----------------------KGQPDLQ
-------------------I---RFLAARALGPDGMTTFT-QFRNS---K------S-H-
-DDG---YSLQSV-ACRA-----------KSQ-G-----------SVRLVSSNTHI-K--
----PAIDGGYLSDP-----NDLKTLREGIK-----------------------------
---LGRQL--G--------------------------------------------NSPDW
GE-YLGEEVYPGLDVQ-----TDAEIDEYIKNT--IHTANALTGTCKMGTG---------
--KD-------A--------------VVTP-ELKVI-GVNGVRV----------------
------------------------------------------------------------
------------------------------------------------------------
------------------------------------------------------------
------------------------------------------------------------
------------------------------------------------------------
------------------------------------------------------------
------------------------------------------------------------
------------------------------------------------------------
------------------------------------------------------------
------------------------------------------------------------
------------------------------------------------------------
-------------------------------------
>64007966
------------------------------------------------------------
------------------------------------------------------------
------------------------------------------------------------
------------------------------------------------------------
------------------------------------------------------------
------------------------------------------------------------
------------------------------------------------------------
------------------------------------------------------------
------------------------------------------------------------
------------------------------------------------------------
------------------------------------------------------------
-------------------------------------RVLVLEAGS-GDYN---------
------------------------------------------HPMVRIPAGVLKLFQ-GD
-KDWNFTSVNET-----KT-SGR-GIYL-----CRGK-----------------------
-VLGGSSALN---------------------------VALYTRGDKHDYD----------
---------AWETE--FGCVGWGAKDVLPLFMRTEDD-RTGH---------------AVK
TPRHHGV---CGEWAVEHVRYQNP-LSK--------------------LFLQAC-K----
----Q-AGLPM-NDDFNDWSKKQE-------------GAGR-------------------
----FPVS-SRRGERVHAASALL---AP--ALADS--------KRQ-LQVLTGALVRKII
FEK--------------------------NVAKGVQFAA-----------------DGVV
HIARLA-----PDGEVLL------------AGGA-----VHSPQVLMLSGIGPKEQLEQN
GIKVLQDLPGVGENLQDHPAAVVSF----------EC-PKNQSGV----SVTSK-IRI--
--------PG-TTLP-----------HPAPVLEWLFKKT--GP----LCST---------
GCDHGG---------------FFRTSA--AP--------------------AGCPSPDLQ
-------------------M---RFLAARAVTADGMGSFT-KFRDM---T------N-H-
-PDG---FSFQSI-AVRP-----------QSR-G-----------RVLLASSDPDA-K--
----PLIETNYLSSE-----QDFATIREGIR-----------------------------
---LGRKL--A--------------------------------------------QQPAF
KE-FLGSEVFPGTHVQ-----SDKELDAYISDS--THTANALVGTCRMGPA---------
--GD-A----KT--------------VVDP-DMRVK-GMTGLRVCD----ASI----MPK
L------PG----GQSG----ACTVMIAEHAA----------------------------
------------------------------------------------------------
------------------------------------------------------------
------------------------------------------------------------
------------------------------------------------------------
------------------------------------------------------------
------------------------------------------------------------
------------------------------------------------------------
------------------------------------------------------------
------------------------------------------------------------
------------------------------------------------------------
-------------------------------------
>32145453
------------------------------------------------------------
------------------------------------------------------------
------------------------------------------------------------
------------------------------------------------------------
------------------------------------------------------------
------------------------------------------------------------
------------------------------------------------------------
------------------------------------------------------------
------------------------------------------------------------
------------------------------------------VA-SDSDIA---------
---VETTEYDYIICGGGVG------------GCILANK----------------------
---LSESD---------------------PDA-----NILLLEAGK-AKQN---------
------------------------------------------SGKVKIPAKVVHTFR-SD
-IDWSYESIGTD-----HC-NGK-NIFI-----PRGK-----------------------
-SLGGSSCIN---------------------------VMLVNRGDKNDYN----------
---------EWEQQ---GAENWGADDVLPYFKNSEDY-KQEG------------------
NPAYHSK---KGLYQVTDVGYQNN-LSR--------------------LFFQAC-I----
----E-SGLKY-NGDFNDWDHDQE-------------GFGR-------------------
----FKVS-QCQGRRWTAATSHL---KA--AQS----------RQNGLRVRSSVTVNKIN
LDE-------------------------KKQATGVEIKDM----------------FGRI
KKINCK-----SNGEVLV------------CGGA-----INSPKLLQLSGIGPKAVLSKA
NVDCKVNLSGVGKNLQDHPAVVITR----------NV----KKGL----SATDD-MVWR-
-------PPIGKALP-----------KVKAITNWLVAGR--GS----LTSP---------
GCDHGA---------------FYRTDK--RM-----------------------KSPDIQ
-------------------Y---RFVAARGADPDGVVSYI-KISNE---G------A-P-
-VSG---LTLQVL-AARP-----------KSV-G-----------SVNIQSNDPDE-K--
----PAVDLGFLSNA-----ADVASLVKGVK-----------------------------
---KGREI--L--------------------------------------------ASVAF
EDVLEGDEIWPGNDLK-----SDAQIEKYVRTH--VHTANAIVGTCKIGRA---------
--SD-K----NA--------------VVDN-ELRVH-GTSNLRVVD----ASV----MPK
------------------------------------------------------------
------------------------------------------------------------
------------------------------------------------------------
------------------------------------------------------------
------------------------------------------------------------
------------------------------------------------------------
------------------------------------------------------------
------------------------------------------------------------
------------------------------------------------------------
------------------------------------------------------------
------------------------------------------------------------
-------------------------------------
>18361266
------------------------------------------------------------
------------------------------------------------------------
------------------------------------------------------------
------------------------------------------------------------
------------------------------------------------------------
------------------------------------------------------------
------------------------------------------------------------
------------------------------------------------------------
------------------------------------------------------------
------------------------------------------------------------
------EEWDYIILGAGAA------------GCTLANR----------------------
---LTE-D---------------------PSI-----RVLVLEAGD-DASNDLKVRIPAM
LIKVLRSEMDWNFETEPDDNGTPHGVYLCRGKTLGGSTCANVDLKVRIPAMLIKVLR-SE
-MDWNFETEPDD-----NG-TPH-GVYL-----CRGK-----------------------
-TLGGSTCAN---------------------------VQLYHRGTETDYK----------
---------SWEQA---GAVGWGPKDVLPYFRKSESY-HGG-------------------
ADKYHGA---DGPMTVGQVPYFNP-LSA--------------------IFFDAM-G----
----E-LGYRR-THDFNDWSAPQE-------------GFGR-------------------
----YSVT-QRNGERVSTASTYL---KQ--ARG----------RPN-LVVRTGAHVSRLL
LDGAA-----------------------DLAATGVSYLQ-----------------SGNE
KAAKLA-----AGGEVLL------------AAGA-----VQSPQILMLSGIGPRAHLEDH
GIQVRKEVDGVGQGLQDHPAVLVSF----------ES----KLVC----SLTDH-IRL--
--------WG-TALP-----------NPLTLLNWFVRGK--GA----LTTV---------
ACEQGG---------------FFRTTP--DK-----------------------PQPDLQ
-------------------L---RFLPERSMSPDGMNSLQ-KMGGG---A------APP-
-KSG---FTFQCL-ACRP-----------QAR-G-----------RVRLRDANPLS-K--
----PLVEGLYLSQG----GADIATLREGIK-----------------------------
---LGRRL--S--------------------------------------------QTKAF
EA-VRGEELYPGADVV-----SDEALDSYVRNT--IHSANALVGSCRMGAA---------
--AD-P----LA--------------VLDP-QLRVR-GVRALRVVD----ASA----MPR
I------PG----GQTA----A--------------------------------------
------------------------------------------------------------
------------------------------------------------------------
------------------------------------------------------------
------------------------------------------------------------
------------------------------------------------------------
------------------------------------------------------------
------------------------------------------------------------
------------------------------------------------------------
------------------------------------------------------------
------------------------------------------------------------
-------------------------------------
>45081375
------------------------------------------------------------
------------------------------------------------------------
------------------------------------------------------------
------------------------------------------------------------
------------------------------------------------------------
------------------------------------------------------------
------------------------------------------------------------
------------------------------------------------------------
------------------------------------------------------------
------------------------------------------------------------
------------------------------------------------------------
------------------------------------------------------------
------------------------------------------------------------
------------------------------------------------------------
------------------------------------------------------------
------------------------------------------------------------
------------------------------------------------------------
------------------------------------------------------------
-------------------------------------------------------VNRVV
FDQ--------------------------KKAVGVEYICE-------E-----LSPMREL
MTASLK-----AQGEVIM------------SSGS-----IHTPQILQMSGVGDARALSEF
GIASVADLPGVGANLQDQPAVVVSG----------PV-KREFEGK----SVTDH-IYN--
--------SR-GNM------------RKRALLNYLLFGK--GP----LTST---------
GCDRGA---------------MVRTAA--AA----------------------GHLPDLQ
-------------------V---RFVPAMALDPDGVSSYT-RFGKF---KKLGR--K-W-
-PSG---VTIQLV-ASRA-----------ASR-G-----------SVSLKSPDPFD-T--
----PLINAGYLTDP---EGRDMETLKNGIE-----------------------------
---LARKI--A--------------------------------------------STGVM
SS-VLDGELFPGTDVT-----TAAGAEEYIRRT--IHSSNALVGTCRMGTS---------
--AA-N----GD--------------VVDN-NLRIF-GLEGIRVVD----ASV----IPI
I------PG----GQTG----APTVMIAERAADMI-------------------------
------------------------------------------------------------
------------------------------------------------------------
------------------------------------------------------------
------------------------------------------------------------
------------------------------------------------------------
------------------------------------------------------------
------------------------------------------------------------
------------------------------------------------------------
------------------------------------------------------------
------------------------------------------------------------
-------------------------------------
>96994444
------------------------------------------------------------
------------------------------------------------------------
------------------------------------------------------------
------------------------------------------------------------
------------------------------------------------------------
------------------------------------------------------------
------------------------------------------------------------
------------------------------------------------------------
------------------------------------------------------------
------------------------------------------------------------
---VVQDSYDFIIAGGGLA------------GCLLADR----------------------
---LSA-H---------------------G-K-----KVLVLEAGS-PDYN---------
------------------------------------------SMIVRIPAGILRLFR-NT
KYDWQHETGGEK-----VC-NGR-NVFL-----QRGK-----------------------
-VLGGSSCTN---------------------------VCLHHRGSAQDYD----------
---------DW------GVPGWKAEDVLPFFKESQKD-MTER------------------
SPEFHGK---DGDWIMDDVRYQNP-LSK--------------------RFLEVG-A----
----K-AGLGI-NDDFNNWGRTQE-------------GVGR-------------------
----FQVS-ETNGERCSGANAFL---TK--AMK----------NKN-CNIRTGTMVRRIN
FDK-------------------------SKTATGVTYDLM-------G------DDTMKA
FEAKLN-----PGGEVIV------------TAGA-----IASPQLLMCSGIGPSQHLKNL
GIPVVYDNSNVGENLQDHPAAVVSF----------KT-P--NRGV----SVTSK-LRL--
--------FG-L--T-----------NPLPFLQWLLFKT--GL----LTST---------
GCDHGG---------------FVRTLA--SV----------------------DGQPDLQ
-------------------I---RFLAARALEPDGMTTFT-QFKNT---K------Y-L-
-EDG---YSFQSV-ACRA-----------KSK-G-----------CVRLASSNSHV-K--
----PTIDGGYLNNL-----ADMKTLREGIK-----------------------------
---LGRQL--G--------------------------------------------NRPEW
GE-YLGEEVYPGLDIR-----TDAQIDEYIKNS--LHTANALTGTCKMGTG---------
--KD-------A--------------VVSP-ELKVI-GVSGVRVAD----SST----I--
------------------------------------------------------------
------------------------------------------------------------
------------------------------------------------------------
------------------------------------------------------------
------------------------------------------------------------
------------------------------------------------------------
------------------------------------------------------------
------------------------------------------------------------
------------------------------------------------------------
------------------------------------------------------------
------------------------------------------------------------
-------------------------------------
>56375169
------------------------------------------------------------
------------------------------------------------------------
------------------------------------------------------------
------------------------------------------------------------
------------------------------------------------------------
------------------------------------------------------------
------------------------------------------------------------
------------------------------------------------------------
------------------------------------------------------------
------------------------------------------------------------
-----------------TA------------GCVLANR----------------------
---LTA-----------------------AKK-----RVLVLEAGR-ADYD---------
------------------------------------------ATLLRMPLGVLRLFK-SK
-YDWDFTTCNEA-----NT-SGR-GIFL-----PRGK-----------------------
-VLGGSSCLN---------------------------VLLYNRGDANDYN----------
---------LWEEK--FGCQGWAAKDVLPYFKRTEDN-QTGL---------------AKS
DPVHHST---GGEWSVDHVRYQNP-MSK--------------------RFLDAC-K----
----E-MGLPF-NNDFNSWKHKQE-------------GAGR-------------------
----FFVS-ERRGVRCSAASAML---EP--ALKDG--------KRC-LRVLSGSRVQKIL
FAKD------------------------GDKTTGVIFQA-----------------GDID
HLAKLA-----PGGEVLL------------TGGA-----IHSPQLLMLSGLGPAKHLEEH
GIKVVRDLPGVGENLQDHPAATVSY----------QC-PIAGWGV----STVSK-IRL--
--------FG-TKVP-----------HPKAMLEWLLFGS--GP----LTSP---------
LCDHGG---------------FFYTPA--AS--------------------EGAKSPDLQ
-------------------M---RFVAARATMADGMKSYC-TAREQ---T------N-H-
-PDG---MTFQSI-AVRP-----------HSR-G-----------RVCLASANPRE-K--
----PIIEGNYLTDE-----RDMATIREGLR-----------------------------
---LSRKI--A--------------------------------------------KQPAF
AK-YLGHEVFPGPEFQ-----TDAQLNTYIAST--VHTANALVGTCRMGQA---------
--SD-P----QA--------------VCDP-AMRVH-RVTGLRVCD----SSV----MPQ
M------PG----GQTG----APTVMIAERAAEMI-------------------------
------------------------------------------------------------
------------------------------------------------------------
------------------------------------------------------------
------------------------------------------------------------
------------------------------------------------------------
------------------------------------------------------------
------------------------------------------------------------
------------------------------------------------------------
------------------------------------------------------------
------------------------------------------------------------
-------------------------------------
>8213673
------------------------------------------------------------
------------------------------------------------------------
------------------------------------------------------------
------------------------------------------------------------
------------------------------------------------------------
------------------------------------------------------------
------------------------------------------------------------
------------------------------------------------------------
------------------------------------------------------------
------------------------------------------------AAK---------
---AAQEEWDYIIVGGGTA------------GCVLANR----------------------
---LTA-G---------------------TRK-----SVLVLEAGG-SDFD---------
------------------------------------------DKRIRIPTGVLHLFQHPQ
-YDWYFNTSNEK-----KT-AGR-GIYL-----CRGK-----------------------
-VLGGSSCLN---------------------------VLLYGRGNAHDYD----------
---------LWGSE--FGLTDWVASKVLPYFKRTEGD-RSGL---------------AEK
DPKHHSK---DGEWGVDHVRYQNV-MSK--------------------CFLQAC-D----
----E-LGLPA-NEDFNNWDRNQE-------------GAGR-------------------
----FHVS-ERNGMRCSSASALL---AP--AQADK--------SRS-LTVLCGASVSKIL
FDT-------------------------RNSATGVNFTC-----------------GGTI
QNARLK-----HGGEVIV------------TLGA-----IQSPQLLMISGIGPKAHLESH
NIATISDRAGVGENLRDHPAANVSY----------QC-PDSKRGI----SPTSKAFFI--
--------MG-KKLP-----------NPAWLWEWVTRKS--GP----LTSP---------
GCDHGG---------------FFRTSE--AT--------------------QEKNSPDLQ
-------------------M---RFLAVRAVTADGMNSVA-KFRDV---Q------N-H-
-PDG---FSFQNI-AARP-----------HSV-G-----------RVRLGSSSMAD-H--
----PVVEGNYLSDP-----RDVATLREGLK-----------------------------
---LSRRL--A--------------------------------------------KQDAF
KD-FVGHEVFPGPEVK-----TDEQLDAYISES--VHTANALVGTCRMGRS---------
--DD-P----LA--------------VCDS-EMRVL-GVHNLRVCD----ASV----MPK
L------PG----CQTG----APTVMIAERAA----------------------------
------------------------------------------------------------
------------------------------------------------------------
------------------------------------------------------------
------------------------------------------------------------
------------------------------------------------------------
------------------------------------------------------------
------------------------------------------------------------
------------------------------------------------------------
------------------------------------------------------------
------------------------------------------------------------
-------------------------------------
>66323054
------------------------------------------------------------
------------------------------------------------------------
------------------------------------------------------------
------------------------------------------------------------
------------------------------------------------------------
------------------------------------------------------------
------------------------------------------------------------
------------------------------------------------------------
------------------------------------------------------------
------------------------------------------------------------
------------------------------------------------------------
---------------------------------------LVLEAGS-GDYN---------
------------------------------------------HPMVKIPAGVLKLFQ-GD
-KDWNFTSTNET-----KT-SGR-GIYL-----CRGK-----------------------
-VLGGSSALN---------------------------VLLYTRGDKHDYD----------
---------IWETK--YGCVNWGSSDVLPLFKRTEDD-LTGC---------------ASE
NPKHHAT---GGEWAVEHVRYQNP-LSK--------------------LFLKAC-E----
----Q-AGLPL-NNDFNDWSKKQE-------------GAGR-------------------
----FPIS-SRKGVRCHAASALL---AP--AQADA--------KRQ-LKVLTGAYVRKII
LDG--------------------------KVTQGVQFSA-----------------DGMI
HVARLA-----SGGEVLL------------TGGA-----LHSPQVLMLSGIGPKTHLEEH
GIEAIQNLTGVGENLQDHPAAVVSF----------EC-PEQQRGI----SVSSK-IRI--
--------PH-TTLP-----------HPAPLLEWLFQKT--GP----LCST---------
GCDHGG---------------FFRTSA--AP--------------------QDSPSCDLQ
-------------------M---RFLAARAVTADGMGSFT-KFKHI---T------N-H-
-PDG---FSFQSI-AVRP-----------KSR-G-----------RVTLASADPEM-K--
----PVVTTNYLTRE-----EDLATIREGIR-----------------------------
---LGREL--A--------------------------------------------KQPAF
KD-HLGPEVFPGSHVQ-----TDKELNAYISDS--VHTANALVGSCRMGRI---------
--DD-P----LA--------------VVDA-NMRVI-GVTGLRVCD----SSV----MPE
L------PG----AQTG----ACTVMIAERAA----------------------------
------------------------------------------------------------
------------------------------------------------------------
------------------------------------------------------------
------------------------------------------------------------
------------------------------------------------------------
------------------------------------------------------------
------------------------------------------------------------
------------------------------------------------------------
------------------------------------------------------------
------------------------------------------------------------
-------------------------------------
>44191816
------------------------------------------------------------
------------------------------------------------------------
------------------------------------------------------------
------------------------------------------------------------
------------------------------------------------------------
------------------------------------------------------------
------------------------------------------------------------
------------------------------------------------------------
------------------------------------------------------------
------------------------------------------------------------
------------------------------------------------------------
------------------------------------------------------------
------------------------------------------------------------
------------------------------------------------------------
------------------------------------------------------------
------------------------------------------------------------
------------------------------------------------------------
------------------------------------------------------------
------------------------------------------------------------
------------------------------KAVGVEYISE-------E-----LSPMRVS
MTASLT-----PRGEVIM------------SSGS-----IHTPQILQLSGVGDAGALAAF
GIESVAHVPGVGQNLQDQPAVVVSS----------PV-KREFEGK----SITDQ-IYN--
--------LR-GNI------------RKRALLSWIMFGK--GP----LTST---------
GCDRGA---------------MVRTSA--AQ----------------------GHLPDLQ
-------------------M---RFVPGMALEPDGVSTYT-RFGNF---KKEGR--K-W-
-PSG---VTFQVL-AARA-----------AGK-G-----------QVSLKSDDPFD-S--
----PLIESGYLTDR---DGRDMATLKNGIE-----------------------------
---LARKI--A--------------------------------------------STGTM
SS-VLDGEIFPGADVL-----APAAVEEYIRRT--IHSSNALVGTCRMGTA---------
--AE-N----GD--------------VVDK-DLKIF-GLEGIRVVD----ASV----IPI
I------PG----GQTG----APTVMIAERAADMI-------------------------
------------------------------------------------------------
------------------------------------------------------------
------------------------------------------------------------
------------------------------------------------------------
------------------------------------------------------------
------------------------------------------------------------
------------------------------------------------------------
------------------------------------------------------------
------------------------------------------------------------
------------------------------------------------------------
-------------------------------------
>18170693
------------------------------------------------------------
------------------------------------------------------------
------------------------------------------------------------
------------------------------------------------------------
------------------------------------------------------------
------------------------------------------------------------
------------------------------------------------------------
------------------------------------------------------------
------------------------------------------------------------
------------------------------------------------------------
---VSGQTWDYIIVGGGAAGCALANRLTAAEGCALANR----------------------
---LTA-----------------------AEK-----KVLVLEAGG-ENYK---------
------------------------------------------ATEMKIPAGVLKLFQ-SE
-YDWH-------------L-NNR-SVYL-----CRGK-----------------------
-VLGGSSVTN---------------------------VLLYNRGDANDYN----------
---------VWDTE--FGCKGWKADEVLPDFIRHEND-RTG-----------------ST
STKHHGT---SGELCVEHVRYQNP-MSR--------------------AFLEAC-D----
----Q-AGLPS-NPDFNDWSRKQE-------------GAGR-------------------
----FSVM-TNKGERCDCASAFM---KP--ALDDK--------RRK-LEVLTGAAVRKVN
INE-------------------------NGAATGVKFASA----------------DGNT
HTVNLA-----QGGEVLL------------AGGA-----IHSPQLLMLSGVGPRDHLEKM
GIDVVSDVPAVGSNLQDHPAAVLSY----------QC-PDSQKGV----SMSSK-LRI--
--------PG-TTKP-----------NPLRVFQWLFTGT--GP----MASV---------
GCDHGG---------------FFRTPA--AA----------------------SSSADLQ
-------------------M---RFLATRSVTADGMQSVT-EFRDR---T------S-H-
-PDG---FSFQCL-AARP-----------HSS-G-----------RVLLSSPDPDD-K--
----PIIQGNYLKDS-----RDVATIREGLK-----------------------------
---LGRKL--A--------------------------------------------HQQAF
SK-YIGEEVFPGREVQ-----SDAELDNYIKST--VHTGNALVGTCRMGQP---------
--ND-P----LA--------------VVDT-ELKVK-GVSG-------------------
------------------------------------------------------------
------------------------------------------------------------
------------------------------------------------------------
------------------------------------------------------------
------------------------------------------------------------
------------------------------------------------------------
------------------------------------------------------------
------------------------------------------------------------
------------------------------------------------------------
------------------------------------------------------------
------------------------------------------------------------
-------------------------------------
>5477273
------------------------------------------------------------
------------------------------------------------------------
------------------------------------------------------------
------------------------------------------------------------
------------------------------------------------------------
------------------------------------------------------------
------------------------------------------------------------
------------------------------------------------------------
------------------------------------------------------------
------------------------------------------------------------
------------------------------------------------------------
-----A-D---------------------PAH-----RVLLIEAGG-DASR---------
------------------------------------------DKRAQVPWAFTKLLR-SE
-YDWDFHVEAEA-----AV-NQQ-EVYL-----CRGK-----------------------
-ALGGSSVTN---------------------------VMLYHRGSPADYD----------
---------AWEEA---GARGWGAKDVLPYYLRVEDY-GDG-------------------
ASQYHAV---GGHVSVQEVPYQNQ-LSA--------------------TFLRAM-G----
----Q-LGFRP-NGDFNDWSSPQE-------------GYGR-------------------
----YKVT-QRAGRRCTAADGYL---AA--ARE----------RAN-LVVVTGAQATRLA
LDSAYDG-------------------AGRLQVSGVEFARG---------------DE---
------------------------------------------------PGIGPAEHLREV
GVPVRADLPGVGSGLQDHPAVVVSY----------ES----KKAV----AATDD-ALLKG
YASLVNPLKGYASLV-----------NPLATLRWLLFGR--GP----LACA---------
ACDHGG---------------FVRSSP--DL-----------------------DQPDVQ
-------------------I---RFVPARASSASGMNTLI-ELGRR---A------R-F-
-LPG---FSTQVV-ACRP-----------RSE-G-----------RVRLRSADPFA-K--
----PIIEGIHLGAA-----EDVASLRHGIR-----------------------------
---LGRQV--C--------------------------------------------AAAAF
DE-YRGEEVFPGAAVQ-----SDEQIDEYIRSS--VHSANALTSSCRMGDP---------
--SD-P----AA--------------VLDS-HLRVR-GVGGLRVAD----ASA----MPR
I------IG----GQTQ----APTYMLAERAADIL-------------------------
------------------------------------------------------------
------------------------------------------------------------
------------------------------------------------------------
------------------------------------------------------------
------------------------------------------------------------
------------------------------------------------------------
------------------------------------------------------------
------------------------------------------------------------
------------------------------------------------------------
------------------------------------------------------------
-------------------------------------
>67928406
------------------------------------------------------------
------------------------------------------------------------
------------------------------------------------------------
------------------------------------------------------------
------------------------------------------------------------
------------------------------------------------------------
------------------------------------------------------------
------------------------------------------------------------
------------------------------------------------------------
------------------------------------------------------------
------------------A------------GCVLANR----------------------
---LTA-----------------------ANK-----RVLVLEAGR-ADYD---------
------------------------------------------ATLLRMPLGVLRLFK-SK
-YDWDFTTCNEA-----NT-SGR-GIFL-----PRGK-----------------------
-VLGGSSCLN---------------------------VLLYNRGDANDYD----------
---------LWEEK--FGCQGWAAKDVLPYFKRTEDN-QTGL---------------AKS
DPVHHST---GGEWSVDHVRYQNP-MSK--------------------RFLDAC-K----
----E-MGLPL-NNDFNSWKQKQE-------------GAGR-------------------
----FFVS-ERRGVRCSAASAML---EP--ALKDG--------KRC-LRVLSGSPVQKIL
FAED------------------------GGKTTGVIFQT-----------------GDVD
HLAKLA-----PGGEVLL------------TGGA-----IHSPQLLMLSGLGPANHLEEH
GIKVVRDLPGVGENLQDHPAATVSY----------QC-PISGWGA----STVSK-IRL--
--------FG-TKVP-----------HPKAMLEWLLFGS--GP----LTSP---------
LCDHGG---------------FFYTPA--AS--------------------EGAKSPDLQ
-------------------M---RFVAARATMADGMKSYC-TAREQ---T------N-H-
-PDG---MTFQSI-AVRP-----------HSR-G-----------RVCLASANPRE-K--
----PIIEGNYLTDE-----RDMATIREGLR-----------------------------
---LSRKI--A--------------------------------------------KQPAF
AG-YLGHEVFPGPEFQ-----TDAQLDAYIAST--VHTANALVGTCRMGQA---------
--SD-P----QA--------------VCDP-ALRVH-RVTGLRVCD----SSV----MPQ
M------PG----GQTG----A--------------------------------------
------------------------------------------------------------
------------------------------------------------------------
------------------------------------------------------------
------------------------------------------------------------
------------------------------------------------------------
------------------------------------------------------------
------------------------------------------------------------
------------------------------------------------------------
------------------------------------------------------------
------------------------------------------------------------
-------------------------------------
>84015839
------------------------------------------------------------
------------------------------------------------------------
------------------------------------------------------------
------------------------------------------------------------
------------------------------------------------------------
------------------------------------------------------------
------------------------------------------------------------
------------------------------------------------------------
------------------------------------------------------------
------------------------------------------------------------
------------------------------------------------------------
------------------------------------------------------------
------------------------------------------------------------
----------------------R-NIFL-----QRGK-----------------------
-VLGGSSCTN---------------------------VCLHHRGSAQDYD----------
---------DW------GIPGWKAVDVLPFFKAAQKD-MTGR------------------
SPEFHGK---DGDWVMDEVRYQNP-LSK--------------------RFLEVG-A----
----K-AGLGS-NDDFNNWSRPQD-------------GVGR-------------------
----YQVS-EINGERCTGANAFL---AK--AMK----------RKN-CEVRTGTMCRRIN
FNG--------------------------NTATGVTYDLV-------G------DDTMKP
FTAKLN-----PGGEVLV------------TGGA-----IASPQLLMCSGIGPADHLKDL
GIPVVHNNCHVGKNLQDHPAAVVSF----------ST-P--QKGV----SVTSK-LRL--
--------FG-K--T-----------NPFPIFQWLLMKT--GL----LTST---------
GCDHGG---------------FVRTSA--S-----------------------KDQPDLQ
-------------------L---RFLAAKALGPDGMTTFT-QFRNS---K------S-H-
-GDG---YSFQSI-ACRP-----------KSK-G-----------SVRLASSNTHV-K--
----PLIDLGYLSDK-----EDLKTLRNGIK-----------------------------
---LGRQL--G--------------------------------------------NRPEW
GE-YLGEEVYPGIDVQ-----TDDEIDEYIRNS--VHTSNALTGTCKMGTG---------
--RD-------A--------------VVSP-DLKVI-GVNGVRVAD----SST----IPV
I------PG----GQTA----TPTVMIAD-------------------------------
------------------------------------------------------------
------------------------------------------------------------
------------------------------------------------------------
------------------------------------------------------------
------------------------------------------------------------
------------------------------------------------------------
------------------------------------------------------------
------------------------------------------------------------
------------------------------------------------------------
------------------------------------------------------------
-------------------------------------
>1070153
------------------------------------------------------------
------------------------------------------------------------
------------------------------------------------------------
------------------------------------------------------------
------------------------------------------------------------
------------------------------------------------------------
------------------------------------------------------------
------------------------------------------------------------
------------------------------------------------------------
------------------------------------------------------------
-------EFDYVILGAGAA------------GCVLANR----------------------
---LSA-D---------------------PTK-----RVLLLEAGN-DGSQ---------
------------------------------------------DIRVRMPAAAVKLFK-SE
-LDWDFSTSPDE-----AL-PGN-EVYL-----CRGK-----------------------
-TLGGSSCTN---------------------------VMLYHRGSAADYK----------
---------SWEDA---GAAGWGADDVLPYYRAAFDY-DEG-------------------
ASEFHGE---GGPISVEEVRYQNP-LSR--------------------AFLAAA-G----
----R-LGFRR-SFDFNDWSTPQD-------------GFGR-------------------
----FKVT-QKKGERVSTASAYL---SPI-AES----------REN-LLVATGAFVTKLG
VEGGTS----------------------SPSVASVHFLTG--------------EHKDQP
QTVRIA-----EGGEALL------------CAGA-----VQSPQILMLSGIGPREHLEEV
GIPLVMDAPAVGEGLQDHAAVLVSH----------AC----TKRV----SLTDK-IRL--
--------PR-STKP-----------NPLALLQWLLRKR--GP----LTSV---------
ACDHGG---------------FVNTDP--AA----------------------HPQPDLQ
-------------------L---RFIAARAISPSGMSTLV-KMGAG---A------A-L-
-PSG---FTTQLL-TARP-----------HSS-G-----------RVRLSSADPLA-K--
----PRIEGLYLSEG-KEGDDDLKTLREGIK-----------------------------
---LSRRL--H--------------------------------------------AESAF
DE-YRGEELYPGPEMQ-----TDAQLD---------------------------------
------------------------------------------------------------
------------------------------------------------------------
------------------------------------------------------------
------------------------------------------------------------
------------------------------------------------------------
------------------------------------------------------------
------------------------------------------------------------
------------------------------------------------------------
------------------------------------------------------------
------------------------------------------------------------
------------------------------------------------------------
------------------------------------------------------------
-------------------------------------
>54889508
------------------------------------------------------------
------------------------------------------------------------
------------------------------------------------------------
------------------------------------------------------------
------------------------------------------------------------
------------------------------------------------------------
------------------------------------------------------------
------------------------------------------------------------
------------------------------------------------------------
--------------------------IRPAT--------------VADAKA---------
---AAECEWDFIIVGGGTA------------GCVLANR----------------------
---LSA-S---------------------GEK-----RVLLLEAGSSKSLS---------
------------------------------------------SLMFRIPAGVLGLFL-SE
-HDWAFQSSGQK-----KA-ANR-EIYC-----ARGK-----------------------
-VLGGSSAIN---------------------------VLLYNRGNAADYD----------
---------LWETH--YGCAGWGAETVLPYFVKNQND-HSGL---------------AGK
NPQYHGT---GGLWSTDHVRYQNV-LSR--------------------TFLAAC-G----
----M-LGMGQ-NDDFNDWSKSQT-------------GAGR-------------------
----FLVS-QSNGARCCAATSHL---AA--ALG----------RPN-LTVLTGVYARKLN
ISN--------------------------NSCTGVQFCMG-------N------WDSTQT
FDARTA-----ADGEVVC------------TGGA-----VQTPQLLMLSGVGPKAHLAEH
GIPVVVDLPAVGENLQDQPAGVVSY----------GTCRTSRRGLCRTGSLPTK-ASL--
--------PR-AT-P-----------GCLARCIRTRARN--GS----LPAV---------
GSRRPA---------------VTTARS--S------------------------QSGMRR
-------------------L---R--VSNSVFWRRVRSLR-T-AWG---P------S-R-
-PSGRRRIILTAS-ASRPS---------RRDR-GAAGASSSAPQPRRTDRSSAPED-R--
----PILDYGWLNDE------DRKTLREGLR-----------------------------
---LARRI--A--------------------------------------------KTSAF
DQ-YRAEEVFPGKAIE-----TDAEIDEYLDQS--VHSANALVGTCRMGPD---------
--AH------DT--------------VVDS-ALRVH-GVAGLRIAD----ASV----FPQ
L------PG----GQSG----APTVMVAERASEF--------------------------
------------------------------------------------------------
------------------------------------------------------------
------------------------------------------------------------
------------------------------------------------------------
------------------------------------------------------------
------------------------------------------------------------
------------------------------------------------------------
------------------------------------------------------------
------------------------------------------------------------
------------------------------------------------------------
-------------------------------------
>52837172
------------------------------------------------------------
------------------------------------------------------------
------------------------------------------------------------
------------------------------------------------------------
------------------------------------------------------------
------------------------------------------------------------
------------------------------------------------------------
------------------------------------------------------------
------------------------------------------------------------
------------------------------------------------------------
------------------------------------------------------------
------------------------------------------------------------
------------------------------------------------------------
----------------------R-GVYL-----CRGK-----------------------
-VLGGSSAVN---------------------------VALYTRGSKTDYD----------
---------AWEHE--FGCVGWASNDVLPLFKRTEDD-LTGC---------------AAV
NPECHAM---GGEWAVEHVRYQNP-LSK--------------------LFLQAC-K----
----Q-ARLPE-NDDFNDWSKSQE-------------GAGR-------------------
----FPVS-SRRGVRVHAASALL---AP--ALADN--------TRK-LMVLTGAFVRKIL
LDK--------------------------QVAQGVQFSA-----------------DGIV
HTARLA-----PGGEVLL------------TGGA-----VHSPHLLMLSGIGPKEELQRH
GIDVLHDLPGVGENLQDQPAAVVSF----------EC-PKNKRGI----SVTSK-IRI--
--------PH-TTLP-----------HPGPALEWLLRKT--GP----LCST---------
GCDHGG---------------FFRTSA--AS--------------------QDCPCPDLQ
-------------------L---RFLAARAVTADGMGSFT-KFRDI---T------D-H-
-PDG---FSFQSV-AVRP-----------KSR-G-----------RVVLASADPEA-K--
----PVIMTNYLTDP-----QDFATIREGIR-----------------------------
---LGRRL--A--------------------------------------------EQPAF
GE-VLGPEVFPGTHVQ-----SDMELDAYISDS--MHTANAIVGTCRMGPL---------
--DG-A----ES--------------VVDP-NMRVI-GTMNLRICD----ASI----MPK
L------PG----GQAG----ACTVMIAERAAEIL-------------------------
------------------------------------------------------------
------------------------------------------------------------
------------------------------------------------------------
------------------------------------------------------------
------------------------------------------------------------
------------------------------------------------------------
------------------------------------------------------------
------------------------------------------------------------
------------------------------------------------------------
------------------------------------------------------------
-------------------------------------
>83998391
------------------------------------------------------------
------------------------------------------------------------
------------------------------------------------------------
------------------------------------------------------------
------------------------------------------------------------
------------------------------------------------------------
------------------------------------------------------------
------------------------------------------------------------
------------------------------------------------------------
------------------------------------------------------------
------------------------------------------------------------
------------------------------------------------------------
------------------------------------------------------------
------------------------------------------------------------
---------N---------------------------VCLHHRGSAQDYD----------
---------DW------GVPGWKSSDVLPFFKASQKD-MTDR------------------
SPEFHGK---DGDWVMDDVRYQNP-LSK--------------------LFLEVG-A----
----K-AGLGT-NDDFNNWSRPQD-------------GVGR-------------------
----FQVS-EVNGERCNGANAFL---SK--AIK----------RKN-CEVRTGTMVRRIN
FDA-------------------------SKTATGVTYDLM-------G------DDTMKA
FDAKLN-----KGGEVIV------------TAGA-----IASPQLLMCSGIGPADHLKDH
GIPVVHDNPSVGKNLQDHPAAVVSF----------KT-P--KKGV----SVTSK-LRV--
--------FG-F--T-----------NPLPVFQWLLLKT--GL----LTST---------
GCDHGA---------------FVRTSA--SV----------------------KGQPDLQ
-------------------I---RFLAAKSLGPDGMTTFT-QFRNS---R------S-H-
-EDG---YSFQSV-ACRP-----------KSK-G-----------CIRLVSSNTHI-K--
----PQIDGGYLSDA-----ADLKTLREGIK-----------------------------
---LGRQL--G--------------------------------------------NRPEW
GE-YLGEEVYPGIDVQ-----SDEEIDEYIKNS--VHTANALTGTCKMGIG---------
--KG-------A--------------VVSP-DLKVL-GVNGVRVAD----SST----IPI
I------PG----GQTA----TPTVMIAERAAAFL-------------------------
------------------------------------------------------------
------------------------------------------------------------
------------------------------------------------------------
------------------------------------------------------------
------------------------------------------------------------
------------------------------------------------------------
------------------------------------------------------------
------------------------------------------------------------
------------------------------------------------------------
------------------------------------------------------------
-------------------------------------
>45636988
------------------------------------------------------------
------------------------------------------------------------
------------------------------------------------------------
------------------------------------------------------------
------------------------------------------------------------
------------------------------------------------------------
------------------------------------------------------------
------------------------------------------------------------
------------------------------------------------------------
------------------------------------------------------------
-------------VGGGTA------------GCVLANR----------------------
---LSA-S---------------------GEK-----RVLLLEAGSAKSLA---------
------------------------------------------SLMFRIPAGVLGLFL-SE
-HDWAFQSCAQK-----QA-HNR-QIYC-----ARGK-----------------------
-VLGGSSAIN---------------------------VLLYNRGDAADYD----------
---------LWETK--YGCEGWGAKNVLPYFVKNQDD-RSGL---------------AAK
NPKYHGS---GGTWSTDQVRYQNV-LSR--------------------KFLEAC-E----
----K-LGISK-NDDFNDWSKSQT-------------GAGR-------------------
----FLVS-ERNGARCCAATAYL---AP--ALG----------RSN-LTVLSGVYARKLC
ISN--------------------------NECTGVQFCVN-------DFFGGSSSSASAT
FEARTA-----AGGEVVC------------AGGA-----MQTPQILMLSGVGPKAHLKEH
GIPLVADLPAVGENLQDQPAGVVSF----------SV-KKECKGM----SSSSH-ARL--
--------PG-TVYP-----------DPRVVLQWLTMRR--GV----LTST---------
GCDHGA---------------FVSLAN--E------------------------TSPQLQ
-------------------L---RFLATRAVTADGMGSFT-TFRKT---P------N-H-
-PDG---FSIQAI-AARP-----------RCR-G-----------RITLRSAAPED-R--
----PILDYGWLNDE------DRATLREGMR-----------------------------
---LGRRL--AKTAAFDQYRAEEVFPGEAVQTDGWLHDEDRATLREGMRLGRRLLKTAAF
DQ-YRAEEVFPGEAVQ-----TDAELDEYLDQS--VHSANALVGTCRMGPN---------
--AR------DA--------------VVDS-KLRVH-GVKRLRIAD----ASV----FPQ
L------PG----GQSG----ASTVMVAERA-----------------------------
------------------------------------------------------------
------------------------------------------------------------
------------------------------------------------------------
------------------------------------------------------------
------------------------------------------------------------
------------------------------------------------------------
------------------------------------------------------------
------------------------------------------------------------
------------------------------------------------------------
------------------------------------------------------------
-------------------------------------
>5364493
------------------------------------------------------------
------------------------------------------------------------
------------------------------------------------------------
------------------------------------------------------------
------------------------------------------------------------
------------------------------------------------------------
------------------------------------------------------------
------------------------------------------------------------
------------------------------------------------------------
------------------------------------------------------------
------EEWDYIILGAGAA------------GCTLANR----------------------
---LTE-D---------------------PSI-----RVLVLEAGD-DASN---------
------------------------------------------DLKVRIPAMLIKVLR-SE
-MDWNFETEPDD-----AG-TPH-GVYL-----CRGK-----------------------
-TLGGSTCAN---------------------------VQLYHRGTETDYK----------
---------SW------GAVGWGPKDVLPYFRKSESY-HGG-------------------
ADKYHGA---DGPITVSQVPYFNP-LSA--------------------IFFDAM-G----
----E-LGHRR-THDFNDWSSPQE-------------GFGR-------------------
----YSVT-QRNGERISAANTYL---KQ--ARG----------RPN-LVVRTGAHVSRLL
LEGAA-----------------------DLTTTGVSYLQ-----------------SGNE
KAAKLA-----AGGEVLL------------AAGA-----VQSPQILMLSGIGPRAHLEDH
GIQVRKEVDGVGQGLQDHPAVLVSF----------ES----KLAC----SLTDH-IRL--
--------WG-TSLP-----------NPLTLLNWFVRGK--GA----LTTV---------
ACEQGG---------------FFRTTP--DK-----------------------PQPDLQ
-------------------M---RFLPERSMSPDGMNSLQ-KMGSG---A------I-A-
-KSG---FTFQCL-ACRP-----------QAR-G-----------RVRLRDANPLS-K--
----PLVEGLYLSQG----SSDLATLREGIK-----------------------------
---LGRRV--C--------------------------------------------QTKAF
EG-VRGEELYPGADVV-----SDEAIESYVRNT--IHSANALVGSCRMGAA---------
--AD--------------------------------------------------------
------------------------------------------------------------
------------------------------------------------------------
------------------------------------------------------------
------------------------------------------------------------
------------------------------------------------------------
------------------------------------------------------------
------------------------------------------------------------
------------------------------------------------------------
------------------------------------------------------------
------------------------------------------------------------
------------------------------------------------------------
-------------------------------------
>45105939
------------------------------------------------------------
------------------------------------------------------------
------------------------------------------------------------
------------------------------------------------------------
------------------------------------------------------------
------------------------------------------------------------
------------------------------------------------------------
------------------------------------------------------------
------------------------------------------------------------
------------------------------------------------------------
------------------------------------------------------------
------------------------------------------------------------
------------------------------------------------------------
------------------------------------------------------------
------------------------------------------------------------
------------------------------------------------------------
------------------------------------------------------------
------------------------------------------------------------
------------------------------------------------------------
------------------------------------------------------------
-----------------------------------------------------------F
GIECVAHVPGVGQNLQDQPAVVVSS----------PV-KREFEGK----SITDQ-IYS--
--------VR-GNI------------RKRALLSWIMFGK--GP----LTST---------
GCDRGA---------------MVRTSA--AQ----------------------GHLPDLQ
-------------------M---RFVPGMALDPDGVSTYT-RFGNF---KKEGR--K-W-
-PSG---VTFQVV-ATRA-----------AGK-G-----------QVSLKSDDPFD-S--
----PLIVPGYLTDR---DGRDMATLKNGIE-----------------------------
---LARKI--A--------------------------------------------STGTM
SS-VLDGELFPGADVS-----TPAAVEEYIRKT--IHSSNALVGTCRMGTA---------
--AE-N----GD--------------VVDQ-DLKIF-GLEGIRVVD----ASV----IPI
I------PG----GQTG----APTVMIAERAADMM-------------------------
------------------------------------------------------------
------------------------------------------------------------
------------------------------------------------------------
------------------------------------------------------------
------------------------------------------------------------
------------------------------------------------------------
------------------------------------------------------------
------------------------------------------------------------
------------------------------------------------------------
------------------------------------------------------------
-------------------------------------
>9288719
------------------------------------------------------------
------------------------------------------------------------
------------------------------------------------------------
------------------------------------------------------------
------------------------------------------------------------
------------------------------------------------------------
------------------------------------------------------------
------------------------------------------------------------
------------------------------------------------------------
------------------------------------------------------------
-------------------------------G----------------------------
------------------------------------------------------------
------------------------------------------------------------
------------------------------------------------------------
------------------------------------------------------------
------------------------------------------------------------
DSLYHSK---GGEFAVDEVRYQNP-LSK--------------------KFLQAC-G----
----E-LGFPA-NDDFNNWSRSQE-------------GYGR-------------------
----YEVT-ERDGSRCSTATAFL---DP--VKR----------RNN-LHILTETMVHKLI
FND-------------------------NKKVIGVEIDH-----------------DGEK
KVVGLS-----SNGEVLL------------AGGA-----INSPQLLMLSGIGPKEHLQEH
HIPIVVDRPGVGSNLQDHPAAVVSY----------AC-KPEYDGI----SVTSK-IRI--
--------KG-TKFS-----------NPKVLLQWLMKRS--GP----LTST---------
GCDHGG---------------FFKSNS--QV-----------------------EDPDIQ
-------------------L---RFLSAQALSADGMSTFT-EYKNS---A------G-H-
-PDG---FSLQSI-ACRA-----------HSR-G-----------YVRLSSSHPCS-K--
----PIIEGCHLSDE-----RDVYTLREGIK-----------------------------
---LSRKL--A--------------------------------------------EAPAL
AQ-YKAEEVYPGKHIC-----SDDEIDDYIRNT--VHTSNALVGTCRMGRE---------
--DD-P----NA--------------VVDG-ELKVI-GVSGLRVID----ASI----MPK
I------PG----GQTS----APTIMIAEKAADLL-------------------------
------------------------------------------------------------
------------------------------------------------------------
------------------------------------------------------------
------------------------------------------------------------
------------------------------------------------------------
------------------------------------------------------------
------------------------------------------------------------
------------------------------------------------------------
------------------------------------------------------------
------------------------------------------------------------
-------------------------------------
>105170748
------------------------------------------------------------
------------------------------------------------------------
------------------------------------------------------------
------------------------------------------------------------
------------------------------------------------------------
------------------------------------------------------------
------------------------------------------------------------
------------------------------------------------------------
------------------------------------------------------------
------------------------------------------------------------
------------------------------------------------------------
------------------------------------------------------------
------------------------------------------------------------
------------------------------------------------------------
-------------------------------------------GEAT-------------
-------------E--FGCVGWGSNDVLPLFKRTEDD-LTGC---------------AET
NPEYHAM---GGEWSVEHVRYQNP-LSR--------------------LFLKAC-M----
----Q-AGLPM-NDDFNDWNKSQE-------------GAGR-------------------
----FPVS-SRRGVRVHAANALL---AP--ALADK--------TRK-LTVLTGAFVRKIL
LEK--------------------------QAVQGVQFSA-----------------DGIV
HTARLA-----PGGEVLL------------TGGA-----VHSPHLLMLSGIGPKEELERH
GIDVLHNLPGVGENLQDQPAAVVSF----------EC-PRTQRGI----SVTSR-IRI--
--------PH-TTLP-----------HPGPALEWLFQKT--GP----LCST---------
GCDHGG---------------FFRTRA--AP--------------------QDCPSPDLQ
-------------------M---RFLAARAVTADGMGSFT-KFRDI---T------D-H-
-PDG---FSFQSI-AVRP-----------KSR-G-----------KVALASADPEA-K--
----PIIMTNYLTDP-----QDFATIREGIR-----------------------------
---LGRRL--A--------------------------------------------EQPSF
AE-VLGPEVFPGTHVQ-----SDMELDAYISDS--MHTANALVGTCRMGPL---------
--DG-A----MS--------------VVDP-NMRVI-GTMNLRICD----ASV----MPK
L------PG----GQSG----ACTIMIAERAAEIL-------------------------
------------------------------------------------------------
------------------------------------------------------------
------------------------------------------------------------
------------------------------------------------------------
------------------------------------------------------------
------------------------------------------------------------
------------------------------------------------------------
------------------------------------------------------------
------------------------------------------------------------
------------------------------------------------------------
-------------------------------------
>59821895
------------------------------------------------------------
------------------------------------------------------------
------------------------------------------------------------
------------------------------------------------------------
------------------------------------------------------------
------------------------------------------------------------
------------------------------------------------------------
------------------------------------------------------------
------------------------------------------------------------
------------------------------------------------------------
------------------------------------------------------------
------------------------------------------------------------
---------------------------------------------IRIPTGVLHLFQHPQ
-YDWYFNTSNEK-----KT-AGR-GIYL-----CRGK-----------------------
-VLGGSSCLN---------------------------VLLYGRGNAHDYD----------
---------LWGSE--FGLTDWVASKVLPYFKRTEGD-RSGL---------------AEK
DPKHHSK---DGEWGVDHVRYQNV-MSK--------------------CFLQAC-D----
----E-LGLPA-NEDFNNWDRNQE-------------GAGR-------------------
----FHVS-ERNGMRCSSASALL---AP--AQADK--------SRS-LTVLCGASVSKIL
FDT-------------------------RNSATGVKFTC-----------------GGTI
QNARLK-----HGGEVIV------------TLGA-----IQSPQLLMISGIGPKAHLESH
NIATISDRAGVGENLRDHPAANVSY----------QC-PDSKRGI----SPTSKAFFI--
--------MG-KKLP-----------NPAWLWEWVTRKS--GP----LTSP---------
GCDHGG---------------FFRTSE--AT--------------------QEKNSPDLQ
-------------------M---RFLAVRAVTADGMNSVA-KFRDV---Q------N-H-
-PDG---FSFQNI-AARP-----------HSV-G-----------RVRLGSSSMAD-H--
----PVVEGNYLSDP-----RDVATLREGLK-----------------------------
---LSRRL--A--------------------------------------------KQDAF
KD-FVGHEVFPGPEVK-----TDEQLDAYISES--VHTANALVGTCRMGRS---------
--DD-P----LA--------------VCDS-EMRVL-GVHNLRVCD----ASV----M-Q
L------PG----CQTG----APTVMIAERAA----------------------------
------------------------------------------------------------
------------------------------------------------------------
------------------------------------------------------------
------------------------------------------------------------
------------------------------------------------------------
------------------------------------------------------------
------------------------------------------------------------
------------------------------------------------------------
------------------------------------------------------------
------------------------------------------------------------
-------------------------------------
>115918384
------------------------------------------------------------
------------------------------------------------------------
------------------------------------------------------------
------------------------------------------------------------
------------------------------------------------------------
------------------------------------------------------------
------------------------------------------------------------
------------------------------------------------------------
------------------------------------------------------------
------------------------------------------------------------
------------------------------------------------------------
------------------------------------------------------------
------------------------------------------------------------
------------------------------------------------------------
------------------------------------------------------------
-------------------------DVLPHFLRSEDD-QTDN---------------WKT
DKKHHAT---GGEWAVDHVRYQNP-LSK--------------------LFLEAC-E----
----Q-AGIKK-NDDFNNWARPQE-------------GAGR-------------------
----FTVS-QRNGTRCESAVAFL---AP--AVADS--------SRS-LKVLAGTMVNKIN
FDD-------------------------SAAATGVQFNV-----------------GGFD
HVARLA-----PRGEVVL------------AAGA-----LHSPHLLMLSGVGPKAHLQEH
NIPVIADLPGVGKNLQDHPAAVVSY----------QC-PASKKGI----SVTSK-LRI--
--------GG-TTLP-----------DPRPMIQWLLFRT--GP----LTST---------
GCDHGA---------------FVKTSA--AT----------------------DKNPDLQ
-------------------L---RFLAARAVSADGMGTFA-SFKKT---T------N-H-
-PDG---FSLQSI-AARP-----------GSR-G-----------RVLLTSADPAD-K--
----PVVEGNYLTDK-----KDVATIRAGLK-----------------------------
---LSRKI--A--------------------------------------------EQPAF
KE-HISHEVFPGPHVK-----TDAQLDAYIADS--VHTANALVGTCRMGEV---------
--TD-P----ET--------------VCDS-EMRVK-GVSRLRICD----ASI----MPA
L------PG----GQSG----ACVVMIAERAADMIMG-----------------------
------------------------------------------------------------
------------------------------------------------------------
------------------------------------------------------------
------------------------------------------------------------
------------------------------------------------------------
------------------------------------------------------------
------------------------------------------------------------
------------------------------------------------------------
------------------------------------------------------------
------------------------------------------------------------
-------------------------------------
>82879934
------------------------------------------------------------
------------------------------------------------------------
------------------------------------------------------------
------------------------------------------------------------
------------------------------------------------------------
------------------------------------------------------------
------------------------------------------------------------
------------------------------------------------------------
------------------------------------------------------------
------------------------------------------------------------
------------------------------------------------------------
------------------------------------------------------------
------------------------------------------------------------
------------------------------------------------------------
------------------------------------------------------------
------------------------------------------------------------
---YHGA---GGHYYVSETPYQNT-LCK--------------------SFLEVC-S----
----Q-MGLAN-NPDFNDWGRPQE-------------GYGR-------------------
----FHVA-QKQGERCSAASGYL---AA--AEG----------RGN-LEVRSEVHITNVA
MDG--------------------------GKARGVAYRDK----------------AGQD
VVAELA-----EGGEVIM------------ASGA-----IGTPQVLMLSGIGPGAHLRDM
GIGTAVDLPGVGQNLQDHPAAVVSY----------KT----EKK----------------
---------------------------------XXXXXX--XX----XTTP---------
GCDHGG---------------FFQTRE--GA---------------------DAGAPDLQ
-------------------V---RFVPAHASAPDGVATYT-KFGSNWGGA------Q-F-
-DSG---FSFQPI-AVRP-----------QSR-G-----------SLRLASADPAA-K--
----PVISTGYLTDP-----ADLQTLISGVR-----------------------------
---LARDM--A--------------------------------------------AQGPL
AA-LSDSETYPGKAVQ-----TDEDLVEYLRST--AHSANAVVGTCAMGAD---------
--PG-A----GA--------------VVDS-SLRVF-GVPNLRVVD----ASV----IPK
L------PG----GQTA----APVVMIAEKAAEMILG-----------------------
------------------------------------------------------------
------------------------------------------------------------
------------------------------------------------------------
------------------------------------------------------------
------------------------------------------------------------
------------------------------------------------------------
------------------------------------------------------------
------------------------------------------------------------
------------------------------------------------------------
------------------------------------------------------------
-------------------------------------
>101139983
------------------------------------------------------------
------------------------------------------------------------
------------------------------------------------------------
------------------------------------------------------------
------------------------------------------------------------
------------------------------------------------------------
------------------------------------------------------------
------------------------------------------------------------
------------------------------------------------------------
------------------------------------------------------------
------------------------------------------------------------
------------------------------------------------------------
------------------------------------------------------------
------------------------------------------------------------
------------------------------------------------------------
------------------------------------------------------------
-------------LAVQDVPYQNL-LSK--------------------AFLKAA-G----
----Q-MGFRA-NSDFNDWSAPQE-------------GFGR-------------------
----YKVM-QRDGERCSAQSSFL---AL--AKG----------RTN-LCVRTGAHVTRLV
ATGGTA----------------------EPRVTGVEFTFT---------------DGSEV
HMVRLA-----PGGEALL------------CAGS-----IQSPQLLMLSGIGPCAHLEEK
GIRVVKDLPGVGEGLQDHPAVLVAY----------ES----TKKV----CLTDD-IKL--
--------FG-TGMT-----------NPLTTARWLLARK--GP----LTSV---------
ACDHGG---------------FFRTTP--DL-----------------------EQPDLQ
-------------------V---RFVPALAQSPSGMSTLV-KYSQG---G------S-M-
-KSG---FSTQLI-ACRP-----------RSS-G-----------RVRLRDSHHHT-K--
----PLLEDVYLSAE---GDDDVKALREGIK-----------------------------
---LARKL--V--------------------------------------------DTEAF
DN-FRGKEVYPGAAVR-----TNEQIDAYIRSS--IHSANALTSSCRMGAA---------
--SD-P----MA--------------VLDP-ELRVR-GVRGLRVVD----ASA----MPQ
I------IG----GQTC----APTLMLAEKAADMILSK----------------------
------------------------------------------------------------
------------------------------------------------------------
------------------------------------------------------------
------------------------------------------------------------
------------------------------------------------------------
------------------------------------------------------------
------------------------------------------------------------
------------------------------------------------------------
------------------------------------------------------------
------------------------------------------------------------
-------------------------------------
>76460653
------------------------------------------------------------
------------------------------------------------------------
------------------------------------------------------------
------------------------------------------------------------
------------------------------------------------------------
------------------------------------------------------------
------------------------------------------------------------
------------------------------------------------------------
------------------------------------------------------------
------------------------------------------------------------
------------------------------------------------------------
------------------------------------------------------------
------------------------------------------------------------
------------------------------------------------------------
------------------------------------------------------------
----------W------GVPGWGSEEVLEYFKKSESN-N------------------AVS
NDKFHGM---AGPYEVDSVQYTNP-LID--------------------TFLGAS-V----
----K-AGYSR-NSDFNDWDRGQE-------------GVGP-------------------
----FHVA-QRNGVRSSAASAYL---SQ--VEK----------DNR-LEVVTGAHVKKLA
IDAG------------------------KKEARGVHYAK-----------------DGME
VFTSIK-----EGGEVIL------------AAGS-----VGSPHILMLSGIGPRQHLEEH
GIDCVADLP-VGENLQDHPAAVVSY----------TV----DQKV----SVTDE-FKL--
--------FGISNIP-----------NPWPMIKYLLTGT--GP----MTSV---------
GCDYGG---------------FFKTSE--SK-----------------------EDPDLQ
-------------------M---RFIGALAQSPLGISNYK-EYARKW--L------S-WP
SPSG---FTFQNI-CVRP-----------KSK-G-----------YVRLQSANYGD-K--
----PVISTGYLSSE-----EDIESIRNGIK-----------------------------
---LSRKL--G--------------------------------------------ASEEF
KK-YNPVELYPGPEVQ-----TDEEIDEYIRNS--AHSGNALVGSCRMGVD---------
--SK------TA--------------VVDP-ELRVM-GFKSLRVID----SSV----MPV
L------PG----GQTC----SSTLMIAEKGADLL-------------------------
------------------------------------------------------------
------------------------------------------------------------
------------------------------------------------------------
------------------------------------------------------------
------------------------------------------------------------
------------------------------------------------------------
------------------------------------------------------------
------------------------------------------------------------
------------------------------------------------------------
------------------------------------------------------------
-------------------------------------
>100911230
------------------------------------------------------------
------------------------------------------------------------
------------------------------------------------------------
------------------------------------------------------------
------------------------------------------------------------
------------------------------------------------------------
------------------------------------------------------------
------------------------------------------------------------
------------------------------------------------------------
------------------------------------------------------------
------------------------------------------------------------
------------------------------------------------------------
------------------------------------------------------------
------------------------------------------------------------
----GSSSTN---------------------------VMLYHRGTPADYE----------
---------KWEAK---GAKGWGPTDVLPYFRKAEDN-AEG-------------------
PSEYHGV---DGPMPVQDVPYVNP-LSR--------------------AFLAAA-GQLGF
RRQRQ-LGFRR-QHDFNDWSTPQE-------------GFGR-------------------
----FKVT-QNNGERCSAWNAYG---AA--AAA----------RPN-LTVRAGCHVTKIA
LDK-------------------------AVVATGVEYKQ-----------------GGEA
CTAKLA-----KGGEVLL------------CAS---------------------------
GVPVRKDIPGVGVGLQDHPTALVSY----------GS----SQKV----SITDE-IRL--
--------FG-SGYP-----------NPLTTLKWLLFRR--GA----LTTV---------
ACEFGG---------------FFRTPRA-ET-----------------------AQADLQ
-------------------V---RFIAARAMNADGISTLE-KFGAG---A------R-T-
-TPG---YTAQVV-AIRP-----------KSE-G-----------RVRMQSADPFD-K--
----PVLENVHLSND-----EDVRTLREGIK-----------------------------
---LGRRL--L--------------------------------------------QAESF
DE-YRTEEVYPGAKVQ-----SDADIDAFVRSS--VHSANALTSSCRMGSE---------
--KD-P----MA--------------VLDA-ELRLR-GVGALRVID----ASV----FPQ
I------PG----GQTC----APTIMVAEKAADLL-------------------------
------------------------------------------------------------
------------------------------------------------------------
------------------------------------------------------------
------------------------------------------------------------
------------------------------------------------------------
------------------------------------------------------------
------------------------------------------------------------
------------------------------------------------------------
------------------------------------------------------------
------------------------------------------------------------
-------------------------------------
>116464801
------------------------------------------------------------
------------------------------------------------------------
------------------------------------------------------------
------------------------------------------------------------
------------------------------------------------------------
------------------------------------------------------------
------------------------------------------------------------
------------------------------------------------------------
------------------------------------------------------------
------------------------------------------------------------
------------------------------------------------------------
------------------------------------------------------------
------------------------------------------------------------
------------------------------------------------------------
---------N---------------------------VQLYHRGTETDYK----------
---------SWEQA---GAVGWGPNDVLPYFRKSECY-FGG-------------------
ADKYHGA---DGPMTVSQVPYFNP-LSA--------------------IFFEAV------
--------------------APQE-------------GFGR-------------------
----YSVT-QRNGERISTANTYL---KQ--AQG----------RPN-LDVRTGAHVSRLL
LEGAT-----------------------DLATTGVSYMQ-----------------SGNE
KAAKLA-----AGGEVLL------------AAGA-----VQSPQILMLSGIGPRAHLEDH
GIKVRKEVDGVGQGLQDHPAVLVSY----------ES----KRAC----SLTDH-IRL--
--------WG-TALP-----------NPLTLLNWFVRGK--GA----LATV---------
ACEQGG---------------FFRTTP--DK-----------------------AQPDLQ
-------------------L---RFVPERSMSPDGMNSLQ-KMGSG---A------I-A-
-KSG---FTFQLL-ACRP-----------QAR-G-----------RVRLRDANPLS-K--
----PLVEGLYLSQG----SSDLATLREGIK-----------------------------
---LGRRV--C--------------------------------------------QTKAF
EG-VRGEELYPGADVV-----SDEAIESYVRTT--IHSANALTGSCRMGTA---------
--AD-P----LA--------------VLDP-QLRVR-GVRALRVVD----ASA----MPR
I------PG----GQTC----APTIMIAEKAADVI-------------------------
------------------------------------------------------------
------------------------------------------------------------
------------------------------------------------------------
------------------------------------------------------------
------------------------------------------------------------
------------------------------------------------------------
------------------------------------------------------------
------------------------------------------------------------
------------------------------------------------------------
------------------------------------------------------------
-------------------------------------
>71800925
------------------------------------------------------------
------------------------------------------------------------
------------------------------------------------------------
------------------------------------------------------------
------------------------------------------------------------
------------------------------------------------------------
------------------------------------------------------------
------------------------------------------------------------
------------------------------------------------------------
------------------------------------------------------------
------------------------------------------------------------
------------------------------------------------------------
------------------------------------------------------------
------------------------------------------------------------
---GGSSSLN---------------------------VLLYHRGNAEDYN----------
---------KWKDS--FGLQGWAASDVLPFFKRSQDD-HTGL---------------SKS
NPEHHST---GGEWSVDHVRWQSK-LSK--------------------CFLEAC-A----
----E-AGYPL-NSDFNNWDVPQE-------------GAGR-------------------
----FTVS-QRNGSRCSAASALL---VP--ALKDV--------TRH-LKVLCGAMARRIV
FKD-------------------------GREAAGVEFSV-----------------GNVV
HIARLA-----PNGEVLM------------AGGA-----IQSPQLLMLSGIGPSGHLAEH
GISEVANLPGVGSNLQDHPAANLAY----------EC-PLSQKGI----SPTSSCIFI--
--------WG-KKFP-----------NPWWILQWLVFKT--GP----LTSP---------
GCDHGG---------------FFST-------------------------------PDLQ
-------------------V---RFLPARAVTADGMNSFV-TFRKT---N------S-I-
-PDG---FSFQSI-AVRP-----------QSR-G-----------RIRLASSSPLD-K--
----PVIEGNYLADK-----RDIATIREGLR-----------------------------
---LSRRL--A--------------------------------------------QQPAF
AE-FLGPEKFPGPDVQ-----TDEQLDAYIADT--VHTANAVVGTCRMGRC---------
--ED-P----MA--------------VCDA-ELRVM-STKGLRVCD----ASV----MPT
L------PG----AQPG----AATVMIAERAAEMI-------------------------
------------------------------------------------------------
------------------------------------------------------------
------------------------------------------------------------
------------------------------------------------------------
------------------------------------------------------------
------------------------------------------------------------
------------------------------------------------------------
[truncated: 178,680 more chars]
