# Supplementary material
Source: MDPI journal article supplement (https://www.mdpi.com/2073-4344/10/9/1072)
Supplement: s1 [file s1 › catalysts-923799-sm-r1/Supplementary Dataset 9.txt]

Supplementary Dataset 9.

Frequencies of amino acids at the positions corresponding to those in CvFAP. First column shows the amino acid. Second column includes the frequencies of gaps in the multiple sequence alignment. Third column shows the frequencies of amino acids without considering gaps.

CvFAP amino acid S 61
-	78.41	0.00
R	12.33	57.14
P	1.76	8.16
L	1.32	6.12
A	1.32	6.12
S	0.88	4.08
V	0.88	4.08
N	0.44	2.04
Y	0.44	2.04
M	0.44	2.04
D	0.44	2.04
I	0.44	2.04
F	0.44	2.04
T	0.44	2.04

CvFAP amino acid A 62
-	78.41	0.00
A	11.45	53.06
R	3.52	16.33
S	2.64	12.24
G	1.32	6.12
Q	1.32	6.12
K	0.88	4.08
V	0.44	2.04

CvFAP amino acid S 63
-	78.41	0.00
T	8.37	38.78
S	3.08	14.29
G	2.20	10.20
A	2.20	10.20
L	1.32	6.12
P	1.32	6.12
Q	0.88	4.08
D	0.88	4.08
K	0.44	2.04
H	0.44	2.04
V	0.44	2.04

CvFAP amino acid A 64
-	94.27	0.00
A	2.64	46.15
G	1.32	23.08
S	0.44	7.69
V	0.44	7.69
Y	0.44	7.69
Q	0.44	7.69

CvFAP amino acid V 65
-	94.71	0.00
V	2.20	41.67
L	1.32	25.00
A	0.88	16.67
G	0.44	8.33
I	0.44	8.33

CvFAP amino acid E 66
-	95.15	0.00
E	1.76	36.36
R	1.76	36.36
V	0.44	9.09
D	0.44	9.09
S	0.44	9.09

CvFAP amino acid D 67
-	94.27	0.00
D	2.20	38.46
G	1.32	23.08
L	0.88	15.38
T	0.44	7.69
K	0.44	7.69
E	0.44	7.69

CvFAP amino acid I 68
-	92.95	0.00
L	2.64	37.50
I	2.20	31.25
R	0.88	12.50
H	0.44	6.25
G	0.44	6.25
A	0.44	6.25

CvFAP amino acid R 69
-	92.95	0.00
Q	2.64	37.50
R	1.76	25.00
A	0.88	12.50
C	0.44	6.25
G	0.44	6.25
D	0.44	6.25
K	0.44	6.25

CvFAP amino acid K 70
-	92.51	0.00
S	3.52	47.06
K	1.76	23.53
G	1.32	17.65
R	0.44	5.88
P	0.44	5.88

CvFAP amino acid V 71
-	86.34	0.00
V	7.93	58.06
S	1.76	12.90
A	1.76	12.90
I	0.88	6.45
L	0.44	3.23
P	0.44	3.23
R	0.44	3.23

CvFAP amino acid L 72
-	84.58	0.00
R	3.52	22.86
A	2.64	17.14
S	2.64	17.14
L	2.20	14.29
V	1.76	11.43
G	0.88	5.71
E	0.88	5.71
Q	0.44	2.86
F	0.44	2.86

CvFAP amino acid S 73
-	71.81	0.00
A	4.85	17.19
R	3.52	12.50
S	3.52	12.50
V	3.52	12.50
K	2.64	9.37
T	1.76	6.25
H	1.32	4.69
M	1.32	4.69
I	1.32	4.69
Q	1.32	4.69
E	0.88	3.12
P	0.88	3.12
L	0.44	1.56
C	0.44	1.56
G	0.44	1.56

CvFAP amino acid D 74
-	70.93	0.00
A	11.89	40.91
L	2.64	9.09
R	2.20	7.58
D	2.20	7.58
V	2.20	7.58
T	1.76	6.06
K	1.76	6.06
E	1.32	4.55
G	0.88	3.03
I	0.88	3.03
Q	0.88	3.03
S	0.44	1.52

CvFAP amino acid S 75
-	66.96	0.00
A	10.13	30.67
D	5.29	16.00
S	4.85	14.67
L	3.08	9.33
V	2.20	6.67
E	2.20	6.67
N	1.32	4.00
G	0.88	2.67
T	0.88	2.67
H	0.88	2.67
P	0.88	2.67
K	0.44	1.33

CvFAP amino acid S 76
-	62.11	0.00
A	15.86	41.86
S	10.57	27.91
E	3.52	9.30
P	2.20	5.81
V	1.76	4.65
D	1.32	3.49
G	0.88	2.33
T	0.88	2.33
L	0.44	1.16
Q	0.44	1.16

CvFAP amino acid S 77
-	61.23	0.00
A	9.25	23.86
S	6.17	15.91
T	4.85	12.50
Q	4.85	12.50
N	2.64	6.82
K	2.64	6.82
R	1.76	4.55
E	1.32	3.41
G	0.88	2.27
D	0.88	2.27
L	0.88	2.27
I	0.88	2.27
F	0.44	1.14
M	0.44	1.14
P	0.44	1.14
H	0.44	1.14

CvFAP amino acid P 78
-	60.35	0.00
A	14.10	35.56
P	10.13	25.56
K	4.85	12.22
S	2.20	5.56
E	2.20	5.56
G	1.32	3.33
N	1.32	3.33
R	0.88	2.22
T	0.88	2.22
D	0.88	2.22
Q	0.44	1.11
I	0.44	1.11

CvFAP amino acid V 79
-	52.86	0.00
V	19.38	41.12
A	17.18	36.45
P	2.64	5.61
T	2.20	4.67
I	1.76	3.74
S	1.32	2.80
L	0.88	1.87
D	0.88	1.87
E	0.44	0.93
G	0.44	0.93

CvFAP amino acid A 80
-	51.98	0.00
A	25.11	52.29
S	5.29	11.01
V	3.96	8.26
T	3.96	8.26
G	2.20	4.59
P	1.76	3.67
I	1.32	2.75
R	1.32	2.75
E	1.32	2.75
K	0.88	1.83
N	0.44	0.92
L	0.44	0.92

CvFAP amino acid G 81
-	51.54	0.00
S	12.78	26.36
A	9.69	20.00
G	8.81	18.18
E	3.52	7.27
Q	3.52	7.27
T	2.64	5.45
R	2.20	4.55
K	2.20	4.55
D	1.32	2.73
N	1.32	2.73
P	0.44	0.91

CvFAP amino acid Q 82
-	44.49	0.00
E	15.86	28.57
G	7.05	12.70
Q	5.73	10.32
K	4.85	8.73
D	4.85	8.73
T	3.96	7.14
S	3.52	6.35
C	3.52	6.35
A	3.08	5.56
R	1.76	3.17
N	0.88	1.59
I	0.44	0.79

CvFAP amino acid K 83
-	39.65	0.00
E	23.79	39.42
K	10.13	16.79
T	8.37	13.87
S	7.49	12.41
Q	3.08	5.11
P	2.20	3.65
G	1.76	2.92
R	1.32	2.19
A	1.32	2.19
H	0.44	0.73
N	0.44	0.73

CvFAP amino acid Y 84
-	33.04	0.00
Y	31.72	47.37
W	24.67	36.84
F	9.25	13.82
V	0.88	1.32
H	0.44	0.66

CvFAP amino acid D 85
D	63.44	92.90
-	31.72	0.00
N	3.08	4.52
K	0.88	1.29
H	0.88	1.29

CvFAP amino acid Y 86
Y	59.03	85.35
-	30.84	0.00
F	8.81	12.74
A	1.32	1.91

CvFAP amino acid I 87
I	63.00	89.38
-	29.52	0.00
V	6.17	8.75
M	0.88	1.25
X	0.44	0.62

CvFAP amino acid L 88
I	51.98	73.75
-	29.52	0.00
L	12.78	18.12
V	4.85	6.88
S	0.88	1.25

CvFAP amino acid V 89
V	43.61	61.49
-	29.07	0.00
A	13.66	19.25
L	5.73	8.07
C	3.96	5.59
I	3.08	4.35
T	0.88	1.24

CvFAP amino acid G 90
G	70.04	98.76
-	29.07	0.00
K	0.44	0.62
R	0.44	0.62

CvFAP amino acid G 91
G	64.32	90.68
-	29.07	0.00
A	5.73	8.07
S	0.88	1.24

CvFAP amino acid G 92
G	70.48	98.16
-	28.19	0.00
D	0.88	1.23
S	0.44	0.61

CvFAP amino acid T 93
T	38.33	53.05
-	27.75	0.00
A	16.74	23.17
L	11.89	16.46
V	1.76	2.44
I	1.32	1.83
C	0.88	1.22
R	0.88	1.22
S	0.44	0.61

CvFAP amino acid A 94
A	67.40	92.73
-	27.31	0.00
G	2.20	3.03
S	1.76	2.42
R	0.88	1.21
C	0.44	0.61

CvFAP amino acid A 95
G	60.79	82.63
-	26.43	0.00
S	8.37	11.38
A	4.41	5.99

CvFAP amino acid C 96
C	71.37	97.01
-	26.43	0.00
S	0.88	1.20
T	0.44	0.60
A	0.44	0.60
L	0.44	0.60

CvFAP amino acid V 97
V	59.91	81.44
-	26.43	0.00
L	7.93	10.78
I	2.20	2.99
T	2.20	2.99
A	1.32	1.80

CvFAP amino acid L 98
L	70.48	95.81
-	26.43	0.00
I	1.32	1.80
M	0.88	1.20
V	0.88	1.20

CvFAP amino acid A 99
A	73.13	99.40
-	26.43	0.00
Q	0.44	0.60

CvFAP amino acid N 100
N	44.93	61.08
-	26.43	0.00
E	8.81	11.98
D	7.93	10.78
K	7.05	9.58
R	2.20	2.99
A	1.32	1.80
S	1.32	1.80

CvFAP amino acid R 101
R	68.72	93.41
-	26.43	0.00
K	4.41	5.99
Q	0.44	0.60

CvFAP amino acid L 102
L	73.57	100.00
-	26.43	0.00

CvFAP amino acid S 103
S	44.93	61.45
-	26.87	0.00
T	20.26	27.71
L	5.73	7.83
V	1.32	1.81
M	0.44	0.60
A	0.44	0.60

CvFAP amino acid A 104
A	42.29	57.14
-	25.99	0.00
E	15.86	21.43
Q	3.96	5.36
K	3.08	4.17
S	2.64	3.57
D	2.64	3.57
T	0.88	1.19
R	0.88	1.19
V	0.88	1.19
M	0.44	0.60
G	0.44	0.60

CvFAP amino acid D 105
D	41.85	62.50
-	33.04	0.00
S	8.81	13.16
N	7.05	10.53
G	5.29	7.89
A	1.32	1.97
Q	0.88	1.32
K	0.88	1.32
H	0.44	0.66
E	0.44	0.66

CvFAP amino acid G 106
G	30.40	41.07
P	26.43	35.71
-	25.99	0.00
A	5.73	7.74
K	4.41	5.95
E	3.08	4.17
T	2.64	3.57
S	0.88	1.19
L	0.44	0.60

CvFAP amino acid S 107
-	28.19	0.00
S	17.62	24.54
E	11.89	16.56
T	7.93	11.04
G	7.93	11.04
D	7.49	10.43
N	7.05	9.82
A	4.85	6.75
K	3.08	4.29
R	3.08	4.29
Q	0.88	1.23

CvFAP amino acid K 108
K	48.02	64.12
-	25.11	0.00
N	4.85	6.47
V	4.41	5.88
H	3.52	4.71
T	3.08	4.12
S	2.64	3.53
I	2.20	2.94
R	1.76	2.35
A	1.76	2.35
F	1.32	1.76
Y	0.88	1.18
L	0.44	0.59

CvFAP amino acid R 109
R	40.09	53.22
K	25.11	33.33
-	24.67	0.00
S	5.29	7.02
N	3.08	4.09
Q	0.44	0.58
T	0.44	0.58
H	0.44	0.58
E	0.44	0.58

CvFAP amino acid V 110
V	66.96	89.41
-	25.11	0.00
I	7.93	10.59

CvFAP amino acid L 111
L	74.89	99.42
-	24.67	0.00
V	0.44	0.58

CvFAP amino acid V 112
V	47.58	63.16
-	24.67	0.00
L	23.79	31.58
M	3.52	4.68
I	0.44	0.58

CvFAP amino acid L 113
L	70.04	92.98
-	24.67	0.00
I	4.41	5.85
V	0.88	1.17

CvFAP amino acid E 114
E	75.33	100.00
-	24.67	0.00

CvFAP amino acid A 115
A	73.57	97.09
-	24.23	0.00
P	0.88	1.16
S	0.88	1.16
D	0.44	0.58

CvFAP amino acid G 116
G	75.77	100.00
-	24.23	0.00

CvFAP amino acid P 117
-	24.23	0.00
S	22.91	30.23
G	9.69	12.79
P	8.81	11.63
R	8.81	11.63
D	7.93	10.47
T	6.17	8.14
K	4.85	6.40
Q	2.20	2.91
A	1.76	2.33
E	1.32	1.74
N	0.88	1.16
V	0.44	0.58

CvFAP amino acid D 118
-	24.23	0.00
D	18.94	25.00
S	12.78	16.86
P	11.89	15.70
A	9.69	12.79
K	9.25	12.21
R	4.41	5.81
G	4.41	5.81
E	2.20	2.91
T	1.32	1.74
N	0.88	1.16

CvFAP amino acid N 119
D	32.60	43.02
-	24.23	0.00
G	9.25	12.21
A	8.81	11.63
N	7.93	10.47
S	7.49	9.88
P	3.08	4.07
K	2.20	2.91
L	0.88	1.16
R	0.88	1.16
E	0.88	1.16
H	0.88	1.16
I	0.44	0.58
Q	0.44	0.58

CvFAP amino acid T 120
Y	26.43	34.88
-	24.23	0.00
S	11.89	15.70
L	6.61	8.72
D	5.73	7.56
T	5.73	7.56
F	4.85	6.40
P	2.64	3.49
E	2.20	2.91
A	1.32	1.74
K	1.32	1.74
G	1.32	1.74
H	1.32	1.74
R	1.32	1.74
Q	1.32	1.74
W	0.88	1.16
V	0.44	0.58
M	0.44	0.58

CvFAP amino acid S 121
-	24.23	0.00
N	17.18	22.67
S	13.66	18.02
D	12.33	16.28
K	8.37	11.05
A	7.93	10.47
E	5.29	6.98
R	4.41	5.81
G	3.52	4.65
T	2.64	3.49
Q	0.44	0.58

CvFAP amino acid R 122
-	24.23	0.00
L	21.15	27.91
K	10.57	13.95
M	9.25	12.21
P	9.25	12.21
R	7.93	10.47
T	6.61	8.72
F	2.64	3.49
I	2.64	3.49
Y	1.32	1.74
A	1.32	1.74
W	0.88	1.16
G	0.88	1.16
S	0.44	0.58
X	0.44	0.58
Q	0.44	0.58

CvFAP amino acid D 123
-	24.23	0.00
M	12.33	16.28
K	9.25	12.21
R	8.81	11.63
Y	8.81	11.63
E	7.93	10.47
L	7.93	10.47
F	7.05	9.30
I	5.29	6.98
D	2.64	3.49
N	2.64	3.49
H	1.76	2.33
P	0.44	0.58
S	0.44	0.58
V	0.44	0.58

CvFAP amino acid V 124
V	34.36	44.32
I	27.31	35.23
-	22.47	0.00
F	7.49	9.66
L	3.08	3.98
T	1.76	2.27
A	1.32	1.70
M	1.32	1.70
E	0.88	1.14

CvFAP amino acid K 125
R	39.65	50.85
K	23.35	29.94
-	22.03	0.00
A	4.41	5.65
H	3.08	3.95
Q	2.20	2.82
N	1.76	2.26
S	0.88	1.13
W	0.88	1.13
T	0.88	1.13
G	0.44	0.56
V	0.44	0.56

CvFAP amino acid I 126
I	53.74	68.54
-	21.59	0.00
V	17.62	22.47
M	3.96	5.06
A	1.32	1.69
T	1.32	1.69
L	0.44	0.56

CvFAP amino acid P 127
P	78.85	100.00
-	21.15	0.00

CvFAP amino acid A 128
A	60.79	77.97
-	22.03	0.00
V	4.85	6.21
L	4.41	5.65
T	2.20	2.82
S	2.20	2.82
W	1.32	1.69
M	0.88	1.13
I	0.44	0.56
K	0.44	0.56
G	0.44	0.56

CvFAP amino acid A 129
G	50.66	64.61
-	21.59	0.00
A	20.70	26.40
M	4.85	6.18
K	1.32	1.69
Y	0.44	0.56
N	0.44	0.56

CvFAP amino acid I 130
I	26.43	34.09
V	26.43	34.09
-	22.47	0.00
L	16.30	21.02
F	7.49	9.66
A	0.88	1.14

CvFAP amino acid T 131
L	35.68	46.02
-	22.47	0.00
T	11.89	15.34
V	11.01	14.20
G	6.17	7.95
I	5.29	6.82
P	4.85	6.25
A	2.20	2.84
S	0.44	0.57

CvFAP amino acid R 132
R	36.12	46.59
K	25.11	32.39
-	22.47	0.00
G	7.05	9.09
Y	3.52	4.55
H	2.64	3.41
Q	0.88	1.14
D	0.88	1.14
S	0.88	1.14
N	0.44	0.57

CvFAP amino acid L 133
L	62.56	80.68
-	22.47	0.00
V	10.13	13.07
I	2.64	3.41
T	2.20	2.84

CvFAP amino acid F 134
F	67.40	86.93
-	22.47	0.00
L	8.37	10.80
I	0.88	1.14
C	0.44	0.57
V	0.44	0.57

CvFAP amino acid R 135
R	28.19	35.75
K	27.75	35.20
-	21.15	0.00
L	7.49	9.50
Q	6.17	7.82
G	4.41	5.59
A	2.20	2.79
N	2.20	2.79
F	0.44	0.56

CvFAP amino acid S 136
S	61.23	77.65
-	21.15	0.00
H	4.85	6.15
N	4.85	6.15
T	3.08	3.91
G	2.64	3.35
P	1.76	2.23
D	0.44	0.56

CvFAP amino acid P 137
-	21.15	0.00
E	21.15	26.82
D	17.62	22.35
P	10.13	12.85
K	7.49	9.50
V	6.17	7.82
A	4.85	6.15
T	3.96	5.03
R	3.08	3.91
Q	2.20	2.79
G	0.88	1.12
S	0.44	0.56
N	0.44	0.56
L	0.44	0.56

CvFAP amino acid L 138
Y	22.91	28.89
-	20.70	0.00
L	18.06	22.78
H	8.37	10.56
M	7.49	9.44
F	7.49	9.44
K	6.17	7.78
I	2.64	3.33
R	1.76	2.22
W	1.76	2.22
V	1.32	1.67
N	0.88	1.11
C	0.44	0.56

CvFAP amino acid D 139
D	77.97	98.33
-	20.70	0.00
R	0.44	0.56
Y	0.44	0.56
P	0.44	0.56

CvFAP amino acid W 140
W	77.09	97.22
-	20.70	0.00
Y	1.32	1.67
R	0.44	0.56
F	0.44	0.56

CvFAP amino acid N 141
N	22.03	27.93
-	21.15	0.00
D	17.62	22.35
Q	12.78	16.20
A	10.13	12.85
G	7.49	9.50
S	2.20	2.79
K	1.76	2.23
H	1.76	2.23
Y	1.76	2.23
T	0.44	0.56
I	0.44	0.56
E	0.44	0.56

CvFAP amino acid L 142
F	42.29	53.93
-	21.59	0.00
Y	12.33	15.73
L	11.01	14.04
H	10.57	13.48
M	1.76	2.25
T	0.44	0.56

CvFAP amino acid F 143
E	24.23	30.90
-	21.59	0.00
T	17.62	22.47
Q	11.01	14.04
F	6.61	8.43
S	3.96	5.06
Y	2.64	3.37
A	2.20	2.81
N	2.20	2.81
R	1.76	2.25
H	1.32	1.69
V	1.32	1.69
M	1.32	1.69
K	1.32	1.69
L	0.44	0.56
D	0.44	0.56

CvFAP amino acid S 144
S	37.89	48.31
T	37.00	47.19
-	21.59	0.00
A	1.76	2.25
V	1.32	1.69
K	0.44	0.56

CvFAP amino acid E 145
S	22.91	29.21
-	21.59	0.00
E	14.54	18.54
K	7.05	8.99
C	6.61	8.43
A	5.73	7.30
G	4.41	5.62
V	3.52	4.49
T	3.52	4.49
R	3.08	3.93
Q	2.64	3.37
L	1.76	2.25
D	0.88	1.12
I	0.88	1.12
H	0.44	0.56
P	0.44	0.56

CvFAP amino acid L 146
-	21.59	0.00
P	18.06	23.03
G	17.18	21.91
N	11.01	14.04
A	9.69	12.36
S	7.05	8.99
R	3.96	5.06
T	3.52	4.49
K	3.52	4.49
L	3.08	3.93
E	0.88	1.12
D	0.44	0.56

CvFAP amino acid Q 147
E	31.28	39.89
-	21.59	0.00
Q	21.59	27.53
S	7.49	9.55
D	6.61	8.43
V	3.96	5.06
G	2.20	2.81
T	1.76	2.25
A	1.32	1.69
N	0.88	1.12
R	0.44	0.56
L	0.44	0.56
K	0.44	0.56

CvFAP amino acid E 148
K	24.67	31.46
-	21.59	0.00
A	13.66	17.42
P	9.25	11.80
E	9.25	11.80
T	5.73	7.30
Q	4.85	6.18
S	3.52	4.49
D	3.08	3.93
R	1.32	1.69
N	1.32	1.69
V	0.88	1.12
G	0.44	0.56
I	0.44	0.56

CvFAP amino acid Q 149
-	22.03	0.00
A	18.94	24.29
G	15.42	19.77
Q	11.89	15.25
N	6.17	7.91
K	5.73	7.34
H	4.41	5.65
E	3.96	5.08
R	2.20	2.82
D	2.20	2.82
S	1.76	2.26
P	1.76	2.26
T	1.32	1.69
V	0.88	1.13
F	0.44	0.56
C	0.44	0.56
L	0.44	0.56

CvFAP amino acid L 150
-	21.59	0.00
L	19.82	25.28
T	16.74	21.35
C	12.78	16.29
A	11.45	14.61
V	5.73	7.30
P	5.29	6.74
G	3.08	3.93
I	1.76	2.25
S	0.88	1.12
K	0.44	0.56
M	0.44	0.56

CvFAP amino acid A 151
-	26.87	0.00
N	21.15	28.92
A	13.66	18.67
S	12.33	16.87
T	7.05	9.64
G	4.85	6.63
H	3.96	5.42
D	2.64	3.61
V	1.76	2.41
Q	1.76	2.41
E	1.76	2.41
F	0.44	0.60
L	0.44	0.60
K	0.44	0.60
P	0.44	0.60
Y	0.44	0.60

CvFAP amino acid E 152
G	32.60	41.81
-	22.03	0.00
D	10.57	13.56
N	10.13	12.99
H	8.37	10.73
E	4.41	5.65
A	3.52	4.52
Q	2.64	3.39
S	2.64	3.39
P	1.76	2.26
K	0.88	1.13
L	0.44	0.56

CvFAP amino acid R 153
R	59.03	74.03
-	20.26	0.00
H	5.29	6.63
K	3.52	4.42
E	3.52	4.42
D	2.64	3.31
Q	2.20	2.76
S	1.76	2.21
G	0.88	1.10
N	0.88	1.10

CvFAP amino acid Q 154
G	29.52	36.61
-	19.38	0.00
N	14.10	17.49
E	12.33	15.30
Q	11.01	13.66
S	6.61	8.20
R	2.64	3.28
P	1.76	2.19
K	1.32	1.64
A	0.88	1.09
M	0.44	0.55

CvFAP amino acid I 155
V	40.09	49.73
I	33.92	42.08
-	19.38	0.00
L	5.73	7.10
F	0.44	0.55
M	0.44	0.55

CvFAP amino acid Y 156
Y	62.56	77.60
-	19.38	0.00
F	14.98	18.58
H	1.32	1.64
N	1.32	1.64
M	0.44	0.55

CvFAP amino acid M 157
L	63.44	78.69
-	19.38	0.00
C	7.05	8.74
V	3.08	3.83
F	2.64	3.28
M	2.20	2.73
I	1.32	1.64
W	0.44	0.55
Q	0.44	0.55

CvFAP amino acid A 158
C	36.12	44.81
A	20.26	25.14
-	19.38	0.00
P	11.89	14.75
Q	10.57	13.11
V	1.32	1.64
L	0.44	0.55

CvFAP amino acid R 159
R	80.18	99.45
-	19.38	0.00
L	0.44	0.55

CvFAP amino acid G 160
G	79.74	98.91
-	19.38	0.00
I	0.44	0.55
A	0.44	0.55

CvFAP amino acid R 161
K	70.04	86.89
-	19.38	0.00
R	8.81	10.93
M	0.88	1.09
Q	0.44	0.55
A	0.44	0.55

CvFAP amino acid L 162
V	47.58	58.70
-	18.94	0.00
A	8.81	10.87
T	7.93	9.78
L	6.61	8.15
G	5.29	6.52
M	1.32	1.63
I	1.32	1.63
C	0.88	1.09
S	0.88	1.09
Q	0.44	0.54

CvFAP amino acid L 163
L	75.77	93.48
-	18.94	0.00
M	1.32	1.63
V	1.32	1.63
I	1.32	1.63
E	0.88	1.09
T	0.44	0.54

CvFAP amino acid G 164
G	81.06	99.46
-	18.50	0.00
P	0.44	0.54

CvFAP amino acid G 165
G	81.06	98.92
-	18.06	0.00
L	0.44	0.54
A	0.44	0.54

CvFAP amino acid S 166
S	81.50	99.46
-	18.06	0.00
T	0.44	0.54

CvFAP amino acid S 167
S	71.37	87.10
-	18.06	0.00
T	5.73	6.99
H	3.96	4.84
G	0.44	0.54
V	0.44	0.54

CvFAP amino acid A 168
C	39.65	48.39
A	21.15	25.81
-	18.06	0.00
S	13.66	16.67
V	3.08	3.76
L	2.64	3.23
G	1.76	2.15

CvFAP amino acid T 169
T	46.70	57.30
-	18.50	0.00
I	11.89	14.59
L	11.45	14.05
A	6.61	8.11
V	2.64	3.24
M	1.32	1.62
S	0.88	1.08

CvFAP amino acid N 170
N	76.21	92.51
-	17.62	0.00
S	4.85	5.88
F	0.88	1.07
E	0.44	0.53

CvFAP amino acid A 171
V	66.08	80.21
-	17.62	0.00
A	14.98	18.18
I	0.44	0.53
T	0.44	0.53
L	0.44	0.53

CvFAP amino acid T 172
L	31.72	38.50
M	21.15	25.67
-	17.62	0.00
T	11.45	13.90
C	7.49	9.09
Q	6.17	7.49
A	3.52	4.28
F	0.44	0.53
G	0.44	0.53

CvFAP amino acid L 173
L	82.38	99.47
-	17.18	0.00
I	0.44	0.53

CvFAP amino acid Y 174
Y	67.84	81.91
-	17.18	0.00
H	10.57	12.77
V	3.52	4.26
N	0.44	0.53
S	0.44	0.53

CvFAP amino acid H 175
H	39.65	47.62
N	28.63	34.39
-	16.74	0.00
T	4.41	5.29
M	4.41	5.29
Q	1.76	2.12
G	1.76	2.12
L	1.32	1.59
F	0.88	1.06
R	0.44	0.53

CvFAP amino acid R 176
R	82.82	99.47
-	16.74	0.00
V	0.44	0.53

CvFAP amino acid G 177
G	83.70	100.00
-	16.30	0.00

CvFAP amino acid A 178
S	33.04	39.47
T	20.26	24.21
-	16.30	0.00
D	16.30	19.47
N	7.05	8.42
A	4.41	5.26
E	1.32	1.58
H	0.44	0.53
K	0.44	0.53
C	0.44	0.53

CvFAP amino acid A 179
A	55.51	66.67
-	16.74	0.00
P	9.25	11.11
K	6.61	7.94
E	6.17	7.41
R	1.76	2.12
S	1.76	2.12
T	1.32	1.59
N	0.44	0.53
D	0.44	0.53

CvFAP amino acid G 180
A	29.52	35.45
-	16.74	0.00
N	9.25	11.11
Q	7.93	9.52
R	7.05	8.47
H	6.61	7.94
G	6.17	7.41
T	5.73	6.88
E	3.52	4.23
S	3.08	3.70
K	2.64	3.17
D	0.88	1.06
M	0.44	0.53
L	0.44	0.53

CvFAP amino acid D 181
D	82.82	100.00
-	17.18	0.00

CvFAP amino acid Y 182
Y	79.74	96.28
-	17.18	0.00
F	3.08	3.72

CvFAP amino acid D 183
D	55.07	66.49
-	17.18	0.00
N	11.89	14.36
K	5.73	6.91
E	5.29	6.38
A	3.08	3.72
Q	0.88	1.06
T	0.44	0.53
R	0.44	0.53

CvFAP amino acid A 184
A	18.94	22.75
-	16.74	0.00
S	14.98	17.99
L	13.66	16.40
D	9.25	11.11
G	6.61	7.94
K	5.29	6.35
E	3.08	3.70
N	3.08	3.70
T	2.20	2.65
R	2.20	2.65
V	2.20	2.65
Q	0.88	1.06
I	0.88	1.06

CvFAP amino acid W 185
W	83.70	100.00
-	16.30	0.00

CvFAP amino acid G 186
G	65.20	78.31
-	16.74	0.00
K	5.73	6.88
N	4.85	5.82
E	2.64	3.17
Q	1.76	2.12
D	1.76	2.12
S	0.44	0.53
A	0.44	0.53
M	0.44	0.53

CvFAP amino acid V 187
V	22.91	27.81
C	19.38	23.53
-	17.62	0.00
A	17.62	21.39
L	11.01	13.37
I	6.61	8.02
D	3.08	3.74
N	1.32	1.60
M	0.44	0.53

CvFAP amino acid E 188
P	25.55	30.21
-	15.42	0.00
E	12.78	15.10
V	10.13	11.98
D	8.81	10.42
K	7.05	8.33
Q	6.17	7.29
A	4.85	5.73
T	3.96	4.69
R	2.20	2.60
L	1.32	1.56
N	0.88	1.04
G	0.44	0.52
C	0.44	0.52

CvFAP amino acid G 189
G	75.33	89.06
-	15.42	0.00
S	3.08	3.65
N	2.20	2.60
D	2.20	2.60
E	1.76	2.08

CvFAP amino acid W 190
W	84.14	99.48
-	15.42	0.00
L	0.44	0.52

CvFAP amino acid S 191
G	42.29	50.26
-	15.86	0.00
S	14.98	17.80
K	10.57	12.57
T	5.73	6.81
A	5.29	6.28
R	2.20	2.62
V	1.76	2.09
H	0.44	0.52
N	0.44	0.52
D	0.44	0.52

CvFAP amino acid S 192
A	39.65	46.88
S	25.11	29.69
-	15.42	0.00
P	14.10	16.67
G	5.73	6.77

CvFAP amino acid E 193
K	18.06	21.24
E	15.42	18.13
-	14.98	0.00
S	12.33	14.51
D	12.33	14.51
A	9.69	11.40
Q	3.08	3.63
N	3.08	3.63
T	2.64	3.11
R	2.20	2.59
G	2.20	2.59
C	1.76	2.07
V	1.76	2.07
I	0.44	0.52

CvFAP amino acid D 194
D	54.63	63.92
E	16.30	19.07
-	14.54	0.00
N	3.52	4.12
Q	3.08	3.61
S	2.20	2.58
T	1.76	2.06
K	1.76	2.06
A	0.88	1.03
G	0.88	1.03
P	0.44	0.52

CvFAP amino acid V 195
V	73.13	85.57
-	14.54	0.00
M	5.73	6.70
A	2.64	3.09
L	2.64	3.09
C	0.88	1.03
I	0.44	0.52

CvFAP amino acid L 196
L	84.58	98.97
-	14.54	0.00
V	0.44	0.52
M	0.44	0.52

CvFAP amino acid S 197
P	55.07	64.43
-	14.54	0.00
D	9.25	10.82
E	5.73	6.70
K	5.29	6.19
S	2.20	2.58
G	2.20	2.58
R	1.76	2.06
H	1.32	1.55
N	1.32	1.55
Q	0.88	1.03
A	0.44	0.52

CvFAP amino acid W 198
Y	51.10	59.79
-	14.54	0.00
W	11.89	13.92
F	9.25	10.82
H	3.96	4.64
L	3.96	4.64
A	1.76	2.06
S	1.32	1.55
D	1.32	1.55
C	0.44	0.52
T	0.44	0.52

CvFAP amino acid F 199
F	80.18	93.33
-	14.10	0.00
Y	4.85	5.64
A	0.44	0.51
M	0.44	0.51

CvFAP amino acid V 200
K	45.37	52.82
-	14.10	0.00
V	14.10	16.41
R	11.89	13.85
L	6.17	7.18
I	3.08	3.59
M	2.64	3.08
N	1.32	1.54
T	0.88	1.03
S	0.44	0.51

CvFAP amino acid Q 201
K	39.21	45.64
R	25.55	29.74
-	14.10	0.00
A	4.85	5.64
Q	3.52	4.10
L	3.08	3.59
E	3.08	3.59
M	2.20	2.56
S	1.32	1.54
N	0.88	1.03
D	0.44	0.51
Y	0.44	0.51
H	0.44	0.51
C	0.44	0.51
T	0.44	0.51

CvFAP amino acid A 202
S	37.44	43.81
A	20.70	24.23
-	14.54	0.00
T	11.89	13.92
N	5.73	6.70
V	3.08	3.61
M	1.76	2.06
H	1.76	2.06
C	1.32	1.55
L	0.88	1.03
X	0.44	0.52
G	0.44	0.52

CvFAP amino acid E 203
E	64.76	75.77
Q	18.50	21.65
-	14.54	0.00
R	0.44	0.52
H	0.44	0.52
G	0.44	0.52
X	0.44	0.52
F	0.44	0.52

CvFAP amino acid T 204
D	35.68	41.97
-	14.98	0.00
N	12.78	15.03
K	8.37	9.84
S	7.93	9.33
T	5.73	6.74
G	5.29	6.22
C	3.08	3.63
H	2.64	3.11
A	1.76	2.07
R	1.32	1.55
X	0.44	0.52

CvFAP amino acid N 205
D	30.40	35.57
N	29.52	34.54
-	14.54	0.00
Y	12.78	14.95
F	3.52	4.12
Q	3.08	3.61
C	2.64	3.09
H	1.32	1.55
A	0.88	1.03
R	0.44	0.52
X	0.44	0.52
G	0.44	0.52

CvFAP amino acid A 206
-	14.54	0.00
H	12.78	14.95
R	12.33	14.43
Q	8.37	9.79
L	7.93	9.28
A	7.49	8.76
S	5.73	6.70
M	4.41	5.15
K	4.41	5.15
N	4.41	5.15
E	3.96	4.64
V	3.08	3.61
T	3.08	3.61
G	2.64	3.09
P	1.32	1.55
C	0.88	1.03
F	0.88	1.03
I	0.44	0.52
X	0.44	0.52
Y	0.44	0.52
D	0.44	0.52

CvFAP amino acid D 207
T	23.79	29.67
-	19.82	0.00
D	15.42	19.23
S	9.25	11.54
G	7.93	9.89
R	6.61	8.24
E	3.96	4.95
V	3.96	4.95
A	2.20	2.75
K	1.76	2.20
Q	1.76	2.20
I	1.32	1.65
P	0.88	1.10
N	0.88	1.10
X	0.44	0.55

CvFAP amino acid F 208
G	56.83	70.88
-	19.82	0.00
F	4.41	5.49
D	3.52	4.40
A	2.64	3.30
P	2.64	3.30
E	2.20	2.75
L	1.76	2.20
I	1.32	1.65
K	0.88	1.10
T	0.88	1.10
V	0.88	1.10
R	0.44	0.55
H	0.44	0.55
N	0.44	0.55
X	0.44	0.55
S	0.44	0.55

CvFAP amino acid G 209
-	43.61	0.00
L	16.74	29.69
R	11.89	21.09
A	5.29	9.37
G	5.29	9.37
K	3.52	6.25
Q	2.20	3.91
C	2.20	3.91
E	1.76	3.12
H	1.76	3.12
T	1.32	2.34
N	1.32	2.34
P	0.88	1.56
I	0.44	0.78
V	0.44	0.78
D	0.44	0.78
X	0.44	0.78
F	0.44	0.78

CvFAP amino acid P 210
D	20.70	23.74
S	15.42	17.68
N	15.42	17.68
A	14.98	17.17
-	12.78	0.00
P	9.25	10.61
E	3.96	4.55
V	1.76	2.02
T	1.76	2.02
Q	1.32	1.52
K	0.88	1.01
L	0.88	1.01
G	0.44	0.51
R	0.44	0.51

CvFAP amino acid G 211
P	32.16	37.06
S	20.70	23.86
-	13.22	0.00
D	9.69	11.17
T	5.73	6.60
A	4.85	5.58
G	4.85	5.58
K	3.52	4.06
N	2.64	3.05
E	1.76	2.03
R	0.44	0.51
Q	0.44	0.51

CvFAP amino acid A 212
K	36.12	41.62
E	15.86	18.27
-	13.22	0.00
A	7.49	8.63
Q	6.61	7.61
P	5.29	6.09
R	4.85	5.58
D	2.20	2.54
H	2.20	2.54
G	1.76	2.03
M	1.32	1.52
V	1.32	1.52
L	0.88	1.02
T	0.44	0.51
S	0.44	0.51

CvFAP amino acid Y 213
Y	37.44	42.29
F	23.79	26.87
H	18.50	20.90
-	11.45	0.00
V	3.96	4.48
W	1.32	1.49
A	0.88	1.00
L	0.88	1.00
I	0.88	1.00
C	0.44	0.50
M	0.44	0.50

CvFAP amino acid H 214
H	88.11	99.50
-	11.45	0.00
R	0.44	0.50

CvFAP amino acid G 215
G	66.52	75.12
S	14.98	16.92
-	11.45	0.00
A	6.17	6.97
N	0.88	1.00

CvFAP amino acid S 216
T	21.15	23.88
K	19.38	21.89
V	18.06	20.40
-	11.45	0.00
A	9.25	10.45
S	8.81	9.95
M	3.52	3.98
Q	2.64	2.99
G	2.64	2.99
R	0.88	1.00
C	0.44	0.50
Y	0.44	0.50
N	0.44	0.50
F	0.44	0.50
E	0.44	0.50

CvFAP amino acid G 217
G	45.81	52.00
D	24.23	27.50
-	11.89	0.00
S	4.85	5.50
E	3.96	4.50
N	3.52	4.00
A	3.52	4.00
C	0.88	1.00
K	0.88	1.00
Q	0.44	0.50

CvFAP amino acid G 218
G	88.11	99.50
-	11.45	0.00
D	0.44	0.50

CvFAP amino acid P 219
P	34.80	39.50
E	22.47	25.50
-	11.89	0.00
T	6.17	7.00
D	5.29	6.00
L	4.41	5.00
H	3.96	4.50
A	3.08	3.50
M	2.64	3.00
S	1.76	2.00
N	1.32	1.50
I	0.88	1.00
Q	0.44	0.50
F	0.44	0.50
R	0.44	0.50

CvFAP amino acid M 220
W	34.36	38.81
M	20.70	23.38
Y	11.89	13.43
-	11.45	0.00
L	9.25	10.45
F	6.17	6.97
V	3.96	4.48
I	1.76	1.99
Q	0.44	0.50

CvFAP amino acid R 221
S	18.06	20.40
A	11.89	13.43
-	11.45	0.00
T	10.57	11.94
V	6.61	7.46
H	6.17	6.97
P	5.73	6.47
R	4.41	4.98
G	4.41	4.98
N	3.96	4.48
K	3.52	3.98
D	3.08	3.48
E	3.08	3.48
Q	2.20	2.49
C	2.20	2.49
I	1.32	1.49
Y	0.88	1.00
M	0.44	0.50

CvFAP amino acid V 222
V	64.32	71.92
M	11.89	13.30
-	10.57	0.00
T	9.69	10.84
S	2.64	2.96
A	0.44	0.49
I	0.44	0.49

CvFAP amino acid E 223
D	37.89	42.16
E	22.03	24.51
S	18.94	21.08
-	10.13	0.00
Q	5.73	6.37
G	2.64	2.94
N	1.32	1.47
T	0.88	0.98
A	0.44	0.49

CvFAP amino acid N 224
H	22.03	24.51
D	20.70	23.04
E	13.66	15.20
-	10.13	0.00
Q	10.13	11.27
N	9.25	10.29
P	3.96	4.41
S	3.08	3.43
A	2.20	2.45
R	1.76	1.96
T	0.88	0.98
K	0.88	0.98
X	0.44	0.49
F	0.44	0.49
Y	0.44	0.49

CvFAP amino acid P 225
V	65.64	73.04
P	14.54	16.18
-	10.13	0.00
L	3.08	3.43
A	2.20	2.45
T	1.76	1.96
Q	0.88	0.98
I	0.88	0.98
G	0.44	0.49
S	0.44	0.49

CvFAP amino acid R 226
R	56.83	63.24
P	19.38	21.57
-	10.13	0.00
Q	7.05	7.84
K	3.08	3.43
A	0.88	0.98
G	0.88	0.98
N	0.44	0.49
S	0.44	0.49
H	0.44	0.49
I	0.44	0.49

CvFAP amino acid Y 227
Y	85.46	95.10
-	10.13	0.00
R	1.32	1.47
S	1.32	1.47
C	1.32	1.47
W	0.44	0.49

CvFAP amino acid T 228
Q	47.58	52.68
T	14.10	15.61
-	9.69	0.00
V	7.05	7.80
F	4.85	5.37
E	3.96	4.39
N	2.64	2.93
D	2.20	2.44
P	1.32	1.46
K	1.32	1.46
M	0.88	0.98
A	0.88	0.98
L	0.88	0.98
I	0.88	0.98
H	0.88	0.98
S	0.44	0.49
R	0.44	0.49

CvFAP amino acid N 229
N	86.34	95.61
-	9.69	0.00
S	2.20	2.44
T	1.76	1.95

CvFAP amino acid K 230
P	51.10	56.86
V	14.10	15.69
-	10.13	0.00
E	8.81	9.80
Q	2.64	2.94
T	2.64	2.94
K	2.20	2.45
F	1.76	1.96
I	1.32	1.47
G	1.32	1.47
S	1.32	1.47
N	0.88	0.98
R	0.88	0.98
L	0.44	0.49
H	0.44	0.49

CvFAP amino acid Q 231
-	97.80	0.00
Q	1.76	80.00
K	0.44	20.00

CvFAP amino acid L 232
L	78.85	86.89
M	11.45	12.62
-	9.25	0.00
I	0.44	0.49

CvFAP amino acid H 233
S	64.32	70.87
H	11.01	12.14
-	9.25	0.00
I	6.61	7.28
T	3.08	3.40
V	2.20	2.43
C	1.76	1.94
N	0.44	0.49
Y	0.44	0.49
F	0.44	0.49
Q	0.44	0.49

CvFAP amino acid T 234
K	31.28	34.47
R	15.42	16.99
-	9.25	0.00
A	9.25	10.19
E	7.05	7.77
T	6.61	7.28
D	6.17	6.80
S	5.73	6.31
N	2.20	2.43
G	1.76	1.94
P	1.76	1.94
Q	1.76	1.94
L	0.88	0.97
H	0.88	0.97

CvFAP amino acid A 235
T	19.38	21.36
A	19.38	21.36
R	12.78	14.08
K	11.01	12.14
-	9.25	0.00
L	8.37	9.22
E	3.96	4.37
I	3.52	3.88
V	3.08	3.40
S	3.08	3.40
C	3.08	3.40
M	1.76	1.94
N	0.88	0.97
H	0.44	0.49

CvFAP amino acid F 236
F	88.55	98.05
-	9.69	0.00
Y	0.44	0.49
L	0.44	0.49
S	0.44	0.49
H	0.44	0.49

CvFAP amino acid F 237
L	58.59	64.88
F	22.03	24.39
-	9.69	0.00
V	6.17	6.83
I	3.08	3.41
M	0.44	0.49

CvFAP amino acid K 238
E	34.36	37.86
Q	11.45	12.62
A	11.01	12.14
D	11.01	12.14
K	10.13	11.17
-	9.25	0.00
R	4.85	5.34
S	3.52	3.88
G	2.64	2.91
I	0.44	0.49
T	0.44	0.49
N	0.44	0.49
P	0.44	0.49

CvFAP amino acid A 239
A	72.25	79.61
V	13.66	15.05
-	9.25	0.00
S	3.08	3.40
I	0.88	0.97
G	0.44	0.49
P	0.44	0.49

CvFAP amino acid A 240
C	37.44	41.26
A	24.67	27.18
G	13.66	15.05
-	9.25	0.00
S	7.05	7.77
V	3.96	4.37
M	3.08	3.40
T	0.44	0.49
I	0.44	0.49

CvFAP amino acid E 241
G	19.82	22.28
A	14.54	16.34
E	14.54	16.34
-	11.01	0.00
K	10.13	11.39
V	9.25	10.40
Q	4.85	5.45
D	3.52	3.96
S	3.08	3.47
Y	2.20	2.48
H	1.76	1.98
R	1.76	1.98
I	1.32	1.49
L	0.88	0.99
N	0.44	0.50
M	0.44	0.50
T	0.44	0.50

CvFAP amino acid E 242
E	29.96	33.17
Q	19.38	21.46
K	14.10	15.61
A	12.33	13.66
-	9.69	0.00
S	5.29	5.85
M	5.29	5.85
N	1.76	1.95
T	0.88	0.98
G	0.44	0.49
R	0.44	0.49
D	0.44	0.49

CvFAP amino acid V 243
A	33.04	36.41
L	22.03	24.27
M	9.69	10.68
-	9.25	0.00
V	4.85	5.34
F	4.41	4.85
S	3.08	3.40
D	2.64	2.91
Y	1.76	1.94
T	1.32	1.46
I	1.32	1.46
Q	1.32	1.46
W	1.32	1.46
R	0.88	0.97
G	0.88	0.97
C	0.44	0.49
K	0.44	0.49
N	0.44	0.49
H	0.44	0.49
E	0.44	0.49

CvFAP amino acid G 244
G	88.55	97.57
-	9.25	0.00
E	0.88	0.97
D	0.44	0.49
R	0.44	0.49
P	0.44	0.49

CvFAP amino acid L 245
L	40.09	43.96
Y	13.22	14.49
I	12.78	14.01
F	11.01	12.08
-	8.81	0.00
H	5.29	5.80
M	3.96	4.35
G	2.64	2.90
W	1.32	1.45
V	0.44	0.48
A	0.44	0.48

CvFAP amino acid T 246
P	23.35	25.60
G	18.06	19.81
R	17.18	18.84
-	8.81	0.00
S	8.81	9.66
K	6.61	7.25
A	6.61	7.25
N	3.08	3.38
T	2.64	2.90
V	2.20	2.42
E	1.32	1.45
D	0.88	0.97
Q	0.44	0.48

CvFAP amino acid P 247
R	25.55	28.02
A	13.22	14.49
-	8.81	0.00
T	7.93	8.70
K	7.05	7.73
S	6.61	7.25
L	5.73	6.28
P	5.29	5.80
Y	3.96	4.35
Q	3.52	3.86
H	3.08	3.38
N	2.20	2.42
E	1.76	1.93
M	1.76	1.93
V	0.88	0.97
F	0.88	0.97
I	0.88	0.97
G	0.44	0.48
D	0.44	0.48

CvFAP amino acid N 248
N	81.06	89.32
-	9.25	0.00
Q	3.08	3.40
T	2.64	2.91
R	1.32	1.46
V	0.88	0.97
S	0.88	0.97
K	0.88	0.97

CvFAP amino acid S 249
D	34.80	38.16
P	12.33	13.53
S	10.57	11.59
H	9.25	10.14
-	8.81	0.00
N	7.93	8.70
G	5.73	6.28
E	4.85	5.31
A	2.64	2.90
K	1.76	1.93
T	0.44	0.48
F	0.44	0.48
L	0.44	0.48

CvFAP amino acid D 250
D	90.31	99.03
-	8.81	0.00
N	0.44	0.48
E	0.44	0.48

CvFAP amino acid F 251
F	91.19	99.52
-	8.37	0.00
V	0.44	0.48

CvFAP amino acid N 252
N	91.19	99.52
-	8.37	0.00
S	0.44	0.48

CvFAP amino acid D 253
D	59.03	64.42
N	25.99	28.37
-	8.37	0.00
S	3.96	4.33
A	0.88	0.96
C	0.88	0.96
R	0.44	0.48
P	0.44	0.48

CvFAP amino acid W 254
W	91.19	99.52
-	8.37	0.00
L	0.44	0.48

CvFAP amino acid S 255
S	48.46	52.63
D	21.59	23.44
G	11.45	12.44
-	7.93	0.00
E	2.64	2.87
K	2.20	2.39
R	2.20	2.39
A	1.76	1.91
N	1.32	1.44
T	0.44	0.48

CvFAP amino acid H 256
R	38.77	41.90
K	15.86	17.14
H	13.22	14.29
A	8.81	9.52
-	7.49	0.00
T	6.61	7.14
S	2.64	2.86
Q	2.20	2.38
E	1.76	1.90
C	0.88	0.95
N	0.44	0.48
I	0.44	0.48
V	0.44	0.48
W	0.44	0.48

CvFAP amino acid D 257
P	39.65	42.86
S	16.30	17.62
G	9.25	10.00
D	8.37	9.05
K	8.37	9.05
-	7.49	0.00
E	3.52	3.81
T	3.08	3.33
N	1.76	1.90
A	0.88	0.95
R	0.44	0.48
Q	0.44	0.48
L	0.44	0.48

CvFAP amino acid H 258
Q	89.87	97.61
-	7.93	0.00
H	2.20	2.39

CvFAP amino acid A 259
E	47.14	51.20
D	20.26	22.01
T	10.13	11.00
-	7.93	0.00
A	7.93	8.61
V	2.64	2.87
S	1.76	1.91
Q	1.32	1.44
G	0.44	0.48
N	0.44	0.48

CvFAP amino acid G 260
G	92.51	100.00
-	7.49	0.00

CvFAP amino acid Y 261
F	24.67	26.67
A	24.67	26.67
V	23.79	25.71
Y	16.74	18.10
-	7.49	0.00
M	0.88	0.95
I	0.88	0.95
C	0.44	0.48
H	0.44	0.48

CvFAP amino acid G 262
G	92.51	100.00
-	7.49	0.00

CvFAP amino acid T 263
R	63.44	68.25
P	9.69	10.43
-	7.05	0.00
E	7.05	7.58
T	6.17	6.64
L	2.20	2.37
S	1.32	1.42
K	1.32	1.42
I	0.44	0.47
F	0.44	0.47
A	0.44	0.47
V	0.44	0.47

CvFAP amino acid F 264
F	81.94	88.15
Y	11.01	11.85
-	7.05	0.00

CvFAP amino acid Q 265
Q	33.48	36.02
H	14.54	15.64
K	11.89	12.80
L	9.25	9.95
-	7.05	0.00
S	6.61	7.11
A	5.29	5.69
P	3.96	4.27
F	3.52	3.79
T	2.20	2.37
R	0.88	0.95
D	0.44	0.47
C	0.44	0.47
E	0.44	0.47

CvFAP amino acid V 266
V	89.87	96.23
-	6.61	0.00
L	3.08	3.30
I	0.44	0.47

CvFAP amino acid M 267
S	44.05	47.17
T	25.99	27.83
A	13.66	14.62
-	6.61	0.00
M	5.73	6.13
Q	1.76	1.89
N	1.76	1.89
F	0.44	0.47

CvFAP amino acid Q 268
Q	57.71	61.79
E	24.67	26.42
-	6.61	0.00
T	4.41	4.72
S	2.64	2.83
H	1.32	1.42
M	1.32	1.42
A	0.44	0.47
C	0.44	0.47
L	0.44	0.47

CvFAP amino acid D 269
R	43.17	46.23
K	14.98	16.04
N	8.37	8.96
-	6.61	0.00
D	5.29	5.66
H	3.96	4.25
S	3.52	3.77
I	3.52	3.77
Q	1.76	1.89
T	1.76	1.89
E	1.32	1.42
V	1.32	1.42
L	1.32	1.42
C	1.32	1.42
M	0.88	0.94
A	0.88	0.94

CvFAP amino acid K 270
N	44.93	48.11
K	18.94	20.28
R	11.45	12.26
D	7.05	7.55
-	6.61	0.00
Q	3.52	3.77
G	2.64	2.83
H	1.76	1.89
A	1.32	1.42
E	0.88	0.94
S	0.88	0.94

CvFAP amino acid G 271
G	93.83	100.00
-	6.17	0.00

CvFAP amino acid T 272
E	36.56	38.97
V	14.54	15.49
A	14.10	15.02
R	10.57	11.27
-	6.17	0.00
T	4.85	5.16
S	3.96	4.23
Q	2.64	2.82
K	2.20	2.35
C	1.76	1.88
M	1.32	1.41
N	0.88	0.94
F	0.44	0.47

CvFAP amino acid R 273
R	93.83	100.00
-	6.17	0.00

CvFAP amino acid A 274
C	44.05	46.95
A	14.98	15.96
V	11.45	12.21
S	7.93	8.45
-	6.17	0.00
E	3.96	4.23
W	3.52	3.76
I	3.08	3.29
T	2.20	2.35
G	1.32	1.41
D	0.44	0.47
F	0.44	0.47
Q	0.44	0.47

CvFAP amino acid D 275
S	49.78	53.05
D	20.70	22.07
C	8.81	9.39
T	8.37	8.92
-	6.17	0.00
H	5.29	5.63
N	0.44	0.47
E	0.44	0.47

CvFAP amino acid M 276
A	55.07	58.69
G	15.86	16.90
T	8.37	8.92
-	6.17	0.00
M	4.85	5.16
S	3.96	4.23
P	3.96	4.23
C	1.76	1.88

CvFAP amino acid Y 277
A	74.01	78.87
Y	9.69	10.33
-	6.17	0.00
W	3.96	4.23
F	1.76	1.88
N	1.32	1.41
G	1.32	1.41
S	0.88	0.94
H	0.44	0.47
Q	0.44	0.47

CvFAP amino acid R 278
S	34.36	36.62
T	22.03	23.47
N	14.98	15.96
R	11.45	12.21
-	6.17	0.00
A	3.52	3.76
Q	1.76	1.88
D	1.32	1.41
K	1.32	1.41
L	1.32	1.41
V	0.88	0.94
Y	0.44	0.47
E	0.44	0.47

CvFAP amino acid Q 279
A	52.42	55.87
S	12.78	13.62
T	11.01	11.74
-	6.17	0.00
G	6.17	6.57
Q	5.29	5.63
M	3.96	4.23
E	1.32	1.41
V	0.44	0.47
D	0.44	0.47

CvFAP amino acid Y 280
Y	53.74	57.28
F	21.15	22.54
M	7.05	7.51
-	6.17	0.00
L	6.17	6.57
H	5.29	5.63
W	0.44	0.47

CvFAP amino acid L 281
L	86.78	92.49
-	6.17	0.00
G	3.08	3.29
M	2.64	2.82
I	0.88	0.94
V	0.44	0.47

CvFAP amino acid K 282
K	23.79	25.23
A	23.79	25.23
S	16.74	17.76
E	10.57	11.21
R	7.05	7.48
-	5.73	0.00
T	3.96	4.21
Q	2.20	2.34
D	2.20	2.34
N	1.76	1.87
G	0.88	0.93
H	0.44	0.47
P	0.44	0.47
V	0.44	0.47

CvFAP amino acid P 283
P	39.65	42.06
K	18.50	19.63
A	11.01	11.68
Q	8.37	8.88
-	5.73	0.00
S	4.85	5.14
G	4.41	4.67
D	3.08	3.27
E	2.20	2.34
L	0.88	0.93
T	0.44	0.47
R	0.44	0.47
N	0.44	0.47

CvFAP amino acid V 284
A	68.72	72.90
V	18.94	20.09
-	5.73	0.00
I	3.08	3.27
T	1.76	1.87
C	1.32	1.40
S	0.44	0.47

CvFAP amino acid L 285
L	30.84	33.02
M	14.10	15.09
R	12.78	13.68
Q	8.37	8.96
E	8.37	8.96
-	6.61	0.00
A	4.41	4.72
I	4.41	4.72
K	3.96	4.25
V	3.52	3.77
S	1.76	1.89
H	0.44	0.47
D	0.44	0.47

CvFAP amino acid G 286
G	29.96	32.08
K	21.15	22.64
A	15.42	16.51
R	10.13	10.85
-	6.61	0.00
S	4.41	4.72
N	3.96	4.25
D	3.08	3.30
E	2.20	2.36
H	1.76	1.89
Q	1.32	1.42

CvFAP amino acid R 287
R	65.64	69.95
K	7.05	7.51
D	6.61	7.04
-	6.17	0.00
S	3.96	4.23
N	3.52	3.76
T	2.64	2.82
E	2.20	2.35
G	0.88	0.94
A	0.88	0.94
C	0.44	0.47

CvFAP amino acid R 288
P	22.47	23.94
K	21.15	22.54
R	19.82	21.13
S	7.93	8.45
A	6.61	7.04
-	6.17	0.00
G	4.85	5.16
N	3.96	4.23
E	2.64	2.82
D	1.76	1.88
Q	1.32	1.41
T	1.32	1.41

CvFAP amino acid N 289
N	70.04	75.00
-	6.61	0.00
Q	5.29	5.66
S	4.41	4.72
C	3.52	3.77
R	3.08	3.30
K	3.08	3.30
I	1.32	1.42
H	1.32	1.42
P	0.44	0.47
D	0.44	0.47
V	0.44	0.47

CvFAP amino acid L 290
L	82.82	89.10
-	7.05	0.00
C	5.73	6.16
I	2.20	2.37
V	1.76	1.90
F	0.44	0.47

CvFAP amino acid Q 291
T	21.15	22.64
K	15.42	16.51
E	14.10	15.09
D	8.37	8.96
Q	7.49	8.02
-	6.61	0.00
S	6.17	6.60
V	5.73	6.13
R	4.41	4.72
H	3.52	3.77
C	2.20	2.36
A	2.20	2.36
N	0.88	0.94
I	0.44	0.47
F	0.44	0.47
L	0.44	0.47
M	0.44	0.47

CvFAP amino acid V 292
V	85.02	91.04
I	7.49	8.02
-	6.61	0.00
L	0.88	0.94

CvFAP amino acid L 293
L	35.24	37.74
R	27.75	29.72
V	18.94	20.28
-	6.61	0.00
K	2.64	2.83
M	2.20	2.36
E	2.20	2.36
Q	1.32	1.42
A	1.32	1.42
I	1.32	1.42
S	0.44	0.47

CvFAP amino acid T 294
T	58.59	62.74
S	16.30	17.45
C	7.05	7.55
-	6.61	0.00
A	4.85	5.19
R	2.64	2.83
Q	1.32	1.42
I	0.88	0.94
V	0.44	0.47
M	0.44	0.47
D	0.44	0.47
P	0.44	0.47

CvFAP amino acid G 295
G	74.89	80.19
-	6.61	0.00
E	6.17	6.60
S	5.29	5.66
N	3.08	3.30
R	1.32	1.42
I	0.88	0.94
H	0.44	0.47
Q	0.44	0.47
K	0.44	0.47
D	0.44	0.47

CvFAP amino acid A 296
A	52.42	55.87
V	17.62	18.78
T	13.66	14.55
-	6.17	0.00
S	5.29	5.63
C	3.52	3.76
M	0.44	0.47
R	0.44	0.47
I	0.44	0.47

CvFAP amino acid A 297
H	18.94	20.19
M	14.98	15.96
Y	9.25	9.86
Q	8.81	9.39
R	7.93	8.45
A	7.49	7.98
-	6.17	0.00
L	6.17	6.57
P	6.17	6.57
T	5.29	5.63
S	4.41	4.69
K	1.76	1.88
F	1.32	1.41
N	0.88	0.94
V	0.44	0.47

CvFAP amino acid V 298
V	60.79	64.79
A	18.06	19.25
-	6.17	0.00
T	5.29	5.63
I	4.41	4.69
L	3.08	3.29
C	2.20	2.35

CvFAP amino acid T 299
R	27.75	29.30
T	26.87	28.37
S	14.54	15.35
Q	7.93	8.37
-	5.29	0.00
K	5.29	5.58
E	4.85	5.12
N	3.96	4.19
L	1.32	1.40
H	1.32	1.40
G	0.44	0.47
P	0.44	0.47

CvFAP amino acid K 300
K	50.66	53.49
R	32.60	34.42
-	5.29	0.00
N	3.08	3.26
H	2.64	2.79
G	2.64	2.79
Q	2.20	2.33
S	0.44	0.47
E	0.44	0.47

CvFAP amino acid V 301
I	42.29	44.65
L	26.43	27.91
V	25.99	27.44
-	5.29	0.00

CvFAP amino acid N 302
L	19.82	21.03
N	16.74	17.76
A	12.78	13.55
D	7.05	7.48
V	7.05	7.48
T	7.05	7.48
I	6.17	6.54
-	5.73	0.00
C	3.96	4.21
S	3.08	3.27
E	2.64	2.80
H	2.20	2.34
Q	1.32	1.40
G	1.32	1.40
K	1.32	1.40
M	0.88	0.93
R	0.88	0.93

CvFAP amino acid I 303
F	39.21	41.59
I	22.91	24.30
L	21.59	22.90
-	5.73	0.00
W	3.96	4.21
M	2.64	2.80
T	1.76	1.87
V	1.76	1.87
A	0.44	0.47

CvFAP amino acid D 304
D	44.49	47.20
E	22.91	24.30
S	8.37	8.88
-	5.73	0.00
N	5.29	5.61
T	4.41	4.67
A	3.08	3.27
C	2.20	2.34
K	1.76	1.87
V	0.88	0.93
Q	0.44	0.47
G	0.44	0.47

CvFAP amino acid Q 305
G	26.87	28.37
K	16.74	17.67
E	9.69	10.23
N	8.81	9.30
A	7.49	7.91
S	7.05	7.44
D	6.17	6.51
-	5.29	0.00
Q	5.29	5.58
P	2.64	2.79
R	1.76	1.86
T	1.76	1.86
H	0.44	0.47

CvFAP amino acid A 306
-	59.47	0.00
A	11.01	27.17
G	7.93	19.57
E	5.73	14.13
S	4.85	11.96
D	4.85	11.96
P	2.20	5.43
V	1.32	3.26
N	0.88	2.17
T	0.44	1.09
L	0.44	1.09
Q	0.44	1.09
R	0.44	1.09

CvFAP amino acid A 307
-	68.28	0.00
G	6.61	20.83
S	6.17	19.44
A	4.85	15.28
T	4.41	13.89
N	2.20	6.94
Y	1.76	5.56
E	1.76	5.56
R	0.88	2.78
K	0.88	2.78
M	0.44	1.39
L	0.44	1.39
I	0.44	1.39
Q	0.44	1.39
D	0.44	1.39

CvFAP amino acid G 308
-	75.77	0.00
G	8.37	34.55
S	3.96	16.36
D	3.96	16.36
A	2.20	9.09
K	1.76	7.27
R	1.32	5.45
E	1.32	5.45
T	0.44	1.82
Q	0.44	1.82
H	0.44	1.82

CvFAP amino acid K 309
-	34.80	0.00
S	16.30	25.00
K	11.01	16.89
G	10.13	15.54
D	7.49	11.49
A	4.85	7.43
N	4.85	7.43
R	2.20	3.38
E	2.20	3.38
T	1.76	2.70
P	1.76	2.70
L	1.32	2.03
V	0.44	0.68
C	0.44	0.68
X	0.44	0.68

CvFAP amino acid A 310
K	26.43	27.78
N	14.98	15.74
P	10.13	10.65
L	9.69	10.19
G	7.93	8.33
A	7.05	7.41
V	5.29	5.56
-	4.85	0.00
R	4.85	5.09
Q	3.96	4.17
T	2.20	2.31
S	0.88	0.93
D	0.88	0.93
M	0.44	0.46
I	0.44	0.46

CvFAP amino acid Q 311
T	18.06	18.89
K	18.06	18.89
A	14.10	14.75
R	13.22	13.82
V	9.25	9.68
E	8.81	9.22
Q	5.29	5.53
-	4.41	0.00
S	3.96	4.15
C	2.20	2.30
H	0.88	0.92
D	0.88	0.92
G	0.44	0.46
I	0.44	0.46

CvFAP amino acid A 312
A	70.48	73.39
T	9.25	9.63
C	8.81	9.17
V	6.17	6.42
-	3.96	0.00
S	0.88	0.92
I	0.44	0.46

CvFAP amino acid L 313
T	41.41	42.92
V	11.89	12.33
R	10.13	10.50
K	8.37	8.68
S	6.61	6.85
A	5.29	5.48
-	3.52	0.00
L	2.64	2.74
I	2.64	2.74
G	2.64	2.74
Q	2.20	2.28
E	1.32	1.37
M	0.44	0.46
D	0.44	0.46
C	0.44	0.46

CvFAP amino acid G 314
G	93.39	97.25
-	3.96	0.00
A	1.32	1.38
S	0.88	0.92
R	0.44	0.46

CvFAP amino acid V 315
V	92.07	95.87
-	3.96	0.00
I	3.52	3.67
A	0.44	0.46

CvFAP amino acid E 316
E	32.16	33.49
T	15.42	16.06
Q	14.98	15.60
S	10.57	11.01
H	7.93	8.26
-	3.96	0.00
R	3.96	4.13
K	2.64	2.75
A	2.20	2.29
N	1.32	1.38
L	1.32	1.38
I	1.32	1.38
D	0.88	0.92
V	0.88	0.92
X	0.44	0.46

CvFAP amino acid F 317
Y	45.37	47.47
F	44.93	47.00
-	4.41	0.00
I	3.52	3.69
V	0.88	0.92
X	0.44	0.46
L	0.44	0.46

CvFAP amino acid S 318
A	14.98	15.60
D	13.22	13.76
T	11.45	11.93
S	11.01	11.47
I	7.93	8.26
V	7.49	7.80
K	6.61	6.88
C	6.17	6.42
M	4.41	4.59
-	3.96	0.00
R	3.08	3.21
Q	2.64	2.75
N	2.64	2.75
L	2.64	2.75
G	1.32	1.38
X	0.44	0.46

CvFAP amino acid T 319
L	17.18	17.89
D	11.45	11.93
K	10.13	10.55
Q	8.81	9.17
T	7.49	7.80
V	6.61	6.88
A	6.61	6.88
I	5.73	5.96
-	3.96	0.00
G	3.08	3.21
F	3.08	3.21
S	3.08	3.21
C	3.08	3.21
M	2.64	2.75
N	2.20	2.29
R	1.76	1.83
P	1.32	1.38
X	0.44	0.46
W	0.44	0.46
H	0.44	0.46
E	0.44	0.46

CvFAP amino acid D 320
-	39.65	0.00
G	12.33	20.44
M	11.45	18.98
A	6.17	10.22
E	5.29	8.76
D	4.41	7.30
K	3.96	6.57
N	3.96	6.57
V	3.08	5.11
S	2.20	3.65
Q	1.76	2.92
R	1.76	2.92
P	0.88	1.46
L	0.88	1.46
I	0.88	1.46
T	0.88	1.46
F	0.44	0.73

CvFAP amino acid G 321
-	64.76	0.00
D	14.98	42.50
G	7.49	21.25
S	6.61	18.75
A	1.76	5.00
W	1.32	3.75
K	0.88	2.50
X	0.44	1.25
Q	0.44	1.25
E	0.44	1.25
V	0.44	1.25
R	0.44	1.25

CvFAP amino acid P 322
-	57.71	0.00
D	19.82	46.87
P	7.05	16.67
Q	3.52	8.33
S	3.52	8.33
A	2.64	6.25
G	1.32	3.12
T	1.32	3.12
E	0.88	2.08
X	0.44	1.04
H	0.44	1.04
R	0.44	1.04
V	0.44	1.04
L	0.44	1.04

CvFAP amino acid T 323
D	18.50	20.29
G	16.30	17.87
T	14.98	16.43
S	11.01	12.08
A	9.69	10.63
-	8.81	0.00
F	5.29	5.80
M	3.96	4.35
E	3.08	3.38
H	1.76	1.93
R	1.76	1.93
N	1.32	1.45
K	1.32	1.45
Q	0.88	0.97
V	0.44	0.48
X	0.44	0.48
Y	0.44	0.48

CvFAP amino acid G 324
G	56.83	61.43
S	8.81	9.52
-	7.49	0.00
M	7.05	7.62
R	5.29	5.71
D	4.41	4.76
C	2.20	2.38
N	2.20	2.38
T	2.20	2.38
K	1.32	1.43
A	0.88	0.95
X	0.44	0.48
E	0.44	0.48
L	0.44	0.48

CvFAP amino acid E 325
A	15.86	17.31
E	15.42	16.83
K	11.45	12.50
Q	9.25	10.10
-	8.37	0.00
N	8.37	9.13
V	7.49	8.17
T	4.85	5.29
R	4.41	4.81
M	3.96	4.33
D	2.64	2.88
S	2.20	2.40
F	2.20	2.40
I	2.20	2.40
X	0.44	0.48
G	0.44	0.48
P	0.44	0.48

CvFAP amino acid R 326
T	15.86	17.14
R	13.22	14.29
E	11.89	12.86
A	10.13	10.95
D	7.93	8.57
-	7.49	0.00
P	6.17	6.67
V	5.29	5.71
Q	4.85	5.24
S	4.41	4.76
I	3.52	3.81
K	3.08	3.33
N	2.64	2.86
H	1.32	1.43
L	0.88	0.95
G	0.88	0.95
X	0.44	0.48

CvFAP amino acid L 327
F	25.99	27.83
H	16.74	17.92
V	9.69	10.38
K	7.93	8.49
-	6.61	0.00
R	5.29	5.66
M	5.29	5.66
C	4.41	4.72
Q	3.96	4.25
G	3.08	3.30
L	2.64	2.83
Y	2.20	2.36
E	1.76	1.89
A	1.76	1.89
S	1.32	1.42
T	0.44	0.47
I	0.44	0.47
X	0.44	0.47

CvFAP amino acid S 328
T	17.18	18.31
E	15.42	16.43
S	12.33	13.15
V	12.33	13.15
A	7.49	7.98
-	6.17	0.00
I	5.29	5.63
K	4.85	5.16
D	3.52	3.76
R	3.08	3.29
F	2.64	2.82
N	2.20	2.35
L	2.20	2.35
Q	1.32	1.41
M	0.88	0.94
Y	0.88	0.94
C	0.88	0.94
G	0.44	0.47
X	0.44	0.47
H	0.44	0.47

CvFAP amino acid A 329
A	72.25	74.89
V	9.69	10.05
-	3.52	0.00
T	3.08	3.20
P	2.64	2.74
I	2.64	2.74
S	1.76	1.83
Q	1.76	1.83
R	1.32	1.37
H	1.32	1.37

CvFAP amino acid E 330
R	22.03	22.73
K	21.59	22.27
E	12.78	13.18
S	9.25	9.55
Q	6.61	6.82
G	5.29	5.45
T	4.85	5.00
N	4.41	4.55
-	3.08	0.00
V	2.64	2.73
L	2.20	2.27
A	1.76	1.82
H	1.32	1.36
M	0.88	0.91
C	0.44	0.45
P	0.44	0.45
W	0.44	0.45

CvFAP amino acid L 331
L	65.64	68.35
I	11.89	12.39
T	8.37	8.72
V	6.17	6.42
-	3.96	0.00
C	2.64	2.75
M	0.88	0.92
A	0.44	0.46

CvFAP amino acid A 332
A	52.42	54.59
K	17.62	18.35
N	9.25	9.63
S	5.73	5.96
-	3.96	0.00
R	3.52	3.67
E	3.08	3.21
T	2.20	2.29
G	1.32	1.38
Q	0.44	0.46
H	0.44	0.46

CvFAP amino acid P 333
P	24.23	25.11
A	22.91	23.74
E	14.98	15.53
S	9.69	10.05
K	6.17	6.39
-	3.52	0.00
D	3.52	3.65
Q	3.52	3.65
T	3.52	3.65
C	2.64	2.74
V	1.32	1.37
R	0.88	0.91
N	0.88	0.91
L	0.88	0.91
H	0.88	0.91
G	0.44	0.46

CvFAP amino acid G 334
G	70.04	72.60
D	7.93	8.22
N	4.85	5.02
-	3.52	0.00
E	3.52	3.65
A	3.52	3.65
S	1.76	1.83
R	1.76	1.83
Q	1.32	1.37
H	0.88	0.91
K	0.44	0.46
T	0.44	0.46

CvFAP amino acid G 335
G	92.51	94.59
-	2.20	0.00
V	1.76	1.80
K	1.76	1.80
C	0.88	0.90
R	0.44	0.45
Q	0.44	0.45

CvFAP amino acid E 336
E	97.36	99.10
-	1.76	0.00
Q	0.44	0.45
K	0.44	0.45

CvFAP amino acid V 337
V	87.67	89.24
I	6.17	6.28
A	3.08	3.14
-	1.76	0.00
T	1.32	1.35

CvFAP amino acid I 338
L	43.61	44.59
I	39.21	40.09
V	14.98	15.32
-	2.20	0.00

CvFAP amino acid M 339
L	52.86	54.05
V	19.38	19.82
M	15.42	15.77
C	9.69	9.91
-	2.20	0.00
I	0.44	0.45

CvFAP amino acid C 340
A	38.77	39.64
T	25.55	26.13
C	23.35	23.87
S	9.69	9.91
-	2.20	0.00
V	0.44	0.45

CvFAP amino acid A 341
A	39.21	39.91
G	36.56	37.22
S	17.18	17.49
L	2.20	2.24
-	1.76	0.00
T	1.32	1.35
C	0.88	0.90
D	0.44	0.45
H	0.44	0.45

CvFAP amino acid G 342
G	97.36	99.10
-	1.76	0.00
S	0.44	0.45
X	0.44	0.45

CvFAP amino acid A 343
A	83.70	85.59
S	9.25	9.46
V	3.52	3.60
-	2.20	0.00
T	1.32	1.35

CvFAP amino acid V 344
V	44.49	45.70
I	39.21	40.27
M	5.73	5.88
L	3.96	4.07
-	2.64	0.00
F	2.20	2.26
Y	1.76	1.81

CvFAP amino acid H 345
H	29.52	30.32
Q	24.67	25.34
A	18.06	18.55
G	15.42	15.84
N	7.93	8.14
-	2.64	0.00
S	1.32	1.36
M	0.44	0.45

CvFAP amino acid T 346
S	70.93	72.85
T	25.99	26.70
-	2.64	0.00
N	0.44	0.45

CvFAP amino acid P 347
P	97.36	100.00
-	2.64	0.00

CvFAP amino acid F 348
Q	70.48	72.40
H	22.91	23.53
-	2.64	0.00
K	2.64	2.71
F	1.32	1.36

CvFAP amino acid L 349
L	59.03	60.63
I	22.91	23.53
V	8.37	8.60
M	6.17	6.33
-	2.64	0.00
T	0.44	0.45
F	0.44	0.45

CvFAP amino acid L 350
L	97.36	100.00
-	2.64	0.00

CvFAP amino acid K 351
M	80.62	82.81
Q	11.45	11.76
L	3.96	4.07
-	2.64	0.00
K	1.32	1.36

CvFAP amino acid H 352
L	74.01	76.02
C	12.33	12.67
-	2.64	0.00
I	2.64	2.71
H	2.20	2.26
V	2.20	2.26
A	2.20	2.26
M	1.76	1.81

CvFAP amino acid S 353
S	97.36	99.55
-	2.20	0.00
P	0.44	0.45

CvFAP amino acid G 354
G	97.80	100.00
-	2.20	0.00

CvFAP amino acid V 355
I	59.47	60.81
V	30.40	31.08
L	7.93	8.11
-	2.20	0.00

CvFAP amino acid G 356
G	97.80	100.00
-	2.20	0.00

CvFAP amino acid P 357
P	85.02	86.94
A	5.73	5.86
D	5.29	5.41
-	2.20	0.00
S	0.88	0.90
G	0.44	0.45
N	0.44	0.45

CvFAP amino acid S 358
K	33.48	34.39
A	26.43	27.15
R	18.06	18.55
S	5.73	5.88
E	4.85	4.98
G	4.85	4.98
-	2.64	0.00
P	1.32	1.36
Q	1.32	1.36
D	0.88	0.90
C	0.44	0.45

CvFAP amino acid A 359
A	39.21	40.27
E	18.50	19.00
D	9.25	9.50
K	9.25	9.50
Q	7.93	8.14
G	4.41	4.52
S	3.08	3.17
-	2.64	0.00
N	2.20	2.26
R	1.76	1.81
T	0.88	0.90
P	0.44	0.45
H	0.44	0.45

CvFAP amino acid E 360
H	63.88	65.61
Q	9.25	9.50
E	4.85	4.98
D	4.41	4.52
A	4.41	4.52
T	3.96	4.07
V	3.96	4.07
-	2.64	0.00
I	0.88	0.90
M	0.88	0.90
L	0.44	0.45
S	0.44	0.45

CvFAP amino acid L 361
L	97.36	100.00
-	2.64	0.00

CvFAP amino acid K 362
E	30.40	31.22
K	20.26	20.81
A	12.33	12.67
Q	12.33	12.67
R	10.57	10.86
S	4.41	4.52
-	2.64	0.00
L	1.32	1.36
D	1.32	1.36
G	1.32	1.36
T	1.32	1.36
N	0.88	0.90
I	0.44	0.45
H	0.44	0.45

CvFAP amino acid E 363
E	48.02	49.32
D	21.59	22.17
S	9.69	9.95
K	5.73	5.88
A	4.85	4.98
Q	4.85	4.98
-	2.64	0.00
G	0.88	0.90
R	0.88	0.90
P	0.44	0.45
N	0.44	0.45

CvFAP amino acid F 364
H	52.42	53.60
L	11.89	12.16
F	8.81	9.01
M	7.49	7.66
V	5.29	5.41
N	3.96	4.05
A	2.64	2.70
-	2.20	0.00
K	2.20	2.25
I	0.88	0.90
Y	0.88	0.90
Q	0.44	0.45
S	0.44	0.45
R	0.44	0.45

CvFAP amino acid G 365
G	86.78	88.34
N	5.29	5.38
-	1.76	0.00
D	1.76	1.79
S	1.32	1.35
K	0.88	0.90
A	0.88	0.90
H	0.88	0.90
E	0.44	0.45

CvFAP amino acid I 366
I	87.22	88.79
V	8.37	8.52
L	2.20	2.24
-	1.76	0.00
M	0.44	0.45

CvFAP amino acid P 367
P	39.21	40.09
D	14.98	15.32
E	12.33	12.61
K	11.01	11.26
A	7.49	7.66
R	3.08	3.15
S	2.64	2.70
-	2.20	0.00
G	2.20	2.25
Q	2.20	2.25
T	1.76	1.80
N	0.44	0.45
V	0.44	0.45

CvFAP amino acid V 368
V	58.15	58.93
C	13.66	13.84
L	10.13	10.27
T	7.93	8.04
I	2.64	2.68
P	2.20	2.23
S	1.76	1.79
-	1.32	0.00
A	1.32	1.34
E	0.44	0.45
M	0.44	0.45

CvFAP amino acid V 369
V	57.71	58.48
R	14.10	14.29
I	13.22	13.39
K	3.96	4.02
A	3.52	3.57
L	3.08	3.13
T	1.76	1.79
-	1.32	0.00
E	0.44	0.45
Q	0.44	0.45
M	0.44	0.45

CvFAP amino acid S 370
A	34.80	35.27
S	14.54	14.73
K	14.54	14.73
V	13.66	13.84
H	8.37	8.48
R	4.41	4.46
Q	3.08	3.13
M	1.76	1.79
-	1.32	0.00
L	1.32	1.34
Y	1.32	1.34
T	0.44	0.45
N	0.44	0.45

CvFAP amino acid N 371
D	74.45	75.45
N	11.01	11.16
E	7.05	7.14
H	3.08	3.13
-	1.32	0.00
P	0.88	0.89
A	0.88	0.89
C	0.44	0.45
S	0.44	0.45
G	0.44	0.45

CvFAP amino acid L 372
L	61.23	62.05
V	11.45	11.61
N	6.61	6.70
R	6.61	6.70
I	5.73	5.80
A	2.20	2.23
S	2.20	2.23
C	1.76	1.79
-	1.32	0.00
M	0.88	0.89

CvFAP amino acid A 373
P	75.77	76.79
A	6.61	6.70
D	6.17	6.25
S	3.96	4.02
-	1.32	0.00
E	0.88	0.89
K	0.88	0.89
G	0.88	0.89
H	0.44	0.45
Q	0.44	0.45
N	0.44	0.45
I	0.44	0.45
T	0.44	0.45
C	0.44	0.45
L	0.44	0.45
R	0.44	0.45

CvFAP amino acid G 374
G	65.20	72.91
A	15.42	17.24
-	10.57	0.00
N	3.52	3.94
S	2.20	2.46
E	0.88	0.99
V	0.44	0.49
H	0.44	0.49
Y	0.44	0.49
T	0.44	0.49
D	0.44	0.49

CvFAP amino acid V 375
V	98.68	100.00
-	1.32	0.00

CvFAP amino acid G 376
G	98.68	100.00
-	1.32	0.00

CvFAP amino acid Q 377
E	38.77	39.29
Q	24.67	25.00
K	11.89	12.05
A	8.37	8.48
S	5.73	5.80
V	3.96	4.02
R	3.08	3.13
-	1.32	0.00
G	1.32	1.34
C	0.44	0.45
D	0.44	0.45

CvFAP amino acid N 378
N	82.82	83.93
G	14.10	14.29
-	1.32	0.00
H	1.32	1.34
S	0.44	0.45

CvFAP amino acid L 379
L	93.83	95.52
F	2.64	2.69
-	1.76	0.00
M	1.32	1.35
Y	0.44	0.45

CvFAP amino acid Q 380
Q	92.51	93.75
R	3.52	3.57
A	2.20	2.23
-	1.32	0.00
I	0.44	0.45

CvFAP amino acid D 381
D	98.68	100.00
-	1.32	0.00

CvFAP amino acid Q 382
H	78.85	79.91
Q	19.82	20.09
-	1.32	0.00

CvFAP amino acid P 383
P	95.59	96.88
A	2.20	2.23
-	1.32	0.00
C	0.44	0.45
F	0.44	0.45

CvFAP amino acid A 384
A	94.27	95.54
S	2.64	2.68
T	1.76	1.79
-	1.32	0.00

CvFAP amino acid C 385
A	51.10	51.79
V	25.11	25.45
C	9.25	9.38
G	8.37	8.48
T	4.41	4.46
-	1.32	0.00
I	0.44	0.45

CvFAP amino acid L 386
V	59.47	60.27
L	25.11	25.45
N	4.41	4.46
M	3.96	4.02
T	3.52	3.57
I	1.76	1.79
-	1.32	0.00
C	0.44	0.45

CvFAP amino acid T 387
V	73.57	74.55
I	5.73	5.80
L	5.29	5.36
T	4.41	4.46
F	2.20	2.23
A	2.20	2.23
S	1.76	1.79
-	1.32	0.00
Y	1.32	1.34
N	1.32	1.34
C	0.44	0.45
W	0.44	0.45

CvFAP amino acid A 388
S	71.81	72.77
A	17.18	17.41
T	5.73	5.80
G	1.76	1.79
-	1.32	0.00
C	1.32	1.34
V	0.44	0.45
M	0.44	0.45

CvFAP amino acid A 389
Y	48.90	49.55
F	26.87	27.23
A	7.05	7.14
H	3.96	4.02
W	3.08	3.12
C	2.20	2.23
R	2.20	2.23
S	2.20	2.23
-	1.32	0.00
V	0.88	0.89
N	0.88	0.89
G	0.44	0.45

CvFAP amino acid P 390
E	18.94	19.20
K	15.86	16.07
Q	13.66	13.84
R	10.57	10.71
T	6.61	6.70
P	6.61	6.70
G	6.61	6.70
A	5.29	5.36
N	4.85	4.91
S	3.52	3.57
L	2.64	2.68
-	1.32	0.00
D	1.32	1.34
Y	1.32	1.34
V	0.44	0.45
H	0.44	0.45

CvFAP amino acid V 391
V	21.59	21.88
T	19.38	19.64
C	19.38	19.64
S	16.74	16.96
I	7.93	8.04
A	3.96	4.02
L	3.96	4.02
G	3.96	4.02
-	1.32	0.00
M	0.88	0.89
F	0.44	0.45
P	0.44	0.45

CvFAP amino acid K 392
-	36.56	0.00
P	29.96	47.22
K	21.15	33.33
S	5.73	9.03
A	1.76	2.78
D	1.32	2.08
Q	0.88	1.39
H	0.88	1.39
T	0.88	1.39
C	0.44	0.69
R	0.44	0.69

CvFAP amino acid E 393
-	51.54	0.00
P	10.57	21.82
D	9.69	20.00
E	8.81	18.18
A	6.17	12.73
K	5.29	10.91
R	3.08	6.36
N	1.76	3.64
I	1.32	2.73
Q	0.88	1.82
T	0.44	0.91
L	0.44	0.91

CvFAP amino acid K 394
-	50.66	0.00
E	14.10	28.57
S	9.25	18.75
K	6.61	13.39
A	5.29	10.71
P	4.41	8.93
Q	2.64	5.36
N	2.20	4.46
G	1.76	3.57
D	1.76	3.57
L	0.88	1.79
T	0.44	0.89

CvFAP amino acid Y 395
K	27.31	27.56
D	10.13	10.22
F	9.69	9.78
Q	9.69	9.78
Y	6.61	6.67
S	5.29	5.33
T	4.41	4.44
A	4.41	4.44
E	3.52	3.56
N	3.08	3.11
V	3.08	3.11
C	3.08	3.11
L	2.64	2.67
R	1.76	1.78
G	1.32	1.33
-	0.88	0.00
M	0.88	0.89
W	0.88	0.89
P	0.88	0.89
H	0.44	0.44

CvFAP amino acid D 396
K	40.97	41.52
R	16.74	16.96
Q	12.33	12.50
D	8.37	8.48
E	7.93	8.04
L	3.52	3.57
G	2.64	2.68
S	1.76	1.79
-	1.32	0.00
A	1.32	1.34
W	1.32	1.34
T	0.88	0.89
V	0.44	0.45
C	0.44	0.45

CvFAP amino acid G 397
G	55.07	55.80
K	16.74	16.96
P	7.93	8.04
D	7.05	7.14
A	6.17	6.25
R	1.76	1.79
-	1.32	0.00
N	1.32	1.34
V	1.32	1.34
S	0.44	0.45
H	0.44	0.45
E	0.44	0.45

CvFAP amino acid I 398
V	37.89	38.57
I	25.11	25.56
K	10.57	10.76
L	9.69	9.87
C	5.29	5.38
M	4.41	4.48
A	2.20	2.24
-	1.76	0.00
R	1.32	1.35
D	0.88	0.90
T	0.88	0.90

CvFAP amino acid A 399
S	81.50	82.59
A	10.57	10.71
R	1.76	1.79
-	1.32	0.00
K	1.32	1.34
D	0.88	0.89
T	0.88	0.89
Y	0.44	0.45
N	0.44	0.45
C	0.44	0.45
I	0.44	0.45

CvFAP amino acid I 400
V	44.05	44.84
I	14.10	14.35
L	13.22	13.45
S	7.93	8.07
A	4.41	4.48
P	3.96	4.04
H	3.52	3.59
K	2.20	2.24
-	1.76	0.00
N	1.32	1.35
M	1.32	1.35
T	1.32	1.35
R	0.44	0.45
D	0.44	0.45

CvFAP amino acid S 401
T	70.48	71.75
S	22.03	22.42
-	1.76	0.00
R	1.32	1.35
C	1.32	1.35
K	0.88	0.90
P	0.88	0.90
V	0.88	0.90
I	0.44	0.45

CvFAP amino acid D 402
S	47.58	48.65
D	42.73	43.69
T	3.52	3.60
-	2.20	0.00
R	0.88	0.90
A	0.88	0.90
N	0.88	0.90
G	0.44	0.45
Q	0.44	0.45
L	0.44	0.45

CvFAP amino acid H 403
K	28.63	29.28
E	25.99	26.58
H	15.42	15.77
Q	10.13	10.36
D	9.25	9.46
-	2.20	0.00
V	2.20	2.25
L	1.76	1.80
I	1.76	1.80
S	0.88	0.90
R	0.88	0.90
T	0.44	0.45
P	0.44	0.45

CvFAP amino acid I 404
I	37.00	37.67
L	24.67	25.11
F	12.33	12.56
A	9.25	9.42
M	7.93	8.07
V	3.52	3.59
Y	3.08	3.14
-	1.76	0.00
R	0.44	0.45

CvFAP amino acid Y 405
R	52.86	53.81
Y	19.38	19.73
K	11.89	12.11
F	5.73	5.83
L	3.96	4.04
V	2.20	2.24
-	1.76	0.00
S	0.88	0.90
N	0.44	0.45
G	0.44	0.45
M	0.44	0.45

CvFAP amino acid N 406
L	37.44	38.12
I	21.59	21.97
T	6.61	6.73
N	6.61	6.73
D	5.29	5.38
M	4.41	4.48
F	3.96	4.04
V	3.96	4.04
W	3.52	3.59
-	1.76	0.00
S	1.32	1.35
H	0.88	0.90
A	0.88	0.90
K	0.44	0.45
G	0.44	0.45
R	0.44	0.45
P	0.44	0.45

CvFAP amino acid E 407
F	26.43	27.15
P	18.94	19.46
K	7.93	8.14
E	6.17	6.33
W	6.17	6.33
M	4.85	4.98
L	4.41	4.52
G	3.96	4.07
S	3.52	3.62
A	3.52	3.62
R	3.08	3.17
-	2.64	0.00
D	1.76	1.81
I	1.32	1.36
C	1.32	1.36
T	0.88	0.90
Q	0.88	0.90
V	0.88	0.90
H	0.88	0.90
N	0.44	0.45

CvFAP amino acid K 408
G	70.48	72.40
K	7.93	8.14
R	6.61	6.79
-	2.64	0.00
H	2.64	2.71
S	2.64	2.71
N	2.20	2.26
D	1.32	1.36
Q	1.32	1.36
I	1.32	1.36
E	0.44	0.45
L	0.44	0.45

CvFAP amino acid G 409
T	39.65	42.65
S	14.10	15.17
G	10.57	11.37
K	10.13	10.90
-	7.05	0.00
M	4.85	5.21
L	3.96	4.27
A	2.20	2.37
C	1.76	1.90
N	1.76	1.90
R	1.32	1.42
P	0.88	0.95
F	0.88	0.95
V	0.44	0.47
Q	0.44	0.47

CvFAP amino acid Q 410
-	18.94	0.00
G	15.42	19.02
N	12.78	15.76
T	11.89	14.67
K	8.37	10.33
A	7.93	9.78
S	7.49	9.24
V	7.05	8.70
P	3.08	3.80
R	2.64	3.26
Q	2.20	2.72
E	0.88	1.09
M	0.88	1.09
I	0.44	0.54

CvFAP amino acid I 411
L	28.19	32.99
I	22.47	26.29
-	14.54	0.00
K	10.57	12.37
Y	10.13	11.86
V	6.61	7.73
F	3.08	3.61
M	1.76	2.06
W	0.88	1.03
A	0.44	0.52
D	0.44	0.52
Q	0.44	0.52
T	0.44	0.52

CvFAP amino acid R 412
N	46.26	47.30
S	13.22	13.51
R	12.78	13.06
H	11.01	11.26
K	6.61	6.76
D	6.61	6.76
-	2.20	0.00
Y	0.44	0.45
C	0.44	0.45
G	0.44	0.45

CvFAP amino acid K 413
P	77.09	78.83
K	7.93	8.11
L	4.41	4.50
V	3.08	3.15
I	2.64	2.70
-	2.20	0.00
W	1.32	1.35
A	0.44	0.45
C	0.44	0.45
F	0.44	0.45

CvFAP amino acid R 414
L	20.26	20.63
R	18.94	19.28
F	11.45	11.66
K	11.01	11.21
A	7.05	7.17
G	5.29	5.38
M	5.29	5.38
I	5.29	5.38
W	4.85	4.93
V	3.08	3.14
S	2.20	2.24
-	1.76	0.00
H	1.32	1.35
T	1.32	1.35
Y	0.88	0.90

CvFAP amino acid A 415
P	33.48	34.08
A	25.55	26.01
T	14.54	14.80
V	6.61	6.73
S	6.17	6.28
R	4.41	4.48
W	3.52	3.59
Q	1.76	1.79
-	1.76	0.00
H	1.32	1.35
L	0.44	0.45
K	0.44	0.45

CvFAP amino acid I 416
L	27.31	27.68
V	26.43	26.79
I	22.03	22.32
M	9.25	9.38
F	5.29	5.36
T	3.96	4.02
A	3.08	3.13
-	1.32	0.00
P	0.44	0.45
G	0.44	0.45
R	0.44	0.45

CvFAP amino acid A 417
L	70.93	71.88
A	9.25	9.38
F	4.41	4.46
I	3.52	3.57
T	3.08	3.12
M	2.64	2.68
W	1.76	1.79
-	1.32	0.00
S	0.88	0.89
V	0.88	0.89
Y	0.44	0.45
G	0.44	0.45
C	0.44	0.45

CvFAP amino acid S 418
Q	31.72	32.14
K	24.23	24.55
R	13.22	13.39
E	10.13	10.27
N	10.13	10.27
S	5.29	5.36
-	1.32	0.00
A	1.32	1.34
T	0.88	0.89
I	0.88	0.89
H	0.44	0.45
D	0.44	0.45

CvFAP amino acid Y 419
W	74.45	75.11
Y	22.91	23.11
L	0.88	0.89
-	0.88	0.00
R	0.44	0.44
X	0.44	0.44

CvFAP amino acid L 420
L	64.76	65.33
F	17.18	17.33
A	3.96	4.00
M	3.52	3.56
V	2.64	2.67
I	2.20	2.22
T	1.76	1.78
G	1.32	1.33
Y	0.88	0.89
-	0.88	0.00
S	0.44	0.44
X	0.44	0.44

CvFAP amino acid L 421
L	47.14	47.56
F	20.70	20.89
V	8.81	8.89
M	5.73	5.78
T	5.29	5.33
I	4.85	4.89
C	3.52	3.56
A	1.76	1.78
-	0.88	0.00
W	0.44	0.44
R	0.44	0.44
X	0.44	0.44

CvFAP amino acid G 422
F	30.84	31.11
R	15.42	15.56
T	10.13	10.22
A	7.49	7.56
G	6.17	6.22
S	6.17	6.22
L	6.17	6.22
Q	4.41	4.44
N	3.08	3.11
M	3.08	3.11
K	3.08	3.11
W	1.32	1.33
-	0.88	0.00
P	0.44	0.44
X	0.44	0.44
Y	0.44	0.44
C	0.44	0.44

CvFAP amino acid G 423
G	47.58	48.00
R	25.99	26.22
K	23.35	23.56
S	1.76	1.78
-	0.88	0.00
X	0.44	0.44

CvFAP amino acid R 424
R	29.96	30.22
T	23.35	23.56
K	21.59	21.78
S	17.18	17.33
N	3.96	4.00
A	0.88	0.89
-	0.88	0.00
G	0.44	0.44
X	0.44	0.44
Q	0.44	0.44
V	0.44	0.44
E	0.44	0.44

CvFAP amino acid G 425
G	98.24	99.11
-	0.88	0.00
V	0.44	0.44
X	0.44	0.44

CvFAP amino acid G 426
P	55.07	55.56
V	13.22	13.33
A	10.57	10.67
L	10.13	10.22
I	2.64	2.67
S	2.64	2.67
E	2.20	2.22
G	1.76	1.78
-	0.88	0.00
X	0.44	0.44
M	0.44	0.44

CvFAP amino acid L 427
L	88.11	88.89
M	9.25	9.33
-	0.88	0.00
A	0.44	0.44
X	0.44	0.44
F	0.44	0.44
V	0.44	0.44

CvFAP amino acid T 428
T	78.85	79.56
A	14.54	14.67
C	3.08	3.11
S	1.76	1.78
-	0.88	0.00
E	0.44	0.44
P	0.44	0.44

CvFAP amino acid S 429
S	77.09	77.43
T	19.82	19.91
C	1.32	1.33
A	0.88	0.88
G	0.44	0.44
-	0.44	0.00

CvFAP amino acid T 430
T	46.26	46.46
V	29.07	29.20
P	22.03	22.12
A	1.32	1.33
S	0.88	0.88
-	0.44	0.00

CvFAP amino acid G 431
G	76.21	76.89
A	16.74	16.89
M	3.52	3.56
L	1.76	1.78
-	0.88	0.00
V	0.88	0.89

CvFAP amino acid C 432
C	98.68	99.56
-	0.88	0.00
S	0.44	0.44

CvFAP amino acid D 433
D	81.50	82.22
E	17.18	17.33
-	0.88	0.00
R	0.44	0.44

CvFAP amino acid R 434
H	63.44	64.29
R	9.25	9.38
Y	8.81	8.93
F	6.17	6.25
Q	5.73	5.80
A	4.41	4.46
-	1.32	0.00
N	0.44	0.45
T	0.44	0.45

CvFAP amino acid G 435
G	98.24	99.55
-	1.32	0.00
P	0.44	0.45

CvFAP amino acid A 436
G	54.19	54.91
A	42.73	43.30
-	1.32	0.00
L	1.32	1.34
C	0.44	0.45

CvFAP amino acid F 437
F	92.51	93.33
M	3.96	4.00
Y	1.76	1.78
-	0.88	0.00
H	0.44	0.44
V	0.44	0.44

CvFAP amino acid V 438
F	43.17	43.56
V	34.80	35.11
L	7.49	7.56
I	4.85	4.89
A	3.52	3.56
T	2.64	2.67
Y	2.64	2.67
-	0.88	0.00

CvFAP amino acid R 439
R	45.81	46.22
K	28.19	28.44
S	12.33	12.44
Q	2.64	2.67
P	2.20	2.22
H	1.76	1.78
T	1.76	1.78
N	1.32	1.33
Y	1.32	1.33
A	1.32	1.33
-	0.88	0.00
C	0.44	0.44

CvFAP amino acid T 440
T	79.30	80.00
S	6.61	6.67
V	5.73	5.78
L	5.73	5.78
I	1.32	1.33
-	0.88	0.00
A	0.44	0.44

CvFAP amino acid A 441
S	30.84	31.39
A	19.38	19.73
T	10.57	10.76
P	8.81	8.97
G	7.93	8.07
R	6.61	6.73
D	6.61	6.73
-	1.76	0.00
N	1.76	1.79
E	1.76	1.79
Q	1.32	1.35
K	1.32	1.35
L	0.88	0.90
H	0.44	0.45

CvFAP amino acid G 442
A	37.00	37.67
E	14.10	14.35
P	12.78	13.00
G	10.57	10.76
N	7.05	7.17
K	5.73	5.83
S	4.85	4.93
R	3.52	3.59
D	2.20	2.24
-	1.76	0.00
V	0.44	0.45

CvFAP amino acid Q 443
A	25.55	26.01
S	25.11	25.56
E	11.01	11.21
D	10.57	10.76
G	9.25	9.42
Q	4.85	4.93
R	3.96	4.04
K	2.20	2.24
T	2.20	2.24
-	1.76	0.00
V	1.76	1.79
I	0.88	0.90
N	0.44	0.45
W	0.44	0.45

CvFAP amino acid A 444
G	20.26	20.54
A	11.45	11.61
K	11.01	11.16
E	9.69	9.82
S	8.81	8.93
P	8.81	8.93
T	7.93	8.04
D	7.05	7.14
N	4.41	4.46
Q	3.52	3.57
L	2.20	2.23
H	2.20	2.23
R	1.32	1.34
-	1.32	0.00

CvFAP amino acid L 445
Q	34.36	34.82
S	29.96	30.36
D	14.98	15.18
L	6.17	6.25
E	5.73	5.80
A	4.41	4.46
V	1.32	1.34
-	1.32	0.00
T	0.44	0.45
C	0.44	0.45
N	0.44	0.45
H	0.44	0.45

CvFAP amino acid P 446
P	80.18	80.89
A	8.81	8.89
C	6.61	6.67
T	1.76	1.78
S	1.32	1.33
-	0.88	0.00
G	0.44	0.44

CvFAP amino acid D 447
D	86.78	87.56
N	3.96	4.00
R	3.52	3.56
Q	2.20	2.22
K	1.32	1.33
S	0.88	0.89
-	0.88	0.00
M	0.44	0.44

CvFAP amino acid L 448
L	85.46	86.61
V	8.37	8.48
I	3.52	3.57
-	1.32	0.00
C	0.88	0.89
R	0.44	0.45

CvFAP amino acid Q 449
Q	98.24	99.11
-	0.88	0.00
R	0.44	0.44
V	0.44	0.44

CvFAP amino acid V 450
M	31.28	31.70
L	22.03	22.32
I	21.59	21.87
V	15.86	16.07
F	6.17	6.25
Y	1.76	1.79
-	1.32	0.00

CvFAP amino acid R 451
R	98.24	99.55
-	1.32	0.00
X	0.44	0.45

CvFAP amino acid F 452
F	97.36	99.10
-	1.76	0.00
W	0.44	0.45
Y	0.44	0.45

CvFAP amino acid V 453
L	44.49	45.29
V	32.16	32.74
I	21.15	21.52
-	1.76	0.00
P	0.44	0.45

CvFAP amino acid P 454
A	48.46	49.11
P	38.77	39.29
G	5.73	5.80
S	4.85	4.91
-	1.32	0.00
V	0.88	0.89

CvFAP amino acid G 455
A	51.54	52.23
G	22.91	23.21
T	12.33	12.50
E	4.85	4.91
F	4.41	4.46
V	1.76	1.79
-	1.32	0.00
S	0.88	0.89

CvFAP amino acid M 456
R	45.81	46.43
K	14.54	14.73
L	12.78	12.95
M	7.05	7.14
F	5.29	5.36
C	3.08	3.13
Q	3.08	3.13
H	2.64	2.68
V	1.32	1.34
A	1.32	1.34
-	1.32	0.00
W	0.44	0.45
Y	0.44	0.45
N	0.44	0.45
E	0.44	0.45

CvFAP amino acid A 457
A	73.57	74.55
S	18.50	18.75
G	6.61	6.70
-	1.32	0.00

CvFAP amino acid L 458
L	30.84	32.71
V	22.91	24.30
M	10.57	11.21
T	7.05	7.48
Q	7.05	7.48
I	6.61	7.01
S	6.17	6.54
-	5.73	0.00
A	2.20	2.34
K	0.44	0.47
E	0.44	0.47

CvFAP amino acid D 459
T	29.52	29.91
S	24.23	24.55
D	19.38	19.64
G	9.69	9.82
E	4.85	4.91
N	3.96	4.02
A	2.64	2.68
H	1.32	1.34
Q	1.32	1.34
M	1.32	1.34
-	1.32	0.00
F	0.44	0.45

CvFAP amino acid P 460
P	63.44	64.29
A	33.48	33.93
-	1.32	0.00
T	0.44	0.45
S	0.44	0.45
N	0.44	0.45
W	0.44	0.45

CvFAP amino acid D 461
D	86.34	87.50
L	4.41	4.46
S	2.64	2.68
M	2.20	2.23
H	1.32	1.34
-	1.32	0.00
A	0.44	0.45
Y	0.44	0.45
I	0.44	0.45
R	0.44	0.45

CvFAP amino acid G 462
G	91.19	92.41
P	4.41	4.46
A	2.64	2.68
-	1.32	0.00
R	0.44	0.45

CvFAP amino acid V 463
M	51.98	52.68
V	23.79	24.11
I	18.50	18.75
Y	4.41	4.46
-	1.32	0.00

CvFAP amino acid S 464
S	33.04	33.48
G	18.06	18.30
T	14.54	14.73
N	10.13	10.27
K	5.73	5.80
A	5.73	5.80
Q	4.41	4.46
L	1.76	1.79
R	1.76	1.79
H	1.32	1.34
V	1.32	1.34
-	1.32	0.00
F	0.88	0.89

CvFAP amino acid T 465
S	45.37	45.98
T	41.41	41.96
N	8.81	8.93
A	3.08	3.13
-	1.32	0.00

CvFAP amino acid Y 466
Y	39.65	40.36
F	32.16	32.74
L	17.62	17.94
V	3.52	3.59
I	3.08	3.14
S	1.76	1.79
-	1.76	0.00
E	0.44	0.45

CvFAP amino acid V 467
T	37.44	38.29
I	10.13	10.36
S	8.81	9.01
V	7.49	7.66
A	6.61	6.76
E	6.61	6.76
K	5.73	5.86
Q	4.85	4.95
C	3.52	3.60
G	2.64	2.70
-	2.20	0.00
R	1.76	1.80
D	1.32	1.35
P	0.44	0.45
N	0.44	0.45

CvFAP amino acid R 468
K	29.96	30.77
E	14.54	14.93
Q	11.89	12.22
T	11.89	12.22
R	7.05	7.24
D	5.29	5.43
S	5.29	5.43
N	3.08	3.17
A	2.64	2.71
-	2.64	0.00
V	1.76	1.81
M	1.32	1.36
L	1.32	1.36
I	0.88	0.90
H	0.44	0.45

CvFAP amino acid F 469
F	63.88	65.91
Y	15.86	16.36
M	6.61	6.82
I	5.73	5.91
-	3.08	0.00
L	2.64	2.73
G	1.32	1.36
A	0.88	0.91

CvFAP amino acid A 470
G	33.48	34.55
R	31.72	32.73
A	15.86	16.36
K	7.49	7.73
S	3.08	3.18
E	3.08	3.18
-	3.08	0.00
Q	1.32	1.36
L	0.88	0.91

CvFAP amino acid K 471
K	24.23	25.23
N	14.98	15.60
S	12.33	12.84
A	11.01	11.47
E	8.81	9.17
R	7.93	8.26
D	5.29	5.50
-	3.96	0.00
Q	3.52	3.67
T	3.52	3.67
H	1.76	1.83
G	1.32	1.38
Y	0.44	0.46
W	0.44	0.46
M	0.44	0.46

CvFAP amino acid F 472
T	21.59	22.48
G	14.98	15.60
K	9.25	9.63
L	7.93	8.26
A	7.93	8.26
S	7.49	7.80
F	6.17	6.42
N	4.41	4.59
M	3.96	4.13
-	3.96	0.00
R	3.08	3.21
E	3.08	3.21
I	2.20	2.29
V	2.20	2.29
Q	1.76	1.83

CvFAP amino acid Q 473
K	22.47	23.83
A	15.42	16.36
L	11.89	12.62
P	9.69	10.28
T	8.81	9.35
G	7.05	7.48
-	5.73	0.00
Q	4.85	5.14
R	3.96	4.21
V	3.08	3.27
S	3.08	3.27
F	0.88	0.93
E	0.88	0.93
N	0.88	0.93
W	0.44	0.47
I	0.44	0.47
D	0.44	0.47

CvFAP amino acid S 474
-	78.85	0.00
K	9.25	43.75
T	3.08	14.58
S	2.20	10.42
E	1.76	8.33
A	1.76	8.33
R	1.32	6.25
Q	0.88	4.17
D	0.44	2.08
G	0.44	2.08

CvFAP amino acid Q 475
-	80.62	0.00
Q	4.85	25.00
N	4.41	22.73
E	4.41	22.73
L	2.20	11.36
A	1.32	6.82
S	1.32	6.82
R	0.88	4.55

CvFAP amino acid G 476
-	81.06	0.00
G	14.54	76.74
R	1.32	6.98
S	1.32	6.98
T	0.88	4.65
E	0.44	2.33
K	0.44	2.33

CvFAP amino acid L 477
-	81.06	0.00
R	4.85	25.58
L	4.41	23.26
S	3.96	20.93
K	1.76	9.30
Q	1.76	9.30
I	0.88	4.65
E	0.88	4.65
A	0.44	2.33

CvFAP amino acid K 478
N	21.59	22.48
S	18.94	19.72
K	13.22	13.76
A	9.69	10.09
R	9.25	9.63
D	4.85	5.05
I	4.41	4.59
-	3.96	0.00
Q	3.96	4.13
T	2.64	2.75
H	2.20	2.29
V	1.76	1.83
G	1.76	1.83
M	1.32	1.38
Y	0.44	0.46

CvFAP amino acid W 479
H	32.16	33.33
W	24.23	25.11
L	8.37	8.68
F	6.61	6.85
P	6.61	6.85
R	4.85	5.02
A	4.41	4.57
T	3.96	4.11
-	3.52	0.00
M	3.08	3.20
V	0.88	0.91
Y	0.44	0.46
Q	0.44	0.46
I	0.44	0.46

CvFAP amino acid P 480
P	58.59	60.45
K	7.49	7.73
D	7.05	7.27
E	6.61	6.82
A	3.52	3.64
T	3.52	3.64
L	3.08	3.18
-	3.08	0.00
S	1.32	1.36
Q	1.32	1.36
V	1.32	1.36
R	0.88	0.91
I	0.88	0.91
G	0.88	0.91
Y	0.44	0.45

CvFAP amino acid S 481
D	43.61	44.80
S	34.80	35.75
P	6.61	6.79
A	3.96	4.07
G	3.52	3.62
-	2.64	0.00
C	2.20	2.26
T	1.76	1.81
N	0.44	0.45
W	0.44	0.45

CvFAP amino acid G 482
G	97.80	100.00
-	2.20	0.00

CvFAP amino acid I 483
F	50.22	51.35
Y	20.70	21.17
I	9.25	9.46
L	7.49	7.66
V	7.05	7.21
M	2.64	2.70
-	2.20	0.00
T	0.44	0.45

CvFAP amino acid T 484
T	51.54	52.70
S	44.93	45.95
-	2.20	0.00
G	0.88	0.90
I	0.44	0.45

CvFAP amino acid M 485
F	54.19	55.66
I	13.66	14.03
L	13.22	13.57
T	4.85	4.98
M	3.96	4.07
V	3.96	4.07
A	3.08	3.17
-	2.64	0.00
Y	0.44	0.45

CvFAP amino acid Q 486
Q	97.36	99.55
-	2.20	0.00
T	0.44	0.45

CvFAP amino acid L 487
S	34.36	35.14
L	14.98	15.32
V	11.45	11.71
N	10.13	10.36
A	8.37	8.56
C	6.17	6.31
I	4.85	4.95
P	4.41	4.50
T	3.08	3.15
-	2.20	0.00

CvFAP amino acid I 488
I	46.26	47.30
V	32.16	32.88
L	18.94	19.37
-	2.20	0.00
S	0.44	0.45

CvFAP amino acid A 489
A	77.97	79.37
C	10.13	10.31
V	5.29	5.38
G	1.76	1.79
-	1.76	0.00
N	1.32	1.35
T	1.32	1.35
L	0.44	0.45

CvFAP amino acid C 490
V	29.96	30.49
A	28.63	29.15
C	21.15	21.52
I	14.10	14.35
T	3.08	3.14
-	1.76	0.00
S	1.32	1.35

CvFAP amino acid R 491
R	97.80	99.55
-	1.76	0.00
Q	0.44	0.45

CvFAP amino acid P 492
P	74.89	76.23
A	22.03	22.42
-	1.76	0.00
S	0.88	0.90
G	0.44	0.45

CvFAP amino acid Q 493
K	42.29	43.24
R	14.10	14.41
Q	13.66	13.96
H	11.89	12.16
E	3.96	4.05
L	3.52	3.60
A	3.52	3.60
V	2.64	2.70
-	2.20	0.00
S	0.88	0.90
T	0.44	0.45
G	0.44	0.45
M	0.44	0.45

CvFAP amino acid S 494
S	78.85	80.63
C	7.93	8.11
A	5.73	5.86
G	3.96	4.05
-	2.20	0.00
N	0.44	0.45
D	0.44	0.45
X	0.44	0.45

CvFAP amino acid T 495
R	49.34	50.45
K	22.47	22.97
E	5.73	5.86
V	5.29	5.41
T	3.96	4.05
Q	3.52	3.60
S	3.08	3.15
-	2.20	0.00
C	2.20	2.25
A	1.76	1.80
H	0.44	0.45

CvFAP amino acid G 496
G	97.80	100.00
-	2.20	0.00

CvFAP amino acid S 497
R	45.37	46.19
S	25.55	26.01
Y	7.05	7.17
E	4.85	4.93
C	4.85	4.93
K	2.64	2.69
Q	2.64	2.69
H	1.76	1.79
-	1.76	0.00
T	1.32	1.35
A	0.88	0.90
W	0.44	0.45
L	0.44	0.45
F	0.44	0.45

CvFAP amino acid V 498
V	74.01	75.34
I	16.30	16.59
L	6.61	6.73
-	1.76	0.00
Q	0.44	0.45
R	0.44	0.45
M	0.44	0.45

CvFAP amino acid G 499
R	41.85	42.60
S	10.13	10.31
T	8.81	8.97
G	8.37	8.52
L	7.05	7.17
K	6.61	6.73
E	4.85	4.93
C	3.08	3.14
A	2.64	2.69
M	2.20	2.24
-	1.76	0.00
N	1.32	1.35
Q	0.44	0.45
H	0.44	0.45
V	0.44	0.45

CvFAP amino acid L 500
L	89.43	91.03
I	5.73	5.83
M	1.76	1.79
-	1.76	0.00
D	0.44	0.45
P	0.44	0.45
V	0.44	0.45

CvFAP amino acid K 501
A	30.40	30.94
R	23.79	24.22
K	21.59	21.97
Q	9.69	9.87
S	5.73	5.83
V	2.20	2.24
T	1.76	1.79
-	1.76	0.00
D	1.32	1.35
G	1.32	1.35
Y	0.44	0.45

CvFAP amino acid S 502
S	83.26	84.75
T	5.73	5.83
D	5.29	5.38
A	1.76	1.79
-	1.76	0.00
G	1.32	1.35
N	0.88	0.90

CvFAP amino acid A 503
A	43.17	43.95
S	27.31	27.80
T	4.85	4.93
D	4.85	4.93
N	4.41	4.48
K	3.52	3.59
P	3.52	3.59
G	3.08	3.14
R	2.64	2.69
-	1.76	0.00
I	0.88	0.90

CvFAP amino acid D 504
D	47.58	48.43
N	36.12	36.77
S	7.05	7.17
A	5.29	5.38
-	1.76	0.00
T	0.88	0.90
H	0.88	0.90
V	0.44	0.45

CvFAP amino acid P 505
P	67.40	68.61
T	10.57	10.76
Y	7.93	8.07
V	2.64	2.69
I	2.64	2.69
M	2.64	2.69
S	2.20	2.24
-	1.76	0.00
A	1.32	1.35
F	0.44	0.45
H	0.44	0.45

CvFAP amino acid F 506
F	19.82	20.18
H	17.62	17.94
E	10.57	10.76
L	10.13	10.31
A	7.93	8.07
S	6.61	6.73
R	5.29	5.38
D	5.29	5.38
Q	3.52	3.59
N	2.64	2.69
G	2.64	2.69
-	1.76	0.00
M	1.76	1.79
Y	1.32	1.35
K	0.88	0.90
W	0.88	0.90
T	0.88	0.90
C	0.44	0.45

CvFAP amino acid A 507
D	41.41	42.15
A	18.06	18.39
V	8.81	8.97
E	7.05	7.17
I	6.61	6.73
S	6.61	6.73
T	3.52	3.59
K	2.64	2.69
-	1.76	0.00
M	1.76	1.79
Q	1.76	1.79

CvFAP amino acid P 508
K	63.00	64.13
R	12.33	12.56
A	5.73	5.83
P	4.85	4.93
S	4.41	4.48
N	3.08	3.14
-	1.76	0.00
L	1.76	1.79
H	1.76	1.79
T	0.88	0.90
Q	0.44	0.45

CvFAP amino acid P 509
P	97.36	98.66
-	1.32	0.00
V	0.44	0.45
M	0.44	0.45
A	0.44	0.45

CvFAP amino acid K 510
I	26.87	27.23
V	22.91	23.21
L	15.42	15.62
A	9.25	9.37
K	4.85	4.91
S	4.85	4.91
R	4.41	4.46
T	3.52	3.57
M	1.76	1.79
Q	1.32	1.34
-	1.32	0.00
E	0.88	0.89
D	0.88	0.89
N	0.88	0.89
H	0.44	0.45
W	0.44	0.45

CvFAP amino acid L 511
I	60.35	61.43
L	19.82	20.18
V	18.06	18.39
-	1.76	0.00

CvFAP amino acid S 512
D	32.16	32.74
E	31.28	31.84
S	14.98	15.25
N	6.61	6.73
Q	3.08	3.14
H	2.64	2.69
-	1.76	0.00
V	1.76	1.79
T	1.76	1.79
R	1.32	1.35
W	1.32	1.35
M	0.88	0.90
K	0.44	0.45

CvFAP amino acid P 513
G	31.28	31.84
T	20.70	21.08
Y	8.37	8.52
N	7.93	8.07
L	6.61	6.73
P	6.17	6.28
A	5.29	5.38
I	4.41	4.48
S	3.52	3.59
V	2.20	2.24
-	1.76	0.00
D	1.32	1.35
H	0.44	0.45

CvFAP amino acid G 514
G	48.90	49.78
N	19.82	20.18
L	6.17	6.28
A	5.29	5.38
V	5.29	5.38
D	3.96	4.04
I	2.20	2.24
-	1.76	0.00
R	1.76	1.79
S	1.32	1.35
C	1.32	1.35
K	1.32	1.35
H	0.44	0.45
M	0.44	0.45

CvFAP amino acid Y 515
Y	70.48	71.75
W	13.22	13.45
H	7.49	7.62
F	7.05	7.17
-	1.76	0.00

CvFAP amino acid L 516
L	85.02	86.55
F	6.61	6.73
-	1.76	0.00
M	1.76	1.79
C	1.76	1.79
Y	1.32	1.35
G	0.88	0.90
I	0.88	0.90

CvFAP amino acid T 517
S	47.14	48.20
T	23.35	23.87
N	10.57	10.81
A	3.08	3.15
E	3.08	3.15
K	3.08	3.15
-	2.20	0.00
D	2.20	2.25
R	2.20	2.25
G	1.32	1.35
Q	0.88	0.90
H	0.44	0.45
V	0.44	0.45

CvFAP amino acid D 518
D	56.39	57.40
S	15.42	15.70
N	8.81	8.97
A	6.17	6.28
Q	4.85	4.93
E	3.08	3.14
-	1.76	0.00
H	1.76	1.79
G	0.44	0.45
P	0.44	0.45
R	0.44	0.45
T	0.44	0.45

CvFAP amino acid K 519
E	25.55	26.01
P	21.15	21.52
A	13.66	13.90
K	10.57	10.76
D	10.57	10.76
G	5.73	5.83
R	3.52	3.59
S	3.08	3.14
Q	2.64	2.69
-	1.76	0.00
T	0.44	0.45
N	0.44	0.45
H	0.44	0.45
L	0.44	0.45

CvFAP amino acid D 520
-	84.14	0.00
G	5.29	33.33
E	3.96	25.00
D	3.52	22.22
A	0.88	5.56
L	0.44	2.78
S	0.44	2.78
N	0.44	2.78
T	0.44	2.78
Q	0.44	2.78

CvFAP amino acid G 521
-	79.30	0.00
G	12.33	59.57
S	3.96	19.15
D	1.32	6.38
K	0.88	4.26
E	0.44	2.13
T	0.44	2.13
L	0.44	2.13
N	0.44	2.13
H	0.44	2.13

CvFAP amino acid A 522
A	29.96	33.01
E	20.70	22.82
R	14.54	16.02
S	9.25	10.19
-	9.25	0.00
Q	5.29	5.83
K	3.96	4.37
D	3.52	3.88
N	2.20	2.43
H	0.88	0.97
T	0.44	0.49

CvFAP amino acid D 523
D	98.24	99.55
-	1.32	0.00
A	0.44	0.45

CvFAP amino acid L 524
L	38.77	39.29
V	27.31	27.68
M	10.13	10.27
I	9.25	9.38
R	8.81	8.93
F	2.20	2.23
A	1.32	1.34
-	1.32	0.00
K	0.44	0.45
T	0.44	0.45

CvFAP amino acid A 525
A	55.95	56.70
K	11.89	12.05
E	8.81	8.93
V	5.29	5.36
R	5.29	5.36
Q	5.29	5.36
M	3.08	3.13
-	1.32	0.00
T	0.88	0.89
H	0.44	0.45
I	0.44	0.45
D	0.44	0.45
S	0.44	0.45
Y	0.44	0.45

CvFAP amino acid T 526
T	82.82	83.93
S	12.78	12.95
A	2.64	2.68
-	1.32	0.00
E	0.44	0.45

CvFAP amino acid L 527
L	70.48	71.43
I	21.15	21.43
M	6.61	6.70
-	1.32	0.00
K	0.44	0.45

CvFAP amino acid R 528
R	74.89	76.23
V	10.57	10.76
K	4.85	4.93
I	3.52	3.59
L	2.64	2.69
-	1.76	0.00
M	0.88	0.90
A	0.44	0.45
T	0.44	0.45

CvFAP amino acid K 529
E	57.71	58.48
N	14.54	14.73
K	7.49	7.59
S	5.29	5.36
A	3.52	3.57
D	2.64	2.68
H	2.20	2.23
R	1.32	1.34
Q	1.32	1.34
T	1.32	1.34
V	1.32	1.34
-	1.32	0.00

CvFAP amino acid G 530
G	94.27	95.54
A	4.41	4.46
-	1.32	0.00

CvFAP amino acid I 531
I	53.74	54.46
L	25.99	26.34
V	9.69	9.82
M	8.81	8.93
-	1.32	0.00
Y	0.44	0.45

CvFAP amino acid H 532
K	55.07	55.80
R	32.60	33.04
E	3.08	3.12
Q	3.08	3.12
H	2.64	2.68
-	1.32	0.00
S	0.88	0.89
D	0.88	0.89
N	0.44	0.45

CvFAP amino acid W 533
L	77.97	79.37
I	6.61	6.73
K	6.61	6.73
M	3.52	3.59
W	2.20	2.24
-	1.76	0.00
F	0.88	0.90
G	0.44	0.45

CvFAP amino acid A 534
G	39.21	39.91
A	27.75	28.25
S	26.87	27.35
C	2.64	2.69
-	1.76	0.00
T	1.32	1.35
N	0.44	0.45

CvFAP amino acid R 535
R	96.48	98.21
-	1.76	0.00
Q	0.88	0.90
V	0.44	0.45
D	0.44	0.45

CvFAP amino acid D 536
K	37.00	37.67
R	20.26	20.63
E	13.22	13.45
Q	10.57	10.76
D	6.17	6.28
S	4.85	4.93
N	2.20	2.24
-	1.76	0.00
M	1.32	1.35
T	0.88	0.90
L	0.88	0.90
A	0.44	0.45
H	0.44	0.45

CvFAP amino acid V 537
L	51.54	52.47
I	34.80	35.43
V	6.17	6.28
M	3.96	4.04
-	1.76	0.00
E	0.44	0.45
R	0.44	0.45
F	0.44	0.45
W	0.44	0.45

CvFAP amino acid A 538
A	49.34	50.22
G	22.47	22.87
L	7.49	7.62
C	7.05	7.17
V	4.41	4.48
S	3.52	3.59
-	1.76	0.00
I	1.32	1.35
F	1.32	1.35
H	0.44	0.45
T	0.44	0.45
M	0.44	0.45

CvFAP amino acid R 539
K	17.62	18.26
Q	17.62	18.26
A	17.18	17.81
S	15.42	15.98
N	8.81	9.13
R	7.49	7.76
E	3.96	4.11
-	3.52	0.00
H	2.20	2.28
T	2.20	2.28
D	1.32	1.37
G	0.88	0.91
V	0.44	0.46
C	0.44	0.46
L	0.44	0.46
M	0.44	0.46

CvFAP amino acid S 540
Q	30.84	31.96
S	20.70	21.46
T	18.06	18.72
R	11.45	11.87
A	9.69	10.05
-	3.52	0.00
D	1.76	1.83
H	1.32	1.37
G	0.88	0.91
E	0.88	0.91
K	0.44	0.46
C	0.44	0.46

CvFAP amino acid S 541
P	23.79	24.22
A	15.86	16.14
E	14.98	15.25
S	11.01	11.21
K	8.37	8.52
G	7.49	7.62
D	6.61	6.73
Q	3.96	4.04
R	1.76	1.79
N	1.76	1.79
-	1.76	0.00
V	1.32	1.35
T	0.88	0.90
H	0.44	0.45

CvFAP amino acid A 542
A	44.05	44.84
E	17.62	17.94
P	15.42	15.70
S	11.01	11.21
Q	2.64	2.69
T	2.64	2.69
D	1.76	1.79
-	1.76	0.00
V	1.32	1.35
K	0.88	0.90
G	0.44	0.45
N	0.44	0.45

CvFAP amino acid L 543
F	61.23	62.61
L	16.30	16.67
W	13.66	13.96
M	6.17	6.31
-	2.20	0.00
K	0.44	0.45

CvFAP amino acid S 544
D	18.94	19.37
A	18.50	18.92
K	18.50	18.92
G	15.86	16.22
S	12.78	13.06
E	8.37	8.56
-	2.20	0.00
R	1.76	1.80
Q	1.76	1.80
N	0.88	0.90
T	0.44	0.45

CvFAP amino acid E 545
E	29.52	30.18
K	14.98	15.32
D	11.45	11.71
A	10.13	10.36
Q	10.13	10.36
S	7.49	7.66
G	7.49	7.66
P	3.08	3.15
-	2.20	0.00
N	1.32	1.35
R	0.88	0.90
V	0.88	0.90
H	0.44	0.45

CvFAP amino acid Y 546
Y	59.47	60.81
V	14.10	14.41
F	11.89	12.16
L	6.61	6.76
I	3.52	3.60
-	2.20	0.00
M	0.88	0.90
H	0.88	0.90
W	0.44	0.45

CvFAP amino acid L 547
L	33.04	33.78
R	27.75	28.38
N	8.37	8.56
V	7.05	7.21
I	5.73	5.86
K	5.29	5.41
A	3.08	3.15
S	2.64	2.70
E	2.20	2.25
-	2.20	0.00
F	0.88	0.90
G	0.88	0.90
T	0.88	0.90

CvFAP amino acid D 548
G	51.98	53.15
D	11.45	11.71
A	9.69	9.91
P	9.25	9.46
T	6.61	6.76
E	3.08	3.15
K	2.20	2.25
-	2.20	0.00
Q	1.76	1.80
S	1.32	1.35
L	0.44	0.45

CvFAP amino acid G 549
E	42.73	43.69
V	8.37	8.56
G	7.05	7.21
H	7.05	7.21
D	7.05	7.21
S	4.85	4.95
P	3.96	4.05
N	3.52	3.60
A	3.52	3.60
K	3.08	3.15
R	2.20	2.25
-	2.20	0.00
Q	1.76	1.80
T	1.32	1.35
F	1.32	1.35

CvFAP amino acid E 550
E	96.92	99.10
-	2.20	0.00
Q	0.88	0.90

CvFAP amino acid L 551
V	51.98	53.15
L	20.70	21.17
I	6.61	6.76
T	5.29	5.41
A	3.96	4.05
E	3.08	3.15
R	2.64	2.70
-	2.20	0.00
K	1.32	1.35
C	0.88	0.90
G	0.88	0.90
Y	0.44	0.45

CvFAP amino acid F 552
F	54.63	55.86
Y	33.48	34.23
W	7.05	7.21
H	2.64	2.70
-	2.20	0.00

CvFAP amino acid P 553
P	97.80	100.00
-	2.20	0.00

CvFAP amino acid G 554
G	93.39	95.50
S	2.64	2.70
-	2.20	0.00
R	0.88	0.90
E	0.88	0.90

CvFAP amino acid S 555
P	28.63	29.28
A	18.06	18.47
E	14.98	15.32
T	10.13	10.36
K	6.61	6.76
S	3.96	4.05
L	3.52	3.60
I	3.08	3.15
V	2.20	2.25
-	2.20	0.00
R	1.76	1.80
G	1.76	1.80
N	1.76	1.80
Q	1.32	1.35

CvFAP amino acid G 556
D	26.87	27.98
A	24.23	25.23
E	14.98	15.60
H	7.49	7.80
G	6.61	6.88
-	3.96	0.00
Q	3.08	3.21
S	3.08	3.21
K	3.08	3.21
R	2.64	2.75
N	2.64	2.75
T	0.44	0.46
P	0.44	0.46
L	0.44	0.46

CvFAP amino acid V 557
V	70.04	73.61
I	10.13	10.65
-	4.85	0.00
A	4.41	4.63
F	3.96	4.17
L	3.08	3.24
K	0.88	0.93
R	0.88	0.93
C	0.44	0.46
M	0.44	0.46
T	0.44	0.46
D	0.44	0.46

CvFAP amino acid V 558
Q	54.63	57.41
V	9.25	9.72
S	7.93	8.33
K	5.29	5.56
-	4.85	0.00
A	3.96	4.17
E	3.96	4.17
T	3.52	3.70
R	2.64	2.78
N	1.32	1.39
D	1.32	1.39
L	0.88	0.93
C	0.44	0.46

CvFAP amino acid S 559
T	46.26	47.73
S	39.21	40.45
D	5.29	5.45
-	3.08	0.00
K	1.32	1.36
E	1.32	1.36
N	1.32	1.36
L	0.88	0.91
A	0.88	0.91
R	0.44	0.45

CvFAP amino acid D 560
D	86.34	89.09
E	4.41	4.55
-	3.08	0.00
P	2.64	2.73
N	2.20	2.27
K	0.88	0.91
A	0.44	0.45

CvFAP amino acid D 561
A	41.41	42.73
E	29.96	30.91
D	8.81	9.09
K	5.29	5.45
R	3.08	3.18
-	3.08	0.00
S	2.64	2.73
N	1.32	1.36
Q	0.88	0.91
G	0.88	0.91
M	0.88	0.91
V	0.88	0.91
T	0.44	0.45
H	0.44	0.45

CvFAP amino acid Q 562
E	40.97	41.89
D	22.47	22.97
Q	19.82	20.27
A	13.66	13.96
-	2.20	0.00
G	0.88	0.90

CvFAP amino acid I 563
I	47.58	48.65
L	44.93	45.95
V	3.52	3.60
-	2.20	0.00
D	0.88	0.90
A	0.44	0.45
F	0.44	0.45

CvFAP amino acid D 564
D	64.32	65.77
E	18.50	18.92
A	5.29	5.41
N	4.41	4.50
V	2.64	2.70
-	2.20	0.00
L	1.32	1.35
I	0.88	0.90
S	0.44	0.45

CvFAP amino acid E 565
E	39.65	40.72
A	27.75	28.51
S	8.37	8.60
D	5.73	5.88
K	3.96	4.07
T	3.52	3.62
Q	3.08	3.17
N	3.08	3.17
-	2.64	0.00
R	1.76	1.81
G	0.44	0.45

CvFAP amino acid Y 566
Y	89.87	92.31
F	7.49	7.69
-	2.64	0.00

CvFAP amino acid I 567
I	69.16	71.04
V	16.30	16.74
L	10.57	10.86
-	2.64	0.00
A	0.88	0.90
C	0.44	0.45

CvFAP amino acid R 568
R	63.00	64.71
K	10.13	10.41
A	9.25	9.50
D	8.37	8.60
S	5.29	5.43
-	2.64	0.00
E	0.88	0.90
L	0.44	0.45

CvFAP amino acid R 569
N	24.23	24.89
S	19.82	20.36
R	11.89	12.22
D	11.45	11.76
Q	9.25	9.50
K	5.73	5.88
E	3.96	4.07
T	3.96	4.07
G	3.52	3.62
A	3.52	3.62
-	2.64	0.00

CvFAP amino acid S 570
T	46.70	47.96
S	44.93	46.15
N	3.96	4.07
-	2.64	0.00
H	1.32	1.36
G	0.44	0.45

CvFAP amino acid I 571
V	41.85	42.60
I	17.62	17.94
A	17.18	17.49
L	10.57	10.76
C	5.29	5.38
T	3.52	3.59
-	1.76	0.00
M	1.32	1.35
K	0.44	0.45
S	0.44	0.45

CvFAP amino acid H 572
H	94.71	96.85
C	3.08	3.15
-	2.20	0.00

CvFAP amino acid S 573
S	52.86	54.30
T	44.49	45.70
-	2.64	0.00

CvFAP amino acid S 574
A	68.72	70.59
G	17.62	18.10
S	11.01	11.31
-	2.64	0.00

CvFAP amino acid N 575
N	97.36	100.00
-	2.64	0.00

CvFAP amino acid A 576
A	97.80	100.00
-	2.20	0.00

CvFAP amino acid I 577
L	71.81	73.42
I	15.42	15.77
V	8.81	9.01
-	2.20	0.00
M	1.32	1.35
N	0.44	0.45

CvFAP amino acid T 578
V	72.69	74.66
T	21.59	22.17
-	2.64	0.00
A	2.20	2.26
G	0.44	0.45
I	0.44	0.45

CvFAP amino acid G 579
G	91.63	94.12
S	5.73	5.88
-	2.64	0.00

CvFAP amino acid T 580
T	72.25	74.21
S	25.11	25.79
-	2.64	0.00

CvFAP amino acid C 581
C	95.15	97.74
-	2.64	0.00
A	2.20	2.26

CvFAP amino acid K 582
R	59.03	60.63
K	29.96	30.77
A	7.05	7.24
-	2.64	0.00
S	0.88	0.90
Q	0.44	0.45

CvFAP amino acid M 583
M	92.51	95.02
I	2.64	2.71
-	2.64	0.00
L	2.20	2.26

CvFAP amino acid G 584
G	96.04	98.64
-	2.64	0.00
S	0.88	0.90
A	0.44	0.45

CvFAP amino acid N 585
T	18.50	19.27
A	15.42	16.06
P	12.33	12.84
R	10.57	11.01
V	7.93	8.26
S	6.61	6.88
Q	5.73	5.96
E	5.29	5.50
D	4.41	4.59
-	3.96	0.00
G	2.20	2.29
H	1.76	1.83
L	1.76	1.83
N	1.32	1.38
I	0.88	0.92
K	0.88	0.92
C	0.44	0.46

CvFAP amino acid A 586
A	22.91	24.19
D	19.38	20.47
G	13.66	14.42
S	11.01	11.63
N	7.05	7.44
P	6.61	6.98
-	5.29	0.00
E	4.85	5.12
V	3.52	3.72
L	1.32	1.40
K	1.32	1.40
T	0.88	0.93
R	0.88	0.93
I	0.44	0.47
C	0.44	0.47
H	0.44	0.47

CvFAP amino acid G 587
A	20.70	21.66
S	17.62	18.43
K	12.78	13.36
P	11.45	11.98
D	8.37	8.76
G	6.17	6.45
E	5.29	5.53
N	4.85	5.07
-	4.41	0.00
R	3.08	3.23
T	2.20	2.30
Q	1.32	1.38
V	0.88	0.92
I	0.44	0.46
H	0.44	0.46

CvFAP amino acid D 588
D	59.47	62.21
K	11.45	11.98
R	5.29	5.53
A	4.41	4.61
E	4.41	4.61
G	4.41	4.61
-	4.41	0.00
T	1.76	1.84
H	1.32	1.38
M	1.32	1.38
S	0.88	0.92
P	0.44	0.46
Q	0.44	0.46

CvFAP amino acid S 589
-	38.33	0.00
P	25.99	42.14
A	10.57	17.14
S	6.17	10.00
K	3.96	6.43
N	3.52	5.71
D	3.52	5.71
R	3.08	5.00
E	3.08	5.00
G	0.88	1.43
Q	0.44	0.71
T	0.44	0.71

CvFAP amino acid S 590
-	18.94	0.00
G	16.30	20.11
L	13.66	16.85
D	9.25	11.41
N	8.37	10.33
T	7.49	9.24
Q	7.05	8.70
M	4.41	5.43
S	3.96	4.89
A	3.52	4.35
E	2.64	3.26
K	1.32	1.63
Y	1.32	1.63
H	0.44	0.54
F	0.44	0.54
P	0.44	0.54
R	0.44	0.54

CvFAP amino acid S 591
A	66.08	69.44
S	10.57	11.11
T	7.93	8.33
-	4.85	0.00
D	4.41	4.63
C	3.96	4.17
G	1.32	1.39
V	0.44	0.46
N	0.44	0.46

CvFAP amino acid V 592
V	94.71	97.73
-	3.08	0.00
A	2.20	2.27

CvFAP amino acid V 593
V	74.89	77.27
L	12.33	12.73
C	9.69	10.00
-	3.08	0.00

CvFAP amino acid D 594
D	74.45	76.82
S	10.13	10.45
G	6.17	6.36
T	3.52	3.64
-	3.08	0.00
N	2.64	2.73

CvFAP amino acid N 595
P	43.17	44.55
S	21.59	22.27
A	12.33	12.73
N	7.93	8.18
T	5.73	5.91
-	3.08	0.00
G	1.76	1.82
K	1.76	1.82
Q	0.88	0.91
H	0.44	0.45
E	0.44	0.45
V	0.44	0.45
C	0.44	0.45

CvFAP amino acid Q 596
E	30.84	31.82
D	25.11	25.91
Q	12.78	13.18
A	7.05	7.27
S	5.29	5.45
H	4.85	5.00
R	3.96	4.09
K	3.52	3.64
-	3.08	0.00
N	2.64	2.73
M	0.44	0.45
T	0.44	0.45

CvFAP amino acid L 597
L	79.74	82.27
M	14.10	14.55
-	3.08	0.00
F	1.76	1.82
C	1.32	1.36

CvFAP amino acid R 598
R	65.20	67.27
K	22.47	23.18
S	3.08	3.18
-	3.08	0.00
Q	2.64	2.73
C	1.76	1.82
N	0.88	0.91
F	0.44	0.45
A	0.44	0.45

CvFAP amino acid V 599
V	91.19	94.09
I	3.96	4.09
-	3.08	0.00
L	1.76	1.82

CvFAP amino acid H 600
H	20.70	21.36
R	17.62	18.18
K	14.54	15.00
F	13.22	13.64
I	12.33	12.73
M	4.85	5.00
N	3.08	3.18
L	3.08	3.18
-	3.08	0.00
V	2.64	2.73
T	1.32	1.36
W	0.88	0.91
S	0.88	0.91
Y	0.88	0.91
Q	0.44	0.45
C	0.44	0.45

CvFAP amino acid G 601
G	94.71	97.73
-	3.08	0.00
R	1.32	1.36
H	0.44	0.45
S	0.44	0.45

CvFAP amino acid V 602
V	70.04	72.27
I	8.37	8.64
L	7.05	7.27
T	5.29	5.45
F	3.08	3.18
-	3.08	0.00
M	1.76	1.82
C	0.88	0.91
A	0.44	0.45

CvFAP amino acid E 603
S	15.86	16.36
K	12.78	13.18
A	11.01	11.36
N	11.01	11.36
E	10.57	10.91
G	10.13	10.45
R	5.73	5.91
T	5.29	5.45
Q	4.41	4.55
D	3.08	3.18
-	3.08	0.00
P	2.64	2.73
H	2.20	2.27
M	0.88	0.91
C	0.44	0.45
V	0.44	0.45
Y	0.44	0.45

CvFAP amino acid G 604
G	49.34	50.91
N	16.74	17.27
R	10.13	10.45
A	10.13	10.45
S	9.69	10.00
-	3.08	0.00
Q	0.88	0.91

CvFAP amino acid L 605
L	75.33	78.08
V	15.86	16.44
I	4.85	5.02
-	3.52	0.00
M	0.44	0.46

CvFAP amino acid R 606
R	95.59	99.54
-	3.96	0.00
H	0.44	0.46

CvFAP amino acid V 607
V	84.58	88.07
I	11.45	11.93
-	3.96	0.00

CvFAP amino acid V 608
V	34.36	36.11
I	23.35	24.54
A	19.38	20.37
C	17.62	18.52
-	4.85	0.00
L	0.44	0.46

CvFAP amino acid D 609
D	95.15	100.00
-	4.85	0.00

CvFAP amino acid A 610
A	60.35	63.43
S	34.80	36.57
-	4.85	0.00

CvFAP amino acid S 611
S	95.15	100.00
-	4.85	0.00

CvFAP amino acid V 612
V	68.28	71.76
I	11.01	11.57
A	10.13	10.65
T	5.29	5.56
-	4.85	0.00
L	0.44	0.46

CvFAP amino acid V 613
M	50.22	52.53
I	24.23	25.35
F	14.54	15.21
-	4.41	0.00
L	3.08	3.23
V	3.08	3.23
A	0.44	0.46

CvFAP amino acid P 614
P	94.71	100.00
-	5.29	0.00

CvFAP amino acid K 615
K	22.91	24.19
Q	15.86	16.74
R	13.22	13.95
V	12.78	13.49
T	12.33	13.02
I	7.05	7.44
-	5.29	0.00
H	2.20	2.33
A	2.20	2.33
N	1.32	1.40
S	1.32	1.40
G	1.32	1.40
C	0.88	0.93
E	0.88	0.93
L	0.44	0.47

CvFAP amino acid I 616
I	52.42	55.61
L	34.80	36.92
M	7.05	7.48
-	5.73	0.00

CvFAP amino acid P 617
P	81.50	86.05
I	7.05	7.44
-	5.29	0.00
V	3.96	4.19
T	1.32	1.40
M	0.88	0.93

CvFAP amino acid G 618
G	94.27	100.00
-	5.73	0.00

CvFAP amino acid G 619
G	87.22	92.52
-	5.73	0.00
A	4.85	5.14
C	2.20	2.34

CvFAP amino acid Q 620
Q	94.27	100.00
-	5.73	0.00

CvFAP amino acid T 621
T	76.21	80.84
S	11.89	12.62
-	5.73	0.00
L	2.20	2.34
A	1.32	1.40
V	0.88	0.93
I	0.88	0.93
P	0.44	0.47
M	0.44	0.47

CvFAP amino acid G 622
G	51.98	55.14
A	20.70	21.96
C	17.62	18.69
-	5.73	0.00
V	1.76	1.87
Q	1.32	1.40
S	0.88	0.93

CvFAP amino acid A 623
A	66.08	70.09
T	13.66	14.49
S	11.89	12.62
-	5.73	0.00
G	1.32	1.40
V	0.88	0.93
P	0.44	0.47

CvFAP amino acid P 624
P	52.42	56.40
S	19.38	20.85
A	9.69	10.43
-	7.05	0.00
C	5.29	5.69
T	3.52	3.79
G	1.32	1.42
V	0.88	0.95
I	0.44	0.47

CvFAP amino acid V 625
T	79.30	85.31
V	12.33	13.27
-	7.05	0.00
A	1.32	1.42

CvFAP amino acid V 626
V	60.35	64.93
I	14.54	15.64
L	7.93	8.53
-	7.05	0.00
M	3.96	4.27
F	3.08	3.32
Y	1.32	1.42
T	1.32	1.42
A	0.44	0.47

CvFAP amino acid M 627
M	85.02	91.47
A	7.49	8.06
-	7.05	0.00
L	0.44	0.47

CvFAP amino acid I 628
I	59.47	63.98
V	21.15	22.75
L	9.25	9.95
-	7.05	0.00
M	2.20	2.37
Q	0.88	0.95

CvFAP amino acid A 629
A	91.19	98.57
-	7.49	0.00
V	0.88	0.95
G	0.44	0.48

CvFAP amino acid E 630
E	90.31	97.62
-	7.49	0.00
D	2.20	2.38

CvFAP amino acid R 631
R	54.63	59.33
K	36.56	39.71
-	7.93	0.00
H	0.88	0.96

CvFAP amino acid A 632
A	74.89	81.73
G	15.86	17.31
-	8.37	0.00
V	0.44	0.48
L	0.44	0.48

CvFAP amino acid A 633
A	80.62	88.41
S	10.13	11.11
-	8.81	0.00
C	0.44	0.48

CvFAP amino acid A 634
D	40.97	48.69
A	18.50	21.99
-	15.86	0.00
E	15.86	18.85
S	2.20	2.62
R	1.32	1.57
H	1.32	1.57
N	1.32	1.57
V	0.88	1.05
K	0.88	1.05
T	0.44	0.52
L	0.44	0.52

CvFAP amino acid L 635
L	29.52	35.26
M	25.11	30.00
F	17.62	21.05
-	16.30	0.00
I	8.81	10.53
V	1.76	2.11
E	0.44	0.53
N	0.44	0.53

CvFAP amino acid L 636
L	44.05	52.91
I	29.07	34.92
-	16.74	0.00
V	6.61	7.94
M	3.52	4.23

CvFAP amino acid T 637
-	59.91	0.00
L	14.98	37.36
R	6.61	16.48
T	6.17	15.38
K	3.52	8.79
V	2.64	6.59
I	1.32	3.30
A	0.88	2.20
M	0.88	2.20
F	0.44	1.10
H	0.44	1.10
W	0.44	1.10
Q	0.44	1.10
S	0.44	1.10
C	0.44	1.10
E	0.44	1.10

CvFAP amino acid G 638
-	61.67	0.00
G	19.82	51.72
A	6.17	16.09
S	3.08	8.05
R	2.64	6.90
K	2.20	5.75
D	0.88	2.30
N	0.88	2.30
T	0.88	2.30
H	0.44	1.15
Q	0.44	1.15
I	0.44	1.15
E	0.44	1.15

CvFAP amino acid K 639
-	69.16	0.00
K	7.93	25.71
G	5.73	18.57
Q	3.52	11.43
A	3.52	11.43
H	1.76	5.71
E	1.32	4.29
S	1.32	4.29
R	1.32	4.29
P	0.88	2.86
T	0.88	2.86
D	0.88	2.86
Y	0.88	2.86
L	0.44	1.43
X	0.44	1.43

CvFAP amino acid A 640
-	74.89	0.00
A	9.25	36.84
R	3.96	15.79
Q	2.20	8.77
T	1.32	5.26
H	1.32	5.26
K	1.32	5.26
V	1.32	5.26
L	0.88	3.51
W	0.88	3.51
E	0.88	3.51
N	0.44	1.75
G	0.44	1.75
I	0.44	1.75
D	0.44	1.75

CvFAP amino acid T 641
-	77.09	0.00
A	3.96	17.31
T	3.96	17.31
Q	3.08	13.46
P	2.64	11.54
G	2.20	9.62
S	1.76	7.69
L	1.32	5.77
K	0.88	3.85
V	0.88	3.85
I	0.88	3.85
E	0.88	3.85
R	0.44	1.92

CvFAP amino acid I 642
-	77.53	0.00
I	4.41	19.61
A	3.52	15.69
L	2.64	11.76
S	2.64	11.76
D	1.76	7.84
M	1.32	5.88
P	1.32	5.88
Q	0.88	3.92
R	0.88	3.92
E	0.88	3.92
V	0.88	3.92
G	0.44	1.96
K	0.44	1.96
T	0.44	1.96

CvFAP amino acid G 643
-	78.85	0.00
A	5.29	25.00
V	4.41	20.83
G	2.64	12.50
E	2.20	10.42
L	1.76	8.33
Q	1.32	6.25
S	1.32	6.25
T	0.44	2.08
I	0.44	2.08
R	0.44	2.08
K	0.44	2.08
M	0.44	2.08

CvFAP amino acid A 644
-	80.18	0.00
A	3.52	17.78
P	3.08	15.56
G	2.20	11.11
S	1.76	8.89
V	1.76	8.89
K	1.76	8.89
E	1.32	6.67
R	1.32	6.67
T	0.88	4.44
D	0.88	4.44
H	0.44	2.22
N	0.44	2.22
I	0.44	2.22

CvFAP amino acid S 645
-	80.18	0.00
A	4.41	22.22
G	3.96	20.00
S	3.52	17.78
E	2.20	11.11
T	1.76	8.89
V	1.32	6.67
P	0.88	4.44
R	0.44	2.22
L	0.44	2.22
N	0.44	2.22
K	0.44	2.22

CvFAP amino acid A 646
-	80.18	0.00
A	4.41	22.22
S	2.64	13.33
R	2.20	11.11
T	2.20	11.11
M	1.32	6.67
P	0.88	4.44
Y	0.88	4.44
V	0.88	4.44
G	0.88	4.44
H	0.88	4.44
F	0.88	4.44
D	0.88	4.44
E	0.44	2.22
K	0.44	2.22

CvFAP amino acid A 647
-	81.06	0.00
A	6.17	32.56
P	2.64	13.95
T	2.20	11.63
S	1.76	9.30
Q	1.32	6.98
G	1.32	6.98
M	0.88	4.65
L	0.88	4.65
K	0.88	4.65
V	0.44	2.33
E	0.44	2.33

CvFAP amino acid A 648
-	82.82	0.00
A	4.41	25.64
P	3.52	20.51
V	2.20	12.82
G	2.20	12.82
S	1.32	7.69
Q	1.32	7.69
T	0.88	5.13
R	0.44	2.56
N	0.44	2.56
I	0.44	2.56

CvFAP amino acid P 649
-	82.82	0.00
A	4.41	25.64
P	2.20	12.82
Q	1.76	10.26
G	1.76	10.26
S	1.76	10.26
V	1.32	7.69
E	0.88	5.13
L	0.88	5.13
R	0.88	5.13
C	0.44	2.56
T	0.44	2.56
F	0.44	2.56

CvFAP amino acid A 650
-	82.82	0.00
A	7.93	46.15
D	2.20	12.82
V	1.32	7.69
E	0.88	5.13
S	0.88	5.13
G	0.88	5.13
I	0.88	5.13
P	0.44	2.56
T	0.44	2.56
H	0.44	2.56
K	0.44	2.56
R	0.44	2.56

CvFAP amino acid T 651
-	87.67	0.00
P	3.96	32.14
T	2.20	17.86
L	2.20	17.86
K	1.76	14.29
A	0.88	7.14
H	0.44	3.57
N	0.44	3.57
S	0.44	3.57

CvFAP amino acid V 652
-	87.22	0.00
V	7.93	62.07
A	3.52	27.59
S	0.88	6.90
D	0.44	3.45

CvFAP amino acid A 653
-	87.67	0.00
A	7.05	57.14
L	2.64	21.43
G	0.88	7.14
F	0.88	7.14
H	0.44	3.57
E	0.44	3.57

CvFAP amino acid A 654
-	87.67	0.00
A	6.61	53.57
V	1.32	10.71
T	1.32	10.71
S	1.32	10.71
D	0.88	7.14
K	0.44	3.57
G	0.44	3.57
