# Supplementary material
Source: MDPI journal article supplement (https://www.mdpi.com/2073-4344/10/9/1072)

Sequence logo for FAP proteins. Residue numbers correspond to CvFAP.

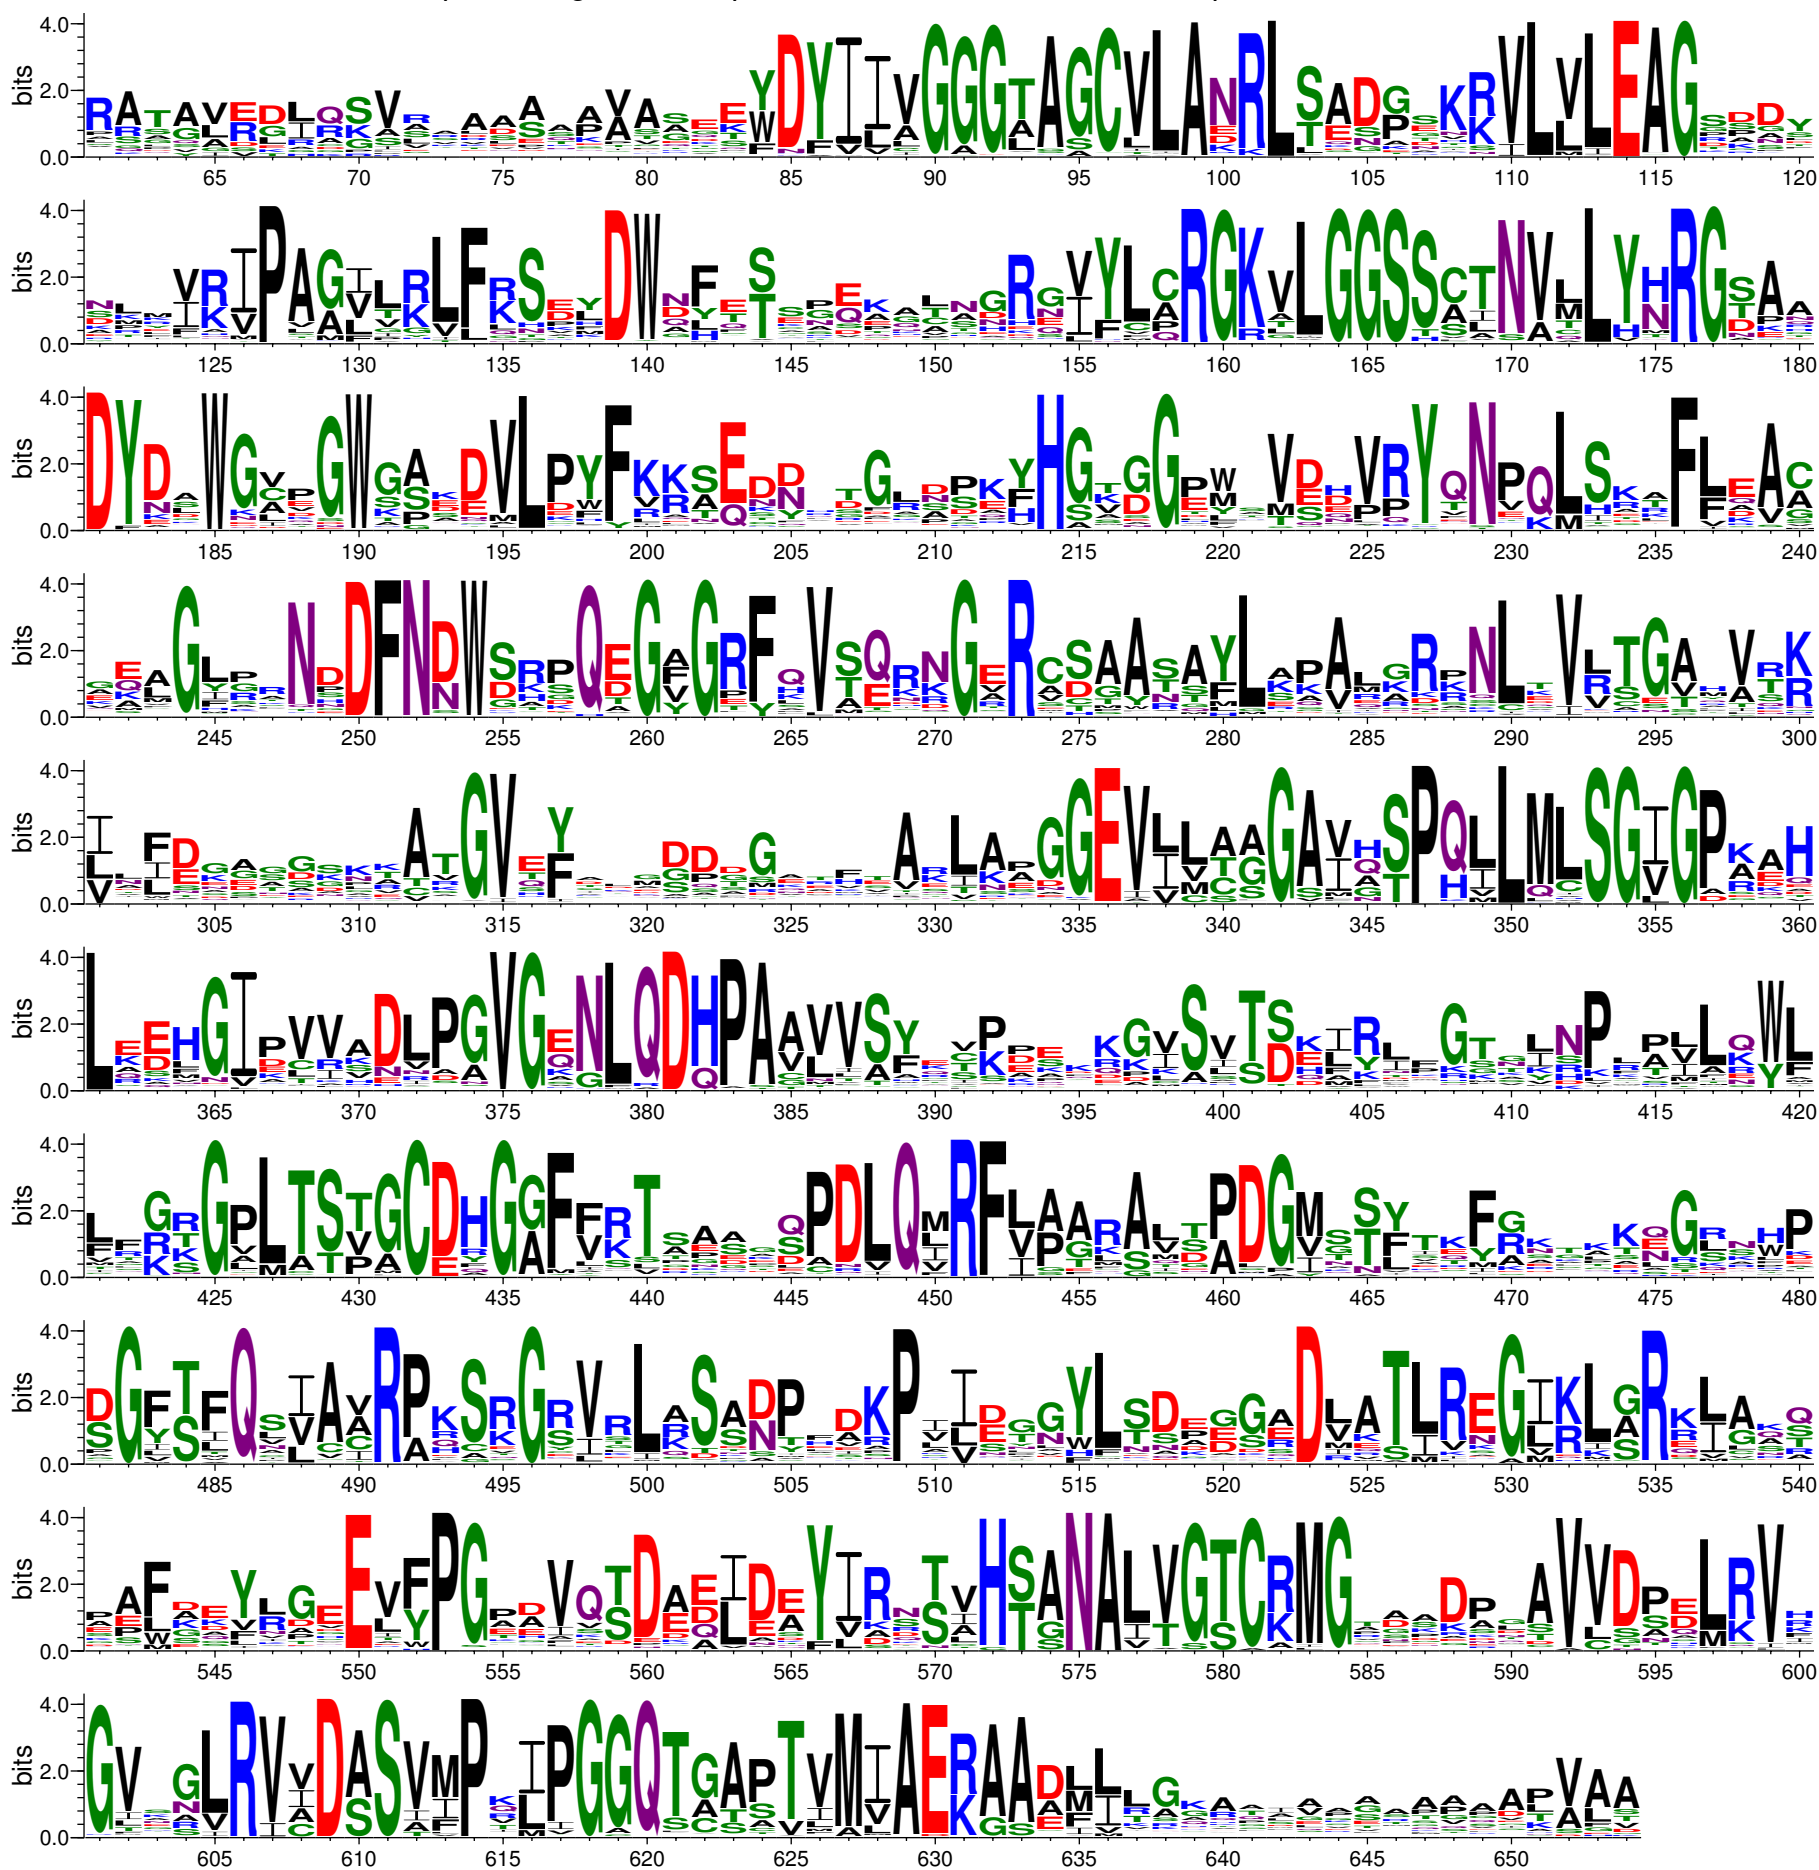

Supplement: s1 [file s1 › catalysts-923799-sm-r1/Supplementary Figure S2.pdf]
